# Supplementary material for: Doxycycline Changes the Transcriptome Profile of mIMCD3 Renal Epithelial Cells
Source: Front Physiol. 2021 Nov 5;12:771691. doi: 10.3389/fphys.2021.771691 (PMC8602682; doi:10.3389/fphys.2021.771691)
Supplement: Supplementary file 1 [file Table_1.XLSX]

## Sheet: TPM_mIMCD3_full
Ensembl_gene_ID	Gene_symbol	Description	TFs	Kinases	Transporters	IonChannels	GPCRs	dmso.3d.1	dmso.3d.2	dmso.3d.3	dmso.3d.4	dmso.6d.1	dmso.6d.2	dmso.6d.3	dmso.6d.4	Mean (TPM)	S.E.M.	Rank
ENSMUSG00000050621	Rps27rt	ribosomal protein S27, retrogene						18919.4	16647.1	16076.2	15437.4	13915.4	15271.2	14984.5	15679.4	15866.3	519.815	1
ENSMUSG00000093674	Rpl41	ribosomal protein L41						11956.1	12586.7	11448.5	11507.6	11542.4	10086.9	9474.48	9122.58	10965.7	440.393	2
ENSMUSG00000067038	Rps12-ps3	ribosomal protein S12, pseudogene 3						11090.9	9959.94	9265.27	8916.03	8330.97	8871.89	8274.31	8374.3	9135.46	343.466	3
ENSMUSG00000079523	Tmsb10	thymosin, beta 10						8913.24	8493.66	8263.42	7734.38	7910.96	9017.53	8405.26	8413.9	8394.04	155.513	4
ENSMUSG00000060126	Tpt1	tumor protein, translationally-controlled 1						9312.17	7833.45	7947.29	7117.03	6405.36	7991.42	7671.41	8265.27	7817.93	298.449	5
ENSMUSG00000063457	Rps15	ribosomal protein S15						8525.97	8312.35	7702.36	7605.81	7864.67	7606.76	6939.93	6839.75	7674.7	207.644	6
ENSMUSG00000034892	Rps29	ribosomal protein S29						8652.26	8946.33	8368.65	8127.31	7136.59	7046.24	6341.61	6661.08	7660.01	347.092	7
ENSMUSG00000037742	Eef1a1	eukaryotic translation elongation factor 1 alpha 1						7887.57	7681.53	7512.86	7301.34	7633.29	7502.03	7488.86	7614.44	7577.74	60.5681	8
ENSMUSG00000057841	Rpl32	ribosomal protein L32						8149.41	7377.05	6958.34	6605.63	6110.3	6578.22	6135.22	6109.76	6752.99	255.031	9
ENSMUSG00000058546	Rpl23a	ribosomal protein L23A						8123.96	7096.57	6770.75	6468.31	5976.68	6710.7	6333.28	6533.64	6751.74	227.866	10
ENSMUSG00000060636	Rpl35a	ribosomal protein L35A						7037.54	6347.2	6061.42	5704.26	5556.28	6379.93	5897.48	6024.01	6126.02	164.401	11
ENSMUSG00000102070	Gm28661	predicted gene 28661						5549.64	6019.49	6361.49	7151.09	5930.5	5329.04	5736.08	6921.89	6124.9	227.903	12
ENSMUSG00000045128	Rpl18a	ribosomal protein L18A						6787.51	6426.32	6015.79	5785.5	5895.32	6422.26	5961.63	5557.92	6106.53	142.901	13
ENSMUSG00000067288	Rps28	ribosomal protein S28						7047.23	6885.46	6588.09	6376.37	5607.61	5620.27	5182.55	5312.16	6077.47	259.111	14
ENSMUSG00000098973	Mir6236	microRNA 6236						4688.86	5054.71	5538.41	7265.83	6030.04	5311.61	7292.49	6247.83	5928.72	343.151	15
ENSMUSG00000064351	mt-Co1	mitochondrially encoded cytochrome c oxidase I						5287.41	5671.74	6032.79	6539.28	5338.6	5622.16	5725.85	6511.79	5841.2	170.242	16
ENSMUSG00000038274	Fau	Finkel-Biskis-Reilly murine sarcoma virus (FBR-MuSV) ubiquitously expressed (fox derived)						6370.7	6190.56	5805.89	5641.97	5853.62	5599.19	5242.33	5095.7	5725	152.858	17
ENSMUSG00000069682	Gm10275	predicted pseudogene 10275						6979.8	5970.33	5671.35	5336.86	5179.8	5757.44	5378.35	5360.86	5704.35	204.235	18
ENSMUSG00000039001	Rps21	ribosomal protein S21						6361.45	6061.57	5734.08	5409.89	5295.49	5651.54	5395.73	5358.59	5658.54	134.625	19
ENSMUSG00000062353	Gm15772	predicted gene 15772						6473.21	5740.21	5431.35	5233.55	5158.07	5663.73	5330.85	5271.2	5537.77	152	20
ENSMUSG00000074129	Rpl13a	ribosomal protein L13A						6229.64	6011.73	5629.72	5523.15	5287.88	5257.79	4965.18	4684.94	5448.75	181.492	21
ENSMUSG00000007892	Rplp1	ribosomal protein, large, P1						6126.05	5658.35	5237.98	4970.72	5138.65	5264.5	4839.39	4658.49	5236.77	165.941	22
ENSMUSG00000057322	Rpl38	ribosomal protein L38						5903.09	5915.73	5349.41	5277.57	4683.94	4839.42	4418.46	4782.8	5146.3	197.894	23
ENSMUSG00000024608	Rps14	ribosomal protein S14						6190.32	5090.03	4764.23	4454.33	4541.95	5402.25	5265.88	4738.52	5055.94	201.067	24
ENSMUSG00000025290	Rps24	ribosomal protein S24						5890.8	5242.48	5060.5	4896.31	4469.67	5182.98	4752.55	4915.26	5051.32	148.132	25
ENSMUSG00000068396	Rpl34-ps1	ribosomal protein L34, pseudogene 1						5920.89	5123.4	4788.17	4641.32	4370.17	4711.52	4458.15	4372.68	4798.29	183.143	26
ENSMUSG00000086583	Gm15500	predicted pseudogene 15500						5289.12	4680	4552.5	4261.86	4413.83	4983.31	4826.3	4879.3	4735.78	116.589	27
ENSMUSG00000047215	Rpl9	ribosomal protein L9						4953.03	4631.89	4399.42	4203.96	4385.1	5038.83	4812.31	4779.48	4650.5	105.083	28
ENSMUSG00000062328	Rpl17	ribosomal protein L17						5347.3	4795.29	4578.59	4342.55	4091.74	4742.68	4443.04	4595.09	4617.03	131.227	29
ENSMUSG00000008668	Rps18	ribosomal protein S18						5250.55	4711.11	4313.09	4271.75	4101.82	4370.08	4222.12	4134.43	4421.87	135.776	30
ENSMUSG00000028081	Rps3a1	ribosomal protein S3A1						5075.01	4504.81	4346.58	4039.08	3845.45	4424.09	4291.32	4282.39	4351.09	127.78	31
ENSMUSG00000067274	Rplp0	ribosomal protein, large, P0						4989.72	4579.23	4202.27	4021.16	4283.35	4356.58	4064.29	3878.61	4296.9	125.18	32
ENSMUSG00000057666	Gapdh	glyceraldehyde-3-phosphate dehydrogenase						3726.58	4259.03	4215.13	4074.98	4868.33	4305.8	4310.94	4214.66	4246.93	111.502	33
ENSMUSG00000057863	Rpl36	ribosomal protein L36						4622.35	4698.32	4406.42	4234.91	4180.17	3932.31	3660.78	3591.69	4165.87	146.022	34
ENSMUSG00000000740	Rpl13	ribosomal protein L13						4819.75	4491.16	4171.06	4032.8	4016.46	4127.7	3769.22	3765.83	4149.25	126.07	35
ENSMUSG00000033307	Mif	macrophage migration inhibitory factor (glycosylation-inhibiting factor)						3878.28	3933.51	4025.89	3704.07	4353.97	4150.75	3963.09	3840.48	3981.25	70.6478	36
ENSMUSG00000001025	S100a6	S100 calcium binding protein A6 (calcyclin)						3650.79	3989.54	3922.59	3681.53	4265.83	4083.74	3847.59	4167.69	3951.16	77.8524	37
ENSMUSG00000071866	Ppia	peptidylprolyl isomerase A						3364.31	3714.16	3874.51	3620.7	4418.09	4141.78	4118.45	4182.36	3929.29	123.029	38
ENSMUSG00000047675	Rps8	ribosomal protein S8						4167.63	4197.86	4063.25	3824.87	3752.02	3738.62	3640.28	3900.79	3910.67	74.0563	39
ENSMUSG00000044533	Rps2	ribosomal protein S2						4612.07	4102.18	3841.84	3638.97	3706.25	3910.45	3613.89	3497.77	3865.43	126.151	40
ENSMUSG00000003970	Rpl8	ribosomal protein L8						4209.18	3993.16	3806.44	3656.29	3956.71	3889.17	3769.58	3621.15	3862.71	68.0596	41
ENSMUSG00000061787	Rps17	ribosomal protein S17						4398.29	3940.09	3724.32	3577.2	3457.8	3984.98	3850.26	3832.75	3845.71	100.99	42
ENSMUSG00000017404	Rpl19	ribosomal protein L19						3704.36	3718.6	3496.33	3427.94	3807.03	3686.71	3458.76	3425.99	3590.71	54.3182	43
ENSMUSG00000064356	mt-Atp8	mitochondrially encoded ATP synthase 8						2498.17	3717.72	4317.57	4465.88	4015.33	3009.53	2808.52	3697.72	3566.3	254.972	44
ENSMUSG00000020460	Rps27a	ribosomal protein S27A						4241.73	3684.44	3546.3	3239.26	3025.23	3668.07	3521.52	3586.75	3564.16	125.571	45
ENSMUSG00000009927	Rps25	ribosomal protein S25						4012.16	3752.19	3492.54	3309.09	2971.63	3272.21	3065.09	3154.53	3378.68	125.657	46
ENSMUSG00000057036	Gm7536	predicted gene 7536						4019.54	3633.13	3421.97	3348.41	3126.25	3322.61	3084.96	2991.21	3368.51	118.071	47
ENSMUSG00000029614	Rpl6	ribosomal protein L6						3652.72	3532.8	3332.94	3159.36	3234.24	3303.92	3136.23	3250.81	3325.38	63.7941	48
ENSMUSG00000100755	Rps23-ps1	ribosomal protein S23, pseudogene 1						3930.48	3519.35	3240.77	3206.08	3067.91	3438.81	3130.5	3031.24	3320.64	105.952	49
ENSMUSG00000068240	Gm11808	predicted gene 11808						3788.77	3512.57	3283.2	3266.32	3289.91	3150.89	2754.36	2523.43	3196.18	141.572	50
ENSMUSG00000046330	Rpl37a	ribosomal protein L37a						3630.75	3456.47	3199.22	3145.67	3048.99	3178.83	2946.97	2842.53	3181.18	91.2705	51
ENSMUSG00000098274	Rpl24	ribosomal protein L24						3758.58	3343.12	3294.21	3048.07	2734.67	3084.7	3014.25	3060.32	3167.24	106.88	52
ENSMUSG00000062825	Actg1	actin, gamma, cytoplasmic 1						2785.14	2859.26	3105.7	2901.49	3673.34	3356.32	3307.66	3285.16	3159.26	106.927	53
ENSMUSG00000037563	Rps16	ribosomal protein S16						3532.46	3431.15	3332.77	3039.34	2874	2985.13	2932.54	2957.32	3135.59	90.3449	54
ENSMUSG00000052146	Rps10	ribosomal protein S10						3620.45	3252.93	3097.55	2982.95	3045.58	3058.86	2776.45	2784.31	3077.39	95.6997	55
ENSMUSG00000073702	Rpl31	ribosomal protein L31						3302.81	3190.48	3168.44	2953.67	3096.25	2946.63	2759.85	2958.12	3047.03	61.5776	56
ENSMUSG00000058600	Rpl30	ribosomal protein L30						3586.79	3303.2	3177.1	2993.59	2597.41	2899.78	2727.89	2820.32	3013.26	115.318	57
ENSMUSG00000028495	Rps6	ribosomal protein S6						3567.19	3151.89	3005.88	2847.11	2750.78	2972.35	2814.14	2873.47	2997.85	92.7347	58
ENSMUSG00000064357	mt-Atp6	mitochondrially encoded ATP synthase 6						2756.02	2672.6	3347.28	2951.14	1702	3186.75	3830.71	3514.62	2995.14	230.067	59
ENSMUSG00000025362	Rps26	ribosomal protein S26						3570.6	3326.03	3164.87	2977.32	2741.84	2774.98	2655.1	2694.62	2988.17	118.619	60
ENSMUSG00000064358	mt-Co3	mitochondrially encoded cytochrome c oxidase III						3435.63	2342.19	2580.76	2387.23	2010.44	3859.45	3841.86	3443.92	2987.68	260.364	61
ENSMUSG00000031320	Rps4x	ribosomal protein S4, X-linked						3801.55	3066.53	2963.96	2699.51	2395.5	3012.66	2860.41	2874.46	2959.32	141.806	62
ENSMUSG00000078193	Gm2000	predicted gene 2000						3576.86	3276.05	2997.37	2962.4	2549.38	2851.69	2642.68	2781.24	2954.71	119.117	63
ENSMUSG00000025967	Eef1b2	eukaryotic translation elongation factor 1 beta 2						3581.92	2891.56	2818.89	2631.03	2491.79	3053.41	2982.56	2935.17	2923.29	114.789	64
ENSMUSG00000083773	Gm13394	predicted gene 13394						2513.97	2772.1	2756.05	2629.01	3215.24	3025.81	2970.7	2642.74	2815.7	83.3536	65
ENSMUSG00000090137	Uba52	ubiquitin A-52 residue ribosomal protein fusion product 1						3297.69	3081.42	2869.76	2733.34	2545.02	2677.3	2468.65	2667.24	2792.55	98.4922	66
ENSMUSG00000079641	Rpl39	ribosomal protein L39						3263.17	2933.03	2884.62	2677.76	2354.19	2707.61	2570.69	2712.15	2762.9	95.5162	67
ENSMUSG00000041841	Rpl37	ribosomal protein L37						2750.44	2904.4	2858.89	2830.18	3016.27	2430.36	2423.26	2428.45	2705.28	85.497	68
ENSMUSG00000012848	Rps5	ribosomal protein S5						3160.38	2860.38	2684.72	2582.65	2651.86	2628.53	2462.98	2436.56	2683.51	82.6464	69
ENSMUSG00000071415	Rpl23	ribosomal protein L23						2795.98	2682.2	2638.08	2502.7	2539.36	2635.81	2672.93	2794.68	2657.72	37.2282	70
ENSMUSG00000084319	Tpt1-ps3	tumor protein, translationally-controlled, pseudogene 3						3196.02	2702.44	2505.64	2495.7	2316.16	2896.39	2645.77	2486.62	2655.59	98.5752	71
ENSMUSG00000043716	Rpl7	ribosomal protein L7						2930.64	2695.65	2538.39	2423.86	2453.59	2751.05	2633.02	2640.12	2633.29	58.4596	72
ENSMUSG00000030432	Rpl28	ribosomal protein L28						2589.5	2869.05	2719.96	2702.2	2751.03	2324.63	2331.9	2511.69	2599.99	70.159	73
ENSMUSG00000040952	Rps19	ribosomal protein S19						3009.21	2855.6	2605.06	2481.69	2422.4	2657.88	2364.8	2356.23	2594.11	84.1095	74
ENSMUSG00000101249	Gm29216	predicted gene 29216						2210.68	2358.36	2707.47	3084.37	3153.19	2320.16	2470.15	2428.49	2591.61	125.795	75
ENSMUSG00000025508	Rplp2	ribosomal protein, large P2						2979.76	2722.46	2493.73	2416.22	2379.13	2656.51	2514.32	2410.85	2571.62	72.3257	76
ENSMUSG00000100862	Gm10925	predicted gene 10925						2426.63	2487.12	2227.4	2954.26	2964.88	2338.12	1849.07	2881.17	2516.08	139.864	77
ENSMUSG00000058603	Rpl28-ps1	ribosomal protein L28, pseudogene 1						2773.46	2687.18	2481.45	2463.76	2435.35	2596.03	2430.7	2259.57	2515.94	57.5469	78
ENSMUSG00000095597	Gm6472	predicted pseudogene 6472						2717.82	2823.91	2662.98	2576.25	2481.13	2337.59	2181.35	2333.19	2514.28	77.8287	79
ENSMUSG00000105703	Gm43305	predicted gene 43305						2756.76	2594.39	2731.76	2831.41	2003.54	2167.29	2443.59	2535.88	2508.08	103.466	80
ENSMUSG00000062647	Rpl7a	ribosomal protein L7A						2678.99	2569.6	2470.71	2346.86	2620.91	2534.8	2370.37	2363.48	2494.46	44.7646	81
ENSMUSG00000030695	Aldoa	aldolase A, fructose-bisphosphate						2197.09	2325.93	2402.26	2184.54	2741.96	2540.67	2640.99	2354.9	2423.54	71.4006	82
ENSMUSG00000008683	Rps15a	ribosomal protein S15A						2746.47	2654.99	2577.82	2497.42	2346.66	2323.75	2089.19	2092.5	2416.1	87.0059	83
ENSMUSG00000020372	Rack1	receptor for activated C kinase 1		Unclassified				2691.83	2436.61	2309.99	2202.06	2429.95	2528.52	2390.85	2293.76	2410.45	53.735	84
ENSMUSG00000041453	Rpl21	ribosomal protein L21						2721.49	2562.32	2444.88	2318.12	2249.2	2325.62	2216.86	2358.15	2399.58	60.0568	85
ENSMUSG00000067870	Rpl31-ps8	ribosomal protein L31, pseudogene 8						2536.13	2491.08	2156.03	2276.18	2198.57	2573.35	2418.81	2174.87	2353.13	60.6166	86
ENSMUSG00000087943	Gm24245	predicted gene, 24245						1845.01	2328.87	2480.44	3229.73	2905.57	1670.53	2436.6	1899.62	2349.55	190.257	87
ENSMUSG00000053332	Gas5	growth arrest specific 5						2729.06	2404.66	2195.87	2114.95	1930.16	2351.98	2342.29	2367.07	2304.51	82.9948	88
ENSMUSG00000032518	Rpsa	ribosomal protein SA						2545.86	2330.33	2217.65	2116.5	2315.47	2350.02	2248.03	2200.78	2290.58	45.5904	89
ENSMUSG00000037805	Rpl10a	ribosomal protein L10A						2512.74	2468.96	2318.32	2209.09	2248.91	2283.24	2137.14	1930.33	2263.59	65.174	90
ENSMUSG00000060938	Rpl26	ribosomal protein L26						2768.52	2427.01	2313.37	2163.75	2025.03	2189.6	2072.39	2126.49	2260.77	85.7509	91
ENSMUSG00000027907	S100a11	S100 calcium binding protein A11						2078.55	2123.19	2093.33	2107.83	2103.54	2248.72	2128.61	2296.23	2147.5	28.1919	92
ENSMUSG00000028936	Rpl22	ribosomal protein L22						2457.51	2264.56	2158.03	2007.41	1858.87	2113.33	2126.32	2130.25	2139.53	61.855	93
ENSMUSG00000024661	Fth1	ferritin heavy polypeptide 1						2360.33	2141.82	2192.7	2047.87	1871.22	1957.78	1922.09	1857.73	2043.94	62.4793	94
ENSMUSG00000028234	Rps20	ribosomal protein S20						2450.79	2228.58	2127.02	1948.78	1849.4	1952.12	1868.11	1925.78	2043.82	74.009	95
ENSMUSG00000006333	Rps9	ribosomal protein S9						2300.76	2142.69	2048.83	1967.71	2041.51	1967.75	1917.71	1883.22	2033.77	47.863	96
ENSMUSG00000029580	Actb	actin, beta						1820.05	1783.76	1852.9	1806.53	2030.29	2296.86	2329.42	2131.19	2006.37	79.3568	97
ENSMUSG00000058443	Rpl10-ps3	ribosomal protein L10, pseudogene 3						2340.77	2107.47	2020.43	1930.45	1771.18	1977.46	1874.9	1965	1998.46	60.1567	98
ENSMUSG00000062382	Ftl1-ps1	ferritin light polypeptide 1, pseudogene 1						2054.06	1950.71	2040.6	1896.75	2049.46	1819.7	1822.95	1776.73	1926.37	40.1873	99
ENSMUSG00000015656	Hspa8	heat shock protein 8						1796.64	1882.37	1860.73	1824.35	1919.14	2046.54	2019.51	2023.66	1921.62	34.3138	100
ENSMUSG00000035530	Eif1	eukaryotic translation initiation factor 1						1782.7	1850.38	1850.63	1831.41	1881.43	2012.09	1970.28	2145.3	1915.53	42.1432	101
ENSMUSG00000090862	Rps13	ribosomal protein S13						2236.7	2119.86	2026.22	1907.3	1698.84	1815.19	1726.88	1768.14	1912.39	69.6266	102
ENSMUSG00000062997	Rpl35	ribosomal protein L35						2226.09	2200.16	2019.08	1883.02	1808.98	1825.14	1643.48	1587.61	1899.2	83.2565	103
ENSMUSG00000083061	Gm12191	predicted gene 12191						2310.49	2024.8	1893.16	1778.86	1575.9	1848.31	1785.24	1757.22	1871.75	77.1915	104
ENSMUSG00000060036	Rpl3	ribosomal protein L3						2010.4	1871.67	1815.59	1731	1883.68	1882.53	1772.31	1745.44	1839.08	32.6641	105
ENSMUSG00000030744	Rps3	ribosomal protein S3						2078.42	1922.93	1836.2	1649.77	1772.38	1875.59	1735.15	1654.94	1815.67	51.1067	106
ENSMUSG00000090841	Myl6	myosin, light polypeptide 6, alkali, smooth muscle and non-muscle						1588.9	1679.73	1707.49	1619.33	2072.94	1876.55	1802.56	1771.5	1764.87	55.3446	107
ENSMUSG00000079435	Rpl36a	ribosomal protein L36A						2105.75	1792.63	1793.66	1614.58	1625.84	1754.88	1667.87	1731.88	1760.89	55.1268	108
ENSMUSG00000026238	Ptma	prothymosin alpha						1504.89	1622.81	1675.72	1668.78	1861.86	1772.62	1934.16	1943.28	1748.02	55.5225	109
ENSMUSG00000062933	Gm10123	predicted pseudogene 10123						1647.44	1573.02	1602.95	1588.42	1751.95	2017.57	1906.94	1888.22	1747.06	60.479	110
ENSMUSG00000057113	Npm1	nucleophosmin 1						1748.22	1724.04	1699.69	1568.69	1663.8	1775.26	1843.44	1949.61	1746.59	40.6713	111
ENSMUSG00000032399	Rpl4	ribosomal protein L4						1780.35	1722.08	1709.21	1658.48	1788.03	1779.95	1765.16	1752.58	1744.48	15.8549	112
ENSMUSG00000012405	Rpl15	ribosomal protein L15						1911.76	1833.25	1745.2	1667.91	1619.52	1642.57	1639.11	1817.29	1734.58	38.5785	113
ENSMUSG00000003429	Rps11	ribosomal protein S11						2010.49	1806.47	1740.46	1608.47	1524.61	1740.75	1641.09	1626.96	1712.41	53.075	114
ENSMUSG00000086841	2410006H16Rik	RIKEN cDNA 2410006H16 gene						1946.47	1768.79	1671.53	1582.06	1691.51	1756.87	1612.19	1601.67	1703.89	42.419	115
ENSMUSG00000062070	Pgk1	phosphoglycerate kinase 1		Unclassified				1670.88	1619.8	1651.34	1472.18	1726.76	1758	1813.26	1778.95	1686.39	38.5471	116
ENSMUSG00000003955	Fam162a	family with sequence similarity 162, member A						1718.62	1592.87	1695	1485.29	1661.88	1797.31	1733.72	1681.81	1670.81	33.6795	117
ENSMUSG00000025794	Rpl14	ribosomal protein L14						2038.72	1742.04	1660.92	1530.84	1457.38	1619.67	1605.16	1577.17	1653.99	62.5501	118
ENSMUSG00000059070	Rpl18	ribosomal protein L18						1773.13	1742.03	1635.24	1589.11	1654	1645.85	1589.79	1506.85	1642	30.2352	119
ENSMUSG00000049517	Rps23	ribosomal protein S23						1863.62	1696.29	1722.24	1566.89	1447.93	1619.21	1537.32	1647.54	1637.63	44.9527	120
ENSMUSG00000081604	Gm11518	predicted gene 11518						1834.54	1696.8	1520.06	1560.42	1476.94	1707.28	1571.66	1602.83	1621.32	41.4393	121
ENSMUSG00000060419	Rps16-ps2	ribosomal protein S16, pseudogene 2						1724.96	1740.21	1556.94	1631.84	1725.53	1442.68	1309.56	1225.67	1544.67	70.5391	122
ENSMUSG00000061315	Naca	nascent polypeptide-associated complex alpha polypeptide						1551.41	1494.58	1482.22	1394.04	1486.18	1575.5	1593.03	1626.4	1525.42	26.5819	123
ENSMUSG00000034994	Eef2	eukaryotic translation elongation factor 2						1407.72	1480.81	1450.83	1485.89	1643.7	1509.74	1509.4	1455.9	1493	24.5983	124
ENSMUSG00000064354	mt-Co2	mitochondrially encoded cytochrome c oxidase II						1688.91	1192.84	1514.16	1309.44	717.605	2188.64	1845.03	1472.65	1491.16	156.529	125
ENSMUSG00000064341	mt-Nd1	mitochondrially encoded NADH dehydrogenase 1						1370.89	1387.86	1444.59	1533.59	1135.84	1551.26	1641.48	1823.03	1486.07	72.1472	126
ENSMUSG00000008348	Ubc	ubiquitin C						1357.78	1366.7	1357.93	1440.67	1452.82	1576.4	1624.05	1620.64	1474.62	41.0912	127
ENSMUSG00000071528	Usmg5	upregulated during skeletal muscle growth 5						1627.99	1427.28	1404.64	1335.25	1224.8	1559.81	1468.83	1398.03	1430.83	44.3827	128
ENSMUSG00000063229	Ldha	lactate dehydrogenase A						1255.09	1311.71	1339.83	1259.55	1662.88	1537.62	1579.62	1459.89	1425.77	55.2143	129
ENSMUSG00000011752	Pgam1	phosphoglycerate mutase 1						1201.46	1286.69	1358.41	1282.46	1535.18	1509.17	1586.3	1508.88	1408.57	50.7041	130
ENSMUSG00000023456	Tpi1	triosephosphate isomerase 1						1219.01	1269.58	1305.47	1238.46	1501.27	1515.95	1573.22	1386.79	1376.22	48.9447	131
ENSMUSG00000048758	Rpl29	ribosomal protein L29						1501.48	1320.3	1262.1	1206.31	1152.36	1315.63	1209.94	1186.18	1269.29	39.3664	132
ENSMUSG00000062006	Rpl34	ribosomal protein L34						1689.65	1302.52	1197.28	1172.37	969.489	1326.49	1218.46	1212.78	1261.13	72.0593	133
ENSMUSG00000078636	Gm7336	predicted gene 7336						1134.53	1144.17	1201.25	1108.81	1286.11	1414.76	1474.74	1313.19	1259.7	48.0037	134
ENSMUSG00000107176	Gm9794	predicted pseudogene 9794						1403.72	1273.77	1174.32	1128.48	1065.2	1349.71	1365.91	1097.03	1232.27	46.8858	135
ENSMUSG00000032294	Pkm	pyruvate kinase, muscle		Unclassified				1079.38	1186.31	1197.02	1197.91	1408.13	1246.05	1329.34	1184.29	1228.56	35.5172	136
ENSMUSG00000059291	Rpl11	ribosomal protein L11						1256.25	1269.6	1244.97	1187.98	1326.2	1198.66	1138.57	1094.05	1214.53	26.5293	137
ENSMUSG00000039221	Rpl22l1	ribosomal protein L22 like 1						1487.85	1181.53	1235.51	1019.47	783.542	1353.26	1305.05	1264.66	1203.86	76.6575	138
ENSMUSG00000023175	Bsg	basigin						1062.84	1146.49	1163.67	1152.13	1404.11	1212.26	1277.71	1172.39	1198.95	36.3247	139
ENSMUSG00000060802	B2m	beta-2 microglobulin						1014.09	1156.03	1148.1	1181.48	1106.09	1169.33	1142.83	1272.49	1148.8	25.6513	140
ENSMUSG00000037894	H2afz	H2A histone family, member Z						1023.44	1094.07	1148.59	1043.97	1187.33	1159.11	1187.2	1173.64	1127.17	23.0056	141
ENSMUSG00000065947	mt-Nd4l	mitochondrially encoded NADH dehydrogenase 4L						998.1	1072.54	1216.42	1265.87	808.183	1147	1116.26	1265.87	1111.28	54.4993	142
ENSMUSG00000063316	Rpl27	ribosomal protein L27						1368.88	1199.18	1138.4	1052.44	915.72	1144.82	1034.71	1020.23	1109.3	48.5086	143
ENSMUSG00000031765	Mt1	metallothionein 1						1118.65	1139.61	1159.47	1103.85	1199.04	1061.1	983.356	1047.01	1101.51	24.3432	144
ENSMUSG00000064370	mt-Cytb	mitochondrially encoded cytochrome b						984.442	998.425	1170.1	1304.62	874.53	1107.85	1091.61	1271.32	1100.36	51.8879	145
ENSMUSG00000082062	Ftl2-ps	ferritin light polypeptide 2, pseudogene						1264.19	1084.74	1088.12	1013.17	978.049	1113.03	1086.64	946.343	1071.79	34.6754	146
ENSMUSG00000041697	Cox6a1	cytochrome c oxidase subunit 6A1						1056.76	1014.57	1028.91	977.346	1179.56	1118.49	1045.62	1031.35	1056.58	22.5685	147
ENSMUSG00000105388	Rpl36a-ps2	ribosomal protein L36A, pseudogene 2						1290.25	998.155	914.968	1062.66	914.173	1176.11	1021.61	1042.94	1052.61	45.1099	148
ENSMUSG00000105987	AI506816	expressed sequence AI506816						1122.13	1166.88	1148.73	1111.24	885.39	922.633	1007.53	1050.14	1051.84	37.1912	149
ENSMUSG00000019505	Ubb	ubiquitin B						923.824	1011.18	1001.65	1013.28	1238.05	1059.14	1045.05	1022.08	1039.28	31.7478	150
ENSMUSG00000022283	Pabpc1	poly(A) binding protein, cytoplasmic 1						957.438	1050.86	1041.55	1073.76	964.901	1031.64	1095.93	1056.13	1034.02	17.366	151
ENSMUSG00000101111	Gm28437	predicted gene 28437						342.348	1364.28	1449.86	1806.62	1643.84	270.474	205.675	1109.08	1024.02	231.578	152
ENSMUSG00000031818	Cox4i1	cytochrome c oxidase subunit 4I1						1012.57	1004.15	996.658	974.8	1121.33	1057.18	1037.11	983.467	1023.41	16.9444	153
ENSMUSG00000014313	Cox6c	cytochrome c oxidase subunit 6C						1093.82	1020.05	1001.43	968.811	960.332	1062.75	991.274	1018.96	1014.68	16.0373	154
ENSMUSG00000005054	Cstb	cystatin B						1069.3	978.776	967.03	882.494	941.881	1060.88	1004.74	1012.95	989.756	21.7872	155
ENSMUSG00000071644	Eef1g	eukaryotic translation elongation factor 1 gamma						1072.02	987.754	956.127	935.979	986.28	991.095	987.378	972.091	986.09	14.0268	156
ENSMUSG00000035885	Cox8a	cytochrome c oxidase subunit 8A						992.117	978.526	1030.13	976.333	1055.1	969.241	946.938	897.711	980.762	17.0561	157
ENSMUSG00000105263	Gm42427	predicted gene 42427						1051.64	986.538	1063.52	1089.86	826.524	854.625	948.242	991.82	976.596	33.951	158
ENSMUSG00000016252	Atp5e	ATP synthase, H+ transporting, mitochondrial F1 complex, epsilon subunit						1027.08	1064.12	1010.04	961.691	955.462	977.051	870.013	877.873	967.918	24.0912	159
ENSMUSG00000049751	Rpl36al	ribosomal protein L36A-like						1022.47	982.78	920.579	869.819	937.203	999.819	976.381	970.605	959.957	17.2141	160
ENSMUSG00000061477	Rps7	ribosomal protein S7						1175.59	1013.74	959.985	897.869	756.087	1003.05	959.602	894.073	957.499	42.4597	161
ENSMUSG00000056608	Chd9	chromodomain helicase DNA binding protein 9						1010.29	981.042	1051.49	1083.31	735.969	806.483	961.72	1002.31	954.077	42.6402	162
ENSMUSG00000072692	Rpl37rt	ribosomal protein L37, retrotransposed						907.745	1137.56	984.402	932.956	975.866	1010.76	906.124	770.187	953.2	37.075	163
ENSMUSG00000044894	Uqcrq	ubiquinol-cytochrome c reductase, complex III subunit VII						1026.75	935.42	905.049	928.242	936.778	999.215	921.884	916.875	946.277	15.2194	164
ENSMUSG00000072940	Gm10443	predicted pseudogene 10443						1018.07	1167.19	835.804	986.571	790.008	986.255	817.814	950.709	944.053	44.3778	165
ENSMUSG00000018293	Pfn1	profilin 1						855.121	901.109	904.241	913.004	936.174	986.246	974.815	932.001	925.339	14.9011	166
ENSMUSG00000023944	Hsp90ab1	heat shock protein 90 alpha (cytosolic), class B member 1						864.444	908.406	909.68	930.15	953.906	907.752	946.796	963.419	923.069	11.3844	167
ENSMUSG00000041959	S100a10	S100 calcium binding protein A10 (calpactin)						951.283	912.645	871.47	857.753	860.073	999.482	929.666	918.975	912.669	17.3389	168
ENSMUSG00000063524	Eno1	enolase 1, alpha non-neuron						827.276	870.578	918.399	859.445	1001.82	940.682	946.763	897.665	907.829	19.7587	169
ENSMUSG00000064337	mt-Rnr1	mitochondrially encoded 12S rRNA						919.848	889.328	892.695	831.882	740.78	902.185	1014.16	1058.6	906.184	34.9582	170
ENSMUSG00000021270	Hsp90aa1	heat shock protein 90, alpha (cytosolic), class A member 1						738.241	850.041	820.638	883.147	909.253	970.672	1027.36	1048.84	906.024	37.4185	171
ENSMUSG00000032231	Anxa2	annexin A2						774.845	813.539	830.963	787.852	1035.5	999.631	998.595	982.761	902.96	39.0212	172
ENSMUSG00000031762	Mt2	metallothionein 2						931.24	877.609	923.753	895.15	935.615	864.596	856.572	933.636	902.272	11.6212	173
ENSMUSG00000096768	Gm47283	predicted gene, 47283						670.327	797.534	929.063	1042.02	1225.13	818.384	888.373	837.209	901.006	59.8668	174
ENSMUSG00000064363	mt-Nd4	mitochondrially encoded NADH dehydrogenase 4						872.556	847.561	933.428	955.425	587.995	906.322	928.272	1093.88	890.679	50.4925	175
ENSMUSG00000023043	Krt18	keratin 18						858.054	889.6	869.39	859.064	954.687	927.584	881.779	870.769	888.866	12.2668	176
ENSMUSG00000023004	Tuba1b	tubulin, alpha 1B						827.073	850.38	866.123	869.017	960.987	908.363	872.963	860.522	876.929	14.4597	177
ENSMUSG00000064345	mt-Nd2	mitochondrially encoded NADH dehydrogenase 2						833.25	862.193	872.242	927.627	639.625	883.521	934.622	1059.18	876.532	41.751	178
ENSMUSG00000056201	Cfl1	cofilin 1, non-muscle						769.702	828	874.955	854.574	999.185	910.129	883.528	878.26	874.792	23.3196	179
ENSMUSG00000025393	Atp5b	ATP synthase, H+ transporting mitochondrial F1 complex, beta subunit						688.239	845.919	870.197	891.653	1052.01	832.709	852.003	826.056	857.349	35.2492	180
ENSMUSG00000026822	Lcn2	lipocalin 2						714.567	767.502	862.848	976.593	953.231	767.906	851.937	819.168	839.219	32.3926	181
ENSMUSG00000022982	Sod1	superoxide dismutase 1, soluble						827.364	806.677	815.94	803.208	900.202	828.56	810.711	799.645	824.038	11.4999	182
ENSMUSG00000029304	Spp1	secreted phosphoprotein 1						703.349	682.048	767.59	827.495	874.53	861.118	903.283	934.719	819.266	32.7865	183
ENSMUSG00000110720	Gm46223	predicted gene, 46223						1116.13	785.191	779.677	762.487	414.952	863.446	864.304	962.159	818.543	70.9557	184
ENSMUSG00000046364	Rpl27a	ribosomal protein L27A						945.581	885.195	865.839	784.34	760.19	762.278	747.816	789.057	817.537	25.503	185
ENSMUSG00000064339	mt-Rnr2	mitochondrially encoded 16S rRNA						708.575	765.699	756.826	749.711	653.535	806.641	897.249	1049.42	798.457	43.7264	186
ENSMUSG00000021290	Atp5mpl	ATP synthase membrane subunit 6.8PL						970.958	816.047	796.458	711.477	632.495	908.728	787.936	757.636	797.717	37.586	187
ENSMUSG00000016559	H3f3b	H3 histone, family 3B						640.593	718.978	831.95	777.931	990.623	783.235	789.195	826.133	794.83	35.5284	188
ENSMUSG00000055762	Eef1d	eukaryotic translation elongation factor 1 delta (guanine nucleotide exchange protein)						836.636	783.471	761.866	752.215	795.686	785.533	782.093	773.821	783.915	8.98134	189
ENSMUSG00000060803	Gstp1	glutathione S-transferase, pi 1						712.281	725.686	723.657	721.545	851.911	825.743	854.698	835.188	781.339	23.1464	190
ENSMUSG00000022884	Eif4a2	eukaryotic translation initiation factor 4A2						721.597	716.379	756.008	716.228	722.468	850.006	880.717	885.35	781.094	27.2373	191
ENSMUSG00000021660	Btf3	basic transcription factor 3						820.142	778.931	762.355	696.369	714.239	844.721	812.17	812.447	780.172	18.6696	192
ENSMUSG00000025351	Cd63	CD63 antigen						703.901	710.858	737.929	722.48	823.125	816.838	875.146	818.941	776.152	22.8808	193
ENSMUSG00000050856	Atp5k	ATP synthase, H+ transporting, mitochondrial F1F0 complex, subunit E						756.89	829.748	776.325	792.143	819.081	744.478	743.603	729.217	773.935	13.0715	194
ENSMUSG00000094497	Gm8210	predicted pseudogene 8210						909.521	837.343	752.832	718.391	650.71	804.928	775.786	725.67	771.898	28.1511	195
ENSMUSG00000017723	Wfdc2	WAP four-disulfide core domain 2						685.153	745.76	733.051	759.465	893.531	796.137	760.656	775.468	768.653	21.2588	196
ENSMUSG00000068523	Gng5	guanine nucleotide binding protein (G protein), gamma 5						825.352	768.606	809.566	767.384	690.884	762.717	733.431	780.46	767.3	14.8438	197
ENSMUSG00000066724	Gm10175	predicted gene 10175						790.596	780.816	771.007	731.233	825.166	760.847	711.786	700.644	759.012	14.8838	198
ENSMUSG00000098234	Snhg6	small nucleolar RNA host gene 6						927.054	750.912	754.724	721.512	580.32	740.787	709.591	734.695	739.949	33.3054	199
ENSMUSG00000020857	Nme2	NME/NM23 nucleoside diphosphate kinase 2		Unclassified				823.478	765.911	734.891	679.612	707.966	736.436	720.411	694.332	732.88	16.0442	200
ENSMUSG00000064215	Ifi27	interferon, alpha-inducible protein 27						625.955	679.463	696.496	695.178	809.992	801.959	786.278	753.553	731.109	23.5294	201
ENSMUSG00000017778	Cox7c	cytochrome c oxidase subunit 7C						833.215	768.739	719.162	653.286	609.321	794.271	732.587	720.309	728.861	25.6839	202
ENSMUSG00000022587	Ly6e	lymphocyte antigen 6 complex, locus E						652.181	690.29	675.946	757.273	718.708	774.806	767.888	782.908	727.5	17.7373	203
ENSMUSG00000022312	Eif3h	eukaryotic translation initiation factor 3, subunit H						758.652	742.835	717.869	685.926	757.57	716.238	705.864	715.388	725.043	9.0872	204
ENSMUSG00000064360	mt-Nd3	mitochondrially encoded NADH dehydrogenase 3						808.145	438.891	786.529	694.513	573.419	930.575	753.653	792.443	722.271	54.122	205
ENSMUSG00000070493	Chchd2	coiled-coil-helix-coiled-coil-helix domain containing 2						671.805	684.314	706.545	696.872	809.692	730.545	708.411	716.337	715.565	14.9154	206
ENSMUSG00000046434	Hnrnpa1	heterogeneous nuclear ribonucleoprotein A1						661.493	686.084	692.686	703.825	708.592	711.815	759.105	762.987	710.823	12.3068	207
ENSMUSG00000108414	Snhg1	small nucleolar RNA host gene 1						749.002	728.055	693.174	660.48	607.846	774.224	720.955	733.709	708.431	18.806	208
ENSMUSG00000075706	Gpx4	glutathione peroxidase 4						696.662	692.644	703.221	703.167	782.011	727.551	694.723	658.088	707.259	12.6305	209
ENSMUSG00000060743	H3f3a	H3 histone, family 3A						599.862	649.704	710.277	661.723	764.961	737.008	757.258	766.324	705.889	22.0054	210
ENSMUSG00000028639	Ybx1	Y box protein 1	CSD					739.171	710.707	688.032	668.898	670.153	708.396	695.922	691.98	696.657	8.14219	211
ENSMUSG00000001289	Pfdn5	prefoldin 5						770.59	690.619	673.433	627.788	689.265	738.227	696.106	633.19	689.903	17.0246	212
ENSMUSG00000098178	Gm42418	predicted gene, 42418						558.216	605.099	680.152	808.593	793.053	636.655	796.029	632.584	688.797	34.5194	213
ENSMUSG00000078566	Bnip3	BCL2/adenovirus E1B interacting protein 3						602.07	639.026	682.052	591.27	735.759	736.212	741.171	724.423	681.498	22.1986	214
ENSMUSG00000090136	Gm10177	predicted gene 10177						773.982	690.489	663.66	634.729	564.812	702.793	670.782	688.376	673.703	21.0801	215
ENSMUSG00000074578	Zfas1	zinc finger, NFX1-type containing 1, antisense RNA 1						819.193	716.542	688.103	641.612	588.955	670.482	617.273	616.342	669.813	25.9759	216
ENSMUSG00000022841	Ap2m1	adaptor-related protein complex 2, mu 1 subunit						585.856	619.023	635.977	679.625	766.885	690.156	694.719	682.232	669.309	19.5844	217
ENSMUSG00000106037	Gm4332	predicted gene 4332						656.494	851.702	684.597	795.377	661.591	661.62	546.071	479.377	667.104	42.4475	218
ENSMUSG00000090553	Snrpe	small nuclear ribonucleoprotein E						738.156	686.588	681.438	628.778	574.755	683.48	645.318	675.518	664.254	17.1022	219
ENSMUSG00000020267	Hint1	histidine triad nucleotide binding protein 1						630.489	632.39	664.454	632.149	681.59	687.715	647.589	673.03	656.176	8.31286	220
ENSMUSG00000078812	Eif5a	eukaryotic translation initiation factor 5A						556.432	588.775	633.107	617.436	715.441	696.978	710.105	687.964	650.78	21.2921	221
ENSMUSG00000029447	Cct6a	chaperonin containing Tcp1, subunit 6a (zeta)						538.32	563.185	576.102	568.575	646.246	758.3	778.629	748.243	647.2	35.3497	222
ENSMUSG00000070343	Gm10288	predicted gene 10288						710.842	690.408	594.038	587.152	539.79	672.898	678.22	663.57	642.115	21.3683	223
ENSMUSG00000049382	Krt8	keratin 8						572.387	611.011	613.712	622.565	737.832	661.547	670.675	631.549	640.16	17.6547	224
ENSMUSG00000036781	Rps27l	ribosomal protein S27-like						716.486	663.67	634.267	611.539	526.25	670.083	585.196	642.003	631.187	20.478	225
ENSMUSG00000009013	Dynll1	dynein light chain LC8-type 1						594.331	633.453	659.99	609.69	619.903	605.596	566.316	593.906	610.398	9.98052	226
ENSMUSG00000031799	Tpm4	tropomyosin 4						501.837	548.905	564.774	548.994	648.159	649.212	662.201	672.537	599.577	23.1298	227
ENSMUSG00000056851	Pcbp2	poly(rC) binding protein 2						578.805	593.295	627.635	598.618	599.569	577.762	624.295	593.437	599.177	6.52244	228
ENSMUSG00000055839	Elob	elongin B						619.946	611.25	597.178	539.815	614.654	635.455	587.895	579.648	598.23	10.4898	229
ENSMUSG00000022354	Ndufb9	NADH:ubiquinone oxidoreductase subunit B9						588.762	577.56	576.372	550.014	612.284	639.444	620.037	610.342	596.852	10.1968	230
ENSMUSG00000004980	Hnrnpa2b1	heterogeneous nuclear ribonucleoprotein A2/B1						543.721	565.183	619.478	648.353	562.967	559.41	604.912	664.777	596.1	15.932	231
ENSMUSG00000029484	Anxa3	annexin A3						501.629	531.675	542.304	567.449	615.324	665.814	647.048	688.144	594.923	24.3034	232
ENSMUSG00000042079	Hnrnpf	heterogeneous nuclear ribonucleoprotein F						492.709	532.029	588.681	591.48	576.313	601.823	637.83	633.253	581.765	17.3067	233
ENSMUSG00000059796	Eif4a1	eukaryotic translation initiation factor 4A1						484.715	519.199	536.875	558.436	600.516	638.639	631.177	642.211	576.471	21.2761	234
ENSMUSG00000038690	Atp5j2	ATP synthase, H+ transporting, mitochondrial F0 complex, subunit F2						566.2	612.022	570.152	561.745	631.228	598.498	542.239	524.78	575.858	12.6423	235
ENSMUSG00000059534	Uqcr10	ubiquinol-cytochrome c reductase, complex III subunit X						575.026	587.849	606.165	544.996	623.21	550.83	544.054	529.218	570.169	11.8109	236
ENSMUSG00000034566	Atp5h	ATP synthase, H+ transporting, mitochondrial F0 complex, subunit D						570.994	553.364	540.058	536.286	572.933	592.038	573.319	583.1	565.262	7.08137	237
ENSMUSG00000074884	Serf2	small EDRK-rich factor 2						614.027	571.403	546.89	533.304	580.908	565.944	553.006	549.951	564.429	8.86295	238
ENSMUSG00000094777	Hist1h2ap	histone cluster 1, H2ap						470.995	605.279	565.887	563.758	716.254	585.744	485.519	510.972	563.051	27.7024	239
ENSMUSG00000020849	Ywhae	tyrosine 3-monooxygenase/tryptophan 5-monooxygenase activation protein, epsilon polypeptide						474.404	508.987	542.126	526.354	558.328	620.882	620.163	605.96	557.15	19.2525	240
ENSMUSG00000046516	Cox17	cytochrome c oxidase assembly protein 17, copper chaperone						619.981	584.084	559.337	544	482.657	565.775	548.829	546.599	556.408	13.791	241
ENSMUSG00000054452	Aes	amino-terminal enhancer of split						532.563	577.282	553.108	573.814	611.886	532.783	538.258	514.958	554.332	11.154	242
ENSMUSG00000036751	Cox6b1	cytochrome c oxidase, subunit 6B1						546.953	567.832	547.121	558.554	603.761	538.942	512.374	544.645	552.523	9.27229	243
ENSMUSG00000027523	Gnas	GNAS (guanine nucleotide binding protein, alpha stimulating) complex locus						534.305	557.488	569.437	551.11	559.002	550.372	553.304	540.479	551.937	3.8595	244
ENSMUSG00000006304	Arpc2	actin related protein 2/3 complex, subunit 2						555.044	521.992	531.099	505.79	516.605	593.804	578.012	596.251	549.825	12.7331	245
ENSMUSG00000092203	1110038B12Rik	RIKEN cDNA 1110038B12 gene						652.87	564.835	539.029	525.687	489.952	550.855	524.495	533.651	547.672	16.9002	246
ENSMUSG00000020911	Krt19	keratin 19						495.709	530.237	511.417	514.283	587.525	578.553	597.133	542.669	544.691	13.6117	247
ENSMUSG00000061904	Slc25a3	solute carrier family 25 (mitochondrial carrier, phosphate carrier), member 3			Solute carriers			555.814	529.635	542.55	537.883	539.531	546.04	551.652	539.793	542.862	2.91387	248
ENSMUSG00000029632	Ndufa4	Ndufa4, mitochondrial complex associated						559.753	531.644	546.28	521.536	486.037	578.325	542.575	556.461	540.327	9.90851	249
ENSMUSG00000035242	Oaz1	ornithine decarboxylase antizyme 1						491.348	516.737	521.132	532.168	586.869	561.661	585.14	516.507	538.945	12.3723	250
ENSMUSG00000020738	Sumo2	small ubiquitin-like modifier 2						514.035	492.622	515.657	463.211	479.977	597.513	604.84	641.35	538.651	23.4445	251
ENSMUSG00000006728	Cdk4	cyclin-dependent kinase 4		Cyclin dependent kinases				439.232	535.779	527.371	560.352	673.096	534.843	510.757	504.301	535.716	23.326	252
ENSMUSG00000061983	Rps12	ribosomal protein S12						656.289	596.04	559.033	500.507	444.769	508.46	484.714	522.479	534.036	23.8029	253
ENSMUSG00000024048	Myl12a	myosin, light chain 12A, regulatory, non-sarcomeric						463.369	479.572	505.651	466.179	571.325	594.597	592.216	582.604	531.939	20.761	254
ENSMUSG00000020358	Hnrnpab	heterogeneous nuclear ribonucleoprotein A/B						438.373	500.652	513.617	554.793	529.107	549.934	579.525	563.401	528.675	15.8634	255
ENSMUSG00000029713	Gnb2	guanine nucleotide binding protein (G protein), beta 2						492.02	520.111	500.781	490.567	562.136	559.336	553.218	495.301	521.684	11.2059	256
ENSMUSG00000020163	Uqcr11	ubiquinol-cytochrome c reductase, complex III subunit XI						493.141	518.524	516.42	517.012	576.006	554.097	489.322	500.045	520.571	10.6749	257
ENSMUSG00000046718	Bst2	bone marrow stromal cell antigen 2						477.304	543.319	497.355	539.128	574.162	506.652	519.085	496.819	519.228	11.0925	258
ENSMUSG00000029430	Ran	RAN, member RAS oncogene family						423.138	512.43	532.286	528.514	670.686	472.688	467.182	507.269	514.274	25.8074	259
ENSMUSG00000054428	Atpif1	ATPase inhibitory factor 1						534.779	512.771	517.119	505.527	565.141	493.312	487.446	490.877	513.371	9.25328	260
ENSMUSG00000001525	Tubb5	tubulin, beta 5 class I						488.314	502.398	514.198	520.779	570.635	506.394	506.01	493.506	512.779	9.04129	261
ENSMUSG00000032060	Cryab	crystallin, alpha B						469.945	472.607	494.486	486.032	544.347	503.585	560.623	533.29	508.115	12.0381	262
ENSMUSG00000029372	Ppbp	pro-platelet basic protein						429.668	433.265	450.606	424.263	528.321	600.053	603.92	578.956	506.132	28.3855	263
ENSMUSG00000061232	H2-K1	histocompatibility 2, K1, K region						397.315	503.083	529.303	623.275	625.047	432.48	451.319	477.219	504.88	29.7319	264
ENSMUSG00000018567	Gabarap	gamma-aminobutyric acid receptor associated protein						505.143	480.006	491.987	469.307	496.18	521.01	526.45	527.662	502.218	7.69264	265
ENSMUSG00000024208	Uqcc2	ubiquinol-cytochrome c reductase complex assembly factor 2						481.438	493.394	487.915	477.144	520.734	527.36	493.953	473.405	494.418	6.98176	266
ENSMUSG00000054312	Mrps21	mitochondrial ribosomal protein S21						516.564	504.654	492.63	469.421	497.056	495.746	473.941	487.559	492.196	5.44261	267
ENSMUSG00000046721	Rpl14-ps1	ribosomal protein L14, pseudogene 1						610.527	529.987	469.44	484.564	358.992	504.421	511.189	451.028	490.018	25.3253	268
ENSMUSG00000042406	Atf4	activating transcription factor 4	TF_bZIP					402.643	444.705	462.667	470.158	555.41	502.993	544.227	529.221	489.003	18.7759	269
ENSMUSG00000040385	Ppp1ca	protein phosphatase 1 catalytic subunit alpha						451.096	465.936	476.519	469.141	543.575	504.914	512.23	482.525	488.242	10.6297	270
ENSMUSG00000037072	Selenof	selenoprotein F						421.91	451.523	480.558	459.258	498.78	525.416	519.72	543.387	487.569	14.7409	271
ENSMUSG00000028691	Prdx1	peroxiredoxin 1						441.036	441.388	459.054	424.381	463.806	550.374	527.851	534.742	480.329	17.4446	272
ENSMUSG00000041881	Ndufa7	NADH:ubiquinone oxidoreductase subunit A7						485.069	485.152	484.553	456.074	530.231	473.967	447.114	448.779	476.367	9.59512	273
ENSMUSG00000104960	Snhg8	small nucleolar RNA host gene 8						560.28	515.321	472.129	429.885	415.208	466.81	466.355	461.259	473.406	16.2719	274
ENSMUSG00000036371	Serbp1	serpine1 mRNA binding protein 1						409.619	446.078	447.367	464.927	476.614	488.115	515.873	507.944	469.567	12.4431	275
ENSMUSG00000018770	Atp5g3	ATP synthase, H+ transporting, mitochondrial F0 complex, subunit C3 (subunit 9)						470.726	428.016	477.502	423.9	459.33	501.092	489.556	498.336	468.557	10.517	276
ENSMUSG00000024659	Anxa1	annexin A1						435.22	434.908	446.699	436.374	430.689	535.443	504.569	509.04	466.618	14.9824	277
ENSMUSG00000015932	Dstn	destrin						382.542	411.413	440.669	400.708	507.686	515.59	528.356	541.942	466.113	22.6392	278
ENSMUSG00000117098	Myl12b	Myosin regulatory light chain 12B						399.688	450.029	421.552	438.393	588.723	487.054	459.541	452.974	462.244	20.263	279
ENSMUSG00000032959	Pebp1	phosphatidylethanolamine binding protein 1						396.275	445.801	438.776	441.914	520.203	493.248	481.459	475.374	461.631	13.6575	280
ENSMUSG00000038717	Atp5l	ATP synthase, H+ transporting, mitochondrial F0 complex, subunit G						483.262	479.691	462.358	439.687	455.828	454.79	432.257	477.938	460.726	6.6531	281
ENSMUSG00000029390	Tmed2	transmembrane p24 trafficking protein 2						386.592	396.074	419.822	429.852	452.162	507.535	497.055	508.719	449.726	17.5365	282
ENSMUSG00000068739	Sars	seryl-aminoacyl-tRNA synthetase						378.346	422.582	429.818	441.943	529.292	448.937	479.407	456.222	448.318	15.5422	283
ENSMUSG00000031447	Lamp1	lysosomal-associated membrane protein 1						397.694	433.266	452.102	478.587	468.134	428.981	460.189	464.43	447.923	9.34052	284
ENSMUSG00000063882	Uqcrh	ubiquinol-cytochrome c reductase hinge protein						479.126	464.068	461.225	442.764	419.358	445.873	426.633	432.66	446.464	7.22988	285
ENSMUSG00000036427	Gpi1	glucose phosphate isomerase 1						435.587	445.149	460.158	430.256	486.457	440.819	455.827	408.975	445.404	8.11269	286
ENSMUSG00000066443	Gm10163	predicted pseudogene 10163						517.635	462.429	367.951	372.823	419.427	548.697	540.135	332.111	445.151	29.8589	287
ENSMUSG00000021546	Hnrnpk	heterogeneous nuclear ribonucleoprotein K						361.009	390.24	411.811	436.592	438.263	474.975	503.775	511.377	441.005	18.8519	288
ENSMUSG00000005779	Psmb4	proteasome (prosome, macropain) subunit, beta type 4						380.955	418.354	415.729	415.043	482.675	469.827	473.819	465.532	440.242	13.1426	289
ENSMUSG00000069014	Gm5641	predicted gene 5641						367.217	422.198	448.518	493.872	469.922	388.545	439.59	476.23	438.261	15.4806	290
ENSMUSG00000022234	Cct5	chaperonin containing Tcp1, subunit 5 (epsilon)						386.191	410.231	422.747	413.826	492.026	450.959	467.507	461.618	438.138	12.5267	291
ENSMUSG00000022051	Bnip3l	BCL2/adenovirus E1B interacting protein 3-like						392.991	396.007	421.778	385.793	443.827	475.993	486.861	487.169	436.302	15.258	292
ENSMUSG00000040681	Hmgn1	high mobility group nucleosomal binding domain 1						358.621	451.73	448.724	464.834	499.496	398.589	408.338	450.047	435.047	15.5923	293
ENSMUSG00000047139	Cd24a	CD24a antigen						417.858	396.255	428.571	425.651	388.619	449.981	488.027	482.776	434.717	12.9513	294
ENSMUSG00000061518	Cox5b	cytochrome c oxidase subunit 5B						387.095	454.11	450.283	477.414	490.47	395.939	394.761	415.924	433.25	14.1761	295
ENSMUSG00000004897	Hdgf	hepatoma-derived growth factor						391.61	408.538	419.471	442.775	426.994	434.725	470.409	455.152	431.209	8.9579	296
ENSMUSG00000003814	Calr	calreticulin						403.544	403.092	425.931	467.492	430.653	432.951	429.218	443.559	429.555	7.36569	297
ENSMUSG00000022956	Atp5o	ATP synthase, H+ transporting, mitochondrial F1 complex, O subunit						403.859	409.585	416.743	415.353	472.944	436.004	442.512	423.234	427.529	7.93284	298
ENSMUSG00000059040	Eno1b	enolase 1B, retrotransposed						396.97	429.907	403.734	394.05	491.768	428.91	450.474	420.065	426.985	11.4447	299
ENSMUSG00000030717	Nupr1	nuclear protein transcription regulator 1						423.624	389.584	401.104	422.226	436.158	424.199	439.542	432.543	421.122	6.13554	300
ENSMUSG00000078578	Ube2d3	ubiquitin-conjugating enzyme E2D 3						381.64	385.243	408.523	372.539	386.413	464.258	471.823	484.471	419.364	16.3607	301
ENSMUSG00000031167	Rbm3	RNA binding motif (RNP1, RRM) protein 3						396.218	388.528	415.598	367.925	412.724	461.232	437.294	468.107	418.453	12.4172	302
ENSMUSG00000042712	Tceal9	transcription elongation factor A like 9						377.247	367.509	392.027	381.729	417.995	438.987	463.228	473.072	413.974	14.386	303
ENSMUSG00000028832	Stmn1	stathmin 1						354.673	376.03	397.909	394.262	453.098	439.99	429.105	431.636	409.588	12.0989	304
ENSMUSG00000044285	Gm1821	predicted gene 1821						384.907	379.115	364.732	386.893	470.657	469.416	424.253	390.126	408.762	14.6153	305
ENSMUSG00000021477	Ctsl	cathepsin L						349.353	371.766	352.636	410.374	436.523	434.139	440.332	447.38	405.313	14.5519	306
ENSMUSG00000020048	Hsp90b1	heat shock protein 90, beta (Grp94), member 1						381.859	384.946	416.833	449.434	385.91	384.24	402.033	437.101	405.294	9.34085	307
ENSMUSG00000038412	Higd1a	HIG1 domain family, member 1A						412.76	385.84	405.941	350.531	386.216	429.129	416.789	443.176	403.798	10.2774	308
ENSMUSG00000021996	Esd	esterase D/formylglutathione hydrolase						376.51	373.944	380.699	351.742	413.106	455.924	441.874	411.097	400.612	12.751	309
ENSMUSG00000022890	Atp5j	ATP synthase, H+ transporting, mitochondrial F0 complex, subunit F						411.238	398.386	375.869	394.462	366.237	413.573	404.867	439.125	400.47	8.03865	310
ENSMUSG00000004951	Hspb1	heat shock protein 1						332.754	401.23	384.094	365.954	445.023	399.466	453.746	384.223	395.811	13.99	311
ENSMUSG00000037152	Ndufc1	NADH:ubiquinone oxidoreductase subunit C1						421.517	415.748	426.465	417.417	421.656	321.307	350.601	381.271	394.498	13.9675	312
ENSMUSG00000050335	Lgals3	lectin, galactose binding, soluble 3						344.224	388.168	371.454	353.872	472.013	418.416	422.925	383.365	394.305	14.7971	313
ENSMUSG00000112808	Gm4739	predicted gene 4739						330.182	340.09	383.681	392.028	434.438	409.668	424.446	413.481	391.002	13.4992	314
ENSMUSG00000004285	Atp6v1f	ATPase, H+ transporting, lysosomal V1 subunit F						376.978	371.126	369.156	363.576	433.184	414.052	405.916	383.144	389.642	8.86521	315
ENSMUSG00000064367	mt-Nd5	mitochondrially encoded NADH dehydrogenase 5						365.552	381.005	433.725	456.846	293.654	363.442	374.606	446.117	389.368	19.1001	316
ENSMUSG00000074227	Spint2	serine protease inhibitor, Kunitz type 2						317.521	348.945	369.573	395.987	467.695	404.909	413.315	393.659	388.95	15.9232	317
ENSMUSG00000001847	Rac1	Rac family small GTPase 1						337.974	373.829	381.897	393.216	391.426	397.829	412.238	417.29	388.213	8.78436	318
ENSMUSG00000029465	Arpc3	actin related protein 2/3 complex, subunit 3						355.533	370.279	376.402	353.723	429.709	404.066	401.198	405.389	387.037	9.58464	319
ENSMUSG00000050359	Sprr1a	small proline-rich protein 1A						377.915	374.486	377.563	355.659	358.466	458.33	402.219	389.867	386.813	11.5358	320
ENSMUSG00000075229	Ccdc58	coiled-coil domain containing 58						392.462	387.531	397.618	359.572	340.583	413.15	412.773	384.907	386.074	8.85928	321
ENSMUSG00000058799	Nap1l1	nucleosome assembly protein 1-like 1						361.76	360.866	367.972	356.538	364.447	407.657	404.252	438.74	382.779	10.6716	322
ENSMUSG00000014294	Ndufa2	NADH:ubiquinone oxidoreductase subunit A2						380.335	408.064	372.777	372.967	411.398	380.26	357.223	357.189	380.027	7.21405	323
ENSMUSG00000034024	Cct2	chaperonin containing Tcp1, subunit 2 (beta)						327.968	359.585	350.399	354.116	402.987	398.566	413.225	420.114	378.37	12.1268	324
ENSMUSG00000055302	Mrfap1	Morf4 family associated protein 1						345.782	351.148	351.973	355.08	359.992	412.267	420.118	428.891	378.157	12.5528	325
ENSMUSG00000030057	Cnbp	cellular nucleic acid binding protein						319.579	340.389	357.61	347.701	401.447	405.418	432.695	415.982	377.603	14.5748	326
ENSMUSG00000056737	Capg	capping protein (actin filament), gelsolin-like						339.649	364.598	357.19	360.042	425.781	400.95	377.439	376.396	375.256	9.59753	327
ENSMUSG00000020644	Id2	inhibitor of DNA binding 2	bHLH					344.266	347.045	348.507	313.325	352.27	418.237	431.977	440.664	374.536	16.9949	328
ENSMUSG00000038900	Rpl12	ribosomal protein L12						400.185	409.619	358.277	357.583	388.025	378.786	343.311	336.71	371.562	9.42602	329
ENSMUSG00000018286	Psmb6	proteasome (prosome, macropain) subunit, beta type 6						317.32	360.905	341.783	350.679	430.594	397.382	387.842	382.91	371.177	12.6227	330
ENSMUSG00000024953	Prdx5	peroxiredoxin 5						352.793	357.519	343.746	337.393	440.283	391.332	399.976	346.098	371.142	12.7184	331
ENSMUSG00000042043	Tbca	tubulin cofactor A						416.79	362.551	363.091	346.609	306.452	397.051	377.933	383.87	369.293	11.848	332
ENSMUSG00000073616	Cops9	COP9 signalosome subunit 9						414.851	378.449	354.54	370.374	344.811	368.803	348.285	354.367	366.81	8.00963	333
ENSMUSG00000028367	Txn1	thioredoxin 1						348.918	370.685	374.475	347.61	370.93	376.575	383.717	361.552	366.808	4.60657	334
ENSMUSG00000022336	Eif3e	eukaryotic translation initiation factor 3, subunit E						376.416	350.147	358.642	315.436	320.882	398.307	393.739	404.803	364.797	12.1843	335
ENSMUSG00000029810	Tmem176b	transmembrane protein 176B						313.643	324.027	374.176	367.63	414.852	360.333	390.746	372.095	364.688	11.6701	336
ENSMUSG00000020719	Ddx5	DEAD (Asp-Glu-Ala-Asp) box polypeptide 5						296.469	335.255	359.917	389.018	398.051	356.606	377.509	394.565	363.424	12.2165	337
ENSMUSG00000071655	Ubxn1	UBX domain protein 1						328.147	343.737	339	340.314	396.74	372.147	391.087	369.593	360.096	9.12546	338
ENSMUSG00000025204	Ndufb8	NADH:ubiquinone oxidoreductase subunit B8						346.51	360.023	340.486	340.347	390.257	380.853	367.011	355.06	360.068	6.50944	339
ENSMUSG00000005732	Ranbp1	RAN binding protein 1						316.403	348.351	345.451	349.931	355.631	381.929	381.058	384.749	357.938	8.31455	340
ENSMUSG00000054766	Set	SET nuclear oncogene						303.735	341.114	334.788	351.525	339.823	356.082	414.582	399.335	355.123	12.6692	341
ENSMUSG00000035674	Ndufa3	NADH:ubiquinone oxidoreductase subunit A3						372.049	360.817	359.903	343.525	346.907	361.655	339.527	344.968	353.669	4.04419	342
ENSMUSG00000027566	Psma7	proteasome (prosome, macropain) subunit, alpha type 7						340.049	340.236	340.172	325.001	379.376	375.112	364.557	359.616	353.015	6.86755	343
ENSMUSG00000041571	Selenow	selenoprotein W						382.675	354.267	345.434	332.719	353.101	366.373	343.546	341.538	352.457	5.587	344
ENSMUSG00000049124	Gm8186	predicted gene 8186						352.459	367.867	385.515	345.703	394.478	326.751	340.213	298.649	351.454	11.0516	345
ENSMUSG00000032330	Cox7a2	cytochrome c oxidase subunit 7A2						355.407	349.183	359.745	335.818	341.909	369.748	337.724	342.086	348.952	4.19616	346
ENSMUSG00000057278	Snrpg	small nuclear ribonucleoprotein polypeptide G						392.044	369.426	367.167	361.68	361.837	324.41	304.013	303.176	347.969	11.6845	347
ENSMUSG00000096210	H1f0	H1 histone family, member 0						272.731	316.31	389.242	362.463	405.147	343.226	353.308	332.442	346.859	14.7164	348
ENSMUSG00000026864	Hspa5	heat shock protein 5						311.207	334.811	363.725	389.472	329.342	313.947	349.917	381.991	346.801	10.4797	349
ENSMUSG00000049775	Tmsb4x	thymosin, beta 4, X chromosome						365.94	359.084	340.482	295.181	286.591	384.438	352.402	374.061	344.772	12.6809	350
ENSMUSG00000022403	St13	suppression of tumorigenicity 13						305.346	328.4	332.628	325.258	370.528	344.794	376.504	371.191	344.331	9.17824	351
ENSMUSG00000024914	Drap1	Dr1 associated protein 1 (negative cofactor 2 alpha)						347.533	320.865	325.742	332.088	386.738	344.719	345.799	332.897	342.048	7.25305	352
ENSMUSG00000022450	Ndufa6	NADH:ubiquinone oxidoreductase subunit A6						361.819	346.192	351.983	334.227	369.038	342.387	313.551	313.087	341.536	7.2521	353
ENSMUSG00000066551	Hmgb1	high mobility group box 1	HMG					290.188	296.14	314.758	311.823	294.653	374.644	419.859	414.396	339.558	19.3664	354
ENSMUSG00000022108	Itm2b	integral membrane protein 2B						283.231	314.149	324.653	344.443	370.03	341.661	361.709	372.872	339.094	10.853	355
ENSMUSG00000015837	Sqstm1	sequestosome 1						264.065	318.069	314.418	338.669	397.814	350.006	385.058	343.937	339.005	14.8706	356
ENSMUSG00000024359	Hspa9	heat shock protein 9						278.988	314.87	333.062	347.937	361.87	325.768	362.629	372.544	337.209	10.9011	357
ENSMUSG00000022285	Ywhaz	tyrosine 3-monooxygenase/tryptophan 5-monooxygenase activation protein, zeta polypeptide						320.809	307.728	329.625	315.001	287.551	371.206	383.905	381.478	337.163	12.9909	358
ENSMUSG00000078784	1810022K09Rik	RIKEN cDNA 1810022K09 gene						398.211	337.403	351.057	321.754	248.553	315.494	333.412	361.452	333.417	15.2189	359
ENSMUSG00000030122	Ptms	parathymosin						304.911	322.46	332.562	368.022	354.967	318.405	338.817	317.995	332.267	7.41266	360
ENSMUSG00000042747	Krtcap2	keratinocyte associated protein 2						309.465	325.466	340.695	321.294	365.974	332.71	320.054	338.684	331.793	6.09818	361
ENSMUSG00000046711	Hmga1	high mobility group AT-hook 1	HMGI/HMGY					319.914	335.905	316.986	322.636	343.112	347.085	334.696	331.036	331.421	3.85216	362
ENSMUSG00000053565	Eif3k	eukaryotic translation initiation factor 3, subunit K						318.213	343.192	316.552	317.446	367.235	331.213	328.536	317.715	330.013	6.25699	363
ENSMUSG00000019054	Fis1	fission, mitochondrial 1						337.894	331.641	320.005	312.505	333.211	345.782	329.921	320.965	328.99	3.78874	364
ENSMUSG00000025408	Ddit3	DNA-damage inducible transcript 3	TF_bZIP					311.29	303.124	331.969	297.839	350.332	344.922	351.333	323.872	326.835	7.51095	365
ENSMUSG00000053398	Phgdh	3-phosphoglycerate dehydrogenase						256.601	315.221	305.433	346.411	384.626	334.522	340.106	330.332	326.656	13.0219	366
ENSMUSG00000048076	Arf1	ADP-ribosylation factor 1						275.524	301.554	314.216	322.013	354.404	342.529	348.215	347.016	325.684	9.74178	367
ENSMUSG00000069744	Psmb3	proteasome (prosome, macropain) subunit, beta type 3						279.029	317.043	305.137	304.664	367.23	343.371	330.396	340.341	323.401	9.7739	368
ENSMUSG00000023039	Krt7	keratin 7						270.717	337.441	325.445	340.974	382.1	322.691	306.963	290.31	322.08	12.0142	369
ENSMUSG00000027940	Tpm3	tropomyosin 3, gamma						285.564	307.44	323.774	339.79	334.22	324.143	323.537	332.645	321.389	6.1612	370
ENSMUSG00000036752	Tubb4b	tubulin, beta 4B class IVB						261.308	301.082	299.868	330.366	381.294	334.44	320.289	326.44	319.386	12.1885	371
ENSMUSG00000044627	Swi5	SWI5 recombination repair homolog (yeast)						319.876	289.241	290.674	281.426	335.869	343.824	344.678	336.511	317.762	9.40652	372
ENSMUSG00000000563	Atp5f1	ATP synthase, H+ transporting, mitochondrial F0 complex, subunit B1						285.442	289.19	307.561	289.186	316.136	338.387	345.27	359.901	316.384	10.1126	373
ENSMUSG00000026087	Mrpl30	mitochondrial ribosomal protein L30						334.553	314.063	329.017	310.866	290.74	318.33	309.099	317.836	315.563	4.69941	374
ENSMUSG00000083380	Ndufb4c	NADH:ubiquinone oxidoreductase subunit B4C						318.534	282.552	316.296	293.507	332.533	341.264	316.412	319.233	315.041	6.74285	375
ENSMUSG00000033161	Atp1a1	ATPase, Na+/K+ transporting, alpha 1 polypeptide			ATPase Na+/K+ transporting subunits			296.74	319.795	339.196	353.644	296.051	298.967	309.881	301.418	314.462	7.62953	376
ENSMUSG00000036438	Calm2	calmodulin 2						274.964	280.222	301.4	306.173	320.905	330.536	341.434	351.084	313.34	9.75623	377
ENSMUSG00000027342	Pcna	proliferating cell nuclear antigen						265.4	276.548	303.488	286.058	340.585	339.292	338.235	353.999	312.951	12.0866	378
ENSMUSG00000076432	Ywhaq	tyrosine 3-monooxygenase/tryptophan 5-monooxygenase activation protein theta						274.355	291.935	321.865	311.74	344.546	314.005	317.523	327.343	312.914	7.60592	379
ENSMUSG00000060073	Psma3	proteasome (prosome, macropain) subunit, alpha type 3						276.151	312.772	311.086	287.184	315.036	325.904	322.887	342.448	311.684	7.49975	380
ENSMUSG00000025781	Atp5c1	ATP synthase, H+ transporting, mitochondrial F1 complex, gamma polypeptide 1						306.146	296.466	307.432	285.054	307.452	332.502	326.752	329.309	311.389	5.94284	381
ENSMUSG00000015120	Ube2i	ubiquitin-conjugating enzyme E2I						276.963	295.243	300.913	305.365	327.337	326.165	335.411	321.973	311.171	7.01177	382
ENSMUSG00000005610	Eif4g2	eukaryotic translation initiation factor 4, gamma 2						278.639	279.326	320.948	302.587	290.526	297.329	345.389	359.992	309.342	10.6796	383
ENSMUSG00000056612	Ppp1r14b	protein phosphatase 1, regulatory inhibitor subunit 14B						290.036	310.368	301.834	312.803	310.811	310.91	308.351	312.781	307.237	2.75186	384
ENSMUSG00000111202	Gm48275	predicted gene, 48275						365.774	304.272	375.922	289.3	242.388	314.59	236.851	328.485	307.198	17.998	385
ENSMUSG00000073676	Hspe1	heat shock protein 1 (chaperonin 10)						312.809	314.322	294.289	293.474	283.475	313.512	327.991	310.536	306.301	5.13555	386
ENSMUSG00000084786	Ubl5	ubiquitin-like 5						321.878	324.307	301.708	304.732	333.41	295.314	269.927	298.11	306.173	7.11642	387
ENSMUSG00000027620	Rbm39	RNA binding motif protein 39						269.335	287.616	298.322	319.06	311.964	288.222	338.795	335.861	306.147	8.69158	388
ENSMUSG00000025428	Atp5a1	ATP synthase, H+ transporting, mitochondrial F1 complex, alpha subunit 1						248.606	282.821	299.739	311.69	352.594	310.568	322.941	314.479	305.43	10.733	389
ENSMUSG00000028044	Cks1b	CDC28 protein kinase 1b		Unclassified				291.624	280.615	302.423	298.652	314.85	300.721	314.976	320.389	303.031	4.70774	390
ENSMUSG00000034127	Tspan8	tetraspanin 8						280.676	276.124	290.258	287.274	302.633	330.056	334.98	319.358	302.67	8.07547	391
ENSMUSG00000045996	Polr2k	polymerase (RNA) II (DNA directed) polypeptide K						347.478	283.23	297.558	259.914	224.053	339.177	322.551	339.299	301.658	15.5161	392
ENSMUSG00000023010	Tmbim6	transmembrane BAX inhibitor motif containing 6						271.048	285.133	305.268	319.731	320.135	300.79	312.748	292.54	300.924	6.11453	393
ENSMUSG00000019362	D8Ertd738e	DNA segment, Chr 8, ERATO Doi 738, expressed						281.808	309.604	310.9	297.478	313.088	296.456	291.655	293.733	299.34	3.86752	394
ENSMUSG00000019179	Mdh2	malate dehydrogenase 2, NAD (mitochondrial)						258.201	288.361	291.67	299.758	327.269	307.408	310.182	311.396	299.281	7.29481	395
ENSMUSG00000028478	Clta	clathrin, light polypeptide (Lca)						281.53	290.209	303.591	282.688	320.683	300.227	316.529	297.767	299.153	5.08828	396
ENSMUSG00000001418	Glmp	glycosylated lysosomal membrane protein	NCU-G1					233.694	284.384	300.26	336.901	354.523	287.506	297.982	276.903	296.519	13.0737	397
ENSMUSG00000022892	App	amyloid beta (A4) precursor protein						262.345	294.994	336.642	367.746	292.266	241.406	291.999	284.248	296.456	14.0661	398
ENSMUSG00000092341	Malat1	metastasis associated lung adenocarcinoma transcript 1 (non-coding RNA)						288.529	258.507	311	302.988	249.548	259.199	320.505	361.819	294.012	13.4619	399
ENSMUSG00000025068	Gsto1	glutathione S-transferase omega 1						254.561	275.271	279.929	262.989	276.485	341.921	330.342	325.791	293.411	11.9507	400
ENSMUSG00000024844	Banf1	barrier to autointegration factor 1						270.396	266.857	278.54	265.491	324.81	317.946	319.247	303.829	293.39	9.06262	401
ENSMUSG00000003072	Atp5d	ATP synthase, H+ transporting, mitochondrial F1 complex, delta subunit						267.856	298.041	302.299	299.169	335.579	283.501	283.694	271.389	292.691	7.60431	402
ENSMUSG00000039105	Atp6v1g1	ATPase, H+ transporting, lysosomal V1 subunit G1						271.978	283.092	297.626	279.865	307.222	317.069	301.627	281.827	292.538	5.53094	403
ENSMUSG00000026750	Psmb7	proteasome (prosome, macropain) subunit, beta type 7						258.756	272.619	281.965	266.843	309.488	313.21	323.736	308.787	291.926	8.7209	404
ENSMUSG00000061167	Rpl15-ps3	ribosomal protein L15, pseudogene 3						301.839	327.214	290.015	273.202	245.464	434.547	362.264	97.739	291.535	34.5512	405
ENSMUSG00000068823	Csde1	cold shock domain containing E1, RNA binding	CSD					282.98	285.553	300.004	279.147	247.315	294.04	310.473	328.771	291.035	8.49264	406
ENSMUSG00000079658	Eloc	elongin C						285.68	302.827	283.376	269.338	255.4	305.912	286.974	338.417	290.991	8.91416	407
ENSMUSG00000024248	Cox7a2l	cytochrome c oxidase subunit 7A2 like						309.804	283.978	290.943	272.686	293.928	289.591	290.572	293.815	290.664	3.6744	408
ENSMUSG00000063856	Gpx1	glutathione peroxidase 1						300.196	296.713	276.024	270.222	324.21	314.227	275.423	256.893	289.238	8.23395	409
ENSMUSG00000002233	Rhoc	ras homolog family member C						256.424	269.355	276.33	284.661	312.283	304.015	303.588	302.212	288.608	7.04594	410
ENSMUSG00000006589	Aprt	adenine phosphoribosyl transferase						279.297	287.852	274.132	276.738	308.719	289.28	291.139	272.954	285.014	4.2061	411
ENSMUSG00000039630	Hnrnpu	heterogeneous nuclear ribonucleoprotein U						256.571	279.115	317.992	307.882	276.365	255.561	294.1	290.189	284.722	7.91163	412
ENSMUSG00000027944	Hax1	HCLS1 associated X-1						222.818	250.325	267.101	261.901	344.21	303.645	305.797	321.729	284.691	14.3658	413
ENSMUSG00000025613	Cct8	chaperonin containing Tcp1, subunit 8 (theta)						250.266	260.761	266.572	264.024	287.699	304.915	323.168	317.156	284.32	9.87822	414
ENSMUSG00000022564	Grina	glutamate receptor, ionotropic, N-methyl D-aspartate-associated protein 1 (glutamate binding)						251.437	254.813	276.446	286.787	349.94	271.517	300.007	282.891	284.23	10.9692	415
ENSMUSG00000001416	Cct3	chaperonin containing Tcp1, subunit 3 (gamma)						240.881	274.182	278.266	272.753	312.463	292.547	304.622	294.293	283.751	7.93824	416
ENSMUSG00000021282	Eif5	eukaryotic translation initiation factor 5						232.29	253.888	277.916	264.582	296.319	300.737	316.734	319.131	282.7	10.9535	417
ENSMUSG00000020219	Timm13	translocase of inner mitochondrial membrane 13						277.235	311.02	286.163	269.672	317.647	300.646	257.41	237.677	282.184	9.65614	418
ENSMUSG00000019961	Tmpo	thymopoietin						243.679	259.751	277.938	294.096	292.224	275.15	299.15	310.593	281.573	7.77819	419
ENSMUSG00000082585	Gm15387	predicted gene 15387						244.18	246.733	263.107	279.004	319.389	285.311	295.765	311.608	280.637	9.9105	420
ENSMUSG00000034868	Myl12b	myosin, light chain 12B, regulatory						222.776	273.059	297.006	283.567	327.016	272.885	263.984	298.64	279.867	10.765	421
ENSMUSG00000005161	Prdx2	peroxiredoxin 2						248.811	271.616	256.553	266.627	302.37	294.436	281.97	308.282	278.833	7.64541	422
ENSMUSG00000027423	Snx5	sorting nexin 5						263.224	261.535	276.286	245.722	289.172	298.122	296.038	299.705	278.725	7.14171	423
ENSMUSG00000029064	Gnb1	guanine nucleotide binding protein (G protein), beta 1						253.076	273.778	276.34	278.062	291.546	273.564	298.675	273.942	277.373	4.79167	424
ENSMUSG00000018965	Ywhah	tyrosine 3-monooxygenase/tryptophan 5-monooxygenase activation protein, eta polypeptide						243.384	255.353	263.215	278.525	252.578	310.468	298.309	316.33	277.27	9.91738	425
ENSMUSG00000005625	Psmd4	proteasome (prosome, macropain) 26S subunit, non-ATPase, 4						247.483	265.36	268.955	264.99	324.757	287.106	286.353	267.753	276.595	8.20522	426
ENSMUSG00000021486	Prelid1	PRELI domain containing 1						267.413	278.999	275.698	273.449	286.645	288.62	275.802	263.201	276.228	3.06288	427
ENSMUSG00000007891	Ctsd	cathepsin D						234.557	263.467	261.023	297.26	306.286	270.581	285.662	280.232	274.883	8.01651	428
ENSMUSG00000027712	Anxa5	annexin A5						206.531	241.468	258.608	277.703	322.189	293.141	291.483	304.159	274.41	13.204	429
ENSMUSG00000054091	1810037I17Rik	RIKEN cDNA 1810037I17 gene						292.104	271.229	271.104	247.071	269.476	285.43	285.322	271.492	274.153	4.91787	430
ENSMUSG00000021520	Uqcrb	ubiquinol-cytochrome c reductase binding protein						304.764	263.214	283.573	258.887	237.42	279.778	267.249	294.624	273.689	7.5881	431
ENSMUSG00000116993	Gm32461	predicted gene, 32461						328.55	269.108	268.577	249.571	221.516	288.14	287.517	274.866	273.481	10.9884	432
ENSMUSG00000023905	Tnfrsf12a	tumor necrosis factor receptor superfamily, member 12a						226.353	257.089	262.489	265.442	304.04	302.498	282.825	277.34	272.259	9.00519	433
ENSMUSG00000047501	Cldn4	claudin 4						229.652	261.462	255.085	310.191	323.945	255.665	270.605	270.004	272.076	10.8727	434
ENSMUSG00000021024	Psma6	proteasome (prosome, macropain) subunit, alpha type 6						256.264	249.617	268.411	244.704	270.753	294.467	298.825	293.158	272.025	7.53587	435
ENSMUSG00000036112	Metap2	methionine aminopeptidase 2						226.989	267.753	264.009	266.051	259.939	272.12	333.141	285.477	271.935	10.5293	436
ENSMUSG00000026547	Tagln2	transgelin 2						248.39	254.431	262.79	276.167	302.786	264.751	282.722	279.905	271.493	6.18758	437
ENSMUSG00000028062	Lamtor2	late endosomal/lysosomal adaptor, MAPK and MTOR activator 2						265.708	255.711	254.94	256.993	293.372	283.737	284.632	270.671	270.721	5.28463	438
ENSMUSG00000019942	Cdk1	cyclin-dependent kinase 1		Cyclin dependent kinases				235.401	245.577	256.61	258.194	325.511	279.213	283.041	277.141	270.086	9.90993	439
ENSMUSG00000114458	Gm47551	predicted gene, 47551						328.526	282.23	286.599	276.874	204.255	252.525	258.169	268.536	269.714	12.4405	440
ENSMUSG00000020402	Vdac1	voltage-dependent anion channel 1				Voltage dependent anion channels		246.291	270.865	268.448	265.328	270.376	266.944	293.593	273.772	269.452	4.56116	441
ENSMUSG00000046727	Cystm1	cysteine-rich transmembrane module containing 1						244.423	244.441	272.864	239.517	270.635	303.448	292.373	285.856	269.194	8.56785	442
ENSMUSG00000073411	H2-D1	histocompatibility 2, D region locus 1						240.106	278.559	272.869	318.765	298.273	237.582	252.038	252.933	268.891	10.1836	443
ENSMUSG00000032383	Ppib	peptidylprolyl isomerase B						239.493	257.56	248.99	255.533	302.709	284.791	285.121	276.618	268.852	7.66099	444
ENSMUSG00000032562	Gnai2	guanine nucleotide binding protein (G protein), alpha inhibiting 2						238.842	263.181	274.676	274.718	288.015	268.737	273.589	267.258	268.627	4.98729	445
ENSMUSG00000023904	Hcfc1r1	host cell factor C1 regulator 1 (XPO1-dependent)						291.513	254.758	258.428	240.764	255.636	284.301	272.67	276.401	266.809	6.06701	446
ENSMUSG00000026234	Ncl	nucleolin						224.578	254.679	263.746	285.23	260.143	257.906	282.442	304.883	266.701	8.55329	447
ENSMUSG00000050732	Vamp8	vesicle-associated membrane protein 8						252.357	254.062	257.333	239.536	291.801	285.932	286.699	262.578	266.287	6.82245	448
ENSMUSG00000029322	Plac8	placenta-specific 8						321.822	257.546	265.315	245.723	236.681	271.927	273.883	255.755	266.081	9.12316	449
ENSMUSG00000021134	Srsf5	serine/arginine-rich splicing factor 5						225.123	245.128	267.424	288.582	290.347	249.335	285.408	277.114	266.057	8.44015	450
ENSMUSG00000007739	Cct4	chaperonin containing Tcp1, subunit 4 (delta)						240.179	248.414	266.559	241.064	265.018	280.717	287.342	297.949	265.905	7.66695	451
ENSMUSG00000038587	Akap12	A kinase (PRKA) anchor protein (gravin) 12						240.266	253.027	265.934	308.819	261.426	231.862	289.508	272.441	265.41	8.90588	452
ENSMUSG00000036256	Igfbp7	insulin-like growth factor binding protein 7						187.847	250.243	254.275	279.934	313.106	279.109	279.445	276.679	265.08	12.933	453
ENSMUSG00000076437	Selenoh	selenoprotein H						278.177	270.731	272.259	248.179	270.072	262.017	250.548	261.668	264.206	3.75988	454
ENSMUSG00000027506	Tpd52	tumor protein D52						229.909	263.415	275.67	255.361	272.733	259.613	272.642	271.929	262.659	5.33193	455
ENSMUSG00000029622	Arpc1b	actin related protein 2/3 complex, subunit 1B						231.174	276.493	279.321	294.902	309.26	237.544	241.884	227.221	262.225	11.1709	456
ENSMUSG00000004771	Rab11a	RAB11A, member RAS oncogene family						236.844	230.526	263.806	240.813	304.194	280.356	267.964	269.948	261.806	8.7539	457
ENSMUSG00000022205	Sub1	SUB1 homolog (S. cerevisiae)	PC4					279.455	259.936	256.763	233.961	220.073	288.706	278.09	275.099	261.51	8.4749	458
ENSMUSG00000006932	Ctnnb1	catenin (cadherin associated protein), beta 1						235.719	238.037	262.326	277.851	267.327	249.461	287.148	271.118	261.123	6.56189	459
ENSMUSG00000030007	Cct7	chaperonin containing Tcp1, subunit 7 (eta)						231.288	247.638	246.526	253.09	291.373	273.162	277.144	267.626	260.981	6.95439	460
ENSMUSG00000068039	Tcp1	t-complex protein 1						240.335	256.065	243.975	246.699	258.051	271.422	274.055	283.158	259.22	5.50835	461
ENSMUSG00000004207	Psap	prosaposin						216.113	255.819	263.813	308.149	285.607	243.8	252.49	240.263	258.257	10.0144	462
ENSMUSG00000099133	Gm27605	predicted gene, 27605						217.488	207.685	246.329	228.573	242.3	267.78	372.556	279.698	257.801	18.4733	463
ENSMUSG00000031490	Eif4ebp1	eukaryotic translation initiation factor 4E binding protein 1						234.939	248.659	238.672	254.886	286.623	271.399	272.02	252.434	257.454	6.30523	464
ENSMUSG00000010095	Slc3a2	solute carrier family 3 (activators of dibasic and neutral amino acid transport), member 2			Solute carriers			209.964	233.288	265.368	276.998	306.386	233.546	282.363	250.431	257.293	11.1157	465
ENSMUSG00000025132	Arhgdia	Rho GDP dissociation inhibitor (GDI) alpha						227.163	245.632	250.198	267.719	277.979	254.434	271.831	261.635	257.074	5.77677	466
ENSMUSG00000047843	Bri3	brain protein I3						238.578	254.893	253.36	252.177	279.251	263.165	263.722	250.156	256.913	4.23721	467
ENSMUSG00000015092	Edf1	endothelial differentiation-related factor 1						234.178	249.472	246.304	256.145	283.235	266.85	261.818	253.541	256.443	5.19384	468
ENSMUSG00000020022	Ndufa12	NADH:ubiquinone oxidoreductase subunit A12						246.099	251.148	254.93	233.604	271.365	275.851	252.237	258.529	255.47	4.76735	469
ENSMUSG00000024587	Nars	asparaginyl-tRNA synthetase						213.489	246.329	253.671	269.962	260.487	248.152	290.706	260.614	255.426	7.79876	470
ENSMUSG00000038803	Ost4	oligosaccharyltransferase complex subunit 4 (non-catalytic)						270.643	280.648	276.741	266.8	246.382	238.996	236.979	224.322	255.189	7.45271	471
ENSMUSG00000029642	Polr1d	polymerase (RNA) I polypeptide D						260.53	257.532	256.744	241.012	251.742	257.096	258.831	252.417	254.488	2.19563	472
ENSMUSG00000093904	Tomm20	translocase of outer mitochondrial membrane 20						242.452	276.449	270.24	282.81	293.229	215.685	215.667	234.057	253.824	10.8602	473
ENSMUSG00000041028	Ghitm	growth hormone inducible transmembrane protein						200.316	225.306	240.132	254.612	274.626	262.704	284.198	288.434	253.791	10.7708	474
ENSMUSG00000009079	Ewsr1	Ewing sarcoma breakpoint region 1						223.327	241.933	256.676	284.456	302.717	237.231	230.91	246.1	252.919	9.69342	475
ENSMUSG00000021218	Gdi2	guanosine diphosphate (GDP) dissociation inhibitor 2						236.802	235.286	240.946	248.02	254.752	265.468	271.252	264.597	252.14	4.93975	476
ENSMUSG00000030189	Ybx3	Y box protein 3	CSD					249.018	260.523	260.926	251.36	249.546	243.132	258.889	242.302	251.962	2.63143	477
ENSMUSG00000021131	Erh	ERH mRNA splicing and mitosis factor						245.355	238.175	242.797	243.426	265.804	264.88	266.251	248.979	251.958	4.14497	478
ENSMUSG00000004455	Ppp1cc	protein phosphatase 1 catalytic subunit gamma						216.982	229.982	251.314	263.734	271.997	247.981	269.253	262.674	251.74	6.9131	479
ENSMUSG00000001794	Capns1	calpain, small subunit 1						215.574	233.193	240.717	249.819	309.896	253.688	253.396	252.919	251.15	9.60324	480
ENSMUSG00000092274	Neat1	nuclear paraspeckle assembly transcript 1 (non-protein coding)						224.312	215.296	278.418	265.198	325.508	217.011	245.941	222.812	249.312	13.6568	481
ENSMUSG00000036309	Skp1a	S-phase kinase-associated protein 1A						249.799	229.502	240.452	213.751	221.918	270.569	283.992	282.353	249.042	9.66582	482
ENSMUSG00000007656	Arpp19	cAMP-regulated phosphoprotein 19						254.351	251.972	246.105	241.251	232.302	248.208	262.919	252.843	248.744	3.25508	483
ENSMUSG00000008682	Rpl10	ribosomal protein L10						284.625	236.927	266.375	220.991	227.917	271.521	256.366	218.942	247.958	8.86609	484
ENSMUSG00000033379	Atp6v0b	ATPase, H+ transporting, lysosomal V0 subunit B						219.608	244.665	250.366	235.181	275.258	250.643	258.374	243.183	247.16	5.76675	485
ENSMUSG00000035215	Lsm7	LSM7 homolog, U6 small nuclear RNA and mRNA degradation associated						250.656	246.233	252.788	237.079	236.116	242.572	243.331	260.983	246.22	2.95218	486
ENSMUSG00000028843	Sh3bgrl3	SH3 domain binding glutamic acid-rich protein-like 3						254.014	252.831	249.089	239.161	225.417	258.36	238.068	247.718	245.582	3.79868	487
ENSMUSG00000018446	C1qbp	complement component 1, q subcomponent binding protein						234.919	234.236	236.902	221.179	245.572	257.938	264.777	257.765	244.161	5.28928	488
ENSMUSG00000024121	Atp6v0c	ATPase, H+ transporting, lysosomal V0 subunit C						203.334	238.39	239.453	249.116	282.263	256.134	241.986	242.548	244.153	7.73364	489
ENSMUSG00000040731	Eif4h	eukaryotic translation initiation factor 4H						213.303	230.23	243.351	255.297	261.77	245.828	247.191	250.583	243.444	5.39533	490
ENSMUSG00000029462	Vps29	VPS29 retromer complex component						221.393	239.504	239.149	223.956	256.8	266.458	252.137	245.463	243.108	5.48823	491
ENSMUSG00000010376	Nedd8	neural precursor cell expressed, developmentally down-regulated gene 8						212.07	239.539	238.537	230.095	271.628	246.348	248.126	255.912	242.782	6.23715	492
ENSMUSG00000000088	Cox5a	cytochrome c oxidase subunit 5A						244.828	240.034	241.01	225.928	230.939	254.466	249.294	247.732	241.779	3.36627	493
ENSMUSG00000018569	Cldn7	claudin 7						210.811	231.827	221.423	251.084	255.681	254.277	255.242	246.425	240.846	6.1301	494
ENSMUSG00000087590	Epb41l4aos	erythrocyte membrane protein band 4.1 like 4a, opposite strand						290.712	244.174	234.572	220.43	210.48	241.64	244.376	238.504	240.611	8.33894	495
ENSMUSG00000006519	Cyba	cytochrome b-245, alpha polypeptide						211.584	232.377	236.377	230.782	256.251	261.741	247.607	248.139	240.607	5.70339	496
ENSMUSG00000101188	Eif4a-ps4	eukaryotic translation initiation factor 4A, pseudogene 4						200.413	230.843	226.413	227.702	293.554	232.328	257.436	255.188	240.485	9.862	497
ENSMUSG00000016319	Slc25a5	solute carrier family 25 (mitochondrial carrier, adenine nucleotide translocator), member 5			Solute carriers			220.285	226.846	236.751	231.619	250.766	256.634	238.337	258.101	239.917	4.93801	498
ENSMUSG00000106918	Mrpl33	mitochondrial ribosomal protein L33						244.77	244.374	225.32	245.622	221.394	249.623	239.456	246.727	239.661	3.71386	499
ENSMUSG00000029994	Anxa4	annexin A4						195.84	222.916	227.856	233.545	254.112	251.734	265.286	258.879	238.771	8.18501	500
ENSMUSG00000033020	Polr2f	polymerase (RNA) II (DNA directed) polypeptide F						233.13	236.013	231.763	222.665	234.434	273.585	262.075	215.458	238.64	6.89883	501
ENSMUSG00000004849	Ap1s1	adaptor protein complex AP-1, sigma 1						212.226	227.495	225.842	236.948	256.794	248.261	269.911	227.803	238.16	6.68711	502
ENSMUSG00000038722	Bud31	BUD31 homolog						232.903	225.9	229.33	210.342	231.735	267.665	251.447	249.489	237.351	6.3263	503
ENSMUSG00000059734	Ndufs8	NADH:ubiquinone oxidoreductase core subunit S8						223.155	226.292	233.582	223.934	268.261	248.895	237.538	228.503	236.27	5.47024	504
ENSMUSG00000027375	Mal	myelin and lymphocyte protein, T cell differentiation protein						218.604	213.848	219.308	222.927	252.793	243.58	264.223	252.933	236.027	6.89923	505
ENSMUSG00000028195	Ccn1	cellular communication network factor 1						194.575	199.512	214.107	245.24	349.217	230.223	216.436	237.991	235.913	17.3464	506
ENSMUSG00000039771	Polr2j	polymerase (RNA) II (DNA directed) polypeptide J						238.955	225.887	222.406	222.041	262.02	238.458	241.744	235.256	235.846	4.64272	507
ENSMUSG00000070394	Tmem256	transmembrane protein 256						263.57	240.609	232.854	208.169	242.31	238.164	238.246	220.803	235.59	5.73979	508
ENSMUSG00000035692	Isg15	ISG15 ubiquitin-like modifier						202.287	239.567	226.581	227.209	298.28	234.204	226.087	228.176	235.299	9.77679	509
ENSMUSG00000007850	Hnrnph1	heterogeneous nuclear ribonucleoprotein H1						211.436	204.509	243.423	238.555	231.501	226.168	246.887	279.315	235.224	8.19793	510
ENSMUSG00000027170	Eif3m	eukaryotic translation initiation factor 3, subunit M						239.684	227.098	230.944	207.101	228.334	256.496	237.318	254.323	235.162	5.61287	511
ENSMUSG00000026341	Actr3	ARP3 actin-related protein 3						199.827	221.183	224.226	225.908	252.071	235.441	251.144	264.953	234.344	7.40755	512
ENSMUSG00000015804	Med28	mediator complex subunit 28						231.926	238.768	224.857	217.545	257.208	248.343	231.274	222.258	234.022	4.76419	513
ENSMUSG00000029649	Pomp	proteasome maturation protein						213.69	244.459	256.99	227.896	225.307	251.816	219.081	228.929	233.521	5.55356	514
ENSMUSG00000046432	Bex3	brain expressed X-linked 3						209.509	223.989	222.102	248.886	273.072	221.792	229.736	233.199	232.786	7.00241	515
ENSMUSG00000024966	Stip1	stress-induced phosphoprotein 1						189.461	214.589	217.763	231.361	255.633	242.328	256.717	254.427	232.785	8.54606	516
ENSMUSG00000007041	Clic1	chloride intracellular channel 1				Chloride intracellular channels		210.288	223.386	223.776	231.706	257.323	237.326	239.677	235.3	232.348	4.91318	517
ENSMUSG00000018171	Vmp1	vacuole membrane protein 1						180.768	232.244	199.711	236.473	285.921	242.513	242.591	238.163	232.298	11.0638	518
ENSMUSG00000022452	Smdt1	single-pass membrane protein with aspartate rich tail 1						226.496	233.063	221.539	223.682	262.257	231.32	227.982	224.085	231.303	4.63091	519
ENSMUSG00000058135	Gstm1	glutathione S-transferase, mu 1						196.948	201.931	226.661	240.76	267.888	217.945	242.985	251.012	230.766	8.65352	520
ENSMUSG00000030869	Ndufab1	NADH:ubiquinone oxidoreductase subunit AB1						201.267	221.307	240.34	235.084	268.604	227.659	222.265	217.324	229.231	7.00186	521
ENSMUSG00000037815	Ctnna1	catenin (cadherin associated protein), alpha 1						201.496	226.944	224.002	247.968	241.068	215.32	233.552	239.757	228.763	5.36895	522
ENSMUSG00000081485	Gm12338	predicted gene 12338						162.934	229.116	259.618	318.949	344.664	182.244	147.234	183.096	228.482	25.9629	523
ENSMUSG00000024346	Pfdn1	prefoldin 1						239.953	243.968	227.854	227.876	249.881	224.69	209.351	203.964	228.442	5.68772	524
ENSMUSG00000072772	Grcc10	gene rich cluster, C10 gene						221.645	228.173	222.465	219.726	258.635	237.427	211.869	226.574	228.314	5.05035	525
ENSMUSG00000037062	Sh3glb1	SH3-domain GRB2-like B1 (endophilin)						220.339	216.754	231.649	212.24	210.858	235.812	248.976	248.348	228.122	5.43736	526
ENSMUSG00000047459	Dynlrb1	dynein light chain roadblock-type 1						225.273	217.213	213.391	216.405	230.356	251.99	235.828	232.866	227.915	4.50718	527
ENSMUSG00000042306	S100a14	S100 calcium binding protein A14						226.517	240.567	207.826	212.667	216.459	240.312	239.15	237.686	227.648	4.8258	528
ENSMUSG00000028692	Akr1a1	aldo-keto reductase family 1, member A1 (aldehyde reductase)						196.172	209.536	226.116	217.619	245.196	239.704	241.666	235.589	226.45	6.15727	529
ENSMUSG00000024740	Ddb1	damage specific DNA binding protein 1						201.515	218.556	227.004	247.015	226.662	210.021	240.561	237.465	226.1	5.50445	530
ENSMUSG00000041736	Tspo	translocator protein						197.878	211.122	201.596	211.224	264.981	254.742	236.233	229.42	225.9	8.75052	531
ENSMUSG00000068220	Lgals1	lectin, galactose binding, soluble 1						203.002	233.049	205.99	212.447	267.996	250.072	210.808	221.27	225.579	8.19141	532
ENSMUSG00000021040	Slirp	SRA stem-loop interacting RNA binding protein						253.02	242.727	244.17	209.627	178.537	217.549	226.32	218.728	223.835	8.39618	533
ENSMUSG00000004264	Phb2	prohibitin 2						201.023	223.472	217.657	223.149	247.547	223.843	228.88	224.204	223.722	4.52557	534
ENSMUSG00000031839	Hsbp1	heat shock factor binding protein 1						225.623	224.435	225.232	214.166	229.142	225.06	228.435	217.316	223.676	1.85219	535
ENSMUSG00000024803	Ankrd1	ankyrin repeat domain 1 (cardiac muscle)						182.446	196.701	210.089	217.68	254.289	232.924	231.255	262.391	223.472	9.66105	536
ENSMUSG00000051695	Pcbp1	poly(rC) binding protein 1						190.859	214.03	225.489	223.268	239.732	229.102	240.975	223.391	223.356	5.60484	537
ENSMUSG00000060373	Hnrnpc	heterogeneous nuclear ribonucleoprotein C						183.338	197.745	214.291	208.564	246.253	231.375	252.319	247.447	222.666	9.02617	538
ENSMUSG00000036372	Tmem258	transmembrane protein 258						194.78	231.272	234.564	211.184	250.726	224.671	216.226	217.572	222.624	5.95209	539
ENSMUSG00000006498	Ptbp1	polypyrimidine tract binding protein 1						184.746	207.276	225.713	234.438	255.37	208.693	230.26	222.407	221.113	7.47127	540
ENSMUSG00000027673	Ndufb5	NADH:ubiquinone oxidoreductase subunit B5						218.196	220.018	229.962	221.242	217.98	228.721	217.128	213.321	220.821	2.03383	541
ENSMUSG00000021764	Ndufs4	NADH:ubiquinone oxidoreductase core subunit S4						212.941	217.121	224.419	200.951	208.117	239.712	232.138	228.925	220.541	4.61938	542
ENSMUSG00000024843	Chka	choline kinase alpha		Unclassified				193.356	211.942	202.449	244.685	216.879	211.56	229.5	252.974	220.418	7.25722	543
ENSMUSG00000109324	Prmt1	protein arginine N-methyltransferase 1						183.815	206.382	200.273	210.73	259.144	237.611	244.747	218.846	220.193	8.88992	544
ENSMUSG00000001175	Calm1	calmodulin 1						173.69	223.618	218.839	235.591	292.431	209.707	189.645	213.947	219.684	12.4725	545
ENSMUSG00000011179	Odc1	ornithine decarboxylase, structural 1						202.327	205.884	215.458	204.838	231.378	227.856	234.538	228.933	218.902	4.69569	546
ENSMUSG00000020265	Sumo3	small ubiquitin-like modifier 3						178.766	207.486	216.115	222.439	267.245	224.351	221.647	211.549	218.7	8.64945	547
ENSMUSG00000020277	Pfkl	phosphofructokinase, liver, B-type		Unclassified				195.805	211.59	219.512	219.027	255.208	211.908	235.032	199.602	218.461	6.79473	548
ENSMUSG00000074896	Ifit3	interferon-induced protein with tetratricopeptide repeats 3						203.87	203.082	214.129	230.575	244.898	202.616	224.409	223.389	218.371	5.386	549
ENSMUSG00000001403	Ube2c	ubiquitin-conjugating enzyme E2C						207.505	210.91	228.728	218.991	239.71	217.695	208.962	212.365	218.108	3.92171	550
ENSMUSG00000027593	Raly	hnRNP-associated with lethal yellow						185.425	207.747	218.486	226.44	253.182	212.194	223.26	217.546	218.035	6.73089	551
ENSMUSG00000028128	F3	coagulation factor III						174.781	181.482	197.735	203.158	314.637	219.437	230.503	219.835	217.696	15.4297	552
ENSMUSG00000045394	Epcam	epithelial cell adhesion molecule						180.01	208.776	206.591	227.754	237.734	218.478	230.642	230.038	217.503	6.60905	553
ENSMUSG00000028070	Naxe	NAD(P)HX epimerase						182.322	201.002	219.206	215.322	246.487	227.997	224.616	218.432	216.923	6.70375	554
ENSMUSG00000029472	Anapc5	anaphase-promoting complex subunit 5						190.035	211.715	223.241	222.459	238.74	215.894	213.548	216.109	216.468	4.83307	555
ENSMUSG00000005125	Ndrg1	N-myc downstream regulated gene 1						189.316	195.853	211.295	200.536	258.38	212.923	246.252	214.583	216.142	8.55832	556
ENSMUSG00000029247	Paics	phosphoribosylaminoimidazole carboxylase, phosphoribosylaminoribosylaminoimidazole, succinocarboxamide synthetase						187.056	203.049	209.528	210.738	220.832	224.431	231.658	240.55	215.98	6.00202	557
ENSMUSG00000029082	Bst1	bone marrow stromal cell antigen 1						173.966	192.468	196.267	211.03	248.995	232.02	231.365	234.7	215.101	9.12156	558
ENSMUSG00000033938	Ndufb7	NADH:ubiquinone oxidoreductase subunit B7						190.895	210.448	212.073	219.057	238.227	229.16	209.308	209.648	214.852	5.04921	559
ENSMUSG00000025980	Hspd1	heat shock protein 1 (chaperonin)						187.324	200.158	214.936	221.051	200.772	211.704	241.845	241.002	214.849	6.85663	560
ENSMUSG00000028333	Anp32b	acidic (leucine-rich) nuclear phosphoprotein 32 family, member B						194.857	199.413	204.377	225.123	209.764	208.942	239.63	235.248	214.669	5.89169	561
ENSMUSG00000041459	Tardbp	TAR DNA binding protein						193.59	193.21	211.101	213.248	197.841	215.231	231.318	254.619	213.77	7.40385	562
ENSMUSG00000022400	Rbx1	ring-box 1						212.396	208.3	201.153	193.464	228.575	221.683	222.183	218.273	213.253	4.17062	563
ENSMUSG00000060860	Ube2s	ubiquitin-conjugating enzyme E2S						182.908	211.663	210.04	217.794	227.214	225.185	220.25	209.806	213.108	4.91396	564
ENSMUSG00000074656	Eif2s2	eukaryotic translation initiation factor 2, subunit 2 (beta)						198.516	197.873	201.699	181.961	198.418	233.152	241.84	248.66	212.765	8.71308	565
ENSMUSG00000068749	Psma5	proteasome (prosome, macropain) subunit, alpha type 5						216.445	196.747	203.875	189.667	199.087	236.34	233.689	225.315	212.646	6.29737	566
ENSMUSG00000026020	Nop58	NOP58 ribonucleoprotein						177.066	201.7	225.914	208.292	220.887	202.949	221.888	241.142	212.48	6.86591	567
ENSMUSG00000024847	Aip	aryl-hydrocarbon receptor-interacting protein						186.137	199.207	196.718	194.521	249.71	237.808	228.718	200.857	211.71	8.30526	568
ENSMUSG00000039016	Timm8b	translocase of inner mitochondrial membrane 8B						228.999	215.286	213.723	203.296	203.046	210.507	208.676	204.134	210.958	3.06224	569
ENSMUSG00000058655	Eif4b	eukaryotic translation initiation factor 4B						184.157	193.142	205.623	210.434	233.712	205.258	233.876	220.051	210.782	6.29954	570
ENSMUSG00000021606	Ndufs6	NADH:ubiquinone oxidoreductase core subunit S6						208.207	203.063	200.054	203.413	213.425	221.234	219.224	209.534	209.769	2.72697	571
ENSMUSG00000025130	P4hb	prolyl 4-hydroxylase, beta polypeptide						190.908	212.636	219.482	223.152	236.3	193.229	207.074	194.7	209.685	5.74636	572
ENSMUSG00000083992	Gm11478	predicted gene 11478						254.742	237.253	219.076	196.682	221.28	195.923	172.1	179.736	209.599	10.0718	573
ENSMUSG00000028156	Eif4e	eukaryotic translation initiation factor 4E						186.526	196.115	202.698	204.988	227.949	222.707	213.818	214.539	208.667	4.86766	574
ENSMUSG00000025492	Ifitm3	interferon induced transmembrane protein 3						221.829	229.547	211.395	236.902	211.225	187.989	176.001	192.745	208.454	7.52162	575
ENSMUSG00000091537	Tma7	translational machinery associated 7						229.399	201.936	214.197	196.243	190.769	210.255	211.043	212.81	208.331	4.23593	576
ENSMUSG00000026701	Prdx6	peroxiredoxin 6						178.139	193.552	203.148	206.806	208.176	218.587	220.27	236.663	208.168	6.28129	577
ENSMUSG00000065126	Snord104	small nucleolar RNA, C/D box 104						137.43	276.985	215.515	316.481	325.636	123.512	114.836	151.763	207.77	31.1625	578
ENSMUSG00000067847	Romo1	reactive oxygen species modulator 1						191.954	207.831	225.939	202.978	242.062	198.583	186.543	198.56	206.806	6.535	579
ENSMUSG00000070167	Snora57	small nucleolar RNA, H/ACA box 57						156.709	181.907	177.696	217.5	252.325	253.249	222.549	186.654	206.073	12.6561	580
ENSMUSG00000016833	Mrps18c	mitochondrial ribosomal protein S18C						201.791	202.002	209.224	188.853	192.847	219.649	206.038	226.213	205.827	4.44359	581
ENSMUSG00000020585	Laptm4a	lysosomal-associated protein transmembrane 4A						162.428	189.576	198.826	206.451	230.785	210.041	224.768	222.31	205.648	7.86923	582
ENSMUSG00000063200	Nol7	nucleolar protein 7						183.797	196.195	201.218	195.865	218.054	220.526	208.782	219.103	205.443	4.72067	583
ENSMUSG00000043866	Taf10	TATA-box binding protein associated factor 10						204.412	203.192	197.304	199.544	229.535	218.592	190.264	193.513	204.545	4.68043	584
ENSMUSG00000071072	Ptges3	prostaglandin E synthase 3						182.507	188.631	198.386	185.295	185.994	224.269	233.157	236.764	204.375	8.16913	585
ENSMUSG00000079477	Rab7	RAB7, member RAS oncogene family						167.949	194.181	197.299	212.195	222.507	214.214	214.605	210.197	204.143	6.13202	586
ENSMUSG00000063787	Chchd1	coiled-coil-helix-coiled-coil-helix domain containing 1						228.741	196.162	183.305	174.561	186.438	226.579	221.332	215.93	204.131	7.59388	587
ENSMUSG00000059005	Hnrnpa3	heterogeneous nuclear ribonucleoprotein A3						197.532	196.53	195.064	200.307	164.802	210.43	219.315	247.397	203.922	8.331	588
ENSMUSG00000038965	Ube2l3	ubiquitin-conjugating enzyme E2L 3						194.81	207.918	207.142	201.118	195.096	203.952	201.659	215.77	203.433	2.45937	589
ENSMUSG00000059518	Znhit1	zinc finger, HIT domain containing 1						197.52	209.345	196.554	196.638	224.867	203.506	202.731	196.029	203.399	3.47985	590
ENSMUSG00000027828	Ssr3	signal sequence receptor, gamma						176.813	187.716	201.981	199.115	187.596	209.965	226.052	234.207	202.931	6.97772	591
ENSMUSG00000022010	Tsc22d1	TSC22 domain family, member 1	TSC22					171.689	191.432	206.793	218.519	196.137	196.956	227.436	213.791	202.844	6.21986	592
ENSMUSG00000071662	Polr2g	polymerase (RNA) II (DNA directed) polypeptide G						178.677	194.299	183.005	186.387	225.087	215.66	218.796	220.392	202.788	6.73853	593
ENSMUSG00000097971	Gm26917	predicted gene, 26917						102.994	254.574	254.82	289.992	422.927	64.406	84.5664	147.097	202.672	43.8425	594
ENSMUSG00000029730	Mcm7	minichromosome maintenance complex component 7						169.236	197.026	199.396	216.462	223.27	204.46	193.888	211.355	201.887	5.86428	595
ENSMUSG00000025809	Itgb1	integrin beta 1 (fibronectin receptor beta)						178.207	196.58	204.382	227.625	193.548	190.625	208.182	215.19	201.792	5.46171	596
ENSMUSG00000022314	Rad21	RAD21 cohesin complex component						180.735	188.656	205.365	207.301	201.866	192.119	213.1	221.108	201.281	4.7274	597
ENSMUSG00000029836	Cbx3	chromobox 3						183.926	185.421	187.97	182.411	171.098	217.947	231.49	247.501	200.971	9.74941	598
ENSMUSG00000006998	Psmd2	proteasome (prosome, macropain) 26S subunit, non-ATPase, 2						175.228	188.823	198.701	201.409	214.801	201.887	222.094	204.615	200.945	5.11851	599
ENSMUSG00000038975	Rabggtb	Rab geranylgeranyl transferase, b subunit						199.698	186.857	194.746	180.749	211.837	212.348	206.115	211.847	200.525	4.30774	600
ENSMUSG00000080893	Gm15920	predicted gene 15920						181.485	193.049	203.185	199.87	230.667	198.251	193.691	200.182	200.047	4.97254	601
ENSMUSG00000019804	Snx3	sorting nexin 3						180.415	190.491	196.016	200.652	211.162	199.124	212.698	208.559	199.89	3.89615	602
ENSMUSG00000041355	Ssr2	signal sequence receptor, beta						168.286	182.019	189.917	202.943	232.418	202.838	211.359	208.94	199.84	6.9528	603
ENSMUSG00000027184	Caprin1	cell cycle associated protein 1						166.689	186.371	194.835	211.715	206.683	195.26	218.897	213.282	199.216	6.05775	604
ENSMUSG00000032249	Anp32a	acidic (leucine-rich) nuclear phosphoprotein 32 family, member A						176.162	180.911	187.068	202.53	213.92	200.162	212.199	218.778	198.966	5.65832	605
ENSMUSG00000021917	Spcs1	signal peptidase complex subunit 1 homolog (S. cerevisiae)						189.701	180.035	185.607	178.231	193.583	229.663	215.935	218.607	198.92	6.94053	606
ENSMUSG00000017188	Coa3	cytochrome C oxidase assembly factor 3						183.88	202.063	210.51	225.749	217.836	186.369	184.143	180.476	198.878	6.21648	607
ENSMUSG00000006143	Upk3bl	uroplakin 3B-like						194.774	191.171	188.341	184.863	230.914	208.584	199.742	184.512	197.863	5.51468	608
ENSMUSG00000033916	Chmp2a	charged multivesicular body protein 2A						183.721	183.473	175.977	169.207	207.241	220.286	219.413	221.438	197.595	7.6969	609
ENSMUSG00000026576	Atp1b1	ATPase, Na+/K+ transporting, beta 1 polypeptide			ATPase Na+/K+ transporting subunits			174.704	188.181	222.29	216.653	182.233	172.973	210.613	210.385	197.254	7.02045	610
ENSMUSG00000037373	Ctbp1	C-terminal binding protein 1						172.982	185.8	199.943	205.691	216.093	202.459	203.181	189.805	196.994	4.76375	611
ENSMUSG00000024038	Ndufv3	NADH:ubiquinone oxidoreductase core subunit V3						203.119	195.645	213.017	195.642	205.043	204.97	172.05	184.666	196.769	4.62924	612
ENSMUSG00000024835	Coro1b	coronin, actin binding protein 1B						163.871	189.964	183.725	193.798	238.755	200.739	206.409	193.158	196.302	7.5479	613
ENSMUSG00000032366	Tpm1	tropomyosin 1, alpha						168.163	181.991	187.018	208.034	211.522	198.393	201.753	211.187	196.008	5.52116	614
ENSMUSG00000028998	Tomm7	translocase of outer mitochondrial membrane 7						210.049	210.349	206.168	192.932	198.16	196.011	175.87	174.111	195.456	5.00483	615
ENSMUSG00000037058	Paip2	polyadenylate-binding protein-interacting protein 2						184.73	189.274	203.449	178.572	195.839	203.523	210.697	193.437	194.94	3.78363	616
ENSMUSG00000043770	Gm12481	predicted gene 12481						151.789	226.204	211.177	218.242	251.715	192.101	172.101	132.412	194.468	14.2097	617
ENSMUSG00000027248	Pdia3	protein disulfide isomerase associated 3						172.623	188.498	199.021	212.226	194.566	188.136	197.157	201.479	194.213	4.10764	618
ENSMUSG00000034932	Mrpl54	mitochondrial ribosomal protein L54						203.459	197.853	186.678	198.852	208.024	195.879	176.004	185.137	193.986	3.74184	619
ENSMUSG00000033475	Tomm6	translocase of outer mitochondrial membrane 6						190.431	186.098	198.798	200.522	196.258	194.595	193.704	190.932	193.917	1.66705	620
ENSMUSG00000016554	Eif3d	eukaryotic translation initiation factor 3, subunit D						170.364	186.536	187.093	194.304	221.876	197.468	201.926	191.138	193.838	5.21344	621
ENSMUSG00000003038	Hmgn2	high mobility group nucleosomal binding domain 2						181.966	175.305	193.195	188.588	186.149	205.196	204.625	213.198	193.528	4.6115	622
ENSMUSG00000019710	Mrpl24	mitochondrial ribosomal protein L24						201.702	187.984	190.178	178.56	191.127	205.829	187.276	201.551	193.026	3.2496	623
ENSMUSG00000079197	Psme2	proteasome (prosome, macropain) activator subunit 2 (PA28 beta)						168.346	188.048	184.877	181.95	212.435	210.861	205.926	191.659	193.013	5.48712	624
ENSMUSG00000015165	Hnrnpl	heterogeneous nuclear ribonucleoprotein L						172.914	176.916	188.178	210.484	214.056	204.164	188.764	187.11	192.823	5.3643	625
ENSMUSG00000062397	Zfp706	zinc finger protein 706						191.935	181.06	180.427	190.246	187.426	197.801	203.575	206.228	192.337	3.39842	626
ENSMUSG00000030738	Eif3c	eukaryotic translation initiation factor 3, subunit C						157.269	189.994	183.584	198.399	206.464	188.674	206.502	205.79	192.084	5.89	627
ENSMUSG00000027067	Ssrp1	structure specific recognition protein 1	HMG					162.29	181.273	191.215	196.988	214.582	182.494	202.491	199.227	191.32	5.64129	628
ENSMUSG00000044303	Cdkn2a	cyclin dependent kinase inhibitor 2A						161.386	182.281	184.472	201.174	235.588	193.345	190.745	177.793	190.848	7.63807	629
ENSMUSG00000034192	Lsm3	LSM3 homolog, U6 small nuclear RNA and mRNA degradation associated						195.043	182.908	188.166	183.277	181.199	206.098	191.967	197.41	190.758	3.03276	630
ENSMUSG00000071076	Jund	jun D proto-oncogene	TF_bZIP					164.087	191.748	201.3	216.08	212.569	181.358	189.814	169.099	190.757	6.67986	631
ENSMUSG00000007815	Rhoa	ras homolog family member A						163.209	181.766	190.749	187.54	192.225	202.47	206.025	200.73	190.589	4.85821	632
ENSMUSG00000026385	Dbi	diazepam binding inhibitor						193.498	182.01	197.052	195.001	197.42	200.191	175.691	182.852	190.464	3.17316	633
ENSMUSG00000027679	Dnajc19	DnaJ heat shock protein family (Hsp40) member C19						198.944	182.513	194.217	175.582	169.993	215.908	180.999	203.231	190.173	5.492	634
ENSMUSG00000000568	Hnrnpd	heterogeneous nuclear ribonucleoprotein D						186.724	175.909	201.036	196.841	178.493	175.526	195.165	210.85	190.068	4.59254	635
ENSMUSG00000019494	Cops6	COP9 signalosome subunit 6						164.455	174.963	182.024	173.76	210.24	206.352	203.025	205.288	190.013	6.38983	636
ENSMUSG00000002524	Puf60	poly-U binding splicing factor 60						154.861	175.302	180.62	191.564	227.408	192.513	202.457	191.695	189.552	7.44424	637
ENSMUSG00000037852	Cpe	carboxypeptidase E						168.535	191.178	184.276	207.403	187.306	192.253	188.577	194.469	189.25	3.84433	638
ENSMUSG00000006699	Cdc42	cell division cycle 42						171.886	176.744	183.131	171.561	177.007	206.899	204.575	221.82	189.203	6.76822	639
ENSMUSG00000027447	Cst3	cystatin C						156.803	178.543	183.503	180.015	232.852	197.654	199.439	182.25	188.882	7.80249	640
ENSMUSG00000020390	Ube2b	ubiquitin-conjugating enzyme E2B						173.581	173.712	181.359	178.458	193.487	193.35	204.626	211.406	188.747	5.04577	641
ENSMUSG00000039128	Cdc123	cell division cycle 123						156.212	178.222	172.856	178.433	200.804	193.042	230.352	199.67	188.699	7.95337	642
ENSMUSG00000031848	Lsm4	LSM4 homolog, U6 small nuclear RNA and mRNA degradation associated						172.565	179.171	175.309	193.897	227.365	200.798	178.769	181.028	188.613	6.48654	643
ENSMUSG00000031633	Slc25a4	solute carrier family 25 (mitochondrial carrier, adenine nucleotide translocator), member 4			Solute carriers			173.549	181.544	179.412	178.532	209.468	193.843	192.58	199.207	188.517	4.33705	644
ENSMUSG00000030120	Mlf2	myeloid leukemia factor 2						161.845	178.583	190.413	195.753	214.032	188.359	190.696	187.445	188.391	5.21477	645
ENSMUSG00000061104	Sap18b	Sin3-associated polypeptide 18B						182.18	182.331	185.399	174.206	193.59	198.378	195.308	193.576	188.121	2.94706	646
ENSMUSG00000027404	Snrpb	small nuclear ribonucleoprotein B						149.531	164.824	175.737	182.414	220.969	201.952	204.736	198.894	187.382	8.31944	647
ENSMUSG00000014956	Ppp1cb	protein phosphatase 1 catalytic subunit beta						179.775	170.231	191.144	174.706	165.768	193.601	205.612	217.84	187.335	6.39847	648
ENSMUSG00000006050	Sra1	steroid receptor RNA activator 1						170.849	170.607	174.835	170.073	186.24	204.133	213.881	207.961	187.322	6.57287	649
ENSMUSG00000028645	Slc2a1	solute carrier family 2 (facilitated glucose transporter), member 1			Solute carriers			162.813	174.069	182.754	197.85	236.033	175.78	190.37	175.535	186.901	7.97409	650
ENSMUSG00000028029	Aimp1	aminoacyl tRNA synthetase complex-interacting multifunctional protein 1						187.394	175.676	183.854	172.504	195.709	191.426	197.681	190.831	186.884	3.19743	651
ENSMUSG00000031708	Tecr	trans-2,3-enoyl-CoA reductase						156.237	168.101	187.628	207.709	224.166	185.45	179.668	183.488	186.556	7.5368	652
ENSMUSG00000030357	Fkbp4	FK506 binding protein 4						148.779	179.75	174.153	184.045	208.006	197.231	204.47	190.128	185.82	6.73071	653
ENSMUSG00000020368	Canx	calnexin						173.51	182.972	183.105	202.19	184.48	171.055	192.566	193.446	185.415	3.6771	654
ENSMUSG00000045983	Eif4g1	eukaryotic translation initiation factor 4, gamma 1						164.799	179.89	200.018	216.996	169.509	167.076	195.791	188.918	185.375	6.51296	655
ENSMUSG00000113902	Ndufb1-ps	NADH:ubiquinone oxidoreductase subunit B1						203.68	193.255	192.159	180.799	165.703	181.371	168.209	196.911	185.261	4.80846	656
ENSMUSG00000050608	Minos1	mitochondrial inner membrane organizing system 1						194.239	178.615	189.001	155.999	176.72	205.106	192.62	181.744	184.256	5.21026	657
ENSMUSG00000002477	Snrpd1	small nuclear ribonucleoprotein D1						178.32	164.49	179.202	165.062	192.458	197.019	192.009	203.936	184.062	5.17059	658
ENSMUSG00000023951	Vegfa	vascular endothelial growth factor A						158.078	169.847	184.306	204.845	252.705	159.14	180.845	156.802	183.321	11.4885	659
ENSMUSG00000020803	Txndc17	thioredoxin domain containing 17						191.035	178.184	176.955	176.745	172.18	191.467	186.422	190.426	182.927	2.7353	660
ENSMUSG00000021178	Psmc1	protease (prosome, macropain) 26S subunit, ATPase 1						150.794	171.325	187.525	172.037	190.5	198.178	187.48	201.596	182.429	5.92223	661
ENSMUSG00000019916	P4ha1	procollagen-proline, 2-oxoglutarate 4-dioxygenase (proline 4-hydroxylase), alpha 1 polypeptide						164.999	175.587	190.901	179.308	205.415	171.653	201.74	168.824	182.303	5.40247	662
ENSMUSG00000022551	Cyc1	cytochrome c-1						153.32	168.519	172.758	163.986	226.469	190.384	197.892	184.269	182.2	8.14968	663
ENSMUSG00000017677	Wsb1	WD repeat and SOCS box-containing 1						155.72	165.561	172.671	189.204	212.626	172.552	203.47	185.689	182.187	6.81557	664
ENSMUSG00000029561	Oasl2	2'-5' oligoadenylate synthetase-like 2						159.804	202.011	162.957	200.833	201.898	168.98	184.489	173.002	181.747	6.35628	665
ENSMUSG00000063659	Zbtb18	zinc finger and BTB domain containing 18	ZBTB					175.018	145.033	187.99	214.904	222.402	143.524	145.476	214.053	181.05	11.9528	666
ENSMUSG00000087260	Lamtor5	late endosomal/lysosomal adaptor, MAPK and MTOR activator 5						180.119	170.477	180.002	170.937	171.507	200.321	184.998	189.723	181.01	3.70625	667
ENSMUSG00000027942	4933434E20Rik	RIKEN cDNA 4933434E20 gene						145.211	172.986	170.561	176.973	196.671	188.944	202.829	191.722	180.737	6.50532	668
ENSMUSG00000055436	Srsf11	serine/arginine-rich splicing factor 11						167.315	153.562	178.925	196.225	195.663	163.619	190.154	199.776	180.655	6.16542	669
ENSMUSG00000030417	Pdcd5	programmed cell death 5						171.277	189.829	186.893	177.211	182.414	177.898	174.577	182.367	180.308	2.20585	670
ENSMUSG00000062981	Mrpl42	mitochondrial ribosomal protein L42						175.69	176.198	173.534	174.147	181.302	186.932	187.529	184.101	179.929	2.0368	671
ENSMUSG00000024853	Sf3b2	splicing factor 3b, subunit 2						150.272	169.607	179.42	198.515	198.73	170.316	188.405	182.476	179.718	5.75645	672
ENSMUSG00000019997	Ccn2	cellular communication network factor 1						141.284	163.668	158.505	208.878	207.281	168.696	185.839	200.812	179.37	8.86177	673
ENSMUSG00000016427	Ndufa1	NADH:ubiquinone oxidoreductase subunit A1						163.447	185.957	175.069	166.847	179.77	195.25	194.417	171.594	179.044	4.24814	674
ENSMUSG00000054808	Actn4	actinin alpha 4						164.857	167.257	179.407	196.798	217.391	163.481	176.972	164.714	178.86	6.7844	675
ENSMUSG00000041203	Trir	telomerase RNA component interacting RNase						159.062	172.079	186.135	172.922	203.321	174.923	185.259	176.734	178.804	4.60095	676
ENSMUSG00000024949	Sf1	splicing factor 1						167.098	168.586	201.644	193.468	180.404	165.326	174.851	178.618	178.749	4.58644	677
ENSMUSG00000005103	Wdr1	WD repeat domain 1						160.497	170.661	176.897	179.157	181.893	191.529	185.76	183.382	178.722	3.39634	678
ENSMUSG00000030591	Psmd8	proteasome (prosome, macropain) 26S subunit, non-ATPase, 8						161.069	172.633	172.382	171.945	197.576	191.585	181.391	181.12	178.713	4.15895	679
ENSMUSG00000002379	Ndufa11	NADH:ubiquinone oxidoreductase subunit A11						155.958	171.028	169.981	174.725	210.411	187.79	179.592	179.369	178.607	5.60179	680
ENSMUSG00000029394	Cdk2ap1	CDK2 (cyclin-dependent kinase 2)-associated protein 1						170.415	173.355	179.508	185.342	190.837	181.767	180.174	165.883	178.41	2.87991	681
ENSMUSG00000028648	Ndufs5	NADH:ubiquinone oxidoreductase core subunit S5						173.873	172.35	177.866	167.542	193.92	180.252	181.169	179.921	178.362	2.76957	682
ENSMUSG00000057346	Apol9a	apolipoprotein L 9a						150.673	181.109	160.154	198.05	204.236	177.34	183.996	171.132	178.336	6.33566	683
ENSMUSG00000022427	Tomm22	translocase of outer mitochondrial membrane 22						182.873	163.905	174.648	173.616	173.977	185.574	185.649	183.652	177.987	2.72834	684
ENSMUSG00000030751	Psma1	proteasome (prosome, macropain) subunit, alpha type 1						154.864	162.776	169.454	151.003	180.994	205.835	191.991	202.151	177.384	7.47453	685
ENSMUSG00000029152	Ociad1	OCIA domain containing 1						154.374	160.956	157.716	172.917	201.615	189.028	181.902	200.214	177.34	6.64194	686
ENSMUSG00000008892	Vdac3	voltage-dependent anion channel 3				Voltage dependent anion channels		164.384	168.368	165.305	162.475	169.742	191.769	192.26	203.029	177.167	5.60987	687
ENSMUSG00000068882	Ssb	Sjogren syndrome antigen B						141.28	166.433	156.871	155.872	182.894	196.429	207.141	209.269	177.024	9.06449	688
ENSMUSG00000036606	Plxnb2	plexin B2						158.504	170.701	178.65	205.095	183.302	161.605	180.339	170.153	176.043	5.17766	689
ENSMUSG00000022216	Psme1	proteasome (prosome, macropain) activator subunit 1 (PA28 alpha)						151.431	159.074	172.963	168.456	203.254	178.627	187.443	184.339	175.698	5.83359	690
ENSMUSG00000034120	Srsf2	serine/arginine-rich splicing factor 2						142.174	166.547	175.697	184.016	181.008	177.278	181.978	193.45	175.269	5.44541	691
ENSMUSG00000028410	Dnaja1	DnaJ heat shock protein family (Hsp40) member A1						143.705	172.877	172.213	176.572	179.482	168.448	182.658	205.971	175.241	6.08653	692
ENSMUSG00000023104	Rfc2	replication factor C (activator 1) 2						164.666	176.792	168.675	173.226	193.284	177.996	174.188	172.63	175.182	2.99538	693
ENSMUSG00000023367	Tmem176a	transmembrane protein 176A						155.13	162.786	191.052	179.564	207.4	167.838	170.223	162.984	174.622	6.10854	694
ENSMUSG00000043889	Gm8399	predicted gene 8399						121.374	179.745	184.143	193.693	281.763	142.459	146.552	143.685	174.177	17.7146	695
ENSMUSG00000026032	Ndufb3	NADH:ubiquinone oxidoreductase subunit B3						175.104	174.802	170.139	165.299	165.941	179.862	173.06	186.42	173.828	2.48813	696
ENSMUSG00000052397	Ezr	ezrin						159.762	178.211	179.625	192.367	173.764	160.438	172.95	173.377	173.812	3.71926	697
ENSMUSG00000026278	Bok	BCL2-related ovarian killer						154.836	162.431	162.036	164.358	210.09	174.715	187.853	172.55	173.609	6.31464	698
ENSMUSG00000056076	Eif3b	eukaryotic translation initiation factor 3, subunit B						143.081	165.811	174.945	190.986	184.661	167.444	185.367	175.315	173.451	5.34127	699
ENSMUSG00000061613	U2af1	U2 small nuclear ribonucleoprotein auxiliary factor (U2AF) 1						155.189	170.526	168.795	177.824	190.57	170.017	174.252	179.498	173.334	3.59773	700
ENSMUSG00000029623	Pdap1	PDGFA associated protein 1						150.98	172.748	166.242	175.367	193.268	167.619	175.917	179.517	172.707	4.28096	701
ENSMUSG00000025381	Cnpy2	canopy FGF signaling regulator 2						153.131	165.478	163.14	160.185	195.175	184.32	185.89	173.868	172.648	5.17309	702
ENSMUSG00000020737	Jpt1	Jupiter microtubule associated homolog 1						155.552	162.438	163.461	177.137	182.528	191.36	179.381	168.204	172.508	4.25473	703
ENSMUSG00000000346	Dazap2	DAZ associated protein 2						152.012	155.643	167.497	162.091	179.465	182.797	190.235	186.322	172.008	5.16766	704
ENSMUSG00000086290	Snhg12	small nucleolar RNA host gene 12						192.302	182.326	171.092	162.581	157.974	180.486	161.417	167.689	171.983	4.24199	705
ENSMUSG00000030795	Fus	fused in sarcoma						139.231	157.165	175.923	203.417	192.196	156.412	171.366	177.926	171.705	7.29721	706
ENSMUSG00000049760	2410015M20Rik	RIKEN cDNA 2410015M20 gene						176.52	163.546	181.628	173.195	203.773	150.598	163.684	160.548	171.686	5.75255	707
ENSMUSG00000019432	Ddx39b	DEAD (Asp-Glu-Ala-Asp) box polypeptide 39B						137.559	151.79	162.21	180.332	216.449	164.396	181.294	177.494	171.44	8.35319	708
ENSMUSG00000009291	Pttg1ip	pituitary tumor-transforming 1 interacting protein						149.429	157.256	179.585	176.15	190.909	167.262	181.497	169.21	171.412	4.77493	709
ENSMUSG00000024991	Eif3a	eukaryotic translation initiation factor 3, subunit A						159.58	165.878	175.875	191.828	152.488	153.984	185.024	184.949	171.201	5.40729	710
ENSMUSG00000028964	Park7	Parkinson disease (autosomal recessive, early onset) 7						145.83	161.704	158.96	159.117	184.673	189.716	186.774	177.417	170.524	5.7189	711
ENSMUSG00000024097	Srsf7	serine/arginine-rich splicing factor 7						142.49	157.033	158.248	168.257	186.552	181.055	186.954	182.906	170.437	5.84742	712
ENSMUSG00000028066	Pmf1	polyamine-modulated factor 1						154.466	151.709	168.754	175.124	194.188	176.539	174.387	167.094	170.282	4.74063	713
ENSMUSG00000024387	Csnk2b	casein kinase 2, beta polypeptide		Unclassified				154.63	161.898	168.527	167.099	188.794	175.238	176.191	169.521	170.237	3.61358	714
ENSMUSG00000017466	Timp2	tissue inhibitor of metalloproteinase 2						144.151	166.416	164.43	169.924	178.909	175.906	181.754	179.667	170.145	4.34602	715
ENSMUSG00000026355	Mcm6	minichromosome maintenance complex component 6						139.66	154.172	164.324	173.926	181.292	171.135	188.831	186.566	169.988	5.94102	716
ENSMUSG00000033940	Brk1	BRICK1, SCAR/WAVE actin-nucleating complex subunit						167.798	167.051	170.174	168.159	172.022	168.798	179.407	165.654	169.883	1.52225	717
ENSMUSG00000015714	Cers2	ceramide synthase 2	Homeobox					134.523	152.873	166.253	174.612	198.407	171.732	177.027	181.312	169.592	6.77866	718
ENSMUSG00000023939	Mrpl14	mitochondrial ribosomal protein L14						167.767	170.517	176.294	159.414	185.759	174.002	161.897	156.364	169.002	3.44589	719
ENSMUSG00000042737	Dpm3	dolichyl-phosphate mannosyltransferase polypeptide 3						168.999	175.174	164.094	179.39	187.769	174.399	158.735	142.772	168.916	4.9004	720
ENSMUSG00000034349	Smc4	structural maintenance of chromosomes 4						156.395	160.841	163.898	159.858	150.807	174.776	182.145	202.017	168.842	5.91923	721
ENSMUSG00000045763	Basp1	brain abundant, membrane attached signal protein 1						144.064	164.76	167.469	183.11	183.329	166.239	168.205	171.357	168.567	4.34832	722
ENSMUSG00000031954	Cfdp1	craniofacial development protein 1						148.587	162.4	153.633	155.873	175.214	181.396	183.584	186.946	168.454	5.33412	723
ENSMUSG00000026021	Sumo1	small ubiquitin-like modifier 1						171.31	155.675	165.655	149.431	149.778	181.383	181.202	189.81	168.031	5.46791	724
ENSMUSG00000005881	Ergic3	ERGIC and golgi 3						153.568	169.841	162.744	166.706	196.135	177.941	168.781	146.706	167.803	5.32028	725
ENSMUSG00000020458	Rtn4	reticulon 4						136.602	156.68	171.77	171.741	170.954	172.285	177.172	176.926	166.766	4.85673	726
ENSMUSG00000063015	Ccni	cyclin I						165.437	162.373	168.993	162.558	157.169	168.105	179.254	170.218	166.763	2.33556	727
ENSMUSG00000060147	Serpinb6a	serine (or cysteine) peptidase inhibitor, clade B, member 6a						162.68	164.949	161.077	154.843	164.062	184.024	166.905	173.278	166.477	3.10932	728
ENSMUSG00000059278	Naa38	N(alpha)-acetyltransferase 38, NatC auxiliary subunit						157.083	168.649	175.369	160.057	188.594	166.922	161.309	153.09	166.384	4.02779	729
ENSMUSG00000110386	Gm42031	predicted gene, 42031						181.37	181.556	184.646	184.92	133.426	137.282	152.192	174.873	166.283	7.72101	730
ENSMUSG00000035048	Anapc13	anaphase promoting complex subunit 13						185.846	171.518	158.929	158.934	162.596	172.586	168.73	150.548	166.211	3.83843	731
ENSMUSG00000062867	Impdh2	inosine monophosphate dehydrogenase 2						160.67	157.167	161.493	157.219	171.783	173.129	173.874	162.597	164.742	2.49647	732
ENSMUSG00000040483	Xaf1	XIAP associated factor 1						149.383	171.099	157.127	161.23	181.007	164.492	159.508	173.944	164.724	3.59393	733
ENSMUSG00000010406	Mrpl52	mitochondrial ribosomal protein L52						168.403	166.283	161.811	165.559	173.079	164.137	152.766	159.973	164.001	2.14098	734
ENSMUSG00000018379	Srsf1	serine/arginine-rich splicing factor 1						137.301	148.246	167.935	190.652	175.674	153.143	170.125	168.514	163.949	5.97446	735
ENSMUSG00000061032	Rrp1	ribosomal RNA processing 1 homolog (S. cerevisiae)						138.78	158.9	158.292	174.642	194.616	165.824	159.719	160.26	163.879	5.63901	736
ENSMUSG00000030342	Cd9	CD9 antigen						135.114	146.506	150.036	158.15	177.252	175.526	182.863	182.01	163.432	6.48592	737
ENSMUSG00000006412	Pfdn2	prefoldin 2						147.599	161.39	152.937	156.802	193.777	162.312	167.803	162.629	163.156	4.91025	738
ENSMUSG00000039168	Dap	death-associated protein						149.69	148.153	159.552	171.759	160.904	169.121	171.436	171.402	162.752	3.45721	739
ENSMUSG00000004665	Cnn2	calponin 2						154.113	154.803	156.028	158.777	196.619	167.463	160.174	153.793	162.721	5.09709	740
ENSMUSG00000025016	Tm9sf3	transmembrane 9 superfamily member 3						149.589	153.089	159.821	168.385	150.736	163.512	170.155	185.175	162.558	4.24521	741
ENSMUSG00000031231	Cox7b	cytochrome c oxidase subunit 7B						162.889	166.753	182.35	154.742	145.606	155.648	156.174	175.283	162.431	4.24307	742
ENSMUSG00000094724	Rnaset2b	ribonuclease T2B						142.549	165.65	160.112	169.514	198.058	153.228	150.122	159.152	162.298	5.94214	743
ENSMUSG00000060739	Nsa2	NSA2 ribosome biogenesis homolog						161.662	158.977	155.939	158.05	165.372	160.753	160.225	175.012	161.999	2.10006	744
ENSMUSG00000028932	Psmc2	proteasome (prosome, macropain) 26S subunit, ATPase 2						140.593	155.692	156.303	157.942	164.919	173.4	174.752	171.991	161.949	4.11418	745
ENSMUSG00000084838	Gm10241	predicted pseudogene 10241						132.009	166.527	139.096	216.811	225.024	164.183	92.702	158.183	161.817	15.3774	746
ENSMUSG00000041126	H2afv	H2A histone family, member V						137.311	163.876	169.232	174.382	186.499	170.524	143.926	148.199	161.744	5.98828	747
ENSMUSG00000031879	Ciao2b	cytosolic iron-sulfur assembly component 2B						152.727	157.941	159.012	146.888	180.053	169.808	166.689	160.174	161.662	3.66217	748
ENSMUSG00000005846	Rsl1d1	ribosomal L1 domain containing 1						133.081	154.156	155.532	149.22	157.282	170.446	181.048	191.196	161.495	6.5599	749
ENSMUSG00000021831	Ero1l	ERO1-like (S. cerevisiae)						150.376	154.393	164.892	151.839	178.11	151.151	182.042	158.8	161.45	4.41444	750
ENSMUSG00000052456	Asna1	arsA arsenite transporter, ATP-binding, homolog 1 (bacterial)						142.74	155.796	148.153	148.853	189.535	172.816	169.503	164.122	161.44	5.52187	751
ENSMUSG00000038845	Phb	prohibitin						116.667	150.619	170.798	164.692	170.048	191.219	167.894	156.261	161.025	7.61562	752
ENSMUSG00000031584	Gsr	glutathione reductase						140.321	151.401	150.145	167.434	157.79	178.965	175.69	164.899	160.831	4.71097	753
ENSMUSG00000024925	Rnaseh2c	ribonuclease H2, subunit C						136.349	161.535	151.536	171.738	209.269	143.696	157.108	155.222	160.807	7.89481	754
ENSMUSG00000075279	Mrpl23-ps1	mitichondrial ribosomal protein L23, pseudogene 1						165.202	156.858	162.683	144.23	144.922	181.079	162.997	165.976	160.493	4.241	755
ENSMUSG00000064068	Mtx1	metaxin 1						123.093	137.088	152.992	155.767	189.839	174.188	185.064	165.5	160.442	8.13136	756
ENSMUSG00000021771	Vdac2	voltage-dependent anion channel 2				Voltage dependent anion channels		150.525	148.075	157.764	143.769	165.542	177.674	171.208	165.883	160.055	4.23358	757
ENSMUSG00000028124	Gclm	glutamate-cysteine ligase, modifier subunit						148.264	145.992	162.426	158.552	159.932	164.456	171.026	168.328	159.872	3.14134	758
ENSMUSG00000028798	Eif3i	eukaryotic translation initiation factor 3, subunit I						157.005	156.789	154.945	151.564	186.772	162.224	157.364	151.096	159.72	4.06048	759
ENSMUSG00000023067	Cdkn1a	cyclin-dependent kinase inhibitor 1A (P21)						133.862	145.183	154.162	165.489	185.752	160.155	171.785	160.489	159.609	5.61893	760
ENSMUSG00000029328	Hnrnpdl	heterogeneous nuclear ribonucleoprotein D-like						143.995	140.499	166.855	159.071	174.049	155.535	171.668	164.632	159.538	4.34559	761
ENSMUSG00000040048	Ndufb10	NADH:ubiquinone oxidoreductase subunit B10						153.369	149.037	149.731	146.001	162.646	173.032	177.314	164.817	159.493	4.14761	762
ENSMUSG00000054717	Hmgb2	high mobility group box 2	HMG					130.951	142.127	157.113	147.595	184.695	163.038	170.578	175.967	159.008	6.41371	763
ENSMUSG00000059743	Fdps	farnesyl diphosphate synthetase						135.356	148.397	166.409	162.689	169.936	157.195	169.742	161.784	158.938	4.1959	764
ENSMUSG00000002102	Psmc3	proteasome (prosome, macropain) 26S subunit, ATPase 3						135.969	150.877	151.005	155.412	177.619	165.421	163.779	169.045	158.641	4.59778	765
ENSMUSG00000028945	Rheb	Ras homolog enriched in brain						155.741	134.209	151.659	136.887	140.37	190.624	178.819	179.998	158.538	7.73126	766
ENSMUSG00000034088	Hdlbp	high density lipoprotein (HDL) binding protein						143.308	156.029	161.582	168.729	158.313	153.714	164.541	159.861	158.26	2.71199	767
ENSMUSG00000001158	Snrnp27	small nuclear ribonucleoprotein 27 (U4/U6.U5)						143.161	150.957	147.469	140.055	162.908	171.707	170.322	178.843	158.178	5.17671	768
ENSMUSG00000031696	Vps35	VPS35 retromer complex component						138.688	142.899	153.362	148.489	151.132	169.271	174.008	187.244	158.137	5.97388	769
ENSMUSG00000027405	Nop56	NOP56 ribonucleoprotein						126.896	153.452	148.808	163.834	176.338	153.655	171.774	165.703	157.557	5.52485	770
ENSMUSG00000025135	Anapc11	anaphase promoting complex subunit 11						155.026	145.15	163.441	155.659	172.698	158.376	156.247	153.197	157.474	2.83206	771
ENSMUSG00000025630	Hprt	hypoxanthine guanine phosphoribosyl transferase						132.161	136.27	142.24	130.974	151.129	189.445	186.645	190.607	157.434	9.48288	772
ENSMUSG00000022295	Atp6v1c1	ATPase, H+ transporting, lysosomal V1 subunit C1						132.051	144.199	159.955	150.41	174.031	169.767	166.904	161.617	157.367	5.01756	773
ENSMUSG00000026078	Pdcl3	phosducin-like 3						124.642	145.631	141.487	141.802	181.654	171.616	172.943	177.613	157.173	7.49792	774
ENSMUSG00000005873	Reep5	receptor accessory protein 5						129.959	164.471	159.003	162.138	180.504	150.051	148.977	160.254	156.92	5.16354	775
ENSMUSG00000068921	Dap3	death associated protein 3						139.614	145.877	156.443	150.902	164.464	169.233	174.512	154.186	156.904	4.19054	776
ENSMUSG00000024640	Psat1	phosphoserine aminotransferase 1						127.945	151.326	156.842	162.422	170.013	155.65	164.779	164.655	156.704	4.62016	777
ENSMUSG00000022338	Eny2	ENY2 transcription and export complex 2 subunit						158.327	138.997	155.965	163	128.75	171.714	161.895	169.285	155.992	5.25129	778
ENSMUSG00000096755	Ftl1-ps2	ferritin light polypeptide, pseudogene 2						137.368	182.668	196.213	188.657	203.66	111.815	106.391	120.573	155.918	14.4431	779
ENSMUSG00000074781	Ube2n	ubiquitin-conjugating enzyme E2N						147.519	142.35	151.906	146.057	149.702	160.6	171.708	176.666	155.813	4.44863	780
ENSMUSG00000032216	Nedd4	neural precursor cell expressed, developmentally down-regulated 4						137.066	146.127	161.997	180.914	151.646	145.262	161.001	161.308	155.665	4.81667	781
ENSMUSG00000027282	Mtch2	mitochondrial carrier 2			Solute carriers			135.267	134.376	150.419	144.446	158.255	165.475	176.687	179.78	155.588	6.19485	782
ENSMUSG00000038467	Chmp4b	charged multivesicular body protein 4B						131.575	154.088	156.092	163.523	178.396	157.664	160	142.724	155.508	4.91259	783
ENSMUSG00000020153	Ndufs7	NADH:ubiquinone oxidoreductase core subunit S7						137.92	152.95	151.031	156.228	187.155	152.679	151.842	147.716	154.69	5.02634	784
ENSMUSG00000030654	Arl6ip1	ADP-ribosylation factor-like 6 interacting protein 1						126.695	135.914	169.982	160.942	155.952	162.932	178.294	146.246	154.62	6.13414	785
ENSMUSG00000004268	Emg1	EMG1 N1-specific pseudouridine methyltransferase						149.126	143.688	152.467	143.019	166.832	164.495	160.921	156.305	154.607	3.21301	786
ENSMUSG00000031146	Plp2	proteolipid protein 2						136.498	143.488	154.811	156.431	159.363	155.282	164.335	165.576	154.473	3.51739	787
ENSMUSG00000024767	Otub1	OTU domain, ubiquitin aldehyde binding 1						135.883	150.158	145.483	144.714	170.518	163.416	163.496	160.702	154.296	4.22082	788
ENSMUSG00000005514	Por	P450 (cytochrome) oxidoreductase						141.528	151.076	151.683	171.412	166.599	152.805	147.681	150.517	154.163	3.49661	789
ENSMUSG00000019173	Rab5c	RAB5C, member RAS oncogene family						130.362	153.982	156.221	157.692	174.421	151.487	156.281	149.088	153.692	4.2871	790
ENSMUSG00000070319	Eif3g	eukaryotic translation initiation factor 3, subunit G						135.976	146.745	142.508	148.243	174.45	159.88	162.489	158.134	153.553	4.39765	791
ENSMUSG00000022443	Myh9	myosin, heavy polypeptide 9, non-muscle						138.522	152.723	157.578	181.671	157.152	139.61	150.496	150.185	153.492	4.74622	792
ENSMUSG00000021910	Nisch	nischarin						138.569	146.988	153.089	170.258	162.948	131.659	163.214	161.192	153.49	4.75503	793
ENSMUSG00000009549	Srp14	signal recognition particle 14						148.512	149.979	155.424	142.492	158.702	157.362	159.387	152.411	153.033	2.06252	794
ENSMUSG00000055681	Cope	coatomer protein complex, subunit epsilon						141.127	150.844	146.742	133.457	176.824	158.721	166.024	148.06	152.725	4.92884	795
ENSMUSG00000008958	Vps72	vacuolar protein sorting 72						136.979	147.242	148.328	152.701	173.859	152.733	163.922	142.306	152.259	4.17509	796
ENSMUSG00000040562	Gstm2	glutathione S-transferase, mu 2						136.263	140.766	143.318	151.662	165.028	154.426	157.105	165.999	151.821	3.88845	797
ENSMUSG00000019210	Atp6v1e1	ATPase, H+ transporting, lysosomal V1 subunit E1						125.776	141.013	145.522	140.773	158.088	166.585	169.792	166.856	151.801	5.61119	798
ENSMUSG00000020108	Ddit4	DNA-damage-inducible transcript 4						119.801	143.381	144.207	144.815	198.42	148.551	170.141	140.385	151.213	8.29063	799
ENSMUSG00000074457	S100a16	S100 calcium binding protein A16						142.708	148.728	151.966	148.039	160.956	151.529	151.259	152.377	150.945	1.81741	800
ENSMUSG00000004626	Stxbp2	syntaxin binding protein 2						132.416	139.686	146.589	161.473	190.659	139.337	153.592	136.048	149.975	6.72575	801
ENSMUSG00000001627	Ifrd1	interferon-related developmental regulator 1						125.156	136.924	147.052	134.411	136.816	167.096	165.931	184.66	149.756	7.27105	802
ENSMUSG00000021248	Tmed10	transmembrane p24 trafficking protein 10						133.592	138.863	152.467	156.38	164.577	144.445	152.649	152.544	149.44	3.52135	803
ENSMUSG00000023089	Ndufa5	NADH:ubiquinone oxidoreductase subunit A5						156.794	138.56	170.796	158.28	171.373	128.369	137.28	131.534	149.123	6.12283	804
ENSMUSG00000033355	Rtp4	receptor transporter protein 4						137.393	139.916	134.817	143.976	159.557	160.316	159.979	156.098	149.006	3.90525	805
ENSMUSG00000056209	Npm3	nucleoplasmin 3						132.49	143.022	144.802	152.729	172.189	143.44	155.038	148.291	149	4.10892	806
ENSMUSG00000020440	Arf5	ADP-ribosylation factor 5						144.692	145.234	147.97	148.957	153.558	158.588	153.356	138.383	148.842	2.22814	807
ENSMUSG00000079562	Maea	macrophage erythroblast attacher						126.403	141.932	145.166	151.93	172.965	144.782	153.591	153.821	148.824	4.66762	808
ENSMUSG00000001123	Lgals9	lectin, galactose binding, soluble 9						128.257	141.347	136.856	146.399	159.901	155.502	163.189	158.722	148.772	4.43128	809
ENSMUSG00000037364	Srrt	serrate RNA effector molecule homolog (Arabidopsis)						115.355	131.009	154.947	162.512	193.632	133.113	147.512	149.587	148.458	8.36476	810
ENSMUSG00000028851	Nudc	nudC nuclear distribution protein						119.897	142.334	145.573	152.713	177.384	146.171	157.266	144.025	148.17	5.69802	811
ENSMUSG00000022635	Zcrb1	zinc finger CCHC-type and RNA binding motif 1						142.965	139.976	143.739	141.305	144.624	153.322	158.541	159.928	148.05	2.82148	812
ENSMUSG00000034855	Cxcl10	chemokine (C-X-C motif) ligand 10						135.802	127.389	137.411	132.012	207.062	152.557	141.042	150.767	148.005	8.97068	813
ENSMUSG00000024583	Txnl1	thioredoxin-like 1						126.267	132.504	147.266	137.043	147.186	160.662	168.639	163.818	147.923	5.46121	814
ENSMUSG00000021116	Eif2s1	eukaryotic translation initiation factor 2, subunit 1 alpha						120.891	126.274	128.003	124.395	155.05	167.997	178.837	180.877	147.791	9.10758	815
ENSMUSG00000027406	Idh3b	isocitrate dehydrogenase 3 (NAD+) beta						133.375	141.117	141.432	147.152	175.491	148.272	146.069	148.727	147.705	4.35987	816
ENSMUSG00000031311	Nono	non-POU-domain-containing, octamer binding protein						129.358	138.249	143.305	155.841	162.499	147.112	151.034	153.762	147.645	3.72861	817
ENSMUSG00000020152	Actr2	ARP2 actin-related protein 2						138.912	139.574	146.029	144.114	126.767	153.778	160.924	169.343	147.43	4.77486	818
ENSMUSG00000041782	Lad1	ladinin						128.153	138.64	145.252	158.181	158.02	148.422	158.055	144.259	147.373	3.79194	819
ENSMUSG00000018585	Atox1	antioxidant 1 copper chaperone						154.583	159.748	148.49	152.678	142.482	148.923	131.538	140.331	147.347	3.16557	820
ENSMUSG00000028837	Psmb2	proteasome (prosome, macropain) subunit, beta type 2						131.714	136.492	143.209	141.801	169.248	160.833	143.45	149.99	147.092	4.41854	821
ENSMUSG00000022500	Litaf	LPS-induced TN factor	zf-LITAF-like					130.901	141.448	149.551	168.951	165.588	138.616	145.137	135.926	147.015	4.85556	822
ENSMUSG00000068874	Selenbp1	selenium binding protein 1						136.62	133.661	147.021	132.871	163.186	150.426	164.859	146.129	146.847	4.38866	823
ENSMUSG00000078427	Sarnp	SAP domain containing ribonucleoprotein						142.228	136.786	138.5	133.672	128.192	167.536	164.403	163.084	146.8	5.5319	824
ENSMUSG00000024758	Rtn3	reticulon 3						125.673	138.696	149.112	154.173	154.012	142.109	152.565	157.797	146.767	3.77944	825
ENSMUSG00000029918	Mrps33	mitochondrial ribosomal protein S33						142.937	143.776	146.897	131.281	140.149	163.173	143.217	162.272	146.713	3.84846	826
ENSMUSG00000028745	Capzb	capping protein (actin filament) muscle Z-line, beta						129.194	134.665	144.593	136.124	168.972	155.617	157.531	145.149	146.48	4.74814	827
ENSMUSG00000026150	Mff	mitochondrial fission factor						131.335	146.199	156.673	151.438	158.702	134.136	141.156	151.284	146.365	3.56319	828
ENSMUSG00000013593	Ndufs2	NADH:ubiquinone oxidoreductase core subunit S2						134.027	139.993	141.24	143.003	158.674	154.622	156.719	141.142	146.177	3.23013	829
ENSMUSG00000020321	Mdh1	malate dehydrogenase 1, NAD (soluble)						109.617	129.998	143.78	141.161	170.463	156.203	166.158	151.199	146.072	7.00002	830
ENSMUSG00000051223	Bzw1	basic leucine zipper and W2 domains 1						123.805	135.768	144.107	145.289	139.887	153.185	159.343	166.838	146.028	4.82305	831
ENSMUSG00000031029	Eif3f	eukaryotic translation initiation factor 3, subunit F						168.092	148.126	147.446	139.437	142.203	145.229	140.652	137.016	146.025	3.4384	832
ENSMUSG00000031591	Asah1	N-acylsphingosine amidohydrolase 1						126.182	140.451	141.307	147.57	130.894	158.556	145.856	176.91	145.966	5.65267	833
ENSMUSG00000020098	Pcbd1	pterin 4 alpha carbinolamine dehydratase/dimerization cofactor of hepatocyte nuclear factor 1 alpha (TCF1) 1						145.829	138.475	144.272	136.787	146.73	158.708	147.369	149.486	145.957	2.39244	834
ENSMUSG00000020180	Snrpd3	small nuclear ribonucleoprotein D3						123.226	145.765	145.667	137.123	170.404	144.696	137.291	160.428	145.575	5.13638	835
ENSMUSG00000027613	Eif6	eukaryotic translation initiation factor 6						119.675	146.5	142.294	144.68	165.067	150.099	149.521	145.037	145.359	4.43022	836
ENSMUSG00000020766	Galk1	galactokinase 1		Unclassified				121.502	133.199	135.056	131.784	180.576	157.381	155.929	144.889	145.039	6.68599	837
ENSMUSG00000021242	Npc2	NPC intracellular cholesterol transporter 2						153.928	151.589	145.244	141.067	149.889	141.207	139.448	137.317	144.961	2.18258	838
ENSMUSG00000032575	Manf	mesencephalic astrocyte-derived neurotrophic factor						127.335	144.528	148.759	145.344	141.106	155.409	143.16	153.313	144.869	3.05419	839
ENSMUSG00000024829	Mrpl21	mitochondrial ribosomal protein L21						142.129	138.667	136.692	133.362	148.184	157.538	147.031	155.341	144.868	3.0795	840
ENSMUSG00000021243	Fcf1	FCF1 rRNA processing protein						134.99	140.239	139.242	131.083	155.041	150.947	141.225	163.98	144.593	3.91668	841
ENSMUSG00000049422	Chchd10	coiled-coil-helix-coiled-coil-helix domain containing 10						133.505	137.571	158.823	138.013	161.533	143.731	139.414	143.692	144.535	3.61877	842
ENSMUSG00000050565	Tor1aip2	torsin A interacting protein 2						127.207	140.397	144.658	146.82	139.557	148.159	156.041	152.657	144.437	3.15888	843
ENSMUSG00000035775	Krt20	keratin 20						130.046	144.726	139.552	140.352	145.892	155.444	148.583	150.187	144.348	2.74247	844
ENSMUSG00000063358	Mapk1	mitogen-activated protein kinase 1		Mitogen-activated protein kinases				121.069	135.958	143.848	145.084	153.373	142.969	151.161	161.115	144.322	4.27614	845
ENSMUSG00000014769	Psmb1	proteasome (prosome, macropain) subunit, beta type 1						140.979	137.752	142.87	135.347	152.604	151.511	144.09	149.384	144.317	2.24778	846
ENSMUSG00000079426	Arpc4	actin related protein 2/3 complex, subunit 4						133.908	142.238	140.551	136.319	144.385	154.401	148.852	151.364	144.002	2.5423	847
ENSMUSG00000029752	Asns	asparagine synthetase						119.41	129.172	131.385	137.183	160.411	149.526	163.549	159.08	143.715	5.88419	848
ENSMUSG00000038374	Rbm8a	RNA binding motif protein 8a						122.303	139.977	157.609	150.231	162.283	137.779	132.157	146.913	143.656	4.68992	849
ENSMUSG00000058558	Rpl5	ribosomal protein L5						135.012	148.426	140.22	147.918	135.255	141.107	149.378	151.122	143.555	2.28707	850
ENSMUSG00000071653	1810009A15Rik	RIKEN cDNA 1810009A15 gene						142.596	148.365	132.449	135.731	149.479	153.671	139.869	145.805	143.496	2.55186	851
ENSMUSG00000029177	Cenpa	centromere protein A						139.172	140.944	147.07	150.706	156.295	143.574	131.261	138.73	143.469	2.75874	852
ENSMUSG00000019428	Fkbp8	FK506 binding protein 8						121.958	137.334	146.586	151.756	175.434	141.738	138.132	132.8	143.217	5.58264	853
ENSMUSG00000020914	Top2a	topoisomerase (DNA) II alpha						126.513	135.444	144.278	156.418	152.535	138.117	139.403	151.713	143.053	3.57113	854
ENSMUSG00000035828	Pim3	proviral integration site 3		Unclassified				118.681	126.822	155.896	143.095	187.111	140.696	143.293	128.179	142.971	7.54782	855
ENSMUSG00000024576	Csnk1a1	casein kinase 1, alpha 1		Unclassified				124.168	133.169	146.298	149.621	140.743	137.95	155.82	155.637	142.926	3.92021	856
ENSMUSG00000028249	Sdcbp	syndecan binding protein						123.557	136.867	140.056	137.319	148.285	144.888	151.337	159.422	142.716	3.84196	857
ENSMUSG00000031813	Mvb12a	multivesicular body subunit 12A						127.322	139.704	141.156	134.576	171.782	139.421	147.431	139.595	142.623	4.63363	858
ENSMUSG00000021957	Tkt	transketolase						127.006	142.744	144.073	145.192	156.47	140.114	147.79	136.352	142.468	3.03697	859
ENSMUSG00000066878	Gm10184	predicted pseudogene 10184						116.259	131.779	135.127	140.35	149.878	152.099	153.601	158.683	142.222	4.98854	860
ENSMUSG00000029777	Gars	glycyl-tRNA synthetase						117.171	133.894	135.102	144.364	146.505	144.47	154.963	159.129	141.95	4.67347	861
ENSMUSG00000033047	Eif3l	eukaryotic translation initiation factor 3, subunit L						130.449	136.944	137.15	144.587	149.825	148.275	141.268	146.285	141.848	2.34717	862
ENSMUSG00000003269	Cyth2	cytohesin 2						116.691	132.614	130.161	141.118	166.848	150.022	150.843	145.007	141.663	5.40781	863
ENSMUSG00000038812	Trmt112	tRNA methyltransferase 11-2						137.487	147.83	134.392	138.922	145.275	146.242	140.283	142.517	141.619	1.65015	864
ENSMUSG00000053931	Cnn3	calponin 3, acidic						114.138	135.853	132.402	141.015	149.378	149.399	149.567	159.445	141.4	4.95528	865
ENSMUSG00000056629	Fkbp2	FK506 binding protein 2						132.184	133.368	137.01	148.227	161.204	140.003	144.805	133.617	141.302	3.48866	866
ENSMUSG00000058927	Gm10053	predicted gene 10053						147.828	131.344	140.079	128.246	123.257	143.775	154.276	160.609	141.177	4.60283	867
ENSMUSG00000030037	Mrpl53	mitochondrial ribosomal protein L53						140.427	144.099	143.723	138.864	148.447	144.046	140.359	127.867	140.979	2.15275	868
ENSMUSG00000058076	Sdhc	succinate dehydrogenase complex, subunit C, integral membrane protein						126.618	126.03	136.178	137.641	159.987	137.482	153.258	146.649	140.48	4.26437	869
ENSMUSG00000021012	Zc3h14	zinc finger CCCH type containing 14						125.396	136.172	147.802	139.011	145.914	139.155	144.818	144.046	140.289	2.55083	870
ENSMUSG00000049327	Kmt5a	lysine methyltransferase 5A						121.027	139.886	141.627	153.865	147.599	138.127	136.433	141.644	140.026	3.35824	871
ENSMUSG00000036835	Psenen	presenilin enhancer gamma secretase subunit						129.874	136.41	134.877	127.582	160.824	143.94	144.707	139.779	139.749	3.70027	872
ENSMUSG00000008601	Rab25	RAB25, member RAS oncogene family						122.876	145.606	127.202	135.533	170.575	144.514	131.086	138.563	139.494	5.24926	873
ENSMUSG00000071497	Nutf2-ps1	nuclear transport factor 2, pseudogene 1						122.963	133.63	136.605	139.67	148.214	141.587	139.613	153.175	139.432	3.22821	874
ENSMUSG00000051154	Commd3	COMM domain containing 3						122.262	128.53	136.616	139.256	146.506	154.535	141.44	146.098	139.405	3.65527	875
ENSMUSG00000005447	Pafah1b3	platelet-activating factor acetylhydrolase, isoform 1b, subunit 3						128.588	132.428	134.869	123.443	163.066	147.106	143.333	141.828	139.333	4.39448	876
ENSMUSG00000007415	Gatad1	GATA zinc finger domain containing 1	zf-GATA					137.569	144.255	135.927	141.453	125.924	144.152	145.605	139.067	139.244	2.25914	877
ENSMUSG00000062963	Ufc1	ubiquitin-fold modifier conjugating enzyme 1						140.89	128.482	146.099	128.824	142.848	138.37	141.971	144.835	139.04	2.41358	878
ENSMUSG00000075602	Ly6a	lymphocyte antigen 6 complex, locus A						143.477	125.437	129.755	133.41	114.414	164.878	148.547	151.878	138.974	5.75054	879
ENSMUSG00000024067	Dpy30	dpy-30, histone methyltransferase complex regulatory subunit						138.892	131.031	138.569	132.591	128.113	143.673	147.657	149.137	138.708	2.74567	880
ENSMUSG00000001864	Aif1l	allograft inflammatory factor 1-like						116.822	131.278	132.61	129.017	168.664	149.98	134.882	144.466	138.465	5.56941	881
ENSMUSG00000026479	Lamc2	laminin, gamma 2						118.868	148.912	143.48	157.915	145.085	123.966	146.062	122.905	138.399	5.08931	882
ENSMUSG00000004667	Polr2e	polymerase (RNA) II (DNA directed) polypeptide E						119.291	133.278	131.223	131.797	165.117	148.764	139.475	137.543	138.311	4.83579	883
ENSMUSG00000027680	Fxr1	fragile X mental retardation gene 1, autosomal homolog						117.579	127.97	132.438	133.07	137.545	139.307	154.984	160.083	137.872	4.91129	884
ENSMUSG00000008690	Ncaph2	non-SMC condensin II complex, subunit H2						123.403	131.517	132.608	141.559	159.484	138.348	140.602	134.324	137.731	3.72793	885
ENSMUSG00000043091	Tuba1c	tubulin, alpha 1C						121.9	137.995	140.497	148.115	142.49	138.628	134.868	137.081	137.697	2.6667	886
ENSMUSG00000005566	Trim28	tripartite motif-containing 28						108.717	128.542	143.774	145.058	168.366	129.005	130.118	145.778	137.42	6.20058	887
ENSMUSG00000031422	Morf4l2	mortality factor 4 like 2						120.359	123.375	126.714	138.763	141.059	140.734	151.191	157.11	137.413	4.64133	888
ENSMUSG00000021076	Actr10	ARP10 actin-related protein 10						116.194	118.87	137.159	122.612	164.84	154.368	140.581	144.673	137.412	6.14654	889
ENSMUSG00000063011	Msln	mesothelin						102.042	128.823	129.424	131.93	161.327	153.761	137.362	152.8	137.184	6.67393	890
ENSMUSG00000065546	Mir196a-1	microRNA 196a-1						80.2969	209.456	165.409	149.354	115.367	78.8227	150.489	147.819	137.127	15.5702	891
ENSMUSG00000015143	Actn1	actinin, alpha 1						120.282	132.674	146.803	152.626	139.003	134.067	135.331	136.214	137.125	3.41835	892
ENSMUSG00000018287	Spag7	sperm associated antigen 7						136.461	120.746	126.95	119.685	154.261	143.109	144.934	149.742	136.986	4.6787	893
ENSMUSG00000091625	Lsm5	LSM5 homolog, U6 small nuclear RNA and mRNA degradation associated						156.235	137.234	141.68	122.268	101.248	162.704	133.024	141.259	136.956	6.78995	894
ENSMUSG00000041560	Nop53	NOP53 ribosome biogenesis factor						120.68	149.543	136.588	140.689	163.68	140.478	123.164	120.342	136.896	5.39541	895
ENSMUSG00000025410	Dctn2	dynactin 2						117.06	131.128	127.76	140.044	156.913	140.735	142.587	138.811	136.88	4.16532	896
ENSMUSG00000056671	Prelid2	PRELI domain containing 2						134.78	133.561	128.237	117.897	122.03	155.307	156.838	144.446	136.637	5.11589	897
ENSMUSG00000037935	Smarce1	SWI/SNF related, matrix associated, actin dependent regulator of chromatin, subfamily e, member 1	HMG					104.838	131.505	141.671	137.743	158.688	136.428	141.585	139.869	136.541	5.32048	898
ENSMUSG00000020485	Supt4a	suppressor of Ty 4A						134.776	126.677	132.615	124.193	141.707	147.584	144.943	138.139	136.329	2.95723	899
ENSMUSG00000001507	Itga3	integrin alpha 3						121.934	135.132	145.36	161.017	136.003	122.508	130.209	136.466	136.079	4.48765	900
ENSMUSG00000063696	Gm8730	predicted pseudogene 8730						129.683	152.888	156.056	137.297	175.891	115.133	104.118	116.891	135.995	8.59542	901
ENSMUSG00000028034	Fubp1	far upstream element (FUSE) binding protein 1						118.59	123.762	145.31	143.304	141.24	129.271	139.375	145.593	135.806	3.70511	902
ENSMUSG00000034341	Wbp2	WW domain binding protein 2						114.701	126.563	136.553	143.065	150.095	134.294	139.603	141.57	135.805	3.86886	903
ENSMUSG00000031586	Rbpms	RNA binding protein gene with multiple splicing						129.074	126.028	134.731	138.674	149.456	133.289	139.806	135.205	135.783	2.53309	904
ENSMUSG00000062270	Morf4l1	mortality factor 4 like 1						126.255	128.042	127.663	127.691	129.346	146.028	146.234	153.53	135.599	3.90143	905
ENSMUSG00000028618	Tmem59	transmembrane protein 59						109.308	122.404	129.333	134.97	146.733	152.409	152.664	136.524	135.543	5.35125	906
ENSMUSG00000000326	Comt	catechol-O-methyltransferase						110.467	122.023	128.611	141.659	156.083	135.181	150.008	140.288	135.54	5.26252	907
ENSMUSG00000022193	Psmb5	proteasome (prosome, macropain) subunit, beta type 5						110.277	127.565	134.853	133.127	162.523	138.734	141.663	134.524	135.408	5.14912	908
ENSMUSG00000024217	Snrpc	U1 small nuclear ribonucleoprotein C						125.961	122.066	124.987	127.558	153.52	145.369	138.752	142.695	135.113	4.07147	909
ENSMUSG00000015733	Capza2	capping protein (actin filament) muscle Z-line, alpha 2						117.7	124.985	135.973	126.747	125.231	143.927	151.794	151.943	134.787	4.65318	910
ENSMUSG00000091896	Ube2d2a	ubiquitin-conjugating enzyme E2D 2A						113.94	120.494	129.286	135.014	120.899	146.512	158.447	152.897	134.686	5.80521	911
ENSMUSG00000015575	Atp6v0e	ATPase, H+ transporting, lysosomal V0 subunit E						132.69	126.102	138.841	120.665	139.054	144.23	137.328	136.755	134.458	2.71419	912
ENSMUSG00000016541	Atxn10	ataxin 10						117.015	126.515	129.023	129.919	142.659	140.12	142.632	147.736	134.452	3.68374	913
ENSMUSG00000027715	Ccna2	cyclin A2						117.318	122.594	139.121	139.089	146.945	131.742	135.518	140.711	134.13	3.48571	914
ENSMUSG00000025858	Get4	golgi to ER traffic protein 4						119.561	128.081	132.388	133.458	157.032	140.071	134.421	125.624	133.829	3.97273	915
ENSMUSG00000032966	Fkbp1a	FK506 binding protein 1a						125.911	132.889	119.813	118.762	130.531	144.14	150.285	146.517	133.606	4.30034	916
ENSMUSG00000025203	Scd2	stearoyl-Coenzyme A desaturase 2						119.389	127.529	145.614	150.212	111.99	129.012	144.225	140.213	133.523	4.82504	917
ENSMUSG00000060152	Pop5	processing of precursor 5, ribonuclease P/MRP family (S. cerevisiae)						123.273	124.047	125.946	125.746	149.084	136.772	138.855	141.174	133.112	3.40966	918
ENSMUSG00000093989	Rnasek	ribonuclease, RNase K						123.458	131.228	134.207	126.666	133.618	144.602	139.291	131.525	133.074	2.36216	919
ENSMUSG00000020708	Psmc5	protease (prosome, macropain) 26S subunit, ATPase 5						114.729	126.565	136.122	133.932	145.285	133.386	143.974	129.923	132.99	3.4508	920
ENSMUSG00000021576	Pdcd6	programmed cell death 6						125.841	123.496	132.206	120.703	142.623	136.902	135.402	145.939	132.889	3.20256	921
ENSMUSG00000028416	Bag1	BCL2-associated athanogene 1						135.115	131.861	137.958	122.502	128.157	137.131	141.83	128.181	132.842	2.24431	922
ENSMUSG00000042520	Ubap2l	ubiquitin-associated protein 2-like						121.159	124.144	139.473	146.703	134.01	119.74	144.22	132.997	132.806	3.66137	923
ENSMUSG00000036748	Cuedc2	CUE domain containing 2						127.368	119.653	130.099	139.942	158.691	138.107	128.541	119.221	132.703	4.55451	924
ENSMUSG00000019923	Zwint	ZW10 interactor						116.214	126.525	132.882	129.838	130.763	140.594	138.625	146.106	132.693	3.27064	925
ENSMUSG00000002580	Mien1	migration and invasion enhancer 1						131.363	124.358	124.174	115.753	137.229	145.38	138.963	144.14	132.67	3.73848	926
ENSMUSG00000038508	Gdf15	growth differentiation factor 15						101.079	126.241	123.593	148.108	179.285	115.885	135.721	131.408	132.665	8.26539	927
ENSMUSG00000034211	Mrps17	mitochondrial ribosomal protein S17						116.669	129.11	129.012	133.126	137.013	140.938	136.584	138.042	132.562	2.71763	928
ENSMUSG00000028138	Adh5	alcohol dehydrogenase 5 (class III), chi polypeptide						111.05	121.857	128.498	122.121	145.152	137.41	144.247	149.752	132.511	4.8494	929
ENSMUSG00000025066	Sfr1	SWI5 dependent recombination repair 1						114.377	121.962	126.559	129.709	137.536	140.654	139.706	146.709	132.151	3.84356	930
ENSMUSG00000017716	Birc5	baculoviral IAP repeat-containing 5						124.083	127.256	133.646	129.42	136.087	136.256	133.139	136.035	131.99	1.61997	931
ENSMUSG00000019471	Cdc37	cell division cycle 37						111.918	131.58	127.076	130.075	159.531	129.617	135.097	130.713	131.951	4.64117	932
ENSMUSG00000034681	Rnps1	ribonucleic acid binding protein S1						108.715	116.516	133.132	132.185	150.892	135.102	140.71	137.521	131.846	4.73582	933
ENSMUSG00000002416	Ndufb2	NADH:ubiquinone oxidoreductase subunit B2						115.099	125.073	142.613	129.936	134.339	148.188	136.217	122.343	131.726	3.84631	934
ENSMUSG00000008475	Arpc5	actin related protein 2/3 complex, subunit 5						121.011	125.446	131.906	121.321	127.357	138.403	145.37	142.979	131.724	3.37798	935
ENSMUSG00000062580	Timm17a	translocase of inner mitochondrial membrane 17a						113.483	124.871	136.508	117.532	150.912	140.7	137.933	131.828	131.721	4.4145	936
ENSMUSG00000031948	Kars	lysyl-tRNA synthetase						118.671	131.005	129.899	131.96	142.317	134.536	131.99	133.083	131.683	2.3003	937
ENSMUSG00000021832	Psmc6	proteasome (prosome, macropain) 26S subunit, ATPase, 6						119.411	111.705	126.93	116.543	137.892	142.255	148.501	149.855	131.637	5.28622	938
ENSMUSG00000025027	Xpnpep1	X-prolyl aminopeptidase (aminopeptidase P) 1, soluble						115.887	122.52	119.941	130.72	146.368	137.058	144.468	135.982	131.618	4.00605	939
ENSMUSG00000075700	Selenot	selenoprotein T						115.076	119.532	134.39	126.126	122.272	134.453	144.093	156.669	131.576	4.88458	940
ENSMUSG00000039831	Arhgap29	Rho GTPase activating protein 29						118.351	123.073	136.887	132.577	126.075	124.056	143.796	147.213	131.503	3.6767	941
ENSMUSG00000079225	Gm9531	predicted gene 9531						129.831	117.759	116.128	119.136	103.34	152.742	154.492	157.915	131.418	7.3816	942
ENSMUSG00000001472	Tcf25	transcription factor 25 (basic helix-loop-helix)						115.426	129.499	134.341	135.029	143.037	126.572	135.856	129.135	131.112	2.8774	943
ENSMUSG00000055065	Ddx17	DEAD (Asp-Glu-Ala-Asp) box polypeptide 17						110.324	130.902	132.568	146.46	129.735	122.111	135.403	140.398	130.988	3.91267	944
ENSMUSG00000030304	Ergic2	ERGIC and golgi 2						120.912	121.878	130.288	126.237	132.718	138.347	143.95	132.333	130.833	2.78502	945
ENSMUSG00000035086	Becn1	beclin 1, autophagy related						112.306	129.548	133.197	145.797	152.554	133.726	117.211	122.085	130.803	4.84896	946
ENSMUSG00000059208	Hnrnpm	heterogeneous nuclear ribonucleoprotein M						114.847	121.77	130.274	140.418	118.497	137.241	132.005	150.389	130.68	4.24004	947
ENSMUSG00000026202	Tuba4a	tubulin, alpha 4A						121.307	127.539	128.601	135.319	134.437	130.677	135.507	131.124	130.564	1.6959	948
ENSMUSG00000028609	Magoh	mago homolog, exon junction complex core component						122.616	126.48	123.77	114.081	123.545	139.263	141.569	153.162	130.561	4.54026	949
ENSMUSG00000052837	Junb	jun B proto-oncogene	TF_bZIP					109.074	128.13	121.183	148.023	162.751	119.325	132.976	122.861	130.54	6.1063	950
ENSMUSG00000071172	Srsf3	serine/arginine-rich splicing factor 3						117.413	128.17	122.753	128.274	144.672	138.232	130.341	134.127	130.498	3.03397	951
ENSMUSG00000024725	Ostf1	osteoclast stimulating factor 1						120.052	122.216	126.845	122.16	136.766	138.951	137.352	138.025	130.296	2.9113	952
ENSMUSG00000005510	Ndufs3	NADH:ubiquinone oxidoreductase core subunit S3						116.926	124.141	128.947	118.687	139.554	133.065	140.33	140.561	130.276	3.41385	953
ENSMUSG00000037916	Ndufv1	NADH:ubiquinone oxidoreductase core subunit V1						110.732	121.988	115.276	130.612	152.882	132.827	144.852	131.176	130.043	5.011	954
ENSMUSG00000085787	Gm13092	predicted gene 13092						109.268	122.263	123.447	136.078	170.766	122.95	130.674	124.425	129.984	6.42638	955
ENSMUSG00000022255	Mtdh	metadherin						117.867	127.167	132.271	135.674	125.023	122.527	143.694	135.588	129.976	2.9639	956
ENSMUSG00000029106	Add1	adducin 1 (alpha)						110.751	129.742	130.23	147.92	143.492	119.451	131.984	126.134	129.963	4.2341	957
ENSMUSG00000062248	Cks2	CDC28 protein kinase regulatory subunit 2		Unclassified				127.704	124.5	126.145	126.304	118.742	148.641	138.244	129.099	129.922	3.29229	958
ENSMUSG00000029422	Rsrc2	arginine/serine-rich coiled-coil 2						115.216	118.9	125.991	122.422	131.316	134.152	140.309	148.822	129.641	3.99496	959
ENSMUSG00000029131	Dnajb6	DnaJ heat shock protein family (Hsp40) member B6						114.983	124.512	130.689	123.469	132.659	130.637	138.164	142.012	129.641	3.03595	960
ENSMUSG00000024338	Psmb8	proteasome (prosome, macropain) subunit, beta type 8 (large multifunctional peptidase 7)						122.785	119.659	124.494	124.823	139.482	134.983	137.319	130.46	129.251	2.60534	961
ENSMUSG00000004642	Slbp	stem-loop binding protein						114.657	120.944	128.649	128.618	129.423	131.098	134.479	145.178	129.131	3.18216	962
ENSMUSG00000027752	Exosc8	exosome component 8						109.829	125.831	129.61	114.257	153.369	131.332	129.673	139.001	129.113	4.80873	963
ENSMUSG00000030879	Mrpl17	mitochondrial ribosomal protein L17						118.625	126.24	124.651	120.098	143.587	131.618	140.886	126.8	129.063	3.21584	964
ENSMUSG00000005683	Cs	citrate synthase						112.155	127.142	130.074	135.836	134.156	127.633	131.156	132.949	128.887	2.61759	965
ENSMUSG00000054405	Dnajc8	DnaJ heat shock protein family (Hsp40) member C8						100.449	121.919	118.389	118.594	141.159	139.82	144.711	142.948	128.499	5.65447	966
ENSMUSG00000031950	Gabarapl2	gamma-aminobutyric acid (GABA) A receptor-associated protein-like 2						120.201	118.101	120.943	108.803	132.857	142.484	148.941	133.085	128.177	4.77093	967
ENSMUSG00000019818	Cd164	CD164 antigen						111.751	117.6	131.954	135.166	126.935	121.669	135.569	144.596	128.155	3.81002	968
ENSMUSG00000031059	Ndufb11	NADH:ubiquinone oxidoreductase subunit B11						130.503	124.24	132.07	124.203	140.471	128.051	116.691	126.015	127.781	2.45809	969
ENSMUSG00000071650	Ganab	alpha glucosidase 2 alpha neutral subunit						113.185	118.702	132.242	149.277	133.857	117.25	128.36	129.254	127.766	4.07032	970
ENSMUSG00000095677	Dynlt1f	dynein light chain Tctex-type 1F						127.059	128.157	130.123	126.875	130.704	117.172	135.458	126.041	127.699	1.84188	971
ENSMUSG00000037236	Matr3	matrin 3						115.917	118.738	126.553	124.209	110.419	129.679	141.107	154.621	127.655	5.07028	972
ENSMUSG00000002768	Mea1	male enhanced antigen 1						116.531	128.162	122.563	121.999	141.516	131.591	130.389	126.795	127.443	2.66389	973
ENSMUSG00000003873	Bax	BCL2-associated X protein						116.997	118.49	120.908	129.154	146.216	132.727	128.469	126.433	127.424	3.3202	974
ENSMUSG00000000001	Gnai3	guanine nucleotide binding protein (G protein), alpha inhibiting 3						109.136	119.582	125.22	122.686	116.233	132.783	147.661	145.207	127.314	4.82342	975
ENSMUSG00000026421	Csrp1	cysteine and glycine-rich protein 1						114.087	115.159	116.008	126.785	150.315	131.386	135.077	129.486	127.288	4.3536	976
ENSMUSG00000037706	Cd81	CD81 antigen						109.723	126.921	120.788	145.08	146.517	125.517	120.034	119.95	126.816	4.52193	977
ENSMUSG00000026755	Arpc5l	actin related protein 2/3 complex, subunit 5-like						118.095	121.994	127.293	120.975	126.737	129.423	138.993	130.55	126.757	2.32478	978
ENSMUSG00000029705	Cux1	cut-like homeobox 1	CUT					110.542	121.962	124.972	126.805	137.867	130.095	130.691	128.281	126.402	2.80461	979
ENSMUSG00000024425	Ndfip1	Nedd4 family interacting protein 1						105.802	115.979	117.291	117.319	125.059	137.569	148.415	142.813	126.281	5.30965	980
ENSMUSG00000028063	Lmna	lamin A						107.399	128.481	123.435	142.742	133.213	129.104	121.32	124.005	126.212	3.60111	981
ENSMUSG00000018906	P4ha2	procollagen-proline, 2-oxoglutarate 4-dioxygenase (proline 4-hydroxylase), alpha II polypeptide						109.722	111.797	118.546	131.295	168.992	113.349	141.914	113.676	126.161	7.27467	982
ENSMUSG00000006057	Atp5g1	ATP synthase, H+ transporting, mitochondrial F0 complex, subunit C1 (subunit 9)						135.074	120.477	138.887	120.794	122.962	132.598	121.24	117.08	126.139	2.86873	983
ENSMUSG00000062929	Cfl2	cofilin 2, muscle						121.296	119.558	121.623	112.65	114.999	143.861	136.041	138.144	126.022	4.11738	984
ENSMUSG00000001056	Nhp2	NHP2 ribonucleoprotein						117.66	120.094	123.014	124.949	140.269	127.812	131.581	122.108	125.936	2.5621	985
ENSMUSG00000018677	Slc25a39	solute carrier family 25, member 39			Solute carriers			117.696	124.757	125.017	130.761	138.712	128.233	126.063	115.937	125.897	2.54218	986
ENSMUSG00000015749	Anp32e	acidic (leucine-rich) nuclear phosphoprotein 32 family, member E						107.597	120.62	127.249	134.647	124.349	121.42	134.065	136.845	125.849	3.40722	987
ENSMUSG00000040447	Spns2	spinster homolog 2			Solute carriers			116.662	113.109	126.081	136.698	145.26	120.29	128.167	120.441	125.838	3.79561	988
ENSMUSG00000053119	Chmp3	charged multivesicular body protein 3						114.34	128.299	122.143	121.548	130.507	123.293	136.105	127.454	125.461	2.33565	989
ENSMUSG00000026356	Dars	aspartyl-tRNA synthetase						103.277	112.061	115.031	113.517	130.276	137.072	143.149	149.094	125.435	5.90478	990
ENSMUSG00000000278	Scpep1	serine carboxypeptidase 1						109.286	115.391	121.301	127.733	136.799	128.674	133.632	130.091	125.363	3.30718	991
ENSMUSG00000115987	Vps28	vacuolar protein sorting 28						108.769	115.678	117.259	119.481	148.095	134.928	129.731	128.794	125.342	4.44909	992
ENSMUSG00000032397	Tipin	timeless interacting protein						122.323	110.497	115.065	114.814	120.839	132.377	143.805	139.833	124.944	4.36151	993
ENSMUSG00000023048	Prr13	proline rich 13						117.385	116.544	120.403	125.108	133.436	128.644	126.63	130.204	124.794	2.17322	994
ENSMUSG00000016256	Ctsz	cathepsin Z						101.873	120.499	120.152	133.512	148.086	119.809	129.179	124.779	124.736	4.68271	995
ENSMUSG00000006360	Crip1	cysteine-rich protein 1 (intestinal)						117.239	125.574	119.051	122.741	142.763	129.1	123.542	116.582	124.574	3.00272	996
ENSMUSG00000029169	Dhx15	DEAH (Asp-Glu-Ala-His) box polypeptide 15						110.035	113.661	124.706	125.688	123.215	125.494	132.109	141.595	124.563	3.48697	997
ENSMUSG00000053317	Sec61b	Sec61 beta subunit						119.582	125.423	137.867	114.179	125.047	124.06	127.71	121.609	124.435	2.4251	998
ENSMUSG00000024911	Fibp	fibroblast growth factor (acidic) intracellular binding protein						110.352	116.055	128.659	120.147	137.878	135.118	127.497	118.458	124.27	3.39253	999
ENSMUSG00000030103	Bhlhe40	basic helix-loop-helix family, member e40	bHLH					101.486	112.905	120.259	129.507	149.648	116.783	140.402	123.147	124.267	5.43367	1000
ENSMUSG00000022370	Mrpl13	mitochondrial ribosomal protein L13						120.209	117.78	122.839	109.984	123.68	135.718	123.774	136.093	123.76	3.08822	1001
ENSMUSG00000073639	Rab18	RAB18, member RAS oncogene family						105.423	111.213	116.048	123.926	123.053	125.381	147.827	136.886	123.72	4.83259	1002
ENSMUSG00000022505	Emp2	epithelial membrane protein 2						107.271	117.321	116.612	128.62	124.444	125.358	135.534	133.498	123.582	3.33882	1003
ENSMUSG00000031538	Plat	plasminogen activator, tissue						121.514	118.216	122.631	128.519	126.561	127.055	120.307	123.316	123.515	1.26809	1004
ENSMUSG00000041859	Mcm3	minichromosome maintenance complex component 3						101.691	110.526	119.256	129.097	140.107	125.539	130.201	127.635	123.006	4.29548	1005
ENSMUSG00000090247	Bloc1s1	biogenesis of lysosomal organelles complex-1, subunit 1						122.321	124.304	121.609	120.408	134.819	124.171	117.287	119.031	122.994	1.89107	1006
ENSMUSG00000027852	Nras	neuroblastoma ras oncogene						107.621	113.102	131.912	124.176	123.014	122.39	136.241	122.506	122.62	3.24606	1007
ENSMUSG00000035297	Cops4	COP9 signalosome subunit 4						108.145	116.942	111.116	110.23	130.352	135.607	134.318	133.196	122.488	4.23544	1008
ENSMUSG00000022673	Mcm4	minichromosome maintenance complex component 4						100.118	113.71	123.201	125.036	121.965	122.461	136.319	135.883	122.336	4.13023	1009
ENSMUSG00000078941	Ak6	adenylate kinase 6		Adenylate kinases				107.96	112.293	118.561	112.709	126.462	129.859	132.613	137.273	122.216	3.81891	1010
ENSMUSG00000020571	Pdia6	protein disulfide isomerase associated 6						107.144	117.163	123.749	136.623	129.657	117.675	118.301	126.776	122.136	3.20334	1011
ENSMUSG00000078923	Ube2v1	ubiquitin-conjugating enzyme E2 variant 1						115.13	113.544	112.077	117.725	124.8	132.041	128.931	130.308	121.82	2.86889	1012
ENSMUSG00000096255	Dynlt1b	dynein light chain Tctex-type 1B						123.399	116.932	136.43	120.857	124.067	110.555	114.363	127.148	121.719	2.85548	1013
ENSMUSG00000019487	Trip10	thyroid hormone receptor interactor 10						112.529	108.776	119.896	127.251	138.966	120.959	129.284	115.689	121.669	3.47836	1014
ENSMUSG00000031622	Sin3b	transcriptional regulator, SIN3B (yeast)						100.519	117.421	117.015	114.178	136.137	130.917	129.111	125.389	121.336	4.023	1015
ENSMUSG00000005687	Bcas2	breast carcinoma amplified sequence 2						111.971	110.665	121.833	112.568	128.333	127.779	132.428	124.925	121.313	3.00316	1016
ENSMUSG00000029616	Erp29	endoplasmic reticulum protein 29						119.855	114.475	116.315	122.578	133.475	118.64	123.907	121.16	121.3	2.05842	1017
ENSMUSG00000063412	Gm10131	predicted pseudogene 10131						137.211	121.096	120.213	105.359	98.9347	135.868	116.586	134.046	121.164	5.00973	1018
ENSMUSG00000022800	Fyttd1	forty-two-three domain containing 1						97.6924	115.642	108.331	114.379	120.263	130.619	141.554	137.591	120.759	5.28918	1019
ENSMUSG00000021377	Dek	DEK oncogene (DNA binding)						105.472	123.515	115.953	127.738	114.349	115.745	125.826	135.189	120.473	3.30731	1020
ENSMUSG00000025403	Shmt2	serine hydroxymethyltransferase 2 (mitochondrial)						90.7428	114.567	116.429	133.713	140.359	117.6	126.995	122.691	120.387	5.28056	1021
ENSMUSG00000029767	Calu	calumenin						100.351	113.494	120.105	134.642	116.357	116.537	128.479	132.468	120.304	3.99709	1022
ENSMUSG00000027206	Cops2	COP9 signalosome subunit 2						99.0305	105.909	108.503	118.982	124.197	143.146	135.868	123.325	119.87	5.32438	1023
ENSMUSG00000014301	Pam16	presequence translocase-asssociated motor 16 homolog (S. cerevisiae)						124.553	121.25	124.758	126.486	135.024	124.369	110.044	92.1341	119.827	4.643	1024
ENSMUSG00000021111	Papola	poly (A) polymerase alpha						115.512	114.278	131.302	124.649	101.301	119.602	113.984	137.334	119.745	3.98257	1025
ENSMUSG00000024283	Wac	WW domain containing adaptor with coiled-coil						103.332	115.223	116.93	128.453	125.198	113.102	135.12	120.331	119.711	3.49532	1026
ENSMUSG00000020307	Cdc34	cell division cycle 34						113.964	125.525	117.32	122.757	126.044	119.032	126.85	103.966	119.432	2.74071	1027
ENSMUSG00000055850	Rnf181	ring finger protein 181						100.326	108.765	115.667	116.735	135.493	124.346	123.978	129.78	119.386	4.0313	1028
ENSMUSG00000044573	Acp1	acid phosphatase 1, soluble						109.525	110.079	116.534	108.624	126.778	120.842	127.465	132.207	119.007	3.25437	1029
ENSMUSG00000044080	S100a1	S100 calcium binding protein A1						124.067	108.779	124.389	108.553	120.542	121.948	124.934	117.318	118.816	2.3798	1030
ENSMUSG00000051391	Ywhag	tyrosine 3-monooxygenase/tryptophan 5-monooxygenase activation protein, gamma polypeptide						106.246	119.8	124.639	130.797	113.584	113.253	122.455	118.565	118.667	2.69878	1031
ENSMUSG00000029621	Arpc1a	actin related protein 2/3 complex, subunit 1A						117.871	121.796	120.898	120.942	116.079	120.413	116.829	114.375	118.65	0.964714	1032
ENSMUSG00000063480	Snu13	SNU13 homolog, small nuclear ribonucleoprotein (U4/U6.U5)						112.452	111.322	116.471	118.177	116.283	121.506	120.294	132.363	118.609	2.32056	1033
ENSMUSG00000037313	Tacc3	transforming, acidic coiled-coil containing protein 3						98.939	111.544	108.127	120.588	127.846	133.79	118.843	128.925	118.575	4.16804	1034
ENSMUSG00000041740	Rnf10	ring finger protein 10						114.382	125.115	118.437	122.91	114.898	116.315	113.156	122.659	118.484	1.60231	1035
ENSMUSG00000020496	Rnf187	ring finger protein 187						100.371	113.537	116.584	122.124	136.107	117.66	125.613	115.788	118.473	3.63199	1036
ENSMUSG00000021537	Cetn3	centrin 3						103.057	103.277	116.003	110.007	111.124	137.638	123.148	143.075	118.416	5.33641	1037
ENSMUSG00000074506	Gm10705	predicted gene 10705						132.96	121.997	124.233	89.442	95.8472	138.211	125.39	117.116	118.149	6.04837	1038
ENSMUSG00000025134	Alyref	Aly/REF export factor						98.6843	112.827	121.454	118.521	134.218	118.232	121.94	119.257	118.142	3.51549	1039
ENSMUSG00000083364	Llph-ps2	LLP homolog, pseudogene 2						104.441	116.829	105.757	103.626	123.7	132.896	138.188	119.038	118.059	4.63821	1040
ENSMUSG00000027893	Ahcyl1	S-adenosylhomocysteine hydrolase-like 1						103.554	105.42	119.655	124.007	121.888	112.092	130.437	127.158	118.026	3.52121	1041
ENSMUSG00000052033	Pfdn4	prefoldin 4						125.946	116.855	105.888	103.135	101.882	133.114	122.572	134.662	118.007	4.66537	1042
ENSMUSG00000024940	Ltbp3	latent transforming growth factor beta binding protein 3						95.536	113.021	122.081	142.069	131.047	101.284	130.953	106.791	117.848	5.77595	1043
ENSMUSG00000033813	Tcea1	transcription elongation factor A (SII) 1						100.981	107.581	112.935	110.954	112.168	125.11	132.158	140.896	117.848	4.78564	1044
ENSMUSG00000026879	Gsn	gelsolin						102.53	109.793	115.844	121.901	135.118	119.061	121.063	115.14	117.556	3.37186	1045
ENSMUSG00000025580	Eif4a3	eukaryotic translation initiation factor 4A3						93.8557	110.547	115.661	113.023	138.589	120.653	127.132	120.651	117.514	4.60629	1046
ENSMUSG00000002395	Use1	unconventional SNARE in the ER 1 homolog (S. cerevisiae)						125.071	127.045	115.151	113.496	122.036	120.143	116.734	99.5216	117.4	3.05099	1047
ENSMUSG00000001440	Kpnb1	karyopherin (importin) beta 1						108.75	110.165	117.742	127.416	115.697	112.909	123.97	122.167	117.352	2.37744	1048
ENSMUSG00000030647	Ndufc2	NADH:ubiquinone oxidoreductase subunit C2						117.679	121.88	113.262	111.535	113.941	127.649	114.153	118.593	117.336	1.89263	1049
ENSMUSG00000066026	Dhrs3	dehydrogenase/reductase (SDR family) member 3						108.257	103.852	124.846	122.034	141.411	105.095	122.026	110.226	117.218	4.52096	1050
ENSMUSG00000019998	Stx7	syntaxin 7						89.4282	116.998	116.659	110.825	126.69	116.908	126.239	133.234	117.123	4.70776	1051
ENSMUSG00000042541	Sem1	SEM1, 26S proteasome complex subunit						125.542	121.734	128.137	112.409	119.989	111.267	106.864	109.021	116.87	2.8302	1052
ENSMUSG00000001017	Chtop	chromatin target of PRMT1						93.4972	110.861	116.633	123.302	128.958	112.946	124.979	121.507	116.585	3.94598	1053
ENSMUSG00000022185	Acin1	apoptotic chromatin condensation inducer 1						102.611	109.344	117.696	128.926	125.646	111.146	118.853	115.479	116.213	3.04191	1054
ENSMUSG00000025364	Pa2g4	proliferation-associated 2G4						96.4269	108.061	112.261	118.102	119.727	120.132	122.817	129.837	115.921	3.61881	1055
ENSMUSG00000029363	Rfc5	replication factor C (activator 1) 5						92.6191	104.706	102.97	114.988	135.59	126.829	126.929	117.544	115.272	5.11237	1056
ENSMUSG00000020439	Smtn	smoothelin						101.103	109.081	109.727	135.078	148.217	103.161	109.347	106.444	115.27	5.98693	1057
ENSMUSG00000028776	Tinagl1	tubulointerstitial nephritis antigen-like 1						96.5873	109.629	113.353	120.581	135.105	110.259	127.004	108.76	115.16	4.24951	1058
ENSMUSG00000026034	Clk1	CDC-like kinase 1		CDC like kinases				87.9139	99.8257	110.648	107.946	120.3	120.744	138.039	135.712	115.141	6.0553	1059
ENSMUSG00000062797	Hikeshi	heat shock protein nuclear import factor						107.008	124.945	109.107	102.395	132.272	122.537	110.924	111.588	115.097	3.63437	1060
ENSMUSG00000003161	Sri	sorcin						103.048	110.228	109.841	97.8694	119.557	126.785	127.813	125.444	115.073	4.05002	1061
ENSMUSG00000030435	U2af2	U2 small nuclear ribonucleoprotein auxiliary factor (U2AF) 2						87.6672	108.539	114.56	125.621	140.732	113.722	116.979	112.007	114.978	5.3091	1062
ENSMUSG00000021807	Rtraf	RNA transcription, translation and transport factor						113.107	111.44	122.384	105.341	111.66	122.062	112.964	118.776	114.717	2.08248	1063
ENSMUSG00000022881	Rfc4	replication factor C (activator 1) 4						102.057	101.794	112.635	103.876	118.988	128.439	125.538	123.348	114.584	3.88934	1064
ENSMUSG00000018858	Mrpl58	mitochondrial ribosomal protein L58						107.445	114.278	114.787	109.712	128.719	121.697	108.886	108.781	114.288	2.64118	1065
ENSMUSG00000026895	Ndufa8	NADH:ubiquinone oxidoreductase subunit A8						105.261	112.404	112.594	101.119	126.498	126.594	119.642	109.788	114.237	3.30245	1066
ENSMUSG00000006494	Pdk1	pyruvate dehydrogenase kinase, isoenzyme 1		Unclassified				110.94	105.823	113.528	110.344	132.208	101.795	122.412	116.77	114.228	3.40255	1067
ENSMUSG00000027787	Nmd3	NMD3 ribosome export adaptor						90.0997	104.305	106.015	110.966	131.147	118.248	128.856	123.179	114.102	4.91919	1068
ENSMUSG00000023020	Cox14	cytochrome c oxidase assembly protein 14						116.591	114.102	116.513	105.955	127.539	112.419	115.382	102.791	113.911	2.64254	1069
ENSMUSG00000032372	Plscr2	phospholipid scramblase 2						98.9921	101.058	110.709	102.448	115.32	125.005	124.035	133.707	113.909	4.52937	1070
ENSMUSG00000039615	Stub1	STIP1 homology and U-Box containing protein 1						96.8322	103.827	107.603	106.529	141.605	118.954	120.413	115.438	113.9	4.86359	1071
ENSMUSG00000022477	Aco2	aconitase 2, mitochondrial						98.5024	105.379	113.97	126.109	136.929	109.754	109.866	110.245	113.844	4.30093	1072
ENSMUSG00000028788	Ptp4a2	protein tyrosine phosphatase 4a2						106.044	106.379	115.761	109.112	96.5323	123.926	123.335	128.205	113.662	3.87302	1073
ENSMUSG00000016534	Lamp2	lysosomal-associated membrane protein 2						98.1927	108.315	112.27	117.32	108.178	115.486	119.423	129.491	113.584	3.27411	1074
ENSMUSG00000046229	Scand1	SCAN domain-containing 1						103.197	121.788	113.093	121.348	133.97	111.945	105.568	97.3362	113.531	4.18805	1075
ENSMUSG00000037361	Sf3b6	splicing factor 3B, subunit 6						109.573	104.296	108.783	111.819	112.897	126.983	116.232	117.374	113.495	2.42688	1076
ENSMUSG00000025503	Taldo1	transaldolase 1						99.5231	107.289	105.201	113.84	129.612	116.864	119.082	116.385	113.474	3.3094	1077
ENSMUSG00000028455	Stoml2	stomatin (Epb7.2)-like 2						92.891	106.04	106.442	108.906	126.905	124.243	131.43	109.404	113.282	4.5987	1078
ENSMUSG00000071014	Ndufb6	NADH:ubiquinone oxidoreductase subunit B6						112.526	112.755	110.067	106.361	109.337	123.062	118.086	113.977	113.271	1.86055	1079
ENSMUSG00000038366	Lasp1	LIM and SH3 protein 1						103.312	110.91	117.54	120.872	117.06	109.561	113.597	113.224	113.26	1.93182	1080
ENSMUSG00000030127	Cops7a	COP9 signalosome subunit 7A						89.9084	102.967	110.801	112.799	134.302	117.153	126.423	111.33	113.211	4.80398	1081
ENSMUSG00000025001	Hells	helicase, lymphoid specific						96.6133	105.021	116.616	113.359	104.593	109.313	121.391	138.477	113.173	4.52947	1082
ENSMUSG00000031996	Aplp2	amyloid beta (A4) precursor-like protein 2						96.1086	111.127	121.23	128.32	117.1	106.5	111.567	113.029	113.123	3.41283	1083
ENSMUSG00000052428	Tmco1	transmembrane and coiled-coil domains 1						94.4266	100.485	110.313	109.969	114.053	118.516	128.094	128.731	113.073	4.27786	1084
ENSMUSG00000022382	Wnt7b	wingless-type MMTV integration site family, member 7B						95.4052	109.607	119.252	135.853	119.197	101.512	114.621	107.703	112.894	4.39846	1085
ENSMUSG00000021037	Ahsa1	AHA1, activator of heat shock protein ATPase 1						87.2269	103.112	110.167	113.024	125.66	118.811	124.145	120.16	112.788	4.51031	1086
ENSMUSG00000024750	Zfand5	zinc finger, AN1-type domain 5						100.213	100.069	108.458	110.615	100.341	120.871	133.331	127.806	112.713	4.65053	1087
ENSMUSG00000047945	Marcksl1	MARCKS-like 1						102.94	105.319	112.695	123.633	109.366	113.289	119.165	114.877	112.66	2.41736	1088
ENSMUSG00000031672	Got2	glutamatic-oxaloacetic transaminase 2, mitochondrial						92.7384	110.551	114.659	120.041	118.96	111.104	117.529	114.804	112.548	3.0767	1089
ENSMUSG00000079614	Seh1l	SEH1-like (S. cerevisiae						98.6522	100.61	114.676	100.857	117.814	119.821	127.681	119.684	112.474	3.86685	1090
ENSMUSG00000025917	Cops5	COP9 signalosome subunit 5						99.8151	107.655	111.325	107.043	119.838	117.925	120.553	115.419	112.447	2.57792	1091
ENSMUSG00000020415	Pttg1	pituitary tumor-transforming gene 1						110.418	104.524	115.696	106.459	111.437	127.193	109.038	114.738	112.438	2.49512	1092
ENSMUSG00000017760	Ctsa	cathepsin A						90.003	103.824	110.439	124.348	134.264	113.268	116.674	106.31	112.391	4.73574	1093
ENSMUSG00000032301	Psma4	proteasome (prosome, macropain) subunit, alpha type 4						90.8472	106.087	106.733	101.816	119.186	118.558	124.811	130.443	112.31	4.65218	1094
ENSMUSG00000020612	Prkar1a	protein kinase, cAMP dependent regulatory, type I, alpha		Unclassified				93.2532	105.155	111.517	117.56	120.989	111.127	119.182	119.054	112.23	3.30563	1095
ENSMUSG00000090258	Churc1	churchill domain containing 1						118.962	110.973	114.538	103.477	112.871	123.288	102.633	108.974	111.965	2.51304	1096
ENSMUSG00000036299	BC031181	cDNA sequence BC031181						95.9586	111.835	108.201	110.477	116.672	116.839	118.093	117.159	111.904	2.61524	1097
ENSMUSG00000091228	Gm20390	predicted gene 20390						80.9924	122.452	108.584	114.097	151.94	113.42	99.4066	103.933	111.853	7.20553	1098
ENSMUSG00000068246	Apol9b	apolipoprotein L 9b						99.4811	121.272	98.7353	116.879	119.044	109.647	122.526	106.896	111.81	3.36517	1099
ENSMUSG00000029203	Ube2k	ubiquitin-conjugating enzyme E2K						100.472	109.942	109.507	109.715	107.186	114.523	119.46	123.422	111.778	2.54892	1100
ENSMUSG00000071533	Pcnp	PEST proteolytic signal containing nuclear protein						103.071	104.571	113.561	107.226	106.102	112.389	123.811	122.945	111.709	2.84635	1101
ENSMUSG00000026558	Uck2	uridine-cytidine kinase 2		Unclassified				96.7795	103.106	107.439	109.051	120.696	114.912	128.339	113.301	111.703	3.51608	1102
ENSMUSG00000041084	Ostc	oligosaccharyltransferase complex subunit (non-catalytic)						102.764	104.667	109.714	103.974	108.96	128.394	111.047	124.052	111.696	3.35984	1103
ENSMUSG00000050914	Ankrd37	ankyrin repeat domain 37						113.008	104.974	113.199	93.4475	123.567	121.638	114.03	109.465	111.666	3.36033	1104
ENSMUSG00000025609	Mkln1	muskelin 1, intracellular mediator containing kelch motifs						93.5953	103.449	109.901	102.371	112.903	118.342	124.344	125.712	111.327	3.97936	1105
ENSMUSG00000026103	Gls	glutaminase						112.008	102.946	101.857	112.59	107.424	100.143	129.858	122.724	111.194	3.72122	1106
ENSMUSG00000029147	Ppm1g	protein phosphatase 1G (formerly 2C), magnesium-dependent, gamma isoform						101.564	110.213	107.115	123.335	108.787	108.377	112.792	117.317	111.188	2.35859	1107
ENSMUSG00000025647	Shisa5	shisa family member 5						100.529	113.344	111.121	118.581	122.859	110.354	106.632	104.951	111.047	2.56811	1108
ENSMUSG00000026281	Dtymk	deoxythymidylate kinase		Unclassified				95.8081	107.025	112.95	116.153	120.887	111.388	112.543	111.222	110.997	2.59563	1109
ENSMUSG00000024924	Vldlr	very low density lipoprotein receptor						99.9847	103.195	114.14	122.988	130.189	99.5604	112.737	104.358	110.894	3.96849	1110
ENSMUSG00000039195	1110008P14Rik	RIKEN cDNA 1110008P14 gene						116.927	106.479	112.251	112.928	120.595	116.742	106.467	94.6151	110.876	2.91171	1111
ENSMUSG00000051483	Cbr1	carbonyl reductase 1						91.1303	92.6742	106.851	104.022	130.693	114.255	127.21	119.983	110.852	5.24106	1112
ENSMUSG00000044147	Arf6	ADP-ribosylation factor 6						91.7896	112.943	113.859	119.761	114.724	101.652	122.293	108.171	110.649	3.51918	1113
ENSMUSG00000040824	Snrpd2	small nuclear ribonucleoprotein D2						106.083	117.291	111.389	112.81	123.026	103.77	103.051	107.545	110.621	2.457	1114
ENSMUSG00000024099	Ndufv2	NADH:ubiquinone oxidoreductase core subunit V2						105.393	106.08	109.587	103.85	109.526	120.808	110.082	118.379	110.463	2.15521	1115
ENSMUSG00000002014	Ssr4	signal sequence receptor, delta						115.425	113.052	111.673	110.674	116.228	107.196	108.452	100.704	110.425	1.77288	1116
ENSMUSG00000022961	Son	Son DNA binding protein						98.7721	103.894	117.989	133.481	91.6717	96.3017	112.798	125.951	110.107	5.28525	1117
ENSMUSG00000003541	Ier3	immediate early response 3						84.044	103.908	102.449	112.526	141.104	105.619	113.18	117.955	110.098	5.72303	1118
ENSMUSG00000044221	Grsf1	G-rich RNA sequence binding factor 1						95.3675	99.9217	113.736	110.511	101.625	110.837	127.81	120.511	110.04	3.84618	1119
ENSMUSG00000077192	Snora17	small nucleolar RNA, H/ACA box 17						128.51	129.488	74.8375	94.8767	103.069	133.92	102.563	112.082	109.918	7.1555	1120
ENSMUSG00000012483	Rpa3	replication protein A3						122.644	110.425	108.849	101.483	89.7377	118.232	118.769	108.997	109.892	3.75603	1121
ENSMUSG00000041168	Lonp1	lon peptidase 1, mitochondrial						93.8621	106.012	108.888	112.438	122.738	110.997	115.149	108.919	109.875	2.91036	1122
ENSMUSG00000030603	Psmc4	proteasome (prosome, macropain) 26S subunit, ATPase, 4						92.9574	102.003	105.229	110.254	130.597	112.513	115.437	108.987	109.747	3.86805	1123
ENSMUSG00000051355	Commd1	COMM domain containing 1						108.663	106.438	100.444	110.144	122.816	120.906	100.498	107.542	109.681	2.94148	1124
ENSMUSG00000020149	Rab1a	RAB1A, member RAS oncogene family						90.6107	100.933	116.344	105.939	110.699	111.879	118.709	121.446	109.57	3.59638	1125
ENSMUSG00000028419	Chmp5	charged multivesicular body protein 5						96.2972	99.8785	100.83	94.1652	117.206	122.218	124.164	119.788	109.318	4.47007	1126
ENSMUSG00000031960	Aars	alanyl-tRNA synthetase						85.6889	102.917	107.539	123.059	127.946	100.734	119.725	106.259	109.233	4.87258	1127
ENSMUSG00000031987	Egln1	egl-9 family hypoxia-inducible factor 1						101.533	106.252	113.232	111.699	118.218	106.365	114.519	101.954	109.221	2.15525	1128
ENSMUSG00000041936	Agrn	agrin						85.4848	98.9368	111.361	137.195	126.877	89.0892	117.331	107.397	109.209	6.32794	1129
ENSMUSG00000031078	Cttn	cortactin						102.919	102.789	110.173	118.759	113.53	97.7575	118.095	109.569	109.199	2.67868	1130
ENSMUSG00000038482	Tfdp1	transcription factor Dp 1	E2F					92.5308	102.451	113.822	120.361	115.603	103.012	110.645	114.726	109.144	3.22172	1131
ENSMUSG00000018666	Cbx1	chromobox 1						95.8313	101.3	105.566	106.003	110.214	116.299	122.043	115.74	109.125	3.05797	1132
ENSMUSG00000035890	Rnf126	ring finger protein 126						91.2382	109.531	109.207	112.635	136.456	106.52	108.706	96.9102	108.9	4.6964	1133
ENSMUSG00000064326	Siva1	SIVA1, apoptosis-inducing factor						102.711	105.986	104.716	109.205	132.606	106.902	100.989	108.035	108.894	3.51961	1134
ENSMUSG00000022323	Rida	reactive intermediate imine deaminase A homolog						109.403	98.9544	102.684	90.722	105.644	121.338	124.506	117.665	108.865	4.12725	1135
ENSMUSG00000034708	Grn	granulin						97.9777	101.577	118.462	127.706	114.091	101.992	102.784	105.971	108.82	3.63174	1136
ENSMUSG00000026254	Eif4e2	eukaryotic translation initiation factor 4E member 2						109.124	107.322	106.742	106.439	110.301	111.394	112.632	105.743	108.712	0.896929	1137
ENSMUSG00000063511	Snrnp70	small nuclear ribonucleoprotein 70 (U1)						96.0405	106.744	106.952	126.9	112.261	98.9941	109.34	112.279	108.689	3.32331	1138
ENSMUSG00000002870	Mcm2	minichromosome maintenance complex component 2						89.6281	103.503	107.359	114.883	125.094	102.307	115.047	109.986	108.476	3.73671	1139
ENSMUSG00000040078	Ptges3-ps	prostaglandin E synthase 3, pseudogene						99.2579	89.6487	99.8368	97.255	86.3779	120.658	127.787	146.434	108.407	7.42874	1140
ENSMUSG00000092981	Mir5125	microRNA 5125						76.9305	97.497	133.971	169.594	193.684	45.2364	71.3478	78.173	108.304	18.4474	1141
ENSMUSG00000004610	Etfb	electron transferring flavoprotein, beta polypeptide						114.651	98.3994	103.143	98.0103	96.9253	131.611	112.946	109.63	108.165	4.15513	1142
ENSMUSG00000030062	Rpn1	ribophorin I						91.0664	98.8053	108.038	121.437	119.158	105.788	112.437	107.961	108.086	3.53773	1143
ENSMUSG00000070473	Cldn3	claudin 3						96.3158	112.194	110.48	120.146	115.989	106.686	105.511	97.1447	108.058	2.98016	1144
ENSMUSG00000055239	Kcmf1	potassium channel modulatory factor 1						99.7963	100.954	112.935	108.764	113.582	109.136	110.495	108.641	108.038	1.79765	1145
ENSMUSG00000027642	Rpn2	ribophorin II						99.3096	105.189	112.316	116.727	118.441	104.302	102.583	105.068	107.992	2.45981	1146
ENSMUSG00000062169	Cnih4	cornichon family AMPA receptor auxiliary protein 4						95.176	108.209	104.143	107.407	111.527	116.09	114.013	107.33	107.987	2.29211	1147
ENSMUSG00000024870	Rab1b	RAB1B, member RAS oncogene family						94.2743	104.522	100.706	113.99	114.944	113.222	112.334	107.912	107.738	2.61626	1148
ENSMUSG00000029993	Nfu1	NFU1 iron-sulfur cluster scaffold						93.741	97.9939	107.934	91.9088	112.931	117.115	118.492	120.349	107.558	4.0769	1149
ENSMUSG00000030842	Lamtor1	late endosomal/lysosomal adaptor, MAPK and MTOR activator 1						102.779	102.249	105.43	101.793	118.941	110.701	107.76	110.785	107.555	2.06453	1150
ENSMUSG00000030663	1110004F10Rik	RIKEN cDNA 1110004F10 gene						90.1035	100.895	96.9163	97.4809	116.312	117.504	119.136	121.925	107.534	4.39128	1151
ENSMUSG00000026976	Pax8	paired box 8	PAX					102.071	95.0821	107.183	118.301	120.104	102.688	110.556	104.264	107.531	2.99477	1152
ENSMUSG00000031812	Map1lc3b	microtubule-associated protein 1 light chain 3 beta						94.154	104.041	119.062	98.8139	119.147	110.638	112.249	101.431	107.442	3.28435	1153
ENSMUSG00000014195	Dnajc7	DnaJ heat shock protein family (Hsp40) member C7						97.8051	103.896	104.166	119.529	115.277	91.7776	109.003	117.55	107.375	3.46817	1154
ENSMUSG00000005417	Mprip	myosin phosphatase Rho interacting protein						92.9453	99.1477	109.84	125.323	121.807	99.5927	105.034	105.095	107.348	3.97235	1155
ENSMUSG00000024309	Pfdn6	prefoldin subunit 6						92.6351	102.533	110.596	113.886	110.684	109.304	110.994	107.099	107.216	2.39465	1156
ENSMUSG00000031353	Rbbp7	retinoblastoma binding protein 7, chromatin remodeling factor						87.63	100.827	102.687	107.378	108.132	114.957	118.533	116.916	107.133	3.60518	1157
ENSMUSG00000069565	Dazap1	DAZ associated protein 1						107.087	108.511	109.063	119.854	109.904	102.69	99.7576	100.048	107.114	2.31248	1158
ENSMUSG00000025395	Prim1	DNA primase, p49 subunit						93.9656	95.4836	96.799	99.5949	110.39	114.348	123.405	122.148	107.017	4.27927	1159
ENSMUSG00000026509	Capn2	calpain 2						91.5977	99.9604	107.099	114.582	116.986	101.688	111.477	112.678	107.009	3.06044	1160
ENSMUSG00000028820	Sfpq	splicing factor proline/glutamine rich (polypyrimidine tract binding protein associated)						94.1298	105.418	108.65	127.554	96.888	93.524	112.114	116.483	106.845	4.21107	1161
ENSMUSG00000004535	Tax1bp1	Tax1 (human T cell leukemia virus type I) binding protein 1						88.6367	99.6986	104.279	106.035	107.325	109.471	114.765	123.576	106.723	3.63395	1162
ENSMUSG00000067148	Polr1c	polymerase (RNA) I polypeptide C						103.859	105.373	106.839	92.312	110.065	106.753	113.169	114.534	106.613	2.43249	1163
ENSMUSG00000036478	Btg1	B cell translocation gene 1, anti-proliferative						91.2071	91.8911	104.811	107.133	123.148	103.851	122.681	106.355	106.385	4.21829	1164
ENSMUSG00000066900	Suds3	suppressor of defective silencing 3 homolog (S. cerevisiae)						101.808	100.191	100.933	113.961	111.402	106.076	104.158	112.273	106.35	1.94256	1165
ENSMUSG00000021877	Arf4	ADP-ribosylation factor 4						93.8525	98.7183	108.628	100.496	90.4739	116.552	114.158	127.547	106.303	4.47266	1166
ENSMUSG00000001687	Ubl3	ubiquitin-like 3						87.1444	111.352	107.512	109.962	110.22	110.232	101.63	111.145	106.15	2.93766	1167
ENSMUSG00000028693	Nasp	nuclear autoantigenic sperm protein (histone-binding)						87.8304	96.4031	104.336	101.303	106.415	109.566	120.891	120.39	105.892	3.98363	1168
ENSMUSG00000019373	Cops3	COP9 signalosome subunit 3						93.9942	91.4978	98.8541	98.8088	122.692	115.789	108.76	116.414	105.851	4.11348	1169
ENSMUSG00000024735	Prpf19	pre-mRNA processing factor 19						78.0109	100.632	98.2992	117.792	132.582	105.291	107.301	106.642	105.819	5.54127	1170
ENSMUSG00000021096	Ppm1a	protein phosphatase 1A, magnesium dependent, alpha isoform						91.6672	99.3074	107.322	115.431	107.271	96.9105	112.132	115.697	105.717	3.1514	1171
ENSMUSG00000001016	Ilf2	interleukin enhancer binding factor 2						83.7226	98.0461	93.8234	105.04	120.939	108.136	120.923	114.248	105.61	4.67892	1172
ENSMUSG00000032504	Pdcd6ip	programmed cell death 6 interacting protein						91.4293	102.837	108.617	109.279	109.594	104.274	107.748	110.632	105.551	2.23088	1173
ENSMUSG00000022940	Pigp	phosphatidylinositol glycan anchor biosynthesis, class P						115.337	101.639	96.8887	103.871	88.0972	118.526	105.793	114.175	105.541	3.62621	1174
ENSMUSG00000037197	Rbm17	RNA binding motif protein 17						89.9943	95.7958	101.194	106.563	110.631	114.85	106.7	118.275	105.5	3.36118	1175
ENSMUSG00000002015	Bcap31	B cell receptor associated protein 31						91.1473	90.3977	94.5699	105.443	120.326	109.534	118.505	114.012	105.492	4.29121	1176
ENSMUSG00000028059	Arhgef2	rho/rac guanine nucleotide exchange factor (GEF) 2						94.4634	97.4866	111.646	132.298	110.857	87.235	104.897	103.639	105.315	4.83253	1177
ENSMUSG00000022681	Ntan1	N-terminal Asn amidase						108.144	101.727	104.168	95.2968	97.1359	109.213	111.876	114.401	105.245	2.4283	1178
ENSMUSG00000031701	Dnaja2	DnaJ heat shock protein family (Hsp40) member A2						96.6994	99.8843	105.523	110.529	120.079	99.4766	111.487	95.475	104.894	3.037	1179
ENSMUSG00000024909	Efemp2	epidermal growth factor-containing fibulin-like extracellular matrix protein 2						97.4552	101.81	104.717	114.454	118.387	103.365	100.63	98.2127	104.879	2.68427	1180
ENSMUSG00000024414	Mrpl27	mitochondrial ribosomal protein L27						102.672	103.037	106.518	97.7489	113.072	107.333	108.026	100.435	104.855	1.71441	1181
ENSMUSG00000025162	Csnk1d	casein kinase 1, delta		Unclassified				104.057	94.0734	108.164	111.742	115.148	96.4146	99.0377	109.199	104.73	2.68941	1182
ENSMUSG00000028180	Zranb2	zinc finger, RAN-binding domain containing 2						92.9371	96.3895	100.632	101.385	92.7449	110.645	124.352	118.648	104.717	4.21303	1183
ENSMUSG00000003380	Rabac1	Rab acceptor 1 (prenylated)						94.7803	97.8985	98.2344	100.216	127.551	108.061	105.933	104.933	104.701	3.63914	1184
ENSMUSG00000020572	Nampt	nicotinamide phosphoribosyltransferase						91.9799	98.0413	103.925	98.7667	112.526	102.459	118.455	111.444	104.7	3.11365	1185
ENSMUSG00000015937	H2afy	H2A histone family, member Y						85.7735	105.914	108.911	107.451	118.253	101.326	101.293	107.563	104.56	3.27247	1186
ENSMUSG00000030541	Idh2	isocitrate dehydrogenase 2 (NADP+), mitochondrial						83.4998	96.3792	99.3589	107.07	132.536	103.856	107.726	105.883	104.539	4.88938	1187
ENSMUSG00000022307	Oxr1	oxidation resistance 1						87.4302	98.6942	105.863	115.865	108.735	97.0632	107.047	114.744	104.43	3.38259	1188
ENSMUSG00000034484	Snx2	sorting nexin 2						85.4662	92.969	98.9095	92.9966	104.972	115.899	120.413	122.773	104.3	4.95655	1189
ENSMUSG00000020457	Drg1	developmentally regulated GTP binding protein 1						81.9837	93.9216	101.067	100.074	115.343	111.062	116.702	113.396	104.194	4.30561	1190
ENSMUSG00000038650	Rnh1	ribonuclease/angiogenin inhibitor 1						89.8968	99.966	100.264	103.639	126.472	106.517	102.938	103.663	104.169	3.63905	1191
ENSMUSG00000028173	Wls	wntless WNT ligand secretion mediator						87.4971	99.377	104.538	113.354	110.343	99.8112	109.056	108.885	104.108	2.95392	1192
ENSMUSG00000020739	Nup85	nucleoporin 85						78.0657	94.7685	101.453	102.538	120.611	103.607	116.67	114.411	104.016	4.83927	1193
ENSMUSG00000037266	Rsrp1	arginine/serine rich protein 1						72.4072	91.9526	109.972	103.305	114.415	107.879	114.401	117.43	103.97	5.3309	1194
ENSMUSG00000042215	Bag2	BCL2-associated athanogene 2						89.707	93.2941	99.076	95.4102	107.259	106.363	126.763	112.57	103.805	4.27704	1195
ENSMUSG00000024474	Ik	IK cytokine						86.0191	92.3852	98.8909	105.813	117.127	103.674	116.879	109.617	103.801	3.91228	1196
ENSMUSG00000028037	Ifi44	interferon-induced protein 44						88.9397	107.538	101.555	100.692	102.374	96.8693	114.735	117.455	103.77	3.28848	1197
ENSMUSG00000016503	Gtf3a	general transcription factor III A	zf-C2H2					95.9148	103.728	102.495	102.583	109.848	107.861	108.209	99.2491	103.736	1.68264	1198
ENSMUSG00000029404	Arl6ip4	ADP-ribosylation factor-like 6 interacting protein 4						87.9931	97.3374	102.364	99.4488	118.987	112.751	99.8019	110.271	103.619	3.4872	1199
ENSMUSG00000058833	Rex1bd	required for excision 1-B domain containing						103.463	107.964	100.828	105.689	115.85	108.435	96.1869	89.2881	103.463	2.8791	1200
ENSMUSG00000022858	Tra2b	transformer 2 beta						87.753	99.1158	98.5575	100.123	111.178	101.813	110.223	118.74	103.438	3.38658	1201
ENSMUSG00000073481	Marc2	mitochondrial amidoxime reducing component 2						84.4748	98.4319	99.6175	97.9136	104.169	118.664	115.935	108.239	103.431	3.87611	1202
ENSMUSG00000029227	Fip1l1	FIP1 like 1 (S. cerevisiae)						88.8444	98.86	102.456	107.563	110.918	99.909	108.211	109.769	103.316	2.61546	1203
ENSMUSG00000021939	Ctsb	cathepsin B						89.3496	100.933	98.31	112.543	106.896	105.31	110.19	102.886	103.302	2.5883	1204
ENSMUSG00000068036	Afdn	afadin, adherens junction formation factor						90.0105	97.2067	112.997	121.341	111.268	88.9969	103.001	99.8548	103.084	4.03754	1205
ENSMUSG00000058407	Txndc9	thioredoxin domain containing 9						84.0508	99.278	94.8427	102.625	108.771	108.058	112.712	113.067	102.926	3.52068	1206
ENSMUSG00000050708	Ftl1	ferritin light polypeptide 1						136.1	86.8163	100.214	88.2444	78.9009	117.586	114.707	100.128	102.837	6.71035	1207
ENSMUSG00000034880	Mrpl34	mitochondrial ribosomal protein L34						96.2951	100.429	93.6264	102.061	105.943	105.435	116.116	102.647	102.819	2.41573	1208
ENSMUSG00000032199	Polr2m	polymerase (RNA) II (DNA directed) polypeptide M						87.5489	93.4388	100.776	105.265	102.334	107.785	113.746	111.216	102.764	3.12282	1209
ENSMUSG00000018765	Fxr2	fragile X mental retardation, autosomal homolog 2						90.059	91.5146	92.091	116.107	109.179	91.2938	123.901	107.588	102.717	4.67256	1210
ENSMUSG00000064368	mt-Nd6	mitochondrially encoded NADH dehydrogenase 6						70.9322	96.8486	136.613	149.468	101.114	51.6081	98.4666	115.984	102.629	11.3295	1211
ENSMUSG00000020949	Fkbp3	FK506 binding protein 3						99.2891	97.222	98.0145	95.4585	97.1411	106.027	109.691	117.88	102.59	2.79417	1212
ENSMUSG00000025868	Higd2a	HIG1 domain family, member 2A						98.2346	96.2983	101.275	103.578	111.638	102.512	101.52	104.449	102.438	1.62321	1213
ENSMUSG00000020361	Hspa4	heat shock protein 4						92.5963	95.3778	101.082	104.333	94.5603	102.592	112.89	115.741	102.397	2.98933	1214
ENSMUSG00000002043	Trappc6a	trafficking protein particle complex 6A						93.4444	99.3678	98.411	95.9512	122.627	105.328	100.396	103.051	102.322	3.18754	1215
ENSMUSG00000039236	Isg20	interferon-stimulated protein						105.904	103.01	102.25	100.23	108.195	103.486	101.053	93.7968	102.241	1.51053	1216
ENSMUSG00000023307	March5	membrane-associated ring finger (C3HC4) 5						91.8253	96.0543	101.844	102.942	99.1737	104.345	110.045	111.352	102.198	2.3343	1217
ENSMUSG00000001729	Akt1	thymoma viral proto-oncogene 1		Unclassified				86.2376	98.2818	105.057	113.851	109.438	98.4649	104.874	101.322	102.191	2.95292	1218
ENSMUSG00000094627	Gm10182	predicted pseudogene 10182						75.3087	112.649	75.9518	98.8898	137.825	104.339	119.372	92.828	102.145	7.54588	1219
ENSMUSG00000048612	Myof	myoferlin						87.1093	93.9202	99.5493	124.661	102.856	97.5204	97.5951	111.468	101.835	4.08873	1220
ENSMUSG00000024392	Bag6	BCL2-associated athanogene 6						92.3749	99.4141	106.404	116.586	109.494	84.3834	101.03	104.915	101.825	3.55358	1221
ENSMUSG00000024695	Zfp91	zinc finger protein 91	zf-C2H2					91.9192	95.954	105.359	107.197	98.2553	92.5647	112.018	110.777	101.756	2.85496	1222
ENSMUSG00000009630	Ppp2cb	protein phosphatase 2 (formerly 2A), catalytic subunit, beta isoform						83.0317	97.1087	98.0852	106.761	105.785	106.352	110.342	105.743	101.651	3.09841	1223
ENSMUSG00000029467	Atp2a2	ATPase, Ca++ transporting, cardiac muscle, slow twitch 2			ATPases Ca2+ transporting			92.8519	100.394	109.964	121.947	91.9392	92.3253	101.054	102.633	101.639	3.64168	1224
ENSMUSG00000068290	Ddrgk1	DDRGK domain containing 1						81.1622	93.8835	98.7427	102.534	130.735	104.1	104.654	97.2264	101.63	4.94581	1225
ENSMUSG00000015943	Bola1	bolA-like 1 (E. coli)						84.4389	103.162	102.801	101.833	118.953	107.795	104.233	89.438	101.582	3.76258	1226
ENSMUSG00000006095	Tbcb	tubulin folding cofactor B						85.2422	93.534	93.1007	97.0979	127.417	108.037	107.687	100.198	101.539	4.57495	1227
ENSMUSG00000068798	Rap1a	RAS-related protein 1a						82.472	93.5424	94.7458	90.0646	106.181	108.409	116.733	118.758	101.363	4.63136	1228
ENSMUSG00000016921	Srsf6	serine/arginine-rich splicing factor 6						80.9207	90.1895	103.088	107.342	122.083	96.7064	102.535	108.04	101.363	4.38831	1229
ENSMUSG00000017221	Psmd3	proteasome (prosome, macropain) 26S subunit, non-ATPase, 3						85.3344	94.8059	102.371	106.852	117.107	99.7081	103.843	100.713	101.342	3.241	1230
ENSMUSG00000037149	Ddx1	DEAD (Asp-Glu-Ala-Asp) box polypeptide 1						87.0961	95.0916	85.8371	102.199	100.234	110.067	117.763	111.071	101.17	4.06326	1231
ENSMUSG00000002980	Bcam	basal cell adhesion molecule						89.7702	100.131	104.112	120.128	109.504	83.0875	98.1867	103.887	101.101	4.03505	1232
ENSMUSG00000008036	Ap2s1	adaptor-related protein complex 2, sigma 1 subunit						91.0582	98.5246	97.6125	97.2864	117.268	106.677	100.307	98.7002	100.929	2.78013	1233
ENSMUSG00000005481	Ddx39	DEAD (Asp-Glu-Ala-Asp) box polypeptide 39						86.2902	94.0931	94.0016	98.0956	116.649	105.642	107.287	104.645	100.838	3.38206	1234
ENSMUSG00000099021	Rn7s1	7S RNA 1						88.5774	101.694	96.3917	110.967	99.8786	100.222	82.5593	125.716	100.751	4.68219	1235
ENSMUSG00000068328	Aup1	ancient ubiquitous protein 1						94.8344	93	93.8926	99.8132	113.908	99.4085	108.219	102.914	100.749	2.59934	1236
ENSMUSG00000064181	Rab3ip	RAB3A interacting protein						91.8829	99.7083	95.7361	107.718	108.255	98.3117	103.819	99.8832	100.664	2.00796	1237
ENSMUSG00000006299	Aamp	angio-associated migratory protein						83.8503	90.1299	97.9196	98.3865	111.884	103.763	111.667	106.913	100.564	3.54033	1238
ENSMUSG00000023723	Mrps23	mitochondrial ribosomal protein S23						73.3263	93.9857	107.697	97.9812	111.958	108.637	100.461	110.419	100.558	4.50171	1239
ENSMUSG00000060591	Ifitm2	interferon induced transmembrane protein 2						95.2698	91.3059	97.0157	102.79	112.069	96.8863	99.3955	109.051	100.473	2.50179	1240
ENSMUSG00000025156	Gps1	G protein pathway suppressor 1						80.9236	90.9052	97.7826	100.694	123.132	101.73	107.882	100.507	100.445	4.332	1241
ENSMUSG00000031601	Cnot7	CCR4-NOT transcription complex, subunit 7						92.2387	85.2074	100.585	99.9102	96.1029	110.002	110.235	108.527	100.351	3.19348	1242
ENSMUSG00000018326	Ywhab	tyrosine 3-monooxygenase/tryptophan 5-monooxygenase activation protein, beta polypeptide						88.4262	96.9662	94.7077	102.058	95.2111	103.084	108.471	113.725	100.331	2.88806	1243
ENSMUSG00000015013	Trappc2l	trafficking protein particle complex 2-like						84.3632	104.06	104.229	96.7621	113.551	105.636	104.13	88.3411	100.134	3.42681	1244
ENSMUSG00000005667	Mthfd2	methylenetetrahydrofolate dehydrogenase (NAD+ dependent), methenyltetrahydrofolate cyclohydrolase						85.329	97.5325	94.921	106.206	108.281	98.5276	104.324	105.062	100.023	2.67495	1245
ENSMUSG00000020088	Sar1a	secretion associated Ras related GTPase 1A						81.7918	100.03	96.4159	104.638	101.994	96.8898	106.638	109.75	99.7684	3.04209	1246
ENSMUSG00000039041	Adrm1	adhesion regulating molecule 1						77.9534	99.5446	100.015	98.5677	115.384	102.585	104.271	99.2676	99.6986	3.65895	1247
ENSMUSG00000027746	Ufm1	ubiquitin-fold modifier 1						96.6389	94.5783	103.153	98.7608	92.409	100.068	95.7618	115.873	99.6554	2.60074	1248
ENSMUSG00000030298	Sec13	SEC13 homolog, nuclear pore and COPII coat complex component						84.5577	90.0887	91.5602	94.0353	116.719	107.18	110.499	101.374	99.5017	3.9747	1249
ENSMUSG00000015961	Adss	adenylosuccinate synthetase, non muscle						85.9825	91.0193	98.6182	96.45	95.7292	103.075	111.448	113.523	99.4806	3.35709	1250
ENSMUSG00000024479	Mal2	mal, T cell differentiation protein 2						88.615	92.877	100.144	102.16	88.5823	97.4606	109.316	116.564	99.4648	3.48645	1251
ENSMUSG00000038235	F11r	F11 receptor						81.6156	88.5565	93.4037	103.343	102.42	101.337	113.852	111.019	99.4435	3.87785	1252
ENSMUSG00000029454	Mapkapk5	MAP kinase-activated protein kinase 5		MAPK activated protein kinases				91.1487	92.6452	92.5711	98.7085	113.813	102.899	101.128	101.719	99.329	2.63607	1253
ENSMUSG00000029202	Pds5a	PDS5 cohesin associated factor A						94.6801	98.3791	102.406	106.167	86.1053	90.4932	103.777	112.561	99.3211	3.06638	1254
ENSMUSG00000004096	Cwc15	CWC15 spliceosome-associated protein						92.9046	88.1125	93.4195	92.2411	102.915	108.829	108.744	107.336	99.3127	3.01221	1255
ENSMUSG00000105353	Gm42428	predicted gene 42428						92.0101	84.2235	90.6428	163.912	60.6686	57.2445	154.4	90.7769	99.2347	13.9513	1256
ENSMUSG00000057236	Rbbp4	retinoblastoma binding protein 4, chromatin remodeling factor						76.0889	95.8244	97.7803	96.7558	100.216	107.515	113.767	105.607	99.1943	3.95719	1257
ENSMUSG00000058267	Mrps14	mitochondrial ribosomal protein S14						101.058	94.7865	98.739	88.8474	94.4217	105.319	102.68	107.036	99.111	2.17143	1258
ENSMUSG00000032758	Kap	kidney androgen regulated protein						161.33	34.2184	69.8996	23.3889	15.3896	201.4	181.647	102.961	98.7793	26.379	1259
ENSMUSG00000024158	Hagh	hydroxyacyl glutathione hydrolase						85.9639	94.934	93.3148	92.1219	113.818	110.013	100.827	99.1044	98.7622	3.30009	1260
ENSMUSG00000025747	Tyms	thymidylate synthase						81.9022	92.3233	103.471	93.291	110.181	107.183	100.131	100.797	98.6598	3.23223	1261
ENSMUSG00000026966	Ssna1	SS nuclear autoantigen 1						90.7645	94.8705	88.8349	92.9359	112.906	108.347	102.089	96.7867	98.4419	3.04046	1262
ENSMUSG00000001833	Sept7	septin 7						85.2624	88.7243	94.285	89.0347	89.7	105.021	111.63	123.308	98.3707	4.79178	1263
ENSMUSG00000020225	Tmbim4	transmembrane BAX inhibitor motif containing 4						94.8652	95.7141	93.6532	91.6771	101.798	111.191	102.861	94.7139	98.3092	2.29918	1264
ENSMUSG00000026374	Tsn	translin						82.6887	96.0206	99.3346	99.8292	100.122	99.0961	96.2294	111.734	98.1318	2.80562	1265
ENSMUSG00000062203	Gspt1	G1 to S phase transition 1						82.4946	95.7833	91.6285	94.8373	94.7667	102.224	108.491	114.14	98.0457	3.52229	1266
ENSMUSG00000027835	Pdcd10	programmed cell death 10						80.9264	86.8558	94.2528	85.7742	98.8341	111.85	115.179	109.809	97.9352	4.64117	1267
ENSMUSG00000080896	Gm14567	predicted gene 14567						107.01	56.6704	121.056	100.462	166.865	60.4465	76.1155	93.1888	97.7269	12.664	1268
ENSMUSG00000006715	Gmnn	geminin						85.4114	89.1582	96.102	89.0997	101.505	107.661	106.319	106.364	97.7025	3.17225	1269
ENSMUSG00000005410	Mcm5	minichromosome maintenance complex component 5						82.0589	87.3217	103.029	99.123	109.548	98.2104	107.16	95.1648	97.7021	3.32561	1270
ENSMUSG00000026219	Trip12	thyroid hormone receptor interactor 12						86.8902	96.6001	95.3468	113.429	89.0965	83.496	105.356	110.915	97.6412	3.96411	1271
ENSMUSG00000029823	Luc7l2	LUC7-like 2 (S. cerevisiae)						92.8361	94.31	109.059	103.438	87.9933	84.7698	105.444	103.169	97.6274	3.12921	1272
ENSMUSG00000036398	Ppp1r11	protein phosphatase 1, regulatory inhibitor subunit 11						83.1282	99.3752	98.5615	98.1882	115.028	99.9272	102.524	83.8397	97.5715	3.62676	1273
ENSMUSG00000114277	Gm48583	predicted gene, 48583						57.1781	82.6034	166.894	111.515	148.103	94.0684	70.5051	49.64	97.5634	14.9113	1274
ENSMUSG00000029149	Krtcap3	keratinocyte associated protein 3						69.2559	91.1918	87.7138	95.954	128.885	101.118	103.423	102.619	97.52	5.96877	1275
ENSMUSG00000025337	Sbds	SBDS ribosome maturation factor						82.3544	90.0814	94.4188	99.266	104.501	101.33	104.292	103.682	97.4906	2.81913	1276
ENSMUSG00000091512	Lamtor3	late endosomal/lysosomal adaptor, MAPK and MTOR activator 3						84.5253	91.1988	91.8535	96.2651	105.336	102.701	104.29	103.644	97.4766	2.71814	1277
ENSMUSG00000024335	Brd2	bromodomain containing 2						80.6187	91.2697	104.884	109.043	98.0213	88.5196	106.34	100.527	97.403	3.48393	1278
ENSMUSG00000033581	Igf2bp2	insulin-like growth factor 2 mRNA binding protein 2						93.3642	92.9022	96.0381	97.2696	101.707	96.0303	100.313	101.27	97.3617	1.21201	1279
ENSMUSG00000033685	Ucp2	uncoupling protein 2 (mitochondrial, proton carrier)			Solute carriers			84.1935	91.5645	100.307	107.24	99.3232	100.696	98.4028	96.9548	97.3353	2.42561	1280
ENSMUSG00000060904	Arl1	ADP-ribosylation factor-like 1						79.6329	90.9853	93.3416	88.9587	97.7766	107.108	105.911	114.944	97.3322	4.05126	1281
ENSMUSG00000026914	Psmd14	proteasome (prosome, macropain) 26S subunit, non-ATPase, 14						85.0098	90.1424	94.8683	90.1663	98.1796	105.359	101.918	112.814	97.3073	3.23713	1282
ENSMUSG00000019433	Gipc1	GIPC PDZ domain containing family, member 1						88.9441	99.2926	99.3584	101.48	108.304	94.5555	96.2213	90.164	97.29	2.22087	1283
ENSMUSG00000020232	Hmg20b	high mobility group 20B	HMG					85.9242	86.7384	102.713	101.441	115.897	96.5523	96.6273	91.9359	97.2286	3.44081	1284
ENSMUSG00000036390	Gadd45a	growth arrest and DNA-damage-inducible 45 alpha						72.7783	80.6908	89.9911	86.3634	117.94	102.198	111.997	114.478	97.0546	5.99228	1285
ENSMUSG00000046722	Cdc42se1	CDC42 small effector 1						90.4362	91.0541	97.2739	102.244	87.249	99.2206	110.13	98.5171	97.0156	2.60739	1286
ENSMUSG00000024181	Mrpl28	mitochondrial ribosomal protein L28						84.1901	95.3078	94.5162	94.0202	111.886	101.117	102.135	92.8785	97.0065	2.87824	1287
ENSMUSG00000026260	Ndufa10	NADH:ubiquinone oxidoreductase subunit A10						85.9532	93.918	95.4486	97.647	108.825	103.347	97.3762	93.3325	96.981	2.4204	1288
ENSMUSG00000027012	Dync1i2	dynein cytoplasmic 1 intermediate chain 2						79.7302	87.6402	94.0802	94.2225	104.535	98.7924	103.796	112.419	96.9019	3.64968	1289
ENSMUSG00000020680	Taf15	TATA-box binding protein associated factor 15						86.2299	96.5573	106.206	108.013	104.723	81.9273	90.0343	101.414	96.8881	3.47685	1290
ENSMUSG00000033970	Rfc3	replication factor C (activator 1) 3						81.5299	83.8574	90.3423	92.1357	108.586	106.684	104	107.929	96.8829	3.95595	1291
ENSMUSG00000039067	Psmd7	proteasome (prosome, macropain) 26S subunit, non-ATPase, 7						85.486	88.7405	93.8308	93.0864	98.471	102.508	106.596	106.001	96.84	2.77602	1292
ENSMUSG00000035027	Map2k2	mitogen-activated protein kinase kinase 2		Mitogen-activated protein kinase kinases				89.4872	100.055	103.184	105.564	106.039	94.1359	88.6025	86.6038	96.7091	2.81957	1293
ENSMUSG00000001441	Npepps	aminopeptidase puromycin sensitive						93.3994	86.7302	96.8888	100.148	99.7742	95.2062	111.021	90.3559	96.6905	2.6023	1294
ENSMUSG00000039361	Picalm	phosphatidylinositol binding clathrin assembly protein						86.1226	89.6419	100.683	105.554	99.3228	85.8417	99.8639	105.98	96.6263	2.918	1295
ENSMUSG00000026568	Mpc2	mitochondrial pyruvate carrier 2			Solute carriers			107.305	87.0757	83.8057	82.412	86.4569	113.187	101.464	108.141	96.231	4.44025	1296
ENSMUSG00000035478	Mbd3	methyl-CpG binding domain protein 3	MBD					85.3858	87.3139	95.6148	109.071	112.014	95.8841	96.2026	87.9337	96.1775	3.48575	1297
ENSMUSG00000036199	Ndufa13	NADH:ubiquinone oxidoreductase subunit A13						85.2575	95.0682	94.9542	94.2449	111.496	100.308	93.7115	93.5062	96.0684	2.64089	1298
ENSMUSG00000052833	Sae1	SUMO1 activating enzyme subunit 1						82.5258	88.9249	92.0352	96.1342	109.74	97.0923	100.893	101.129	96.0593	2.95062	1299
ENSMUSG00000019782	Rwdd1	RWD domain containing 1						100.636	91.5143	96.5829	83.0541	91.9695	98.1664	101.25	105.136	96.0387	2.46948	1300
ENSMUSG00000031881	Cdh16	cadherin 16						83.4816	97.9357	94.5147	101.996	110.545	92.0986	90.5238	97.055	96.0188	2.85514	1301
ENSMUSG00000053768	Chchd3	coiled-coil-helix-coiled-coil-helix domain containing 3						91.582	99.2829	91.7495	89.3395	94.9998	95.908	101.172	103.705	95.9673	1.79203	1302
ENSMUSG00000059552	Trp53	transformation related protein 53	P53					77.4979	89.6698	97.3586	104.423	101.836	95.8851	100.581	100.381	95.9539	3.07471	1303
ENSMUSG00000028010	Gar1	GAR1 ribonucleoprotein						89.5362	93.4738	92.3263	103.6	101.056	90.1672	99.1491	97.8283	95.8921	1.85247	1304
ENSMUSG00000001435	Col18a1	collagen, type XVIII, alpha 1						85.6353	96.2197	105.064	115.317	100.71	84.4266	89.5908	89.6026	95.8209	3.78123	1305
ENSMUSG00000052337	Immt	inner membrane protein, mitochondrial						78.2414	93.5212	95.1015	98.7932	97.6168	97.0148	101.856	104.273	95.8022	2.79088	1306
ENSMUSG00000023967	Mrps18a	mitochondrial ribosomal protein S18A						93.5748	92.2899	88.3296	91.8469	103.234	101.844	97.3854	97.4372	95.7427	1.82084	1307
ENSMUSG00000056116	H2-T22	histocompatibility 2, T region locus 22						102.609	94.3536	99.1426	91.4025	96.9619	91.5961	95.6245	93.7554	95.6807	1.35021	1308
ENSMUSG00000004843	Chmp2b	charged multivesicular body protein 2B						92.044	88.2993	92.3201	87.3005	90.1716	98.8524	106.621	108.674	95.5353	2.92154	1309
ENSMUSG00000073155	1810058I24Rik	RIKEN cDNA 1810058I24 gene						92.9215	85.3009	99.8846	91.9427	96.7766	98.4194	104.461	94.2191	95.4908	2.04696	1310
ENSMUSG00000106831	Ube2n-ps1	ubiquitin-conjugating enzyme E2N, pseudogene 1						85.6731	93.7327	88.394	94.0106	79.7242	116.814	112.304	92.5098	95.3953	4.5253	1311
ENSMUSG00000026615	Eprs	glutamyl-prolyl-tRNA synthetase						77.3107	92.6752	94.2066	105.08	91.6168	91.322	105.525	104.611	95.2935	3.40168	1312
ENSMUSG00000024811	Tnks2	tankyrase, TRF1-interacting ankyrin-related ADP-ribose polymerase 2						94.1326	96.6128	97.1528	102.882	86.5662	85.3539	99.3133	100.163	95.272	2.23189	1313
ENSMUSG00000027331	Knstrn	kinetochore-localized astrin/SPAG5 binding						85.2802	91.0962	96.8755	100.791	94.5264	99.6391	94.2809	99.5498	95.2549	1.83816	1314
ENSMUSG00000039753	Fbxl5	F-box and leucine-rich repeat protein 5						80.0372	81.9642	97.9876	88.9812	111.957	95.4517	105.918	99.5542	95.2313	3.93295	1315
ENSMUSG00000045302	Preb	prolactin regulatory element binding						78.2367	93.0211	100.537	100.461	109.013	88.1009	92.945	99.2797	95.1993	3.30474	1316
ENSMUSG00000028199	Cryz	crystallin, zeta						87.2968	89.4783	94.6694	92.2058	98.5948	100.465	103.522	95.12	95.1691	1.95005	1317
ENSMUSG00000063065	Mapk3	mitogen-activated protein kinase 3		Mitogen-activated protein kinases				84.8008	91.3108	92.3593	94.9086	108.13	96.5778	102.776	90.3744	95.1548	2.60901	1318
ENSMUSG00000022194	Pabpn1	poly(A) binding protein, nuclear 1						84.7764	85.5036	89.7495	99.418	98.147	101.263	98.8657	102.018	94.9676	2.51817	1319
ENSMUSG00000029610	Aimp2	aminoacyl tRNA synthetase complex-interacting multifunctional protein 2						80.2328	84.722	85.573	88.0849	111.419	104.663	103.412	101.288	94.9243	4.08304	1320
ENSMUSG00000028656	Cap1	CAP, adenylate cyclase-associated protein 1 (yeast)						79.0319	86.1644	93.901	94.8682	102.268	98.8413	103.146	100.774	94.8744	2.99232	1321
ENSMUSG00000020386	Sar1b	secretion associated Ras related GTPase 1B						83.0815	85.6679	86.5239	85.1268	92.0854	108.015	107.954	110.151	94.8256	4.16929	1322
ENSMUSG00000050628	Ubald2	UBA-like domain containing 2						81.4378	86.4482	95.4095	102.137	108.207	95.2016	96.7658	92.7404	94.7935	2.95963	1323
ENSMUSG00000022186	Oxct1	3-oxoacid CoA transferase 1						65.8961	95.851	103.032	103.301	108.984	91.7217	91.6514	97.5735	94.7513	4.6384	1324
ENSMUSG00000019370	Calm3	calmodulin 3						84.6869	95.4977	93.3682	99.216	104.777	91.8329	96.535	92.0711	94.748	2.08345	1325
ENSMUSG00000036323	Srp72	signal recognition particle 72						83.116	92.4141	91.9293	97.7268	92.8097	97.8738	97.357	104.372	94.6998	2.19783	1326
ENSMUSG00000033543	Gtf2a2	general transcription factor II A, 2						99.9211	91.4126	94.5164	85.6164	87.3363	99.852	93.3309	104.163	94.5185	2.28555	1327
ENSMUSG00000101939	Gm28438	predicted gene 28438						0	256.665	0	50.2543	0	0	173.554	274.945	94.4274	42.8424	1328
ENSMUSG00000020250	Txnrd1	thioredoxin reductase 1						78.9222	96.2445	92.3897	105.08	90.7181	88.1149	101.337	100.011	94.1022	2.96714	1329
ENSMUSG00000013701	Timm23	translocase of inner mitochondrial membrane 23						88.0817	88.7478	95.7191	90.9847	97.2783	94.0979	100.38	96.5076	93.9747	1.53766	1330
ENSMUSG00000001783	Rtcb	RNA 2',3'-cyclic phosphate and 5'-OH ligase						85.3287	87.5698	85.6876	96.4811	100.773	92.6308	100.711	102.537	93.965	2.52651	1331
ENSMUSG00000042682	Selenok	selenoprotein K						85.6335	93.3052	90.9426	82.2695	97.5493	98.3325	100.433	101.31	93.7219	2.47486	1332
ENSMUSG00000021124	Vti1b	vesicle transport through interaction with t-SNAREs 1B						93.4919	88.8843	94.5863	86.8822	95.7764	96.4051	98.0219	95.722	93.7213	1.36863	1333
ENSMUSG00000037012	Hk1	hexokinase 1		Unclassified				86.2559	93.3593	94.0634	101.524	98.5659	88.8132	94.0467	92.8725	93.6876	1.71779	1334
ENSMUSG00000052681	Rap1b	RAS related protein 1b						85.6566	86.6073	89.2246	87.3389	87.5862	99.6014	106.062	106.716	93.5991	3.18995	1335
ENSMUSG00000042462	Dctpp1	dCTP pyrophosphatase 1						89.9385	97.6625	91.8499	86.8985	105.035	92.2602	95.284	88.9684	93.4871	2.04683	1336
ENSMUSG00000029538	Srsf9	serine/arginine-rich splicing factor 9						86.5769	89.5362	86.4755	95.2861	92.0394	102.919	98.6667	95.745	93.4056	2.06455	1337
ENSMUSG00000004937	Sgta	small glutamine-rich tetratricopeptide repeat (TPR)-containing, alpha						83.6214	90.5183	93.1876	92.2224	114.254	89.8233	95.5861	87.7876	93.3751	3.24401	1338
ENSMUSG00000039680	Mrps6	mitochondrial ribosomal protein S6						83.0054	90.1752	86.1044	93.0371	98.876	99.8438	99.3428	96.2119	93.3246	2.26184	1339
ENSMUSG00000028140	Mrpl9	mitochondrial ribosomal protein L9						84.4372	90.384	86.8963	90.5726	102.929	96.8811	100.287	93.6556	93.2554	2.27554	1340
ENSMUSG00000027829	Ccnl1	cyclin L1						83.9987	82.8976	99.4615	98.291	84.6844	90.8863	99.4459	106.3	93.2456	3.11791	1341
ENSMUSG00000061360	Phf5a	PHD finger protein 5A						95.0149	88.4056	98.4985	90.2489	93.2933	90.7583	102.961	85.5588	93.0924	1.99377	1342
ENSMUSG00000031785	Adgrg1	adhesion G protein-coupled receptor G1					Adhesion G protein-coupled receptors, subfamily G	80.2813	80.8633	99.6027	125.492	112.063	71.9282	87.0749	87.2073	93.0642	6.38704	1343
ENSMUSG00000027203	Dut	deoxyuridine triphosphatase						86.2181	87.2655	96.8037	89.0116	97.1369	97.4812	91.0499	99.0982	93.0081	1.82952	1344
ENSMUSG00000026003	Acadl	acyl-Coenzyme A dehydrogenase, long-chain						84.5701	84.0897	88.8869	92.2686	96.9607	97.1411	96.4105	103.664	92.999	2.41313	1345
ENSMUSG00000026956	Uap1l1	UDP-N-acteylglucosamine pyrophosphorylase 1-like 1						71.3183	80.5394	86.8904	94.199	120.948	103.378	105.042	81.3789	92.9618	5.72117	1346
ENSMUSG00000001642	Akr1b3	aldo-keto reductase family 1, member B3 (aldose reductase)						74.0888	93.102	84.9605	100.672	113.96	89.2833	91.7172	95.5511	92.9169	4.10224	1347
ENSMUSG00000078656	Vps25	vacuolar protein sorting 25						88.2616	81.3063	86.962	91.6634	100.479	99.5538	95.9444	99.1207	92.9114	2.4727	1348
ENSMUSG00000031807	Pgls	6-phosphogluconolactonase						92.4508	95.3224	88.6408	95.1749	106.185	92.0597	88.329	84.8047	92.871	2.28744	1349
ENSMUSG00000030824	Nucb1	nucleobindin 1						88.1084	94.0306	85.9886	103.998	101.352	87.9397	94.634	85.8965	92.7435	2.47514	1350
ENSMUSG00000014402	Tsg101	tumor susceptibility gene 101						89.1043	85.4024	91.4068	88.7937	90.434	101.648	98.0244	97.1109	92.7405	1.96443	1351
ENSMUSG00000006717	Acot13	acyl-CoA thioesterase 13						88.5604	92.9142	94.4726	88.3984	92.4883	91.2408	94.2208	99.2689	92.6956	1.24259	1352
ENSMUSG00000044155	Lsm8	LSM8 homolog, U6 small nuclear RNA associated						88.3191	89.6275	90.7725	85.5918	90.4266	96.3669	97.7903	101.437	92.5414	1.90643	1353
ENSMUSG00000001211	Agpat3	1-acylglycerol-3-phosphate O-acyltransferase 3						86.9105	98.4744	90.3944	99.9699	107.032	85.1681	92.1592	79.7928	92.4876	3.1444	1354
ENSMUSG00000052151	Plpp2	phospholipid phosphatase 2						86.1015	89.9226	92.7786	94.884	94.3411	95.2442	91.7544	94.8596	92.4857	1.12112	1355
ENSMUSG00000021114	Atp6v1d	ATPase, H+ transporting, lysosomal V1 subunit D						82.5556	84.7687	87.3632	92.0495	99.1616	99.7486	98.0153	95.8868	92.4436	2.40549	1356
ENSMUSG00000029221	Slc30a9	solute carrier family 30 (zinc transporter), member 9			Solute carriers			84.898	90.8455	88.1354	95.6899	86.2183	98.994	89.7275	104.295	92.3504	2.383	1357
ENSMUSG00000030042	Pole4	polymerase (DNA-directed), epsilon 4 (p12 subunit)						84.555	87.5564	86.1895	89.6508	92.8306	99.3889	98.4003	99.3047	92.2345	2.16968	1358
ENSMUSG00000077737	Snord72	small nucleolar RNA, C/D box 72						86.9706	89.1357	80.69	150.428	98.7671	85.5361	71.2124	75.1162	92.232	8.84342	1359
ENSMUSG00000037965	Zc3h7a	zinc finger CCCH type containing 7 A						88.4328	82.1875	93.3131	104.687	91.0681	85.244	88.2243	104.582	92.2174	2.95923	1360
ENSMUSG00000024194	Cuta	cutA divalent cation tolerance homolog						75.1614	87.8083	94.0104	95.871	112.336	95.553	91.0546	85.935	92.2162	3.74069	1361
ENSMUSG00000039218	Srrm2	serine/arginine repetitive matrix 2						81.8642	85.1473	100.551	107.292	100.196	76.1219	93.9473	92.4314	92.1939	3.73125	1362
ENSMUSG00000046865	Fbl	fibrillarin						74.6798	88.0565	88.2498	94.8122	112.227	86.8481	94.3389	97.8013	92.1267	3.80827	1363
ENSMUSG00000030688	Stard10	START domain containing 10						90.0829	94.3781	91.1407	94.7016	96.1271	91.8265	87.8278	89.8619	91.9933	1.00365	1364
ENSMUSG00000078453	Abracl	ABRA C-terminal like						94.6939	88.595	98.9491	78.8202	78.8435	109.799	95.6879	90.5215	91.9888	3.65117	1365
ENSMUSG00000009863	Sdhb	succinate dehydrogenase complex, subunit B, iron sulfur (Ip)						79.1699	88.8783	88.3478	87.6738	102.852	95.2849	95.9189	97.3669	91.9366	2.60186	1366
ENSMUSG00000031585	Gtf2e2	general transcription factor II E, polypeptide 2 (beta subunit)						77.4154	77.6403	82.4734	87.0977	107.467	103.553	97.1191	102.015	91.8476	4.29433	1367
ENSMUSG00000101878	Gm8203	predicted pseudogene 8203						54.8348	115.535	102.092	177.931	232.632	0	50.8036	0	91.7285	29.2229	1368
ENSMUSG00000006058	Snf8	SNF8, ESCRT-II complex subunit, homolog (S. cerevisiae)						92.0041	88.865	89.0693	88.0511	91.483	95.3357	95.4698	93.2972	91.6969	1.02113	1369
ENSMUSG00000005354	Txn2	thioredoxin 2						83.7937	86.5234	87.5513	96.3155	100.316	92.1325	99.8508	86.9421	91.6782	2.2808	1370
ENSMUSG00000038462	Uqcrfs1	ubiquinol-cytochrome c reductase, Rieske iron-sulfur polypeptide 1						83.1883	87.756	88.5389	86.0074	98.5779	97.2944	95.3492	96.7008	91.6766	2.10155	1371
ENSMUSG00000052144	Ppp4r2	protein phosphatase 4, regulatory subunit 2						81.0638	90.409	86.8738	99.631	85.4986	92.8217	97.3755	99.2406	91.6143	2.42648	1372
ENSMUSG00000023106	Denr	density-regulated protein						75.3193	94.1075	96.7857	102.245	94.953	92.5628	88.6334	87.7762	91.5478	2.82565	1373
ENSMUSG00000015312	Gadd45b	growth arrest and DNA-damage-inducible 45 beta						77.7573	77.0266	86.5207	82.6298	116.711	97.7696	103.684	89.6279	91.4658	4.8709	1374
ENSMUSG00000001552	Jup	junction plakoglobin						74.9844	94.6695	91.9049	104.246	100.763	87.1143	91.269	86.3823	91.4167	3.209	1375
ENSMUSG00000027775	Mfsd1	major facilitator superfamily domain containing 1						80.9452	88.5082	94.2076	94.1102	88.2293	90.2317	97.1173	97.7908	91.3926	1.97231	1376
ENSMUSG00000029860	Zyx	zyxin						76.879	87.2332	90.7496	100.178	109.549	88.5875	91.4076	86.529	91.3891	3.45045	1377
ENSMUSG00000027810	Eif2a	eukaryotic translation initiation factor 2A						87.7421	84.9576	88.9441	81.9292	86.5765	96.8235	99.685	103.929	91.3234	2.76735	1378
ENSMUSG00000025498	Irf7	interferon regulatory factor 7	IRF					96.364	100.028	86.7178	95.9687	96.7468	82.2093	87.9402	83.0072	91.1228	2.45217	1379
ENSMUSG00000017421	Zfp207	zinc finger protein 207						78.9255	82.8538	91.2674	89.4879	95.1868	94.1451	99.6453	96.8057	91.0397	2.50131	1380
ENSMUSG00000000751	Rpa1	replication protein A1						70.713	85.8823	90.1514	101.806	95.4843	90.4866	93.7751	99.9903	91.0362	3.44379	1381
ENSMUSG00000060992	Copz1	coatomer protein complex, subunit zeta 1						78.6943	85.0124	90.3059	89.7886	100.415	92.5015	99.031	92.0974	90.9807	2.48502	1382
ENSMUSG00000045962	Wnk1	WNK lysine deficient protein kinase 1		WNK lysine deficient protein kinases				86.2356	96.4885	96.9824	113.808	69.9959	75.3106	94.1348	94.4548	90.9264	4.85114	1383
ENSMUSG00000001473	Tubb6	tubulin, beta 6 class V						80.6999	90.5174	89.9806	95.8887	101.673	90.6117	88.5073	89.4054	90.9104	2.12976	1384
ENSMUSG00000037499	Nenf	neuron derived neurotrophic factor						92.6315	93.4097	86.0677	85.7093	104.307	86.9703	90.5926	87.1573	90.8556	2.19112	1385
ENSMUSG00000031819	Emc8	ER membrane protein complex subunit 8						69.541	99.9515	84.0971	89.1819	107.945	97.0973	95.5095	83.3311	90.8319	4.21481	1386
ENSMUSG00000043510	Hscb	HscB iron-sulfur cluster co-chaperone						93.8884	94.9203	93.5942	95.2363	76.073	95.3566	89.7833	86.9309	90.7229	2.34371	1387
ENSMUSG00000029617	Ccz1	CCZ1 vacuolar protein trafficking and biogenesis associated						81.0652	83.3977	84.2113	87.3718	93.163	93.7227	98.9327	102.762	90.5783	2.76354	1388
ENSMUSG00000007564	Ppp2r1a	protein phosphatase 2, regulatory subunit A, alpha						82.4716	86.018	91.4795	89.2721	97.671	92.191	92.4641	92.4183	90.4982	1.63024	1389
ENSMUSG00000020190	Mknk2	MAP kinase-interacting serine/threonine kinase 2		MAPK activated protein kinases				83.2844	91.2286	95.0137	101.3	89.0979	86.3002	91.4069	85.0821	90.3392	2.06667	1390
ENSMUSG00000002767	Mrpl2	mitochondrial ribosomal protein L2						77.6171	87.7535	96.2135	85.809	104.046	94.179	86.4604	89.2918	90.1712	2.80973	1391
ENSMUSG00000055301	Adh7	alcohol dehydrogenase 7 (class IV), mu or sigma polypeptide						66.3869	74.6376	81.1282	92.8433	94.3438	86.6789	114.361	110.587	90.121	5.86678	1392
ENSMUSG00000033998	Kcnk1	potassium channel, subfamily K, member 1				Potassium two pore domain channel subfamily K		76.9836	88.1007	91.5558	103.672	104.406	83.6953	82.2044	90.1219	90.0924	3.45988	1393
ENSMUSG00000028797	Tmem234	transmembrane protein 234						87.0845	89.3404	87.7788	91.7621	95.7068	92.6692	86.6767	89.6685	90.0859	1.10001	1394
ENSMUSG00000061665	Cd2ap	CD2-associated protein						77.812	86.839	91.9614	93.1153	86.1332	87.4742	92.8927	104.337	90.0706	2.69689	1395
ENSMUSG00000002297	Dbf4	DBF4 zinc finger						81.5201	85.2169	87.6811	93.2917	86.865	89.7557	89.7535	104.968	89.8816	2.48168	1396
ENSMUSG00000027018	Hat1	histone aminotransferase 1						77.5005	83.0339	90.5129	79.2891	89.3174	99.3949	95.8995	103.597	89.8181	3.34848	1397
ENSMUSG00000017009	Sdc4	syndecan 4						83.538	85.1437	84.6663	90.9902	92.5335	92.489	96.3313	92.2038	89.737	1.64627	1398
ENSMUSG00000051234	Rnf7	ring finger protein 7						82.1547	83.5235	92.4748	82.9758	91.2827	102.281	93.6365	89.3355	89.7081	2.40692	1399
ENSMUSG00000020720	Psmd12	proteasome (prosome, macropain) 26S subunit, non-ATPase, 12						79.042	85.848	79.2358	84.301	87.4017	98.3473	100.97	102.043	89.6486	3.34468	1400
ENSMUSG00000025982	Sf3b1	splicing factor 3b, subunit 1						79.7354	84.0194	88.6991	93.4937	91.9215	87.364	94.8739	96.5714	89.5848	2.03201	1401
ENSMUSG00000052926	Rnaseh2a	ribonuclease H2, large subunit						69.1111	89.5923	88.0189	89.2619	110.818	80.2094	95.0931	94.3858	89.5614	4.25498	1402
ENSMUSG00000030107	Usp18	ubiquitin specific peptidase 18						70.0156	85.2777	75.5693	84.8893	107.571	94.9017	97.3495	100.404	89.4972	4.52972	1403
ENSMUSG00000025208	Mrpl43	mitochondrial ribosomal protein L43						74.2231	88.5197	86.951	86.189	97.7826	94.132	96.9849	91.1352	89.4897	2.67448	1404
ENSMUSG00000029076	Sdf4	stromal cell derived factor 4						80.0278	82.9516	85.6743	89.4994	104.296	91.3679	94.4588	87.3408	89.452	2.66886	1405
ENSMUSG00000013822	Elof1	ELF1 homolog, elongation factor 1						88.6295	87.6774	89.0632	85.8846	96.1578	93.5558	89.2235	85.1974	89.4237	1.3138	1406
ENSMUSG00000020863	Luc7l3	LUC7-like 3 (S. cerevisiae)						82.1219	87.9787	86.2414	94.0715	79.6377	94.3123	94.2021	96.6748	89.405	2.24487	1407
ENSMUSG00000024845	Tmem134	transmembrane protein 134						92.973	88.8794	83.9146	89.255	99.6981	92.8665	85.747	81.7622	89.387	2.03932	1408
ENSMUSG00000021196	Pfkp	phosphofructokinase, platelet		Unclassified				82.1121	88.8914	88.7542	87.134	102.04	83.1263	95.0131	87.7313	89.3502	2.28472	1409
ENSMUSG00000020290	Xpo1	exportin 1						77.8866	81.2594	91.6176	91.7307	82.4025	88.3096	95.3928	105.118	89.2147	3.11116	1410
ENSMUSG00000052752	Traf7	TNF receptor-associated factor 7						83.1664	86.2124	89.3143	98.1595	103.416	86.0935	84.6459	82.1509	89.1449	2.69848	1411
ENSMUSG00000024404	Riok3	RIO kinase 3		Unclassified				83.2505	78.4764	88.5963	95.5131	89.6652	96.9078	88.8356	91.7987	89.1304	2.14262	1412
ENSMUSG00000029110	Rnf4	ring finger protein 4						75.0933	82.0893	88.8388	89.3022	94.9732	89.3287	91.1684	102.102	89.1119	2.84515	1413
ENSMUSG00000053559	Smagp	small cell adhesion glycoprotein						92.6548	90.4601	90.2375	87.8263	90.5818	85.1467	91.8	83.5253	89.0291	1.14607	1414
ENSMUSG00000027315	Spint1	serine protease inhibitor, Kunitz type 1						74.4905	91.2575	86.0107	102.754	92.4638	86.6536	86.4364	91.8538	88.9901	2.82199	1415
ENSMUSG00000040463	Mybbp1a	MYB binding protein (P160) 1a						69.3607	82.4581	85.2787	99.346	97.983	85.5376	97.0883	94.5333	88.9482	3.63044	1416
ENSMUSG00000047879	Usp14	ubiquitin specific peptidase 14						77.1703	80.2106	92.6134	81.2763	86.8602	95.0556	96.717	101.554	88.9322	3.12903	1417
ENSMUSG00000078652	Psme3	proteaseome (prosome, macropain) activator subunit 3 (PA28 gamma, Ki)						82.7759	84.8125	103.601	84.3499	79.1709	92.1227	90.0219	93.5894	88.8056	2.73621	1418
ENSMUSG00000047187	Rab2a	RAB2A, member RAS oncogene family						76.5706	82.6093	85.2675	87.6088	86.0737	96.2336	94.021	101.834	88.7773	2.87107	1419
ENSMUSG00000031683	Lsm6	LSM6 homolog, U6 small nuclear RNA and mRNA degradation associated						82.0403	83.6322	85.0954	90.3923	90.5416	94.4481	88.3419	95.5979	88.7612	1.74235	1420
ENSMUSG00000027637	Rab5if	RAB5 interacting factor						79.1633	83.0295	85.6477	89.9177	89.3433	91.5369	94.7182	95.6364	88.6241	2.0118	1421
ENSMUSG00000070572	Trmt112-ps2	tRNA methyltransferase 11-2, pseudogene 2						96.1655	95.547	89.1889	80.272	92.2334	83.18	90.3105	81.8403	88.5922	2.18107	1422
ENSMUSG00000053898	Ech1	enoyl coenzyme A hydratase 1, peroxisomal						81.9076	81.6831	78.8806	78.599	103.637	96.8243	95.757	90.76	88.5061	3.37189	1423
ENSMUSG00000015750	Aph1a	aph1 homolog A, gamma secretase subunit						77.9167	82.931	96.2912	92.4994	86.1501	90.2469	90.6542	90.8097	88.4374	2.06257	1424
ENSMUSG00000025651	Uqcrc1	ubiquinol-cytochrome c reductase core protein 1						72.5269	82.9602	83.3876	88.2753	103.83	96.3174	93.1751	86.9315	88.4254	3.36048	1425
ENSMUSG00000024902	Mrpl11	mitochondrial ribosomal protein L11						85.9746	84.7669	89.6154	80.3598	91.9717	91.2176	90.9743	92.3549	88.4044	1.51285	1426
ENSMUSG00000037096	Gm9762	predicted pseudogene 9762						79.4236	79.5393	77.4881	92.8407	76.1837	98.2735	111.008	92.0113	88.346	4.36855	1427
ENSMUSG00000027804	Ppid	peptidylprolyl isomerase D (cyclophilin D)						74.005	81.8095	85.7325	86.9956	84.269	90.824	101.891	101.021	88.3185	3.33789	1428
ENSMUSG00000035227	Spcs2	signal peptidase complex subunit 2 homolog (S. cerevisiae)						79.3472	83.4568	82.9525	82.5732	96.7216	94.2726	99.2459	87.8154	88.2981	2.64455	1429
ENSMUSG00000053012	Krcc1	lysine-rich coiled-coil 1						81.3235	85.281	83.2863	80.1941	81.5734	96.441	92.9356	105.32	88.2944	3.1941	1430
ENSMUSG00000023150	Ivns1abp	influenza virus NS1A binding protein						73.2654	78.3931	87.403	99.052	84.5098	85.6082	95.8797	102.124	88.2794	3.56257	1431
ENSMUSG00000024941	Scyl1	SCY1-like 1 (S. cerevisiae)		SCY1 like pseudokinases				72.9162	82.6632	83.7815	91.959	112.545	85.4783	92.0398	83.5433	88.1158	4.08475	1432
ENSMUSG00000021036	Sptlc2	serine palmitoyltransferase, long chain base subunit 2						72.0427	81.816	91.158	96.075	94.3563	84.7137	89.0913	95.1683	88.0527	2.90263	1433
ENSMUSG00000022433	Csnk1e	casein kinase 1, epsilon		Unclassified				78.1773	86.9128	81.7173	95.5592	99.5311	83.5579	91.8245	87.0885	88.0461	2.54398	1434
ENSMUSG00000094013	Gm25829	predicted gene, 25829						79.5825	92.0251	110.461	63.4514	48.9634	105.976	101.069	102.281	87.9761	7.81014	1435
ENSMUSG00000057738	Sptan1	spectrin alpha, non-erythrocytic 1						75.7732	90.6661	87.5499	102.498	88.2865	80.3933	88.544	90.0817	87.9741	2.76963	1436
ENSMUSG00000024091	Vapa	vesicle-associated membrane protein, associated protein A						72.989	82.2492	91.9916	83.5082	82.4104	93.5443	101.197	94.5876	87.8097	3.20091	1437
ENSMUSG00000021792	Fam213a	family with sequence similarity 213, member A						85.5222	82.7666	97.0465	85.9361	90.7488	87.6354	85.2004	87.5573	87.8017	1.55285	1438
ENSMUSG00000085156	Snhg15	small nucleolar RNA host gene 15						81.1037	79.9232	75.8018	85.7004	96.0027	89.5658	100.364	93.9151	87.797	3.04985	1439
ENSMUSG00000047721	Bola2	bolA-like 2 (E. coli)						88.5404	87.1378	83.181	94.2275	95.1057	93.0405	81.5321	78.5826	87.6685	2.18999	1440
ENSMUSG00000046879	Irgm1	immunity-related GTPase family M member 1						78.9919	84.83	82.0328	96.1382	85.7234	83.93	95.112	94.4786	87.6546	2.33902	1441
ENSMUSG00000029213	Commd8	COMM domain containing 8						77.475	80.7008	83.6353	81.2748	91.4284	93.041	94.1183	98.5386	87.5265	2.71307	1442
ENSMUSG00000051043	Gprc5c	G protein-coupled receptor, family C, group 5, member C					G protein-coupled receptors, Class C orphans	77.4695	82.7029	90.1969	99.4843	87.7378	83.1097	91.7928	86.656	87.3937	2.3638	1443
ENSMUSG00000021493	Pdlim7	PDZ and LIM domain 7						74.8921	81.9434	80.8882	91.6379	112.711	86.4388	84.2436	86.3185	87.3842	4.00731	1444
ENSMUSG00000053470	Kdm3a	lysine (K)-specific demethylase 3A						83.2648	76.8332	85.0744	91.7279	114.262	82.1515	83.2583	81.7255	87.2872	4.12152	1445
ENSMUSG00000006373	Pgrmc1	progesterone receptor membrane component 1						72.7012	77.7747	84.0329	84.1171	90.8282	92.7216	97.5384	98.2625	87.2471	3.24994	1446
ENSMUSG00000068856	Sf3b4	splicing factor 3b, subunit 4						73.2652	79.291	93.748	95.0163	88.6915	84.8652	90.553	91.9521	87.1728	2.67995	1447
ENSMUSG00000006315	Tmem147	transmembrane protein 147						74.9795	82.9793	88.0341	87.4826	101.509	87.7792	88.7433	85.6933	87.15	2.59682	1448
ENSMUSG00000022770	Dlg1	discs large MAGUK scaffold protein 1		Membrane associated guanylate kinases				81.6462	85.4514	85.8743	94.6201	84.6862	78.5994	88.7635	97.4763	87.1397	2.23217	1449
ENSMUSG00000022570	Tsta3	tissue specific transplantation antigen P35B						77.34	86.1523	84.9903	84.3575	97.8973	92.0698	90.9031	83.1293	87.105	2.23463	1450
ENSMUSG00000087687	Pet100	PET100 homolog						86.5463	94.92	98.2986	88.2647	101.3	71.529	73.6348	82.1928	87.0858	3.86771	1451
ENSMUSG00000037487	Ubr5	ubiquitin protein ligase E3 component n-recognin 5						78.8992	84.3063	94.3536	105.45	83.5862	73.002	86.2571	90.6925	87.0683	3.50789	1452
ENSMUSG00000047126	Cltc	clathrin, heavy polypeptide (Hc)						84.7589	87.0683	89.5743	93.3058	72.4425	80.6709	88.6514	99.1471	86.9524	2.84622	1453
ENSMUSG00000026201	Stk16	serine/threonine kinase 16		Unclassified				76.4714	82.0088	85.5229	92.4814	98.0866	87.5395	88.3196	85.0191	86.9312	2.30226	1454
ENSMUSG00000024012	Mtch1	mitochondrial carrier 1			Solute carriers			78.2036	83.9465	84.7122	90.1133	92.6803	89.451	86.1273	89.9917	86.9032	1.63411	1455
ENSMUSG00000043962	Thrap3	thyroid hormone receptor associated protein 3						75.2843	84.9019	90.8419	92.0874	79.3706	89.9866	88.5625	93.7398	86.8469	2.30337	1456
ENSMUSG00000022391	Rangap1	RAN GTPase activating protein 1						73.6727	86.3534	86.0861	98.0397	93.2249	86.6637	86.1926	84.4617	86.8369	2.48744	1457
ENSMUSG00000045319	Proser2	proline and serine rich 2						72.3734	79.6104	89.1068	85.5059	115.043	82.346	88.3684	82.1297	86.8105	4.44932	1458
ENSMUSG00000019659	Ccdc12	coiled-coil domain containing 12						77.8206	88.0281	81.1289	80.321	101.034	90.3624	85.1849	90.3062	86.7733	2.62703	1459
ENSMUSG00000024854	Pold4	polymerase (DNA-directed), delta 4						81.225	83.8881	81.1093	81.2469	96.4069	92.2189	92.4093	85.6761	86.7726	2.14293	1460
ENSMUSG00000116048	Sept2	septin 2						75.9636	80.3968	82.5701	86.5776	77.5694	91.593	96.635	102.335	86.7051	3.33419	1461
ENSMUSG00000021000	Mia2	melanoma inhibitory activity 2						82.2215	85.6676	86.0086	92.9493	83.6402	81.8027	89.9656	91.1244	86.6725	1.48945	1462
ENSMUSG00000036620	Mgat4b	mannoside acetylglucosaminyltransferase 4, isoenzyme B						76.4229	86.8078	86.0299	88.2169	91.9824	85.2916	89.415	89.0631	86.6537	1.6432	1463
ENSMUSG00000028426	Rad23b	RAD23 homolog B, nucleotide excision repair protein						69.1773	91.6938	87.7252	91.3645	95.0316	77.9338	92.1315	88.0511	86.6386	3.08322	1464
ENSMUSG00000026456	Cyb5r1	cytochrome b5 reductase 1						63.9825	81.6217	87.2468	97.7774	94.1013	83.8322	97.3807	86.3933	86.542	3.87726	1465
ENSMUSG00000064193	Gm4735	predicted gene 4735						79.6014	86.3169	89.3692	79.8353	84.2868	110.763	86.836	75.0644	86.5091	3.83769	1466
ENSMUSG00000029687	Ezh2	enhancer of zeste 2 polycomb repressive complex 2 subunit						75.325	85.4639	92.4164	84.2699	87.6609	92.8075	79.988	94.0186	86.4938	2.33758	1467
ENSMUSG00000022558	Mroh1	maestro heat-like repeat family member 1						65.7388	81.8907	92.9971	107.367	105.112	75.7316	77.3589	85.1723	86.4211	5.13662	1468
ENSMUSG00000019777	Hdac2	histone deacetylase 2						76.2345	79.0507	82.9314	83.9505	82.1464	89.0991	95.0848	102.439	86.367	3.08629	1469
ENSMUSG00000052776	Oas1a	2'-5' oligoadenylate synthetase 1A						78.6493	87.2643	82.7095	84.053	98.6095	87.297	85.6254	86.3083	86.3145	2.02826	1470
ENSMUSG00000032604	Qars	glutaminyl-tRNA synthetase						76.3472	80.8003	74.5097	92.9789	90.9789	98.4954	91.2544	84.98	86.2931	3.01731	1471
ENSMUSG00000092607	Scnm1	sodium channel modifier 1						69.8468	78.4543	82.6587	80.4472	97.2906	96.926	98.7658	85.426	86.2269	3.70714	1472
ENSMUSG00000030335	Mrpl51	mitochondrial ribosomal protein L51						74.6052	85.08	82.7423	96.2124	99.2045	76.8859	87.4731	87.3809	86.198	3.00828	1473
ENSMUSG00000065990	Aurkaip1	aurora kinase A interacting protein 1						77.296	80.8245	83.8689	84.3601	101.057	89.3711	88.8986	83.8121	86.1861	2.53817	1474
ENSMUSG00000005656	Snx6	sorting nexin 6						78.2649	82.1492	81.855	82.0602	89.989	89.238	93.437	92.1001	86.1367	2.00948	1475
ENSMUSG00000037458	Azin1	antizyme inhibitor 1						72.716	76.2979	84.2109	92.7818	78.4335	90.2051	98.9435	95.239	86.1035	3.40045	1476
ENSMUSG00000039756	Dnttip2	deoxynucleotidyltransferase, terminal, interacting protein 2						70.8665	77.6842	82.5271	81.794	87.6374	91.2755	99.1271	97.6372	86.0686	3.44898	1477
ENSMUSG00000007867	Ift43	intraflagellar transport 43						82.5587	79.0421	77.3286	83.5076	95.1628	87.214	93.4272	89.9659	86.0259	2.30674	1478
ENSMUSG00000029017	Pmpcb	peptidase (mitochondrial processing) beta						74.8031	80.5169	84.2029	85.912	101.678	85.4234	87.7404	87.2085	85.9357	2.7034	1479
ENSMUSG00000029086	Prom1	prominin 1						76.2005	83.6799	85.7322	97.6193	79.3799	85.1894	81.4272	98.039	85.9084	2.8245	1480
ENSMUSG00000024393	Prrc2a	proline-rich coiled-coil 2A						76.3338	77.3102	91.2453	99.7616	94.5596	72.2429	90.9789	84.333	85.8457	3.47375	1481
ENSMUSG00000017286	Glod4	glyoxalase domain containing 4						73.7985	75.5284	88.2827	87.9476	91.6997	97.2175	88.6979	82.896	85.7585	2.81038	1482
ENSMUSG00000020994	Pnn	pinin						74.6454	81.4391	89.4686	88.0544	83.9109	85.2746	92.0019	91.2309	85.7532	2.04315	1483
ENSMUSG00000057506	Bloc1s2	biogenesis of lysosomal organelles complex-1, subunit 2						78.2882	79.2386	83.2787	88.7112	86.1703	87.1931	92.4388	90.2642	85.6979	1.79438	1484
ENSMUSG00000035781	R3hdm4	R3H domain containing 4						76.1862	82.3036	86.0038	85.2487	93.5449	86.5622	91.9494	83.7603	85.6949	1.92469	1485
ENSMUSG00000008333	Snrpb2	U2 small nuclear ribonucleoprotein B						85.1103	79.5189	79.8767	73.4363	76.4774	87.9014	98.64	103.759	85.5899	3.79432	1486
ENSMUSG00000042572	Ube2q1	ubiquitin-conjugating enzyme E2Q family member 1						73.8514	85.7527	84.0456	89.1897	87.4569	84.5134	88.5063	89.771	85.3859	1.80999	1487
ENSMUSG00000032314	Etfa	electron transferring flavoprotein, alpha polypeptide						73.5234	78.3288	84.9555	75.8551	89.8643	94.0641	93.1228	92.7157	85.3037	2.95937	1488
ENSMUSG00000017781	Pitpna	phosphatidylinositol transfer protein, alpha						72.8421	84.8741	84.1893	90.9878	90.0117	86.2907	85.482	87.5621	85.28	1.96983	1489
ENSMUSG00000044783	Hjurp	Holliday junction recognition protein						81.4711	78.9738	92.6556	93.123	94.7992	74.7624	87.9719	78.4128	85.2712	2.75754	1490
ENSMUSG00000025823	Pdia4	protein disulfide isomerase associated 4						74.761	79.5636	89.4563	97.0616	84.2396	85.1969	81.2698	90.1739	85.2153	2.46642	1491
ENSMUSG00000020831	0610010K14Rik	RIKEN cDNA 0610010K14 gene						86.0735	86.7386	82.8112	84.2112	89.8741	88.538	80.2769	83.1496	85.2091	1.12793	1492
ENSMUSG00000000171	Sdhd	succinate dehydrogenase complex, subunit D, integral membrane protein						79.5296	78.0956	80.5689	80.9085	90.5531	89.2723	87.4909	95.2516	85.2088	2.21202	1493
ENSMUSG00000033184	Tmed7	transmembrane p24 trafficking protein 7						72.9796	83.9981	87.9198	91.6961	79.2479	78.4671	93.688	93.6105	85.2009	2.75137	1494
ENSMUSG00000013160	Atp6v0d1	ATPase, H+ transporting, lysosomal V0 subunit D1						74.073	81.1676	82.1799	85.5237	97.2372	83.0979	88.8118	89.4378	85.1911	2.4261	1495
ENSMUSG00000097772	5430416N02Rik	RIKEN cDNA 5430416N02 gene						83.5818	83.3613	78.4349	78.0731	79.9852	92.9352	95.6329	88.8569	85.1077	2.35939	1496
ENSMUSG00000014504	Srp19	signal recognition particle 19						79.233	82.9358	85.8411	80.2957	81.964	89.0622	88.7698	92.3323	85.0542	1.65845	1497
ENSMUSG00000031821	Gins2	GINS complex subunit 2 (Psf2 homolog)						82.2346	76.6446	85.1189	81.3622	95.8246	81.5498	88.368	88.8778	84.9975	2.09661	1498
ENSMUSG00000026277	Stk25	serine/threonine kinase 25 (yeast)		Unclassified				72.4553	76.9255	83.682	87.2571	101.843	79.612	90.5888	87.1539	84.9397	3.21261	1499
ENSMUSG00000030697	Ppp4c	protein phosphatase 4, catalytic subunit						75.6101	83.7678	83.8224	81.4837	95.5142	88.3747	89.25	81.2712	84.8868	2.14327	1500
ENSMUSG00000053453	Thoc7	THO complex 7						86.2896	83.3269	80.6263	73.8215	82.2854	92.2571	91.6205	88.818	84.8806	2.18304	1501
ENSMUSG00000039530	Tusc3	tumor suppressor candidate 3			Solute carriers			73.1037	78.4733	83.8714	80.525	92.0194	88.7029	89.9797	92.1913	84.8583	2.4812	1502
ENSMUSG00000015653	Steap2	six transmembrane epithelial antigen of prostate 2						74.3043	86.0859	92.0771	99.7543	79.6105	72.4719	81.91	92.4479	84.8327	3.36513	1503
ENSMUSG00000003868	Ruvbl2	RuvB-like protein 2						76.9227	79.9907	81.104	79.7641	94.7758	88.971	87.7488	88.9891	84.7833	2.185	1504
ENSMUSG00000029048	Rer1	retention in endoplasmic reticulum sorting receptor 1						72.3562	81.1993	82.1444	88.097	91.6081	87.7439	88.6727	86.4345	84.782	2.14817	1505
ENSMUSG00000027455	Nsfl1c	NSFL1 (p97) cofactor (p47)						70.1234	77.6949	76.9882	85.3435	95.7759	84.122	92.6952	95.2898	84.7541	3.32868	1506
ENSMUSG00000022893	Adamts1	a disintegrin-like and metallopeptidase (reprolysin type) with thrombospondin type 1 motif, 1						76.6693	77.7474	92.4874	104.044	92.7186	63.0916	94.6884	76.551	84.7497	4.71516	1507
ENSMUSG00000041431	Ccnb1	cyclin B1						73.1059	82.181	75.8726	86.5564	96.4238	86.335	85.7526	90.1893	84.5521	2.65022	1508
ENSMUSG00000022974	Paxbp1	PAX3 and PAX7 binding protein 1						73.1106	74.838	87.9941	93.4358	97.7666	72.5389	89.4917	86.9983	84.5217	3.44694	1509
ENSMUSG00000020736	Nt5c	5',3'-nucleotidase, cytosolic						70.1402	79.9393	82.2152	78.8077	103.674	87.8739	88.7547	83.968	84.4217	3.43824	1510
ENSMUSG00000058569	Tmed9	transmembrane p24 trafficking protein 9						68.0256	81.7332	87.0885	89.6138	98.2378	80.6968	86.8154	83.0405	84.4064	3.05464	1511
ENSMUSG00000028447	Dctn3	dynactin 3						73.8449	77.9176	74.2996	78.9254	96.6433	98.4111	87.2056	87.5195	84.3459	3.40485	1512
ENSMUSG00000031783	Polr2c	polymerase (RNA) II (DNA directed) polypeptide C						71.6802	74.3231	81.1664	76.8012	106.024	88.0707	90.0654	86.1843	84.2895	3.89093	1513
ENSMUSG00000039910	Cited2	Cbp/p300-interacting transactivator, with Glu/Asp-rich carboxy-terminal domain, 2						68.1887	76.0397	85.9509	87.9115	92.951	82.4029	92.6603	87.8668	84.2465	3.00181	1514
ENSMUSG00000037710	Cisd1	CDGSH iron sulfur domain 1						79.1776	81.882	79.6448	78.0003	95.617	86.3272	88.1708	84.9183	84.2172	2.07424	1515
ENSMUSG00000026878	Rab14	RAB14, member RAS oncogene family						73.4947	81.7844	82.99	86.1724	96.4872	78.0851	85.1698	89.4491	84.2041	2.47362	1516
ENSMUSG00000022257	Laptm4b	lysosomal-associated protein transmembrane 4B						67.3125	74.7809	81.6055	87.4556	94.4834	83.3507	94.3255	89.9102	84.153	3.36161	1517
ENSMUSG00000015647	Lama5	laminin, alpha 5						72.2303	74.2864	91.0863	106.072	112.528	65.5947	81.0639	70.2795	84.1428	6.15228	1518
ENSMUSG00000091478	Gm10039	predicted pseudogene 10039						60.4897	86.5793	90.1028	98.9777	101.338	74.0793	78.3023	83.2483	84.1397	4.72999	1519
ENSMUSG00000025353	Ormdl2	ORM1-like 2 (S. cerevisiae)						67.44	81.2719	85.4739	76.8924	90.8738	91.9236	92.4557	86.6272	84.1198	3.0551	1520
ENSMUSG00000038633	Degs1	delta(4)-desaturase, sphingolipid 1						71.7898	75.9696	82.1416	89.8232	83.9458	84.1323	85.1373	99.8023	84.0927	2.99374	1521
ENSMUSG00000004070	Hmox2	heme oxygenase 2						77.3949	80.8899	75.9616	83.342	86.7847	87.4094	87.9452	92.508	84.0295	2.00745	1522
ENSMUSG00000029840	Mtpn	myotrophin						73.7778	77.3494	84.2668	81.6083	75.5462	86.3305	92.9422	99.6417	83.9329	3.15097	1523
ENSMUSG00000018559	Ctdnep1	CTD nuclear envelope phosphatase 1						85.6929	80.7161	84.2465	89.1913	83.1143	78.1594	88.4394	81.6994	83.9074	1.33958	1524
ENSMUSG00000027131	Emc4	ER membrane protein complex subunit 4						68.867	75.9553	83.1758	76.0489	95.577	89.9859	92.5009	88.3062	83.8021	3.32195	1525
ENSMUSG00000020649	Rrm2	ribonucleotide reductase M2						77.2988	77.7767	85.0781	91.2449	77.0867	80.8751	85.1297	95.5769	83.7584	2.42634	1526
ENSMUSG00000024856	Cdk2ap2	CDK2-associated protein 2						75.9664	81.1715	80.7299	87.9001	91.3328	86.5059	84.8148	81.6361	83.7572	1.71273	1527
ENSMUSG00000025374	Nabp2	nucleic acid binding protein 2						75.5251	78.678	78.4827	83.6729	90.4585	87.2722	89.9173	86.0006	83.7509	1.98941	1528
ENSMUSG00000031820	Babam1	BRISC and BRCA1 A complex member 1						65.3362	80.1173	83.2579	82.2756	105.008	88.229	86.1044	79.5272	83.732	3.89604	1529
ENSMUSG00000040354	Mars	methionine-tRNA synthetase						64.4252	78.6556	83.4111	87.8613	101.397	76.1599	93.3966	83.9056	83.6516	3.96067	1530
ENSMUSG00000035202	Lars2	leucyl-tRNA synthetase, mitochondrial						69.2217	74.8276	82.5535	100.917	91.6972	70.8193	94.0146	85.1313	83.6478	4.06283	1531
ENSMUSG00000003528	Slc25a1	solute carrier family 25 (mitochondrial carrier, citrate transporter), member 1			Solute carriers			80.4819	79.6328	81.8297	81.8804	90.3596	85.871	86.1181	82.9183	83.6365	1.26207	1532
ENSMUSG00000057388	Mrpl18	mitochondrial ribosomal protein L18						79.7603	78.3211	85.2945	78.6737	88.5701	83.5451	89.4165	84.2635	83.4806	1.51548	1533
ENSMUSG00000029364	Wsb2	WD repeat and SOCS box-containing 2						79.3115	76.2883	82.9833	85.2678	92.0701	85.2904	88.0311	78.3029	83.4432	1.87612	1534
ENSMUSG00000024436	Mrps18b	mitochondrial ribosomal protein S18B						75.7144	77.3728	75.3817	75.1605	92.375	88.6733	91.9013	90.71	83.4111	2.87118	1535
ENSMUSG00000040331	Nsmce4a	NSE4 homolog A, SMC5-SMC6 complex component						70.7729	72.6453	80.726	77.6349	89.2092	92.4853	90.2521	93.3371	83.3829	3.21125	1536
ENSMUSG00000021850	ccdc198	coiled-coil domain containing 198						98.8313	80.8545	84.2122	80.6532	73.2456	84.7999	76.6731	86.7344	83.2505	2.71921	1537
ENSMUSG00000000399	Ndufa9	NADH:ubiquinone oxidoreductase subunit A9						73.7384	74.9338	78.6443	75.4894	90.7656	88.8917	91.8775	91.57	83.2388	2.90638	1538
ENSMUSG00000031697	Orc6	origin recognition complex, subunit 6						78.8444	74.2696	78.7755	77.3857	84.3688	87.9906	89.8539	94.3942	83.2353	2.48566	1539
ENSMUSG00000067017	Gm3608	predicted gene 3608						73.6454	76.7335	80.7893	80.3825	84.0211	83.935	91.3073	94.702	83.1895	2.48601	1540
ENSMUSG00000070697	Utp3	UTP3 small subunit processome component						72.3052	80.2279	78.9638	82.262	88.3483	83.7663	88.7601	89.8514	83.0606	2.10519	1541
ENSMUSG00000072694	1500011B03Rik	RIKEN cDNA 1500011B03 gene						85.3555	79.8095	80.4593	80.369	84.1203	92.6229	82.8915	78.7549	83.0479	1.58664	1542
ENSMUSG00000038539	Atf5	activating transcription factor 5	TF_bZIP					65.3448	77.7872	83.4217	93.6102	95.8603	73.8648	92.4621	81.8975	83.0311	3.75883	1543
ENSMUSG00000032803	Cdv3	carnitine deficiency-associated gene expressed in ventricle 3						72.9372	82.356	84.9336	90.4511	74.6881	77.5791	94.3578	86.4461	82.9686	2.67352	1544
ENSMUSG00000021361	Tmem14c	transmembrane protein 14C						70.7668	76.5641	83.2198	79.7086	85.9188	89.0077	85.1131	92.8835	82.8978	2.4951	1545
ENSMUSG00000029552	Tes	testis derived transcript						71.4969	85.3201	84.2823	82.8708	87.8552	79.6084	85.6919	85.7104	82.8545	1.83646	1546
ENSMUSG00000027671	Actl6a	actin-like 6A						71.793	74.352	85.213	80.4622	86.3502	90.4076	85.3074	88.4879	82.7967	2.3639	1547
ENSMUSG00000030884	Uqcrc2	ubiquinol cytochrome c reductase core protein 2						71.9841	78.4716	80.5377	78.0766	86.5997	87.6603	87.0845	91.7358	82.7688	2.31226	1548
ENSMUSG00000027881	Prpf38b	PRP38 pre-mRNA processing factor 38 (yeast) domain containing B						73.3117	78.0782	84.362	89.4305	82.7761	75.8196	84.8532	92.8591	82.6863	2.36323	1549
ENSMUSG00000056770	Setd3	SET domain containing 3						69.3356	80.1733	87.4664	84.0397	84.7545	85.5834	85.3513	84.6826	82.6733	2.03976	1550
ENSMUSG00000011884	Gltp	glycolipid transfer protein						79.4132	82.8771	79.7711	84.6671	85.3468	84.4647	84.2515	80.3498	82.6427	0.858845	1551
ENSMUSG00000022710	Usp7	ubiquitin specific peptidase 7						74.2996	74.2128	90.2456	92.5821	87.2595	77.9215	84.6027	79.9213	82.6306	2.50755	1552
ENSMUSG00000040725	Hnrnpul1	heterogeneous nuclear ribonucleoprotein U-like 1						75.6082	80.398	85.814	88.3592	82.3774	77.1407	88.6137	82.3435	82.5818	1.70772	1553
ENSMUSG00000017843	Ppp2r5c	protein phosphatase 2, regulatory subunit B', gamma						75.073	81.2113	81.3943	82.2601	78.8958	89.3041	85.3933	86.655	82.5234	1.59809	1554
ENSMUSG00000029513	Prkab1	protein kinase, AMP-activated, beta 1 non-catalytic subunit		Unclassified				70.7549	77.2109	83.097	88.0913	87.2532	84.5806	90.2547	78.9062	82.5186	2.30493	1555
ENSMUSG00000006736	Tspan31	tetraspanin 31						68.461	71.4056	81.3734	84.0207	90.4374	83.3411	91.5122	88.8548	82.4258	3.01493	1556
ENSMUSG00000024571	Gm16286	predicted gene 16286						72.6229	79.8786	82.9348	84.3832	84.8806	80.7075	91.3179	82.0455	82.3464	1.86518	1557
ENSMUSG00000015087	Rabl6	RAB, member RAS oncogene family-like 6						66.3373	76.6213	84.2335	83.7418	96.4198	81.05	89.7024	80.3109	82.3021	3.14119	1558
ENSMUSG00000028759	Hp1bp3	heterochromatin protein 1, binding protein 3						71.4666	82.513	78.0815	92.9725	86.7499	72.8484	87.4854	85.9135	82.2539	2.66648	1559
ENSMUSG00000021039	Snw1	SNW domain containing 1						71.0846	76.9799	76.833	77.4171	84.1435	87.9578	92.7385	90.7719	82.2408	2.75141	1560
ENSMUSG00000057561	Eif1a	eukaryotic translation initiation factor 1A						73.0739	78.1699	84.3779	86.9804	67.9977	82.1598	86.0481	98.3416	82.1437	3.2846	1561
ENSMUSG00000042650	Alkbh5	alkB homolog 5, RNA demethylase						78.9406	83.1922	86.873	82.2485	74.3074	78.2017	90.5231	82.6856	82.1215	1.79875	1562
ENSMUSG00000037411	Serpine1	serine (or cysteine) peptidase inhibitor, clade E, member 1						66.3634	77.2068	69.8771	93.8784	111.522	75.7109	86.6148	75.7545	82.116	5.22159	1563
ENSMUSG00000048087	Gm4737	predicted gene 4737						77.3124	79.0083	76.4788	84.0493	92.4259	83.3867	85.5337	78.3749	82.0712	1.89838	1564
ENSMUSG00000110631	Gm42047	predicted gene, 42047						63.0492	75.1617	86.2873	102.315	89.1734	70.8726	76.8983	92.5082	82.0332	4.52908	1565
ENSMUSG00000042354	Gnl3	guanine nucleotide binding protein-like 3 (nucleolar)						71.9781	69.0659	72.2118	78.1572	91.8418	85.5626	97.4887	89.4861	81.974	3.74117	1566
ENSMUSG00000025817	Nudt5	nudix (nucleoside diphosphate linked moiety X)-type motif 5						67.9022	74.998	75.1931	79.8958	93.4848	91.6634	82.9126	89.6026	81.9565	3.225	1567
ENSMUSG00000027091	Zc3h15	zinc finger CCCH-type containing 15						73.8086	76.3671	83.8922	78.7683	81.4112	80.384	89.0365	90.8068	81.8093	2.08135	1568
ENSMUSG00000030750	Nsmce1	NSE1 homolog, SMC5-SMC6 complex component						71.931	76.8012	74.3497	72.8127	98.8892	86.8147	90.551	82.181	81.7913	3.41367	1569
ENSMUSG00000010608	Rbm25	RNA binding motif protein 25						84.023	75.2481	82.8523	95.0615	70.1147	72.6925	83.3206	88.5161	81.4786	2.96085	1570
ENSMUSG00000039640	Mrpl12	mitochondrial ribosomal protein L12						73.509	85.3225	80.1626	84.0869	91.3673	80.1291	80.2753	76.769	81.4527	1.93675	1571
ENSMUSG00000022553	Maf1	MAF1 homolog, negative regulator of RNA polymerase III						70.8958	80.305	73.218	83.5112	94.378	84.0593	82.0547	82.8257	81.406	2.53863	1572
ENSMUSG00000024513	Mbd2	methyl-CpG binding domain protein 2	MBD					65.569	75.2151	76.056	89.2662	96.0193	85.2913	84.2323	79.4606	81.3887	3.32726	1573
ENSMUSG00000025035	Arl3	ADP-ribosylation factor-like 3						68.8461	73.7263	77.1826	83.2588	91.1604	87.5889	85.6762	83.4292	81.3586	2.65143	1574
ENSMUSG00000022820	Ndufb4	NADH:ubiquinone oxidoreductase subunit B4						86.4075	81.5047	86.8264	86.1248	73.7098	79.3377	70.5574	85.2915	81.22	2.2067	1575
ENSMUSG00000032336	Nptn	neuroplastin						69.8191	79.1536	72.9	92.6387	98.8796	77.2768	77.7546	81.3108	81.2167	3.46742	1576
ENSMUSG00000032116	Stt3a	STT3, subunit of the oligosaccharyltransferase complex, homolog A (S. cerevisiae)						68.1309	83.602	84.2097	98.0167	90.057	79.9903	73.7387	71.696	81.1801	3.5212	1577
ENSMUSG00000021701	Plk2	polo like kinase 2		Unclassified				61.7615	72.9864	74.9989	78.2098	94.902	87.6609	87.9746	90.8135	81.1634	3.91998	1578
ENSMUSG00000026457	Adipor1	adiponectin receptor 1						75.934	79.6851	84.1861	82.4163	83.3457	81.6631	82.1037	79.961	81.1619	0.92177	1579
ENSMUSG00000042626	Shc1	src homology 2 domain-containing transforming protein C1						76.0917	76.4105	82.3133	84.3578	77.9523	77.4713	85.0585	89.2215	81.1096	1.7106	1580
ENSMUSG00000057406	Nsd2	nuclear receptor binding SET domain protein 2						70.5157	81.8466	93.1121	101.436	71.8229	67.7315	78.8874	82.5222	80.9842	4.10141	1581
ENSMUSG00000018501	Ncor1	nuclear receptor co-repressor 1	MYB					74.1251	85.1088	76.0627	105.501	74.0738	66.4437	85.2474	80.2447	80.8508	4.15565	1582
ENSMUSG00000018042	Cyb5r3	cytochrome b5 reductase 3						70.7889	81.0568	80.6286	83.9425	83.3713	81.5976	81.0632	84.1732	80.8278	1.51707	1583
ENSMUSG00000022200	Golph3	golgi phosphoprotein 3						71.7189	77.4368	82.9928	84.885	76.6581	78.4117	89.5811	84.2671	80.744	2.01439	1584
ENSMUSG00000079478	Sssca1	Sjogren syndrome/scleroderma autoantigen 1						74.5434	78.0944	71.0324	81.0881	101.013	87.9069	76.214	75.3546	80.6558	3.41095	1585
ENSMUSG00000020745	Pafah1b1	platelet-activating factor acetylhydrolase, isoform 1b, subunit 1						67.0448	73.7007	79.6275	76.1197	73.7244	82.6243	92.4472	99.7455	80.6293	3.80468	1586
ENSMUSG00000036275	9530068E07Rik	RIKEN cDNA 9530068E07 gene						64.9666	76.1844	81.0644	89.6009	89.2836	78.561	81.2831	83.4363	80.5475	2.78126	1587
ENSMUSG00000031328	Flna	filamin, alpha						67.7914	75.4819	78.7675	93.8911	89.125	75.6294	82.4287	81.171	80.5358	2.901	1588
ENSMUSG00000025283	Sat1	spermidine/spermine N1-acetyl transferase 1						74.2389	72.8306	80.5962	77.486	78.7391	80.9749	85.6212	92.8408	80.416	2.27135	1589
ENSMUSG00000023353	Agap3	ArfGAP with GTPase domain, ankyrin repeat and PH domain 3						67.916	79.1773	75.8428	90.5262	90.3234	77.0288	83.6688	78.6873	80.3963	2.6863	1590
ENSMUSG00000020869	Lrrc59	leucine rich repeat containing 59						69.5921	81.3301	82.2253	86.0758	82.444	79.2772	82.0676	79.7339	80.3433	1.70011	1591
ENSMUSG00000001763	Tspan33	tetraspanin 33						76.4104	74.9877	86.5976	86.2539	94.1713	73.1175	78.2578	71.7312	80.1909	2.80293	1592
ENSMUSG00000037643	Prkci	protein kinase C, iota		AGC family kinases				76.3171	70.4223	83.5364	93.0568	81.854	72.2899	82.7628	80.977	80.152	2.53394	1593
ENSMUSG00000038943	Prc1	protein regulator of cytokinesis 1						68.9927	75.0703	78.475	84.7816	84.0073	79.5555	81.0082	89.1743	80.1331	2.2037	1594
ENSMUSG00000085334	Gm12940	predicted gene 12940						75.4279	64.5331	83.6669	101.534	61.3931	67.2224	88.2005	99.0295	80.1259	5.47071	1595
ENSMUSG00000004032	Gstm5	glutathione S-transferase, mu 5						77.012	72.9605	80.1642	76.003	86.7582	82.7378	81.2501	84.0513	80.1171	1.61201	1596
ENSMUSG00000071646	Mta2	metastasis-associated gene family, member 2	zf-GATA					65.8957	77.7739	84.9268	89.8448	82.451	76.0553	83.2286	79.421	79.9496	2.52625	1597
ENSMUSG00000027108	Ola1	Obg-like ATPase 1						66.1103	75.1617	73.2366	74.2156	78.1899	90.6615	85.8758	95.9361	79.9234	3.53785	1598
ENSMUSG00000048277	Syngr2	synaptogyrin 2						67.0702	73.1383	82.6693	85.4574	87.0737	78.1202	83.8375	81.9936	79.92	2.4031	1599
ENSMUSG00000034667	Xpot	exportin, tRNA (nuclear export receptor for tRNAs)						61.4633	71.9632	83.8994	91.0357	81.2145	73.8173	94.8827	80.8373	79.8892	3.79612	1600
ENSMUSG00000026796	Fam129b	family with sequence similarity 129, member B						69.0795	77.704	78.5738	87.9063	89.1801	75.0105	83.4128	77.7971	79.833	2.3699	1601
ENSMUSG00000037822	Smim14	small integral membrane protein 14						70.5034	76.8847	77.5641	75.5123	87.8936	84.7966	81.8887	82.8996	79.7429	1.99431	1602
ENSMUSG00000028568	Btf3l4	basic transcription factor 3-like 4						78.3057	77.366	79.7274	73.745	74.7795	85.5115	81.5389	86.7924	79.7208	1.66111	1603
ENSMUSG00000040888	Gfer	growth factor, augmenter of liver regeneration						76.0725	82.8081	83.8632	75.0505	89.2777	73.8611	73.6266	82.3799	79.6175	2.03369	1604
ENSMUSG00000025451	Paip1	polyadenylate binding protein-interacting protein 1						70.5912	69.4025	79.1288	74.2644	88.0404	77.0099	89.0168	89.1635	79.5772	2.90295	1605
ENSMUSG00000022474	Pmm1	phosphomannomutase 1						73.2779	80.9314	75.8856	76.322	91.9149	78.7945	82.4132	76.9871	79.5658	2.04119	1606
ENSMUSG00000015671	Psma2	proteasome (prosome, macropain) subunit, alpha type 2						74.3517	76.2726	78.3478	73.9818	87.7327	79.676	81.677	83.51	79.4437	1.67599	1607
ENSMUSG00000002804	Nudt14	nudix (nucleoside diphosphate linked moiety X)-type motif 14						74.6998	73.2409	79.242	73.1573	88.4056	86.6115	77.7409	82.2211	79.4149	2.0824	1608
ENSMUSG00000005575	Ube2m	ubiquitin-conjugating enzyme E2M						69.4479	74.5563	79.9117	83.547	88.3971	83.6569	75.8735	79.9014	79.4115	2.12015	1609
ENSMUSG00000028603	Scp2	sterol carrier protein 2, liver						68.841	80.4309	80.1553	81.0382	86.7657	84.8935	76.9346	76.0271	79.3858	1.97165	1610
ENSMUSG00000024927	Rela	v-rel reticuloendotheliosis viral oncogene homolog A (avian)	RHD					66.9227	81.0203	74.4713	95.1907	82.3019	76.4101	82.1545	76.255	79.3408	2.88703	1611
ENSMUSG00000007458	M6pr	mannose-6-phosphate receptor, cation dependent						66.3978	77.0529	78.5622	83.6431	82.0696	79.9001	82.4253	84.4065	79.3072	2.04763	1612
ENSMUSG00000034826	Nup54	nucleoporin 54						68.8103	72.5931	80.4118	75.75	85.6002	78.7339	85.7388	86.4731	79.2639	2.32136	1613
ENSMUSG00000045160	Bola3	bolA-like 3 (E. coli)						81.8393	84.5429	74.994	76.1305	67.0183	84.0738	92.4398	73.0137	79.2565	2.8294	1614
ENSMUSG00000004788	Eif2b2	eukaryotic translation initiation factor 2B, subunit 2 beta						54.45	84.7025	79.9799	86.8957	103.68	74.397	76.8157	71.8183	79.0923	4.97327	1615
ENSMUSG00000042605	Atxn2	ataxin 2						67.5358	69.3239	88.7584	89.1183	74.2309	77.6505	79.5804	85.8341	79.004	2.97089	1616
ENSMUSG00000027706	Sec62	SEC62 homolog (S. cerevisiae)						70.5294	72.5209	77.1795	79.3806	81.1155	75.4225	84.4268	91.1386	78.9642	2.35754	1617
ENSMUSG00000019868	Vta1	vesicle (multivesicular body) trafficking 1						77.3671	77.2997	72.7397	68.8765	85.1376	87.7294	83.3778	79.0363	78.9455	2.23707	1618
ENSMUSG00000021276	Cinp	cyclin-dependent kinase 2 interacting protein						69.2581	70.614	80.5157	81.6275	90.9359	79.6104	78.9958	79.8489	78.9258	2.38277	1619
ENSMUSG00000055553	Kxd1	KxDL motif containing 1						77.9885	77.9673	73.2216	80.7019	87.6342	80.9016	79.8869	73.0869	78.9236	1.64884	1620
ENSMUSG00000036678	Aaas	achalasia, adrenocortical insufficiency, alacrimia						63.6104	76.9001	75.0305	88.335	89.7733	75.3646	82.0498	79.9942	78.8822	2.93868	1621
ENSMUSG00000020018	Snrpf	small nuclear ribonucleoprotein polypeptide F						75.6929	79.745	76.1617	76.4823	75.0433	86.8436	85.6966	75.236	78.8627	1.70044	1622
ENSMUSG00000000303	Cdh1	cadherin 1						74.0187	77.1747	83.5454	88.5872	76.1529	72.3971	80.3109	78.6203	78.8509	1.86178	1623
ENSMUSG00000006740	Kif5b	kinesin family member 5B						74.6538	76.342	83.4225	82.7168	63.9998	74.6472	84.126	90.8497	78.8447	2.89637	1624
ENSMUSG00000037720	Tmem33	transmembrane protein 33						65.6981	72.6538	79.5083	73.4606	86.5978	78.7556	85.0881	88.9119	78.8343	2.80636	1625
ENSMUSG00000023079	Gtf2ird1	general transcription factor II I repeat domain-containing 1	GTF2I					71.6234	74.3302	70.8573	93.0839	80.9596	67.1173	90.0632	82.508	78.8179	3.32833	1626
ENSMUSG00000035960	Apex1	apurinic/apyrimidinic endonuclease 1						67.5324	70.7455	75.3888	73.4613	86.4435	81.2856	87.1975	88.3872	78.8052	2.86295	1627
ENSMUSG00000031557	Plekha2	pleckstrin homology domain-containing, family A (phosphoinositide binding specific) member 2						72.2832	76.0356	77.3069	76.2922	81.9393	78.4147	84.7873	82.7668	78.7282	1.46491	1628
ENSMUSG00000033434	Gtpbp6	GTP binding protein 6 (putative)						60.9342	70.1416	81.4094	83.212	99.0939	77.1812	81.5764	75.98	78.6911	3.89701	1629
ENSMUSG00000020541	Tom1l1	target of myb1-like 1 (chicken)						67.8005	67.1815	65.8555	79.0463	84.1817	82.9559	92.397	89.6969	78.6394	3.71592	1630
ENSMUSG00000026970	Rbms1	RNA binding motif, single stranded interacting protein 1						73.2803	80.672	75.7361	83.963	77.4498	74.0437	78.6586	84.9572	78.5951	1.53562	1631
ENSMUSG00000022378	Fam49b	family with sequence similarity 49, member B						73.5074	71.1176	72.8693	72.1834	74.3157	86.515	88.4685	88.4118	78.4236	2.77214	1632
ENSMUSG00000042745	Id1	inhibitor of DNA binding 1	bHLH					72.5893	75.0847	72.5915	66.0312	78.995	86.2892	93.0857	82.5407	78.4009	3.06737	1633
ENSMUSG00000062683	Atp5g2	ATP synthase, H+ transporting, mitochondrial F0 complex, subunit C2 (subunit 9)						75.307	82.9201	80.288	75.7685	64.4182	79.0034	83.5892	85.8289	78.3904	2.38469	1634
ENSMUSG00000071454	Dtnb	dystrobrevin, beta						73.1089	76.1743	74.8552	85.4328	88.7465	72.3899	77.0629	78.9672	78.3422	2.07118	1635
ENSMUSG00000038880	Mrps34	mitochondrial ribosomal protein S34						66.989	72.2066	73.9786	76.1764	88.2694	90.6295	82.1963	76.1795	78.3282	2.86397	1636
ENSMUSG00000039148	Sart1	squamous cell carcinoma antigen recognized by T cells 1						70.056	74.7131	82.9012	82.1584	97.0593	69.4308	79.7887	70.3892	78.3121	3.30653	1637
ENSMUSG00000007338	Mrpl49	mitochondrial ribosomal protein L49						70.4311	72.1919	79.3256	76.6971	78.2855	83.5695	84.4274	81.1433	78.2589	1.77398	1638
ENSMUSG00000022174	Dad1	defender against cell death 1						67.5311	74.3325	73.3849	79.8831	94.563	80.1618	79.676	75.9775	78.1887	2.78232	1639
ENSMUSG00000003923	Tfam	transcription factor A, mitochondrial	HMG					63.157	67.1824	80.5141	69.5118	95.1556	85.0994	74.729	89.9531	78.1628	4.0395	1640
ENSMUSG00000037070	Rbmxl1	RNA binding motif protein, X-linked like-1						63.7763	71.9306	70.8673	78.8344	79.6584	84.7522	87.3887	87.2046	78.0515	3.02347	1641
ENSMUSG00000033732	Sf3b3	splicing factor 3b, subunit 3						64.3757	75.1548	78.8358	84.3272	80.5247	73.2949	85.8862	81.747	78.0183	2.4611	1642
ENSMUSG00000031838	Ifi30	interferon gamma inducible protein 30						67.6961	78.3212	75.2485	84.1823	94.2293	75.9624	73.1679	75.1361	77.993	2.83838	1643
ENSMUSG00000024646	Cyb5a	cytochrome b5 type A (microsomal)						78.0424	73.8342	74.8166	70.2806	78.1211	85.3991	82.8818	80.5447	77.9901	1.7533	1644
ENSMUSG00000000902	Smarcb1	SWI/SNF related, matrix associated, actin dependent regulator of chromatin, subfamily b, member 1						64.333	73.3483	70.8836	77.2059	87.5539	79.6456	83.3261	87.2015	77.9373	2.88681	1645
ENSMUSG00000028809	Srrm1	serine/arginine repetitive matrix 1						76.7237	75.4178	79.2877	85.227	71.333	71.1032	76.5179	87.6464	77.9071	2.11026	1646
ENSMUSG00000028954	Nub1	negative regulator of ubiquitin-like proteins 1						66.3676	74.3468	75.9395	82.923	82.6817	76.9129	81.7714	81.9872	77.8663	2.02757	1647
ENSMUSG00000026553	Copa	coatomer protein complex subunit alpha						68.3053	71.7728	81.1315	85.5715	78.7222	72.4703	81.3531	83.0927	77.8025	2.18708	1648
ENSMUSG00000066568	Lsm14a	LSM14A mRNA processing body assembly factor						65.9395	75.4653	80.0547	81.0806	82.2151	70.4295	81.8691	84.8637	77.7397	2.32306	1649
ENSMUSG00000001909	Trmt1	tRNA methyltransferase 1						70.046	72.6657	84.4651	73.7722	85.7966	80.2018	84.1835	70.4663	77.6997	2.35773	1650
ENSMUSG00000031536	Polb	polymerase (DNA directed), beta						76.1658	74.4024	74.3379	74.6047	72.9283	81.5163	82.3491	85.0344	77.6674	1.61933	1651
ENSMUSG00000029686	Cul1	cullin 1						65.3219	68.4344	78.1363	78.3021	84.4009	78.9747	78.9174	88.7522	77.655	2.70504	1652
ENSMUSG00000050071	Bex1	brain expressed X-linked 1						66.5041	77.1194	75.7571	79.0658	86.2488	72.9226	84.2948	78.8175	77.5913	2.20339	1653
ENSMUSG00000072825	Cep170b	centrosomal protein 170B						64.6574	76.5727	80.8495	95.5662	71.9762	70.9631	80.5678	79.2673	77.5525	3.24355	1654
ENSMUSG00000020530	Ggnbp2	gametogenetin binding protein 2						69.6468	66.8361	69.9909	82.6843	78.6282	76.8976	87.6485	87.8918	77.528	2.90094	1655
ENSMUSG00000007029	Vars	valyl-tRNA synthetase						66.356	75.8831	77.6769	88.1072	89.6782	71.81	69.8435	80.6487	77.5005	2.95371	1656
ENSMUSG00000022024	Sugt1	SGT1, suppressor of G2 allele of SKP1 (S. cerevisiae)						66.0284	75.9133	84.4288	67.5064	81.9495	80.4818	82.5094	80.9257	77.4679	2.49108	1657
ENSMUSG00000046707	Csnk2a2	casein kinase 2, alpha prime polypeptide		Unclassified				65.7114	78.2706	76.7058	77.638	68.8434	81.0241	86.6821	84.5523	77.4285	2.54101	1658
ENSMUSG00000008136	Fhl2	four and a half LIM domains 2						62.2639	68.2406	70.154	68.6926	95.9613	82.3058	85.8236	85.8862	77.416	4.12501	1659
ENSMUSG00000021144	Mta1	metastasis associated 1	zf-GATA					73.1179	76.6772	81.9238	80.166	85.2241	76.0753	76.0123	70.0437	77.405	1.72164	1660
ENSMUSG00000065037	Rn7sk	RNA, 7SK, nuclear						68.5043	81.3219	73.6185	89.3419	81.7558	71.9045	72.4691	80.0913	77.3759	2.43541	1661
ENSMUSG00000063172	Hspb11	heat shock protein family B (small), member 11						82.0072	74.716	80.1168	66.9997	64.1544	85.933	74.6044	90.3836	77.3644	3.18651	1662
ENSMUSG00000020514	Mrpl22	mitochondrial ribosomal protein L22						76.5022	66.9063	75.912	76.8009	82.6849	85.0875	80.6073	74.2761	77.3472	1.98453	1663
ENSMUSG00000039737	Prkrip1	Prkr interacting protein 1 (IL11 inducible)						66.1793	72.1951	73.232	75.4373	91.8611	80.8345	77.7113	81.2881	77.3424	2.70689	1664
ENSMUSG00000015176	Nolc1	nucleolar and coiled-body phosphoprotein 1						63.9918	71.221	72.6384	84.6871	81.3875	76.8555	84.3083	82.7872	77.2346	2.62698	1665
ENSMUSG00000029528	Pxn	paxillin						69.5273	77.1121	82.0292	86.6969	80.649	68.4208	77.4887	75.4383	77.1703	2.17346	1666
ENSMUSG00000020775	Mrpl38	mitochondrial ribosomal protein L38						67.3565	66.6	81.9884	80.3975	82.6616	80.9269	81.5018	75.2607	77.0867	2.34631	1667
ENSMUSG00000053929	Cyhr1	cysteine and histidine rich 1						66.3658	76.024	80.1232	85.3478	85.0944	73.0173	78.2766	72.2325	77.0602	2.31142	1668
ENSMUSG00000029038	Ssu72	Ssu72 RNA polymerase II CTD phosphatase homolog (yeast)						67.4629	75.0201	73.0774	70.9403	87.3198	85.4159	79.5066	76.8615	76.9506	2.4297	1669
ENSMUSG00000027953	Slc50a1	solute carrier family 50 (sugar transporter), member 1			Solute carriers			65.583	68.5702	72.4111	80.0726	94.1245	80.07	80.728	74.0291	76.9486	3.15461	1670
ENSMUSG00000028757	Ddost	dolichyl-di-phosphooligosaccharide-protein glycotransferase						66.5118	73.3412	74.7803	81.8414	92.6508	74.2827	76.052	76.0348	76.9369	2.6922	1671
ENSMUSG00000028676	Srsf10	serine/arginine-rich splicing factor 10						68.6801	76.6735	77.4853	80.6584	74.0336	69.0979	79.7129	88.761	76.8878	2.31366	1672
ENSMUSG00000078713	Tomm5	translocase of outer mitochondrial membrane 5						72.7952	72.3926	74.4194	73.0749	82.0292	83.2234	83.1729	73.1863	76.7867	1.77926	1673
ENSMUSG00000018848	Rars	arginyl-tRNA synthetase						64.4651	69.3131	73.8447	78.8022	79.4079	78.3225	83.9293	85.3844	76.6837	2.51594	1674
ENSMUSG00000002565	Scin	scinderin						60.7148	68.7669	75.487	80.1393	83.8747	76.7736	82.482	85.0224	76.6576	2.94571	1675
ENSMUSG00000051989	Smim11	small integral membrane protein 11						77.6381	79.9384	82.5022	73.7601	71.9466	79.7041	66.3566	81.0627	76.6136	1.94227	1676
ENSMUSG00000041360	Pum3	pumilio RNA-binding family member 3						62.7134	74.2392	81.6697	72.3488	86.3483	79.1638	67.8291	88.416	76.591	3.16323	1677
ENSMUSG00000038776	Ephx1	epoxide hydrolase 1, microsomal						67.4414	72.8309	72.9457	80.4567	87.1734	78.924	79.4285	73.3769	76.5722	2.16257	1678
ENSMUSG00000022706	Mrpl40	mitochondrial ribosomal protein L40						71.3369	73.8205	75.6276	67.1551	75.9624	78.6348	82.4647	87.5683	76.5713	2.25521	1679
ENSMUSG00000067851	Arfgef1	ADP-ribosylation factor guanine nucleotide-exchange factor 1(brefeldin A-inhibited)						68.7667	75.0378	80.7507	85.5885	68.4484	69.3521	80.6767	83.7456	76.5458	2.49449	1680
ENSMUSG00000020936	Nmt1	N-myristoyltransferase 1						68.3492	71.5877	66.6016	72.83	90.1589	83.3624	74.8035	84.196	76.4862	2.98142	1681
ENSMUSG00000010755	Cars	cysteinyl-tRNA synthetase						67.9379	70.5521	65.7799	81.2612	87.7456	73.676	86.2898	78.269	76.4389	2.92665	1682
ENSMUSG00000028452	Vcp	valosin containing protein						67.5133	74.0762	79.2414	82.8697	72.5193	73.6329	80.7185	80.8694	76.4301	1.8691	1683
ENSMUSG00000020184	Mdm2	transformed mouse 3T3 cell double minute 2						67.9935	72.9684	76.5651	77.2822	77.6717	72.6401	78.365	86.1675	76.2067	1.88021	1684
ENSMUSG00000036777	Anln	anillin, actin binding protein						68.4846	67.4978	72.7518	80.0176	81.7603	76.3941	77.4048	84.5022	76.1017	2.16702	1685
ENSMUSG00000038733	Wdr26	WD repeat domain 26						69.6688	69.84	82.8735	81.6502	75.8928	69.046	80.9293	77.9367	75.9797	2.04248	1686
ENSMUSG00000034459	Ifit1	interferon-induced protein with tetratricopeptide repeats 1						65.8891	71.5669	66.1426	76.8367	89.2351	77.7808	79.5432	80.8041	75.9748	2.78299	1687
ENSMUSG00000015652	Steap1	six transmembrane epithelial antigen of the prostate 1						61.0323	67.2846	79.4478	78.0138	81.7004	71.435	80.0704	88.4307	75.9269	3.1062	1688
ENSMUSG00000031995	St14	suppression of tumorigenicity 14 (colon carcinoma)						66.3622	72.4459	78.3848	87.9575	82.0553	68.1798	76.2745	74.5036	75.7705	2.5139	1689
ENSMUSG00000024962	Vegfb	vascular endothelial growth factor B						74.4954	76.7052	77.437	75.721	81.3473	73.5804	73.7312	72.9141	75.7415	0.977305	1690
ENSMUSG00000106864	Gtf3c2	general transcription factor IIIC, polypeptide 2, beta						61.3962	64.9341	79.4883	86.1712	81.9144	75.1108	77.3174	79.4798	75.7265	2.98916	1691
ENSMUSG00000025228	Actr1a	ARP1 actin-related protein 1A, centractin alpha						62.5415	74.0739	75.4338	79.9014	82.4	74.9338	78.5311	77.9003	75.7145	2.12067	1692
ENSMUSG00000028800	Hdac1	histone deacetylase 1						67.5349	72.271	76.291	75.0276	82.0956	75.7614	75.5758	81.1298	75.7109	1.63463	1693
ENSMUSG00000071796	6820431F20Rik	RIKEN cDNA 6820431F20 gene						65.6813	70.7962	74.7797	76.4196	74.3107	70.9765	84.1546	88.3004	75.6774	2.60587	1694
ENSMUSG00000023883	Phf10	PHD finger protein 10						68.6794	69.5914	71.9607	73.8114	73.7043	73.8963	86.4223	86.7717	75.6047	2.49595	1695
ENSMUSG00000036402	Gng12	guanine nucleotide binding protein (G protein), gamma 12						73.3187	65.321	75.2298	78.1139	71.9575	73.7725	83.5665	82.8541	75.5168	2.1127	1696
ENSMUSG00000003402	Prkcsh	protein kinase C substrate 80K-H						66.6512	73.1915	78.378	86.765	84.1486	69.7143	73.5057	71.6361	75.4988	2.48564	1697
ENSMUSG00000002778	Kdelr1	KDEL (Lys-Asp-Glu-Leu) endoplasmic reticulum protein retention receptor 1						69.3229	74.7188	73.3095	80.0478	77.5308	73.8239	81.5025	73.5788	75.4794	1.40724	1698
ENSMUSG00000001750	Tcirg1	T cell, immune regulator 1, ATPase, H+ transporting, lysosomal V0 protein A3						59.9437	70.5663	78.7297	86.6963	89.3933	72.1143	75.7621	70.616	75.4777	3.35552	1699
ENSMUSG00000082691	Dynlt1-ps1	dynein light chain Tctex-type 1, pseuodogene 1						87.5281	92.3379	63.636	60.0586	60.9138	128.965	50.3661	59.8832	75.4611	9.21394	1700
ENSMUSG00000021127	Zfp36l1	zinc finger protein 36, C3H type-like 1						71.3753	73.7575	72.0971	80.3759	70.4445	69.3405	83.2615	80.8858	75.1923	1.92442	1701
ENSMUSG00000030876	Mettl9	methyltransferase like 9						67.2346	75.9656	79.9292	68.2047	71.5741	78.5379	77.5208	82.2799	75.1558	1.95994	1702
ENSMUSG00000069049	Eif2s3y	eukaryotic translation initiation factor 2, subunit 3, structural gene Y-linked						65.8063	65.3672	72.3224	69.4056	74.4651	80.2966	85.4437	86.6914	74.9748	2.95767	1703
ENSMUSG00000025199	Chuk	conserved helix-loop-helix ubiquitous kinase		I kappa B kinases				66.1205	69.5337	78.0367	77.5247	74.1221	73.5669	81.0705	79.7602	74.9669	1.82565	1704
ENSMUSG00000043801	Oaz1-ps	ornithine decarboxylase antizyme 1, pseudogene						63.5292	63.0391	63.1891	74.5964	96.2146	84.269	85.8613	69.0235	74.9653	4.43998	1705
ENSMUSG00000015094	Npdc1	neural proliferation, differentiation and control 1						72.6434	73.2298	75.3464	74.8574	87.1679	73.4582	73.4514	69.5218	74.9595	1.84999	1706
ENSMUSG00000004069	Dnaja3	DnaJ heat shock protein family (Hsp40) member A3						61.5637	68.5052	70.3582	71.2333	80.9341	80.1674	86.7067	79.2224	74.8364	2.91249	1707
ENSMUSG00000022721	Trmt2a	TRM2 tRNA methyltransferase 2A						54.3326	69.7512	64.4833	74.8579	86.6315	80.1353	88.0946	80.1477	74.8043	4.06342	1708
ENSMUSG00000063870	Chd4	chromodomain helicase DNA binding protein 4						68.5984	77.5164	78.4379	83.769	67.8485	68.8264	77.5018	75.9081	74.8008	2.03562	1709
ENSMUSG00000030291	Med21	mediator complex subunit 21						79.1783	75.5398	69.707	61.9821	67.466	80.4878	80.3974	83.4739	74.779	2.68148	1710
ENSMUSG00000026309	Ilkap	integrin-linked kinase-associated serine/threonine phosphatase 2C						67.576	70.3406	71.602	76.2705	81.4595	74.4717	75.3162	81.1879	74.778	1.74226	1711
ENSMUSG00000029463	Fam216a	family with sequence similarity 216, member A						59.1243	72.584	72.9169	75.3894	81.8664	81.367	77.0857	77.6396	74.7467	2.53847	1712
ENSMUSG00000029148	Nrbp1	nuclear receptor binding protein 1						59.6998	66.7455	68.3328	74.6512	84.5338	82.1936	82.285	79.3742	74.727	3.16526	1713
ENSMUSG00000039163	Cmc1	COX assembly mitochondrial protein 1						82.72	78.2795	76.7755	68.4332	64.7494	77.3388	77.7411	71.1839	74.6527	2.10563	1714
ENSMUSG00000038615	Nfe2l1	nuclear factor, erythroid derived 2,-like 1	TF_bZIP					65.2928	68.9213	81.7678	93.2275	66.2407	69.8441	77.9625	73.7524	74.6261	3.33207	1715
ENSMUSG00000050552	Lamtor4	late endosomal/lysosomal adaptor, MAPK and MTOR activator 4						70.8057	76.776	74.3761	75.5245	85.1804	70.9139	70.6966	72.3708	74.5805	1.72052	1716
ENSMUSG00000026426	Arl8a	ADP-ribosylation factor-like 8A						65.0648	70.8637	72.5411	73.6601	89.7407	72.2827	77.1069	75.065	74.5406	2.50388	1717
ENSMUSG00000040158	Tax1bp3	Tax1 (human T cell leukemia virus type I) binding protein 3						69.0074	69.0748	74.6157	72.7556	77.9726	76.8364	76.3244	79.5964	74.5229	1.39816	1718
ENSMUSG00000046733	Gprc5a	G protein-coupled receptor, family C, group 5, member A					G protein-coupled receptors, Class C orphans	60.6559	74.0303	74.0064	82.4949	78.9231	69.3398	81.1851	75.3659	74.5002	2.49168	1719
ENSMUSG00000096215	Smim22	small integral membrane protein 22						66.6849	74.6859	61.3132	72.9601	77.1739	83.4357	88.0973	71.1539	74.4381	3.04848	1720
ENSMUSG00000006273	Atp6v1b2	ATPase, H+ transporting, lysosomal V1 subunit B2						63.6439	68.649	72.1649	72.7781	83.6122	76.179	79.0095	79.4628	74.4374	2.28071	1721
ENSMUSG00000027699	Ect2	ect2 oncogene						67.2507	70.0472	72.9032	77.4755	72.0373	75.9947	76.3631	83.4251	74.4371	1.76867	1722
ENSMUSG00000077222	Gm22270	predicted gene, 22270						62.5182	85.4618	71.0957	77.0873	83.982	77.8603	74.9499	61.8384	74.3492	3.11547	1723
ENSMUSG00000004789	Dlst	dihydrolipoamide S-succinyltransferase (E2 component of 2-oxo-glutarate complex)						61.32	72.9226	77.6136	80.2526	77.6974	68.953	83.3969	72.5665	74.3403	2.47369	1724
ENSMUSG00000068391	Chrac1	chromatin accessibility complex 1						66.3706	71.9231	72.1013	75.1008	81.2649	79.5676	71.8008	76.5547	74.3355	1.69862	1725
ENSMUSG00000008393	Carhsp1	calcium regulated heat stable protein 1	CSD					67.5512	72.4831	72.605	78.1297	78.5152	72.5993	76.4901	76.1748	74.3185	1.30491	1726
ENSMUSG00000067365	Tmem128	transmembrane protein 128						68.472	72.0131	71.6247	75.9577	73.7567	81.4173	74.1967	76.0694	74.1885	1.35681	1727
ENSMUSG00000026511	Srp9	signal recognition particle 9						68.4239	77.813	73.5573	67.6592	69.93	78.256	75.5682	81.9551	74.1453	1.82387	1728
ENSMUSG00000025417	Pip4k2c	phosphatidylinositol-5-phosphate 4-kinase, type II, gamma		Unclassified				64.6206	71.5892	73.9581	80.5662	78.5506	70.5377	79.5645	73.6803	74.1334	1.89228	1729
ENSMUSG00000003345	Csnk1g2	casein kinase 1, gamma 2		Unclassified				64.6981	73.4188	73.4256	84.3776	82.6583	72.0472	70.8273	71.3711	74.103	2.27784	1730
ENSMUSG00000030403	Vasp	vasodilator-stimulated phosphoprotein						65.1888	72.2634	73.3714	79.0847	74.522	75.9418	79.1347	73.2615	74.096	1.56857	1731
ENSMUSG00000022407	Adsl	adenylosuccinate lyase						63.3811	70.6053	71.9247	69.1847	90.2182	73.0767	79.7807	74.4675	74.0799	2.83236	1732
ENSMUSG00000026766	Mmadhc	methylmalonic aciduria (cobalamin deficiency) cblD type, with homocystinuria						63.1664	69.7664	70.1354	67.2452	75.9967	81.1451	83.0339	81.9738	74.0579	2.65941	1733
ENSMUSG00000090733	Rps27	ribosomal protein S27						177.525	117.292	36.6388	77.3837	41.1621	50.1162	50.4723	41.5284	74.0148	17.5538	1734
ENSMUSG00000029014	Dnajc2	DnaJ heat shock protein family (Hsp40) member C2	MYB					66.6736	69.7809	71.985	77.2158	69.7146	77.7617	75.6261	83.2991	74.0071	1.92498	1735
ENSMUSG00000104268	Gm37750	predicted gene, 37750						91.7368	84.1125	77.7696	88.1892	77.8192	54.5987	61.9185	55.1606	73.9132	5.21711	1736
ENSMUSG00000031770	Herpud1	homocysteine-inducible, endoplasmic reticulum stress-inducible, ubiquitin-like domain member 1						61.7977	71.5337	72.9734	77.8169	79.3076	70.4277	80.0708	77.0701	73.8747	2.14513	1737
ENSMUSG00000116875	Morf4l1-ps1	mortality factor 4 like 1, pseudogene 1						67.4612	76.3201	82.0345	78.8136	84.4513	57.2782	75.7596	68.4879	73.8258	3.15647	1738
ENSMUSG00000029201	Ugdh	UDP-glucose dehydrogenase						59.1204	69.648	69.9798	76.0917	77.566	74.3585	79.4884	84.2299	73.8103	2.69991	1739
ENSMUSG00000034993	Vat1	vesicle amine transport 1						64.2768	75.8911	72.4855	83.0604	76.6567	73.4206	72.7107	71.905	73.8009	1.86906	1740
ENSMUSG00000024826	Dpf2	D4, zinc and double PHD fingers family 2						64.9388	69.4421	70.834	78.9705	78.1729	69.6938	84.068	74.1554	73.7845	2.21433	1741
ENSMUSG00000024858	Grk2	G protein-coupled receptor kinase 2		AGC family kinases				71.0192	63.838	77.3455	76.9817	83.9612	77.5483	74.7982	64.6092	73.7627	2.43642	1742
ENSMUSG00000046223	Plaur	plasminogen activator, urokinase receptor						61.0501	66.5028	72.021	72.1372	94.8206	73.2472	77.7028	72.3697	73.7314	3.4876	1743
ENSMUSG00000062234	Gak	cyclin G associated kinase		Unclassified				64.9403	73.5615	75.8883	79.6681	72.3501	66.6475	80.3856	76.1331	73.6968	1.97906	1744
ENSMUSG00000002748	Baz1b	bromodomain adjacent to zinc finger domain, 1B						67.5502	72.8348	78.049	83.9069	69.574	65.6827	74.0261	77.508	73.6415	2.14453	1745
ENSMUSG00000111228	Gm48789	predicted gene, 48789						139.907	63.2555	56.16	45.1653	36.403	111.348	64.9036	71.8642	73.6259	12.3227	1746
ENSMUSG00000080364	Gm25777	predicted gene, 25777						71.396	56.2848	57.3634	81.2817	101.666	54.1145	124.387	42.3359	73.6037	9.77558	1747
ENSMUSG00000030890	Ilk	integrin linked kinase		Unclassified				63.1526	67.3119	68.3208	71.3028	84.5336	79.1347	76.9117	76.6272	73.4119	2.50664	1748
ENSMUSG00000009907	Vps4b	vacuolar protein sorting 4B						59.5591	67.2948	72.5558	77.4159	71.1231	75.5926	78.6346	84.5588	73.3418	2.69777	1749
ENSMUSG00000052566	Hook2	hook microtubule tethering protein 2						60.1424	64.5554	72.3254	78.3429	87.3933	68.5625	80.8195	74.1428	73.2855	3.14611	1750
ENSMUSG00000026104	Stat1	signal transducer and activator of transcription 1	STAT					68.4328	73.2946	67.1029	77.0212	81.7554	67.9083	78.6279	72.0294	73.2716	1.92029	1751
ENSMUSG00000004044	Cavin1	caveolae associated 1						65.1243	74.5807	75.8735	78.8104	68.9985	69.7878	77.3174	75.116	73.2011	1.66727	1752
ENSMUSG00000060261	Gtf2i	general transcription factor II I	GTF2I					59.4577	70.083	74.7685	80.201	71.8508	71.2109	81.2157	76.1291	73.1146	2.42232	1753
ENSMUSG00000027808	Serp1	stress-associated endoplasmic reticulum protein 1						64.9244	68.2296	73.9977	70.6899	66.6285	75.903	79.8746	83.8765	73.0155	2.34857	1754
ENSMUSG00000070003	Ssbp4	single stranded DNA binding protein 4						67.9814	73.2319	68.7172	84.4427	81.8109	68.9673	70.2017	68.6402	72.9992	2.29615	1755
ENSMUSG00000071659	Hnrnpul2	heterogeneous nuclear ribonucleoprotein U-like 2						66.1584	71.5365	77.5488	85.2829	73.1894	65.5009	72.7127	72.0131	72.9928	2.22742	1756
ENSMUSG00000028108	Ecm1	extracellular matrix protein 1						67.5673	79.0453	82.4609	81.0502	66.5835	69.2643	70.707	66.7178	72.9245	2.39112	1757
ENSMUSG00000025871	4833439L19Rik	RIKEN cDNA 4833439L19 gene						68.8855	67.011	75.0724	71.5123	76.6231	73.8129	81.2951	69.1494	72.9202	1.67267	1758
ENSMUSG00000074513	Arfip1	ADP-ribosylation factor interacting protein 1						63.4839	69.5	74.3863	75.5906	70.3405	70.7534	77.1826	81.5974	72.8543	1.9585	1759
ENSMUSG00000001576	Ergic1	endoplasmic reticulum-golgi intermediate compartment (ERGIC) 1						60.0468	67.724	70.6356	81.7528	79.9915	72.7009	75.3567	74.3797	72.8235	2.4422	1760
ENSMUSG00000036513	Commd2	COMM domain containing 2						64.0796	72.5835	71.0726	69.7251	84.5743	73.9397	73.7107	72.6332	72.7898	2.02362	1761
ENSMUSG00000039985	Sinhcaf	SIN3-HDAC complex associated factor						59.1765	67.9662	75.8365	79.0153	73.6812	73.3483	77.462	74.7537	72.655	2.24911	1762
ENSMUSG00000026500	Cox20	cytochrome c oxidase assembly protein 20						80.3235	73.3106	78.2015	60.5061	60.2285	76.2599	71.8434	80.1919	72.6082	2.8737	1763
ENSMUSG00000027954	Efna1	ephrin A1						61.3101	67.1698	66.8635	71.5414	83.1457	73.7797	77.5901	79.0439	72.5555	2.5704	1764
ENSMUSG00000031754	Nudt21	nudix (nucleoside diphosphate linked moiety X)-type motif 21						69.8713	69.4534	72.2366	68.7098	70.0823	74.5274	74.479	81.0723	72.554	1.45135	1765
ENSMUSG00000020993	Trappc6b	trafficking protein particle complex 6B						73.4089	62.1812	65.1758	69.9943	80.7159	73.4618	77.5253	77.5186	72.4977	2.26027	1766
ENSMUSG00000040667	Nup88	nucleoporin 88						62.0752	64.1464	66.108	74.5307	83.8	73.8668	78.6229	76.0277	72.3972	2.68212	1767
ENSMUSG00000015291	Gdi1	guanosine diphosphate (GDP) dissociation inhibitor 1						57.6153	68.7249	73.1475	66.3729	91.7519	68.7616	79.0291	73.6432	72.3808	3.54108	1768
ENSMUSG00000030629	Zfand6	zinc finger, AN1-type domain 6						67.5443	63.3261	70.0205	71.9084	68.628	77.8845	80.0546	79.4045	72.3464	2.17025	1769
ENSMUSG00000057858	Fam204a	family with sequence similarity 204, member A						64.6949	62.7204	77.7627	69.8988	71.0132	76.4671	79.2153	76.5345	72.2884	2.19571	1770
ENSMUSG00000002679	Med6	mediator complex subunit 6						65.5977	64.6841	67.9168	66.377	79.941	77.6712	75.5645	80.3593	72.264	2.39064	1771
ENSMUSG00000026074	Map4k4	mitogen-activated protein kinase kinase kinase kinase 4		Mitogen-activated protein kinase kinase kinase kinases				65.9533	72.5777	70.5928	79.7531	73.5713	62.7931	77.2041	75.2579	72.2129	1.99802	1772
ENSMUSG00000025223	Ldb1	LIM domain binding 1						58.025	68.8578	69.7213	85.7867	82.4097	67.7496	74.0629	70.9991	72.2015	3.08162	1773
ENSMUSG00000025825	Iscu	iron-sulfur cluster assembly enzyme						71.7133	69.7567	66.3269	74.5559	79.2094	68.5389	71.939	75.4958	72.192	1.46212	1774
ENSMUSG00000061479	Snrpa	small nuclear ribonucleoprotein polypeptide A						66.9514	67.496	68.5191	70.7309	79.4818	71.976	74.589	77.594	72.1673	1.65428	1775
ENSMUSG00000007659	Bcl2l1	BCL2-like 1						63.8844	68.791	71.2803	78.2402	72.5427	70.7284	77.9696	73.3749	72.1014	1.66354	1776
ENSMUSG00000032218	Ccnb2	cyclin B2						59.3975	71.5854	73.3042	72.6143	84.4307	74.3374	69.1815	71.8809	72.0915	2.42366	1777
ENSMUSG00000025487	Psmd13	proteasome (prosome, macropain) 26S subunit, non-ATPase, 13						62.1729	68.0336	77.238	66.5261	82.5236	71.9464	72.8598	75.0812	72.0477	2.27827	1778
ENSMUSG00000028484	Psip1	PC4 and SFRS1 interacting protein 1						64.4824	65.1022	73.0977	73.234	63.6299	74.6019	77.6542	84.4578	72.0325	2.57324	1779
ENSMUSG00000002728	Naa20	N(alpha)-acetyltransferase 20, NatB catalytic subunit						66.8947	67.9592	63.6488	68.1567	70.5965	75.9638	85.9772	77.0627	72.0325	2.55501	1780
ENSMUSG00000000826	Dnajc5	DnaJ heat shock protein family (Hsp40) member C5						65.1976	66.9304	74.3639	73.3497	83.8777	70.439	75.2033	66.8608	72.0278	2.15293	1781
ENSMUSG00000036504	Phpt1	phosphohistidine phosphatase 1						70.4994	67.9428	73.7242	66.9007	79.5137	80.9519	65.2868	70.9855	71.9756	2.02824	1782
ENSMUSG00000025041	Nt5c2	5'-nucleotidase, cytosolic II						59.5531	67.0978	80.9979	73.9954	66.8092	77.2271	78.9475	70.8974	71.9407	2.56217	1783
ENSMUSG00000012350	Ehf	ets homologous factor	ETS					67.4459	68.919	72.1012	80.4805	74.9916	68.0717	69.3527	73.9533	71.9145	1.56587	1784
ENSMUSG00000034161	Scx	scleraxis	bHLH					61.3566	66.1552	72.5568	78.7451	91.2847	66.372	68.8752	69.9378	71.9104	3.30253	1785
ENSMUSG00000047714	Ppp1r2	protein phosphatase 1, regulatory inhibitor subunit 2						60.4321	66.428	70.1727	71.1453	74.4666	72.6053	78.1141	81.917	71.9101	2.35678	1786
ENSMUSG00000054455	Vapb	vesicle-associated membrane protein, associated protein B and C						68.4632	70.5226	76.2038	64.8524	85.6242	73.3725	61.6504	74.4119	71.8876	2.61788	1787
ENSMUSG00000004864	Mapk13	mitogen-activated protein kinase 13		Mitogen-activated protein kinases				63.7513	66.2052	69.4442	73.3844	82.0994	74.502	76.9484	68.3958	71.8413	2.13642	1788
ENSMUSG00000005813	Metap1	methionyl aminopeptidase 1						63.6774	65.1252	74.2206	71.4719	70.4508	71.4526	81.7406	76.417	71.8195	2.064	1789
ENSMUSG00000001285	Myg1	melanocyte proliferating gene 1						58.0613	64.4808	75.9183	74.8618	70.6039	76.3793	76.8302	76.5947	71.7163	2.46147	1790
ENSMUSG00000040112	Mrps35	mitochondrial ribosomal protein S35						60.0839	66.8472	80.7387	67.6251	85.7381	77.0478	65.8097	69.6482	71.6923	3.05123	1791
ENSMUSG00000025025	Mxi1	MAX interactor 1, dimerization protein	bHLH					63.3288	67.1123	71.8812	69.8863	73.6631	72.1062	78.7438	76.6242	71.6682	1.75418	1792
ENSMUSG00000056962	Jmjd6	jumonji domain containing 6						58.8687	69.6062	67.5063	69.3967	80.4153	72.2438	81.1331	73.9466	71.6396	2.5431	1793
ENSMUSG00000003813	Rad23a	RAD23 homolog A, nucleotide excision repair protein						59.0929	70.4386	70.2436	72.4	82.5453	73.5401	72.8391	71.7354	71.6044	2.25742	1794
ENSMUSG00000017776	Crk	v-crk avian sarcoma virus CT10 oncogene homolog						64.407	68.7531	70.5819	76.4714	70.8781	69.2282	75.6158	76.5835	71.5649	1.5336	1795
ENSMUSG00000015341	Golga7	golgi autoantigen, golgin subfamily a, 7						62.9378	65.6403	67.5978	63.1787	75.4482	76.7062	80.3807	80.1732	71.5079	2.63527	1796
ENSMUSG00000032359	Ctsh	cathepsin H						71.4737	70.0831	73.2012	68.1981	69.8906	68.2165	73.7412	77.2171	71.5027	1.09286	1797
ENSMUSG00000031516	Dctn6	dynactin 6						60.1305	71.5362	71.8854	67.7407	80.0638	80.0869	73.448	66.3958	71.4109	2.39197	1798
ENSMUSG00000027303	Ptpra	protein tyrosine phosphatase, receptor type, A						63.1122	68.065	72.1498	75.3953	76.8993	69.888	72.0783	73.6898	71.4097	1.55014	1799
ENSMUSG00000037601	Nme1	NME/NM23 nucleoside diphosphate kinase 1		Unclassified				64.1194	66.6411	66.7283	69.225	73.37	80.0355	83.4577	67.61	71.3984	2.46553	1800
ENSMUSG00000025574	Tk1	thymidine kinase 1		Deoxyribonucleoside kinases				59.9065	66.7819	73.7121	71.4047	80.7845	74.3548	73.1966	70.9579	71.3874	2.15056	1801
ENSMUSG00000046756	Mrps7	mitchondrial ribosomal protein S7						66.5545	61.6176	72.1192	68.8347	84.4073	77.8891	67.8736	71.3213	71.3272	2.4999	1802
ENSMUSG00000020671	Rab10	RAB10, member RAS oncogene family						64.3525	69.9747	72.9709	74.4282	65.2398	72.1888	71.7509	79.4733	71.2974	1.72754	1803
ENSMUSG00000056050	Mia3	melanoma inhibitory activity 3						55.6436	71.0333	73.0717	76.2286	57.9104	76.0041	80.2055	80.0856	71.2728	3.3555	1804
ENSMUSG00000021823	Vcl	vinculin						68.8131	62.059	68.579	79.4421	78.4633	67.6268	70.6652	74.3686	71.2521	2.06971	1805
ENSMUSG00000062554	Gm12751	predicted gene 12751						79.4667	77.7463	70.4595	68.5387	80.3269	75.3182	60.7314	57.0256	71.2017	3.07521	1806
ENSMUSG00000029761	Cald1	caldesmon 1						58.4502	65.3604	69.5208	88.3448	83.5471	59.5017	61.8608	82.9332	71.1899	4.24182	1807
ENSMUSG00000003037	Rab8a	RAB8A, member RAS oncogene family						65.223	62.5981	70.2459	66.0948	83.6338	76.1203	66.7024	78.7757	71.1742	2.64951	1808
ENSMUSG00000024019	Cmtr1	cap methyltransferase 1						57.1077	66.5157	68.4577	82.7162	80.7539	69.1338	73.5525	70.0832	71.0401	2.87477	1809
ENSMUSG00000026229	Psmd1	proteasome (prosome, macropain) 26S subunit, non-ATPase, 1						59.4256	64.591	74.9536	73.8425	70.4299	72.821	75.3793	76.3252	70.971	2.11257	1810
ENSMUSG00000020476	Dbnl	drebrin-like						56.4918	67.5917	66.3223	76.7342	80.619	71.873	78.0062	69.4998	70.8923	2.74317	1811
ENSMUSG00000027215	Cd82	CD82 antigen						63.4245	71.6346	72.7001	77.1566	77.2006	69.2197	69.5778	66.1102	70.878	1.72179	1812
ENSMUSG00000023286	Ube2j2	ubiquitin-conjugating enzyme E2J 2						58.1435	70.5898	76.3318	71.8147	76.3696	68.9173	74.2188	70.5952	70.8726	2.06205	1813
ENSMUSG00000022945	Chaf1b	chromatin assembly factor 1, subunit B (p60)						59.5343	66.8494	68.6351	79.5024	75.4358	69.2172	73.7369	72.9984	70.7387	2.15624	1814
ENSMUSG00000029066	Mrpl20	mitochondrial ribosomal protein L20						64.7888	68.9619	66.2776	67.7632	74.9043	77.3883	74.4682	70.7752	70.6659	1.5966	1815
ENSMUSG00000025510	Cd151	CD151 antigen						55.5148	67.3183	66.0005	75.8875	85.2926	73.5313	71.2645	70.1471	70.6196	3.02535	1816
ENSMUSG00000005204	Senp3	SUMO/sentrin specific peptidase 3						56.9483	63.0305	80.1445	73.4627	86.9003	69.6922	69.9099	64.6508	70.5924	3.39472	1817
ENSMUSG00000025220	Mgea5	meningioma expressed antigen 5 (hyaluronidase)						69.8005	68.9983	77.1228	76.4566	64.2429	64.6531	71.4091	71.9369	70.5775	1.68113	1818
ENSMUSG00000031207	Msn	moesin						63.1001	67.679	67.6774	78.3892	69.2564	68.5501	72.4453	77.4862	70.573	1.84595	1819
ENSMUSG00000022797	Tfrc	transferrin receptor						62.7726	69.6391	70.9168	75.9357	66.1537	68.0314	76.7834	74.0726	70.5382	1.72891	1820
ENSMUSG00000003824	Syce2	synaptonemal complex central element protein 2						72.6885	62.5342	67.0701	70.4586	70.3011	72.4342	74.1373	73.7803	70.4255	1.38703	1821
ENSMUSG00000028953	Abcf2	ATP-binding cassette, sub-family F (GCN20), member 2			ATP binding cassette subfamily F			57.1701	66.1148	69.6291	75.2834	77.0002	70.1078	73.7481	73.0052	70.2573	2.23334	1822
ENSMUSG00000038622	Med30	mediator complex subunit 30						65.8797	70.5507	67.8488	62.5051	76.7861	77.2433	74.0365	66.4493	70.1624	1.91464	1823
ENSMUSG00000013698	Pea15a	phosphoprotein enriched in astrocytes 15A						62.2788	66.115	67.0144	73.3233	73.3622	72.8204	72.9461	73.2675	70.141	1.54182	1824
ENSMUSG00000028049	Scamp3	secretory carrier membrane protein 3						57.9342	65.6643	71.5548	76.3351	79.7531	65.7766	73.819	70.2245	70.1327	2.4436	1825
ENSMUSG00000029234	Tmem165	transmembrane protein 165						62.3805	68.2256	69.1843	75.5971	68.9492	66.4543	81.1395	69.1292	70.1324	2.03356	1826
ENSMUSG00000077450	Rab11b	RAB11B, member RAS oncogene family						65.27	67.48	67.4511	74.3993	80.3816	64.6063	74.1034	67.0316	70.0904	1.96863	1827
ENSMUSG00000062488	Ifit3b	interferon-induced protein with tetratricopeptide repeats 3B						68.1728	66.9216	67.2024	77.5223	74.9169	64.3776	67.867	73.5448	70.0657	1.63715	1828
ENSMUSG00000033918	Parl	presenilin associated, rhomboid-like						52.8961	64.8661	72.9564	69.127	75.107	71.3769	74.4229	79.7219	70.0593	2.89837	1829
ENSMUSG00000020594	Pum2	pumilio RNA-binding family member 2						65.3574	67.9224	74.2731	79.3449	65.5824	61.1629	72.1407	74.3311	70.0144	2.12303	1830
ENSMUSG00000022757	Tfg	Trk-fused gene						60.7399	65.1425	66.8463	66.3983	70.1918	74.0155	75.3336	81.1681	69.9795	2.3207	1831
ENSMUSG00000057130	Txnl4a	thioredoxin-like 4A						63.55	71.1923	78.8981	71.0905	80.9377	65.7827	61.9345	66.21	69.9495	2.46476	1832
ENSMUSG00000020076	Ddx50	DEAD (Asp-Glu-Ala-Asp) box polypeptide 50						63.2882	66.0563	67.1682	66.9674	69.7133	73.0131	74.6905	78.6129	69.9387	1.80836	1833
ENSMUSG00000027333	Smox	spermine oxidase						63.7228	69.5017	65.8983	72.4123	84.1853	69.3458	68.897	65.1813	69.8931	2.26893	1834
ENSMUSG00000022247	Brix1	BRX1, biogenesis of ribosomes						52.2826	67.2002	65.2229	62.2264	62.0771	86.8281	77.6923	85.3078	69.8547	4.31833	1835
ENSMUSG00000058239	Usf2	upstream transcription factor 2	bHLH					59.2296	67.6499	70.1708	72.3057	78.5865	66.0234	74.0192	70.852	69.8546	2.04032	1836
ENSMUSG00000029405	G3bp2	GTPase activating protein (SH3 domain) binding protein 2						58.8669	68.3797	71.8539	74.3187	65.1232	69.4283	73.447	76.8838	69.7877	2.03399	1837
ENSMUSG00000066553	Gm6969	predicted pseudogene 6969						63.1891	73.2426	77.9653	69.3515	69.1051	70.9443	66.8855	67.5493	69.7791	1.56854	1838
ENSMUSG00000001415	Smg5	Smg-5 homolog, nonsense mediated mRNA decay factor (C. elegans)						61.2451	63.5005	67.6534	83.6288	74.7017	65.8858	72.1597	69.4427	69.7772	2.51337	1839
ENSMUSG00000078622	Ccdc47	coiled-coil domain containing 47						56.2565	69.7949	70.229	81.6	74.8257	62.9052	71.9299	70.5521	69.7617	2.67507	1840
ENSMUSG00000006418	Rnf114	ring finger protein 114						62.5319	66.7925	65.5026	70.6163	79.3799	67.9318	73.8001	71.2846	69.73	1.86335	1841
ENSMUSG00000031939	Taf1d	TATA-box binding protein associated factor, RNA polymerase I, D						67.9564	68.0905	65.5039	62.8587	67.1607	70.5968	75.6245	80.0447	69.7295	1.97935	1842
ENSMUSG00000019837	Gtf3c6	general transcription factor IIIC, polypeptide 6, alpha						61.4271	63.9053	66.6088	76.8476	70.8911	71.1729	75.7421	70.6697	69.6581	1.90715	1843
ENSMUSG00000022462	Slc38a2	solute carrier family 38, member 2			Solute carriers			60.3879	67.0598	70.7838	84.0582	63.363	61.0942	72.6609	77.6222	69.6287	2.94814	1844
ENSMUSG00000021794	Glud1	glutamate dehydrogenase 1						65.0009	69.3689	70.8462	76.7057	62.2821	68.0438	72.3909	72.3279	69.6208	1.60607	1845
ENSMUSG00000029273	Sult1d1	sulfotransferase family 1D, member 1						58.9516	57.4278	63.7862	66.2819	66.3423	67.8727	86.663	89.4801	69.6007	4.23911	1846
ENSMUSG00000037960	Card19	caspase recruitment domain family, member 19						66.1316	70.0027	67.7852	67.3174	80.0422	71.0118	67.5612	66.3632	69.5269	1.61643	1847
ENSMUSG00000038612	Mcl1	myeloid cell leukemia sequence 1						60.756	64.5076	70.0797	72.9929	68.825	66.5604	74.8502	77.5976	69.5212	1.96944	1848
ENSMUSG00000040782	Cop1	COP1, E3 ubiquitin ligase						56.5893	70.2012	67.3001	79.1378	77.6664	68.803	68.1935	68.2118	69.5129	2.44746	1849
ENSMUSG00000029817	Tra2a	transformer 2 alpha						67.4684	63.6552	66.086	67.5749	71.1367	67.4766	74.0875	78.4374	69.4903	1.6974	1850
ENSMUSG00000022346	Myc	myelocytomatosis oncogene	bHLH					54.3843	64.6464	65.8861	72.5855	77.2722	68.5049	76.2534	76.3331	69.4832	2.7656	1851
ENSMUSG00000024360	Etf1	eukaryotic translation termination factor 1						61.918	68.7754	68.4708	69.1967	61.9171	69.5426	78.1044	77.7013	69.4533	2.1462	1852
ENSMUSG00000024943	Smc5	structural maintenance of chromosomes 5						61.8476	68.3989	69.651	74.5066	64.2505	60.6097	73.7752	82.5639	69.4504	2.60624	1853
ENSMUSG00000027900	Dram2	DNA-damage regulated autophagy modulator 2						65.0696	63.3086	63.4752	65.8522	70.3656	76.2257	73.352	76.2358	69.2356	1.95119	1854
ENSMUSG00000015869	Prpsap1	phosphoribosyl pyrophosphate synthetase-associated protein 1						58.4905	63.5486	66.1487	73.2063	82.9118	64.1836	72.3239	72.1329	69.1183	2.6842	1855
ENSMUSG00000067212	H2-T23	histocompatibility 2, T region locus 23						55.9597	65.8975	59.579	70.8741	88.2838	69.1731	73.7754	68.8994	69.0553	3.45022	1856
ENSMUSG00000028256	Odf2l	outer dense fiber of sperm tails 2-like						49.2441	66.2468	70.2421	78.8028	74.3425	60.4371	67.9719	84.8773	69.0206	3.89716	1857
ENSMUSG00000049299	Trappc1	trafficking protein particle complex 1						62.5248	65.7655	72.3788	65.8043	71.011	70.2172	73.4434	70.9082	69.0067	1.35573	1858
ENSMUSG00000020056	Washc3	WASH complex subunit 3						65.7039	66.7229	69.2856	60.093	66.6577	79.8811	70.5307	73.1136	68.9985	2.06421	1859
ENSMUSG00000033228	Scaf11	SR-related CTD-associated factor 11						59.4647	66.9526	72.5298	76.6852	69.4316	61.1703	70.5112	75.1889	68.9918	2.19052	1860
ENSMUSG00000079111	Kdelr2	KDEL (Lys-Asp-Glu-Leu) endoplasmic reticulum protein retention receptor 2						60.0747	66.2138	69.1965	67.8359	69.1296	73.2852	73.0515	72.9327	68.965	1.57587	1861
ENSMUSG00000029178	Klf3	Kruppel-like factor 3 (basic)	zf-C2H2					61.2257	62.5413	73.8947	68.9699	77.2314	61.6646	74.8449	70.6801	68.8816	2.25417	1862
ENSMUSG00000061136	Prpf40a	pre-mRNA processing factor 40A						49.6472	67.6915	67.3604	78.6771	70.6533	62.5149	72.4883	81.3969	68.8037	3.49211	1863
ENSMUSG00000067194	Eif1ax	eukaryotic translation initiation factor 1A, X-linked						61.2159	72.8295	65.9713	67.1809	94.2422	63.7623	61.2185	63.9734	68.7993	3.86799	1864
ENSMUSG00000027998	Plrg1	pleiotropic regulator 1						55.6622	62.4644	63.4986	65.6081	79.0329	71.9213	76.2369	75.8039	68.7785	2.89658	1865
ENSMUSG00000048578	Mlec	malectin						67.9486	66.9444	73.1946	73.992	54.1894	68.1505	78.705	66.8437	68.746	2.55734	1866
ENSMUSG00000017774	Myo1c	myosin IC						63.6222	68.3817	69.8109	76.2623	65.9602	66.9114	71.4315	67.5812	68.7452	1.36087	1867
ENSMUSG00000020471	Pold2	polymerase (DNA directed), delta 2, regulatory subunit						49.2823	65.7145	68.3529	70.5138	80.1781	70.2884	67.4085	77.7111	68.6812	3.29097	1868
ENSMUSG00000007039	Ddah2	dimethylarginine dimethylaminohydrolase 2						58.4095	62.4039	66.811	67.2707	78.7089	71.2492	69.9326	74.3566	68.6428	2.2808	1869
ENSMUSG00000089847	Timm10b	translocase of inner mitochondrial membrane 10B						71.3408	71.7255	68.7675	71.345	79.2777	65.6508	54.8004	66.1582	68.6332	2.47826	1870
ENSMUSG00000032715	Trib3	tribbles pseudokinase 3		Unclassified				48.1758	63.978	67.2512	72.2712	77.3569	61.5282	84.7007	72.6412	68.4879	3.90961	1871
ENSMUSG00000022552	Sharpin	SHANK-associated RH domain interacting protein						49.8106	60.2421	74.8347	72.221	75.8689	78.3413	65.2256	71.3019	68.4808	3.38374	1872
ENSMUSG00000028048	Gba	glucosidase, beta, acid						57.9414	66.5302	65.5172	71.7468	79.4506	66.3548	72.119	68.0759	68.467	2.20628	1873
ENSMUSG00000039617	Gm7488	predicted gene 7488						72.0022	65.5733	62.1902	62.4076	70.0015	77.8965	70.0354	66.5493	68.332	1.86245	1874
ENSMUSG00000040435	Ppp1r15a	protein phosphatase 1, regulatory subunit 15A						60.0002	60.9658	66.2659	64.5165	77.5426	61.5279	70.2992	85.3235	68.3052	3.17978	1875
ENSMUSG00000022791	Tnk2	tyrosine kinase, non-receptor, 2		TNK family tyrosine kinases				68.2357	64.9152	77.9634	85.8605	79.3207	56.9935	60.9365	52.2089	68.3043	4.174	1876
ENSMUSG00000011114	Tbrg1	transforming growth factor beta regulated gene 1						59.1261	67.5586	65.1566	63.4112	74.9349	71.3137	72.3665	72.0894	68.2446	1.90144	1877
ENSMUSG00000098269	Mir8094	microRNA 8094						44.6427	52.8801	64.7231	97.3189	70.0763	67.32	74.8809	73.8451	68.2109	5.55884	1878
ENSMUSG00000042729	Wdr74	WD repeat domain 74						55.8888	58.3973	67.945	71.1547	76.7259	71.8197	75.9322	67.1343	68.1248	2.68304	1879
ENSMUSG00000020780	Srp68	signal recognition particle 68						60.0561	62.7362	67.9217	68.9412	77.497	66.595	71.9489	68.1823	67.9848	1.88744	1880
ENSMUSG00000021595	Nsun2	NOL1/NOP2/Sun domain family member 2						60.5794	66.2593	66.779	68.8606	68.4483	69.3222	72.8283	70.6083	67.9607	1.28438	1881
ENSMUSG00000039515	Ptpa	protein phosphatase 2 protein activator						57.3792	66.8406	66.375	71.5756	77.3794	72.3753	63.979	66.8103	67.8393	2.12999	1882
ENSMUSG00000017386	Traf4	TNF receptor associated factor 4						62.456	64.4679	68.7271	74.8877	72.9094	64.2724	66.0742	68.6704	67.8081	1.54134	1883
ENSMUSG00000030224	Strap	serine/threonine kinase receptor associated protein						59.1046	64.4457	67.2454	67.8569	66.0492	71.2691	72.032	74.4195	67.8028	1.71131	1884
ENSMUSG00000034317	Trim59	tripartite motif-containing 59						58.8225	62.5055	69.8019	70.9834	57.635	64.9804	70.774	86.8329	67.7919	3.28726	1885
ENSMUSG00000003068	Stk11	serine/threonine kinase 11		Unclassified				68.3891	64.1579	68.0689	78.8991	70.3209	62.592	66.3388	63.362	67.7661	1.85247	1886
ENSMUSG00000035152	Ap2b1	adaptor-related protein complex 2, beta 1 subunit						62.5397	69.0231	74.3645	75.3013	64.2543	63.7351	65.8286	67.0205	67.7584	1.70139	1887
ENSMUSG00000020733	Slc9a3r1	solute carrier family 9 (sodium/hydrogen exchanger), member 3 regulator 1						58.1807	66.258	67.765	73.2909	69.3551	68.7024	69.8846	68.2639	67.7126	1.5399	1888
ENSMUSG00000020897	Aurkb	aurora kinase B		Unclassified				54.8957	63.6337	68.7571	68.6046	81.5694	67.7288	70.062	66.4221	67.7092	2.61176	1889
ENSMUSG00000000827	Tpd52l2	tumor protein D52-like 2						58.1154	63.3346	70.0557	61.71	70.7263	76.055	66.0743	75.5392	67.7013	2.29678	1890
ENSMUSG00000001924	Uba1	ubiquitin-like modifier activating enzyme 1						57.4702	65.5755	73.0762	72.4754	74.7841	63.5807	66.6963	67.6586	67.6646	2.02229	1891
ENSMUSG00000027968	Larp7	La ribonucleoprotein domain family, member 7						59.5664	62.3223	63.6863	68.9356	68.3385	67.2516	72.9833	78.1417	67.6532	2.11392	1892
ENSMUSG00000028393	Alad	aminolevulinate, delta-, dehydratase						60.1004	69.5891	65.6947	64.3001	76.3066	71.0669	66.6845	67.0992	67.6052	1.70939	1893
ENSMUSG00000022111	Uchl3	ubiquitin carboxyl-terminal esterase L3 (ubiquitin thiolesterase)						66.7649	62.4338	68.1143	61.6626	63.8961	73.0486	72.1018	72.259	67.5351	1.62706	1894
ENSMUSG00000036639	Nudt1	nudix (nucleoside diphosphate linked moiety X)-type motif 1						57.892	59.8994	61.6063	61.3157	81.7089	64.6688	77.9398	75.1785	67.5262	3.27577	1895
ENSMUSG00000052310	Slc39a1	solute carrier family 39 (zinc transporter), member 1			Solute carriers			62.5741	64.9459	69.0459	72.5179	64.176	68.9262	70.7186	67.2187	67.5154	1.20917	1896
ENSMUSG00000058013	Sept11	septin 11						60.5213	63.181	72.1799	76.2347	62.5907	68.0112	68.8298	68.2295	67.4723	1.85265	1897
ENSMUSG00000069833	Ahnak	AHNAK nucleoprotein (desmoyokin)						69.2026	68.8353	65.2685	67.058	58.9061	65.196	73.3503	71.9545	67.4714	1.59845	1898
ENSMUSG00000058355	Abce1	ATP-binding cassette, sub-family E (OABP), member 1			ATP binding cassette subfamily E			55.2127	62.9013	65.6681	66.6925	61.471	69.1025	76.3757	81.9292	67.4191	2.99398	1899
ENSMUSG00000027002	Nckap1	NCK-associated protein 1						57.3947	63.6653	68.555	72.185	66.5157	63.533	69.2232	78.1059	67.3972	2.20373	1900
ENSMUSG00000040618	Pck2	phosphoenolpyruvate carboxykinase 2 (mitochondrial)		Unclassified				56.1693	66.2133	65.3708	73.1732	75.4965	67.0916	73.1457	62.4315	67.3865	2.26909	1901
ENSMUSG00000054408	Spcs3	signal peptidase complex subunit 3 homolog (S. cerevisiae)						57.7127	62.5784	66.2552	66.668	60.9132	70.6576	76.0814	78.1613	67.3785	2.5453	1902
ENSMUSG00000029657	Hsph1	heat shock 105kDa/110kDa protein 1						55.8614	64.7985	65.0465	78.4015	62.3071	64.1362	73.0187	75.109	67.3349	2.6526	1903
ENSMUSG00000020782	Llgl2	LLGL2 scribble cell polarity complex component						53.3161	69.768	69.3127	69.6912	74.3834	62.905	71.4351	67.5453	67.2946	2.30705	1904
ENSMUSG00000097195	Snhg5	small nucleolar RNA host gene 5						67.5258	68.297	63.7069	61.0262	57.3601	76.1151	68.9496	75.3415	67.2903	2.30376	1905
ENSMUSG00000021266	Wars	tryptophanyl-tRNA synthetase						54.9582	65.2568	67.1382	74.5216	70.8143	64.8742	70.0731	70.4982	67.2668	2.09087	1906
ENSMUSG00000034820	Cpsf7	cleavage and polyadenylation specific factor 7						60.448	60.2061	72.6974	74.8559	69.9966	61.7354	71.6141	66.5399	67.2617	2.07412	1907
ENSMUSG00000019960	Dusp6	dual specificity phosphatase 6						55.4711	66.2683	62.1612	71.456	68.3973	67.9582	73.136	73.132	67.2475	2.1312	1908
ENSMUSG00000025190	Got1	glutamic-oxaloacetic transaminase 1, soluble						53.7634	62.4538	63.3877	65.8254	77.3623	70.3684	71.3876	73.0319	67.1976	2.61981	1909
ENSMUSG00000002064	Sdf2	stromal cell derived factor 2						60.6883	65.8871	64.9053	64.3413	74.4635	72.7577	66.7786	67.6795	67.1877	1.59025	1910
ENSMUSG00000008200	Fnbp4	formin binding protein 4						64.3549	60.1852	74.63	65.6623	79.4306	56.2763	73.0359	63.2953	67.1088	2.78075	1911
ENSMUSG00000045817	Zfp36l2	zinc finger protein 36, C3H type-like 2						60.9372	67.2004	66.9428	73.4556	75.057	60.6301	66.8642	65.7227	67.1013	1.82019	1912
ENSMUSG00000007777	0610009B22Rik	RIKEN cDNA 0610009B22 gene						63.2389	66.0956	68.9689	61.3125	65.4404	73.2109	67.2336	71.1642	67.0831	1.39857	1913
ENSMUSG00000071379	Hpcal1	hippocalcin-like 1						62.053	68.792	69.9219	71.6372	70.5052	63.0127	66.3179	64.3257	67.0707	1.29206	1914
ENSMUSG00000025007	Aldh18a1	aldehyde dehydrogenase 18 family, member A1						51.6533	67.6807	66.0397	74.4224	75.3047	62.8728	68.9927	68.9912	66.9947	2.62521	1915
ENSMUSG00000005262	Ufd1	ubiquitin recognition factor in ER-associated degradation 1						56.2203	57.9717	68.9019	60.538	76.1285	71.3467	73.9369	70.8926	66.9921	2.70114	1916
ENSMUSG00000024981	Acsl5	acyl-CoA synthetase long-chain family member 5						59.7592	60.1246	64.2339	75.1024	70.4184	62.3443	67.0386	76.7905	66.9765	2.32307	1917
ENSMUSG00000021190	Lgmn	legumain						57.0379	62.8621	67.8405	72.6347	75.0049	61.4982	68.6666	69.9803	66.9406	2.13308	1918
ENSMUSG00000030894	Tpp1	tripeptidyl peptidase I						50.8536	67.9034	63.0774	75.9294	80.6781	54.3926	75.1312	67.3424	66.9135	3.70533	1919
ENSMUSG00000027533	Fabp5	fatty acid binding protein 5, epidermal						62.4807	65.8338	62.8149	57.4024	71.7911	73.1752	70.5125	71.0459	66.8821	1.98699	1920
ENSMUSG00000020929	Eftud2	elongation factor Tu GTP binding domain containing 2						55.6856	65.3938	66.5413	72.2393	76.7872	64.2573	65.4134	68.6467	66.8706	2.18216	1921
ENSMUSG00000032374	Plod2	procollagen lysine, 2-oxoglutarate 5-dioxygenase 2						67.0571	67.2224	67.7692	71.3694	74.4824	56.2669	68.4858	61.9025	66.8195	1.97689	1922
ENSMUSG00000037820	Tgm2	transglutaminase 2, C polypeptide						56.3339	67.3633	60.7136	72.4938	71.367	67.4932	71.3997	67.3857	66.8188	1.99175	1923
ENSMUSG00000052459	Atp6v1a	ATPase, H+ transporting, lysosomal V1 subunit A						55.0551	68.7186	66.5948	67.4233	64.6916	65.1404	74.1443	72.2423	66.7513	2.03888	1924
ENSMUSG00000090877	Hspa1b	heat shock protein 1B						55.0899	71.7132	65.9967	75.6483	74.5086	58.4447	68.7436	63.2527	66.6747	2.62431	1925
ENSMUSG00000031590	Frg1	FSHD region gene 1						59.046	62.7343	59.9572	61.5204	67.5785	72.8738	72.5341	76.3549	66.5749	2.36274	1926
ENSMUSG00000026761	Orc4	origin recognition complex, subunit 4						48.8396	58.7362	70.6412	67.7719	68.7516	72.8409	72.9375	72.0242	66.5679	3.01227	1927
ENSMUSG00000021967	Mrpl57	mitochondrial ribosomal protein L57						54.3866	67.8866	69.2585	67.6027	72.0033	69.2015	66.2289	65.7708	66.5424	1.86919	1928
ENSMUSG00000033845	Mrpl15	mitochondrial ribosomal protein L15						58.7414	62.4828	56.9821	65.2147	76.912	73.128	67.3996	70.9081	66.4711	2.46819	1929
ENSMUSG00000004945	Tmem242	transmembrane protein 242						67.8152	67.5169	66.0514	59.222	64.2326	71.7284	66.2101	68.9703	66.4684	1.29965	1930
ENSMUSG00000085241	Snhg3	small nucleolar RNA host gene 3						88.5833	65.0519	65.4235	65.1769	44.0939	69.2481	62.2046	71.903	66.4607	4.32991	1931
ENSMUSG00000008604	Ubqln4	ubiquilin 4						58.5836	64.912	67.369	73.4495	65.4859	61.679	72.8966	66.5529	66.366	1.7893	1932
ENSMUSG00000022300	Dcaf13	DDB1 and CUL4 associated factor 13						57.8283	61.1374	61.6978	59.8979	66.6509	69.1579	77.3308	76.979	66.335	2.6879	1933
ENSMUSG00000070348	Ccnd1	cyclin D1						59.8602	71.2017	64.5624	70.2743	58.1727	69.5463	65.2617	71.1282	66.2509	1.81892	1934
ENSMUSG00000003051	Elf3	E74-like factor 3	ETS					61.8018	64.3421	62.304	67.3751	69.844	67.3577	70.7703	65.9287	66.2155	1.15676	1935
ENSMUSG00000050017	Pitpnb	phosphatidylinositol transfer protein, beta						56.8083	60.6542	64.0537	69.6015	68.5373	66.9902	72.3047	70.739	66.2111	1.88553	1936
ENSMUSG00000010358	Ifi35	interferon-induced protein 35						49.2713	61.993	60.4668	69.5597	88.5063	64.0579	70.2601	65.2557	66.1714	3.93693	1937
ENSMUSG00000040322	Slc25a24	solute carrier family 25 (mitochondrial carrier, phosphate carrier), member 24			Solute carriers			57.5495	64.1753	65.6605	68.48	58.8619	66.7895	69.6657	78.079	66.1577	2.2824	1938
ENSMUSG00000001424	Snd1	staphylococcal nuclease and tudor domain containing 1						62.4002	61.7808	78.3226	67.0048	75.016	59.9237	74.7269	49.8045	66.1224	3.38104	1939
ENSMUSG00000006169	Clint1	clathrin interactor 1						56.3567	65.7084	67.4865	72.9545	64.3716	62.9387	68.169	70.709	66.0868	1.80522	1940
ENSMUSG00000028041	Adam15	a disintegrin and metallopeptidase domain 15 (metargidin)						54.0421	60.8018	72.1231	77.4908	78.2278	60.0278	64.0537	61.8864	66.0817	3.12075	1941
ENSMUSG00000066232	Ipo7	importin 7						56.4532	63.2617	70.2045	65.5974	61.0283	64.6414	71.9203	75.5114	66.0773	2.18971	1942
ENSMUSG00000030341	Tnfrsf1a	tumor necrosis factor receptor superfamily, member 1a						58.0519	65.0517	67.631	73.5574	69.13	62.2637	66.5017	66.3622	66.0687	1.62541	1943
ENSMUSG00000027937	Jtb	jumping translocation breakpoint						56.9879	58.4801	66.1852	70.7525	69.2611	69.1663	71.9936	65.3888	66.0269	1.97004	1944
ENSMUSG00000031068	Glrx3	glutaredoxin 3						59.0802	66.4331	62.6073	65.5485	65.2512	66.5326	70.379	72.0157	65.9809	1.43919	1945
ENSMUSG00000020430	Pes1	pescadillo ribosomal biogenesis factor 1						55.2206	58.4414	69.99	65.9822	69.4016	69.3521	68.9425	70.3	65.9538	2.06669	1946
ENSMUSG00000020570	Sypl	synaptophysin-like protein						58.5093	60.2294	67.625	70.1537	59.9733	67.8101	69.3053	73.8689	65.9344	1.98975	1947
ENSMUSG00000035278	Plekhj1	pleckstrin homology domain containing, family J member 1						58.1311	64.613	63.59	67.1376	81.706	63.9367	68.1215	60.2099	65.9307	2.53501	1948
ENSMUSG00000026641	Usf1	upstream transcription factor 1	bHLH					51.9562	56.0275	59.672	66.1729	86.7497	70.5002	72.2888	63.8604	65.9035	3.85358	1949
ENSMUSG00000042133	Ppig	peptidyl-prolyl isomerase G (cyclophilin G)						66.3933	60.706	65.4787	63.8402	58.4648	64.606	73.7375	73.9169	65.8929	1.95619	1950
ENSMUSG00000013787	Ehmt2	euchromatic histone lysine N-methyltransferase 2						58.8338	64.6515	70.2077	73.1813	77.2539	58.2474	61.9757	62.1218	65.8091	2.46455	1951
ENSMUSG00000025404	R3hdm2	R3H domain containing 2						56.7864	63.5852	68.2389	73.1453	70.8011	60.6442	68.4889	64.3409	65.7539	1.92255	1952
ENSMUSG00000041645	Ddx24	DEAD (Asp-Glu-Ala-Asp) box polypeptide 24						59.5677	63.8829	67.8328	67.7275	69.0142	64.8557	66.3465	66.6043	65.729	1.05638	1953
ENSMUSG00000010097	Nxf1	nuclear RNA export factor 1						52.3855	62.3123	63.4878	69.8015	67.0913	65.0934	72.691	72.9187	65.7227	2.36701	1954
ENSMUSG00000019795	Pcmt1	protein-L-isoaspartate (D-aspartate) O-methyltransferase 1						59.8022	62.1001	64.6362	64.3601	70.1985	64.7633	72.7373	67.1649	65.7203	1.48475	1955
ENSMUSG00000034707	Gns	glucosamine (N-acetyl)-6-sulfatase						54.1042	67.477	70.7579	79.919	64.9197	58.8701	64.2356	65.4528	65.717	2.72175	1956
ENSMUSG00000023272	Creld2	cysteine-rich with EGF-like domains 2						56.2684	62.8564	72.6517	70.3999	72.7141	63.3195	62.7987	64.3151	65.6655	2.03824	1957
ENSMUSG00000097052	Snora43	small nucleolar RNA, H/ACA box 43						28.4741	65.3971	83.9199	74.4373	64.3194	84.2937	92.8443	31.1587	65.6056	8.52688	1958
ENSMUSG00000024454	Hdac3	histone deacetylase 3						57.7803	60.5558	65.0146	67.2215	70.6852	65.7992	67.6362	69.7115	65.5505	1.56122	1959
ENSMUSG00000019312	Grb7	growth factor receptor bound protein 7						53.8388	59.3505	62.4437	65.6974	75.44	68.0197	72.824	66.2996	65.4892	2.47347	1960
ENSMUSG00000000581	C1d	C1D nuclear receptor co-repressor						53.3024	70.8076	76.6707	68.0618	76.6827	52.1779	58.4492	67.4268	65.4474	3.44402	1961
ENSMUSG00000027479	Mapre1	microtubule-associated protein, RP/EB family, member 1						59.3856	60.0631	65.0243	63.072	54.5492	72.4023	71.8728	76.807	65.397	2.70252	1962
ENSMUSG00000020328	Nudcd2	NudC domain containing 2						58.5199	62.685	60.1623	59.419	67.3733	75.0187	68.6496	71.1873	65.3769	2.14799	1963
ENSMUSG00000028822	Tmem50a	transmembrane protein 50A						55.5863	58.5956	60.0526	62.4372	75.5439	66.2857	74.0733	70.0937	65.3335	2.60798	1964
ENSMUSG00000028032	Papss1	3'-phosphoadenosine 5'-phosphosulfate synthase 1						57.0862	60.5958	65.264	68.5304	72.1874	64.1204	69.3874	65.4679	65.3299	1.71958	1965
ENSMUSG00000022241	Tars	threonyl-tRNA synthetase						56.7961	64.1935	55.2514	69.0852	73.624	62.8313	70.8477	69.8787	65.3135	2.37535	1966
ENSMUSG00000028187	Rpf1	ribosome production factor 1 homolog						53.0408	59.0915	61.9169	62.1603	72.6357	68.716	73.0559	71.2877	65.2381	2.57596	1967
ENSMUSG00000030978	Rrm1	ribonucleotide reductase M1						52.4068	59.354	65.1647	70.1307	70.3092	64.0911	66.7821	73.5393	65.2222	2.39617	1968
ENSMUSG00000007836	Hnrnpa0	heterogeneous nuclear ribonucleoprotein A0						54.0916	67.8036	71.2524	77.5279	71.7035	58.1825	61.7146	59.3591	65.2044	2.8554	1969
ENSMUSG00000038005	Hpf1	histone PARylation factor 1						59.7882	62.1069	62.2704	61.4551	60.6189	71.1241	71.789	71.9994	65.144	1.92338	1970
ENSMUSG00000039682	Lap3	leucine aminopeptidase 3						47.826	55.4869	71.6006	71.3144	61.4054	66.9469	74.1792	72.3464	65.1382	3.33721	1971
ENSMUSG00000020107	Anapc16	anaphase promoting complex subunit 16						62.7106	62.6843	62.4445	62.8594	71.4325	68.9218	70.8704	59.0304	65.1193	1.6282	1972
ENSMUSG00000021018	Polr2h	polymerase (RNA) II (DNA directed) polypeptide H						61.5701	64.2043	65.4876	61.3766	68.5442	65.5637	67.8552	66.1741	65.097	0.926772	1973
ENSMUSG00000001018	Snapin	SNAP-associated protein						57.2574	60.2651	63.0913	63.4858	61.7141	72.2928	70.7686	71.5126	65.0485	2.01758	1974
ENSMUSG00000024515	Smad4	SMAD family member 4	MH1					57.1803	61.0723	58.8508	77.7045	72.7371	59.1922	69.8517	63.761	65.0437	2.65399	1975
ENSMUSG00000061461	Smim20	small integral membrane protein 20						65.7544	61.8085	64.6543	68.0399	63.7162	62.5259	66.3247	66.4284	64.9065	0.751308	1976
ENSMUSG00000025173	Wdr45b	WD repeat domain 45B						51.824	60.6749	69.3102	65.7467	71.8421	64.5589	66.9218	68.2304	64.8886	2.20586	1977
ENSMUSG00000021905	Dph3	diphthamine biosynthesis 3						59.0702	72.6068	62.7146	65.1947	66.8261	63.0628	62.1267	67.2931	64.8619	1.45612	1978
ENSMUSG00000079480	Pin4	protein (peptidyl-prolyl cis/trans isomerase) NIMA-interacting, 4 (parvulin)						70.977	66.4132	65.1485	58.2794	54.8919	71.2168	65.7484	65.8998	64.8219	2.00378	1979
ENSMUSG00000023791	Pigx	phosphatidylinositol glycan anchor biosynthesis, class X						54.989	64.3421	61.694	62.8562	67.7372	66.5581	65.6174	74.5032	64.7871	1.96591	1980
ENSMUSG00000028959	Fastk	Fas-activated serine/threonine kinase		Unclassified				50.212	62.0727	64.2091	73.4102	69.4501	63.1831	67.1888	68.3601	64.7608	2.45437	1981
ENSMUSG00000016495	Plgrkt	plasminogen receptor, C-terminal lysine transmembrane protein						59.3547	65.4851	58.2398	67.4886	67.5116	67.4423	63.9453	68.5997	64.7584	1.40073	1982
ENSMUSG00000100153	Ppp1ccb	protein phosphatase 1 catalytic subunit gamma B						66.6546	46.2318	61.5508	59.4748	48.0756	83.8963	72.1964	79.3765	64.6821	4.81547	1983
ENSMUSG00000004460	Dnajb11	DnaJ heat shock protein family (Hsp40) member B11						57.4354	61.5632	62.8829	69.959	67.378	63.9276	65.2963	68.9465	64.6736	1.46216	1984
ENSMUSG00000010362	Rdm1	RAD52 motif 1						59.9754	61.2745	64.6179	63.3259	70.0704	66.1921	65.0578	66.4784	64.624	1.12013	1985
ENSMUSG00000023015	Racgap1	Rac GTPase-activating protein 1						55.2087	58.5252	71.2371	65.743	70.8611	66.1884	63.3042	65.8539	64.6152	1.96136	1986
ENSMUSG00000020873	Slc35b1	solute carrier family 35, member B1			Solute carriers			53.9788	59.5964	66.9056	63.97	65.6138	68.761	68.4281	69.4306	64.5855	1.88929	1987
ENSMUSG00000006585	Cdt1	chromatin licensing and DNA replication factor 1						54.281	58.4423	63.571	66.5621	75.3861	62.4593	70.8449	64.8978	64.5556	2.35016	1988
ENSMUSG00000020821	Kif1c	kinesin family member 1C						57.1701	62.8247	67.4147	73.5477	65.0332	59.444	67.9794	63.0001	64.5517	1.82773	1989
ENSMUSG00000004451	Ralb	v-ral simian leukemia viral oncogene B						58.1187	57.9626	61.3625	59.2942	64.2802	73.3705	72.968	68.8631	64.5275	2.27515	1990
ENSMUSG00000042305	Tmem183a	transmembrane protein 183A						59.4864	57.0261	65.6585	65.7471	64.7394	74.0593	66.5733	62.7247	64.5019	1.80664	1991
ENSMUSG00000000787	Ddx3x	DEAD/H (Asp-Glu-Ala-Asp/His) box polypeptide 3, X-linked						54.8697	60.0113	66.4422	68.7589	59.9723	61.3898	70.6662	73.7791	64.4862	2.2721	1992
ENSMUSG00000024908	Ppp6r3	protein phosphatase 6, regulatory subunit 3						55.2892	58.599	68.4499	74.3742	62.9666	58.6518	67.2551	69.9977	64.448	2.34181	1993
ENSMUSG00000032254	Kif23	kinesin family member 23						55.8962	62.2597	64.4558	80.2357	64.814	58.3639	69.362	60.0203	64.426	2.69944	1994
ENSMUSG00000024539	Ptpn2	protein tyrosine phosphatase, non-receptor type 2						56.4664	57.0284	60.3483	58.5122	65.9282	69.9434	74.2366	72.3301	64.3492	2.53917	1995
ENSMUSG00000022771	Ppil2	peptidylprolyl isomerase (cyclophilin)-like 2						50.7277	59.8952	61.053	69.0774	77.8636	65.6197	66.2083	64.2868	64.3415	2.75913	1996
ENSMUSG00000017707	Serinc3	serine incorporator 3						55.2192	57.7259	63.8614	66.8821	66.9202	61.8293	72.4382	69.6526	64.3161	2.07187	1997
ENSMUSG00000041375	Ccdc9	coiled-coil domain containing 9						54.3513	54.3376	60.5005	74.6765	85.1177	61.4522	62.7883	61.196	64.3025	3.71709	1998
ENSMUSG00000027601	Mtfr1	mitochondrial fission regulator 1						55.1058	59.0746	66.4639	67.2146	64.7926	62.0938	70.788	68.8698	64.3004	1.85695	1999
[truncated: 51,355 more rows]

## Sheet: allTFs
Ensembl_gene_ID	Gene_symbol	Description	TFs	Mean (TPM)	S.E.M.	Rank
ENSMUSG00000028639	Ybx1	Y box protein 1	CSD	696.657	8.14219	211
ENSMUSG00000042406	Atf4	activating transcription factor 4	TF_bZIP	489.003	18.7759	269
ENSMUSG00000020644	Id2	inhibitor of DNA binding 2	bHLH	374.536	16.9949	328
ENSMUSG00000066551	Hmgb1	high mobility group box 1	HMG	339.558	19.3664	354
ENSMUSG00000046711	Hmga1	high mobility group AT-hook 1	HMGI/HMGY	331.421	3.85216	362
ENSMUSG00000025408	Ddit3	DNA-damage inducible transcript 3	TF_bZIP	326.835	7.51095	365
ENSMUSG00000001418	Glmp	glycosylated lysosomal membrane protein	NCU-G1	296.519	13.0737	397
ENSMUSG00000068823	Csde1	cold shock domain containing E1, RNA binding	CSD	291.035	8.49264	406
ENSMUSG00000022205	Sub1	SUB1 homolog (S. cerevisiae)	PC4	261.51	8.4749	458
ENSMUSG00000030189	Ybx3	Y box protein 3	CSD	251.962	2.63143	477
ENSMUSG00000022010	Tsc22d1	TSC22 domain family, member 1	TSC22	202.844	6.21986	592
ENSMUSG00000027067	Ssrp1	structure specific recognition protein 1	HMG	191.32	5.64129	628
ENSMUSG00000071076	Jund	jun D proto-oncogene	TF_bZIP	190.757	6.67986	631
ENSMUSG00000063659	Zbtb18	zinc finger and BTB domain containing 18	ZBTB	181.05	11.9528	666
ENSMUSG00000015714	Cers2	ceramide synthase 2	Homeobox	169.592	6.77866	718
ENSMUSG00000054717	Hmgb2	high mobility group box 2	HMG	159.008	6.41371	763
ENSMUSG00000022500	Litaf	LPS-induced TN factor	zf-LITAF-like	147.015	4.85556	822
ENSMUSG00000007415	Gatad1	GATA zinc finger domain containing 1	zf-GATA	139.244	2.25914	877
ENSMUSG00000037935	Smarce1	SWI/SNF related, matrix associated, actin dependent regulator of chromatin, subfamily e, member 1	HMG	136.541	5.32048	898
ENSMUSG00000052837	Junb	jun B proto-oncogene	TF_bZIP	130.54	6.1063	950
ENSMUSG00000029705	Cux1	cut-like homeobox 1	CUT	126.402	2.80461	979
ENSMUSG00000030103	Bhlhe40	basic helix-loop-helix family, member e40	bHLH	124.267	5.43367	1000
ENSMUSG00000038482	Tfdp1	transcription factor Dp 1	E2F	109.144	3.22172	1131
ENSMUSG00000026976	Pax8	paired box 8	PAX	107.531	2.99477	1152
ENSMUSG00000016503	Gtf3a	general transcription factor III A	zf-C2H2	103.736	1.68264	1198
ENSMUSG00000024695	Zfp91	zinc finger protein 91	zf-C2H2	101.756	2.85496	1222
ENSMUSG00000020232	Hmg20b	high mobility group 20B	HMG	97.2286	3.44081	1284
ENSMUSG00000035478	Mbd3	methyl-CpG binding domain protein 3	MBD	96.1775	3.48575	1297
ENSMUSG00000059552	Trp53	transformation related protein 53	P53	95.9539	3.07471	1303
ENSMUSG00000025498	Irf7	interferon regulatory factor 7	IRF	91.1228	2.45217	1379
ENSMUSG00000038539	Atf5	activating transcription factor 5	TF_bZIP	83.0311	3.75883	1543
ENSMUSG00000024513	Mbd2	methyl-CpG binding domain protein 2	MBD	81.3887	3.32726	1573
ENSMUSG00000018501	Ncor1	nuclear receptor co-repressor 1	MYB	80.8508	4.15565	1582
ENSMUSG00000071646	Mta2	metastasis-associated gene family, member 2	zf-GATA	79.9496	2.52625	1597
ENSMUSG00000024927	Rela	v-rel reticuloendotheliosis viral oncogene homolog A (avian)	RHD	79.3408	2.88703	1611
ENSMUSG00000023079	Gtf2ird1	general transcription factor II I repeat domain-containing 1	GTF2I	78.8179	3.32833	1626
ENSMUSG00000042745	Id1	inhibitor of DNA binding 1	bHLH	78.4009	3.06737	1633
ENSMUSG00000003923	Tfam	transcription factor A, mitochondrial	HMG	78.1628	4.0395	1640
ENSMUSG00000021144	Mta1	metastasis associated 1	zf-GATA	77.405	1.72164	1660
ENSMUSG00000038615	Nfe2l1	nuclear factor, erythroid derived 2,-like 1	TF_bZIP	74.6261	3.33207	1715
ENSMUSG00000008393	Carhsp1	calcium regulated heat stable protein 1	CSD	74.3185	1.30491	1726
ENSMUSG00000029014	Dnajc2	DnaJ heat shock protein family (Hsp40) member C2	MYB	74.0071	1.92498	1735
ENSMUSG00000026104	Stat1	signal transducer and activator of transcription 1	STAT	73.2716	1.92029	1751
ENSMUSG00000060261	Gtf2i	general transcription factor II I	GTF2I	73.1146	2.42232	1753
ENSMUSG00000012350	Ehf	ets homologous factor	ETS	71.9145	1.56587	1784
ENSMUSG00000034161	Scx	scleraxis	bHLH	71.9104	3.30253	1785
ENSMUSG00000025025	Mxi1	MAX interactor 1, dimerization protein	bHLH	71.6682	1.75418	1792
ENSMUSG00000058239	Usf2	upstream transcription factor 2	bHLH	69.8546	2.04032	1836
ENSMUSG00000022346	Myc	myelocytomatosis oncogene	bHLH	69.4832	2.7656	1851
ENSMUSG00000029178	Klf3	Kruppel-like factor 3 (basic)	zf-C2H2	68.8816	2.25417	1862
ENSMUSG00000003051	Elf3	E74-like factor 3	ETS	66.2155	1.15676	1935
ENSMUSG00000026641	Usf1	upstream transcription factor 1	bHLH	65.9035	3.85358	1949
ENSMUSG00000024515	Smad4	SMAD family member 4	MH1	65.0437	2.65399	1975
ENSMUSG00000059436	Max	Max protein	bHLH	63.9796	2.55748	2010
ENSMUSG00000020875	Hoxb9	homeobox B9	Homeobox	63.9172	1.54428	2013
ENSMUSG00000030796	Tead2	TEA domain family member 2	TEA	63.0217	2.70958	2039
ENSMUSG00000047407	Tgif1	TGFB-induced factor homeobox 1	Homeobox	62.5537	2.10935	2065
ENSMUSG00000023027	Atf1	activating transcription factor 1	TF_bZIP	62.1188	1.66189	2079
ENSMUSG00000022463	Srebf2	sterol regulatory element binding factor 2	bHLH	62.0322	1.80039	2081
ENSMUSG00000022895	Ets2	E26 avian leukemia oncogene 2, 3' domain	ETS	61.2303	1.46148	2099
ENSMUSG00000015839	Nfe2l2	nuclear factor, erythroid derived 2, like 2	TF_bZIP	60.2309	2.32571	2142
ENSMUSG00000021264	Yy1	YY1 transcription factor	zf-C2H2	58.178	1.94821	2214
ENSMUSG00000002393	Nr2f6	nuclear receptor subfamily 2, group F, member 6	RXR-like	58.1575	2.51349	2216
ENSMUSG00000020923	Ubtf	upstream binding transcription factor, RNA polymerase I	HMG	57.6272	1.89495	2241
ENSMUSG00000014859	E2f4	E2F transcription factor 4	E2F	57.3262	0.753193	2248
ENSMUSG00000026279	Thap4	THAP domain containing 4	THAP	57.2323	2.14419	2251
ENSMUSG00000030678	Maz	MYC-associated zinc finger protein (purine-binding transcription factor)	zf-C2H2	56.6188	2.44579	2270
ENSMUSG00000079215	Zfp664	zinc finger protein 664	zf-C2H2	56.5549	1.68978	2272
ENSMUSG00000042622	Maff	v-maf musculoaponeurotic fibrosarcoma oncogene family, protein F (avian)	TF_bZIP	56.2948	2.31054	2281
ENSMUSG00000051510	Mafg	v-maf musculoaponeurotic fibrosarcoma oncogene family, protein G (avian)	TF_bZIP	54.6134	1.71894	2351
ENSMUSG00000023021	Cers5	ceramide synthase 5	Homeobox	53.4304	1.32192	2408
ENSMUSG00000060601	Nr1h2	nuclear receptor subfamily 1, group H, member 2	THR-like	52.83	2.01743	2445
ENSMUSG00000028423	Nfx1	nuclear transcription factor, X-box binding 1	zf-NF-X1	52.106	2.33803	2485
ENSMUSG00000005698	Ctcf	CCCTC-binding factor	zf-C2H2	50.4527	1.63857	2578
ENSMUSG00000028163	Nfkb1	nuclear factor of kappa light polypeptide gene enhancer in B cells 1, p105	RHD	50.1415	1.5312	2593
ENSMUSG00000038418	Egr1	early growth response 1	zf-C2H2	49.7177	1.82565	2622
ENSMUSG00000056501	Cebpb	CCAAT/enhancer binding protein (C/EBP), beta	C/EBP	49.4791	3.53554	2640
ENSMUSG00000049470	Aff4	AF4/FMR2 family, member 4	AF-4	48.9877	2.34665	2664
ENSMUSG00000002996	Hbp1	high mobility group box transcription factor 1	HMG	47.8742	2.10975	2717
ENSMUSG00000015217	Hmgb3	high mobility group box 3	HMG	47.765	1.2133	2726
ENSMUSG00000058291	Zfp68	zinc finger protein 68	zf-C2H2	47.6945	1.85794	2733
ENSMUSG00000002325	Irf9	interferon regulatory factor 9	IRF	47.2835	1.63797	2751
ENSMUSG00000020538	Srebf1	sterol regulatory element binding transcription factor 1	bHLH	46.3005	1.15598	2805
ENSMUSG00000022556	Hsf1	heat shock factor 1	HSF	45.8527	1.88415	2831
ENSMUSG00000031885	Cbfb	core binding factor beta	CBF	45.0177	1.51089	2894
ENSMUSG00000038227	Hoxa9	homeobox A9	Homeobox	44.9771	2.28224	2896
ENSMUSG00000020167	Tcf3	transcription factor 3	bHLH	44.8772	1.34489	2906
ENSMUSG00000022760	Thap7	THAP domain containing 7	THAP	44.7275	1.39494	2920
ENSMUSG00000056758	Hmga2	high mobility group AT-hook 2	HMGI/HMGY	44.7141	1.93453	2923
ENSMUSG00000038909	Kat7	K(lysine) acetyltransferase 7	zf-C2HC	44.6793	1.8083	2927
ENSMUSG00000017801	Mlx	MAX-like protein X	bHLH	44.538	2.21896	2933
ENSMUSG00000025225	Nfkb2	nuclear factor of kappa light polypeptide gene enhancer in B cells 2, p49/p100	RHD	44.3033	1.43621	2950
ENSMUSG00000027552	E2f5	E2F transcription factor 5	E2F	44.2494	1.66007	2952
ENSMUSG00000046897	Zfp740	zinc finger protein 740	zf-C2H2	43.9838	1.01843	2970
ENSMUSG00000020679	Hnf1b	HNF1 homeobox B	Homeobox	42.9506	1.22881	3033
ENSMUSG00000001517	Foxm1	forkhead box M1	Fork head	42.8072	1.1703	3046
ENSMUSG00000018377	Vezf1	vascular endothelial zinc finger 1	zf-C2H2	41.4763	0.824217	3126
ENSMUSG00000031431	Tsc22d3	TSC22 domain family, member 3	TSC22	41.3356	1.29175	3139
ENSMUSG00000037174	Elf2	E74-like factor 2	ETS	40.493	1.5235	3209
ENSMUSG00000095362	Gm14325	predicted gene 14325	zf-C2H2	39.9431	2.99238	3251
ENSMUSG00000039191	Rbpj	recombination signal binding protein for immunoglobulin kappa J region	CSL	39.582	1.22464	3274
ENSMUSG00000000078	Klf6	Kruppel-like factor 6	zf-C2H2	39.4539	1.29282	3281
ENSMUSG00000039068	Zzz3	zinc finger, ZZ domain containing 3	MYB	39.3155	1.08497	3291
ENSMUSG00000015522	Arnt	aryl hydrocarbon receptor nuclear translocator	bHLH	39.1391	1.46105	3304
ENSMUSG00000056216	Cebpg	CCAAT/enhancer binding protein (C/EBP), gamma	C/EBP	38.4648	1.49425	3352
ENSMUSG00000023932	Cdc5l	cell division cycle 5-like (S. pombe)	MYB	38.4342	1.21355	3353
ENSMUSG00000023994	Nfya	nuclear transcription factor-Y alpha	NF-YA	37.8024	1.69995	3390
ENSMUSG00000003184	Irf3	interferon regulatory factor 3	IRF	37.5575	1.72204	3408
ENSMUSG00000029478	Ncor2	nuclear receptor co-repressor 2	MYB	37.1687	1.94273	3441
ENSMUSG00000024563	Smad2	SMAD family member 2	MH1	36.5666	0.871343	3478
ENSMUSG00000037017	Zscan21	zinc finger and SCAN domain containing 21	zf-C2H2	36.4333	1.48122	3489
ENSMUSG00000051451	Crebzf	CREB/ATF bZIP transcription factor	TF_bZIP	35.6455	1.00391	3551
ENSMUSG00000066613	Zfp932	zinc finger protein 932	zf-C2H2	35.4944	2.04727	3563
ENSMUSG00000058440	Nrf1	nuclear respiratory factor 1	Nrf1	35.3368	1.36717	3575
ENSMUSG00000042063	Zfp386	zinc finger protein 386 (Kruppel-like)	zf-C2H2	35.0224	1.2326	3600
ENSMUSG00000002147	Stat6	signal transducer and activator of transcription 6	STAT	34.5497	1.16989	3648
ENSMUSG00000022528	Hes1	hes family bHLH transcription factor 1	bHLH	34.3992	1.26181	3666
ENSMUSG00000000690	Hoxb6	homeobox B6	Homeobox	34.1378	1.30592	3688
ENSMUSG00000008976	Gabpa	GA repeat binding protein, alpha	ETS	34.0853	0.936972	3695
ENSMUSG00000040033	Stat2	signal transducer and activator of transcription 2	STAT	34.0449	1.80888	3699
ENSMUSG00000024561	Mbd1	methyl-CpG binding domain protein 1	MBD	33.7202	0.698517	3729
ENSMUSG00000004040	Stat3	signal transducer and activator of transcription 3	STAT	33.5556	0.939654	3753
ENSMUSG00000022811	Zfp148	zinc finger protein 148	zf-C2H2	33.5198	1.2795	3757
ENSMUSG00000004934	Pias4	protein inhibitor of activated STAT 4	zf-MIZ	33.4793	1.60808	3758
ENSMUSG00000027667	Zfp639	zinc finger protein 639	zf-C2H2	33.4734	1.66867	3761
ENSMUSG00000072889	Nfxl1	nuclear transcription factor, X-box binding-like 1	zf-NF-X1	33.4714	1.04324	3762
ENSMUSG00000020484	Xbp1	X-box binding protein 1	TF_bZIP	32.7965	1.11229	3812
ENSMUSG00000037465	Klf10	Kruppel-like factor 10	zf-C2H2	32.6118	1.33369	3826
ENSMUSG00000032481	Smarcc1	SWI/SNF related, matrix associated, actin dependent regulator of chromatin, subfamily c, member 1	MYB	32.5903	1.15834	3828
ENSMUSG00000037730	Mynn	myoneurin	ZBTB	32.5897	1.95776	3829
ENSMUSG00000028042	Zbtb7b	zinc finger and BTB domain containing 7B	ZBTB	32.3831	1.66491	3848
ENSMUSG00000025369	Smarcc2	SWI/SNF related, matrix associated, actin dependent regulator of chromatin, subfamily c, member 2	MYB	32.185	1.1938	3872
ENSMUSG00000038346	Zfp384	zinc finger protein 384	zf-C2H2	31.9485	0.923338	3901
ENSMUSG00000026638	Irf6	interferon regulatory factor 6	IRF	31.9192	1.60177	3903
ENSMUSG00000028101	Pias3	protein inhibitor of activated STAT 3	zf-MIZ	31.7157	1.42903	3924
ENSMUSG00000076431	Sox4	SRY (sex determining region Y)-box 4	HMG	31.6876	1.18496	3930
ENSMUSG00000026628	Atf3	activating transcription factor 3	TF_bZIP	31.6042	0.744114	3940
ENSMUSG00000027104	Atf2	activating transcription factor 2	TF_bZIP	31.4046	0.83118	3958
ENSMUSG00000027109	Sp3	trans-acting transcription factor 3	zf-C2H2	31.165	0.894706	3982
ENSMUSG00000037896	Rcor1	REST corepressor 1	MYB	31.0869	1.09327	3995
ENSMUSG00000039275	Foxk2	forkhead box K2	Fork head	30.9586	1.62975	4010
ENSMUSG00000042472	Zfp410	zinc finger protein 410	zf-C2H2	30.9183	1.25683	4013
ENSMUSG00000024955	Esrra	estrogen related receptor, alpha	ESR-like	30.9091	0.862543	4016
ENSMUSG00000014303	Glis2	GLIS family zinc finger 2	zf-C2H2	30.8474	1.32377	4020
ENSMUSG00000007872	Id3	inhibitor of DNA binding 3	bHLH	30.6864	1.38259	4041
ENSMUSG00000042508	Dmtf1	cyclin D binding myb-like transcription factor 1	MYB	30.651	1.30206	4052
ENSMUSG00000003847	Nfat5	nuclear factor of activated T cells 5	RHD	30.4171	1.82347	4071
ENSMUSG00000020472	Zkscan17	zinc finger with KRAB and SCAN domains 17	zf-C2H2	30.4089	0.948156	4073
ENSMUSG00000055320	Tead1	TEA domain family member 1	TEA	30.2825	1.37535	4094
ENSMUSG00000067071	Hes6	hairy and enhancer of split 6	bHLH	30.1597	1.08757	4106
ENSMUSG00000030180	Kdm5a	lysine (K)-specific demethylase 5A	ARID	30.0546	1.03395	4119
ENSMUSG00000049295	Zfp219	zinc finger protein 219	zf-C2H2	29.7427	1.02018	4148
ENSMUSG00000032228	Tcf12	transcription factor 12	bHLH	29.7253	1.09272	4152
ENSMUSG00000005442	Cic	capicua transcriptional repressor	HMG	29.6757	2.23223	4158
ENSMUSG00000028466	Creb3	cAMP responsive element binding protein 3	TF_bZIP	29.6686	1.98961	4160
ENSMUSG00000014592	Camta1	calmodulin binding transcription activator 1	CG-1	29.1777	1.39921	4235
ENSMUSG00000062761	Zfp512	zinc finger protein 512	zf-C2H2	29.0347	1.14062	4249
ENSMUSG00000034430	Zxdc	ZXD family zinc finger C	zf-C2H2	28.9712	2.01937	4262
ENSMUSG00000043059	Zfp513	zinc finger protein 513	zf-C2H2	28.9512	1.40093	4264
ENSMUSG00000001288	Rarg	retinoic acid receptor, gamma	THR-like	28.7837	1.29943	4283
ENSMUSG00000025925	Terf1	telomeric repeat binding factor 1	MYB	28.7687	1.03346	4285
ENSMUSG00000007812	Zfp655	zinc finger protein 655	zf-C2H2	28.6622	0.745642	4296
ENSMUSG00000017724	Etv4	ets variant 4	ETS	28.2733	0.906498	4346
ENSMUSG00000015605	Srf	serum response factor	SRF	28.1856	1.8652	4357
ENSMUSG00000005148	Klf5	Kruppel-like factor 5	zf-C2H2	28.0822	0.676242	4373
ENSMUSG00000055817	Mta3	metastasis associated 3	zf-GATA	27.8758	1.12433	4416
ENSMUSG00000039656	Rxrb	retinoid X receptor beta	RXR-like	27.8393	0.958399	4419
ENSMUSG00000038721	Hoxb7	homeobox B7	Homeobox	27.5862	0.974229	4445
ENSMUSG00000042390	Gatad2b	GATA zinc finger domain containing 2B	zf-GATA	27.2977	0.576552	4482
ENSMUSG00000019338	Zfp687	zinc finger protein 687	zf-C2H2	27.0754	0.830898	4505
ENSMUSG00000047036	Zfp445	zinc finger protein 445	zf-C2H2	26.6167	1.06353	4561
ENSMUSG00000031627	Irf2	interferon regulatory factor 2	IRF	26.4053	1.06688	4584
ENSMUSG00000020453	Patz1	POZ (BTB) and AT hook containing zinc finger 1	ZBTB	26.3248	1.11611	4598
ENSMUSG00000032897	Nfyc	nuclear transcription factor-Y gamma	NF-YC	26.3182	1.0666	4602
ENSMUSG00000001280	Sp1	trans-acting transcription factor 1	zf-C2H2	26.274	0.749719	4605
ENSMUSG00000009741	Ubp1	upstream binding protein 1	CP2	26.1069	1.18385	4624
ENSMUSG00000018899	Irf1	interferon regulatory factor 1	IRF	25.6367	0.999081	4683
ENSMUSG00000015697	Setdb1	SET domain, bifurcated 1	MBD	25.58	0.796006	4690
ENSMUSG00000034673	Pbx2	pre B cell leukemia homeobox 2	Homeobox	25.359	0.822516	4718
ENSMUSG00000059689	Zfp637	zinc finger protein 637	zf-C2H2	24.8872	0.920489	4786
ENSMUSG00000020248	Nfyb	nuclear transcription factor-Y beta	NF-YB	24.7012	0.801036	4816
ENSMUSG00000040054	Baz2a	bromodomain adjacent to zinc finger domain, 2A	MBD	24.6283	0.99957	4832
ENSMUSG00000022286	Grhl2	grainyhead like transcription factor 2	CP2	24.6264	0.862713	4833
ENSMUSG00000030232	Aebp2	AE binding protein 2	zf-C2H2	24.598	0.92274	4837
ENSMUSG00000034271	Jdp2	Jun dimerization protein 2	TF_bZIP	24.5771	1.00097	4844
ENSMUSG00000039759	Thap3	THAP domain containing, apoptosis associated protein 3	THAP	24.4859	1.30385	4860
ENSMUSG00000025423	Pias2	protein inhibitor of activated STAT 2	zf-MIZ	24.3266	0.934332	4884
ENSMUSG00000036461	Elf1	E74-like factor 1	ETS	24.3127	0.584554	4885
ENSMUSG00000040857	Erf	Ets2 repressor factor	ETS	24.1803	0.892256	4903
ENSMUSG00000001419	Mef2d	myocyte enhancer factor 2D	SRF	24.1173	0.83713	4911
ENSMUSG00000068551	Zfp467	zinc finger protein 467	zf-C2H2	23.7694	0.678012	4976
ENSMUSG00000029135	Fosl2	fos-like antigen 2	TF_bZIP	23.7483	0.610061	4982
ENSMUSG00000035529	Prdm4	PR domain containing 4	zf-C2H2	23.2081	0.888964	5053
ENSMUSG00000046792	Zfp787	zinc finger protein 787	zf-C2H2	23.0816	0.523215	5074
ENSMUSG00000032402	Smad3	SMAD family member 3	MH1	23.0421	0.779768	5080
ENSMUSG00000024050	Wiz	widely-interspaced zinc finger motifs	zf-C2H2	22.915	0.99716	5100
ENSMUSG00000024431	Nr3c1	nuclear receptor subfamily 3, group C, member 1	ESR-like	22.8715	0.500277	5105
ENSMUSG00000004071	Cdip1	cell death inducing Trp53 target 1	zf-LITAF-like	22.7344	0.678028	5121
ENSMUSG00000023991	Foxp4	forkhead box P4	Fork head	22.6307	0.813075	5129
ENSMUSG00000024912	Fosl1	fos-like antigen 1	TF_bZIP	22.2553	0.79069	5174
ENSMUSG00000039852	Rere	arginine glutamic acid dipeptide (RE) repeats	zf-GATA	22.1538	1.06774	5186
ENSMUSG00000034518	Hmgxb4	HMG box domain containing 4	HMG	21.945	0.835588	5216
ENSMUSG00000042323	Pbrm1	polybromo 1	HMG	21.9215	0.805168	5220
ENSMUSG00000044934	Zfp367	zinc finger protein 367	zf-C2H2	21.8427	0.927268	5237
ENSMUSG00000094870	Zfp131	zinc finger protein 131	ZBTB	21.6944	0.554751	5264
ENSMUSG00000015461	Atf6b	activating transcription factor 6 beta	TF_bZIP	21.4458	1.11196	5306
ENSMUSG00000075588	Hoxb2	homeobox B2	Homeobox	21.41	0.861724	5312
ENSMUSG00000049755	Zfp672	zinc finger protein 672	zf-C2H2	21.4056	1.17829	5313
ENSMUSG00000052942	Glis3	GLIS family zinc finger 3	zf-C2H2	21.3971	1.15116	5316
ENSMUSG00000099083	Atf7	activating transcription factor 7	TF_bZIP	21.3742	1.15128	5319
ENSMUSG00000036442	Thap11	THAP domain containing 11	THAP	21.3553	0.765579	5325
ENSMUSG00000047264	Zfp358	zinc finger protein 358	zf-C2H2	21.3354	0.430197	5330
ENSMUSG00000059824	Dbp	D site albumin promoter binding protein	TF_bZIP	21.2836	0.649504	5338
ENSMUSG00000058886	Deaf1	DEAF1, transcription factor	SAND	21.2497	0.852357	5344
ENSMUSG00000051149	Adnp	activity-dependent neuroprotective protein	Homeobox	21.1424	1.16349	5361
ENSMUSG00000024317	Rnf138	ring finger protein 138	zf-MIZ	21.048	0.798934	5370
ENSMUSG00000025332	Kdm5c	lysine (K)-specific demethylase 5C	ARID	20.9232	1.00837	5391
ENSMUSG00000026987	Baz2b	bromodomain adjacent to zinc finger domain, 2B	MBD	20.8992	0.659075	5398
ENSMUSG00000004231	Pax2	paired box 2	PAX	20.8152	0.999052	5412
ENSMUSG00000041164	Zmiz2	zinc finger, MIZ-type containing 2	zf-MIZ	20.6811	0.74222	5432
ENSMUSG00000066880	Zfp617	zinc finger protein 617	zf-C2H2	20.6756	1.05937	5434
ENSMUSG00000021775	Nr1d2	nuclear receptor subfamily 1, group D, member 2	THR-like	20.5421	0.826038	5472
ENSMUSG00000021972	Hmbox1	homeobox containing 1	Homeobox	20.3865	0.872114	5499
ENSMUSG00000033863	Klf9	Kruppel-like factor 9	zf-C2H2	20.3371	0.819508	5515
ENSMUSG00000038705	Gmeb2	glucocorticoid modulatory element binding protein 2	SAND	20.2949	0.744353	5527
ENSMUSG00000024276	Zfp397	zinc finger protein 397	zf-C2H2	20.1861	0.632145	5545
ENSMUSG00000033943	Mga	MAX gene associated	T-box	20.0898	1.04831	5567
ENSMUSG00000026436	Elk4	ELK4, member of ETS oncogene family	ETS	20.0413	1.78399	5577
ENSMUSG00000000938	Hoxa10	homeobox A10	Homeobox	19.7508	0.487834	5620
ENSMUSG00000018651	Tada2a	transcriptional adaptor 2A	MYB	19.6888	0.944104	5636
ENSMUSG00000052534	Pbx1	pre B cell leukemia homeobox 1	Homeobox	19.6815	0.601442	5638
ENSMUSG00000030557	Mef2a	myocyte enhancer factor 2A	SRF	19.6091	0.651681	5646
ENSMUSG00000037029	Zfp146	zinc finger protein 146	zf-C2H2	19.4543	0.990403	5678
ENSMUSG00000027490	E2f1	E2F transcription factor 1	E2F	19.4251	0.728029	5680
ENSMUSG00000071477	Zfp777	zinc finger protein 777	zf-C2H2	19.2423	1.11337	5711
ENSMUSG00000029313	Aff1	AF4/FMR2 family, member 1	AF-4	19.2343	0.883382	5716
ENSMUSG00000054648	Zfp869	zinc finger protein 869	zf-C2H2	19.2046	0.664375	5722
ENSMUSG00000072762	4930522L14Rik	RIKEN cDNA 4930522L14 gene	zf-C2H2	19.1277	1.05111	5734
ENSMUSG00000060427	Zfp868	zinc finger protein 868	zf-C2H2	18.8675	0.48909	5775
ENSMUSG00000002983	Relb	avian reticuloendotheliosis viral (v-rel) oncogene related B	RHD	18.8148	0.472576	5787
ENSMUSG00000049421	Zfp260	zinc finger protein 260	zf-C2H2	18.3049	0.645726	5884
ENSMUSG00000017861	Mybl2	myeloblastosis oncogene-like 2	MYB	18.3022	0.776616	5885
ENSMUSG00000035011	Zbtb7a	zinc finger and BTB domain containing 7a	ZBTB	18.278	0.700661	5894
ENSMUSG00000028901	Gmeb1	glucocorticoid modulatory element binding protein 1	SAND	18.2573	0.691994	5898
ENSMUSG00000007880	Arid1a	AT rich interactive domain 1A (SWI-like)	ARID	18.1937	0.78309	5912
ENSMUSG00000027551	Zfp64	zinc finger protein 64	zf-C2H2	18.0978	0.551557	5932
ENSMUSG00000042207	Kdm5b	lysine (K)-specific demethylase 5B	ARID	17.9617	0.366147	5971
ENSMUSG00000001521	Tulp3	tubby-like protein 3	Tub	17.9353	0.814738	5982
ENSMUSG00000033669	Zfp7	zinc finger protein 7	zf-C2H2	17.8814	0.599182	5992
ENSMUSG00000036281	Snapc4	small nuclear RNA activating complex, polypeptide 4	MYB	17.8011	1.05961	6024
ENSMUSG00000035397	Klf16	Kruppel-like factor 16	zf-C2H2	17.7946	0.613326	6025
ENSMUSG00000070643	Sox13	SRY (sex determining region Y)-box 13	HMG	17.7713	0.62102	6032
ENSMUSG00000099032	Tcf24	transcription factor 24	bHLH	17.7706	0.668112	6033
ENSMUSG00000025880	Smad7	SMAD family member 7	MH1	17.7204	0.657124	6040
ENSMUSG00000018143	Mafk	v-maf musculoaponeurotic fibrosarcoma oncogene family, protein K (avian)	TF_bZIP	17.701	0.452121	6046
ENSMUSG00000059897	Zfp930	zinc finger protein 930	zf-C2H2	17.6392	1.2302	6057
ENSMUSG00000027806	Tsc22d2	TSC22 domain family, member 2	TSC22	17.6239	0.708587	6062
ENSMUSG00000056673	Kdm5d	lysine (K)-specific demethylase 5D	ARID	17.6227	0.736073	6063
ENSMUSG00000052684	Jun	jun proto-oncogene	TF_bZIP	17.6156	0.599255	6066
ENSMUSG00000005897	Nr2c1	nuclear receptor subfamily 2, group C, member 1	RXR-like	17.5612	0.38782	6077
ENSMUSG00000052751	Repin1	replication initiator 1	zf-C2H2	17.4587	0.419429	6098
ENSMUSG00000055053	Nfic	nuclear factor I/C	CTF/NFI	17.451	0.532088	6101
ENSMUSG00000037395	Rcor3	REST corepressor 3	MYB	17.406	0.691501	6109
ENSMUSG00000021327	Zkscan3	zinc finger with KRAB and SCAN domains 3	zf-C2H2	17.3762	0.643194	6115
ENSMUSG00000038718	Pbx3	pre B cell leukemia homeobox 3	Homeobox	17.2889	0.575779	6134
ENSMUSG00000030067	Foxp1	forkhead box P1	Fork head	17.1817	0.45274	6152
ENSMUSG00000020889	Nr1d1	nuclear receptor subfamily 1, group D, member 1	THR-like	17.1216	1.31785	6169
ENSMUSG00000039841	Zfp800	zinc finger protein 800	zf-C2H2	17.0463	0.861784	6186
ENSMUSG00000059878	Zfp422	zinc finger protein 422	zf-C2H2	16.8197	0.605492	6241
ENSMUSG00000051367	Six1	sine oculis-related homeobox 1	Homeobox	16.7985	0.516465	6246
ENSMUSG00000005718	Tfap4	transcription factor AP4	bHLH	16.742	0.677073	6263
ENSMUSG00000025019	Lcor	ligand dependent nuclear receptor corepressor	HTH	16.7386	0.647111	6264
ENSMUSG00000034377	Tulp4	tubby like protein 4	Tub	16.68	0.46077	6279
ENSMUSG00000037992	Rara	retinoic acid receptor, alpha	THR-like	16.6757	0.577604	6283
ENSMUSG00000048756	Foxo3	forkhead box O3	Fork head	16.5755	0.653152	6310
ENSMUSG00000032998	Foxj3	forkhead box J3	Fork head	16.5134	0.482489	6327
ENSMUSG00000022389	Tef	thyrotroph embryonic factor	TF_bZIP	16.4983	0.687734	6333
ENSMUSG00000024220	Zfp523	zinc finger protein 523	zf-C2H2	16.4514	0.844141	6344
ENSMUSG00000061374	Fiz1	Flt3 interacting zinc finger protein 1	zf-C2H2	16.4013	0.60224	6354
ENSMUSG00000037243	Zfp692	zinc finger protein 692	zf-C2H2	16.3836	0.902619	6360
ENSMUSG00000032035	Ets1	E26 avian leukemia oncogene 1, 5' domain	ETS	16.2226	0.412639	6396
ENSMUSG00000022529	Zfp263	zinc finger protein 263	zf-C2H2	16.2115	0.569459	6398
ENSMUSG00000031921	Terf2	telomeric repeat binding factor 2	MYB	16.1526	0.38411	6411
ENSMUSG00000024622	Hmgxb3	HMG box domain containing 3	HMG	16.0688	0.61313	6431
ENSMUSG00000016831	Tox4	TOX high mobility group box family member 4	HMG	15.9464	0.76221	6464
ENSMUSG00000031902	Nfatc3	nuclear factor of activated T cells, cytoplasmic, calcineurin dependent 3	RHD	15.8148	0.521451	6492
ENSMUSG00000006215	Zbtb17	zinc finger and BTB domain containing 17	ZBTB	15.7593	0.669272	6500
ENSMUSG00000061079	Zfp143	zinc finger protein 143	zf-C2H2	15.6882	0.595689	6520
ENSMUSG00000046962	Zbtb21	zinc finger and BTB domain containing 21	ZBTB	15.683	0.779908	6521
ENSMUSG00000008398	Elk3	ELK3, member of ETS oncogene family	ETS	15.6753	0.560951	6523
ENSMUSG00000050295	Foxc1	forkhead box C1	Fork head	15.5567	0.648548	6543
ENSMUSG00000029196	Tada2b	transcriptional adaptor 2B	MYB	15.1647	0.43909	6632
ENSMUSG00000045251	Zfp688	zinc finger protein 688	zf-C2H2	15.0875	0.305621	6643
ENSMUSG00000022641	Bbx	bobby sox HMG box containing	HMG	14.8878	0.527686	6686
ENSMUSG00000043969	Emx2	empty spiracles homeobox 2	Homeobox	14.8669	0.888559	6694
ENSMUSG00000025958	Creb1	cAMP responsive element binding protein 1	TF_bZIP	14.8587	0.488278	6695
ENSMUSG00000000134	Tfe3	transcription factor E3	bHLH	14.7761	0.109115	6715
ENSMUSG00000046311	Zfp62	zinc finger protein 62	zf-C2H2	14.6717	0.565819	6733
ENSMUSG00000026663	Atf6	activating transcription factor 6	TF_bZIP	14.6266	0.486214	6744
ENSMUSG00000063245	Zfp993	zinc finger protein 993	zf-C2H2	14.5004	1.12779	6771
ENSMUSG00000057982	Zfp809	zinc finger protein 809	zf-C2H2	14.4889	0.406991	6774
ENSMUSG00000001504	Irx2	Iroquois homeobox 2	Homeobox	14.4676	0.577505	6777
ENSMUSG00000026222	Sp100	nuclear antigen Sp100	SAND	14.4227	0.607713	6788
ENSMUSG00000031734	Irx3	Iroquois related homeobox 3	Homeobox	14.3	0.555175	6813
ENSMUSG00000053477	Tcf4	transcription factor 4	bHLH	14.0808	0.507255	6861
ENSMUSG00000051184	Zfp524	zinc finger protein 524	zf-C2H2	14.0352	0.453533	6871
ENSMUSG00000063281	Zfp35	zinc finger protein 35	zf-C2H2	13.8006	0.563575	6934
ENSMUSG00000002265	Peg3	paternally expressed 3	zf-C2H2	13.7861	0.86058	6935
ENSMUSG00000057101	Zfp180	zinc finger protein 180	zf-C2H2	13.5044	0.724608	7013
ENSMUSG00000024137	E4f1	E4F transcription factor 1	zf-C2H2	13.4961	0.991325	7016
ENSMUSG00000032329	Hmg20a	high mobility group 20A	HMG	13.4272	0.331182	7028
ENSMUSG00000009739	Pou6f1	POU domain, class 6, transcription factor 1	Pou	13.427	1.19846	7030
ENSMUSG00000018554	Ybx2	Y box protein 2	CSD	13.3316	0.973929	7059
ENSMUSG00000070420	Zscan25	zinc finger and SCAN domain containing 25	zf-C2H2	13.2108	0.395512	7093
ENSMUSG00000039219	Arid4b	AT rich interactive domain 4B (RBP1-like)	ARID	13.1915	0.490316	7097
ENSMUSG00000032119	Hinfp	histone H4 transcription factor	zf-C2H2	13.1728	0.46179	7106
ENSMUSG00000037572	Wdhd1	WD repeat and HMG-box DNA binding protein 1	HMG	12.8744	0.570763	7184
ENSMUSG00000024922	Ovol1	ovo like zinc finger 1	zf-C2H2	12.8037	0.267008	7209
ENSMUSG00000075595	Zfp652	zinc finger protein 652	zf-C2H2	12.7441	0.384965	7224
ENSMUSG00000049878	Rlf	rearranged L-myc fusion sequence	zf-C2H2	12.7284	0.308268	7235
ENSMUSG00000057691	Zfp746	zinc finger protein 746	zf-C2H2	12.7067	0.492406	7237
ENSMUSG00000043090	Zfp866	zinc finger protein 866	zf-C2H2	12.633	0.30723	7256
ENSMUSG00000026803	Ttf1	transcription termination factor, RNA polymerase I	MYB	12.6227	0.84731	7260
ENSMUSG00000046179	E2f8	E2F transcription factor 8	E2F	12.5596	0.353399	7279
ENSMUSG00000050846	Zfp623	zinc finger protein 623	zf-C2H2	12.4648	0.515122	7298
ENSMUSG00000044876	Zfp444	zinc finger protein 444	zf-C2H2	12.4643	0.712653	7301
ENSMUSG00000009733	Tfcp2	transcription factor CP2	CP2	12.3987	0.702098	7323
ENSMUSG00000055835	Zfp1	zinc finger protein 1	zf-C2H2	12.3197	0.344644	7341
ENSMUSG00000067931	Zfp948	zinc finger protein 948	zf-C2H2	12.3069	0.342645	7343
ENSMUSG00000031681	Smad1	SMAD family member 1	MH1	12.2643	0.472943	7361
ENSMUSG00000056493	Foxk1	forkhead box K1	Fork head	12.2346	0.396826	7371
ENSMUSG00000056749	Nfil3	nuclear factor, interleukin 3, regulated	TF_bZIP	12.2155	0.494746	7378
ENSMUSG00000022952	Runx1	runt related transcription factor 1	Runt	12.2024	0.646761	7380
ENSMUSG00000039834	Zfp335	zinc finger protein 335	zf-C2H2	12.1388	0.596737	7399
ENSMUSG00000002249	Tead3	TEA domain family member 3	TEA	12.0793	0.424144	7414
ENSMUSG00000052763	Zfp212	Zinc finger protein 212	zf-C2H2	12.0515	0.521889	7425
ENSMUSG00000040433	Zbtb38	zinc finger and BTB domain containing 38	ZBTB	12.0479	0.724377	7426
ENSMUSG00000041515	Irf8	interferon regulatory factor 8	IRF	12.0421	0.442227	7428
ENSMUSG00000026740	Dnajc1	DnaJ heat shock protein family (Hsp40) member C1	MYB	12.0048	0.687558	7441
ENSMUSG00000028150	Rorc	RAR-related orphan receptor gamma	THR-like	11.9488	0.251114	7455
ENSMUSG00000015882	Lcorl	ligand dependent nuclear receptor corepressor-like	HTH	11.9409	0.674482	7457
ENSMUSG00000058756	Thra	thyroid hormone receptor alpha	THR-like	11.9344	0.421803	7460
ENSMUSG00000074865	Zfp934	zinc finger protein 934	zf-C2H2	11.9246	0.558309	7470
ENSMUSG00000057409	Zfp53	zinc finger protein 53	zf-C2H2	11.9193	0.419628	7473
ENSMUSG00000015846	Rxra	retinoid X receptor alpha	RXR-like	11.8609	0.470568	7488
ENSMUSG00000007817	Zmiz1	zinc finger, MIZ-type containing 1	zf-MIZ	11.8365	0.604799	7493
ENSMUSG00000022228	Zscan26	zinc finger and SCAN domain containing 26	zf-C2H2	11.7199	0.349594	7520
ENSMUSG00000037214	Thap1	THAP domain containing, apoptosis associated protein 1	THAP	11.6898	0.493346	7526
ENSMUSG00000057469	E2f6	E2F transcription factor 6	E2F	11.633	0.585492	7552
ENSMUSG00000051341	Zfp52	zinc finger protein 52	zf-C2H2	11.6328	0.418222	7553
ENSMUSG00000069729	Arid1b	AT rich interactive domain 1B (SWI-like)	ARID	11.6128	0.497315	7561
ENSMUSG00000025612	Bach1	BTB and CNC homology 1, basic leucine zipper transcription factor 1	TF_bZIP	11.6116	0.41073	7562
ENSMUSG00000020919	Stat5b	signal transducer and activator of transcription 5B	STAT	11.5114	0.535521	7597
ENSMUSG00000021540	Smad5	SMAD family member 5	MH1	11.499	0.543326	7604
ENSMUSG00000046982	Tshz1	teashirt zinc finger family member 1	zf-C2H2	11.4602	0.406245	7613
ENSMUSG00000056648	Hoxb8	homeobox B8	Homeobox	11.439	0.724627	7622
ENSMUSG00000032405	Pias1	protein inhibitor of activated STAT 1	zf-MIZ	11.4261	0.60939	7624
ENSMUSG00000075040	Zfp408	zinc finger protein 408	zf-C2H2	11.414	0.487632	7628
ENSMUSG00000005893	Nr2c2	nuclear receptor subfamily 2, group C, member 2	RXR-like	11.3338	0.43435	7651
ENSMUSG00000039967	Zfp292	zinc finger protein 292	zf-C2H2	11.3251	0.422375	7658
ENSMUSG00000058638	Zfp110	zinc finger protein 110	zf-C2H2	11.2817	0.46883	7673
ENSMUSG00000060510	Zfp266	zinc finger protein 266	zf-C2H2	11.268	0.832099	7678
ENSMUSG00000021359	Tfap2a	transcription factor AP-2, alpha	AP-2	11.262	0.475638	7681
ENSMUSG00000033237	Arid2	AT rich interactive domain 2 (ARID, RFX-like)	ARID	11.2354	0.363743	7692
ENSMUSG00000090963	Gm17655	predicted gene, 17655	zf-C2H2	11.0961	2.24618	7736
ENSMUSG00000032411	Tfdp2	transcription factor Dp 2	E2F	11.0464	0.441237	7745
ENSMUSG00000029729	Zkscan1	zinc finger with KRAB and SCAN domains 1	zf-C2H2	10.9977	0.412279	7760
ENSMUSG00000060969	Irx1	Iroquois homeobox 1	Homeobox	10.9864	0.802484	7762
ENSMUSG00000049823	Zbtb12	zinc finger and BTB domain containing 12	ZBTB	10.9595	0.571181	7771
ENSMUSG00000002250	Ppard	peroxisome proliferator activator receptor delta	THR-like	10.9363	0.592751	7779
ENSMUSG00000029238	Clock	circadian locomotor output cycles kaput	bHLH	10.9299	0.420663	7783
ENSMUSG00000047371	Zfp768	zinc finger protein 768	zf-C2H2	10.9164	0.545299	7786
ENSMUSG00000003382	Etv3	ets variant 3	ETS	10.8875	0.315062	7793
ENSMUSG00000031706	Rfx1	regulatory factor X, 1 (influences HLA class II expression)	RFX	10.8079	0.462253	7817
ENSMUSG00000054716	Zfp771	zinc finger protein 771	zf-C2H2	10.7839	0.706124	7823
ENSMUSG00000022508	Bcl6	B cell leukemia/lymphoma 6	ZBTB	10.7545	0.483272	7830
ENSMUSG00000008575	Nfib	nuclear factor I/B	CTF/NFI	10.7538	0.469859	7831
ENSMUSG00000056459	Zbtb25	zinc finger and BTB domain containing 25	ZBTB	10.7199	0.453133	7838
ENSMUSG00000034429	Zfp707	zinc finger protein 707	zf-C2H2	10.544	0.476725	7888
ENSMUSG00000039087	Rreb1	ras responsive element binding protein 1	zf-C2H2	10.4902	0.708593	7901
ENSMUSG00000028358	Zfp618	zinc finger protein 618	zf-C2H2	10.3639	1.23052	7929
ENSMUSG00000063889	Crem	cAMP responsive element modulator	TF_bZIP	10.2861	0.186371	7954
ENSMUSG00000058748	Zfp958	zinc finger protein 958	zf-C2H2	10.2853	0.535556	7955
ENSMUSG00000051977	Prdm9	PR domain containing 9	zf-C2H2	10.2742	0.643165	7958
ENSMUSG00000055116	Arntl	aryl hydrocarbon receptor nuclear translocator-like	bHLH	10.2569	0.268411	7964
ENSMUSG00000041258	Zfp236	zinc finger protein 236	zf-C2H2	10.1141	0.487791	8013
ENSMUSG00000027439	Gzf1	GDNF-inducible zinc finger protein 1	ZBTB	10.111	0.324975	8015
ENSMUSG00000025959	Klf7	Kruppel-like factor 7 (ubiquitous)	zf-C2H2	10.0963	0.459372	8019
ENSMUSG00000038342	Mlxip	MLX interacting protein	bHLH	10.0807	0.370018	8028
ENSMUSG00000000282	Mnt	max binding protein	bHLH	10.028	0.402065	8048
ENSMUSG00000079509	Zfx	zinc finger protein X-linked	zf-C2H2	10.0027	0.205138	8054
ENSMUSG00000074405	Zfp865	zinc finger protein 865	zf-C2H2	9.99063	0.681842	8057
ENSMUSG00000052056	Zfp217	zinc finger protein 217	zf-C2H2	9.98287	0.376395	8058
ENSMUSG00000005774	Rfx5	regulatory factor X, 5 (influences HLA class II expression)	RFX	9.95437	0.421208	8070
ENSMUSG00000037235	Mxd4	Max dimerization protein 4	bHLH	9.91839	0.302319	8081
ENSMUSG00000057551	Zfp317	zinc finger protein 317	zf-C2H2	9.87049	0.370832	8096
ENSMUSG00000053080	2700081O15Rik	RIKEN cDNA 2700081O15 gene	zf-BED	9.84964	0.659265	8107
ENSMUSG00000071266	Zfp946	zinc finger protein 946	zf-C2H2	9.76281	0.443996	8128
ENSMUSG00000031860	Pbx4	pre B cell leukemia homeobox 4	Homeobox	9.7374	0.599593	8144
ENSMUSG00000031393	Mecp2	methyl CpG binding protein 2	MBD	9.72214	0.35197	8150
ENSMUSG00000022601	Zbtb11	zinc finger and BTB domain containing 11	ZBTB	9.69948	0.307731	8156
ENSMUSG00000023892	Zfp51	zinc finger protein 51	zf-C2H2	9.67778	0.551302	8163
ENSMUSG00000049577	Zfpm1	zinc finger protein, multitype 1	zf-C2H2	9.67389	0.551344	8164
ENSMUSG00000044452	Zfp507	zinc finger protein 507	zf-C2H2	9.64578	0.702446	8170
ENSMUSG00000053347	Zfp943	zinc finger prtoein 943	zf-C2H2	9.62403	0.508091	8175
ENSMUSG00000048897	Zfp710	zinc finger protein 710	zf-C2H2	9.60951	0.489048	8177
ENSMUSG00000001065	Zfp276	zinc finger protein (C2H2 type) 276	zf-C2H2	9.59127	0.424366	8187
ENSMUSG00000033964	Zbtb41	zinc finger and BTB domain containing 41	ZBTB	9.54247	0.438048	8206
ENSMUSG00000026788	Zbtb43	zinc finger and BTB domain containing 43	ZBTB	9.52651	0.365805	8211
ENSMUSG00000045598	Zfp553	zinc finger protein 553	zf-C2H2	9.51916	0.446238	8213
ENSMUSG00000001911	Nfix	nuclear factor I/X	CTF/NFI	9.45553	0.517103	8240
ENSMUSG00000029587	Zfp12	zinc finger protein 12	zf-C2H2	9.4527	0.292346	8241
ENSMUSG00000021514	Zfp369	zinc finger protein 369	zf-C2H2	9.35598	0.41329	8266
ENSMUSG00000003032	Klf4	Kruppel-like factor 4 (gut)	zf-C2H2	9.23004	0.372959	8301
ENSMUSG00000032727	Mier3	MIER family member 3	MYB	9.21506	0.362188	8309
ENSMUSG00000045519	Zfp560	zinc finger protein 560	zf-C2H2	9.19753	0.318104	8314
ENSMUSG00000038692	Hoxb4	homeobox B4	Homeobox	9.12097	0.400369	8340
ENSMUSG00000019826	Zbtb24	zinc finger and BTB domain containing 24	ZBTB	9.1201	0.335754	8341
ENSMUSG00000069208	Zfp825	zinc finger protein 825	zf-C2H2	9.11411	0.491039	8343
ENSMUSG00000074829	2010315B03Rik	RIKEN cDNA 2010315B03 gene	zf-C2H2	9.07779	0.584247	8353
ENSMUSG00000059475	Zfp426	zinc finger protein 426	zf-C2H2	9.03941	0.426923	8367
ENSMUSG00000029627	Zkscan14	zinc finger with KRAB and SCAN domains 14	zf-C2H2	9.02222	0.34786	8371
ENSMUSG00000018347	Zkscan6	zinc finger with KRAB and SCAN domains 6	zf-C2H2	9.0132	0.218682	8373
ENSMUSG00000052446	Zfp961	zinc finger protein 961	zf-C2H2	9.00369	0.246317	8374
ENSMUSG00000042496	Prdm10	PR domain containing 10	zf-C2H2	8.94429	0.656716	8396
ENSMUSG00000041420	Meis3	Meis homeobox 3	Homeobox	8.93916	0.487106	8399
ENSMUSG00000041483	Zfp281	zinc finger protein 281	zf-C2H2	8.93386	0.351973	8403
ENSMUSG00000005621	Zfp592	zinc finger protein 592	zf-C2H2	8.88021	0.667574	8425
ENSMUSG00000062931	Zfp938	zinc finger protein 938	zf-C2H2	8.85347	0.489765	8431
ENSMUSG00000095990	Zfp97	zinc finger protein 97	zf-C2H2	8.84906	0.583273	8433
ENSMUSG00000029249	Rest	RE1-silencing transcription factor	zf-C2H2	8.7504	0.404951	8465
ENSMUSG00000024985	Tcf7l2	transcription factor 7 like 2, T cell specific, HMG box	HMG	8.74188	0.402274	8470
ENSMUSG00000044167	Foxo1	forkhead box O1	Fork head	8.65199	0.354286	8509
ENSMUSG00000090015	Gm15446	predicted gene 15446	zf-C2H2	8.56721	1.05095	8538
ENSMUSG00000019878	Hsf2	heat shock factor 2	HSF	8.54474	0.40293	8548
ENSMUSG00000029127	Zbtb49	zinc finger and BTB domain containing 49	ZBTB	8.54446	0.581617	8549
ENSMUSG00000030551	Nr2f2	nuclear receptor subfamily 2, group F, member 2	RXR-like	8.53476	0.496171	8551
ENSMUSG00000051550	Zfp579	zinc finger protein 579	zf-C2H2	8.51755	0.765945	8560
ENSMUSG00000028799	Zfp362	zinc finger protein 362	zf-C2H2	8.4657	0.427056	8582
ENSMUSG00000048763	Hoxb3	homeobox B3	Homeobox	8.45531	0.60069	8586
ENSMUSG00000042903	Foxo4	forkhead box O4	Fork head	8.44663	0.412053	8589
ENSMUSG00000078502	Gm13212	predicted gene 13212	zf-C2H2	8.44529	0.322507	8590
ENSMUSG00000062627	Mysm1	myb-like, SWIRM and MPN domains 1	MYB	8.4128	0.673281	8604
ENSMUSG00000075327	Zbtb2	zinc finger and BTB domain containing 2	ZBTB	8.40263	0.349058	8608
ENSMUSG00000038236	Hoxa7	homeobox A7	Homeobox	8.28396	0.223085	8649
ENSMUSG00000030353	Tead4	TEA domain family member 4	TEA	8.27025	0.274127	8654
ENSMUSG00000036036	Zfp57	zinc finger protein 57	zf-C2H2	8.25956	0.344767	8659
ENSMUSG00000003929	Zfp81	zinc finger protein 81	zf-C2H2	8.19521	0.180856	8685
ENSMUSG00000004043	Stat5a	signal transducer and activator of transcription 5A	STAT	8.15046	0.256961	8705
ENSMUSG00000023034	Nr4a1	nuclear receptor subfamily 4, group A, member 1	NGFIB-like	8.13492	0.225985	8717
ENSMUSG00000028952	Zbtb48	zinc finger and BTB domain containing 48	ZBTB	8.04499	0.497726	8747
ENSMUSG00000001156	Mxd1	MAX dimerization protein 1	bHLH	8.01078	0.259259	8757
ENSMUSG00000078903	Gm14391	predicted gene 14391	zf-C2H2	7.9925	0.468055	8761
ENSMUSG00000046351	Zfp322a	zinc finger protein 322A	zf-C2H2	7.95298	0.555343	8773
ENSMUSG00000048118	Arid4a	AT rich interactive domain 4A (RBP1-like)	ARID	7.94724	0.18846	8775
ENSMUSG00000071267	Zfp942	zinc finger protein 942	zf-C2H2	7.94631	0.573444	8776
ENSMUSG00000051817	Sox12	SRY (sex determining region Y)-box 12	HMG	7.94021	0.312304	8777
ENSMUSG00000058881	Zfp516	zinc finger protein 516	zf-C2H2	7.80709	0.316624	8822
ENSMUSG00000056383	AI987944	expressed sequence AI987944	zf-C2H2	7.7963	0.36117	8826
ENSMUSG00000006705	Pknox1	Pbx/knotted 1 homeobox	Homeobox	7.76768	0.221261	8836
ENSMUSG00000034333	Zbed4	zinc finger, BED type containing 4	zf-BED	7.68339	0.357087	8868
ENSMUSG00000067942	Zfp160	zinc finger protein 160	zf-C2H2	7.65458	0.332069	8883
ENSMUSG00000060301	2610008E11Rik	RIKEN cDNA 2610008E11 gene	zf-C2H2	7.60228	0.312446	8908
ENSMUSG00000020185	E2f7	E2F transcription factor 7	E2F	7.56886	0.43272	8923
ENSMUSG00000033713	Foxn3	forkhead box N3	Fork head	7.54685	0.421086	8931
ENSMUSG00000062175	Tgif2	TGFB-induced factor homeobox 2	Homeobox	7.51062	0.390661	8945
ENSMUSG00000038700	Hoxb5	homeobox B5	Homeobox	7.50642	0.550235	8946
ENSMUSG00000051413	Plagl2	pleiomorphic adenoma gene-like 2	zf-C2H2	7.4961	0.325013	8951
ENSMUSG00000037674	Rfx7	regulatory factor X, 7	RFX	7.43177	0.280178	8978
ENSMUSG00000024298	Zfp871	zinc finger protein 871	zf-C2H2	7.43051	0.39146	8979
ENSMUSG00000042439	Zfp532	zinc finger protein 532	zf-C2H2	7.41809	0.442661	8985
ENSMUSG00000020137	Thap2	THAP domain containing, apoptosis associated protein 2	THAP	7.382	0.454325	8997
ENSMUSG00000040712	Camta2	calmodulin binding transcription activator 2	CG-1	7.29217	0.497505	9030
ENSMUSG00000019256	Ahr	aryl-hydrocarbon receptor	bHLH	7.26962	0.283095	9041
ENSMUSG00000095193	Gm20939	predicted gene, 20939	zf-C2H2	7.26406	0.441619	9043
ENSMUSG00000045252	Zfp574	zinc finger protein 574	zf-C2H2	7.18274	0.332306	9075
ENSMUSG00000018678	Sp2	Sp2 transcription factor	zf-C2H2	7.17083	0.317977	9080
ENSMUSG00000032238	Rora	RAR-related orphan receptor alpha	THR-like	7.16862	0.188408	9081
ENSMUSG00000055240	Zfp101	zinc finger protein 101	zf-C2H2	7.13101	0.264266	9098
ENSMUSG00000066829	Zfp810	zinc finger protein 810	zf-C2H2	7.11993	0.315262	9103
ENSMUSG00000022526	Zfp251	zinc finger protein 251	zf-C2H2	7.05876	0.392473	9125
ENSMUSG00000036898	Zfp157	zinc finger protein 157	zf-C2H2	7.04442	0.280605	9129
ENSMUSG00000037007	Zfp113	zinc finger protein 113	zf-C2H2	6.98826	0.323161	9149
ENSMUSG00000023284	Zfp605	zinc finger protein 605	zf-C2H2	6.93656	0.378669	9167
ENSMUSG00000049739	Zfp646	zinc finger protein 646	zf-C2H2	6.92457	0.354651	9174
ENSMUSG00000019947	Arid5b	AT rich interactive domain 5B (MRF1-like)	ARID	6.92375	0.297981	9175
ENSMUSG00000031907	Zfp90	zinc finger protein 90	zf-C2H2	6.92209	0.265314	9176
ENSMUSG00000023990	Tfeb	transcription factor EB	bHLH	6.838	0.190051	9213
ENSMUSG00000096696	Zfp960	zinc finger protein 960	zf-C2H2	6.83458	0.464999	9218
ENSMUSG00000078861	Zfp931	zinc finger protein 931	zf-C2H2	6.82017	0.289327	9226
ENSMUSG00000078899	Gm4631	predicted gene 4631	zf-C2H2	6.8073	0.241097	9229
ENSMUSG00000014039	Prdm15	PR domain containing 15	zf-C2H2	6.79344	0.223345	9238
ENSMUSG00000018750	Zbtb4	zinc finger and BTB domain containing 4	ZBTB	6.79291	0.264231	9239
ENSMUSG00000028890	Mtf1	metal response element binding transcription factor 1	zf-C2H2	6.72262	0.213769	9272
ENSMUSG00000022361	Zhx1	zinc fingers and homeoboxes 1	Homeobox	6.68498	0.228933	9287
ENSMUSG00000000782	Tcf7	transcription factor 7, T cell specific	HMG	6.6447	0.23377	9305
ENSMUSG00000078862	Gm14326	predicted gene 14326	zf-C2H2	6.61838	0.344602	9316
ENSMUSG00000038797	Zscan2	zinc finger and SCAN domain containing 2	zf-C2H2	6.61835	0.445571	9317
ENSMUSG00000046658	Zfp316	zinc finger protein 316	zf-C2H2	6.59376	0.3041	9326
ENSMUSG00000015942	Gtf2ird2	GTF2I repeat domain containing 2	GTF2I	6.5849	0.337096	9330
ENSMUSG00000025821	Zfp282	zinc finger protein 282	zf-C2H2	6.49951	0.352625	9366
ENSMUSG00000027102	Hoxd8	homeobox D8	Homeobox	6.44546	0.17329	9384
ENSMUSG00000030199	Etv6	ets variant 6	ETS	6.41738	0.293102	9394
ENSMUSG00000025912	Mybl1	myeloblastosis oncogene-like 1	MYB	6.39317	0.2911	9400
ENSMUSG00000021485	Mxd3	Max dimerization protein 3	bHLH	6.38311	0.296561	9403
ENSMUSG00000019913	Sim1	single-minded family bHLH transcription factor 1	bHLH	6.34385	0.226125	9415
ENSMUSG00000068134	Zfp120	zinc finger protein 120	zf-C2H2	6.31522	0.320759	9427
ENSMUSG00000021250	Fos	FBJ osteosarcoma oncogene	TF_bZIP	6.28939	0.358618	9442
ENSMUSG00000047141	Zfp654	zinc finger protein 654	zf-C2H2	6.25286	0.283762	9458
ENSMUSG00000047412	Zbtb44	zinc finger and BTB domain containing 44	ZBTB	6.20848	0.3272	9473
ENSMUSG00000049672	Zbtb14	zinc finger and BTB domain containing 14	ZBTB	6.18125	0.227426	9486
ENSMUSG00000015501	Hivep2	human immunodeficiency virus type I enhancer binding protein 2	zf-C2H2	6.12035	0.284361	9507
ENSMUSG00000062012	Zfp13	zinc finger protein 13	zf-C2H2	6.07751	0.246312	9523
ENSMUSG00000037638	Zbtb42	zinc finger and BTB domain containing 42	ZBTB	6.07429	0.389855	9525
ENSMUSG00000096856	Gm10778	predicted gene 10778	zf-C2H2	6.06973	0.262438	9529
ENSMUSG00000030322	Mbd4	methyl-CpG binding domain protein 4	MBD	6.0642	0.225519	9531
ENSMUSG00000031103	Elf4	E74-like factor 4 (ets domain transcription factor)	ETS	6.0581	0.218467	9537
ENSMUSG00000027035	Cers6	ceramide synthase 6	Homeobox	6.03553	0.207872	9547
ENSMUSG00000091474	2610021A01Rik	RIKEN cDNA 2610021A01 gene	zf-C2H2	5.9641	0.371701	9565
ENSMUSG00000066798	Zbtb6	zinc finger and BTB domain containing 6	ZBTB	5.92092	0.217135	9576
ENSMUSG00000048410	Zfp407	zinc finger protein 407	zf-C2H2	5.90151	0.279103	9585
ENSMUSG00000071064	Zfp827	zinc finger protein 827	zf-C2H2	5.85634	0.292919	9604
ENSMUSG00000052040	Klf13	Kruppel-like factor 13	zf-C2H2	5.81064	0.365525	9625
ENSMUSG00000062116	Zfp954	zinc finger protein 954	zf-C2H2	5.798	0.268315	9630
ENSMUSG00000020653	Klf11	Kruppel-like factor 11	zf-C2H2	5.78053	0.194539	9642
ENSMUSG00000022306	Zfpm2	zinc finger protein, multitype 2	zf-C2H2	5.77468	0.224688	9645
ENSMUSG00000061371	Zfp873	zinc finger protein 873	zf-C2H2	5.75901	0.290774	9650
ENSMUSG00000050064	Zfp697	zinc finger protein 697	zf-C2H2	5.75115	0.254658	9658
ENSMUSG00000026135	Zfp142	zinc finger protein 142	zf-C2H2	5.74379	0.188419	9661
ENSMUSG00000057637	Prdm2	PR domain containing 2, with ZNF domain	zf-C2H2	5.73855	0.230896	9667
ENSMUSG00000074165	Zfp788	zinc finger protein 788	zf-C2H2	5.68898	0.30146	9687
ENSMUSG00000003154	Foxj2	forkhead box J2	Fork head	5.6774	0.372986	9691
ENSMUSG00000022708	Zbtb20	zinc finger and BTB domain containing 20	ZBTB	5.66782	0.376726	9694
ENSMUSG00000021366	Hivep1	human immunodeficiency virus type I enhancer binding protein 1	zf-C2H2	5.61131	0.2921	9719
ENSMUSG00000055148	Klf2	Kruppel-like factor 2 (lung)	zf-C2H2	5.56721	0.275986	9734
ENSMUSG00000037640	Zfp60	zinc finger protein 60	zf-C2H2	5.35073	0.239037	9814
ENSMUSG00000053007	Creb5	cAMP responsive element binding protein 5	TF_bZIP	5.33076	0.305315	9825
ENSMUSG00000016477	E2f3	E2F transcription factor 3	E2F	5.28101	0.21612	9843
ENSMUSG00000031737	Irx5	Iroquois homeobox 5	Homeobox	5.24742	0.231083	9858
ENSMUSG00000009406	Elk1	ELK1, member of ETS oncogene family	ETS	5.23646	0.224155	9864
ENSMUSG00000050714	Zbtb26	zinc finger and BTB domain containing 26	ZBTB	5.2336	0.230761	9867
ENSMUSG00000078994	Zfp429	zinc finger protein 429	zf-C2H2	5.21957	0.581726	9877
ENSMUSG00000038253	Hoxa5	homeobox A5	Homeobox	5.20045	0.280766	9881
ENSMUSG00000030256	Bhlhe41	basic helix-loop-helix family, member e41	bHLH	5.186	0.387428	9894
ENSMUSG00000045466	Zfp956	zinc finger protein 956	zf-C2H2	5.15409	0.208668	9906
ENSMUSG00000027210	Meis2	Meis homeobox 2	Homeobox	5.13925	0.262728	9913
ENSMUSG00000031365	Zfp275	zinc finger protein 275	zf-C2H2	5.13842	0.228209	9915
ENSMUSG00000063972	Nr6a1	nuclear receptor subfamily 6, group A, member 1	GCNF-like	5.1378	0.235059	9916
ENSMUSG00000013419	Zfp651	zinc finger protein 651	ZBTB	5.1376	0.262457	9917
ENSMUSG00000038560	Sp6	trans-acting transcription factor 6	zf-C2H2	5.12478	0.200915	9924
ENSMUSG00000071757	Zhx2	zinc fingers and homeoboxes 2	Homeobox	5.06814	0.329369	9959
ENSMUSG00000026380	Tfcp2l1	transcription factor CP2-like 1	CP2	5.03329	0.25497	9972
ENSMUSG00000050619	Zscan29	zinc finger SCAN domains 29	zf-C2H2	5.00772	0.154498	9987
ENSMUSG00000031665	Sall1	spalt like transcription factor 1	zf-C2H2	5.0019	0.167576	9989
ENSMUSG00000097333	Zfp87	zinc finger protein 87	zf-C2H2	4.99513	0.391795	9993
ENSMUSG00000096795	Zfp433	zinc finger protein 433	zf-C2H2	4.98426	0.409411	9999
ENSMUSG00000007805	Twist2	twist basic helix-loop-helix transcription factor 2	bHLH	4.95058	0.276926	10010
ENSMUSG00000055991	Zkscan5	zinc finger with KRAB and SCAN domains 5	zf-C2H2	4.94123	0.196099	10014
ENSMUSG00000078435	AU041133	expressed sequence AU041133	zf-C2H2	4.92851	0.130744	10024
ENSMUSG00000039789	Zfp597	zinc finger protein 597	zf-C2H2	4.91853	0.303537	10029
ENSMUSG00000063894	Zkscan8	zinc finger with KRAB and SCAN domains 8	zf-C2H2	4.83796	0.257659	10068
ENSMUSG00000033972	Zfp944	zinc finger protein 944	zf-C2H2	4.82544	0.334276	10074
ENSMUSG00000070031	Sp140	Sp140 nuclear body protein	SAND	4.79721	0.279384	10084
ENSMUSG00000049321	Zfp2	zinc finger protein 2	zf-C2H2	4.74675	0.2582	10117
ENSMUSG00000012640	Zfp715	zinc finger protein 715	zf-C2H2	4.68898	0.150026	10150
ENSMUSG00000049604	Hoxb13	homeobox B13	Homeobox	4.68413	0.1752	10153
ENSMUSG00000050605	Zfp61	zinc finger protein 61	zf-C2H2	4.68138	0.476055	10156
ENSMUSG00000049600	Zbtb45	zinc finger and BTB domain containing 45	ZBTB	4.66986	0.406666	10159
ENSMUSG00000024986	Hhex	hematopoietically expressed homeobox	Homeobox	4.61237	0.166345	10181
ENSMUSG00000063047	Zfp780b	zinc finger protein 780B	zf-C2H2	4.59423	0.298807	10190
ENSMUSG00000040321	Zfp770	zinc finger protein 770	zf-C2H2	4.59265	0.257611	10192
ENSMUSG00000078867	Gm14418	predicted gene 14418	zf-C2H2	4.51804	0.256228	10221
ENSMUSG00000074735	Gm21994	predicted gene 21994	zf-C2H2	4.48451	0.193167	10242
ENSMUSG00000023882	Zfp54	zinc finger protein 54	zf-C2H2	4.4554	0.308867	10255
ENSMUSG00000024968	Rcor2	REST corepressor 2	MYB	4.44172	0.329813	10262
ENSMUSG00000094441	Zfp955a	zinc finger protein 955A	zf-C2H2	4.43048	0.212826	10266
ENSMUSG00000074867	Zfp808	zinc finger protein 808	zf-C2H2	4.41215	0.504561	10280
ENSMUSG00000038210	Hoxa11	homeobox A11	Homeobox	4.40238	0.208532	10289
ENSMUSG00000074406	Zfp628	zinc finger protein 628	zf-C2H2	4.37934	0.182422	10298
ENSMUSG00000033883	D3Ertd254e	DNA segment, Chr 3, ERATO Doi 254, expressed	zf-C2H2	4.37849	0.201387	10300
ENSMUSG00000063632	Sox11	SRY (sex determining region Y)-box 11	HMG	4.35717	0.146151	10317
ENSMUSG00000102049	Zbed6	zinc finger, BED type containing 6	zf-BED	4.34844	0.369191	10322
ENSMUSG00000055799	Tcf7l1	transcription factor 7 like 1 (T cell specific, HMG box)	HMG	4.30417	0.263753	10342
ENSMUSG00000036721	Zscan12	zinc finger and SCAN domain containing 12	zf-C2H2	4.30036	0.234955	10345
ENSMUSG00000055633	Zfp580	zinc finger protein 580	zf-C2H2	4.29722	0.179301	10349
ENSMUSG00000044501	Zfp758	zinc finger protein 758	zf-C2H2	4.28274	0.317336	10354
ENSMUSG00000011427	Zfp790	zinc finger protein 790	zf-C2H2	4.26956	0.2187	10360
ENSMUSG00000026098	Pms1	PMS1 homolog 1, mismatch repair system component	HMG	4.26712	0.183695	10363
ENSMUSG00000003198	Zfp959	zinc finger protein 959	zf-C2H2	4.25602	0.287151	10369
ENSMUSG00000079560	Hoxa3	homeobox A3	Homeobox	4.25065	0.346583	10374
ENSMUSG00000022335	Zfat	zinc finger and AT hook domain containing	zf-C2H2	4.22746	0.112263	10386
ENSMUSG00000049728	Zfp668	zinc finger protein 668	zf-C2H2	4.21815	0.235638	10392
ENSMUSG00000060862	Zbtb40	zinc finger and BTB domain containing 40	ZBTB	4.21301	0.368579	10400
ENSMUSG00000021318	Gli3	GLI-Kruppel family member GLI3	zf-C2H2	4.20407	0.149422	10403
ENSMUSG00000026565	Pou2f1	POU domain, class 2, transcription factor 1	Pou	4.15865	0.253869	10425
ENSMUSG00000043219	Hoxa6	homeobox A6	Homeobox	4.14791	0.322331	10429
ENSMUSG00000045639	Zfp629	zinc finger protein 629	zf-C2H2	4.11093	0.174751	10441
ENSMUSG00000044617	Zbtb39	zinc finger and BTB domain containing 39	ZBTB	4.07973	0.134924	10461
ENSMUSG00000032425	Zfp949	zinc finger protein 949	zf-C2H2	4.07286	0.256779	10464
ENSMUSG00000057894	Zfp329	zinc finger protein 329	zf-C2H2	4.06559	0.269159	10467
ENSMUSG00000091183	Gm5141	predicted gene 5141	zf-C2H2	3.96882	0.287028	10513
ENSMUSG00000095993	Gm21060	predicted gene, 21060	zf-C2H2	3.96444	1.09621	10515
ENSMUSG00000028807	Zbtb8a	zinc finger and BTB domain containing 8a	ZBTB	3.96169	0.172192	10517
ENSMUSG00000078768	Zfp566	zinc finger protein 566	zf-C2H2	3.94097	0.352983	10528
ENSMUSG00000053600	Zfp472	zinc finger protein 472	zf-C2H2	3.93127	0.240192	10534
ENSMUSG00000061898	Rbak	RB-associated KRAB zinc finger	zf-C2H2	3.91114	0.154381	10548
ENSMUSG00000037447	Arid5a	AT rich interactive domain 5A (MRF1-like)	ARID	3.90361	0.236402	10551
ENSMUSG00000047003	Zfp41	zinc finger protein 41	zf-C2H2	3.89629	0.161829	10554
ENSMUSG00000053390	Zfp952	zinc finger protein 952	zf-C2H2	3.8833	0.188068	10559
ENSMUSG00000054967	Zfp647	zinc finger protein 647	zf-C2H2	3.87298	0.138181	10565
ENSMUSG00000071350	Setdb2	SET domain, bifurcated 2	MBD	3.85333	0.116267	10577
ENSMUSG00000038648	Creb3l2	cAMP responsive element binding protein 3-like 2	TF_bZIP	3.83847	0.169518	10585
ENSMUSG00000071256	Zfp213	zinc finger protein 213	zf-C2H2	3.83208	0.226156	10590
ENSMUSG00000071281	Zfp65	zinc finger protein 65	zf-C2H2	3.83104	0.181114	10592
ENSMUSG00000046541	Zfp526	zinc finger protein 526	zf-C2H2	3.8269	0.183506	10597
ENSMUSG00000020656	Grhl1	grainyhead like transcription factor 1	CP2	3.78253	0.136987	10621
ENSMUSG00000060336	Zfp937	zinc finger protein 937	zf-C2H2	3.77592	0.16573	10627
ENSMUSG00000073062	Zxdb	zinc finger, X-linked, duplicated B	zf-C2H2	3.77116	0.154917	10633
ENSMUSG00000055305	Zfp93	zinc finger protein 93	zf-C2H2	3.7494	0.0841341	10641
ENSMUSG00000040187	Arntl2	aryl hydrocarbon receptor nuclear translocator-like 2	bHLH	3.73617	0.357021	10647
ENSMUSG00000030386	Zfp606	zinc finger protein 606	zf-C2H2	3.68912	0.175579	10677
ENSMUSG00000051034	Zfp11	zinc finger protein 11	zf-C2H2	3.65957	0.184533	10691
ENSMUSG00000033454	Zbtb1	zinc finger and BTB domain containing 1	ZBTB	3.62022	0.14482	10707
ENSMUSG00000058093	Zfp729b	zinc finger protein 729b	zf-C2H2	3.6194	0.182513	10709
ENSMUSG00000067424	Zfp563	zinc finger protein 563	zf-C2H2	3.61692	0.163177	10715
ENSMUSG00000034998	Foxn2	forkhead box N2	Fork head	3.60166	0.156653	10722
ENSMUSG00000038895	Zfp653	zinc finger protein 653	zf-C2H2	3.58382	0.277778	10740
ENSMUSG00000006720	Zfp184	zinc finger protein 184 (Kruppel-like)	zf-C2H2	3.54146	0.293219	10759
ENSMUSG00000033016	Nfatc1	nuclear factor of activated T cells, cytoplasmic, calcineurin dependent 1	RHD	3.51931	0.145129	10773
ENSMUSG00000038679	Trps1	transcriptional repressor GATA binding 1	zf-GATA	3.5067	0.218257	10784
ENSMUSG00000074282	Zfp94	zinc finger protein 94	zf-C2H2	3.45291	0.328184	10813
ENSMUSG00000059142	Zfp945	zinc finger protein 945	zf-C2H2	3.44895	0.102688	10818
ENSMUSG00000026826	Nr4a2	nuclear receptor subfamily 4, group A, member 2	NGFIB-like	3.44865	0.703438	10819
ENSMUSG00000074221	Zfp568	zinc finger protein 568	zf-C2H2	3.43182	0.201456	10830
ENSMUSG00000071661	Zbtb3	zinc finger and BTB domain containing 3	ZBTB	3.42132	0.128353	10835
ENSMUSG00000054715	Zscan22	zinc finger and SCAN domain containing 22	zf-C2H2	3.39393	0.20575	10849
ENSMUSG00000095432	Zfp748	zinc finger protein 748	zf-C2H2	3.39152	0.157592	10851
ENSMUSG00000034460	Six4	sine oculis-related homeobox 4	Homeobox	3.36882	0.173414	10868
ENSMUSG00000062101	Zfp119b	zinc finger protein 119b	zf-C2H2	3.35213	0.1484	10880
ENSMUSG00000027684	Mecom	MDS1 and EVI1 complex locus	zf-C2H2	3.3512	0.233507	10882
ENSMUSG00000059975	Zfp74	zinc finger protein 74	zf-C2H2	3.34802	0.28323	10885
ENSMUSG00000071291	Zfp58	zinc finger protein 58	zf-C2H2	3.33876	0.0773686	10892
ENSMUSG00000038518	Jarid2	jumonji, AT rich interactive domain 2	ARID	3.33844	0.257074	10893
ENSMUSG00000078864	Gm14322	predicted gene 14322	zf-C2H2	3.31056	0.368732	10904
ENSMUSG00000046185	Zfp84	zinc finger protein 84	zf-C2H2	3.30741	0.0745633	10906
ENSMUSG00000045757	Zfp764	zinc finger protein 764	zf-C2H2	3.29638	0.180747	10918
ENSMUSG00000062861	Zfp28	zinc finger protein 28	zf-C2H2	3.26957	0.29819	10937
ENSMUSG00000096916	Zfp850	zinc finger protein 850	zf-C2H2	3.26205	0.221426	10939
ENSMUSG00000026630	Batf3	basic leucine zipper transcription factor, ATF-like 3	TF_bZIP	3.24689	0.252643	10953
ENSMUSG00000056014	A430033K04Rik	RIKEN cDNA A430033K04 gene	zf-C2H2	3.24287	0.106059	10956
ENSMUSG00000054381	Zfp747	zinc finger protein 747	zf-C2H2	3.23428	0.186267	10963
ENSMUSG00000063108	Zfp26	zinc finger protein 26	zf-C2H2	3.2088	0.27599	10981
ENSMUSG00000059423	Zfp933	zinc finger protein 933	zf-C2H2	3.20827	0.206803	10982
ENSMUSG00000074166	AW146154	expressed sequence AW146154	zf-C2H2	3.19597	0.132252	10986
ENSMUSG00000034800	Zfp661	zinc finger protein 661	zf-C2H2	3.19084	0.189804	10993
ENSMUSG00000020364	Zfp354a	zinc finger protein 354A	zf-C2H2	3.17805	0.236778	10999
ENSMUSG00000058192	Zfp846	zinc finger protein 846	zf-C2H2	3.17477	0.176549	11001
ENSMUSG00000066838	Zfp772	zinc finger protein 772	zf-C2H2	3.16969	0.104488	11006
ENSMUSG00000045842	Tgif2-ps2	TGFB-induced factor homeobox 2, pseudogene 2	Homeobox	3.16684	0.189924	11007
ENSMUSG00000061544	Zfp229	zinc finger protein 229	zf-C2H2	3.14339	0.241121	11019
ENSMUSG00000064043	Trerf1	transcriptional regulating factor 1	zf-C2H2	3.1304	0.107695	11026
ENSMUSG00000051351	Zfp46	zinc finger protein 46	zf-C2H2	3.12712	0.223299	11030
ENSMUSG00000072763	5430403G16Rik	RIKEN cDNA 5430403G16 gene	zf-C2H2	3.12591	0.0770669	11031
ENSMUSG00000038872	Zfhx3	zinc finger homeobox 3	Homeobox	3.10782	0.144878	11047
ENSMUSG00000029844	Hoxa1	homeobox A1	Homeobox	3.06927	0.108469	11064
ENSMUSG00000062040	Zfp27	zinc finger protein 27	zf-C2H2	3.04697	0.176941	11082
ENSMUSG00000069206	Zfp874a	zinc finger protein 874a	zf-C2H2	3.03241	0.315126	11100
ENSMUSG00000030469	Zfp719	zinc finger protein 719	zf-C2H2	3.03009	0.201635	11104
ENSMUSG00000062743	Zfp677	zinc finger protein 677	zf-C2H2	3.01594	0.169794	11110
ENSMUSG00000074862	BC025920	cDNA sequence BC025920	zf-C2H2	3.01345	0.189935	11111
ENSMUSG00000050397	Foxl2	forkhead box L2	Fork head	3.00244	0.157984	11118
ENSMUSG00000029771	Irf5	interferon regulatory factor 5	IRF	2.99286	0.170372	11124
ENSMUSG00000037169	Mycn	v-myc avian myelocytomatosis viral related oncogene, neuroblastoma derived	bHLH	2.99039	0.121265	11128
ENSMUSG00000072915	Gm12258	predicted gene 12258	zf-C2H2	2.97328	0.387669	11138
ENSMUSG00000067929	Gm10226	predicted gene 10226	zf-C2H2	2.93854	0.695504	11159
ENSMUSG00000072774	Zfp951	zinc finger protein 951	zf-C2H2	2.93351	0.170596	11165
ENSMUSG00000068966	Zbtb34	zinc finger and BTB domain containing 34	ZBTB	2.92135	0.24775	11172
ENSMUSG00000046556	Zfp319	zinc finger protein 319	zf-C2H2	2.91514	0.167907	11178
ENSMUSG00000034227	Foxj1	forkhead box J1	Fork head	2.89455	0.18361	11188
ENSMUSG00000017667	Zfp334	zinc finger protein 334	zf-C2H2	2.85636	0.13181	11219
ENSMUSG00000024206	Rfx2	regulatory factor X, 2 (influences HLA class II expression)	RFX	2.85122	0.141989	11221
ENSMUSG00000035877	Zhx3	zinc fingers and homeoboxes 3	Homeobox	2.82645	0.128513	11237
ENSMUSG00000045268	Zfp691	zinc finger protein 691	zf-C2H2	2.82116	0.179026	11241
ENSMUSG00000036867	Smad6	SMAD family member 6	MH1	2.81757	0.105275	11245
ENSMUSG00000054519	Zfp867	zinc finger protein 867	zf-C2H2	2.81062	0.111834	11252
ENSMUSG00000018983	E2f2	E2F transcription factor 2	E2F	2.80956	0.174725	11253
ENSMUSG00000070828	Zscan4f	zinc finger and SCAN domain containing 4F	zf-C2H2	2.77175	0.372028	11277
ENSMUSG00000019817	Plagl1	pleiomorphic adenoma gene-like 1	zf-C2H2	2.76128	0.188597	11281
ENSMUSG00000030604	Zfp626	zinc finger protein 626	zf-C2H2	2.75625	0.192564	11291
ENSMUSG00000038415	Foxq1	forkhead box Q1	Fork head	2.75314	0.141344	11292
ENSMUSG00000031618	Nr3c2	nuclear receptor subfamily 3, group C, member 2	ESR-like	2.73969	0.181329	11302
ENSMUSG00000078779	Zfp59	zinc finger protein 59	zf-C2H2	2.7358	0.150046	11306
ENSMUSG00000043467	Zbtb37	zinc finger and BTB domain containing 37	ZBTB	2.69887	0.121139	11329
ENSMUSG00000020491	2810021J22Rik	RIKEN cDNA 2810021J22 gene	zf-C2H2	2.6767	0.384544	11344
ENSMUSG00000015619	Gata3	GATA binding protein 3	zf-GATA	2.67264	0.173695	11346
ENSMUSG00000025323	Sp4	trans-acting transcription factor 4	zf-C2H2	2.65095	0.190186	11361
ENSMUSG00000021510	Zfp729a	zinc finger protein 729a	zf-C2H2	2.58602	0.369497	11400
ENSMUSG00000049532	Sall2	spalt like transcription factor 2	zf-C2H2	2.58039	0.125014	11408
ENSMUSG00000011267	Zfp296	zinc finger protein 296	zf-C2H2	2.56797	0.164704	11417
ENSMUSG00000027868	Tbx15	T-box 15	T-box	2.53686	0.168121	11442
ENSMUSG00000057156	Homez	homeodomain leucine zipper-encoding gene	Homeobox	2.5294	0.276974	11447
ENSMUSG00000096910	Zfp955b	zinc finger protein 955B	zf-C2H2	2.51576	0.106664	11458
ENSMUSG00000035451	Foxa1	forkhead box A1	Fork head	2.51008	0.147468	11463
ENSMUSG00000043602	Zfp3	zinc finger protein 3	zf-C2H2	2.50721	0.202168	11465
ENSMUSG00000068130	Zfp442	zinc finger protein 442	zf-C2H2	2.49867	0.157442	11471
ENSMUSG00000092260	Zfp963	zinc finger protein 963	zf-C2H2	2.48706	0.200143	11481
ENSMUSG00000050855	Zfp940	zinc finger protein 940	zf-C2H2	2.46476	0.367863	11503
ENSMUSG00000000567	Sox9	SRY (sex determining region Y)-box 9	HMG	2.46382	0.089362	11504
ENSMUSG00000043342	Hoxd9	homeobox D9	Homeobox	2.45563	0.0986485	11511
ENSMUSG00000078995	Zfp456	zinc finger protein 456	zf-C2H2	2.45411	0.23798	11512
ENSMUSG00000059842	Zfp341	zinc finger protein 341	zf-C2H2	2.43519	0.064497	11520
ENSMUSG00000067928	Zfp760	zinc finger protein 760	zf-C2H2	2.41381	0.146901	11538
ENSMUSG00000050954	Zfp169	zinc finger protein 169	zf-C2H2	2.41256	0.325521	11540
ENSMUSG00000023411	Nfatc4	nuclear factor of activated T cells, cytoplasmic, calcineurin dependent 4	RHD	2.38831	0.290912	11556
ENSMUSG00000042320	Prox2	prospero homeobox 2	HPD	2.35578	0.143921	11572
ENSMUSG00000057835	Zfp119a	zinc finger protein 119a	zf-C2H2	2.35074	0.124541	11581
ENSMUSG00000092416	Zfp141	zinc finger protein 141	zf-C2H2	2.34798	0.221426	11587
ENSMUSG00000063383	Zfp947	zinc finger protein 947	zf-C2H2	2.33409	0.187055	11598
ENSMUSG00000029832	Nfe2l3	nuclear factor, erythroid derived 2, like 3	TF_bZIP	2.32988	0.172399	11605
ENSMUSG00000078503	Zfp990	zinc finger protein 990	zf-C2H2	2.30286	0.331331	11623
ENSMUSG00000047638	Nr1h4	nuclear receptor subfamily 1, group H, member 4	THR-like	2.29849	0.130156	11628
ENSMUSG00000000942	Hoxa4	homeobox A4	Homeobox	2.2973	0.181858	11631
ENSMUSG00000030145	Zfp248	zinc finger protein 248	zf-C2H2	2.29499	0.309261	11634
ENSMUSG00000066687	Zbtb16	zinc finger and BTB domain containing 16	ZBTB	2.29039	0.124124	11641
ENSMUSG00000098022	Zfp82	zinc finger protein 82	zf-C2H2	2.2268	0.138277	11692
ENSMUSG00000035799	Twist1	twist basic helix-loop-helix transcription factor 1	bHLH	2.22406	0.130207	11696
ENSMUSG00000007216	Zfp775	zinc finger protein 775	zf-C2H2	2.22325	0.247436	11697
ENSMUSG00000048280	Zfp738	zinc finger protein 738	zf-C2H2	2.1912	0.194643	11720
ENSMUSG00000019564	Arid3a	AT rich interactive domain 3A (BRIGHT-like)	ARID	2.18878	0.106087	11722
ENSMUSG00000020275	Rel	reticuloendotheliosis oncogene	RHD	2.181	0.0795758	11726
ENSMUSG00000069743	Zfp820	zinc finger protein 820	zf-C2H2	2.16879	0.0978554	11736
ENSMUSG00000067430	Zfp763	zinc finger protein 763	zf-C2H2	2.13321	0.0813093	11762
ENSMUSG00000002111	Spi1	spleen focus forming virus (SFFV) proviral integration oncogene	ETS	2.10329	0.309041	11784
ENSMUSG00000047603	Zfp235	zinc finger protein 235	zf-C2H2	2.10208	0.168555	11788
ENSMUSG00000013089	Etv5	ets variant 5	ETS	2.0323	0.0936901	11865
ENSMUSG00000039153	Runx2	runt related transcription factor 2	Runt	1.99729	0.258851	11899
ENSMUSG00000079033	Mef2b	myocyte enhancer factor 2B	SRF	1.98594	0.100265	11908
ENSMUSG00000006310	Zbtb32	zinc finger and BTB domain containing 32	ZBTB	1.98229	0.128999	11913
ENSMUSG00000078580	E430018J23Rik	RIKEN cDNA E430018J23 gene	zf-C2H2	1.96854	0.166937	11923
ENSMUSG00000070034	Sp110	Sp110 nuclear body protein	SAND	1.95578	0.141609	11934
ENSMUSG00000062519	Zfp398	zinc finger protein 398	zf-C2H2	1.95516	0.0879411	11935
ENSMUSG00000074220	Zfp382	zinc finger protein 382	zf-C2H2	1.9381	0.230318	11959
ENSMUSG00000078887	Gm6710	predicted gene 6710	zf-C2H2	1.93703	0.362763	11963
ENSMUSG00000026872	Zeb2	zinc finger E-box binding homeobox 2	zf-C2H2	1.93157	0.271832	11970
ENSMUSG00000028389	Zfp37	zinc finger protein 37	zf-C2H2	1.92278	0.0966635	11973
ENSMUSG00000074622	Mafb	v-maf musculoaponeurotic fibrosarcoma oncogene family, protein B (avian)	TF_bZIP	1.85591	0.0914544	12033
ENSMUSG00000054737	Zfp182	zinc finger protein 182	zf-C2H2	1.85559	0.124075	12035
ENSMUSG00000059839	Zfp874b	zinc finger protein 874b	zf-C2H2	1.85034	0.273219	12039
ENSMUSG00000040721	Zfhx2	zinc finger homeobox 2	Homeobox	1.83431	0.112826	12054
ENSMUSG00000087598	Zfp111	zinc finger protein 111	zf-C2H2	1.81286	0.249487	12074
ENSMUSG00000058402	Zfp420	zinc finger protein 420	zf-C2H2	1.79316	0.142367	12103
ENSMUSG00000058900	Rsl1	regulator of sex limited protein 1	zf-C2H2	1.78963	0.199224	12110
ENSMUSG00000027583	Zbtb46	zinc finger and BTB domain containing 46	ZBTB	1.78924	0.0860978	12112
ENSMUSG00000101174	Hoxd4	homeobox D4	Homeobox	1.78005	0.12268	12124
ENSMUSG00000095253	Zfp799	zinc finger protein 799	zf-C2H2	1.77401	0.356203	12128
ENSMUSG00000040929	Rfx3	regulatory factor X, 3 (influences HLA class II expression)	RFX	1.76344	0.0592127	12138
ENSMUSG00000063488	Zkscan7	zinc finger with KRAB and SCAN domains 7	zf-C2H2	1.75948	0.0647283	12145
ENSMUSG00000047473	Zfp30	zinc finger protein 30	zf-C2H2	1.75673	0.0760209	12150
ENSMUSG00000006587	Snai3	snail family zinc finger 3	zf-C2H2	1.75325	0.101485	12157
ENSMUSG00000095325	Zfp870	zinc finger protein 870	zf-C2H2	1.72185	0.171821	12193
ENSMUSG00000057396	Zfp759	zinc finger protein 759	zf-C2H2	1.70234	0.0583481	12221
ENSMUSG00000027544	Nfatc2	nuclear factor of activated T cells, cytoplasmic, calcineurin dependent 2	RHD	1.67814	0.0836632	12249
ENSMUSG00000091764	Zfp964	zinc finger protein 964	zf-C2H2	1.67293	0.0605696	12255
ENSMUSG00000040841	Six5	sine oculis-related homeobox 5	Homeobox	1.62615	0.0985433	12297
ENSMUSG00000037001	Zfp39	zinc finger protein 39	zf-C2H2	1.61111	0.0833339	12319
ENSMUSG00000028487	Bnc2	basonuclin 2	zf-C2H2	1.60532	0.126084	12331
ENSMUSG00000034762	Glis1	GLIS family zinc finger 1	zf-C2H2	1.53021	0.262372	12414
ENSMUSG00000061894	Zscan20	zinc finger and SCAN domains 20	zf-C2H2	1.51459	0.0732417	12435
ENSMUSG00000062794	Zfp599	zinc finger protein 599	zf-C2H2	1.4895	0.082435	12465
ENSMUSG00000078886	Gm2026	predicted gene 2026	zf-C2H2	1.47599	0.295868	12478
ENSMUSG00000057842	Zfp595	zinc finger protein 595	zf-C2H2	1.47496	0.0929184	12479
ENSMUSG00000048012	Zfp473	zinc finger protein 473	zf-C2H2	1.47044	0.107616	12488
ENSMUSG00000062944	9130023H24Rik	RIKEN cDNA 9130023H24 gene	zf-C2H2	1.45543	0.0852178	12509
ENSMUSG00000055341	Zfp457	zinc finger protein 457	zf-C2H2	1.43427	0.172692	12540
ENSMUSG00000090659	Zfp493	zinc finger protein 493	zf-C2H2	1.43312	0.376008	12542
ENSMUSG00000025997	Ikzf2	IKAROS family zinc finger 2	zf-C2H2	1.40804	0.0974868	12574
ENSMUSG00000002617	Zfp40	zinc finger protein 40	zf-C2H2	1.38569	0.119109	12613
ENSMUSG00000014704	Hoxa2	homeobox A2	Homeobox	1.34184	0.0721735	12672
ENSMUSG00000098905	Zfp953	zinc finger protein 953	zf-C2H2	1.31642	0.0981879	12715
ENSMUSG00000074194	Zfp791	zinc finger protein 791	zf-C2H2	1.30929	0.0775683	12729
ENSMUSG00000053552	Ebf4	early B cell factor 4	COE	1.30896	0.0814082	12731
ENSMUSG00000051037	Zfp455	zinc finger protein 455	zf-C2H2	1.30096	0.0958686	12741
ENSMUSG00000078302	Foxd1	forkhead box D1	Fork head	1.29215	0.0827106	12755
ENSMUSG00000004500	Zfp324	zinc finger protein 324	zf-C2H2	1.28225	0.117395	12776
ENSMUSG00000053985	Zfp14	zinc finger protein 14	zf-C2H2	1.28189	0.070582	12778
ENSMUSG00000055560	Zfp459	zinc finger protein 459	zf-C2H2	1.25404	0.214959	12822
ENSMUSG00000039634	Zfp189	zinc finger protein 189	zf-C2H2	1.2382	0.0791623	12837
ENSMUSG00000008206	Cers4	ceramide synthase 4	Homeobox	1.20378	0.157786	12889
ENSMUSG00000019982	Myb	myeloblastosis oncogene	MYB	1.19162	0.0877203	12912
ENSMUSG00000039377	Hlx	H2.0-like homeobox	Homeobox	1.16862	0.0961276	12949
ENSMUSG00000078870	Gm14410	predicted gene 14410	zf-C2H2	1.15772	0.203741	12973
ENSMUSG00000073448	Gm10509	predicted gene 10509	zf-C2H2	1.14774	0.0955996	12990
ENSMUSG00000030393	Zik1	zinc finger protein interacting with K protein 1	zf-C2H2	1.14763	0.0529192	12991
ENSMUSG00000029913	Prdm5	PR domain containing 5	zf-C2H2	1.14693	0.0580804	12994
ENSMUSG00000030424	Zfp939	zinc finger protein 939	zf-C2H2	1.13761	0.0606438	13010
ENSMUSG00000004661	Arid3b	AT rich interactive domain 3B (BRIGHT-like)	ARID	1.1347	0.198603	13021
ENSMUSG00000005917	Otx1	orthodenticle homeobox 1	TF_Otx	1.12596	0.146729	13040
ENSMUSG00000064141	Zfp69	zinc finger protein 69	zf-C2H2	1.12495	0.0917373	13046
ENSMUSG00000000731	Aire	autoimmune regulator (autoimmune polyendocrinopathy candidiasis ectodermal dystrophy)	SAND	1.12433	0.202187	13048
ENSMUSG00000021379	Id4	inhibitor of DNA binding 4	bHLH	1.11426	0.0793583	13065
ENSMUSG00000033961	Zfp446	zinc finger protein 446	zf-C2H2	1.10761	0.0646574	13084
ENSMUSG00000091736	Yy2	Yy2 transcription factor	zf-C2H2	1.09925	0.102144	13096
ENSMUSG00000027938	Creb3l4	cAMP responsive element binding protein 3-like 4	TF_bZIP	1.0974	0.0356082	13103
ENSMUSG00000030823	9130019O22Rik	RIKEN cDNA 9130019O22 gene	zf-C2H2	1.06832	0.0569725	13171
ENSMUSG00000025602	Zfp202	zinc finger protein 202	zf-C2H2	1.06394	0.0805386	13180
ENSMUSG00000048921	Zfp689	zinc finger protein 689	zf-C2H2	1.04261	0.110528	13229
ENSMUSG00000074500	Zfp558	zinc finger protein 558	zf-C2H2	1.03938	0.160874	13236
ENSMUSG00000034538	Zfp418	zinc finger protein 418	zf-C2H2	1.0342	0.0609596	13247
ENSMUSG00000034071	Zfp551	zinc fingr protein 551	zf-C2H2	1.02411	0.105566	13267
ENSMUSG00000090093	Gm14399	predicted gene 14399	zf-C2H2	0.980732	0.0966132	13352
ENSMUSG00000037868	Egr2	early growth response 2	zf-C2H2	0.974811	0.0703966	13367
ENSMUSG00000025255	Zfhx4	zinc finger homeodomain 4	Homeobox	0.964053	0.0883761	13384
ENSMUSG00000094786	Gm14403	predicted gene 14403	zf-C2H2	0.9625	0.0930376	13390
ENSMUSG00000028610	Dmrtb1	DMRT-like family B with proline-rich C-terminal, 1	DM	0.959847	0.0678888	13393
ENSMUSG00000050240	Hic2	hypermethylated in cancer 2	ZBTB	0.950321	0.0477809	13416
ENSMUSG00000058331	Zfp85	zinc finger protein 85	zf-C2H2	0.9376	0.0770243	13451
ENSMUSG00000020160	Meis1	Meis homeobox 1	Homeobox	0.912193	0.079914	13511
ENSMUSG00000005836	Gata6	GATA binding protein 6	zf-GATA	0.889643	0.0561704	13556
ENSMUSG00000003545	Fosb	FBJ osteosarcoma oncogene B	TF_bZIP	0.886079	0.0924467	13561
ENSMUSG00000072294	Klf12	Kruppel-like factor 12	zf-C2H2	0.863708	0.0714838	13623
ENSMUSG00000042097	Zfp239	zinc finger protein 239	zf-C2H2	0.83778	0.167978	13690
ENSMUSG00000038331	Satb2	special AT-rich sequence binding protein 2	CUT	0.823207	0.0434446	13719
ENSMUSG00000055480	Zfp458	zinc finger protein 458	zf-C2H2	0.809516	0.0643556	13752
ENSMUSG00000035158	Mitf	melanogenesis associated transcription factor	bHLH	0.806856	0.0739225	13755
ENSMUSG00000052675	Zfp112	zinc finger protein 112	zf-C2H2	0.806375	0.0815786	13756
ENSMUSG00000095936	Zscan4e	zinc finger and SCAN domain containing 4E	zf-C2H2	0.805609	0.0984471	13758
ENSMUSG00000037188	Grhl3	grainyhead like transcription factor 3	CP2	0.795903	0.045987	13787
ENSMUSG00000095339	Zscan4b	zinc finger and SCAN domain containing 4B	zf-C2H2	0.791732	0.160522	13802
ENSMUSG00000069755	Zfp125	zinc finger protein 125	zf-C2H2	0.783127	0.127115	13818
ENSMUSG00000048387	Osr1	odd-skipped related transcription factor 1	zf-C2H2	0.77972	0.153278	13826
ENSMUSG00000005373	Mlxipl	MLX interacting protein-like	bHLH	0.755927	0.0800748	13902
ENSMUSG00000001497	Pax9	paired box 9	PAX	0.75208	0.0572025	13922
ENSMUSG00000054272	Zscan4c	zinc finger and SCAN domain containing 4C	zf-C2H2	0.751173	0.0799415	13925
ENSMUSG00000078896	Zfp965	zinc finger protein 965	zf-C2H2	0.746301	0.237321	13944
ENSMUSG00000054939	Zfp174	zinc finger protein 174	zf-C2H2	0.741941	0.0341017	13954
ENSMUSG00000095545	Zfp969	zinc finger protein 969	zf-C2H2	0.727756	0.533641	14000
ENSMUSG00000029563	Foxp2	forkhead box P2	Fork head	0.727746	0.136681	14001
ENSMUSG00000057098	Ebf1	early B cell factor 1	COE	0.722977	0.0535895	14011
ENSMUSG00000026610	Esrrg	estrogen-related receptor gamma	ESR-like	0.698009	0.267832	14082
ENSMUSG00000048562	Sp8	trans-acting transcription factor 8	zf-C2H2	0.696335	0.0860138	14088
ENSMUSG00000005267	Zfp287	zinc finger protein 287	zf-C2H2	0.676706	0.0438502	14152
ENSMUSG00000023781	Hes7	hes family bHLH transcription factor 7	bHLH	0.675051	0.072229	14157
ENSMUSG00000043290	Zfp784	zinc finger protein 784	zf-C2H2	0.660671	0.0587824	14206
ENSMUSG00000030380	Mzf1	myeloid zinc finger 1	zf-C2H2	0.646903	0.0638506	14258
ENSMUSG00000075394	Hoxc4	homeobox C4	Homeobox	0.641018	0.0194216	14274
ENSMUSG00000040270	Bach2	BTB and CNC homology, basic leucine zipper transcription factor 2	TF_bZIP	0.637867	0.143468	14286
ENSMUSG00000074283	Zfp109	zinc finger protein 109	zf-C2H2	0.635026	0.0547516	14296
ENSMUSG00000069184	Zfp72	zinc finger protein 72	zf-C2H2	0.629318	0.066476	14317
ENSMUSG00000041272	Tox	thymocyte selection-associated high mobility group box	HMG	0.611507	0.0358399	14386
ENSMUSG00000056019	Zfp709	zinc finger protein 709	zf-C2H2	0.60537	0.0963017	14411
ENSMUSG00000030699	Tbx6	T-box 6	T-box	0.600322	0.0549592	14432
ENSMUSG00000039476	Prrx2	paired related homeobox 2	Homeobox	0.599113	0.131925	14440
ENSMUSG00000017950	Hnf4a	hepatic nuclear factor 4, alpha	RXR-like	0.587122	0.165323	14491
ENSMUSG00000040289	Hey1	hairy/enhancer-of-split related with YRPW motif 1	bHLH	0.570133	0.028397	14565
ENSMUSG00000054893	Zfp667	zinc finger protein 667	zf-C2H2	0.569461	0.0421373	14569
ENSMUSG00000048485	Zbtb8b	zinc finger and BTB domain containing 8b	ZBTB	0.560085	0.0217272	14598
ENSMUSG00000030087	Klf15	Kruppel-like factor 15	zf-C2H2	0.545706	0.0586873	14664
ENSMUSG00000000247	Lhx2	LIM homeobox protein 2	Homeobox	0.539045	0.0885556	14703
ENSMUSG00000078877	Gm14295	predicted gene 14295	zf-C2H2	0.531665	0.122168	14743
ENSMUSG00000073176	Zfp449	zinc finger protein 449	zf-C2H2	0.531162	0.042385	14746
ENSMUSG00000047342	Zfp286	zinc finger protein 286	zf-C2H2	0.53088	0.0883459	14748
ENSMUSG00000073197	5730507C01Rik	RIKEN cDNA 5730507C01 gene	zf-C2H2	0.528985	0.0307903	14756
ENSMUSG00000055150	Zfp78	zinc finger protein 78	zf-C2H2	0.521942	0.0840831	14792
ENSMUSG00000060397	Zfp128	zinc finger protein 128	zf-C2H2	0.512373	0.0318931	14837
ENSMUSG00000002108	Nr1h3	nuclear receptor subfamily 1, group H, member 3	THR-like	0.508123	0.094598	14859
ENSMUSG00000074887	EU599041	expressed sequence EU599041	zf-C2H2	0.505088	0.119621	14875
ENSMUSG00000090641	Zfp712	zinc finger protein 712	zf-C2H2	0.489579	0.0291354	14963
ENSMUSG00000044676	Zfp612	zinc finger protein 612	zf-C2H2	0.487739	0.0466569	14973
ENSMUSG00000072623	Zfp9	zinc finger protein 9	zf-C2H2	0.486604	0.049015	14986
ENSMUSG00000044807	Zfp354c	zinc finger protein 354C	zf-C2H2	0.471785	0.101959	15071
ENSMUSG00000019768	Esr1	estrogen receptor 1 (alpha)	ESR-like	0.452549	0.0540588	15189
ENSMUSG00000090714	Zscan4d	zinc finger and SCAN domain containing 4D	zf-C2H2	0.452472	0.0796042	15191
ENSMUSG00000020335	Zfp354b	zinc finger protein 354B	zf-C2H2	0.431297	0.0634958	15336
ENSMUSG00000047907	Tshz2	teashirt zinc finger family member 2	zf-C2H2	0.426905	0.0297979	15367
ENSMUSG00000004151	Etv1	ets variant 1	ETS	0.425629	0.0474411	15374
ENSMUSG00000052135	Foxo6	forkhead box O6	Fork head	0.425558	0.0490746	15375
ENSMUSG00000056592	Zfp658	zinc finger protein 658	zf-C2H2	0.418961	0.0312014	15422
ENSMUSG00000038151	Prdm1	PR domain containing 1, with ZNF domain	zf-C2H2	0.412705	0.0355985	15454
ENSMUSG00000022383	Ppara	peroxisome proliferator activated receptor alpha	THR-like	0.406586	0.0619477	15500
ENSMUSG00000030486	Zfp108	zinc finger protein 108	zf-C2H2	0.40606	0.0416848	15507
ENSMUSG00000038203	Hoxa13	homeobox A13	Homeobox	0.404395	0.0431509	15515
ENSMUSG00000030446	Zfp273	zinc finger protein 273	zf-C2H2	0.399471	0.0357042	15539
ENSMUSG00000069475	Gm6020	predicted gene 6020	zf-C2H2	0.391944	0.391944	15592
ENSMUSG00000015709	Arnt2	aryl hydrocarbon receptor nuclear translocator 2	bHLH	0.391427	0.0629125	15600
ENSMUSG00000079681	Zglp1	zinc finger, GATA-like protein 1	zf-GATA	0.387126	0.130288	15626
ENSMUSG00000040891	Foxa3	forkhead box A3	Fork head	0.376388	0.0311203	15696
ENSMUSG00000048450	Msx1	msh homeobox 1	Homeobox	0.371802	0.0482496	15731
ENSMUSG00000002057	Foxn1	forkhead box N1	Fork head	0.370012	0.0266656	15742
ENSMUSG00000078881	Gm14434	predicted gene 14434	zf-C2H2	0.364485	0.239788	15792
ENSMUSG00000028565	Nfia	nuclear factor I/A	CTF/NFI	0.362633	0.0875975	15808
ENSMUSG00000068959	Zfp619	zinc finger protein 619	zf-C2H2	0.362113	0.0372178	15812
ENSMUSG00000059325	Hopx	HOP homeobox	Homeobox	0.361237	0.0584326	15820
ENSMUSG00000052271	Bhlha15	basic helix-loop-helix family, member a15	bHLH	0.360096	0.0332577	15830
ENSMUSG00000034957	Cebpa	CCAAT/enhancer binding protein (C/EBP), alpha	C/EBP	0.357466	0.043629	15850
ENSMUSG00000092544	Gm20422	predicted gene 20422	zf-C2H2	0.350001	0.170159	15906
ENSMUSG00000028634	Hivep3	human immunodeficiency virus type I enhancer binding protein 3	zf-C2H2	0.348259	0.0696788	15917
ENSMUSG00000051499	Zfp786	zinc finger protein 786	zf-C2H2	0.346345	0.0997394	15928
ENSMUSG00000000440	Pparg	peroxisome proliferator activated receptor gamma	THR-like	0.329126	0.0289968	16078
ENSMUSG00000019789	Hey2	hairy/enhancer-of-split related with YRPW motif 2	bHLH	0.328203	0.045024	16087
ENSMUSG00000024238	Zeb1	zinc finger E-box binding homeobox 1	zf-C2H2	0.326367	0.0840483	16105
ENSMUSG00000022479	Vdr	vitamin D (1,25-dihydroxyvitamin D3) receptor	THR-like	0.324442	0.053657	16120
ENSMUSG00000017491	Rarb	retinoic acid receptor, beta	THR-like	0.316959	0.046818	16198
ENSMUSG00000048349	Pou4f1	POU domain, class 4, transcription factor 1	Pou	0.315154	0.0656509	16212
ENSMUSG00000044519	Zfp488	zinc finger protein 488	zf-C2H2	0.307513	0.0453553	16288
ENSMUSG00000042821	Snai1	snail family zinc finger 1	zf-C2H2	0.301641	0.0370603	16337
ENSMUSG00000027796	Smad9	SMAD family member 9	MH1	0.301034	0.0338121	16341
ENSMUSG00000002578	Ikzf4	IKAROS family zinc finger 4	zf-C2H2	0.299433	0.0700601	16353
ENSMUSG00000063535	Zfp773	zinc finger protein 773	zf-C2H2	0.292448	0.0341067	16418
ENSMUSG00000095975	Cphx1	cytoplasmic polyadenylated homeobox 1	Homeobox	0.291807	0.100235	16425
ENSMUSG00000074824	Rslcan18	regulator of sex-limitation candidate 18	zf-C2H2	0.291443	0.0404563	16434
ENSMUSG00000028640	Tfap2c	transcription factor AP-2, gamma	AP-2	0.286806	0.0425577	16484
ENSMUSG00000018698	Lhx1	LIM homeobox protein 1	Homeobox	0.275693	0.0420793	16599
ENSMUSG00000064137	Rhox8	reproductive homeobox 8	Homeobox	0.273279	0.052771	16619
ENSMUSG00000041540	Sox5	SRY (sex determining region Y)-box 5	HMG	0.262378	0.0549751	16738
ENSMUSG00000020037	Rfx4	regulatory factor X, 4 (influences HLA class II expression)	RFX	0.262126	0.185603	16740
ENSMUSG00000029644	Pdx1	pancreatic and duodenal homeobox 1	Homeobox	0.257091	0.0322388	16795
ENSMUSG00000042812	Foxf1	forkhead box F1	Fork head	0.256187	0.0388728	16802
ENSMUSG00000035041	Creb3l3	cAMP responsive element binding protein 3-like 3	TF_bZIP	0.255856	0.108382	16808
ENSMUSG00000037279	Ovol2	ovo like zinc finger 2	zf-C2H2	0.252771	0.0315438	16827
ENSMUSG00000069171	Nr2f1	nuclear receptor subfamily 2, group F, member 1	RXR-like	0.250229	0.0695471	16864
ENSMUSG00000066007	Zfp600	zinc finger protein 600	zf-C2H2	0.242092	0.141357	16975
ENSMUSG00000043456	Zfp536	zinc finger protein 536	zf-C2H2	0.239582	0.0338128	17003
ENSMUSG00000091020	Gm5828	predicted gene 5828	HMG	0.237976	0.0347174	17015
ENSMUSG00000021575	Ahrr	aryl-hydrocarbon receptor repressor	bHLH	0.237338	0.108209	17019
ENSMUSG00000042109	Csdc2	cold shock domain containing C2, RNA binding	CSD	0.234881	0.0251699	17048
ENSMUSG00000079629	Rhox2g	reproductive homeobox 2G	Homeobox	0.22467	0.22467	17181
ENSMUSG00000012396	Nanog	Nanog homeobox	Homeobox	0.224425	0.016434	17185
ENSMUSG00000055435	Maf	avian musculoaponeurotic fibrosarcoma oncogene homolog	TF_bZIP	0.223949	0.0480665	17194
ENSMUSG00000052909	Gm9894	predicted gene 9894	zf-C2H2	0.218164	0.0248861	17265
ENSMUSG00000032446	Eomes	eomesodermin	T-box	0.2177	0.0310193	17271
ENSMUSG00000027985	Lef1	lymphoid enhancer binding factor 1	HMG	0.215621	0.0275799	17310
ENSMUSG00000048728	Zfp454	zinc finger protein 454	zf-C2H2	0.210451	0.0421177	17380
ENSMUSG00000096192	Gm18856	predicted gene, 18856	ZBTB	0.204732	0.148665	17474
ENSMUSG00000025902	Sox17	SRY (sex determining region Y)-box 17	HMG	0.196898	0.0311549	17618
ENSMUSG00000026890	Lhx6	LIM homeobox protein 6	Homeobox	0.19471	0.0214544	17660
ENSMUSG00000094942	Gm3604	predicted gene 3604	zf-C2H2	0.192261	0.033759	17699
ENSMUSG00000029754	Dlx6	distal-less homeobox 6	Homeobox	0.191305	0.0233524	17711
ENSMUSG00000035456	Prdm8	PR domain containing 8	zf-C2H2	0.191259	0.0217944	17712
ENSMUSG00000028654	Mycl	v-myc avian myelocytomatosis viral oncogene lung carcinoma derived	bHLH	0.190999	0.0577671	17717
ENSMUSG00000078872	Gm14401	predicted gene 14401	zf-C2H2	0.188618	0.050682	17769
ENSMUSG00000089857	Zfp882	zinc finger protein 882	zf-C2H2	0.188481	0.0372991	17774
ENSMUSG00000055874	Foxi3	forkhead box I3	Fork head	0.186544	0.0405792	17809
ENSMUSG00000063905	Gm10139	predicted gene 10139	zf-C2H2	0.185528	0.185528	17827
ENSMUSG00000070902	Zfp352	zinc finger protein 352	zf-C2H2	0.184825	0.0344129	17834
ENSMUSG00000024420	Zfp521	zinc finger protein 521	zf-C2H2	0.184714	0.050691	17835
ENSMUSG00000022330	Osr2	odd-skipped related 2	zf-C2H2	0.182412	0.0588973	17868
ENSMUSG00000025930	Msc	musculin	bHLH	0.18011	0.0565452	17914
ENSMUSG00000078875	Gm14419	predicted gene 14419	zf-C2H2	0.179426	0.0484746	17926
ENSMUSG00000000317	Bcl6b	B cell CLL/lymphoma 6, member B	ZBTB	0.179078	0.0252835	17932
ENSMUSG00000034968	Lbx2	ladybird homeobox 2	Homeobox	0.17744	0.0961897	17957
ENSMUSG00000034551	Hdx	highly divergent homeobox	Homeobox	0.17556	0.0131481	17993
ENSMUSG00000036192	Rorb	RAR-related orphan receptor beta	THR-like	0.172295	0.0384206	18062
ENSMUSG00000078869	Gm14409	predicted gene 14409	zf-C2H2	0.170421	0.0754508	18098
ENSMUSG00000027168	Pax6	paired box 6	PAX	0.170314	0.0729111	18101
ENSMUSG00000045991	Onecut2	one cut domain, family member 2	CUT	0.169754	0.014047	18116
ENSMUSG00000078898	Zfp968	zinc finger protein 968	zf-C2H2	0.169607	0.0781363	18120
ENSMUSG00000009097	Tbx1	T-box 1	T-box	0.168898	0.020778	18139
ENSMUSG00000003282	Plag1	pleiomorphic adenoma gene 1	zf-C2H2	0.167901	0.0438353	18154
ENSMUSG00000033837	Foxh1	forkhead box H1	Fork head	0.16757	0.059748	18166
ENSMUSG00000054191	Klf1	Kruppel-like factor 1 (erythroid)	zf-C2H2	0.165541	0.0304668	18196
ENSMUSG00000036139	Hoxc9	homeobox C9	Homeobox	0.165258	0.0319106	18204
ENSMUSG00000032318	Isl2	insulin related protein 2 (islet 2)	Homeobox	0.162537	0.0401368	18273
ENSMUSG00000037446	Tulp1	tubby like protein 1	Tub	0.161444	0.0407594	18297
ENSMUSG00000015053	Gata2	GATA binding protein 2	zf-GATA	0.160089	0.0585646	18341
ENSMUSG00000036098	Myrf	myelin regulatory factor	NDT80/PhoG	0.1594	0.0255914	18360
ENSMUSG00000001661	Hoxc6	homeobox C6	Homeobox	0.148265	0.0338182	18597
ENSMUSG00000038402	Foxf2	forkhead box F2	Fork head	0.147433	0.0198037	18620
ENSMUSG00000041287	Sox15	SRY (sex determining region Y)-box 15	HMG	0.147313	0.0276772	18625
ENSMUSG00000055210	Foxd2	forkhead box D2	Fork head	0.144045	0.0193775	18694
ENSMUSG00000027230	Creb3l1	cAMP responsive element binding protein 3-like 1	TF_bZIP	0.142939	0.0219714	18718
ENSMUSG00000066772	Obox3	oocyte specific homeobox 3	Homeobox	0.141713	0.0332015	18750
ENSMUSG00000047591	Mafa	v-maf musculoaponeurotic fibrosarcoma oncogene family, protein A (avian)	TF_bZIP	0.139485	0.0270215	18803
ENSMUSG00000021944	Gata4	GATA binding protein 4	zf-GATA	0.139088	0.0579794	18808
ENSMUSG00000067919	Rex2	reduced expression 2	zf-C2H2	0.13831	0.0363877	18825
ENSMUSG00000031189	Aff2	AF4/FMR2 family, member 2	AF-4	0.131414	0.0299448	18976
ENSMUSG00000074529	Zfp972	zinc finger protein 972	zf-C2H2	0.130903	0.0672414	18990
ENSMUSG00000030757	Zkscan2	zinc finger with KRAB and SCAN domains 2	zf-C2H2	0.130464	0.0368657	19001
ENSMUSG00000037621	Atoh8	atonal bHLH transcription factor 8	bHLH	0.129109	0.0338279	19035
ENSMUSG00000004872	Pax3	paired box 3	PAX	0.126972	0.0340915	19093
ENSMUSG00000030510	Cers3	ceramide synthase 3	Homeobox	0.126294	0.0181735	19116
ENSMUSG00000085111	Ascl4	achaete-scute family bHLH transcription factor 4	bHLH	0.123174	0.0228614	19189
ENSMUSG00000004842	Pou1f1	POU domain, class 1, transcription factor 1	Pou	0.123029	0.0362387	19193
ENSMUSG00000016458	Wt1	Wilms tumor 1 homolog	zf-C2H2	0.122229	0.0322165	19218
ENSMUSG00000073427	Gm4924	predicted gene 4924	zf-C2H2	0.121212	0.0279957	19242
ENSMUSG00000017688	Hnf4g	hepatocyte nuclear factor 4, gamma	RXR-like	0.119411	0.0199794	19301
ENSMUSG00000042589	Cux2	cut-like homeobox 2	CUT	0.118663	0.0384397	19324
ENSMUSG00000000093	Tbx2	T-box 2	T-box	0.115871	0.0172163	19405
ENSMUSG00000008193	Spib	Spi-B transcription factor (Spi-1/PU.1 related)	ETS	0.115658	0.0311023	19410
ENSMUSG00000070495	Ctcfl	CCCTC-binding factor (zinc finger protein)-like	zf-C2H2	0.115275	0.0245658	19419
ENSMUSG00000024176	Sox8	SRY (sex determining region Y)-box 8	HMG	0.113816	0.0187988	19469
ENSMUSG00000074832	2410141K09Rik	RIKEN cDNA 2410141K09 gene	zf-C2H2	0.113584	0.0703792	19475
ENSMUSG00000063060	Sox7	SRY (sex determining region Y)-box 7	HMG	0.113215	0.0201403	19490
ENSMUSG00000092335	Zfp977	zinc finger protein 977	zf-C2H2	0.112798	0.0237873	19504
ENSMUSG00000028023	Pitx2	paired-like homeodomain transcription factor 2	Homeobox	0.111826	0.0149156	19535
ENSMUSG00000050368	Hoxd10	homeobox D10	Homeobox	0.111678	0.0314274	19542
ENSMUSG00000023391	Dlx2	distal-less homeobox 2	Homeobox	0.111467	0.0159203	19549
ENSMUSG00000078878	Gm14305	predicted gene 14305	zf-C2H2	0.109257	0.103701	19613
ENSMUSG00000035187	Nkx6-1	NK6 homeobox 1	Homeobox	0.108775	0.0171165	19637
ENSMUSG00000043099	Hic1	hypermethylated in cancer 1	ZBTB	0.107255	0.019451	19682
ENSMUSG00000038630	Zkscan16	zinc finger with KRAB and SCAN domains 16	zf-C2H2	0.0999603	0.0111794	19949
ENSMUSG00000074731	Zfp345	zinc finger protein 345	zf-C2H2	0.0985649	0.0158303	20002
ENSMUSG00000035951	Ascl3	achaete-scute family bHLH transcription factor 3	bHLH	0.0956107	0.0488116	20127
ENSMUSG00000033249	Hsf4	heat shock transcription factor 4	HSF	0.0943672	0.0247399	20180
ENSMUSG00000033730	Egr3	early growth response 3	zf-C2H2	0.0934645	0.0157002	20217
ENSMUSG00000097918	Ascl5	achaete-scute family bHLH transcription factor 5	bHLH	0.0934399	0.0503403	20218
ENSMUSG00000001510	Dlx3	distal-less homeobox 3	Homeobox	0.0929081	0.030233	20239
ENSMUSG00000062518	Zfp534	zinc finger protein 534	zf-C2H2	0.0919585	0.0232727	20276
ENSMUSG00000090744	Gm6871	predicted gene 6871	zf-C2H2	0.0891331	0.046486	20402
ENSMUSG00000078902	Gm14443	predicted gene 14443	zf-C2H2	0.0858196	0.0202089	20523
ENSMUSG00000099216	Obox8	oocyte specific homeobox 8	Homeobox	0.0857271	0.0194128	20528
ENSMUSG00000041578	Crx	cone-rod homeobox	TF_Otx	0.0853803	0.0197746	20549
ENSMUSG00000022987	Zfp641	zinc finger protein 641	zf-C2H2	0.084611	0.0160071	20591
ENSMUSG00000029556	Hnf1a	HNF1 homeobox A	Homeobox	0.0833001	0.0177918	20651
ENSMUSG00000079633	Rhox4d	reproductive homeobox 4D	Homeobox	0.0828141	0.0167407	20674
ENSMUSG00000078906	Gm14444	predicted gene 14444	zf-C2H2	0.0814364	0.0439414	20728
ENSMUSG00000058537	AW822073	expressed sequence AW822073	Homeobox	0.0804638	0.0303448	20779
ENSMUSG00000029553	Tfec	transcription factor EC	bHLH	0.0800125	0.0356546	20796
ENSMUSG00000018973	Hoxb1	homeobox B1	Homeobox	0.0798227	0.0168298	20804
ENSMUSG00000055202	Zfp811	zinc finger protein 811	zf-C2H2	0.0797715	0.0268482	20808
ENSMUSG00000093910	Zfp853	zinc finger protein 853	zf-C2H2	0.0787246	0.00915849	20857
ENSMUSG00000090125	Pou3f1	POU domain, class 3, transcription factor 1	Pou	0.0779161	0.00782544	20902
ENSMUSG00000022484	Hoxc10	homeobox C10	Homeobox	0.0761334	0.0178894	20976
ENSMUSG00000047143	Dmrta2	doublesex and mab-3 related transcription factor like family A2	DM	0.0754541	0.0132466	21013
ENSMUSG00000074502	Ubtfl1	upstream binding transcription factor, RNA polymerase I-like 1	HMG	0.0740646	0.0103274	21096
ENSMUSG00000078498	Zfp988	zinc finger protein 988	zf-C2H2	0.073447	0.0142389	21131
ENSMUSG00000029595	Lhx5	LIM homeobox protein 5	Homeobox	0.0722348	0.0223282	21189
ENSMUSG00000027186	Elf5	E74-like factor 5	ETS	0.0691295	0.0269878	21380
ENSMUSG00000023443	Esx1	extraembryonic, spermatogenesis, homeobox 1	Homeobox	0.0687243	0.0112654	21404
ENSMUSG00000003949	Hlf	hepatic leukemia factor	TF_bZIP	0.06814	0.0153717	21442
ENSMUSG00000009248	Ascl2	achaete-scute family bHLH transcription factor 2	bHLH	0.0678471	0.0239748	21465
ENSMUSG00000061911	Myt1l	myelin transcription factor 1-like	zf-C2HC	0.0669331	0.0433539	21518
ENSMUSG00000004359	Spic	Spi-C transcription factor (Spi-1/PU.1 related)	ETS	0.0633099	0.0246824	21708
ENSMUSG00000027833	Shox2	short stature homeobox 2	Homeobox	0.0628029	0.0138229	21744
ENSMUSG00000030543	Mesp2	mesoderm posterior 2	bHLH	0.06055	0.0196366	21887
ENSMUSG00000032419	Tbx18	T-box18	T-box	0.0594431	0.0127196	21954
ENSMUSG00000001496	Nkx2-1	NK2 homeobox 1	Homeobox	0.0589004	0.0177573	22000
ENSMUSG00000027547	Sall4	spalt like transcription factor 4	zf-C2H2	0.0577491	0.0545598	22092
ENSMUSG00000010505	Myt1	myelin transcription factor 1	zf-C2HC	0.0575316	0.0424554	22110
ENSMUSG00000018263	Tbx5	T-box 5	T-box	0.0553908	0.01789	22275
ENSMUSG00000033726	Emx1	empty spiracles homeobox 1	Homeobox	0.054486	0.0203559	22351
ENSMUSG00000058794	Nfe2	nuclear factor, erythroid derived 2	TF_bZIP	0.0541974	0.00706039	22372
ENSMUSG00000075304	Sp5	trans-acting transcription factor 5	zf-C2H2	0.0536379	0.0114118	22406
ENSMUSG00000058669	Nkx2-9	NK2 homeobox 9	Homeobox	0.0536245	0.0176244	22409
ENSMUSG00000079009	Gm14139	predicted gene 14139	zf-C2H2	0.0526362	0.0235065	22486
ENSMUSG00000034777	Vax2	ventral anterior homeobox 2	Homeobox	0.051965	0.0264515	22551
ENSMUSG00000060314	Zfp941	zinc finger protein 941	zf-C2H2	0.050743	0.0116493	22653
ENSMUSG00000039699	Batf2	basic leucine zipper transcription factor, ATF-like 2	TF_bZIP	0.0497817	0.0233829	22740
ENSMUSG00000019230	Lhx9	LIM homeobox protein 9	Homeobox	0.0496655	0.0137172	22752
ENSMUSG00000041309	Nkx6-2	NK6 homeobox 2	Homeobox	0.0494902	0.0208522	22766
ENSMUSG00000026686	Lmx1a	LIM homeobox transcription factor 1 alpha	Homeobox	0.0493731	0.0111618	22781
ENSMUSG00000061517	Sox21	SRY (sex determining region Y)-box 21	HMG	0.0492308	0.0109426	22805
ENSMUSG00000041565	L3mbtl4	L3MBTL4 histone methyl-lysine binding protein	zf-C2HC	0.0478133	0.0125714	22938
ENSMUSG00000078497	Zfp978	zinc finger protein 978	zf-C2H2	0.0473366	0.0259922	22986
ENSMUSG00000040632	Nrl	neural retina leucine zipper gene	TF_bZIP	0.0466374	0.0077605	23047
ENSMUSG00000041703	Zic5	zinc finger protein of the cerebellum 5	zf-C2H2	0.0461866	0.0286539	23090
ENSMUSG00000020871	Dlx4	distal-less homeobox 4	Homeobox	0.0455401	0.0168229	23149
ENSMUSG00000034057	Myrfl	myelin regulatory factor-like	NDT80/PhoG	0.0451198	0.00995712	23203
ENSMUSG00000020950	Foxg1	forkhead box G1	Fork head	0.0447975	0.0117753	23229
ENSMUSG00000058883	Zfp708	zinc finger protein 708	zf-C2H2	0.0447769	0.0447769	23232
ENSMUSG00000029736	Nobox	NOBOX oogenesis homeobox	Homeobox	0.0420099	0.0160093	23493
ENSMUSG00000008496	Pou2f2	POU domain, class 2, transcription factor 2	Pou	0.0419556	0.00975666	23500
ENSMUSG00000035934	Pknox2	Pbx/knotted 1 homeobox 2	Homeobox	0.0415558	0.0197161	23536
ENSMUSG00000068962	Zfp114	zinc finger protein 114	zf-C2H2	0.0410424	0.00947638	23589
ENSMUSG00000031079	Zfp300	zinc finger protein 300	zf-C2H2	0.0400844	0.00619559	23677
ENSMUSG00000028341	Nr4a3	nuclear receptor subfamily 4, group A, member 3	NGFIB-like	0.0398702	0.00793882	23703
ENSMUSG00000031028	Tub	tubby bipartite transcription factor	Tub	0.03931	0.0115204	23772
ENSMUSG00000039410	Prdm16	PR domain containing 16	zf-C2H2	0.0390581	0.0274494	23805
ENSMUSG00000019803	Nr2e1	nuclear receptor subfamily 2, group E, member 1	RXR-like	0.0389706	0.0282265	23813
ENSMUSG00000017007	Rbpjl	recombination signal binding protein for immunoglobulin kappa J region-like	CSL	0.0386079	0.012482	23856
ENSMUSG00000045518	Onecut3	one cut domain, family member 3	CUT	0.0384286	0.00703704	23881
ENSMUSG00000029546	Uncx	UNC homeobox	Homeobox	0.0375812	0.00931094	23974
ENSMUSG00000045515	Pou3f3	POU domain, class 3, transcription factor 3	Pou	0.037354	0.00909022	24008
ENSMUSG00000041911	Dlx1	distal-less homeobox 1	Homeobox	0.0370084	0.00891151	24041
ENSMUSG00000074607	Tox2	TOX high mobility group box family member 2	HMG	0.0370017	0.0292227	24043
ENSMUSG00000025407	Gli1	GLI-Kruppel family member GLI1	zf-C2H2	0.0368968	0.0119109	24054
ENSMUSG00000025529	Zfp711	zinc finger protein 711	zf-C2H2	0.0368719	0.0153335	24057
ENSMUSG00000095648	Gm2004	predicted gene 2004	zf-C2H2	0.0363891	0.0130753	24109
ENSMUSG00000021506	Pitx1	paired-like homeodomain transcription factor 1	Homeobox	0.035972	0.0111341	24157
ENSMUSG00000078500	Zfp986	zinc finger protein 986	zf-C2H2	0.0354316	0.0354316	24221
ENSMUSG00000043753	Dmrta1	doublesex and mab-3 related transcription factor like family A1	DM	0.0353071	0.00744134	24238
ENSMUSG00000060630	Zfp735	zinc finger protein 735	zf-C2H2	0.0352133	0.0352133	24251
ENSMUSG00000074366	Obox5	oocyte specific homeobox 5	Homeobox	0.034766	0.0193647	24295
ENSMUSG00000075045	Gm4981	predicted gene 4981	Homeobox	0.0346691	0.0139744	24307
ENSMUSG00000023333	Gcm1	glial cells missing homolog 1	GCM	0.0346395	0.0118385	24312
ENSMUSG00000053909	Rhox10	reproductive homeobox 10	Homeobox	0.0344658	0.0168678	24333
ENSMUSG00000024518	Rax	retina and anterior neural fold homeobox	Homeobox	0.0343849	0.0118509	24343
ENSMUSG00000015627	Gata5	GATA binding protein 5	zf-GATA	0.0340243	0.0114605	24383
ENSMUSG00000046532	Ar	androgen receptor	ESR-like	0.0339805	0.00792163	24391
ENSMUSG00000035576	L3mbtl1	L3MBTL1 histone methyl-lysine binding protein	zf-C2HC	0.0334057	0.0101403	24468
ENSMUSG00000024134	Six2	sine oculis-related homeobox 2	Homeobox	0.0333051	0.0159681	24479
ENSMUSG00000024619	Cdx1	caudal type homeobox 1	Homeobox	0.0327486	0.0111597	24551
ENSMUSG00000026586	Prrx1	paired related homeobox 1	Homeobox	0.032678	0.00951912	24558
ENSMUSG00000025927	Tfap2b	transcription factor AP-2 beta	AP-2	0.0325915	0.00600933	24563
ENSMUSG00000010476	Ebf3	early B cell factor 3	COE	0.0322419	0.0113551	24620
ENSMUSG00000029026	Trp73	transformation related protein 73	P53	0.0318987	0.0151595	24667
ENSMUSG00000005583	Mef2c	myocyte enhancer factor 2C	SRF	0.0313783	0.0134785	24749
ENSMUSG00000078897	Gm4724	predicted gene 4724	zf-C2H2	0.0312159	0.0312159	24780
ENSMUSG00000044243	Bhlha9	basic helix-loop-helix family, member a9	bHLH	0.0312097	0.0172271	24783
ENSMUSG00000023902	Zscan10	zinc finger and SCAN domain containing 10	zf-C2H2	0.03054	0.0255241	24867
ENSMUSG00000048502	Duxbl1	double homeobox B-like 1	Homeobox	0.0305124	0.013337	24873
ENSMUSG00000047861	Foxi1	forkhead box I1	Fork head	0.0301971	0.0118429	24921
ENSMUSG00000062588	Gm6104	predicted gene 6104	HMG	0.0301	0.0301	24940
ENSMUSG00000091594	Gm17067	predicted gene 17067	zf-C2H2	0.0295433	0.00899999	25007
ENSMUSG00000072675	Duxbl2	double homeobox B-like 2	Homeobox	0.0295178	0.023861	25012
ENSMUSG00000050100	Hmx2	H6 homeobox 2	Homeobox	0.0295028	0.00733073	25016
ENSMUSG00000034486	Gbx2	gastrulation brain homeobox 2	Homeobox	0.0291169	0.0156541	25065
ENSMUSG00000027967	Neurog2	neurogenin 2	bHLH	0.0287337	0.0135267	25124
ENSMUSG00000001657	Hoxc8	homeobox C8	Homeobox	0.0280461	0.00871317	25213
ENSMUSG00000028940	Hes2	hes family bHLH transcription factor 2	bHLH	0.0279736	0.0114789	25225
ENSMUSG00000022485	Hoxc5	homeobox C5	Homeobox	0.027878	0.0185285	25240
ENSMUSG00000015843	Rxrg	retinoid X receptor gamma	RXR-like	0.0273829	0.0134427	25313
ENSMUSG00000026468	Lhx4	LIM homeobox protein 4	Homeobox	0.0271822	0.00630507	25351
ENSMUSG00000051910	Sox6	SRY (sex determining region Y)-box 6	HMG	0.0269331	0.00506734	25385
[truncated: 326 more rows]

## Sheet: allTransporters
Ensembl_gene_ID	Gene_symbol	Description	Transporters	Mean (TPM)	S.E.M.	Rank
[truncated: 471 more rows]

[truncated: 3 more sheets: allIonchannels, allGPCRs, CiliaryGPCRs]
