# Supplementary material for: Doxycycline Changes the Transcriptome Profile of mIMCD3 Renal Epithelial Cells
Source: Front Physiol. 2021 Nov 5;12:771691. doi: 10.3389/fphys.2021.771691 (PMC8602682; doi:10.3389/fphys.2021.771691)
Supplement: Supplementary file 2 [file Table_2.XLSX]

## Sheet: DEGs_mIMCD3_DOX
			3 Days DOX treated mIMCD3			6 Days DOX treated mIMCD3			DMSO comparison			DOX comparison
Ensembl_gene_ID	Gene_symbol	Description	Log2Ratio 3D (DOX/DMSO)	FDR 3D	FDR 3D 20% threshold	Log2Ratio 6D (DOX/DMSO)	FDR 6D	FDR 6D 20% threshold	Log2Ratio DMSO (6D/3D)	FDR DMSO	FDR DMSO 20% threshold	Log2Ratio DOX (6D/3D)	FDR DOX	FDR DOX 20% threshold
ENSMUSG00000041301	Cftr	cystic fibrosis transmembrane conductance regulator	0.262747	0.354082	0.793642	0.508292	0.0489391	0.185722	0.310076	0.477928	0.999994	0.555621	0.050817	0.323629
ENSMUSG00000029797	Sspo	SCO-spondin	2.07883	4.20757e-06	2.07103e-05	4.24925	1.27318e-10	2.96329e-10	-0.790924	0.26031	0.999994	1.3795	0.000103885	0.00114648
ENSMUSG00000037949	Ano10	anoctamin 10	0.0794741	0.295247	0.999996	0.361633	3.26087e-05	0.0688859	0.0580357	0.641354	0.999994	0.340194	0.000282928	0.30362
ENSMUSG00000064210	Ano6	anoctamin 6	-0.397332	0.00010696	0.0639359	-0.360836	0.000197276	0.106135	-0.171375	0.198638	0.999994	-0.134878	0.152283	0.999996
ENSMUSG00000034863	Ano8	anoctamin 8	-0.211253	0.0723355	0.90491	0.219692	0.0541708	0.804016	-0.135625	0.45674	0.999994	0.29532	0.0210603	0.769513
ENSMUSG00000054662	Ano9	anoctamin 9	-0.347325	0.00955579	0.318371	-0.319674	0.012381	0.346255	0.0816609	0.701851	0.999994	0.109312	0.452112	0.999996
ENSMUSG00000004655	Aqp1	aquaporin 1	-1.19017	0.00632548	0.0286976	-0.865795	0.0250405	0.0815081	0.183974	0.777104	0.999994	0.508345	0.274255	0.844328
ENSMUSG00000042797	Aqp11	aquaporin 11	0.434152	0.215195	0.549803	0.398325	0.24596	0.54111	-0.0220494	0.97385	0.999994	-0.0578772	0.892202	0.999996
ENSMUSG00000034656	Cacna1a	calcium channel, voltage-dependent, P/Q type, alpha 1A subunit	0.612394	0.055964	0.219525	0.234162	0.474663	0.858252	-0.0186003	0.975294	0.999994	-0.396833	0.241746	0.823136
ENSMUSG00000020866	Cacna1g	calcium channel, voltage-dependent, T type, alpha 1G subunit	-0.824295	0.0217684	0.10176	-0.509469	0.14908	0.370911	-0.405324	0.445997	0.999994	-0.0904975	0.84416	0.999996
ENSMUSG00000020882	Cacnb1	calcium channel, voltage-dependent, beta 1 subunit	-0.280465	0.442832	0.862187	-0.144782	0.683524	0.999999	0.239754	0.674123	0.999994	0.375437	0.328843	0.951762
ENSMUSG00000003352	Cacnb3	calcium channel, voltage-dependent, beta 3 subunit	-0.11198	0.186601	0.999996	0.0324195	0.719479	0.999999	-0.019509	0.903373	0.999994	0.12489	0.17135	0.999996
ENSMUSG00000033486	Catsper2	cation channel, sperm associated 2	0.217276	0.27942	0.834764	0.58881	0.0041812	0.0372993	-0.213385	0.513857	0.999994	0.158149	0.466394	0.999996
ENSMUSG00000048003	Catsper4	cation channel, sperm associated 4	0.254462	0.427491	0.860367	0.0254121	0.941412	0.999999	0.283631	0.570693	0.999994	0.0545818	0.88757	0.999996
ENSMUSG00000022843	Clcn2	chloride channel, voltage-sensitive 2	-0.172128	0.248861	0.995918	0.0469621	0.76412	0.999999	0.0632484	0.81196	0.999994	0.282338	0.074639	0.871776
ENSMUSG00000004319	Clcn3	chloride channel, voltage-sensitive 3	-0.136892	0.0771081	0.999996	-0.218887	0.00575352	0.904208	-0.0735067	0.553168	0.999994	-0.155501	0.0636147	0.999996
ENSMUSG00000000605	Clcn4	chloride channel, voltage-sensitive 4	-0.189482	0.0335854	0.999996	-0.0943854	0.277934	0.999999	-0.0888544	0.524824	0.999994	0.00624201	0.956671	0.999996
ENSMUSG00000004317	Clcn5	chloride channel, voltage-sensitive 5	-0.0786466	0.341986	0.999996	0.0122056	0.89468	0.999999	-0.159913	0.206575	0.999994	-0.0690605	0.450624	0.999996
ENSMUSG00000029016	Clcn6	chloride channel, voltage-sensitive 6	0.0379019	0.779087	0.999996	0.140633	0.241912	0.999999	-0.0137243	0.955317	0.999994	0.0890064	0.519474	0.999996
ENSMUSG00000036636	Clcn7	chloride channel, voltage-sensitive 7	0.0603747	0.587527	0.999996	0.433576	0.000207924	0.0351295	0.0125484	0.952829	0.999994	0.38575	0.00179309	0.248652
ENSMUSG00000007041	Clic1	chloride intracellular channel 1	-0.052541	0.487187	0.999996	-0.330075	8.24961e-05	0.159513	0.0676318	0.563612	0.999994	-0.209902	0.0102851	0.999996
ENSMUSG00000037242	Clic4	chloride intracellular channel 4 (mitochondrial)	0.0406997	0.579391	0.999996	0.123944	0.0703109	0.999999	0.00947046	0.947555	0.999994	0.0927148	0.219609	0.999996
ENSMUSG00000023959	Clic5	chloride intracellular channel 5	0.290782	0.0132475	0.525108	0.542161	3.66787e-05	0.00402198	0.0200263	0.930782	0.999994	0.271405	0.0247504	0.900213
ENSMUSG00000030102	Itpr1	inositol 1,4,5-trisphosphate receptor 1	-0.307937	0.00532756	0.425138	0.158452	0.119508	0.999999	-0.168899	0.297952	0.999994	0.29749	0.0107473	0.7348
ENSMUSG00000030287	Itpr2	inositol 1,4,5-triphosphate receptor 2	0.0655099	0.435346	0.999996	0.426791	1.54905e-05	0.014395	-0.234511	0.0923069	0.999994	0.12677	0.147208	0.999996
ENSMUSG00000042644	Itpr3	inositol 1,4,5-triphosphate receptor 3	-0.211113	0.0283322	0.954021	0.0401909	0.687751	0.999999	-0.112187	0.445858	0.999994	0.139117	0.173281	0.999996
ENSMUSG00000062785	Kcnc3	potassium voltage gated channel, Shaw-related subfamily, member 3	0.210654	0.395736	0.885192	0.359618	0.14914	0.44035	-0.472149	0.229078	0.999994	-0.323185	0.21978	0.865572
ENSMUSG00000051726	Kcnf1	potassium voltage-gated channel, subfamily F, member 1	-1.03305	0.0225503	0.0880286	-1.615	0.0017316	0.0054386	-0.296787	0.671689	0.999994	-0.878734	0.11638	0.443203
ENSMUSG00000038319	Kcnh2	potassium voltage-gated channel, subfamily H (eag-related), member 2	0.156916	0.608953	0.999996	0.401497	0.152314	0.412586	-0.0352543	0.952829	0.999994	0.209326	0.51364	0.999996
ENSMUSG00000062609	Kcnj15	potassium inwardly-rectifying channel, subfamily J, member 15	-1.35205	6.34415e-05	0.000428732	-0.462485	0.0623786	0.23615	-0.153674	0.709894	0.999994	0.735887	0.0166239	0.13103
ENSMUSG00000086228	Ubap1l	ubiquitin-associated protein 1-like	1.59392	0.000691387	0.00341181	3.72989	1.55629e-07	4.08215e-07	-1.71388	0.101227	0.999994	0.422091	0.26058	0.840857
ENSMUSG00000041695	Kcnj2	potassium inwardly-rectifying channel, subfamily J, member 2	-0.993733	0.0500069	0.163582	-0.676332	0.141307	0.327086	0.130257	0.878427	0.999994	0.447658	0.445428	0.999996
ENSMUSG00000044216	Kcnj4	potassium inwardly-rectifying channel, subfamily J, member 4	-0.0468442	0.87025	0.999996	1.45908	3.76229e-06	2.2024e-05	-0.480065	0.239236	0.999994	1.02586	0.000564243	0.00823635
ENSMUSG00000033998	Kcnk1	potassium channel, subfamily K, member 1	-0.212012	0.00906069	0.999996	0.0744273	0.336269	0.999999	-0.04041	0.764977	0.999994	0.246029	0.00551928	0.999996
ENSMUSG00000033854	Kcnk10	potassium channel, subfamily K, member 10	0.334911	0.388217	0.791482	0.296177	0.433377	0.793382	0.0317513	0.966674	0.999994	-0.0069831	0.988037	0.999996
ENSMUSG00000026674	Ddr2	discoidin domain receptor family, member 2	2.65184	1.18929e-06	4.62532e-06	4.45482	1.0275e-09	2.47478e-09	-1.0363	0.245565	0.999994	0.766689	0.0194269	0.141324
ENSMUSG00000023243	Kcnk5	potassium channel, subfamily K, member 5	-0.414902	0.000307736	0.0696701	-0.278097	0.00613236	0.500839	-0.00674657	0.97113	0.999994	0.130058	0.236055	0.999996
ENSMUSG00000052276	Ostn	osteocrin	2.22902	7.18916e-06	3.15939e-05	3.93046	2.4226e-09	5.70045e-09	-0.772593	0.346733	0.999994	0.928847	0.00534141	0.0523363
ENSMUSG00000009545	Kcnq1	potassium voltage-gated channel, subfamily Q, member 1	-0.262302	0.200243	0.702509	-0.475811	0.0188931	0.130919	0.110788	0.749688	0.999994	-0.102721	0.676807	0.999996
ENSMUSG00000007476	Lrrc8a	leucine rich repeat containing 8A	-0.513253	0.00047557	0.0272631	-0.234996	0.062447	0.721631	-0.135884	0.497778	0.999994	0.142374	0.318814	0.999996
ENSMUSG00000070639	Lrrc8b	leucine rich repeat containing 8 family, member B	-0.435653	0.000148641	0.0403467	-0.377318	0.000427839	0.0978992	-0.149871	0.32019	0.999994	-0.0915357	0.402779	0.999996
ENSMUSG00000054720	Lrrc8c	leucine rich repeat containing 8 family, member C	-0.199223	0.0945609	0.949715	-0.18825	0.108222	0.930592	-0.102979	0.592234	0.999994	-0.0920064	0.498093	0.999996
ENSMUSG00000046079	Lrrc8d	leucine rich repeat containing 8D	-0.0523393	0.490101	0.999996	0.210331	0.00508419	0.970027	-0.1337	0.237962	0.999994	0.12897	0.10184	0.999996
ENSMUSG00000046589	Lrrc8e	leucine rich repeat containing 8 family, member E	-0.0864284	0.43697	0.999996	0.176659	0.0908348	0.999999	-0.0225949	0.913184	0.999994	0.240493	0.0384075	0.999996
ENSMUSG00000004567	Mcoln1	mucolipin 1	0.168496	0.0582932	0.999996	0.367341	0.000183001	0.0935112	0.087776	0.535088	0.999994	0.286621	0.00426489	0.774179
ENSMUSG00000014444	Piezo1	piezo-type mechanosensitive ion channel component 1	-0.319266	0.000645964	0.309574	-0.0595279	0.48094	0.999999	-0.156435	0.225714	0.999994	0.103303	0.257575	0.999996
ENSMUSG00000095339	Zscan4b	zinc finger and SCAN domain containing 4B	-2.49573	0.0155771	0.0486068	-4.41562	0.00292029	0.00666002	-0.418247	0.7553	0.999994	-2.33814	0.221438	0.643687
ENSMUSG00000034462	Pkd2	polycystic kidney disease 2	-0.139707	0.0779439	0.999996	-0.168883	0.03196	0.999999	-0.13342	0.276086	0.999994	-0.162596	0.0587004	0.999996
ENSMUSG00000019194	Scn1b	sodium channel, voltage-gated, type I, beta	0.195801	0.663508	0.999996	1.96809	3.69029e-05	0.000131464	-0.571776	0.413831	0.999994	1.20052	0.00504628	0.0386229
ENSMUSG00000021751	Acox2	acyl-Coenzyme A oxidase 2, branched chain	1.99915	2.30779e-09	1.07018e-08	3.36368	4.11206e-13	8.5687e-13	-0.352241	0.390688	0.999994	1.01229	8.81057e-06	0.000175864
ENSMUSG00000040613	Apobec1	apolipoprotein B mRNA editing enzyme, catalytic polypeptide 1	1.20264	0.00182227	0.0100655	2.5525	1.06955e-07	3.5196e-07	-0.183478	0.802338	0.999994	1.16638	0.000977959	0.0105487
ENSMUSG00000048677	Tpcn2	two pore segment channel 2	-0.197381	0.3604	0.900062	-0.0630365	0.781809	0.999999	-0.00503359	0.98963	0.999994	0.129311	0.599783	0.999996
ENSMUSG00000025432	Avil	advillin	3.29776	6.78005e-11	2.48478e-10	4.62088	3.10229e-13	6.69339e-13	-0.535414	0.366619	0.999994	0.787708	0.00032461	0.00756221
ENSMUSG00000032839	Trpc1	transient receptor potential cation channel, subfamily C, member 1	-0.129047	0.293794	0.999996	-0.0764427	0.534326	0.999999	0.00424489	0.985399	0.999994	0.056849	0.694408	0.999996
ENSMUSG00000052387	Trpm3	transient receptor potential cation channel, subfamily M, member 3	-0.331442	0.280598	0.672366	0.376233	0.221701	0.517841	-0.58448	0.22489	0.999994	0.123195	0.739569	0.999996
ENSMUSG00000038260	Trpm4	transient receptor potential cation channel, subfamily M, member 4	-0.390009	0.000353531	0.102107	-0.196806	0.0357008	0.961083	-0.0409179	0.810318	0.999994	0.152285	0.142132	0.999996
ENSMUSG00000024727	Trpm6	transient receptor potential cation channel, subfamily M, member 6	-0.403582	0.00121117	0.121682	-0.164682	0.141539	0.999999	-0.24651	0.164329	0.999994	-0.00760949	0.959154	0.999996
ENSMUSG00000027365	Trpm7	transient receptor potential cation channel, subfamily M, member 7	0.0501052	0.489655	0.999996	0.0496887	0.48232	0.999999	0.0283389	0.827123	0.999994	0.0279224	0.740836	0.999996
ENSMUSG00000046607	Hrk	harakiri, BCL2 interacting protein (contains only BH3 domain)	1.52156	0.000249534	0.001387	2.79951	9.89846e-08	3.04944e-07	-0.593681	0.417218	0.999994	0.684269	0.0337243	0.215225
ENSMUSG00000014158	Trpv4	transient receptor potential cation channel, subfamily V, member 4	-0.421219	6.40908e-05	0.0363746	-0.114908	0.177342	0.999999	-0.121938	0.362883	0.999994	0.184373	0.0515757	0.999996
ENSMUSG00000020402	Vdac1	voltage-dependent anion channel 1	0.105496	0.149212	0.999996	-0.094198	0.18978	0.999999	0.0493317	0.687941	0.999994	-0.150363	0.0576115	0.999996
ENSMUSG00000021771	Vdac2	voltage-dependent anion channel 2	0.292012	0.00256819	0.48226	-0.0871485	0.330829	0.999999	0.128657	0.357069	0.999994	-0.250504	0.0123743	0.999996
ENSMUSG00000008892	Vdac3	voltage-dependent anion channel 3	0.337141	0.00120231	0.261148	0.0653657	0.495	0.999999	0.134921	0.358144	0.999994	-0.136854	0.178734	0.999996
ENSMUSG00000026944	Abca2	ATP-binding cassette, sub-family A (ABC1), member 2	-0.300491	0.0182989	0.491762	0.173032	0.151607	0.978947	-0.16354	0.394309	0.999994	0.309983	0.0229215	0.701186
ENSMUSG00000024130	Abca3	ATP-binding cassette, sub-family A (ABC1), member 3	-0.194085	0.0214783	0.999996	0.0294333	0.740278	0.999999	-0.121081	0.344652	0.999994	0.102437	0.256026	0.999996
ENSMUSG00000028125	Abca4	ATP-binding cassette, sub-family A (ABC1), member 4	-0.783465	0.00216326	0.0181709	-0.127058	0.606748	0.999999	-0.485184	0.177655	0.999994	0.171222	0.537561	0.999996
ENSMUSG00000018800	Abca5	ATP-binding cassette, sub-family A (ABC1), member 5	0.162289	0.104967	0.999996	0.132975	0.171943	0.999999	0.0550033	0.754799	0.999994	0.0256894	0.834281	0.999996
ENSMUSG00000035722	Abca7	ATP-binding cassette, sub-family A (ABC1), member 7	-0.294731	0.00314956	0.473633	-0.0365315	0.712279	0.999999	-0.121719	0.399514	0.999994	0.136481	0.176263	0.999996
ENSMUSG00000031974	Abcb10	ATP-binding cassette, sub-family B (MDR/TAP), member 10	-0.0891342	0.358995	0.999996	0.142858	0.121414	0.999999	0.00725889	0.967745	0.999994	0.239251	0.0213532	0.999996
ENSMUSG00000042476	Abcb4	ATP-binding cassette, sub-family B (MDR/TAP), member 4	-0.20433	0.458844	0.924914	-0.74941	0.00765944	0.0362232	0.0345488	0.949588	0.999994	-0.510531	0.0923368	0.463203
ENSMUSG00000026198	Abcb6	ATP-binding cassette, sub-family B (MDR/TAP), member 6	-0.183137	0.126626	0.999996	0.0969836	0.408244	0.999999	0.0494954	0.819081	0.999994	0.329616	0.0124517	0.581265
ENSMUSG00000031333	Abcb7	ATP-binding cassette, sub-family B (MDR/TAP), member 7	0.0660701	0.534977	0.999996	0.0415397	0.700734	0.999999	0.0326394	0.866742	0.999994	0.00810896	0.950973	0.999996
ENSMUSG00000028973	Abcb8	ATP-binding cassette, sub-family B (MDR/TAP), member 8	-0.0176706	0.829989	0.999996	0.138427	0.0548299	0.999999	0.0420443	0.742866	0.999994	0.198142	0.0147793	0.999996
ENSMUSG00000029408	Abcb9	ATP-binding cassette, sub-family B (MDR/TAP), member 9	0.00890225	0.969153	0.999996	0.0968011	0.636881	0.999999	0.170301	0.60085	0.999994	0.2582	0.231404	0.999996
ENSMUSG00000023088	Abcc1	ATP-binding cassette, sub-family C (CFTR/MRP), member 1	-0.176969	0.0783945	0.999996	0.112676	0.254105	0.999999	-0.074195	0.656499	0.999994	0.21545	0.0473659	0.999996
ENSMUSG00000032842	Abcc10	ATP-binding cassette, sub-family C (CFTR/MRP), member 10	0.181563	0.29933	0.942407	0.317178	0.0648196	0.423614	-0.16571	0.560212	0.999994	-0.0300953	0.890077	0.999996
ENSMUSG00000025194	Abcc2	ATP-binding cassette, sub-family C (CFTR/MRP), member 2	-0.638981	0.456474	0.822529	-0.870728	0.253488	0.482781	0.454351	0.723549	0.999994	0.222603	0.83333	0.999996
ENSMUSG00000028838	Extl1	exostoses (multiple)-like 1	1.51087	7.08446e-05	0.000440606	2.74101	1.0103e-08	3.12195e-08	-0.24003	0.711562	0.999994	0.990113	0.00131673	0.0166413
ENSMUSG00000032849	Abcc4	ATP-binding cassette, sub-family C (CFTR/MRP), member 4	-0.0894372	0.340883	0.999996	0.000589699	0.995966	0.999999	-0.235504	0.121592	0.999994	-0.145477	0.147013	0.999996
ENSMUSG00000022822	Abcc5	ATP-binding cassette, sub-family C (CFTR/MRP), member 5	0.0992708	0.294262	0.999996	0.347391	0.000570893	0.161932	-0.0486212	0.766997	0.999994	0.199499	0.0461029	0.999996
ENSMUSG00000031378	Abcd1	ATP-binding cassette, sub-family D (ALD), member 1	-0.327764	0.0412511	0.440643	0.173775	0.270522	0.915876	-0.334509	0.176793	0.999994	0.16703	0.341298	0.999996
ENSMUSG00000028127	Abcd3	ATP-binding cassette, sub-family D (ALD), member 3	-0.217701	0.00342277	0.999737	-0.247396	0.000927956	0.722365	-0.0151887	0.909247	0.999994	-0.0448839	0.579097	0.999996
ENSMUSG00000021240	Abcd4	ATP-binding cassette, sub-family D (ALD), member 4	-0.0811914	0.383497	0.999996	0.0268548	0.784379	0.999999	0.021706	0.899429	0.999994	0.129752	0.185051	0.999996
ENSMUSG00000058355	Abce1	ATP-binding cassette, sub-family E (OABP), member 1	0.055855	0.479386	0.999996	-0.186578	0.0149068	0.999999	0.154408	0.19366	0.999994	-0.0880249	0.291768	0.999996
ENSMUSG00000038762	Abcf1	ATP-binding cassette, sub-family F (GCN20), member 1	0.00984613	0.88743	0.999996	0.0132014	0.845708	0.999999	0.0489455	0.625058	0.999994	0.0523007	0.441048	0.999996
ENSMUSG00000028953	Abcf2	ATP-binding cassette, sub-family F (GCN20), member 2	0.207652	0.00121695	0.999996	0.405926	3.53433e-07	0.004431	0.0817353	0.367028	0.999994	0.280009	0.00019263	0.75858
ENSMUSG00000003234	Abcf3	ATP-binding cassette, sub-family F (GCN20), member 3	-0.0148661	0.861347	0.999996	0.1284	0.0827083	0.999999	0.103056	0.382253	0.999994	0.246322	0.00443429	0.999996
ENSMUSG00000024030	Abcg1	ATP binding cassette subfamily G member 1	-0.445781	0.168783	0.477544	-0.915644	0.00652204	0.0278833	0.0814026	0.888549	0.999994	-0.38846	0.302995	0.910064
ENSMUSG00000029802	Abcg2	ATP binding cassette subfamily G member 2 (Junior blood group)	-0.613604	0.0333957	0.159367	-0.942031	0.00186435	0.00998875	0.100813	0.84008	0.999994	-0.227614	0.494871	0.999996
ENSMUSG00000025324	Atp10a	ATPase, class V, type 10A	-0.303421	0.0018938	0.414287	-0.357568	0.00034526	0.125914	-0.120062	0.387148	0.999994	-0.174208	0.0782984	0.999996
ENSMUSG00000046808	Atp10d	ATPase, class V, type 10D	-0.298412	0.166566	0.605818	0.616178	0.00497674	0.0370177	-0.424576	0.206575	0.999994	0.490014	0.0338498	0.310476
ENSMUSG00000006800	Sulf2	sulfatase 2	0.660744	3.59484e-05	0.00178191	1.78908	9.19125e-12	4.34008e-11	-0.0333879	0.896232	0.999994	1.09495	2.43454e-07	3.74331e-06
ENSMUSG00000037400	Atp11b	ATPase, class VI, type 11B	-0.0514252	0.491674	0.999996	-0.0954084	0.178666	0.999999	-0.0722805	0.530166	0.999994	-0.116264	0.135889	0.999996
ENSMUSG00000062949	Atp11c	ATPase, class VI, type 11C	-0.112423	0.405029	0.999996	0.211471	0.0999114	0.815235	-0.142986	0.492699	0.999994	0.180907	0.201002	0.999996
ENSMUSG00000031862	Atp13a1	ATPase type 13A1	-0.0713665	0.436603	0.999996	0.150792	0.0837757	0.999999	-0.0313248	0.850491	0.999994	0.190833	0.047587	0.999996
ENSMUSG00000036622	Atp13a2	ATPase type 13A2	-0.173461	0.309962	0.97549	0.206569	0.206897	0.80667	0.00912741	0.975967	0.999994	0.389157	0.0356236	0.465325
ENSMUSG00000022533	Atp13a3	ATPase type 13A3	-0.247444	0.0140234	0.752919	-0.276077	0.00580118	0.512558	-0.0912132	0.560212	0.999994	-0.119846	0.261784	0.999996
ENSMUSG00000033161	Atp1a1	ATPase, Na+/K+ transporting, alpha 1 polypeptide	-0.163404	0.0223248	0.999996	0.266884	0.000480812	0.557436	-0.167461	0.137688	0.999994	0.262828	0.00158548	0.953231
ENSMUSG00000107879	9330102E08Rik	RIKEN cDNA 9330102E08 gene	0.677518	0.00135851	0.0178087	1.76493	6.42355e-09	3.31961e-08	-0.324193	0.331407	0.999994	0.763216	0.000499433	0.0111574
ENSMUSG00000032412	Atp1b3	ATPase, Na+/K+ transporting, beta 3 polypeptide	0.0942702	0.14428	0.999996	0.197513	0.0031205	0.999999	-0.00998848	0.938789	0.999994	0.0932545	0.1779	0.999996
ENSMUSG00000029467	Atp2a2	ATPase, Ca++ transporting, cardiac muscle, slow twitch 2	-0.298418	0.000268553	0.388958	0.0296645	0.693558	0.999999	-0.190731	0.105775	0.999994	0.137352	0.0735538	0.999996
ENSMUSG00000017754	Pltp	phospholipid transfer protein	0.690017	0.00136022	0.0170423	1.63019	1.96862e-08	1.15599e-07	-0.114566	0.753591	0.999994	0.825606	0.000280769	0.00628988
ENSMUSG00000055172	C1ra	complement component 1, r subcomponent A	1.27553	0.000375944	0.00246877	2.21033	1.11683e-07	4.08204e-07	0.208782	0.723549	0.999994	1.14358	0.000530278	0.00662877
ENSMUSG00000032570	Atp2c1	ATPase, Ca++-sequestering	-0.170581	0.0315243	0.999996	-0.27551	0.000981894	0.496852	0.00699672	0.963363	0.999994	-0.0979317	0.252835	0.999996
ENSMUSG00000005973	Rcn1	reticulocalbin 1	0.616833	0.000269015	0.00892049	1.53567	8.46292e-10	5.87658e-09	-0.262853	0.27863	0.999994	0.655988	0.00019146	0.009383
ENSMUSG00000042066	Tmcc2	transmembrane and coiled-coil domains 2	0.849567	1.20405e-05	0.0002703	1.72409	1.62622e-10	8.6457e-10	0.0363643	0.905499	0.999994	0.910885	9.61338e-06	0.000220028
ENSMUSG00000006567	Atp7b	ATPase, Cu++ transporting, beta polypeptide	-0.376646	0.0268659	0.311226	-0.428263	0.0139663	0.151736	-0.321898	0.210674	0.999994	-0.373514	0.0476084	0.543272
ENSMUSG00000037685	Atp8a1	ATPase, aminophospholipid transporter (APLT), class I, type 8A, member 1	0.278957	0.0378315	0.592861	0.356574	0.00726304	0.227377	0.064008	0.787854	0.999994	0.141625	0.315306	0.999996
ENSMUSG00000039529	Atp8b1	ATPase, class I, type 8B, member 1	-0.427569	8.27733e-05	0.0363701	-0.269087	0.00414311	0.551063	-0.19076	0.171017	0.999994	-0.0322785	0.7722	0.999996
ENSMUSG00000060671	Atp8b2	ATPase, class I, type 8B, member 2	-0.341782	0.000207897	0.187573	-0.0850573	0.276633	0.999999	-0.126278	0.303379	0.999994	0.130447	0.128389	0.999996
ENSMUSG00000027546	Atp9a	ATPase, class II, type 9A	-0.0865808	0.263945	0.999996	0.0250125	0.763642	0.999999	-0.0651384	0.601412	0.999994	0.0464549	0.603251	0.999996
ENSMUSG00000024566	Atp9b	ATPase, class II, type 9B	-0.175777	0.0420455	0.999996	0.092384	0.2738	0.999999	-0.113202	0.394646	0.999994	0.154959	0.0930983	0.999996
ENSMUSG00000005949	Ctns	cystinosis, nephropathic	0.00195726	0.984897	0.999996	0.177187	0.0484196	0.999999	-0.0323108	0.850728	0.999994	0.142919	0.145049	0.999996
ENSMUSG00000066595	Flvcr1	feline leukemia virus subgroup C cellular receptor 1	-0.057314	0.670553	0.999996	0.131832	0.284947	0.999999	-0.0941868	0.651742	0.999994	0.0949595	0.499095	0.999996
ENSMUSG00000005299	Letm1	leucine zipper-EF-hand containing transmembrane protein 1	-0.0931802	0.133828	0.999996	0.12604	0.039058	0.999999	-0.00498344	0.966885	0.999994	0.214236	0.00287626	0.999996
ENSMUSG00000037363	Letm2	leucine zipper-EF-hand containing transmembrane protein 2	0.349468	0.0583635	0.414134	0.68144	0.000676684	0.00818818	-0.259074	0.381898	0.999994	0.072898	0.735323	0.999996
ENSMUSG00000037353	Letmd1	LETM1 domain containing 1	0.368209	0.000586536	0.155222	0.360618	0.000453766	0.127005	0.109634	0.467555	0.999994	0.102043	0.317066	0.999996
ENSMUSG00000046186	Cd109	CD109 antigen	0.734846	0.00308327	0.0263946	1.59689	2.89255e-07	1.58822e-06	-0.0888859	0.846127	0.999994	0.773162	0.00197276	0.0289406
ENSMUSG00000023861	Mpc1	mitochondrial pyruvate carrier 1	0.30809	0.0183901	0.466316	-0.0553206	0.681375	0.999999	0.123873	0.547023	0.999994	-0.239537	0.0793135	0.999996
ENSMUSG00000026568	Mpc2	mitochondrial pyruvate carrier 2	0.116996	0.350617	0.999996	-0.326122	0.00991233	0.31719	0.0131027	0.958137	0.999994	-0.430016	0.00301116	0.189244
ENSMUSG00000018761	Mpdu1	mannose-P-dolichol utilization defect 1	0.00589289	0.959546	0.999996	-0.2345	0.0194717	0.755243	0.152936	0.327824	0.999994	-0.0874574	0.437662	0.999996
ENSMUSG00000024012	Mtch1	mitochondrial carrier 1	0.0568963	0.47586	0.999996	-0.0790889	0.302041	0.999999	0.00641847	0.966229	0.999994	-0.129567	0.119556	0.999996
ENSMUSG00000027282	Mtch2	mitochondrial carrier 2	0.219422	0.00485542	0.975348	-0.112044	0.120569	0.999999	0.193538	0.112222	0.999994	-0.137927	0.0824576	0.999996
ENSMUSG00000047037	Nipa1	non imprinted in Prader-Willi/Angelman syndrome 1 homolog (human)	-0.114545	0.490833	0.999996	-0.208394	0.179768	0.801276	0.109197	0.680144	0.999994	0.0153484	0.941049	0.999996
ENSMUSG00000030452	Nipa2	non imprinted in Prader-Willi/Angelman syndrome 2 homolog (human)	-0.28143	0.00128732	0.532737	-0.416322	1.45686e-05	0.0171011	0.059267	0.651165	0.999994	-0.0756244	0.396566	0.999996
ENSMUSG00000024413	Npc1	NPC intracellular cholesterol transporter 1	-0.201744	0.0152686	0.999996	-0.113289	0.151956	0.999999	-0.0458384	0.742954	0.999994	0.042617	0.655414	0.999996
ENSMUSG00000021474	Sfxn1	sideroflexin 1	0.0966564	0.199581	0.999996	0.0195719	0.811613	0.999999	0.0666732	0.58437	0.999994	-0.0104113	0.913398	0.999996
ENSMUSG00000025036	Sfxn2	sideroflexin 2	0.25791	0.0180013	0.689915	0.46396	0.000106541	0.0180021	-0.0324882	0.874841	0.999994	0.173562	0.119507	0.999996
ENSMUSG00000025212	Sfxn3	sideroflexin 3	-0.0865475	0.326476	0.999996	0.0977042	0.249282	0.999999	0.0325135	0.84008	0.999994	0.216765	0.0223569	0.999996
ENSMUSG00000063698	Sfxn4	sideroflexin 4	0.472468	0.040094	0.232104	0.623183	0.00806869	0.0486104	-0.242952	0.523282	0.999994	-0.0922374	0.72875	0.999996
ENSMUSG00000033720	Sfxn5	sideroflexin 5	0.00422716	0.979282	0.999996	0.375581	0.00998866	0.20385	-0.195094	0.392596	0.999994	0.17626	0.256088	0.999996
ENSMUSG00000032806	Slc10a3	solute carrier family 10 (sodium/bile acid cotransporter family), member 3	0.0672877	0.722008	0.999996	0.227451	0.171987	0.729959	0.0883851	0.770498	0.999994	0.248548	0.175483	0.999996
ENSMUSG00000031684	Slc10a7	solute carrier family 10 (sodium/bile acid cotransporter family), member 7	0.0355668	0.732762	0.999996	0.0507105	0.606367	0.999999	0.0514444	0.756742	0.999994	0.0665881	0.539398	0.999996
ENSMUSG00000023030	Slc11a2	solute carrier family 11 (proton-coupled divalent metal ion transporters), member 2	-0.157179	0.0853815	0.999996	-0.065968	0.473819	0.999999	-0.0698839	0.64283	0.999994	0.0213269	0.851703	0.999996
ENSMUSG00000027202	Slc12a1	solute carrier family 12, member 1	-0.587527	0.566442	0.949739	-0.70935	0.39727	0.692137	0.835745	0.544189	0.999994	0.713921	0.50964	0.999996
ENSMUSG00000024597	Slc12a2	solute carrier family 12, member 2	-0.483349	0.000161218	0.0221473	-0.380038	0.00111023	0.118123	-0.15985	0.339352	0.999994	-0.0565384	0.661774	0.999996
ENSMUSG00000031766	Slc12a3	solute carrier family 12, member 3	-0.758866	0.390576	0.738576	-0.835083	0.285542	0.534254	0.657854	0.60707	0.999994	0.581637	0.556255	0.999996
ENSMUSG00000017765	Slc12a4	solute carrier family 12, member 4	-0.00754601	0.951775	0.999996	0.50225	4.86433e-05	0.00759107	-0.0574282	0.758322	0.999994	0.452367	0.000556586	0.085161
ENSMUSG00000027130	Slc12a6	solute carrier family 12, member 6	-0.0572797	0.556575	0.999996	0.359272	0.000387036	0.125578	-0.148846	0.306182	0.999994	0.267706	0.00932844	0.914584
ENSMUSG00000017756	Slc12a7	solute carrier family 12, member 7	-0.142287	0.174195	0.999996	0.24873	0.0165265	0.672974	-0.0967638	0.563612	0.999994	0.294254	0.0110272	0.752151
ENSMUSG00000035506	Slc12a8	solute carrier family 12 (potassium/chloride transporters), member 8	-0.494733	0.0109027	0.126658	-0.496572	0.00975233	0.0900962	-0.168364	0.567541	0.999994	-0.170202	0.431189	0.999996
ENSMUSG00000037344	Slc12a9	solute carrier family 12 (potassium/chloride transporters), member 9	0.119749	0.210285	0.999996	0.463436	3.10815e-05	0.0104561	-0.0564502	0.733106	0.999994	0.287237	0.00669912	0.780431
ENSMUSG00000029700	Slc13a1	solute carrier family 13 (sodium/sulfate symporters), member 1	-1.18196	0.224134	0.486406	-0.642528	0.433937	0.744632	0.485339	0.728865	0.999994	1.02477	0.334747	0.880105
ENSMUSG00000018459	Slc13a3	solute carrier family 13 (sodium-dependent dicarboxylate transporter), member 3	-0.769686	0.558273	0.935635	-0.89325	0.432157	0.732172	0.598741	0.757544	0.999994	0.475177	0.755447	0.999996
ENSMUSG00000022899	Slc15a2	solute carrier family 15 (H+/peptide transporter), member 2	-0.450822	0.00227497	0.0936353	-0.575519	0.000261054	0.00879669	-0.318709	0.142643	0.999994	-0.443405	0.00632779	0.216558
ENSMUSG00000029416	Slc15a4	solute carrier family 15, member 4	0.0565086	0.486732	0.999996	0.0748209	0.336634	0.999999	-0.00736249	0.961993	0.999994	0.0109497	0.912675	0.999996
ENSMUSG00000032902	Slc16a1	solute carrier family 16 (monocarboxylic acid transporters), member 1	0.119785	0.174282	0.999996	0.231895	0.00927313	0.793382	-0.0459762	0.764405	0.999994	0.0661335	0.505949	0.999996
ENSMUSG00000019838	Slc16a10	solute carrier family 16 (monocarboxylic acid transporters), member 10	-0.26958	0.0199729	0.626303	0.198695	0.070825	0.907012	-0.15847	0.363351	0.999994	0.309806	0.0132785	0.675097
ENSMUSG00000028972	Car6	carbonic anhydrase 6	2.67377	3.78e-08	1.15387e-07	3.52478	1.69382e-10	4.06116e-10	-0.117711	0.893708	0.999994	0.73329	0.00538658	0.0631407
ENSMUSG00000044367	Slc16a13	solute carrier family 16 (monocarboxylic acid transporters), member 13	-0.205204	0.177469	0.882508	0.177374	0.226184	0.916891	-0.0684167	0.79952	0.999994	0.314161	0.0536306	0.732634
ENSMUSG00000060550	H2-Q7	histocompatibility 2, Q region locus 7	0.462226	0.000538469	0.0485532	1.30553	6.49452e-10	6.43245e-09	-0.312463	0.116273	0.999994	0.530841	0.000300193	0.0293124
ENSMUSG00000041920	Slc16a6	solute carrier family 16 (monocarboxylic acid transporters), member 6	0.0195514	0.912999	0.999996	-0.229416	0.129655	0.726585	0.1352	0.589	0.999994	-0.113768	0.519717	0.999996
ENSMUSG00000021335	Slc17a1	solute carrier family 17 (sodium phosphate), member 1	-0.898507	0.0356558	0.135148	-0.198291	0.614206	0.986114	0.29879	0.638703	0.999994	0.999006	0.0286831	0.157761
ENSMUSG00000036083	Slc17a3	solute carrier family 17 (sodium phosphate), member 3	-0.938066	0.425857	0.776074	-1.01997	0.306046	0.554707	0.781836	0.635372	0.999994	0.69993	0.599678	0.999996
ENSMUSG00000049624	Slc17a5	solute carrier family 17 (anion/sugar transporter), member 5	0.074626	0.55601	0.999996	0.197464	0.0972917	0.891819	-0.123304	0.527869	0.999994	-0.000466317	0.997849	0.999996
ENSMUSG00000036330	Slc18a1	solute carrier family 18 (vesicular monoamine), member 1	0.164083	0.708493	0.999996	-1.14872	0.00624874	0.0215469	0.55979	0.357069	0.999994	-0.753018	0.101126	0.427039
ENSMUSG00000037455	Slc18b1	solute carrier family 18, subfamily B, member 1	0.239205	0.111695	0.757925	0.671345	6.89049e-05	0.00189331	0.00212029	0.994528	0.999994	0.434261	0.00756285	0.244263
ENSMUSG00000037321	Tap1	transporter 1, ATP-binding cassette, sub-family B (MDR/TAP)	0.471028	1.66087e-05	0.00888372	1.30015	5.20511e-12	4.91584e-11	-0.222788	0.121592	0.999994	0.606331	5.16101e-06	0.00079518
ENSMUSG00000040918	Slc19a2	solute carrier family 19 (thiamine transporter), member 2	0.0369389	0.705157	0.999996	0.268525	0.00349786	0.553568	0.0348097	0.835341	0.999994	0.266395	0.00775085	0.92251
ENSMUSG00000024935	Slc1a1	solute carrier family 1 (neuronal/epithelial high affinity glutamate transporter, system Xag), member 1	-1.12557	0.0595009	0.179573	-1.27177	0.0291522	0.0741539	0.0651476	0.952829	0.999994	-0.0810569	0.922128	0.999996
ENSMUSG00000065947	mt-Nd4l	mitochondrially encoded NADH dehydrogenase 4L	0.768225	4.10819e-06	0.000142327	1.56254	1.62622e-10	9.00314e-10	-0.212889	0.261719	0.999994	0.581423	0.000219695	0.0152346
ENSMUSG00000028268	Gbp3	guanylate binding protein 3	0.47618	5.56638e-05	0.0148405	1.234	6.4541e-11	7.74286e-10	-0.288811	0.0893363	0.999994	0.469014	0.000140697	0.0388486
ENSMUSG00000027397	Slc20a1	solute carrier family 20, member 1	0.0820264	0.191605	0.999996	0.346934	6.93217e-06	0.0671258	0.0493162	0.6346	0.999994	0.314224	0.000129374	0.421498
ENSMUSG00000037656	Slc20a2	solute carrier family 20, member 2	-0.0936492	0.289997	0.999996	0.0579425	0.515422	0.999999	-0.090144	0.51967	0.999994	0.0614478	0.53911	0.999996
ENSMUSG00000023829	Slc22a1	solute carrier family 22 (organic cation transporter), member 1	-0.80197	0.519001	0.893049	-1.16736	0.239825	0.45013	0.984302	0.539377	0.999994	0.618912	0.660762	0.999996
ENSMUSG00000061742	Slc22a12	solute carrier family 22 (organic anion/cation transporter), member 12	-0.632694	0.529141	0.908862	-0.969101	0.26181	0.491512	0.902599	0.520834	0.999994	0.566192	0.611373	0.999996
ENSMUSG00000033147	Slc22a15	solute carrier family 22 (organic anion/cation transporter), member 15	-0.20063	0.116667	0.928018	-0.490609	0.000496185	0.0259489	0.00459627	0.985067	0.999994	-0.285383	0.0444504	0.845816
ENSMUSG00000022199	Slc22a17	solute carrier family 22 (organic cation transporter), member 17	-0.0351036	0.905663	0.999996	0.0596458	0.830598	0.999999	0.0697774	0.884553	0.999994	0.164527	0.573498	0.999996
ENSMUSG00000000154	Slc22a18	solute carrier family 22 (organic cation transporter), member 18	-0.216825	0.492353	0.934396	-0.312717	0.269889	0.616133	0.456283	0.315195	0.999994	0.360391	0.270175	0.883048
ENSMUSG00000040966	Slc22a2	solute carrier family 22 (organic cation transporter), member 2	-0.914043	0.413102	0.760447	-0.7322	0.404773	0.700685	0.832042	0.565592	0.999994	1.01389	0.389194	0.961193
ENSMUSG00000038267	Slc22a23	solute carrier family 22, member 23	-0.251572	0.0376821	0.719536	0.151703	0.19663	0.999999	-0.246275	0.184333	0.999994	0.157001	0.226413	0.999996
ENSMUSG00000020334	Slc22a4	solute carrier family 22 (organic cation transporter), member 4	-0.335227	0.0437611	0.425533	-0.334518	0.0381623	0.354234	0.0150869	0.961952	0.999994	0.0157952	0.941697	0.999996
ENSMUSG00000018900	Slc22a5	solute carrier family 22 (organic cation transporter), member 5	0.0111003	0.918249	0.999996	0.254069	0.0070032	0.648477	-0.032027	0.856556	0.999994	0.210941	0.0356756	0.999996
ENSMUSG00000024650	Slc22a6	solute carrier family 22 (organic anion transporter), member 6	-0.64053	0.548691	0.928018	-0.695244	0.418741	0.723697	1.1914	0.400122	0.999994	1.13668	0.291302	0.800421
ENSMUSG00000063796	Slc22a8	solute carrier family 22 (organic anion transporter), member 8	-0.423396	0.674368	0.999996	-0.3656	0.662779	0.999999	0.78794	0.560421	0.999994	0.845736	0.394501	0.977034
ENSMUSG00000027340	Slc23a2	solute carrier family 23 (nucleobase transporters), member 2	0.0613647	0.467221	0.999996	0.353817	0.000123739	0.108958	-0.0888802	0.493506	0.999994	0.203573	0.0219787	0.999996
ENSMUSG00000026205	Slc23a3	solute carrier family 23 (nucleobase transporters), member 3	0.535402	0.0954844	0.32398	0.683126	0.0358461	0.121693	-0.25021	0.660946	0.999994	-0.102486	0.785875	0.999996
ENSMUSG00000003528	Slc25a1	solute carrier family 25 (mitochondrial carrier, citrate transporter), member 1	-0.0369913	0.62728	0.999996	0.0134853	0.866361	0.999999	0.0176696	0.895009	0.999994	0.0681462	0.389878	0.999996
ENSMUSG00000025792	Slc25a10	solute carrier family 25 (mitochondrial carrier, dicarboxylate transporter), member 10	-0.393847	0.000451323	0.10378	-0.686853	4.07548e-07	3.64941e-05	0.0610975	0.710839	0.999994	-0.231908	0.0357295	0.999996
ENSMUSG00000014606	Slc25a11	solute carrier family 25 (mitochondrial carrier oxoglutarate carrier), member 11	-0.0364508	0.680135	0.999996	-0.0961392	0.233473	0.999999	0.0185745	0.905233	0.999994	-0.0411139	0.671757	0.999996
ENSMUSG00000027010	Slc25a12	solute carrier family 25 (mitochondrial carrier, Aralar), member 12	0.197445	0.0179512	0.999996	0.134751	0.0888423	0.999999	0.105367	0.405385	0.999994	0.0426731	0.652865	0.999996
ENSMUSG00000015112	Slc25a13	solute carrier family 25 (mitochondrial carrier, adenine nucleotide translocator), member 13	-0.385018	2.70394e-05	0.0520743	-0.407406	7.5968e-06	0.0159706	-0.0438676	0.725817	0.999994	-0.066256	0.42528	0.999996
ENSMUSG00000031105	Slc25a14	solute carrier family 25 (mitochondrial carrier, brain), member 14	0.434032	0.00955579	0.168704	-0.117882	0.475263	0.999999	0.0919734	0.7476	0.999994	-0.459941	0.0102212	0.229535
ENSMUSG00000031482	Slc25a15	solute carrier family 25 (mitochondrial carrier ornithine transporter), member 15	0.0454995	0.611277	0.999996	0.31636	0.000493777	0.256973	-0.0220303	0.889137	0.999994	0.24883	0.00784184	0.999996
ENSMUSG00000071253	Slc25a16	solute carrier family 25 (mitochondrial carrier, Graves disease autoantigen), member 16	0.128714	0.102967	0.999996	-0.0237945	0.780196	0.999999	0.0946602	0.44023	0.999994	-0.057848	0.515626	0.999996
ENSMUSG00000022404	Slc25a17	solute carrier family 25 (mitochondrial carrier, peroxisomal membrane protein), member 17	0.167167	0.0358079	0.999996	0.146207	0.0578106	0.999999	0.0705099	0.578578	0.999994	0.0495497	0.583838	0.999996
ENSMUSG00000020744	Slc25a19	solute carrier family 25 (mitochondrial thiamine pyrophosphate carrier), member 19	0.0462789	0.650216	0.999996	0.077101	0.413228	0.999999	0.108832	0.463811	0.999994	0.139654	0.169908	0.999996
ENSMUSG00000032602	Slc25a20	solute carrier family 25 (mitochondrial carnitine/acylcarnitine translocase), member 20	0.17351	0.0842623	0.999996	-0.0823698	0.415653	0.999999	0.0297368	0.87609	0.999994	-0.226143	0.037669	0.999996
ENSMUSG00000019082	Slc25a22	solute carrier family 25 (mitochondrial carrier, glutamate), member 22	0.143158	0.126044	0.999996	0.542926	3.6138e-06	0.000992442	-0.1154	0.431991	0.999994	0.284368	0.00614728	0.800421
ENSMUSG00000046329	Slc25a23	solute carrier family 25 (mitochondrial carrier; phosphate carrier), member 23	-0.45278	1.15414e-05	0.0100111	-0.23933	0.00390239	0.760447	-0.128529	0.298779	0.999994	0.084922	0.342872	0.999996
ENSMUSG00000040322	Slc25a24	solute carrier family 25 (mitochondrial carrier, phosphate carrier), member 24	-0.27765	0.0006037	0.547729	-0.482356	6.28204e-07	0.000942187	0.0392392	0.754853	0.999994	-0.165467	0.0356688	0.999996
ENSMUSG00000026819	Slc25a25	solute carrier family 25 (mitochondrial carrier, phosphate carrier), member 25	-0.0910098	0.289997	0.999996	0.0132326	0.88926	0.999999	-0.0155383	0.926687	0.999994	0.0887041	0.342482	0.999996
ENSMUSG00000045100	Slc25a26	solute carrier family 25 (mitochondrial carrier, phosphate carrier), member 26	0.276245	0.0320921	0.60129	0.240359	0.0530719	0.696361	0.0309169	0.899004	0.999994	-0.00496855	0.97572	0.999996
ENSMUSG00000023912	Slc25a27	solute carrier family 25, member 27	0.395602	0.018509	0.254189	0.801453	3.51248e-05	0.000568303	-0.249257	0.348543	0.999994	0.156594	0.368587	0.999996
ENSMUSG00000040414	Slc25a28	solute carrier family 25, member 28	0.286117	0.00586746	0.531637	0.625349	1.09917e-06	0.000151179	0.0368658	0.842235	0.999994	0.376098	0.00117125	0.249912
ENSMUSG00000021265	Slc25a29	solute carrier family 25 (mitochondrial carrier, palmitoylcarnitine transporter), member 29	-0.303171	0.120816	0.568549	-0.202972	0.282907	0.809785	0.100846	0.760872	0.999994	0.201045	0.351437	0.999996
ENSMUSG00000061904	Slc25a3	solute carrier family 25 (mitochondrial carrier, phosphate carrier), member 3	0.239167	0.0129623	0.804811	0.0417411	0.671184	0.999999	-0.0581431	0.712997	0.999994	-0.255569	0.0135283	0.999996
ENSMUSG00000022003	Slc25a30	solute carrier family 25, member 30	0.179091	0.0177254	0.999996	0.158171	0.0295898	0.999999	0.0660296	0.578716	0.999994	0.0451094	0.5953	0.999996
ENSMUSG00000022299	Slc25a32	solute carrier family 25, member 32	0.129632	0.303287	0.999996	0.164979	0.17857	0.999999	-0.081897	0.700727	0.999994	-0.0465502	0.755293	0.999996
ENSMUSG00000016496	Cd274	CD274 antigen	0.575844	1.24963e-05	0.00189627	1.32857	4.08593e-11	3.85386e-10	-0.177626	0.291088	0.999994	0.575104	2.88872e-05	0.00478443
ENSMUSG00000018740	Slc25a35	solute carrier family 25, member 35	-0.205633	0.356877	0.880665	-0.435694	0.0505659	0.231291	-0.148871	0.685	0.999994	-0.378932	0.121315	0.656429
ENSMUSG00000032449	Slc25a36	solute carrier family 25, member 36	-0.0447025	0.619705	0.999996	-0.0816574	0.333818	0.999999	-0.00799162	0.961736	0.999994	-0.0449465	0.653623	0.999996
ENSMUSG00000034248	Slc25a37	solute carrier family 25, member 37	-0.000228724	0.997103	0.999996	0.40182	8.2762e-07	0.00748544	-0.18098	0.0858969	0.999994	0.221069	0.00207672	0.999996
ENSMUSG00000032519	Slc25a38	solute carrier family 25, member 38	0.183829	0.159749	0.985156	0.233567	0.0623786	0.726585	0.166426	0.410934	0.999994	0.216164	0.115137	0.999996
ENSMUSG00000018677	Slc25a39	solute carrier family 25, member 39	0.314281	0.000608719	0.329189	0.210846	0.0106285	0.933985	-0.0258165	0.868531	0.999994	-0.129252	0.141376	0.999996
ENSMUSG00000031633	Slc25a4	solute carrier family 25 (mitochondrial carrier, adenine nucleotide translocator), member 4	0.205477	0.0234213	0.999245	0.0743946	0.404198	0.999999	0.0984486	0.482241	0.999994	-0.032634	0.761241	0.999996
ENSMUSG00000054099	Slc25a40	solute carrier family 25, member 40	0.121015	0.255201	0.999996	-0.045634	0.683195	0.999999	0.0242165	0.904546	0.999994	-0.142432	0.211555	0.999996
ENSMUSG00000002346	Slc25a42	solute carrier family 25, member 42	0.0562163	0.766308	0.999996	0.419262	0.0147221	0.163999	-0.136419	0.638274	0.999994	0.226627	0.216219	0.999996
ENSMUSG00000037636	Slc25a43	solute carrier family 25, member 43	-0.209562	0.426216	0.901417	-0.161052	0.545257	0.963089	-0.173344	0.686651	0.999994	-0.124834	0.686652	0.999996
ENSMUSG00000050144	Slc25a44	solute carrier family 25, member 44	-0.261168	0.0072268	0.67242	-0.00104812	0.99273	0.999999	-0.0803994	0.591004	0.999994	0.179721	0.0733863	0.999996
ENSMUSG00000024818	Slc25a45	solute carrier family 25, member 45	0.00119773	0.99576	0.999996	0.0526754	0.798096	0.999999	-0.141132	0.653083	0.999994	-0.0896539	0.685409	0.999996
ENSMUSG00000024259	Slc25a46	solute carrier family 25, member 46	-0.0360581	0.618698	0.999996	0.0204772	0.781953	0.999999	0.0598707	0.588178	0.999994	0.116406	0.113028	0.999996
ENSMUSG00000048856	Slc25a47	solute carrier family 25, member 47	0.37131	0.195215	0.550637	0.336985	0.246347	0.569874	-0.200061	0.693232	0.999994	-0.234385	0.456586	0.999996
ENSMUSG00000052131	Akr1b7	aldo-keto reductase family 1, member B7	1.94126	0.000204378	0.000927502	2.66943	1.46402e-06	4.43347e-06	-0.0244758	0.994528	0.999994	0.703689	0.0587004	0.308929
ENSMUSG00000016319	Slc25a5	solute carrier family 25 (mitochondrial carrier, adenine nucleotide translocator), member 5	0.448948	1.0419e-05	0.0100655	0.343339	0.000124775	0.131699	0.0710131	0.578087	0.999994	-0.0345964	0.715394	0.999996
ENSMUSG00000045973	Slc25a51	solute carrier family 25, member 51	-0.151843	0.0559821	0.999996	0.00238979	0.97922	0.999999	-0.0604323	0.642869	0.999994	0.0938008	0.275696	0.999996
ENSMUSG00000044348	Slc25a53	solute carrier family 25, member 53	0.165848	0.398903	0.985156	-0.0532042	0.800761	0.999999	0.0486938	0.892691	0.999994	-0.170358	0.42352	0.999996
ENSMUSG00000040441	Slc26a10	solute carrier family 26, member 10	0.0122091	0.9603	0.999996	-0.317871	0.122899	0.471234	0.217912	0.515727	0.999994	-0.112169	0.654915	0.999996
ENSMUSG00000039908	Slc26a11	solute carrier family 26, member 11	-0.0182539	0.897374	0.999996	-0.00644844	0.963099	0.999999	0.0326756	0.887427	0.999994	0.0444811	0.763683	0.999996
ENSMUSG00000034320	Slc26a2	solute carrier family 26 (sulfate transporter), member 2	-0.184485	0.128898	0.999996	-0.161509	0.177324	0.999999	-0.101475	0.605967	0.999994	-0.0784987	0.580072	0.999996
ENSMUSG00000020651	Slc26a4	solute carrier family 26, member 4	-1.00713	0.000765722	0.00633766	-0.461233	0.0837757	0.273174	-0.47151	0.234277	0.999994	0.0743842	0.833602	0.999996
ENSMUSG00000023259	Slc26a6	solute carrier family 26, member 6	0.262884	0.274465	0.738637	1.11589	6.14432e-05	0.000461093	-0.436696	0.25927	0.999994	0.416306	0.0916211	0.553035
ENSMUSG00000031808	Slc27a1	solute carrier family 27 (fatty acid transporter), member 1	-0.225414	0.10844	0.815218	0.00266644	0.987202	0.999999	-0.035829	0.889568	0.999994	0.192252	0.204774	0.999996
ENSMUSG00000027359	Slc27a2	solute carrier family 27 (fatty acid transporter), member 2	-0.802445	0.464574	0.827793	-0.575841	0.547001	0.878536	0.727039	0.647997	0.999994	0.953644	0.412195	0.999996
ENSMUSG00000027932	Slc27a3	solute carrier family 27 (fatty acid transporter), member 3	0.150214	0.491696	0.999996	0.391651	0.0589288	0.289942	-0.140384	0.699398	0.999994	0.101053	0.679932	0.999996
ENSMUSG00000059316	Slc27a4	solute carrier family 27 (fatty acid transporter), member 4	-0.462622	0.000197062	0.0320114	-0.21306	0.0415065	0.858252	-0.0787229	0.652505	0.999994	0.170839	0.141187	0.999996
ENSMUSG00000023942	Slc29a1	solute carrier family 29 (nucleoside transporters), member 1	0.365603	0.000823618	0.172171	0.710776	1.73764e-07	1.41531e-05	-0.00223137	0.990237	0.999994	0.342942	0.00214588	0.413476
ENSMUSG00000024891	Slc29a2	solute carrier family 29 (nucleoside transporters), member 2	0.0901317	0.608025	0.999996	0.399059	0.0144676	0.186261	0.00474712	0.988048	0.999994	0.313675	0.0724279	0.752151
ENSMUSG00000020100	Slc29a3	solute carrier family 29 (nucleoside transporters), member 3	-0.0019293	0.987445	0.999996	0.315185	0.00455599	0.327041	-0.135223	0.424496	0.999994	0.181891	0.115137	0.999996
ENSMUSG00000050822	Slc29a4	solute carrier family 29 (nucleoside transporters), member 4	-0.265592	0.154228	0.676169	-0.165234	0.370859	0.927483	-0.0372294	0.916062	0.999994	0.0631285	0.782636	0.999996
ENSMUSG00000028645	Slc2a1	solute carrier family 2 (facilitated glucose transporter), member 1	-0.14899	0.292915	0.999996	-0.125187	0.371156	0.999999	0.0554909	0.830287	0.999994	0.0792935	0.630548	0.999996
ENSMUSG00000027690	Slc2a2	solute carrier family 2 (facilitated glucose transporter), member 2	-0.708086	0.190937	0.462085	-1.2853	0.0120431	0.0345402	0.574717	0.441015	0.999994	-0.00250151	0.99757	0.999996
ENSMUSG00000026791	Slc2a8	solute carrier family 2, (facilitated glucose transporter), member 8	0.270798	0.0382253	0.626081	0.624683	2.69305e-05	0.00145842	0.0775556	0.729782	0.999994	0.43144	0.00278368	0.185346
ENSMUSG00000005107	Slc2a9	solute carrier family 2 (facilitated glucose transporter), member 9	0.0723798	0.833341	0.999996	0.757171	0.0102564	0.0449045	0.0778233	0.892347	0.999994	0.762614	0.0180338	0.134878
ENSMUSG00000037434	Slc30a1	solute carrier family 30 (zinc transporter), member 1	0.0756397	0.487226	0.999996	0.271828	0.0104408	0.541783	-0.128771	0.434009	0.999994	0.0674177	0.57429	0.999996
ENSMUSG00000005802	Slc30a4	solute carrier family 30 (zinc transporter), member 4	-0.165651	0.0861496	0.999996	0.0161182	0.881205	0.999999	-0.0893098	0.56298	0.999994	0.0924595	0.386679	0.999996
ENSMUSG00000021629	Slc30a5	solute carrier family 30 (zinc transporter), member 5	0.0282423	0.74041	0.999996	0.156847	0.0400162	0.999999	0.0468157	0.726949	0.999994	0.17542	0.0370588	0.999996
ENSMUSG00000024069	Slc30a6	solute carrier family 30 (zinc transporter), member 6	0.167797	0.127378	0.999996	0.148459	0.162581	0.999999	0.109326	0.535088	0.999994	0.0899874	0.457576	0.999996
ENSMUSG00000054414	Slc30a7	solute carrier family 30 (zinc transporter), member 7	-0.35327	0.000253959	0.161683	-0.226367	0.00790002	0.837818	-0.167361	0.195562	0.999994	-0.0404585	0.685565	0.999996
ENSMUSG00000029221	Slc30a9	solute carrier family 30 (zinc transporter), member 9	0.0914203	0.0955745	0.999996	0.07324	0.172866	0.999999	0.0184286	0.859225	0.999994	0.000248337	0.997424	0.999996
ENSMUSG00000066150	Slc31a1	solute carrier family 31, member 1	-0.120071	0.0987706	0.999996	-0.245064	0.00134238	0.735791	0.180618	0.123503	0.999994	0.055625	0.498093	0.999996
ENSMUSG00000066152	Slc31a2	solute carrier family 31, member 2	-0.282273	0.00805491	0.555031	-0.39094	0.000478819	0.0832497	-0.0548715	0.755266	0.999994	-0.163538	0.144907	0.999996
ENSMUSG00000027822	Slc33a1	solute carrier family 33 (acetyl-CoA transporter), member 1	-0.480973	2.63401e-05	0.00962257	-0.186881	0.0385093	0.999999	-0.14113	0.317803	0.999994	0.152962	0.125064	0.999996
ENSMUSG00000021490	Slc34a1	solute carrier family 34 (sodium phosphate), member 1	-0.935287	0.382624	0.722825	-0.87498	0.356941	0.634083	0.650147	0.682178	0.999994	0.710454	0.553761	0.999996
ENSMUSG00000028293	Slc35a1	solute carrier family 35 (CMP-sialic acid transporter), member 1	0.248936	0.0209232	0.738006	-0.00570854	0.96216	0.999999	0.0991543	0.560263	0.999994	-0.155491	0.168135	0.999996
ENSMUSG00000031156	Slc35a2	solute carrier family 35 (UDP-galactose transporter), member A2	-0.0731736	0.567191	0.999996	0.0173664	0.897389	0.999999	0.102707	0.600028	0.999994	0.193247	0.137729	0.999996
ENSMUSG00000027957	Slc35a3	solute carrier family 35 (UDP-N-acetylglucosamine (UDP-GlcNAc) transporter), member 3	-0.149872	0.0801195	0.999996	-0.205405	0.0165354	0.949272	-0.0318738	0.840696	0.999994	-0.0874067	0.355075	0.999996
ENSMUSG00000033272	Slc35a4	solute carrier family 35, member A4	-0.296359	0.000595619	0.422437	-0.19402	0.0118826	0.999999	-0.0457901	0.726514	0.999994	0.0565489	0.519075	0.999996
ENSMUSG00000022664	Slc35a5	solute carrier family 35, member A5	-0.136209	0.206397	0.999996	-0.101107	0.342023	0.999999	0.00744049	0.970418	0.999994	0.0425424	0.7437	0.999996
ENSMUSG00000020873	Slc35b1	solute carrier family 35, member B1	0.174771	0.0119086	0.999996	0.0879577	0.179912	0.999999	0.0942827	0.365549	0.999994	0.00746926	0.930171	0.999996
ENSMUSG00000037089	Slc35b2	solute carrier family 35, member B2	-0.119314	0.104039	0.999996	-0.238778	0.00193908	0.780385	0.0151655	0.914012	0.999994	-0.104298	0.189859	0.999996
ENSMUSG00000021432	Slc35b3	solute carrier family 35, member B3	0.113941	0.320285	0.999996	-0.0389109	0.747703	0.999999	0.119497	0.506801	0.999994	-0.0333556	0.81074	0.999996
ENSMUSG00000013418	B4galnt2	beta-1,4-N-acetyl-galactosaminyl transferase 2	2.42831	3.94706e-10	1.31477e-09	3.15599	2.49263e-12	6.33321e-12	-0.119041	0.787854	0.999994	0.608636	0.00150869	0.0441726
ENSMUSG00000049922	Slc35c1	solute carrier family 35, member C1	-0.283927	0.0129821	0.555326	0.0546545	0.633721	0.999999	-0.159898	0.348815	0.999994	0.178684	0.134891	0.999996
ENSMUSG00000017664	Slc35c2	solute carrier family 35, member C2	0.380453	0.000165903	0.0952467	0.54401	1.12084e-06	0.000455564	0.0772369	0.585166	0.999994	0.240794	0.0102552	0.999996
ENSMUSG00000028521	Slc35d1	solute carrier family 35 (UDP-glucuronic acid/UDP-N-acetylgalactosamine dual transporter), member D1	0.0516446	0.711102	0.999996	0.0482521	0.724482	0.999999	0.0132349	0.959403	0.999994	0.0098424	0.952413	0.999996
ENSMUSG00000033114	Slc35d2	solute carrier family 35, member D2	0.243657	0.0475446	0.752919	0.0565149	0.658899	0.999999	0.0433236	0.850375	0.999994	-0.143819	0.274563	0.999996
ENSMUSG00000019731	Slc35e1	solute carrier family 35, member E1	-0.266428	0.00256358	0.634652	-0.00467854	0.96037	0.999999	-0.0949554	0.45674	0.999994	0.166794	0.0605611	0.999996
ENSMUSG00000060181	Slc35e3	solute carrier family 35, member E3	-0.192443	0.0996949	0.981497	0.0225951	0.862329	0.999999	-0.0866864	0.653682	0.999994	0.128352	0.315402	0.999996
ENSMUSG00000048807	Slc35e4	solute carrier family 35, member E4	-0.257013	0.0100904	0.699196	0.106661	0.25682	0.999999	-0.0788879	0.612599	0.999994	0.284787	0.00830146	0.803718
ENSMUSG00000042195	Slc35f2	solute carrier family 35, member F2	0.41398	0.00312156	0.143065	0.70277	8.70707e-06	0.00034018	0.0494123	0.842535	0.999994	0.338202	0.0152457	0.558253
ENSMUSG00000026342	Slc35f5	solute carrier family 35, member F5	-0.296208	0.000424469	0.414831	-0.289966	0.000338997	0.384805	0.0513264	0.675051	0.999994	0.0575693	0.493258	0.999996
ENSMUSG00000029175	Slc35f6	solute carrier family 35, member F6	-0.0266016	0.758416	0.999996	0.305881	0.000385406	0.299456	-0.0556988	0.674292	0.999994	0.276784	0.002492	0.842782
ENSMUSG00000044026	Slc35g1	solute carrier family 35, member G1	-0.494073	1.13353e-05	0.00514618	-0.305514	0.000968979	0.323652	-0.0104789	0.952829	0.999994	0.17808	0.0630051	0.999996
ENSMUSG00000020261	Slc36a1	solute carrier family 36 (proton/amino acid symporter), member 1	-0.251848	0.0131835	0.725921	-0.19757	0.0418607	0.945703	-0.0737861	0.648321	0.999994	-0.0195074	0.875882	0.999996
ENSMUSG00000043885	Slc36a4	solute carrier family 36 (proton/amino acid symporter), member 4	-0.0482652	0.782042	0.999996	-0.25019	0.109099	0.648477	0.0229017	0.943618	0.999994	-0.179023	0.306869	0.999996
ENSMUSG00000024036	Slc37a1	solute carrier family 37 (glycerol-3-phosphate transporter), member 1	-0.425212	0.0234595	0.230772	-0.215507	0.222927	0.772707	0.0143244	0.966885	0.999994	0.224029	0.264177	0.999996
ENSMUSG00000020303	Stc2	stanniocalcin 2	0.626185	4.87894e-05	0.00273615	1.34969	8.07368e-10	7.25088e-09	-0.0735723	0.741206	0.999994	0.649932	7.90177e-05	0.00493521
ENSMUSG00000029924	Slc37a3	solute carrier family 37 (glycerol-3-phosphate transporter), member 3	-0.111661	0.129012	0.999996	-0.0889042	0.218013	0.999999	-0.00639505	0.964284	0.999994	0.016362	0.859098	0.999996
ENSMUSG00000032114	Slc37a4	solute carrier family 37 (glucose-6-phosphate transporter), member 4	-0.0966127	0.339917	0.999996	-0.0736348	0.463548	0.999999	-0.0358836	0.846436	0.999994	-0.0129057	0.920349	0.999996
ENSMUSG00000023169	Slc38a1	solute carrier family 38, member 1	0.187992	0.0344974	0.999996	0.535979	2.07004e-06	0.000773783	-0.152847	0.262655	0.999994	0.19514	0.0390382	0.999996
ENSMUSG00000061306	Slc38a10	solute carrier family 38, member 10	-0.348329	0.000377497	0.18773	0.174987	0.0383832	0.999999	-0.155894	0.238259	0.999994	0.367423	0.00054412	0.232604
ENSMUSG00000022462	Slc38a2	solute carrier family 38, member 2	0.0353177	0.67513	0.999996	0.0962767	0.211434	0.999999	-0.0910508	0.456699	0.999994	-0.0300918	0.750774	0.999996
ENSMUSG00000010064	Slc38a3	solute carrier family 38, member 3	0.408347	0.271552	0.629606	0.344292	0.306107	0.637266	0.47795	0.400843	0.999994	0.413895	0.266313	0.853085
ENSMUSG00000044712	Slc38a6	solute carrier family 38, member 6	-0.0626668	0.361252	0.999996	-0.0848575	0.201635	0.999999	-0.0566931	0.605512	0.999994	-0.0788838	0.285764	0.999996
ENSMUSG00000039742	Fam71f1	family with sequence similarity 71, member F1	0.976241	0.0032572	0.0207586	1.68891	6.62347e-06	3.02684e-05	-0.106206	0.869903	0.999994	0.606466	0.0418312	0.266112
ENSMUSG00000047789	Slc38a9	solute carrier family 38, member 9	0.221418	0.0421722	0.875156	0.44713	0.000196957	0.0289862	-0.101319	0.565619	0.999994	0.124393	0.279995	0.999996
ENSMUSG00000052310	Slc39a1	solute carrier family 39 (zinc transporter), member 1	-0.18504	0.0115786	0.999996	-0.207604	0.00441524	0.997173	-0.0426948	0.723968	0.999994	-0.065258	0.408267	0.999996
ENSMUSG00000025986	Slc39a10	solute carrier family 39 (zinc transporter), member 10	-0.353753	0.00261237	0.243634	-0.239159	0.0261902	0.7208	0.0256776	0.899728	0.999994	0.140271	0.239962	0.999996
ENSMUSG00000041654	Slc39a11	solute carrier family 39 (metal ion transporter), member 11	0.292824	0.00939608	0.505739	0.588562	6.86328e-06	0.000839168	0.132596	0.433514	0.999994	0.428334	0.000788512	0.126357
ENSMUSG00000002105	Slc39a13	solute carrier family 39 (metal ion transporter), member 13	-0.0280692	0.813739	0.999996	0.18423	0.0757306	0.982021	0.0257858	0.898015	0.999994	0.238085	0.0385101	0.999996
ENSMUSG00000022094	Slc39a14	solute carrier family 39 (zinc transporter), member 14	-0.313142	0.000336669	0.316894	-0.0880534	0.241243	0.999999	-0.112755	0.338809	0.999994	0.112333	0.17332	0.999996
ENSMUSG00000046822	Slc39a3	solute carrier family 39 (zinc transporter), member 3	0.239079	0.0402249	0.778976	0.530729	5.889e-05	0.0059768	-0.0384379	0.861837	0.999994	0.253212	0.0384228	0.999996
ENSMUSG00000024270	Slc39a6	solute carrier family 39 (metal ion transporter), member 6	0.0415934	0.684917	0.999996	0.433442	6.56577e-05	0.0228882	-0.0592244	0.714909	0.999994	0.332624	0.00237794	0.464114
ENSMUSG00000024327	Slc39a7	solute carrier family 39 (zinc transporter), member 7	-0.0349443	0.646962	0.999996	0.277256	0.000374515	0.473483	-0.025762	0.846131	0.999994	0.286438	0.000884592	0.73484
ENSMUSG00000053897	Slc39a8	solute carrier family 39 (metal ion transporter), member 8	0.474402	0.0538662	0.260756	0.763915	0.00187121	0.0126125	0.180535	0.664288	0.999994	0.470048	0.0576115	0.409343
ENSMUSG00000048833	Slc39a9	solute carrier family 39 (zinc transporter), member 9	-0.178769	0.018486	0.999996	0.141957	0.0514109	0.999999	-0.176107	0.139078	0.999994	0.144618	0.0705437	0.999996
ENSMUSG00000024131	Slc3a1	solute carrier family 3, member 1	-0.952948	0.298968	0.604517	-0.542994	0.508357	0.836743	0.335571	0.819543	0.999994	0.745524	0.46381	0.999996
ENSMUSG00000039158	Akna	AT-hook transcription factor	1.57255	7.42021e-09	5.02807e-08	2.26718	1.07289e-11	4.0058e-11	-0.214242	0.45223	0.999994	0.480388	0.00288467	0.129632
ENSMUSG00000025993	Slc40a1	solute carrier family 40 (iron-regulated transporter), member 1	-0.277297	0.0159712	0.588937	-0.130118	0.237611	0.999999	-0.0926243	0.60894	0.999994	0.0545545	0.682346	0.999996
ENSMUSG00000013275	Slc41a1	solute carrier family 41, member 1	-0.157884	0.142596	0.999996	0.350511	0.00179408	0.189083	-0.160046	0.337186	0.999994	0.34835	0.00434643	0.431443
ENSMUSG00000043629	1700019D03Rik	RIKEN cDNA 1700019D03 gene	0.78513	0.00432852	0.031237	1.46027	4.82786e-06	2.80012e-05	-0.132194	0.788242	0.999994	0.542951	0.0354753	0.272666
ENSMUSG00000030089	Slc41a3	solute carrier family 41, member 3	0.599343	0.0132999	0.0943582	1.28574	7.29834e-06	5.20729e-05	-0.189706	0.644192	0.999994	0.496695	0.0370256	0.316636
ENSMUSG00000038178	Slc43a2	solute carrier family 43, member 2	-0.392132	0.122543	0.441862	-0.917675	0.000881896	0.00560884	0.128739	0.763272	0.999994	-0.396805	0.165808	0.704633
ENSMUSG00000070828	Zscan4f	zinc finger and SCAN domain containing 4F	-2.35769	0.000375575	0.00145378	-2.82313	0.000101342	0.000265148	-0.317112	0.689296	0.999994	-0.782545	0.328154	0.881128
ENSMUSG00000057193	Slc44a2	solute carrier family 44, member 2	-0.272918	0.00437371	0.597569	-0.0118316	0.908705	0.999999	-0.0855185	0.554131	0.999994	0.175568	0.072501	0.999996
ENSMUSG00000039865	Slc44a3	solute carrier family 44, member 3	-0.0806583	0.191758	0.999996	0.197026	0.00215903	0.999999	-0.0415403	0.688463	0.999994	0.236144	0.00128144	0.999996
ENSMUSG00000007034	Slc44a4	solute carrier family 44, member 4	-0.395665	0.00184384	0.14744	-0.109451	0.339423	0.999999	-0.0459907	0.828733	0.999994	0.240224	0.0583627	0.999996
ENSMUSG00000026435	Slc45a3	solute carrier family 45, member 3	-0.511176	2.29376e-05	0.00596604	-0.21477	0.0231049	0.87459	-0.0402979	0.813774	0.999994	0.256108	0.017101	0.999996
ENSMUSG00000079020	Slc45a4	solute carrier family 45, member 4	-0.305465	0.00638026	0.442148	-0.075542	0.484976	0.999999	-0.188889	0.249906	0.999994	0.0410347	0.751681	0.999996
ENSMUSG00000020829	Slc46a1	solute carrier family 46, member 1	0.276849	0.0584511	0.607574	0.74385	1.75352e-05	0.000442865	-0.161948	0.493018	0.999994	0.305053	0.0442916	0.754719
ENSMUSG00000029650	Slc46a3	solute carrier family 46, member 3	0.074542	0.808606	0.999996	0.762777	0.00592306	0.0295554	-0.20481	0.664154	0.999994	0.483425	0.0913256	0.475856
ENSMUSG00000010122	Slc47a1	solute carrier family 47, member 1	-1.18909	0.0842019	0.231332	-1.0737	0.088235	0.197378	0.319152	0.760872	0.999994	0.434538	0.592454	0.999996
ENSMUSG00000081534	Slc48a1	solute carrier family 48 (heme transporter), member 1	0.0128634	0.887613	0.999996	0.0680072	0.389516	0.999999	0.0924369	0.45674	0.999994	0.147581	0.084145	0.999996
ENSMUSG00000074796	Slc4a11	solute carrier family 4, sodium bicarbonate transporter-like, member 11	-0.1009	0.304562	0.999996	-0.0401718	0.695728	0.999999	0.0861845	0.582333	0.999994	0.146913	0.161441	0.999996
ENSMUSG00000028962	Slc4a2	solute carrier family 4 (anion exchanger), member 2	-0.238699	0.00636334	0.824164	-0.0418396	0.628949	0.999999	-0.0404953	0.780514	0.999994	0.156364	0.0823584	0.999996
ENSMUSG00000006576	Slc4a3	solute carrier family 4 (anion exchanger), member 3	0.0106064	0.950371	0.999996	0.298843	0.0361297	0.449424	-0.016236	0.95549	0.999994	0.272001	0.0798378	0.913111
ENSMUSG00000060961	Slc4a4	solute carrier family 4 (anion exchanger), member 4	-0.427956	0.0295514	0.238296	-0.879411	0.000204422	0.00165977	-0.0712345	0.835226	0.999994	-0.522689	0.0179148	0.20123
ENSMUSG00000021733	Slc4a7	solute carrier family 4, sodium bicarbonate cotransporter, member 7	-0.0254489	0.841372	0.999996	0.225733	0.0429046	0.780616	-0.0772055	0.686651	0.999994	0.173977	0.153063	0.999996
ENSMUSG00000073437	D330041H03Rik	RIKEN cDNA D330041H03 gene	0.621015	0.00184658	0.0277455	1.28385	4.03376e-07	3.40512e-06	-0.363244	0.231688	0.999994	0.299588	0.108896	0.831062
ENSMUSG00000027953	Slc50a1	solute carrier family 50 (sugar transporter), member 1	0.277096	0.00314104	0.570872	0.350146	0.0002734	0.135382	0.143863	0.294112	0.999994	0.216913	0.0224607	0.999996
ENSMUSG00000022560	Slc52a2	solute carrier protein 52, member 2	0.047269	0.678259	0.999996	0.27744	0.00896949	0.509572	-0.0598036	0.746839	0.999994	0.170368	0.129366	0.999996
ENSMUSG00000027463	Slc52a3	solute carrier protein family 52, member 3	-0.354014	0.211933	0.58334	-0.961765	0.00133658	0.00770804	0.256108	0.553047	0.999994	-0.351642	0.279073	0.895599
ENSMUSG00000041644	Slc5a12	solute carrier family 5 (sodium/glucose cotransporter), member 12	-1.04389	0.289997	0.588967	-0.68434	0.366693	0.655485	0.939582	0.447862	0.999994	1.29914	0.203682	0.619558
ENSMUSG00000030781	Slc5a2	solute carrier family 5 (sodium/glucose cotransporter), member 2	-1.02184	0.376656	0.713681	-0.387096	0.697388	0.999999	0.709989	0.664043	0.999994	1.34473	0.264096	0.740408
ENSMUSG00000089774	Slc5a3	solute carrier family 5 (inositol transporters), member 3	-0.581885	0.00961765	0.0786116	-0.215525	0.289968	0.786607	-0.247977	0.433571	0.999994	0.118384	0.625773	0.999996
ENSMUSG00000006641	Slc5a6	solute carrier family 5 (sodium-dependent vitamin transporter), member 6	0.144629	0.167671	0.999996	0.799104	6.96662e-08	2.99177e-06	-0.0699241	0.697027	0.999994	0.584551	3.63653e-05	0.00497524
ENSMUSG00000027894	Slc6a17	solute carrier family 6 (neurotransmitter transporter), member 17	-0.189343	0.0474466	0.999996	0.541624	4.43413e-06	0.00114247	-0.283684	0.0854246	0.999994	0.447283	0.000206399	0.0610805
ENSMUSG00000021612	Slc6a18	solute carrier family 6 (neurotransmitter transporter), member 18	-1.43907	0.0253774	0.0829799	-1.6556	0.00670281	0.0180021	0.412113	0.641276	0.999994	0.195586	0.815476	0.999996
ENSMUSG00000021565	Slc6a19	solute carrier family 6 (neurotransmitter transporter), member 19	-0.441845	0.010483	0.165416	-0.623195	0.000433761	0.00844082	0.247865	0.317803	0.999994	0.0665142	0.745324	0.999996
ENSMUSG00000064363	mt-Nd4	mitochondrially encoded NADH dehydrogenase 4	0.627087	0.000160607	0.00596604	1.28958	1.02763e-08	9.97126e-08	-0.101075	0.66885	0.999994	0.561415	0.00100596	0.0457751
ENSMUSG00000019558	Slc6a8	solute carrier family 6 (neurotransmitter transporter, creatine), member 8	-0.420736	3.31048e-05	0.0281451	-0.0811408	0.313617	0.999999	-0.0931325	0.460679	0.999994	0.246463	0.00787173	0.999996
ENSMUSG00000001918	Slc1a5	solute carrier family 1 (neutral amino acid transporter), member 5	0.731421	8.2666e-07	5.43146e-05	1.39222	3.18027e-11	2.59151e-10	-0.118525	0.488502	0.999994	0.542274	7.11465e-05	0.0112338
ENSMUSG00000041313	Slc7a1	solute carrier family 7 (cationic amino acid transporter, y+ system), member 1	0.273332	0.00271641	0.591954	0.53636	1.34277e-06	0.000576598	-0.13389	0.311172	0.999994	0.129138	0.157701	0.999996
ENSMUSG00000104713	Gbp6	guanylate binding protein 6	0.509709	3.09897e-05	0.0071339	1.13824	1.87106e-10	3.18942e-09	-0.0749961	0.659722	0.999994	0.553533	2.90672e-05	0.00593843
ENSMUSG00000041052	Slc7a13	solute carrier family 7, (cationic amino acid transporter, y+ system) member 13	-0.799055	0.456216	0.815179	-0.395098	0.678364	0.999999	0.618366	0.69403	0.999994	1.02232	0.363272	0.917317
ENSMUSG00000022756	Slc7a4	solute carrier family 7 (cationic amino acid transporter, y+ system), member 4	-0.546387	0.000215947	0.0137312	-0.0414051	0.760625	0.999999	-0.198269	0.306182	0.999994	0.306713	0.0289397	0.730345
ENSMUSG00000040010	Slc7a5	solute carrier family 7 (cationic amino acid transporter, y+ system), member 5	0.228573	0.0155214	0.870289	0.494367	1.0641e-05	0.00375743	-0.115991	0.415286	0.999994	0.149804	0.128124	0.999996
ENSMUSG00000031904	Slc7a6	solute carrier family 7 (cationic amino acid transporter, y+ system), member 6	0.0365133	0.690606	0.999996	0.107774	0.195523	0.999999	-0.0194442	0.904588	0.999994	0.0518164	0.598072	0.999996
ENSMUSG00000000958	Slc7a7	solute carrier family 7 (cationic amino acid transporter, y+ system), member 7	0.493804	0.221283	0.550469	0.065702	0.878178	0.999999	0.47232	0.450755	0.999994	0.0442185	0.928287	0.999996
ENSMUSG00000032754	Slc8b1	solute carrier family 8 (sodium/lithium/calcium exchanger), member B1	-0.368686	0.000234996	0.125747	-7.10338e-05	0.999496	0.999999	-0.203939	0.139226	0.999994	0.164676	0.0795268	0.999996
ENSMUSG00000028854	Slc9a1	solute carrier family 9 (sodium/hydrogen exchanger), member 1	-0.302244	0.00371292	0.440441	-0.118717	0.2209	0.999999	-0.216898	0.160363	0.999994	-0.033371	0.782146	0.999996
ENSMUSG00000039518	Cdsn	corneodesmosin	2.37664	4.47057e-13	1.04566e-12	2.98902	2.29816e-15	3.98022e-15	-0.0475423	0.843731	0.999994	0.564841	6.83261e-05	0.00893901
ENSMUSG00000014786	Slc9a5	solute carrier family 9 (sodium/hydrogen exchanger), member 5	0.306674	0.211333	0.62729	0.0626566	0.811024	0.999999	0.278121	0.469067	0.999994	0.0341035	0.910651	0.999996
ENSMUSG00000060681	Slc9a6	solute carrier family 9 (sodium/hydrogen exchanger), member 6	-0.302795	0.00602167	0.450945	-0.0904189	0.384895	0.999999	-0.0902713	0.591075	0.999994	0.122105	0.288576	0.999996
ENSMUSG00000037341	Slc9a7	solute carrier family 9 (sodium/hydrogen exchanger), member 7	0.327549	0.296631	0.693799	0.0361517	0.917425	0.999999	0.178384	0.743924	0.999994	-0.113014	0.756681	0.999996
ENSMUSG00000039463	Slc9a8	solute carrier family 9 (sodium/hydrogen exchanger), member 8	-0.0643178	0.451809	0.999996	0.158499	0.0520057	0.999999	-0.119158	0.355	0.999994	0.103659	0.249643	0.999996
ENSMUSG00000014599	Csf1	colony stimulating factor 1 (macrophage)	0.4724	0.000268599	0.0319507	1.07484	4.86089e-09	8.79478e-08	-0.245543	0.168219	0.999994	0.356894	0.00458041	0.403406
ENSMUSG00000032826	Ank2	ankyrin 2, brain	0.904335	0.00801998	0.0455385	1.50377	4.84668e-05	0.00022704	-0.0959868	0.886242	0.999994	0.503447	0.109631	0.513834
ENSMUSG00000027955	Fam198b	family with sequence similarity 198, member B	1.20766	6.05865e-07	6.79808e-06	1.80121	7.92734e-10	3.74503e-09	0.138841	0.617545	0.999994	0.732389	0.000186778	0.00580342
ENSMUSG00000025938	Slco5a1	solute carrier organic anion transporter family, member 5A1	-0.267166	0.221339	0.702509	-0.776547	0.00132939	0.00953744	-0.149928	0.678652	0.999994	-0.659309	0.010235	0.109569
ENSMUSG00000030741	Spns1	spinster homolog 1	0.111122	0.260204	0.999996	0.357627	0.000631373	0.141876	0.0655468	0.692831	0.999994	0.312052	0.00466616	0.61534
ENSMUSG00000040447	Spns2	spinster homolog 2	-0.276151	0.00306949	0.576746	-0.328997	0.000523149	0.211946	0.00992847	0.953902	0.999994	-0.0429176	0.677994	0.999996
ENSMUSG00000020798	Spns3	spinster homolog 3	-0.0730782	0.54416	0.999996	-0.505765	0.00012565	0.0116649	0.057221	0.774381	0.999994	-0.375465	0.00498232	0.348323
ENSMUSG00000104528	Gm43314	predicted gene 43314	1.21534	0.00367329	0.0178532	1.80134	8.19987e-05	0.000299113	-0.310705	0.686651	0.999994	0.275298	0.473841	0.999996
ENSMUSG00000024339	Tap2	transporter 2, ATP-binding cassette, sub-family B (MDR/TAP)	0.122585	0.261234	0.999996	0.767038	2.46711e-07	1.15943e-05	-0.130472	0.444129	0.999994	0.513981	0.000179564	0.0269469
ENSMUSG00000039530	Tusc3	tumor suppressor candidate 3	0.200147	0.0100087	0.999996	-0.0755832	0.307545	0.999999	0.144403	0.211818	0.999994	-0.131327	0.102846	0.999996
ENSMUSG00000060519	Tor3a	torsin family 3, member A	0.386416	1.75341e-05	0.0439415	0.968299	2.19706e-11	6.67416e-10	-0.107325	0.336243	0.999994	0.474559	8.76425e-06	0.0071442
ENSMUSG00000026469	Xpr1	xenotropic and polytropic retrovirus receptor 1	0.0707594	0.507513	0.999996	0.398181	0.000401247	0.0715033	-0.143121	0.373958	0.999994	0.1843	0.0937147	0.999996
ENSMUSG00000021260	Hhipl1	hedgehog interacting protein-like 1	1.7442	8.71365e-06	4.78644e-05	2.32327	8.5319e-08	2.90445e-07	-0.0410596	0.952829	0.999994	0.538017	0.0483858	0.325528
ENSMUSG00000027950	Chrnb2	cholinergic receptor, nicotinic, beta polypeptide 2 (neuronal)	1.32131	0.00167776	0.0086014	1.89121	3.55214e-05	0.000131671	-0.286211	0.70826	0.999994	0.283692	0.447331	0.999996
ENSMUSG00000031486	Adgra2	adhesion G protein-coupled receptor A2	-0.281272	0.0952986	0.607701	0.207665	0.204071	0.799964	-0.183938	0.485264	0.999994	0.304999	0.0916608	0.79891
ENSMUSG00000029090	Adgra3	adhesion G protein-coupled receptor A3	-0.00170739	0.988114	0.999996	0.456809	7.76343e-05	0.01733	-0.0887216	0.591075	0.999994	0.369794	0.00181188	0.295065
ENSMUSG00000028782	Adgrb2	adhesion G protein-coupled receptor B2	-0.205209	0.197983	0.876574	0.188724	0.227586	0.870901	-0.227596	0.357069	0.999994	0.166337	0.340865	0.999996
ENSMUSG00000020176	Grb10	growth factor receptor bound protein 10	0.543683	5.06655e-05	0.00628991	1.10316	1.8853e-09	3.31961e-08	-0.156788	0.373159	0.999994	0.402684	0.00143848	0.196712
ENSMUSG00000031785	Adgrg1	adhesion G protein-coupled receptor G1	-0.298439	0.0761578	0.553237	-0.00117732	0.995664	0.999999	-0.0969444	0.732123	0.999994	0.200318	0.268905	0.999996
ENSMUSG00000039116	Adgrg6	adhesion G protein-coupled receptor G6	-0.402668	0.000816372	0.109929	-0.138969	0.190022	0.999999	-0.186269	0.260633	0.999994	0.0774304	0.532934	0.999996
ENSMUSG00000013033	Adgrl1	adhesion G protein-coupled receptor L1	-0.312885	0.00280957	0.382794	-0.149776	0.12091	0.999999	-0.244811	0.122191	0.999994	-0.0817013	0.460457	0.999996
ENSMUSG00000002908	Kcnn1	potassium intermediate/small conductance calcium-activated channel, subfamily N, member 1	0.794608	1.94763e-05	0.000497656	1.34623	7.05894e-09	6.71421e-08	-0.148303	0.557696	0.999994	0.403316	0.00895322	0.317529
ENSMUSG00000069170	Adgrv1	adhesion G protein-coupled receptor V1	0.924186	0.010676	0.0546701	0.940372	0.00876895	0.0338953	-0.13451	0.848532	0.999994	-0.118325	0.764924	0.999996
ENSMUSG00000042429	Adora1	adenosine A1 receptor	-0.482382	7.28792e-05	0.0155176	0.0699414	0.489568	0.999999	-0.140679	0.363263	0.999994	0.411645	0.000813576	0.152138
ENSMUSG00000053964	Lgals4	lectin, galactose binding, soluble 4	1.03321	0.000701507	0.00568801	1.57787	2.57336e-06	1.35065e-05	0.0748382	0.902449	0.999994	0.619492	0.0206743	0.176615
ENSMUSG00000016028	Celsr1	cadherin, EGF LAG seven-pass G-type receptor 1	-0.2138	0.0479524	0.912418	0.0736057	0.501822	0.999999	-0.270093	0.122413	0.999994	0.0173128	0.8997	0.999996
ENSMUSG00000068740	Celsr2	cadherin, EGF LAG seven-pass G-type receptor 2	-0.422666	0.00259913	0.122707	-0.0331257	0.816111	0.999999	-0.341714	0.110806	0.999994	0.0478268	0.761043	0.999996
ENSMUSG00000048376	F2r	coagulation factor II (thrombin) receptor	-0.167462	0.042417	0.999996	-0.132452	0.0979362	0.999999	0.0137306	0.932948	0.999994	0.0487404	0.609508	0.999996
ENSMUSG00000038085	Cnbd2	cyclic nucleotide binding domain containing 2	0.816509	5.87881e-05	0.00108546	1.35891	2.63205e-08	2.3213e-07	0.0517647	0.876755	0.999994	0.59417	0.00119834	0.0419296
ENSMUSG00000044674	Fzd1	frizzled class receptor 1	-0.506693	0.000277801	0.0227038	-0.376648	0.00290684	0.153688	-0.186087	0.315869	0.999994	-0.0560423	0.703346	0.999996
ENSMUSG00000050288	Fzd2	frizzled class receptor 2	0.24003	0.23547	0.767833	0.489712	0.0155852	0.113928	-0.140792	0.684034	0.999994	0.10889	0.636987	0.999996
ENSMUSG00000007989	Fzd3	frizzled class receptor 3	-0.0564509	0.746058	0.999996	0.144252	0.372767	0.999999	-0.253918	0.313117	0.999994	-0.0532143	0.785647	0.999996
ENSMUSG00000049791	Fzd4	frizzled class receptor 4	-0.514575	0.000152096	0.0154568	-0.399013	0.00141983	0.10096	-0.30285	0.109876	0.999994	-0.187288	0.147082	0.999996
ENSMUSG00000045005	Fzd5	frizzled class receptor 5	-0.526042	2.12187e-05	0.00476891	-0.397458	0.000291551	0.0660414	-0.194083	0.198638	0.999994	-0.0654987	0.573117	0.999996
ENSMUSG00000022297	Fzd6	frizzled class receptor 6	-0.173797	0.056999	0.999996	0.0585122	0.527485	0.999999	-0.168503	0.229147	0.999994	0.0638058	0.538192	0.999996
ENSMUSG00000041075	Fzd7	frizzled class receptor 7	-0.279171	0.131133	0.632141	0.207753	0.249008	0.801762	-0.205331	0.47652	0.999994	0.281593	0.157431	0.910235
ENSMUSG00000036904	Fzd8	frizzled class receptor 8	-0.110976	0.607953	0.999996	0.458325	0.0259616	0.162135	-0.408008	0.206575	0.999994	0.161293	0.479744	0.999996
ENSMUSG00000024462	Gabbr1	gamma-aminobutyric acid (GABA) B receptor, 1	0.126664	0.315509	0.999996	0.00263591	0.985836	0.999999	-0.0351853	0.881741	0.999994	-0.159214	0.240196	0.999996
ENSMUSG00000064272	Gpbar1	G protein-coupled bile acid receptor 1	-0.31606	0.275588	0.67755	-1.17614	0.000216047	0.00123394	0.470907	0.256845	0.999994	-0.389174	0.242147	0.823375
ENSMUSG00000000194	Gpr107	G protein-coupled receptor 107	-0.0824477	0.301385	0.999996	0.167095	0.0318535	0.999999	-0.058022	0.659086	0.999994	0.191521	0.0261424	0.999996
ENSMUSG00000005823	Gpr108	G protein-coupled receptor 108	0.18643	0.0578045	0.999996	0.50681	1.43977e-05	0.00370674	0.000825788	0.996451	0.999994	0.321206	0.00361224	0.553035
ENSMUSG00000024958	Gpr137	G protein-coupled receptor 137	-0.102186	0.320579	0.999996	-0.013459	0.906476	0.999999	0.0653498	0.701945	0.999994	0.154076	0.15846	0.999996
ENSMUSG00000044197	Gpr146	G protein-coupled receptor 146	-0.114748	0.296174	0.999996	-0.0138514	0.910316	0.999999	-0.0268365	0.894736	0.999994	0.0740606	0.552162	0.999996
ENSMUSG00000047875	Gpr157	G protein-coupled receptor 157	-0.521261	0.0694076	0.272668	0.0467622	0.883063	0.999999	-0.277504	0.536439	0.999994	0.29052	0.362331	0.999996
ENSMUSG00000037661	Gpr160	G protein-coupled receptor 160	-0.0520888	0.69347	0.999996	-0.0690242	0.578226	0.999999	0.129651	0.498609	0.999994	0.112715	0.40387	0.999996
ENSMUSG00000040836	Gpr161	G protein-coupled receptor 161	-0.213867	0.0431244	0.917436	-0.0416784	0.708607	0.999999	-0.124921	0.442532	0.999994	0.0472679	0.706945	0.999996
ENSMUSG00000038390	Gpr162	G protein-coupled receptor 162	-0.127441	0.75156	0.999996	0.16666	0.668357	0.999999	-0.195895	0.761045	0.999994	0.0982059	0.830592	0.999996
ENSMUSG00000056679	Gpr173	G-protein coupled receptor 173	-0.268575	0.24655	0.71441	0.476788	0.0386814	0.178958	-0.496448	0.173095	0.999994	0.248915	0.32268	0.999996
ENSMUSG00000032641	Gpr19	G protein-coupled receptor 19	0.25023	0.027621	0.726365	0.104279	0.335414	0.999999	0.26717	0.137427	0.999994	0.121219	0.308742	0.999996
ENSMUSG00000026271	Gpr35	G protein-coupled receptor 35	-0.660939	0.00678229	0.0540638	-0.961467	0.000285941	0.00211813	-0.0993906	0.805612	0.999994	-0.399918	0.135561	0.650434
ENSMUSG00000026343	Gpr39	G protein-coupled receptor 39	-0.280465	0.0288216	0.583299	-0.225592	0.0651889	0.765796	0.0504519	0.824766	0.999994	0.105326	0.45885	0.999996
ENSMUSG00000044317	Gpr4	G protein-coupled receptor 4	-0.235647	0.442184	0.884184	-0.663602	0.0368363	0.125654	-0.269348	0.574739	0.999994	-0.697304	0.0449239	0.257276
ENSMUSG00000040372	Gpr63	G protein-coupled receptor 63	0.102603	0.774992	0.999996	0.320582	0.275387	0.61412	0.00387242	0.994634	0.999994	0.221851	0.506706	0.999996
ENSMUSG00000039578	Ccser1	coiled-coil serine rich 1	0.59378	0.00264134	0.0391853	1.13152	1.3843e-06	1.56606e-05	-0.0597778	0.869892	0.999994	0.477965	0.012339	0.222073
ENSMUSG00000079484	Phyhd1	phytanoyl-CoA dioxygenase domain containing 1	0.590133	0.000236603	0.0100655	1.1271	3.17841e-08	4.7125e-07	-0.0801898	0.750371	0.999994	0.456775	0.00263778	0.148409
ENSMUSG00000040713	Creg1	cellular repressor of E1A-stimulated genes 1	0.703039	3.35401e-06	0.00022363	1.2294	3.79185e-10	5.05078e-09	-0.00727128	0.97337	0.999994	0.519093	0.000153073	0.0233615
ENSMUSG00000008734	Gprc5b	G protein-coupled receptor, family C, group 5, member B	-0.634532	0.000292937	0.00846422	-0.202818	0.165587	0.827902	-0.118941	0.623064	0.999994	0.312772	0.0612209	0.742887
ENSMUSG00000055725	Paqr3	progestin and adipoQ receptor family member III	1.22157	7.01025e-09	8.37364e-08	1.74333	1.06792e-11	5.26948e-11	-0.0941144	0.675051	0.999994	0.427646	0.00137215	0.152639
ENSMUSG00000050199	Lgr4	leucine-rich repeat-containing G protein-coupled receptor 4	-0.317439	0.0833574	0.509183	-0.0312774	0.876288	0.999999	-0.13841	0.640765	0.999994	0.147752	0.465764	0.999996
ENSMUSG00000030685	Kctd13	potassium channel tetramerisation domain containing 13	0.584158	1.23128e-06	0.000337269	1.10419	4.49681e-11	8.32778e-10	-0.0765162	0.597615	0.999994	0.443519	7.34566e-05	0.0390312
ENSMUSG00000006205	Htra1	HtrA serine peptidase 1	0.877296	9.64823e-08	3.01084e-06	1.3903	4.18315e-11	3.44648e-10	0.119517	0.478387	0.999994	0.632519	2.3463e-05	0.00227039
ENSMUSG00000031861	Lpar2	lysophosphatidic acid receptor 2	-0.0649331	0.504474	0.999996	0.225934	0.0153706	0.81522	-0.0760407	0.621748	0.999994	0.214826	0.0338465	0.999996
ENSMUSG00000033446	Lpar6	lysophosphatidic acid receptor 6	0.0332019	0.824847	0.999996	-0.108354	0.42467	0.999999	-0.0215226	0.937011	0.999994	-0.163079	0.267527	0.999996
ENSMUSG00000048965	Mrgpre	MAS-related GPR, member E	-0.0645672	0.819066	0.999996	0.33457	0.170051	0.491262	-0.0810093	0.866742	0.999994	0.318128	0.238583	0.887919
ENSMUSG00000032122	Slc37a2	solute carrier family 37 (glycerol-3-phosphate transporter), member 2	0.835706	0.00293394	0.0217011	1.34734	1.01912e-05	6.4401e-05	0.149831	0.7553	0.999994	0.661469	0.0121738	0.119719
ENSMUSG00000025232	Hexa	hexosaminidase A	0.435207	1.47399e-05	0.0153715	0.944768	1.32309e-10	4.38001e-09	-0.0677875	0.603158	0.999994	0.441773	4.15424e-05	0.0302744
ENSMUSG00000032860	P2ry2	purinergic receptor P2Y, G-protein coupled 2	-0.546868	4.1933e-05	0.00546666	-0.34777	0.00210728	0.200711	-0.0891279	0.605329	0.999994	0.109969	0.368572	0.999996
ENSMUSG00000040543	Pitpnm3	PITPNM family member 3	0.0336318	0.83057	0.999996	0.157516	0.26055	0.991722	-0.111686	0.635074	0.999994	0.0121985	0.946821	0.999996
ENSMUSG00000048388	Fam171b	family with sequence similarity 171, member B	1.5015	5.85493e-07	4.59466e-06	2.00638	4.16609e-09	1.71889e-08	-0.199987	0.604986	0.999994	0.304891	0.127304	0.828468
ENSMUSG00000032492	Pth1r	parathyroid hormone 1 receptor	-0.688717	0.435265	0.795078	-0.707354	0.354632	0.638985	0.614331	0.627958	0.999994	0.595694	0.540216	0.999996
ENSMUSG00000005124	Ccn4	cellular communication network factor 4	1.23738	0.000497744	0.00330113	1.74182	7.04454e-06	3.06388e-05	-0.149604	0.814106	0.999994	0.354835	0.245188	0.857766
ENSMUSG00000001761	Smo	smoothened, frizzled class receptor	0.0840947	0.225411	0.999996	0.342389	2.77398e-05	0.101509	-0.123364	0.249687	0.999994	0.13493	0.0691757	0.999996
ENSMUSG00000002871	Tpra1	transmembrane protein, adipocyte asscociated 1	0.0442747	0.671723	0.999996	0.0609897	0.534244	0.999999	0.0676691	0.677211	0.999994	0.0843841	0.431798	0.999996
ENSMUSG00000055538	Zcchc24	zinc finger, CCHC domain containing 24	1.23665	0.00564129	0.0254715	1.74033	5.70242e-05	0.0002223	0.388984	0.614452	0.999994	0.892666	0.017627	0.122501
ENSMUSG00000025375	Aatk	apoptosis-associated tyrosine kinase	-0.55518	0.0120568	0.102912	-0.0322708	0.890723	0.999999	-0.147848	0.672636	0.999994	0.375062	0.105616	0.638959
ENSMUSG00000026842	Abl1	c-abl oncogene 1, non-receptor tyrosine kinase	-0.237441	0.0330922	0.793967	0.154624	0.149277	0.999999	-0.134819	0.42583	0.999994	0.257246	0.0317793	0.990036
ENSMUSG00000026596	Abl2	v-abl Abelson murine leukemia viral oncogene 2 (arg, Abelson-related gene)	-0.125669	0.198442	0.999996	-0.019448	0.859211	0.999999	-0.168777	0.262655	0.999994	-0.0625563	0.580084	0.999996
ENSMUSG00000026836	Acvr1	activin A receptor, type 1	0.0112313	0.925064	0.999996	0.15152	0.131366	0.999999	-0.0290411	0.881696	0.999994	0.111248	0.320793	0.999996
ENSMUSG00000000532	Acvr1b	activin A receptor, type 1B	-0.311024	0.0028426	0.391636	-0.109793	0.252123	0.999999	-0.149364	0.32019	0.999994	0.0518662	0.652725	0.999996
ENSMUSG00000052155	Acvr2a	activin receptor IIA	-0.141799	0.154502	0.999996	-0.0941223	0.34152	0.999999	-0.0306427	0.870866	0.999994	0.0170338	0.893633	0.999996
ENSMUSG00000061393	Acvr2b	activin receptor IIB	0.016012	0.935749	0.999996	0.147576	0.391221	0.984092	-0.0443301	0.890722	0.999994	0.0872335	0.665814	0.999996
ENSMUSG00000000530	Acvrl1	activin A receptor, type II-like 1	0.158594	0.475041	0.999996	0.56521	0.00490761	0.045447	0.00739623	0.999381	0.999994	0.414012	0.0484598	0.457555
ENSMUSG00000024302	Dtna	dystrobrevin alpha	0.82546	6.51208e-05	0.00113264	1.32088	7.75995e-08	7.02383e-07	-0.151241	0.612599	0.999994	0.344174	0.0451402	0.617816
ENSMUSG00000046947	Adck2	aarF domain containing kinase 2	0.270328	0.0326055	0.626413	0.604325	2.70452e-05	0.00175183	0.0699938	0.750021	0.999994	0.403991	0.0035078	0.248827
ENSMUSG00000022550	Adck5	aarF domain containing kinase 5	0.189027	0.0720681	0.999996	0.16427	0.104969	0.999999	0.16894	0.301439	0.999994	0.144183	0.196223	0.999996
ENSMUSG00000028542	Slc6a9	solute carrier family 6 (neurotransmitter transporter, glycine), member 9	0.896244	6.76065e-08	2.08613e-06	1.38944	3.71846e-11	3.06079e-10	-0.0387313	0.849921	0.999994	0.454466	0.000370985	0.0704001
ENSMUSG00000025236	Adpgk	ADP-dependent glucokinase	0.301771	0.00540456	0.452531	0.533824	1.30597e-05	0.00243527	0.0923616	0.581718	0.999994	0.324415	0.00456666	0.547328
ENSMUSG00000039081	Zfp503	zinc finger protein 503	-1.12336	4.38402e-05	0.000466017	-0.634505	0.00606789	0.0393244	-0.421802	0.203225	0.999994	0.0670498	0.819782	0.999996
ENSMUSG00000026817	Ak1	adenylate kinase 1	-0.0174359	0.950834	0.999996	0.686571	0.00377495	0.0249533	0.100558	0.819654	0.999994	0.804565	0.00278194	0.0351859
ENSMUSG00000028792	Ak2	adenylate kinase 2	0.115044	0.107885	0.999996	0.0723795	0.30579	0.999999	0.0811007	0.469711	0.999994	0.0384357	0.64703	0.999996
ENSMUSG00000024782	Ak3	adenylate kinase 3	0.0400393	0.551548	0.999996	0.218117	0.00128258	0.962893	0.0252734	0.831272	0.999994	0.203351	0.00515653	0.999996
ENSMUSG00000028527	Ak4	adenylate kinase 4	-0.127007	0.182867	0.999996	-0.291887	0.00313423	0.417065	0.0925551	0.542195	0.999994	-0.0723245	0.503678	0.999996
ENSMUSG00000078941	Ak6	adenylate kinase 6	0.343573	0.000236603	0.18647	-0.010545	0.908951	0.999999	0.157647	0.207166	0.999994	-0.196471	0.0257902	0.999996
ENSMUSG00000001729	Akt1	thymoma viral proto-oncogene 1	-0.203769	0.00410291	0.999996	-0.138914	0.0358461	0.999999	-0.0295349	0.805778	0.999994	0.03532	0.654997	0.999996
ENSMUSG00000004056	Akt2	thymoma viral proto-oncogene 2	0.0048474	0.946793	0.999996	0.140772	0.0235323	0.999999	-0.048399	0.64048	0.999994	0.0875253	0.193699	0.999996
ENSMUSG00000019699	Akt3	thymoma viral proto-oncogene 3	-0.0132886	0.886109	0.999996	0.161202	0.0432075	0.999999	0.00148998	0.992541	0.999994	0.175981	0.0444572	0.999996
ENSMUSG00000028028	Alpk1	alpha-kinase 1	-0.0924454	0.521841	0.999996	0.0826957	0.568032	0.999999	-0.263142	0.226262	0.999994	-0.0880007	0.58536	0.999996
ENSMUSG00000001127	Araf	Araf proto-oncogene, serine/threonine kinase	0.174345	0.015063	0.999996	0.216471	0.00269285	0.948939	0.0871373	0.41898	0.999994	0.129264	0.0828928	0.999996
ENSMUSG00000034218	Atm	ataxia telangiectasia mutated	0.0345403	0.788654	0.999996	0.163224	0.159106	0.999999	-0.209234	0.252286	0.999994	-0.0805507	0.548236	0.999996
ENSMUSG00000032409	Atr	ataxia telangiectasia and Rad3 related	0.196822	0.0437662	0.999996	0.15373	0.105012	0.999999	-0.00390862	0.982972	0.999994	-0.0470004	0.679934	0.999996
ENSMUSG00000027496	Aurka	aurora kinase A	-0.0542144	0.448529	0.999996	-0.402367	4.36903e-06	0.0144256	0.073037	0.506805	0.999994	-0.275116	0.0010683	0.843536
ENSMUSG00000020897	Aurkb	aurora kinase B	-0.0952108	0.21545	0.999996	-0.688104	1.06478e-08	1.58126e-06	0.149093	0.206575	0.999994	-0.4438	4.10446e-05	0.0288789
ENSMUSG00000002602	Axl	AXL receptor tyrosine kinase	-0.112335	0.146752	0.999996	0.113318	0.134526	0.999999	-0.10144	0.399413	0.999994	0.124214	0.136003	0.999996
ENSMUSG00000030802	Bckdk	branched chain ketoacid dehydrogenase kinase	0.201497	0.0112374	0.999996	0.0412033	0.604222	0.999999	0.0514437	0.692831	0.999994	-0.10885	0.186213	0.999996
ENSMUSG00000034663	Bmp2k	BMP2 inducible kinase	-0.360914	0.00354014	0.23764	-0.359002	0.00301163	0.186644	-0.104779	0.569559	0.999994	-0.102867	0.428908	0.999996
ENSMUSG00000021796	Bmpr1a	bone morphogenetic protein receptor, type 1A	-0.170184	0.0291577	0.999996	-0.333425	0.000126699	0.159638	0.00665857	0.964284	0.999994	-0.156582	0.0607287	0.999996
ENSMUSG00000067336	Bmpr2	bone morphogenetic protein receptor, type II (serine/threonine kinase)	-0.303751	0.0272612	0.491896	-0.223014	0.0922891	0.767654	-0.204065	0.327248	0.999994	-0.123328	0.41019	0.999996
ENSMUSG00000002413	Braf	Braf transforming gene	0.00737098	0.954064	0.999996	0.201945	0.0634796	0.896555	-0.14611	0.397955	0.999994	0.0484638	0.714721	0.999996
ENSMUSG00000035390	Brsk1	BR serine/threonine kinase 1	0.131035	0.283997	0.999996	0.272399	0.0236632	0.545486	-0.0766492	0.71257	0.999994	0.0647156	0.645857	0.999996
ENSMUSG00000027379	Bub1	BUB1, mitotic checkpoint serine/threonine kinase	0.0492391	0.507654	0.999996	-0.445384	1.71647e-06	0.00358776	0.148435	0.181932	0.999994	-0.346188	0.000197292	0.254654
ENSMUSG00000032271	Nnmt	nicotinamide N-methyltransferase	1.26265	0.000613134	0.00386743	1.74482	1.56234e-05	6.59552e-05	-0.308231	0.620669	0.999994	0.173938	0.606571	0.999996
ENSMUSG00000030272	Camk1	calcium/calmodulin-dependent protein kinase I	0.28694	0.00110163	0.492362	0.268914	0.00133794	0.546636	0.110618	0.373958	0.999994	0.0925923	0.280442	0.999996
ENSMUSG00000039145	Camk1d	calcium/calmodulin-dependent protein kinase ID	0.0417732	0.854931	0.999996	0.0498297	0.8198	0.999999	0.19258	0.554131	0.999994	0.200636	0.366246	0.999996
ENSMUSG00000057897	Camk2b	calcium/calmodulin-dependent protein kinase II, beta	-0.588718	0.0345865	0.167463	-1.13439	0.000413855	0.00224957	-0.183165	0.682178	0.999994	-0.728835	0.0276972	0.184632
ENSMUSG00000053819	Camk2d	calcium/calmodulin-dependent protein kinase II, delta	-0.309401	0.000650571	0.355193	-0.309612	0.000451802	0.285489	0.00392614	0.978681	0.999994	0.00371543	0.972059	0.999996
ENSMUSG00000021820	Camk2g	calcium/calmodulin-dependent protein kinase II gamma	-0.158044	0.0353398	0.999996	0.0526797	0.48094	0.999999	-0.0967621	0.400122	0.999994	0.113961	0.154682	0.999996
ENSMUSG00000020785	Camkk1	calcium/calmodulin-dependent protein kinase kinase 1, alpha	-0.454573	0.000503507	0.0520131	-0.753738	8.55273e-07	3.84484e-05	0.131306	0.452635	0.999994	-0.167858	0.191683	0.999996
ENSMUSG00000029471	Camkk2	calcium/calmodulin-dependent protein kinase kinase 2, beta	-0.103386	0.236543	0.999996	0.0747386	0.389186	0.999999	-0.100627	0.457622	0.999994	0.0774979	0.422449	0.999996
ENSMUSG00000033170	Card10	caspase recruitment domain family, member 10	-0.203554	0.381365	0.90491	-0.20391	0.370163	0.839626	0.00329045	0.994454	0.999994	0.00293423	0.992729	0.999996
ENSMUSG00000013483	Card14	caspase recruitment domain family, member 14	-0.672274	0.100024	0.311723	-1.36974	0.00315134	0.0103663	-0.148786	0.836355	0.999994	-0.846253	0.0951697	0.39363
ENSMUSG00000031012	Cask	calcium/calmodulin-dependent serine protein kinase (MAGUK family)	-0.137916	0.118563	0.999996	0.156112	0.0694216	0.999999	-0.0726258	0.61319	0.999994	0.221402	0.0217132	0.999996
ENSMUSG00000026490	Cdc42bpa	CDC42 binding protein kinase alpha	-0.208148	0.0160299	0.999996	-0.0722491	0.392605	0.999999	-0.197761	0.142393	0.999994	-0.0618621	0.519425	0.999996
ENSMUSG00000021279	Cdc42bpb	CDC42 binding protein kinase beta	-0.413657	0.000742863	0.0921703	-0.15434	0.150069	0.999999	-0.161022	0.341311	0.999994	0.0982951	0.420142	0.999996
ENSMUSG00000024769	Cdc42bpg	CDC42 binding protein kinase gamma (DMPK-like)	-0.165424	0.10115	0.999996	0.275873	0.00709405	0.515756	-0.0692147	0.681588	0.999994	0.372082	0.00178762	0.286041
ENSMUSG00000019942	Cdk1	cyclin-dependent kinase 1	-0.0202354	0.818721	0.999996	-0.6481	3.98019e-08	8.03014e-06	0.191838	0.132673	0.999994	-0.436027	6.26063e-05	0.0400501
ENSMUSG00000105852	Gm42890	predicted gene 42890	1.15568	0.00355363	0.0181709	1.63132	0.00018525	0.00071365	-0.466662	0.49528	0.999994	0.00898015	0.983488	0.999996
ENSMUSG00000029062	Cdk11b	cyclin-dependent kinase 11B	0.0883601	0.189651	0.999996	0.0782075	0.234712	0.999999	0.133726	0.200206	0.999994	0.123574	0.0869484	0.999996
ENSMUSG00000003119	Cdk12	cyclin-dependent kinase 12	-0.151013	0.0904358	0.999996	0.0876243	0.321933	0.999999	-0.149333	0.279195	0.999994	0.0893043	0.363923	0.999996
ENSMUSG00000041297	Cdk13	cyclin-dependent kinase 13	-0.10834	0.26908	0.999996	0.173372	0.070244	0.999999	-0.203094	0.180255	0.999994	0.0786185	0.470927	0.999996
ENSMUSG00000028926	Cdk14	cyclin-dependent kinase 14	0.255031	0.125046	0.702079	0.246347	0.129935	0.663768	-0.0186325	0.95592	0.999994	-0.0273162	0.895492	0.999996
ENSMUSG00000031065	Cdk16	cyclin-dependent kinase 16	-0.194943	0.00567115	0.999996	0.0479597	0.476146	0.999999	-0.0728467	0.48775	0.999994	0.170056	0.0207586	0.999996
ENSMUSG00000020015	Cdk17	cyclin-dependent kinase 17	0.0329701	0.709629	0.999996	-0.118636	0.13866	0.999999	0.0694495	0.600799	0.999994	-0.0821567	0.36329	0.999996
ENSMUSG00000017652	Cd40	CD40 antigen	0.744487	0.000661726	0.00863049	1.21943	1.6164e-06	1.48542e-05	-0.226352	0.491017	0.999994	0.248587	0.209973	0.999996
ENSMUSG00000038481	Cdk19	cyclin-dependent kinase 19	-0.276775	0.00622467	0.580395	-0.196417	0.0396794	0.957672	-0.142455	0.338189	0.999994	-0.0620969	0.579987	0.999996
ENSMUSG00000025358	Cdk2	cyclin-dependent kinase 2	-0.199938	0.00319452	0.999996	-0.215863	0.0013277	0.980435	-0.00730144	0.953772	0.999994	-0.0232272	0.762834	0.999996
ENSMUSG00000021483	Cdk20	cyclin-dependent kinase 20	-0.0257909	0.9254	0.999996	0.111862	0.644242	0.999999	0.112222	0.788117	0.999994	0.249875	0.330821	0.999996
ENSMUSG00000006728	Cdk4	cyclin-dependent kinase 4	0.237188	0.00411666	0.846272	-0.0656839	0.401193	0.999999	0.103338	0.394646	0.999994	-0.199534	0.0200661	0.999996
ENSMUSG00000028969	Cdk5	cyclin-dependent kinase 5	0.198246	0.018746	0.999996	-0.103246	0.200337	0.999999	0.179225	0.167035	0.999994	-0.122268	0.167123	0.999996
ENSMUSG00000040274	Cdk6	cyclin-dependent kinase 6	0.0123822	0.905951	0.999996	0.00649245	0.951053	0.999999	-0.158141	0.262655	0.999994	-0.16403	0.0962801	0.999996
ENSMUSG00000069089	Cdk7	cyclin-dependent kinase 7	0.270111	0.00685528	0.617049	-0.0978841	0.298167	0.999999	0.192132	0.1964	0.999994	-0.175863	0.0851422	0.999996
ENSMUSG00000029635	Cdk8	cyclin-dependent kinase 8	-0.0296952	0.715629	0.999996	-0.128585	0.083338	0.999999	-0.116814	0.319445	0.999994	-0.215704	0.0105669	0.999996
ENSMUSG00000009555	Cdk9	cyclin-dependent kinase 9 (CDC2-related kinase)	0.0603436	0.48306	0.999996	0.136449	0.0922263	0.999999	0.0710351	0.598109	0.999994	0.14714	0.0989426	0.999996
ENSMUSG00000029060	Mib2	mindbomb E3 ubiquitin protein ligase 2	0.523098	0.000139166	0.0134125	0.993605	1.64079e-08	3.61743e-07	0.0770304	0.700727	0.999994	0.547538	0.00017187	0.0187774
ENSMUSG00000029403	Cdkl2	cyclin-dependent kinase-like 2 (CDC2-related kinase)	-0.00207148	0.987445	0.999996	-0.0609656	0.614206	0.999999	0.0226878	0.920121	0.999994	-0.0362063	0.800941	0.999996
ENSMUSG00000020389	Cdkl3	cyclin-dependent kinase-like 3	0.537783	0.0167741	0.128408	0.384767	0.0709264	0.315367	0.113497	0.7721	0.999994	-0.039519	0.882355	0.999996
ENSMUSG00000031292	Cdkl5	cyclin-dependent kinase-like 5	-0.409929	0.0516031	0.314227	-0.0198946	0.935221	0.999999	-0.407232	0.206964	0.999994	-0.0171984	0.950383	0.999996
ENSMUSG00000035891	Cerk	ceramide kinase	-0.589498	3.94815e-07	0.000131639	-0.268223	0.00142239	0.551552	-0.195388	0.123503	0.999994	0.125886	0.149805	0.999996
ENSMUSG00000032113	Chek1	checkpoint kinase 1	0.112456	0.156277	0.999996	-0.0655735	0.405997	0.999999	0.178046	0.157409	0.999994	1.67414e-05	0.999866	0.999996
ENSMUSG00000029521	Chek2	checkpoint kinase 2	0.157578	0.0365872	0.999996	-0.108474	0.136095	0.999999	0.143099	0.213623	0.999994	-0.122954	0.124192	0.999996
ENSMUSG00000024843	Chka	choline kinase alpha	0.141963	0.019325	0.999996	-0.0546304	0.355999	0.999999	0.00146469	0.989228	0.999994	-0.195128	0.0041459	0.999996
ENSMUSG00000022617	Chkb	choline kinase beta	0.113946	0.252779	0.999996	-0.042949	0.679179	0.999999	0.166073	0.278512	0.999994	0.00917779	0.942599	0.999996
ENSMUSG00000025199	Chuk	conserved helix-loop-helix ubiquitous kinase	0.00659613	0.927524	0.999996	-0.0402344	0.528796	0.999999	0.0794781	0.411645	0.999994	0.0326476	0.658415	0.999996
ENSMUSG00000029516	Cit	citron	-0.363679	0.00202435	0.209555	-0.540564	3.50216e-05	0.00397167	-0.271537	0.123503	0.999994	-0.448422	0.000898663	0.108656
ENSMUSG00000001270	Ckb	creatine kinase, brain	-0.338826	0.281938	0.669664	-1.01108	0.00270835	0.0124596	0.0643046	0.912154	0.999994	-0.607948	0.0898776	0.425274
ENSMUSG00000028044	Cks1b	CDC28 protein kinase 1b	0.0700835	0.405989	0.999996	-0.407692	3.03402e-05	0.026634	0.0247531	0.874841	0.999994	-0.453022	6.26063e-05	0.031175
ENSMUSG00000062248	Cks2	CDC28 protein kinase regulatory subunit 2	0.10817	0.352604	0.999996	-0.72554	1.88526e-06	8.70021e-05	0.0136495	0.952829	0.999994	-0.82006	6.4807e-06	0.000212199
ENSMUSG00000026034	Clk1	CDC-like kinase 1	0.160052	0.0148499	0.999996	-0.073167	0.24317	0.999999	0.283412	0.0169706	0.999994	0.0501932	0.483645	0.999996
ENSMUSG00000068917	Clk2	CDC-like kinase 2	0.0429725	0.620017	0.999996	0.106696	0.180283	0.999999	0.112298	0.374829	0.999994	0.176021	0.0456903	0.999996
ENSMUSG00000032316	Clk3	CDC-like kinase 3	0.103174	0.257441	0.999996	0.116755	0.183696	0.999999	0.191802	0.171232	0.999994	0.205383	0.0353486	0.999996
ENSMUSG00000020385	Clk4	CDC like kinase 4	0.216652	0.0106946	0.963195	-0.086761	0.280551	0.999999	0.262049	0.0686312	0.999994	-0.0413645	0.666346	0.999996
ENSMUSG00000027079	Clp1	CLP1, cleavage and polyadenylation factor I subunit	0.276951	0.00804682	0.581638	-0.0225989	0.837377	0.999999	0.195161	0.208397	0.999994	-0.104388	0.335929	0.999996
ENSMUSG00000028719	Cmpk1	cytidine monophosphate (UMP-CMP) kinase 1	-0.0610999	0.562317	0.999996	-0.393168	0.000389071	0.0762101	0.0499034	0.775631	0.999994	-0.282165	0.0123743	0.833056
ENSMUSG00000020638	Cmpk2	cytidine monophosphate (UMP-CMP) kinase 2, mitochondrial	0.274116	0.00148277	0.581546	0.666844	2.11207e-08	3.54932e-06	-0.0280434	0.850219	0.999994	0.364685	0.000238044	0.197207
ENSMUSG00000010095	Slc3a2	solute carrier family 3 (activators of dibasic and neutral amino acid transport), member 2	0.568577	5.48811e-06	0.00116844	1.02656	6.49452e-10	1.5659e-08	0.130448	0.375246	0.999994	0.588433	2.01301e-05	0.00292311
ENSMUSG00000032312	Csk	c-src tyrosine kinase	-0.320174	0.000917421	0.316952	-0.251495	0.00487825	0.669531	-0.0560367	0.70136	0.999994	0.012643	0.910242	0.999996
ENSMUSG00000024576	Csnk1a1	casein kinase 1, alpha 1	0.16024	0.0145789	0.999996	0.132196	0.0359009	0.999999	0.0147747	0.902742	0.999994	-0.013269	0.867416	0.999996
ENSMUSG00000025162	Csnk1d	casein kinase 1, delta	-0.131729	0.0526195	0.999996	-0.0268218	0.708902	0.999999	-0.0316192	0.7911	0.999994	0.0732883	0.32252	0.999996
ENSMUSG00000022433	Csnk1e	casein kinase 1, epsilon	-0.0597011	0.397285	0.999996	0.1075	0.110348	0.999999	0.0382562	0.749688	0.999994	0.205457	0.0080135	0.999996
ENSMUSG00000032384	Csnk1g1	casein kinase 1, gamma 1	-0.258159	0.0107233	0.691342	0.016088	0.883063	0.999999	-0.218647	0.157731	0.999994	0.0556005	0.629163	0.999996
ENSMUSG00000003345	Csnk1g2	casein kinase 1, gamma 2	-0.144455	0.0663373	0.999996	-0.0733838	0.347379	0.999999	-0.0739429	0.556446	0.999994	-0.00287182	0.977566	0.999996
ENSMUSG00000073563	Csnk1g3	casein kinase 1, gamma 3	-0.158234	0.0795458	0.999996	-0.201052	0.024656	0.957672	0.00651589	0.969162	0.999994	-0.0363025	0.739569	0.999996
ENSMUSG00000074698	Csnk2a1	casein kinase 2, alpha 1 polypeptide	-0.14988	0.0234568	0.999996	-0.152841	0.0184269	0.999999	-0.0177873	0.883384	0.999994	-0.0207485	0.795095	0.999996
ENSMUSG00000046707	Csnk2a2	casein kinase 2, alpha prime polypeptide	0.0868835	0.238199	0.999996	0.239424	0.00185347	0.775982	-0.0192059	0.888549	0.999994	0.133335	0.0906252	0.999996
ENSMUSG00000024387	Csnk2b	casein kinase 2, beta polypeptide	0.081042	0.275563	0.999996	-0.239115	0.00205615	0.77624	0.0360468	0.779701	0.999994	-0.28411	0.00128762	0.763629
ENSMUSG00000048216	Gpr85	G protein-coupled receptor 85	1.2701	2.85177e-05	0.000252276	1.72627	2.8114e-07	1.35774e-06	-0.128887	0.79105	0.999994	0.327278	0.163764	0.801824
ENSMUSG00000034974	Dapk3	death-associated protein kinase 3	0.0248306	0.830102	0.999996	0.0313797	0.780285	0.999999	0.0179167	0.931203	0.999994	0.0244659	0.849146	0.999996
ENSMUSG00000020935	Dcakd	dephospho-CoA kinase domain containing	0.00700913	0.949542	0.999996	-0.0690521	0.468641	0.999999	0.0646804	0.683715	0.999994	-0.0113809	0.924965	0.999996
ENSMUSG00000029366	Dck	deoxycytidine kinase	-0.252762	0.0132987	0.72256	-0.843674	2.40926e-08	8.77049e-07	0.106609	0.490077	0.999994	-0.484303	0.000195536	0.0382642
ENSMUSG00000028078	Dclk2	doublecortin-like kinase 2	0.0515825	0.737911	0.999996	0.846417	2.22543e-06	4.98894e-05	-0.252888	0.255982	0.999994	0.541946	0.00100272	0.0533554
ENSMUSG00000032500	Dclk3	doublecortin-like kinase 3	-0.303482	0.0108234	0.466396	-0.131898	0.239647	0.999999	-0.0423293	0.840696	0.999994	0.129255	0.305542	0.999996
ENSMUSG00000003534	Ddr1	discoidin domain receptor family, member 1	-0.350676	0.0260163	0.356139	0.0591703	0.711152	0.999999	-0.065907	0.807957	0.999994	0.34394	0.0403681	0.602346
ENSMUSG00000020142	Slc1a4	solute carrier family 1 (glutamate/neutral amino acid transporter), member 4	0.696897	4.38309e-06	0.000285318	1.15089	1.60184e-09	2.38581e-08	-0.0226627	0.921199	0.999994	0.431334	0.00105943	0.134975
ENSMUSG00000025357	Dgka	diacylglycerol kinase, alpha	-0.107045	0.377647	0.999996	0.609268	1.39548e-05	0.00107893	-0.120284	0.526919	0.999994	0.596029	0.000110708	0.00958687
ENSMUSG00000070738	Dgkd	diacylglycerol kinase, delta	0.21092	0.00168571	0.999996	0.518325	2.4725e-08	4.79838e-05	-0.0243421	0.831272	0.999994	0.283063	0.000277472	0.737122
ENSMUSG00000000276	Dgke	diacylglycerol kinase, epsilon	-0.0704456	0.519788	0.999996	-0.0229787	0.843087	0.999999	0.0523722	0.774381	0.999994	0.0998391	0.389501	0.999996
ENSMUSG00000034731	Dgkh	diacylglycerol kinase, eta	-0.27654	0.0206934	0.594208	-0.196398	0.0900036	0.902718	-0.234426	0.1964	0.999994	-0.154285	0.229687	0.999996
ENSMUSG00000004815	Dgkq	diacylglycerol kinase, theta	0.0995706	0.410323	0.999996	0.400498	0.00121699	0.0954694	-0.000428682	0.998339	0.999994	0.300499	0.0187532	0.739095
ENSMUSG00000040479	Dgkz	diacylglycerol kinase zeta	-0.0456634	0.642497	0.999996	0.152	0.0900036	0.999999	-0.00797222	0.96433	0.999994	0.189691	0.0555106	0.999996
ENSMUSG00000014554	Dguok	deoxyguanosine kinase	0.375943	6.8245e-05	0.0806458	-0.00310103	0.972952	0.999999	0.145939	0.232004	0.999994	-0.233105	0.0075791	0.999996
ENSMUSG00000022770	Dlg1	discs large MAGUK scaffold protein 1	-0.171658	0.018292	0.999996	-0.0752646	0.284385	0.999999	-0.0613421	0.593232	0.999994	0.0350513	0.677282	0.999996
ENSMUSG00000000881	Dlg3	discs large MAGUK scaffold protein 3	0.0184109	0.843979	0.999996	0.260028	0.00254662	0.612486	-0.0441358	0.761705	0.999994	0.197481	0.0283544	0.999996
ENSMUSG00000020886	Dlg4	discs large MAGUK scaffold protein 4	0.121862	0.127941	0.999996	0.428668	9.75262e-06	0.0113588	-0.030361	0.839374	0.999994	0.276445	0.00254979	0.844641
ENSMUSG00000021782	Dlg5	discs large MAGUK scaffold protein 5	-0.341077	0.0031889	0.287685	-0.210435	0.0479616	0.865734	-0.0751836	0.675786	0.999994	0.0554586	0.664658	0.999996
ENSMUSG00000030409	Dmpk	dystrophia myotonica-protein kinase	-0.606348	0.0208098	0.121639	-0.964655	0.000762391	0.00479715	-0.119934	0.783795	0.999994	-0.478242	0.106089	0.519173
ENSMUSG00000075419	Dolk	dolichol kinase	-0.0988183	0.315698	0.999996	0.0385727	0.704277	0.999999	0.0699636	0.664154	0.999994	0.207355	0.0472595	0.999996
ENSMUSG00000042046	Dstyk	dual serine/threonine and tyrosine protein kinase	0.0798409	0.393128	0.999996	0.332683	0.000656285	0.206338	0.018416	0.917031	0.999994	0.271258	0.00755394	0.890882
ENSMUSG00000026281	Dtymk	deoxythymidylate kinase	0.237745	0.013824	0.810833	-0.0402008	0.685542	0.999999	0.0217239	0.902962	0.999994	-0.256222	0.0135283	0.999996
ENSMUSG00000022897	Dyrk1a	dual-specificity tyrosine-(Y)-phosphorylation regulated kinase 1a	-0.149574	0.106891	0.999996	0.0315555	0.751974	0.999999	-0.113068	0.430908	0.999994	0.0680611	0.518586	0.999996
ENSMUSG00000002409	Dyrk1b	dual-specificity tyrosine-(Y)-phosphorylation regulated kinase 1b	-0.0198857	0.910698	0.999996	0.140466	0.350904	0.999999	0.0323441	0.912154	0.999994	0.192696	0.242409	0.999996
ENSMUSG00000028630	Dyrk2	dual-specificity tyrosine-(Y)-phosphorylation regulated kinase 2	-0.26227	0.00967801	0.665427	-0.229182	0.0188155	0.788455	-0.0838055	0.592592	0.999994	-0.0507174	0.661912	0.999996
ENSMUSG00000016526	Dyrk3	dual-specificity tyrosine-(Y)-phosphorylation regulated kinase 3	0.235758	0.0139528	0.824607	0.23979	0.00923401	0.739492	0.194024	0.180211	0.999994	0.198056	0.044075	0.999996
ENSMUSG00000035064	Eef2k	eukaryotic elongation factor-2 kinase	0.071902	0.445927	0.999996	0.472872	1.30508e-05	0.00597387	0.0145322	0.937522	0.999994	0.415503	0.000254164	0.0988389
ENSMUSG00000020122	Egfr	epidermal growth factor receptor	-0.132038	0.179028	0.999996	0.204356	0.0353728	0.916602	-0.138496	0.362883	0.999994	0.197898	0.0622137	0.999996
ENSMUSG00000029613	Eif2ak1	eukaryotic translation initiation factor 2 alpha kinase 1	-0.122253	0.113295	0.999996	0.0790633	0.296813	0.999999	0.0613829	0.627289	0.999994	0.262699	0.00312463	0.953231
ENSMUSG00000024079	Eif2ak2	eukaryotic translation initiation factor 2-alpha kinase 2	-0.19495	0.0240225	0.999996	-0.195231	0.0214131	0.999999	-0.131323	0.318746	0.999994	-0.131604	0.153108	0.999996
ENSMUSG00000030966	Trim21	tripartite motif-containing 21	0.454806	2.81322e-05	0.0147147	0.908777	7.82356e-10	2.71792e-08	0.0332783	0.840696	0.999994	0.48725	3.41559e-05	0.0141116
ENSMUSG00000005102	Eif2ak4	eukaryotic translation initiation factor 2 alpha kinase 4	0.072449	0.39171	0.999996	0.347378	0.000158565	0.128119	-0.0228035	0.883573	0.999994	0.252125	0.00631382	0.999996
ENSMUSG00000029859	Epha1	Eph receptor A1	-0.0350113	0.723279	0.999996	0.287241	0.00231113	0.436091	-0.0616732	0.687436	0.999994	0.260579	0.00971467	0.96821
ENSMUSG00000006445	Epha2	Eph receptor A2	-0.295307	0.00103621	0.442631	-0.0600039	0.464317	0.999999	-0.0865513	0.50098	0.999994	0.148752	0.0912871	0.999996
ENSMUSG00000047230	Cldn2	claudin 2	-1.93856	4.37588e-06	2.19516e-05	-1.48678	2.29522e-05	0.00011188	0.0919394	0.851779	0.999994	0.543728	0.131459	0.553288
ENSMUSG00000028289	Epha7	Eph receptor A7	-0.573488	0.0280069	0.152335	-0.42006	0.0901244	0.310217	-0.0303946	0.952829	0.999994	0.123033	0.693469	0.999996
ENSMUSG00000021379	Id4	inhibitor of DNA binding 4	-1.15418	0.000105867	0.000937859	-2.57955	1.57688e-08	5.02218e-08	-0.333979	0.362883	0.999994	-1.75935	4.92331e-05	0.000399576
ENSMUSG00000020788	Atp2a3	ATPase, Ca++ transporting, ubiquitous	0.561904	0.00288703	0.0491291	1.00954	2.95953e-06	4.00304e-05	0.0749339	0.822057	0.999994	0.522575	0.00519052	0.127503
ENSMUSG00000029710	Ephb4	Eph receptor B4	-0.362595	0.000563742	0.165416	-0.122551	0.179136	0.999999	-0.0804726	0.592409	0.999994	0.159572	0.11385	0.999996
ENSMUSG00000029869	Ephb6	Eph receptor B6	0.0269514	0.95734	0.999996	0.575808	0.174059	0.399059	-0.230964	0.76633	0.999994	0.317892	0.505949	0.999996
ENSMUSG00000062312	Erbb2	erb-b2 receptor tyrosine kinase 2	-0.58519	6.83131e-06	0.00112444	-0.389257	0.000362166	0.0792364	-0.133106	0.383061	0.999994	0.0628271	0.589709	0.999996
ENSMUSG00000018166	Erbb3	erb-b2 receptor tyrosine kinase 3	-0.471085	9.18276e-06	0.00646915	-0.21562	0.00953853	0.907259	-0.228197	0.0933514	0.999994	0.0272685	0.787182	0.999996
ENSMUSG00000016984	Etaa1	Ewing tumor-associated antigen 1	-0.00462927	0.960483	0.999996	-0.074964	0.351477	0.999999	0.0482672	0.728182	0.999994	-0.0220676	0.827468	0.999996
ENSMUSG00000030275	Etnk1	ethanolamine kinase 1	-0.443294	3.46601e-05	0.0193871	-0.237936	0.00723584	0.757184	-0.225537	0.112615	0.999994	-0.0201786	0.853149	0.999996
ENSMUSG00000070644	Etnk2	ethanolamine kinase 2	0.235956	0.138386	0.767694	1.29257	2.48871e-08	2.51299e-07	-0.172331	0.50933	0.999994	0.884283	2.88668e-05	0.000745685
ENSMUSG00000033557	Fam20b	family with sequence similarity 20, member B	-0.270198	0.00130326	0.605818	-0.0404599	0.609988	0.999999	-0.0740907	0.544189	0.999994	0.155648	0.0606132	0.999996
ENSMUSG00000062866	Phactr2	phosphatase and actin regulator 2	0.537082	0.000114514	0.0105235	0.975112	2.73398e-08	5.98679e-07	-0.152511	0.420537	0.999994	0.285519	0.0200451	0.823375
ENSMUSG00000028959	Fastk	Fas-activated serine/threonine kinase	0.183062	0.0216898	0.999996	0.350745	8.29367e-05	0.106135	0.0020789	0.988519	0.999994	0.169762	0.0431874	0.999996
ENSMUSG00000027086	Fastkd1	FAST kinase domains 1	0.168111	0.242522	0.999996	0.452619	0.00203692	0.0662054	0.0230068	0.937011	0.999994	0.307514	0.0411476	0.741048
ENSMUSG00000025962	Fastkd2	FAST kinase domains 2	0.31243	0.000778812	0.345834	0.220228	0.00866454	0.878572	0.145677	0.260633	0.999994	0.0534749	0.572656	0.999996
ENSMUSG00000021532	Fastkd3	FAST kinase domains 3	-0.0891416	0.394861	0.999996	-0.176481	0.0791984	0.999999	0.00733198	0.969551	0.999994	-0.0800073	0.490803	0.999996
ENSMUSG00000079043	Fastkd5	FAST kinase domains 5	-0.0259645	0.838854	0.999996	-0.0979602	0.384259	0.999999	0.131315	0.45727	0.999994	0.0593189	0.657487	0.999996
ENSMUSG00000000127	Fer	fer (fms/fps related) protein kinase	0.0984969	0.248861	0.999996	0.0315197	0.725669	0.999999	0.117171	0.373717	0.999994	0.0501941	0.608579	0.999996
ENSMUSG00000053158	Fes	feline sarcoma oncogene	-0.125793	0.190573	0.999996	0.09365	0.325035	0.999999	-0.126192	0.398142	0.999994	0.0932514	0.378083	0.999996
ENSMUSG00000031565	Fgfr1	fibroblast growth factor receptor 1	-0.129093	0.358419	0.999996	-0.129624	0.347265	0.999999	-0.0552893	0.828625	0.999994	-0.0558202	0.739569	0.999996
ENSMUSG00000030849	Fgfr2	fibroblast growth factor receptor 2	-0.620226	0.0302546	0.149694	-0.889842	0.00343493	0.0160645	0.099367	0.836444	0.999994	-0.170249	0.595943	0.999996
ENSMUSG00000038368	Focad	focadhesin	0.478753	0.000426697	0.0374031	0.913806	8.18659e-08	1.93671e-06	-0.0770815	0.714194	0.999994	0.357971	0.00574444	0.41612
ENSMUSG00000028573	Fggy	FGGY carbohydrate kinase domain containing	0.311863	0.0275934	0.468344	0.0187907	0.90528	0.999999	0.137831	0.539377	0.999994	-0.155242	0.301071	0.999996
ENSMUSG00000075012	Fjx1	four jointed box 1	0.454676	0.215173	0.546211	0.59077	0.0974196	0.264616	-0.053691	0.945761	0.999994	0.0824034	0.848473	0.999996
ENSMUSG00000029648	Flt1	FMS-like tyrosine kinase 1	-0.326588	0.00820588	0.372641	-0.389006	0.00230601	0.12796	-0.315951	0.108355	0.999994	-0.378369	0.00626182	0.355095
ENSMUSG00000020357	Flt4	FMS-like tyrosine kinase 4	-0.460006	0.000406701	0.0451402	-0.337745	0.00455701	0.255052	-0.246181	0.167148	0.999994	-0.123919	0.334601	0.999996
ENSMUSG00000025175	Fn3k	fructosamine 3 kinase	0.303915	0.170886	0.600811	0.496719	0.0214324	0.127298	0.0877649	0.833112	0.999994	0.280569	0.225688	0.945704
ENSMUSG00000019779	Frk	fyn-related kinase	-0.32166	0.00136641	0.32398	-0.348743	0.000479916	0.153445	-0.0196064	0.910806	0.999994	-0.0466894	0.668575	0.999996
ENSMUSG00000019843	Fyn	Fyn proto-oncogene	0.28828	0.000384479	0.464888	0.51412	2.04235e-07	0.000236175	-0.0134561	0.924058	0.999994	0.212384	0.00730794	0.999996
ENSMUSG00000062234	Gak	cyclin G associated kinase	-0.0160171	0.819066	0.999996	0.208247	0.00166403	0.999999	-0.00870977	0.946403	0.999994	0.215555	0.00304062	0.999996
ENSMUSG00000020766	Galk1	galactokinase 1	0.331035	0.000466692	0.24938	-0.00501018	0.958816	0.999999	0.235532	0.0924424	0.999994	-0.100513	0.268356	0.999996
ENSMUSG00000027207	Galk2	galactokinase 2	0.0457856	0.572801	0.999996	-0.127481	0.0889269	0.999999	0.194276	0.121592	0.999994	0.0210086	0.82694	0.999996
ENSMUSG00000041798	Gck	glucokinase	0.0786878	0.782042	0.999996	-0.928565	0.000933675	0.00583101	0.390881	0.321294	0.999994	-0.616371	0.0340872	0.234332
ENSMUSG00000025059	Gk	glycerol kinase	-0.0679997	0.568879	0.999996	-0.0417897	0.726759	0.999999	0.148743	0.396507	0.999994	0.174952	0.151287	0.999996
ENSMUSG00000041440	Gk5	glycerol kinase 5 (putative)	-0.109666	0.536578	0.999996	0.226631	0.167581	0.733265	-0.0952437	0.7476	0.999994	0.241054	0.182445	0.999996
ENSMUSG00000020258	Glyctk	glycerate kinase	-0.0995853	0.779091	0.999996	0.462196	0.116075	0.327082	0.149664	0.788408	0.999994	0.711445	0.0333769	0.209296
ENSMUSG00000028479	Gne	glucosamine (UDP-N-acetyl)-2-epimerase/N-acetylmannosamine kinase	0.238802	0.0383622	0.781631	0.934089	2.33467e-08	5.68837e-07	-0.0347246	0.874867	0.999994	0.660562	2.37239e-05	0.00188652
ENSMUSG00000024858	Grk2	G protein-coupled receptor kinase 2	-0.0418828	0.578915	0.999996	0.108869	0.120957	0.999999	0.00320973	0.980838	0.999994	0.153962	0.0472798	0.999996
ENSMUSG00000052783	Grk4	G protein-coupled receptor kinase 4	-0.332572	0.123759	0.514978	0.11598	0.604382	0.999999	-0.271825	0.412686	0.999994	0.176726	0.46739	0.999996
ENSMUSG00000029811	Aoc1	amine oxidase, copper-containing 1	-1.92639	6.46686e-08	2.46412e-07	-1.49225	3.87439e-07	1.91802e-06	-0.177974	0.529091	0.999994	0.256171	0.267245	0.999996
ENSMUSG00000074886	Grk6	G protein-coupled receptor kinase 6	-0.0922948	0.27349	0.999996	0.0062636	0.948156	0.999999	0.0114894	0.946789	0.999994	0.110048	0.224077	0.999996
ENSMUSG00000057177	Gsk3a	glycogen synthase kinase 3 alpha	-0.174801	0.035358	0.999996	0.0460505	0.58453	0.999999	-0.0170273	0.91384	0.999994	0.203824	0.0232944	0.999996
ENSMUSG00000022812	Gsk3b	glycogen synthase kinase 3 beta	-0.123429	0.28375	0.999996	-0.0566909	0.634131	0.999999	-0.149094	0.400843	0.999994	-0.0823557	0.527057	0.999996
ENSMUSG00000020444	Guk1	guanylate kinase 1	0.465636	0.000329691	0.0380381	0.0849571	0.457855	0.999999	0.0480043	0.818109	0.999994	-0.332675	0.00845813	0.543272
ENSMUSG00000050107	Haspin	histone H3 associated protein kinase	-0.308334	0.00562248	0.42498	-0.324391	0.00302698	0.282363	-0.00728395	0.970243	0.999994	-0.0233405	0.861609	0.999996
ENSMUSG00000008730	Hipk1	homeodomain interacting protein kinase 1	-0.345904	0.000898371	0.225067	-0.149101	0.105773	0.999999	-0.185545	0.201815	0.999994	0.0112577	0.925515	0.999996
ENSMUSG00000061436	Hipk2	homeodomain interacting protein kinase 2	-0.21639	0.0132211	0.954828	-0.0623695	0.463849	0.999999	-0.0991506	0.449336	0.999994	0.0548701	0.575063	0.999996
ENSMUSG00000027177	Hipk3	homeodomain interacting protein kinase 3	-0.327588	0.012653	0.382609	-0.154905	0.210964	0.999999	-0.136333	0.490143	0.999994	0.03635	0.816217	0.999996
ENSMUSG00000073490	Ifi207	interferon activated gene 207	0.466315	0.000107573	0.0232154	0.898336	9.95117e-09	3.08205e-07	-0.072277	0.678076	0.999994	0.359744	0.00179309	0.331907
ENSMUSG00000000628	Hk2	hexokinase 2	-0.296317	0.00621465	0.481773	-0.355372	0.00123686	0.166162	-0.134098	0.400843	0.999994	-0.193153	0.0837504	0.999996
ENSMUSG00000024610	Cd74	CD74 antigen (invariant polypeptide of major histocompatibility complex, class II antigen-associated)	1.09769	9.30177e-06	0.000126522	1.5274	1.93844e-08	1.29293e-07	0.366478	0.238864	0.999994	0.796184	0.000236438	0.00580342
ENSMUSG00000035878	Hykk	hydroxylysine kinase 1	-0.441385	0.186087	0.503804	-0.665174	0.0331883	0.11702	0.429936	0.375121	0.999994	0.206147	0.59814	0.999996
ENSMUSG00000035941	Ibtk	inhibitor of Bruton agammaglobulinemia tyrosine kinase	0.131515	0.149455	0.999996	0.199777	0.0276435	0.958832	-0.0969019	0.506805	0.999994	-0.0286395	0.797587	0.999996
ENSMUSG00000050002	Idnk	idnK gluconokinase homolog (E. coli)	0.252355	0.0635469	0.711131	0.167849	0.214129	0.965519	-0.130566	0.557021	0.999994	-0.215072	0.137794	0.999996
ENSMUSG00000005533	Igf1r	insulin-like growth factor I receptor	-0.259165	0.0155214	0.682997	-0.396229	0.000527387	0.0793265	-0.179565	0.262655	0.999994	-0.316629	0.00757069	0.613157
ENSMUSG00000031537	Ikbkb	inhibitor of kappaB kinase beta	-0.232677	0.000880062	0.923043	-0.161599	0.010933	0.999999	-0.0408302	0.700727	0.999994	0.0302475	0.686427	0.999996
ENSMUSG00000042349	Ikbke	inhibitor of kappaB kinase epsilon	-0.425078	1.06566e-05	0.0159389	-0.110905	0.127194	0.999999	-0.0743662	0.527888	0.999994	0.239806	0.00521295	0.999996
ENSMUSG00000004221	Ikbkg	inhibitor of kappaB kinase gamma	-0.365588	8.41623e-05	0.103537	0.0588675	0.444722	0.999999	-0.0317702	0.821479	0.999994	0.392685	0.000124147	0.105809
ENSMUSG00000030890	Ilk	integrin linked kinase	-0.283143	0.000608719	0.506349	-0.714262	3.3193e-09	4.03987e-07	0.173359	0.139078	0.999994	-0.25776	0.00282989	0.999996
ENSMUSG00000005534	Insr	insulin receptor	-0.00965477	0.932491	0.999996	0.414708	0.000178197	0.0435366	-0.245042	0.128789	0.999994	0.179321	0.0899706	0.999996
ENSMUSG00000032594	Ip6k1	inositol hexaphosphate kinase 1	0.0407374	0.708676	0.999996	0.394359	0.000333619	0.0715164	0.0818451	0.620669	0.999994	0.435467	0.000465871	0.0960853
ENSMUSG00000032599	Ip6k2	inositol hexaphosphate kinase 2	0.0226593	0.805589	0.999996	0.0663356	0.420721	0.999999	0.0861353	0.51357	0.999994	0.129812	0.143499	0.999996
ENSMUSG00000060733	Ipmk	inositol polyphosphate multikinase	-0.291946	0.000277492	0.433333	-0.0853701	0.211893	0.999999	-0.0819866	0.44826	0.999994	0.124589	0.0987236	0.999996
ENSMUSG00000021385	Ippk	inositol 1,3,4,5,6-pentakisphosphate 2-kinase	-0.148289	0.163998	0.999996	-0.0725713	0.494065	0.999999	0.0719371	0.683661	0.999994	0.147655	0.197447	0.999996
ENSMUSG00000031392	Irak1	interleukin-1 receptor-associated kinase 1	0.084027	0.168374	0.999996	0.229365	0.000522229	0.896555	-0.0196682	0.865591	0.999994	0.12567	0.0556914	0.999996
ENSMUSG00000060477	Irak2	interleukin-1 receptor-associated kinase 2	-0.22862	0.0515631	0.827209	-0.1305	0.244518	0.999999	0.127069	0.479428	0.999994	0.225189	0.0724572	0.999996
ENSMUSG00000020227	Irak3	interleukin-1 receptor-associated kinase 3	0.22744	0.443026	0.89212	0.224847	0.451786	0.842827	-0.226069	0.64763	0.999994	-0.228661	0.47777	0.999996
ENSMUSG00000059883	Irak4	interleukin-1 receptor-associated kinase 4	-0.0205709	0.859333	0.999996	0.0551234	0.60483	0.999999	0.031885	0.871711	0.999994	0.107579	0.34265	0.999996
ENSMUSG00000057963	Itpk1	inositol 1,3,4-triphosphate 5/6 kinase	-0.338169	0.000555275	0.231736	-0.48505	6.48069e-06	0.00334196	0.090284	0.507016	0.999994	-0.0565975	0.577041	0.999996
ENSMUSG00000027296	Itpka	inositol 1,4,5-trisphosphate 3-kinase A	0.201572	0.144261	0.912692	0.789682	4.04689e-06	0.000107411	-0.177771	0.415286	0.999994	0.410339	0.00626342	0.272666
ENSMUSG00000038855	Itpkb	inositol 1,4,5-trisphosphate 3-kinase B	-0.0364456	0.751234	0.999996	0.808899	7.18566e-08	2.87125e-06	-0.220404	0.181287	0.999994	0.624941	2.37239e-05	0.00241112
ENSMUSG00000003752	Itpkc	inositol 1,4,5-trisphosphate 3-kinase C	-0.301904	0.0177672	0.487608	0.193523	0.103683	0.907259	-0.0816807	0.693345	0.999994	0.413747	0.00349411	0.228289
ENSMUSG00000028530	Jak1	Janus kinase 1	-0.0974298	0.152513	0.999996	0.103288	0.120179	0.999999	0.0208188	0.8725	0.999994	0.221536	0.0043986	0.999996
ENSMUSG00000024789	Jak2	Janus kinase 2	-0.334287	0.000133319	0.19798	-0.396209	1.17533e-05	0.0239249	-0.0340236	0.795519	0.999994	-0.0959449	0.237663	0.999996
ENSMUSG00000031805	Jak3	Janus kinase 3	-0.295721	0.0016614	0.451512	-0.181921	0.0331582	0.999999	-0.085203	0.534389	0.999994	0.028597	0.787432	0.999996
ENSMUSG00000061751	Kalrn	kalirin, RhoGEF kinase	0.0106739	0.956194	0.999996	0.337126	0.0388333	0.349818	-0.0438148	0.889071	0.999994	0.282637	0.110998	0.884194
ENSMUSG00000062960	Kdr	kinase insert domain protein receptor	0.0317561	0.933104	0.999996	-0.442684	0.159673	0.403373	0.33048	0.517658	0.999994	-0.143959	0.716332	0.999996
ENSMUSG00000029162	Khk	ketohexokinase	0.172376	0.155632	0.999996	0.0344315	0.791539	0.999999	0.156293	0.406028	0.999994	0.0183488	0.904261	0.999996
ENSMUSG00000025854	Fam20c	family with sequence similarity 20, member C	-1.20813	5.91089e-09	7.33516e-08	-0.787575	7.46534e-07	2.70526e-05	-0.271795	0.140177	0.999994	0.148756	0.27467	0.999996
ENSMUSG00000040021	Lats1	large tumor suppressor	-0.115063	0.281874	0.999996	0.123893	0.235533	0.999999	-0.158277	0.336157	0.999994	0.0806783	0.500794	0.999996
ENSMUSG00000021959	Lats2	large tumor suppressor 2	-0.167767	0.0568353	0.999996	-0.0750604	0.39164	0.999999	-0.0959956	0.484639	0.999994	-0.00328898	0.977206	0.999996
ENSMUSG00000025887	Casp12	caspase 12	0.629848	0.00102374	0.0185106	1.0474	2.33015e-06	3.11855e-05	-0.170812	0.560421	0.999994	0.246735	0.163045	0.999996
ENSMUSG00000040488	Ltbp4	latent transforming growth factor beta binding protein 4	1.49667	1.12342e-07	8.44768e-07	1.9116	8.82005e-10	4.33195e-09	0.00161795	0.996803	0.999994	0.416553	0.0196792	0.358152
ENSMUSG00000020451	Limk2	LIM motif-containing protein kinase 2	-0.0229831	0.76491	0.999996	0.321477	6.47564e-05	0.183603	0.00772927	0.95592	0.999994	0.352189	0.000129374	0.209296
ENSMUSG00000038970	Lmtk2	lemur tyrosine kinase 2	-0.337867	0.00101347	0.252487	-0.256723	0.00687556	0.632238	-0.16092	0.260332	0.999994	-0.0797762	0.444976	0.999996
ENSMUSG00000062044	Lmtk3	lemur tyrosine kinase 3	-0.0733133	0.689877	0.999996	0.0971484	0.585599	0.999999	-0.230026	0.390549	0.999994	-0.0595641	0.773811	0.999996
ENSMUSG00000056215	Lrguk	leucine-rich repeats and guanylate kinase domain containing	0.0175855	0.951582	0.999996	0.166046	0.516195	0.944104	-0.198013	0.63501	0.999994	-0.0495524	0.873289	0.999996
ENSMUSG00000015133	Lrrk1	leucine-rich repeat kinase 1	-0.257764	0.0014285	0.703405	-0.0228997	0.774744	0.999999	-0.13728	0.228718	0.999994	0.0975844	0.22418	0.999996
ENSMUSG00000027297	Ltk	leukocyte tyrosine kinase	0.275931	0.0153166	0.593479	0.756609	2.88348e-07	1.43915e-05	0.209783	0.222388	0.999994	0.690461	1.27639e-05	0.000876483
ENSMUSG00000042228	Lyn	LYN proto-oncogene, Src family tyrosine kinase	-0.0174666	0.877104	0.999996	-0.0789112	0.436234	0.999999	-0.0911985	0.57123	0.999994	-0.152643	0.159448	0.999996
ENSMUSG00000045095	Magi1	membrane associated guanylate kinase, WW and PDZ domain containing 1	-0.22768	0.0085651	0.895616	-0.10318	0.207623	0.999999	-0.14858	0.24505	0.999994	-0.0240805	0.816488	0.999996
ENSMUSG00000040003	Magi2	membrane associated guanylate kinase, WW and PDZ domain containing 2	0.332972	0.188786	0.577944	0.387765	0.109422	0.364797	0.125879	0.778697	0.999994	0.180673	0.51364	0.999996
ENSMUSG00000053641	Dennd4a	DENN/MADD domain containing 4A	0.77433	1.71147e-07	9.26048e-06	1.18504	1.18044e-10	1.61734e-09	-0.0957868	0.558095	0.999994	0.314923	0.00353042	0.58466
ENSMUSG00000021363	Mak	male germ cell-associated kinase	0.687308	0.0108136	0.068945	1.27433	2.06611e-05	0.000136852	0.0172999	0.973102	0.999994	0.604323	0.0210831	0.184305
ENSMUSG00000004936	Map2k1	mitogen-activated protein kinase kinase 1	0.121295	0.0304128	0.999996	0.0783712	0.145846	0.999999	0.134875	0.131189	0.999994	0.0919509	0.120404	0.999996
ENSMUSG00000035027	Map2k2	mitogen-activated protein kinase kinase 2	0.114751	0.172406	0.999996	0.220581	0.0095911	0.873428	-0.121508	0.353344	0.999994	-0.0156784	0.882355	0.999996
ENSMUSG00000018932	Map2k3	mitogen-activated protein kinase kinase 3	-0.20802	0.00895177	0.999996	-0.132203	0.0766223	0.999999	-0.0242396	0.866742	0.999994	0.0515767	0.557714	0.999996
ENSMUSG00000033352	Map2k4	mitogen-activated protein kinase kinase 4	-0.11427	0.097219	0.999996	-0.173087	0.0124705	0.999999	-0.0113683	0.934402	0.999994	-0.0701855	0.356505	0.999996
ENSMUSG00000058444	Map2k5	mitogen-activated protein kinase kinase 5	-0.0518365	0.634937	0.999996	-0.0230117	0.839775	0.999999	-0.036189	0.849795	0.999994	-0.00736413	0.955727	0.999996
ENSMUSG00000020623	Map2k6	mitogen-activated protein kinase kinase 6	0.962131	0.000591548	0.00537153	0.655271	0.00986812	0.051226	0.017996	0.97113	0.999994	-0.288864	0.263555	0.954079
ENSMUSG00000002948	Map2k7	mitogen-activated protein kinase kinase 7	-0.0320282	0.772359	0.999996	0.252346	0.0124435	0.654259	-0.0301927	0.874867	0.999994	0.254181	0.0212143	0.999996
ENSMUSG00000021754	Map3k1	mitogen-activated protein kinase kinase kinase 1	-0.519757	0.00486973	0.071907	-0.48349	0.00649787	0.0759632	-0.12934	0.635236	0.999994	-0.0930722	0.637475	0.999996
ENSMUSG00000040390	Map3k10	mitogen-activated protein kinase kinase kinase 10	-0.0776946	0.51209	0.999996	0.322624	0.00539191	0.307654	-0.143675	0.416029	0.999994	0.256643	0.0363734	0.991323
ENSMUSG00000004054	Map3k11	mitogen-activated protein kinase kinase kinase 11	-0.463773	5.83771e-05	0.0178441	-0.108681	0.244072	0.999999	-0.138383	0.344259	0.999994	0.216709	0.0369228	0.999996
ENSMUSG00000023050	Map3k12	mitogen-activated protein kinase kinase kinase 12	-0.311686	0.00164865	0.373129	-0.184067	0.0369797	0.999999	0.12562	0.364021	0.999994	0.25324	0.0122676	0.999996
ENSMUSG00000033618	Map3k13	mitogen-activated protein kinase kinase kinase 13	-0.465599	0.00279857	0.0892033	-0.0647114	0.675301	0.999999	-0.336791	0.144677	0.999994	0.0640965	0.719236	0.999996
ENSMUSG00000020941	Map3k14	mitogen-activated protein kinase kinase kinase 14	-0.414387	0.000558799	0.0844321	-0.334381	0.00253766	0.244469	-0.0463409	0.805596	0.999994	0.0336653	0.800615	0.999996
ENSMUSG00000024383	Map3k2	mitogen-activated protein kinase kinase kinase 2	-0.280633	0.0178516	0.575633	-0.291243	0.0125839	0.449424	-0.152816	0.392596	0.999994	-0.163426	0.191057	0.999996
ENSMUSG00000004085	Map3k20	mitogen-activated protein kinase kinase kinase 20	0.291373	0.00083519	0.461306	0.5315	5.05328e-07	0.000318367	0.0034792	0.981038	0.999994	0.243606	0.00583901	0.999996
ENSMUSG00000043243	Fam129c	family with sequence similarity 129, member C	0.592686	0.000144816	0.00738377	1.00176	1.07613e-07	1.96347e-06	-0.145894	0.510556	0.999994	0.263179	0.0530488	0.951762
ENSMUSG00000020700	Map3k3	mitogen-activated protein kinase kinase kinase 3	-0.100204	0.233801	0.999996	0.103896	0.204013	0.999999	-0.0342289	0.824132	0.999994	0.169872	0.0597418	0.999996
ENSMUSG00000014426	Map3k4	mitogen-activated protein kinase kinase kinase 4	-0.0815035	0.462095	0.999996	0.02114	0.860241	0.999999	-0.0433403	0.827455	0.999994	0.0593032	0.638041	0.999996
ENSMUSG00000079033	Mef2b	myocyte enhancer factor 2B	1.19916	2.7961e-06	3.28583e-05	1.60569	1.54118e-08	9.24e-08	0.0909845	0.820579	0.999994	0.497517	0.0091529	0.182085
ENSMUSG00000028862	Map3k6	mitogen-activated protein kinase kinase kinase 6	-0.257786	0.0583896	0.686236	-0.374027	0.00745189	0.193504	-0.1203	0.578087	0.999994	-0.236542	0.113168	0.999996
ENSMUSG00000028284	Map3k7	mitogen-activated protein kinase kinase kinase 7	-0.320612	0.000404236	0.287685	-0.340242	0.000151591	0.144491	-0.0458064	0.737817	0.999994	-0.0654363	0.467345	0.999996
ENSMUSG00000024235	Map3k8	mitogen-activated protein kinase kinase kinase 8	-0.278547	0.285169	0.724715	-0.826856	0.00353596	0.0185274	-0.205714	0.627289	0.999994	-0.754024	0.0135122	0.112886
ENSMUSG00000042724	Map3k9	mitogen-activated protein kinase kinase kinase 9	-0.168027	0.193221	0.999996	0.056822	0.674734	0.999999	-0.0818518	0.707358	0.999994	0.142997	0.310358	0.999996
ENSMUSG00000037337	Map4k1	mitogen-activated protein kinase kinase kinase kinase 1	-0.141041	0.587791	0.999996	0.136423	0.582862	0.999999	0.0273025	0.955196	0.999994	0.304767	0.250181	0.914584
ENSMUSG00000024948	Map4k2	mitogen-activated protein kinase kinase kinase kinase 2	-0.252607	0.00415401	0.733609	-0.0800632	0.329997	0.999999	0.0249501	0.874397	0.999994	0.197494	0.0297415	0.999996
ENSMUSG00000024242	Map4k3	mitogen-activated protein kinase kinase kinase kinase 3	-0.114984	0.236842	0.999996	-0.00716007	0.948667	0.999999	-0.0581971	0.725365	0.999994	0.0496269	0.663706	0.999996
ENSMUSG00000026074	Map4k4	mitogen-activated protein kinase kinase kinase kinase 4	-0.0489135	0.500655	0.999996	0.117605	0.0870644	0.999999	-0.0449247	0.705188	0.999994	0.121593	0.107454	0.999996
ENSMUSG00000034761	Map4k5	mitogen-activated protein kinase kinase kinase kinase 5	-0.101323	0.16633	0.999996	-0.0469265	0.528307	0.999999	0.0457875	0.711554	0.999994	0.100184	0.205531	0.999996
ENSMUSG00000063358	Mapk1	mitogen-activated protein kinase 1	-0.0381701	0.519001	0.999996	-0.0958791	0.0861203	0.999999	0.0781724	0.375194	0.999994	0.0204634	0.766489	0.999996
ENSMUSG00000053137	Mapk11	mitogen-activated protein kinase 11	-0.257865	0.00242549	0.700786	-0.521082	7.57342e-07	0.000510206	0.0451189	0.73821	0.999994	-0.218098	0.0137778	0.999996
ENSMUSG00000022610	Mapk12	mitogen-activated protein kinase 12	0.313099	0.000440751	0.325153	0.320654	0.000207308	0.216468	0.230145	0.0858969	0.999994	0.2377	0.00658626	0.999996
ENSMUSG00000004864	Mapk13	mitogen-activated protein kinase 13	0.115106	0.178684	0.999996	-0.119211	0.154871	0.999999	0.0862765	0.527482	0.999994	-0.148041	0.10803	0.999996
ENSMUSG00000053436	Mapk14	mitogen-activated protein kinase 14	-0.223594	0.00119839	0.9916	-0.110076	0.0741296	0.999999	-0.0981657	0.312956	0.999994	0.0153521	0.844185	0.999996
ENSMUSG00000063704	Mapk15	mitogen-activated protein kinase 15	-0.448513	0.0132366	0.17188	-0.569702	0.00176014	0.0259074	0.119629	0.673761	0.999994	-0.00155988	0.99498	0.999996
ENSMUSG00000063065	Mapk3	mitogen-activated protein kinase 3	-0.159698	0.027877	0.999996	-0.159456	0.0243215	0.999999	0.0933002	0.399195	0.999994	0.0935419	0.22751	0.999996
ENSMUSG00000024558	Mapk4	mitogen-activated protein kinase 4	-0.334973	0.129948	0.518487	-0.145995	0.523635	0.983529	-0.260918	0.447	0.999994	-0.0719395	0.795204	0.999996
ENSMUSG00000042688	Mapk6	mitogen-activated protein kinase 6	-0.161875	0.052975	0.999996	-0.104435	0.199857	0.999999	-0.0239615	0.878427	0.999994	0.0334786	0.739255	0.999996
ENSMUSG00000001034	Mapk7	mitogen-activated protein kinase 7	-0.376023	0.00300419	0.199277	-0.062828	0.604256	0.999999	-0.0506075	0.811317	0.999994	0.262587	0.0411165	0.953231
ENSMUSG00000021936	Mapk8	mitogen-activated protein kinase 8	0.00304943	0.974403	0.999996	-0.163902	0.0474239	0.999999	0.0996119	0.445872	0.999994	-0.0673394	0.476174	0.999996
ENSMUSG00000020366	Mapk9	mitogen-activated protein kinase 9	0.0869016	0.155632	0.999996	0.265488	0.000119418	0.566903	-0.0103349	0.932983	0.999994	0.168252	0.012712	0.999996
ENSMUSG00000016528	Mapkapk2	MAP kinase-activated protein kinase 2	0.000409754	0.995444	0.999996	-0.000589676	0.993791	0.999999	-0.0167592	0.880852	0.999994	-0.0177587	0.808143	0.999996
ENSMUSG00000032577	Mapkapk3	mitogen-activated protein kinase-activated protein kinase 3	0.153741	0.285267	0.999996	0.862185	1.50185e-06	3.31612e-05	-0.0560101	0.834489	0.999994	0.652434	0.000197361	0.0097574
ENSMUSG00000029454	Mapkapk5	MAP kinase-activated protein kinase 5	0.229331	0.00163355	0.932804	0.121716	0.0628611	0.999999	0.116144	0.260755	0.999994	0.00852881	0.920896	0.999996
ENSMUSG00000026620	Mark1	MAP/microtubule affinity regulating kinase 1	0.194884	0.587094	0.999996	0.777089	0.0171546	0.0662924	-0.0287699	0.966315	0.999994	0.553435	0.10787	0.482481
ENSMUSG00000024969	Mark2	MAP/microtubule affinity regulating kinase 2	-0.27094	0.00134463	0.601875	-0.19396	0.0125391	0.999999	-0.122424	0.306182	0.999994	-0.0454445	0.61612	0.999996
ENSMUSG00000007411	Mark3	MAP/microtubule affinity regulating kinase 3	-0.0149211	0.826165	0.999996	0.0608236	0.315325	0.999999	-0.0567595	0.562128	0.999994	0.0189852	0.800615	0.999996
ENSMUSG00000030397	Mark4	MAP/microtubule affinity regulating kinase 4	-0.1568	0.0704571	0.999996	0.135761	0.107684	0.999999	-0.123565	0.355687	0.999994	0.168997	0.06968	0.999996
ENSMUSG00000003810	Mast2	microtubule associated serine/threonine kinase 2	-0.229628	0.00820588	0.883336	-0.202098	0.0156301	0.974067	-0.0973274	0.451567	0.999994	-0.0697976	0.456184	0.999996
ENSMUSG00000031833	Mast3	microtubule associated serine/threonine kinase 3	-0.253537	0.00565514	0.724002	0.11146	0.189868	0.999999	-0.157938	0.238175	0.999994	0.207059	0.0294062	0.999996
ENSMUSG00000023952	Gtpbp2	GTP binding protein 2	0.444001	0.000155114	0.0366543	0.850383	1.99352e-08	7.07713e-07	0.0234784	0.902449	0.999994	0.42986	0.000448924	0.100559
ENSMUSG00000026779	Mastl	microtubule associated serine/threonine kinase-like	-0.0395415	0.578294	0.999996	-0.255391	0.000527387	0.65747	0.0364371	0.755735	0.999994	-0.179413	0.0168492	0.999996
ENSMUSG00000004933	Matk	megakaryocyte-associated tyrosine kinase	0.154076	0.762053	0.999996	0.00318515	0.995775	0.999999	0.0340529	0.969162	0.999994	-0.116838	0.837831	0.999996
ENSMUSG00000035683	Melk	maternal embryonic leucine zipper kinase	-0.264188	0.00146692	0.651681	-0.713298	5.67517e-09	6.95106e-07	0.0722433	0.548629	0.999994	-0.376867	0.000176108	0.152138
ENSMUSG00000025198	Erlin1	ER lipid raft associated 1	0.689023	2.38697e-09	4.13845e-07	1.09507	9.23821e-13	1.42201e-11	-0.0112476	0.931203	0.999994	0.394798	1.97913e-05	0.0491546
ENSMUSG00000020827	Mink1	misshapen-like kinase 1 (zebrafish)	-0.409566	0.000233354	0.0684064	-0.396129	0.000217349	0.0618868	-0.0510498	0.757761	0.999994	-0.0376135	0.74825	0.999996
ENSMUSG00000028708	Mknk1	MAP kinase-interacting serine/threonine kinase 1	0.3325	0.00159671	0.288682	0.624048	8.67767e-07	0.000130797	-0.0667998	0.686975	0.999994	0.224748	0.0282523	0.999996
ENSMUSG00000020190	Mknk2	MAP kinase-interacting serine/threonine kinase 2	-0.454275	1.89001e-06	0.00389915	-0.250964	0.000804669	0.691425	-0.10837	0.31643	0.999994	0.0949413	0.209166	0.999996
ENSMUSG00000012519	Mlkl	mixed lineage kinase domain-like	0.173941	0.0250302	0.999996	0.0751846	0.319741	0.999999	0.036244	0.788408	0.999994	-0.0625124	0.461912	0.999996
ENSMUSG00000021103	Mnat1	menage a trois 1	0.384914	0.000148962	0.0858106	0.0512749	0.562599	0.999999	0.134259	0.319527	0.999994	-0.19938	0.0330422	0.999996
ENSMUSG00000056458	Mok	MOK protein kinase	0.0470472	0.757602	0.999996	-0.0837876	0.555858	0.999999	0.071523	0.767602	0.999994	-0.0593117	0.723587	0.999996
ENSMUSG00000031402	Mpp1	membrane protein, palmitoylated	-0.0644652	0.459342	0.999996	-0.0962603	0.239647	0.999999	0.170929	0.187375	0.999994	0.139134	0.123986	0.999996
ENSMUSG00000017314	Mpp2	membrane protein, palmitoylated 2 (MAGUK p55 subfamily member 2)	-0.474546	0.00316069	0.0873991	-0.431214	0.00540362	0.110445	-0.138446	0.558095	0.999994	-0.0951153	0.594646	0.999996
ENSMUSG00000052373	Mpp3	membrane protein, palmitoylated 3 (MAGUK p55 subfamily member 3)	0.233512	0.116895	0.77886	0.0301887	0.855916	0.999999	0.0819606	0.755015	0.999994	-0.121363	0.461076	0.999996
ENSMUSG00000026142	Rhbdd1	rhomboid domain containing 1	0.618531	8.0854e-07	0.000162582	1.02297	2.41246e-10	5.78896e-09	0.027133	0.873447	0.999994	0.431573	0.00015433	0.0652578
ENSMUSG00000022456	Sept3	septin 3	0.749012	3.9099e-05	0.00106804	1.1327	6.55102e-08	9.16928e-07	0.0397142	0.890565	0.999994	0.423406	0.00639169	0.249912
ENSMUSG00000057440	Mpp7	membrane protein, palmitoylated 7 (MAGUK p55 subfamily member 7)	-0.0414201	0.664503	0.999996	0.229027	0.009507	0.810037	0.0465224	0.76241	0.999994	0.316969	0.00207672	0.546227
ENSMUSG00000028991	Mtor	mechanistic target of rapamycin kinase	-0.227189	0.00874634	0.898623	-0.0267146	0.76648	0.999999	-0.144172	0.259575	0.999994	0.0563025	0.556174	0.999996
ENSMUSG00000041939	Mvk	mevalonate kinase	0.28136	0.00909009	0.56149	0.158501	0.118928	0.999999	-0.00177693	0.993553	0.999994	-0.124635	0.263492	0.999996
ENSMUSG00000022836	Mylk	myosin, light polypeptide kinase	-0.646409	0.000254839	0.0071339	-0.452604	0.00467915	0.0894008	-0.34273	0.153475	0.999994	-0.148925	0.39578	0.999996
ENSMUSG00000029063	Nadk	NAD kinase	0.111721	0.0765101	0.999996	0.15634	0.0132472	0.999999	0.0139406	0.907783	0.999994	0.05856	0.400182	0.999996
ENSMUSG00000022253	Nadk2	NAD kinase 2, mitochondrial	0.228344	0.00910993	0.888907	0.148163	0.0714821	0.999999	0.0864937	0.520838	0.999994	0.00631272	0.953466	0.999996
ENSMUSG00000034744	Nagk	N-acetylglucosamine kinase	0.314105	0.00192861	0.367092	-0.126712	0.166246	0.999999	0.177338	0.222338	0.999994	-0.263478	0.0110272	0.947642
ENSMUSG00000031644	Nek1	NIMA (never in mitosis gene a)-related expressed kinase 1	0.335321	0.000626119	0.24501	0.396341	7.5731e-05	0.0442701	-0.0139497	0.937786	0.999994	0.04707	0.641899	0.999996
ENSMUSG00000026622	Nek2	NIMA (never in mitosis gene a)-related expressed kinase 2	-0.110643	0.114223	0.999996	-0.186212	0.00876631	0.999999	0.0284558	0.825211	0.999994	-0.0471135	0.559156	0.999996
ENSMUSG00000031478	Nek3	NIMA (never in mitosis gene a)-related expressed kinase 3	-0.0192588	0.93076	0.999996	-0.197122	0.297972	0.829339	0.0931339	0.780006	0.999994	-0.0847296	0.714344	0.999996
ENSMUSG00000021918	Nek4	NIMA (never in mitosis gene a)-related expressed kinase 4	0.238688	0.00972836	0.81295	0.328838	0.00056869	0.214981	0.0429351	0.78587	0.999994	0.133085	0.157611	0.999996
ENSMUSG00000026749	Nek6	NIMA (never in mitosis gene a)-related expressed kinase 6	0.323723	0.000902882	0.301063	0.335217	0.000422507	0.185734	0.104781	0.449081	0.999994	0.116276	0.212065	0.999996
ENSMUSG00000026393	Nek7	NIMA (never in mitosis gene a)-related expressed kinase 7	-0.133001	0.0380211	0.999996	-0.319112	2.32212e-05	0.168842	0.0565381	0.578578	0.999994	-0.129573	0.0594323	0.999996
ENSMUSG00000017405	Nek8	NIMA (never in mitosis gene a)-related expressed kinase 8	-0.347486	0.00370412	0.27476	-0.179145	0.100171	0.986114	-0.0197371	0.928595	0.999994	0.148603	0.226091	0.999996
ENSMUSG00000034290	Nek9	NIMA (never in mitosis gene a)-related expressed kinase 9	0.0603862	0.291034	0.999996	0.379253	6.02549e-07	0.0125602	-0.0961585	0.275322	0.999994	0.222709	0.00105492	0.999996
ENSMUSG00000095930	Nim1k	NIM1 serine/threonine protein kinase	0.465678	0.162098	0.461091	0.989688	0.00295698	0.013739	-0.0433848	0.952829	0.999994	0.480626	0.144105	0.601852
ENSMUSG00000017376	Nlk	nemo like kinase	0.126023	0.21311	0.999996	0.242864	0.015997	0.709184	-0.0472518	0.793369	0.999994	0.0695891	0.542905	0.999996
ENSMUSG00000037601	Nme1	NME/NM23 nucleoside diphosphate kinase 1	0.219305	0.0179285	0.92449	-0.233177	0.010849	0.779947	0.0778824	0.59564	0.999994	-0.3746	0.000713749	0.22662
ENSMUSG00000020857	Nme2	NME/NM23 nucleoside diphosphate kinase 2	0.507026	0.000504509	0.029551	0.432175	0.00152228	0.0713096	-0.135014	0.507016	0.999994	-0.209866	0.128186	0.999996
ENSMUSG00000073435	Nme3	NME/NM23 nucleoside diphosphate kinase 3	0.161859	0.234248	0.999996	-0.224714	0.0928128	0.757184	0.0809554	0.728444	0.999994	-0.305618	0.0384629	0.745592
ENSMUSG00000033762	Recql4	RecQ protein-like 4	1.11338	1.79739e-10	3.20675e-09	1.49633	9.23821e-13	5.03169e-12	0.0380047	0.818372	0.999994	0.420949	0.000119818	0.0668083
ENSMUSG00000032478	Nme6	NME/NM23 nucleoside diphosphate kinase 6	0.576555	8.67781e-06	0.00146016	0.178111	0.0701989	0.999999	0.126911	0.420606	0.999994	-0.271532	0.012712	0.894247
ENSMUSG00000037847	Nmrk1	nicotinamide riboside kinase 1	-0.0879926	0.554209	0.999996	-0.13854	0.318921	0.999999	0.0833499	0.729874	0.999994	0.0328021	0.852573	0.999996
ENSMUSG00000022043	Trim35	tripartite motif-containing 35	0.520956	2.8773e-06	0.00152714	0.901957	5.08231e-10	1.78416e-08	-0.0422556	0.773604	0.999994	0.338745	0.000652218	0.360092
ENSMUSG00000028469	Npr2	natriuretic peptide receptor 2	-0.328216	0.072286	0.476318	0.431007	0.0167483	0.158006	-0.278031	0.325565	0.999994	0.481193	0.0159729	0.239143
ENSMUSG00000052854	Nrk	Nik related kinase	-0.215347	0.561422	0.990482	0.496115	0.169692	0.406302	-0.606606	0.289613	0.999994	0.104856	0.810943	0.999996
ENSMUSG00000020032	Nuak1	NUAK family, SNF1-like kinase, 1	0.0139556	0.936699	0.999996	0.3249	0.028583	0.36345	0.00881162	0.974443	0.999994	0.319757	0.0483108	0.704633
ENSMUSG00000009772	Nuak2	NUAK family, SNF1-like kinase, 2	-0.0975047	0.308064	0.999996	-0.0870917	0.354813	0.999999	-0.00836807	0.963924	0.999994	0.00204498	0.986577	0.999996
ENSMUSG00000036737	Oxsr1	oxidative-stress responsive 1	-0.0471989	0.553395	0.999996	0.199329	0.00934408	0.999999	-0.085032	0.47684	0.999994	0.161496	0.048625	0.999996
ENSMUSG00000030774	Pak1	p21 (RAC1) activated kinase 1	-0.0973351	0.298239	0.999996	-0.132886	0.143984	0.999999	-0.0431371	0.792476	0.999994	-0.0786877	0.450092	0.999996
ENSMUSG00000022781	Pak2	p21 (RAC1) activated kinase 2	-0.267719	0.00288703	0.627116	-0.289466	0.0011834	0.411906	-0.048825	0.735286	0.999994	-0.0705726	0.453373	0.999996
ENSMUSG00000031284	Pak3	p21 (RAC1) activated kinase 3	-0.359276	0.0310104	0.352416	-0.469544	0.0060625	0.085916	-0.164079	0.524272	0.999994	-0.274348	0.130267	0.917174
ENSMUSG00000030602	Pak4	p21 (RAC1) activated kinase 4	-0.174943	0.0509441	0.999996	-0.166596	0.0580047	0.999999	-0.119369	0.388077	0.999994	-0.111022	0.25516	0.999996
ENSMUSG00000074923	Pak6	p21 (RAC1) activated kinase 6	-0.50565	8.78307e-05	0.0128099	-0.397161	0.000697349	0.0850879	-0.192715	0.239433	0.999994	-0.0842253	0.498328	0.999996
ENSMUSG00000033610	Pank1	pantothenate kinase 1	-0.316258	0.00421165	0.382766	-0.0418727	0.702031	0.999999	-0.0670418	0.699742	0.999994	0.207344	0.0659249	0.999996
ENSMUSG00000037514	Pank2	pantothenate kinase 2	-0.123759	0.107345	0.999996	-0.168457	0.0272365	0.999999	-0.0192379	0.892706	0.999994	-0.0639362	0.459099	0.999996
ENSMUSG00000018846	Pank3	pantothenate kinase 3	-0.413969	0.0010347	0.101666	-0.451924	0.000340347	0.0326787	-0.0867064	0.641354	0.999994	-0.124661	0.319544	0.999996
ENSMUSG00000029056	Pank4	pantothenate kinase 4	0.0551358	0.708742	0.999996	0.00255548	0.987267	0.999999	0.276866	0.19209	0.999994	0.224286	0.124178	0.999996
ENSMUSG00000026274	Pask	PAS domain containing serine/threonine kinase	-0.0421996	0.666471	0.999996	0.0600676	0.515543	0.999999	-0.0384384	0.817314	0.999994	0.0638288	0.538192	0.999996
ENSMUSG00000022033	Pbk	PDZ binding kinase	-0.0594536	0.555062	0.999996	-0.83019	2.1961e-08	8.77049e-07	0.176658	0.230819	0.999994	-0.594078	2.57143e-05	0.00337049
ENSMUSG00000027513	Pck1	phosphoenolpyruvate carboxykinase 1, cytosolic	-0.846044	0.416403	0.767218	-0.725978	0.420539	0.724407	0.730322	0.625398	0.999994	0.850388	0.449218	0.999996
ENSMUSG00000033538	Casp4	caspase 4, apoptosis-related cysteine peptidase	0.932518	1.14934e-06	2.50598e-05	1.30345	3.57933e-09	3.52971e-08	-0.0278814	0.921479	0.999994	0.343053	0.014897	0.537921
ENSMUSG00000050890	Pdik1l	PDLIM1 interacting kinase 1 like	-0.17344	0.0899182	0.999996	0.0364924	0.737216	0.999999	-0.0613752	0.724091	0.999994	0.148557	0.17638	0.999996
ENSMUSG00000006494	Pdk1	pyruvate dehydrogenase kinase, isoenzyme 1	-0.0591411	0.46201	0.999996	-0.284061	0.000740978	0.436004	0.0128836	0.934402	0.999994	-0.212036	0.0143372	0.999996
ENSMUSG00000038967	Pdk2	pyruvate dehydrogenase kinase, isoenzyme 2	-0.595493	0.000587492	0.016382	-0.294069	0.0452014	0.471774	0.0553187	0.84008	0.999994	0.356742	0.0350916	0.557243
ENSMUSG00000035232	Pdk3	pyruvate dehydrogenase kinase, isoenzyme 3	0.184989	0.0233734	0.999996	-0.114519	0.145543	0.999999	0.069212	0.594944	0.999994	-0.230295	0.00996624	0.999996
ENSMUSG00000019577	Pdk4	pyruvate dehydrogenase kinase, isoenzyme 4	-0.42156	0.245275	0.593071	0.402565	0.241243	0.534121	-0.259577	0.661218	0.999994	0.564548	0.139405	0.565374
ENSMUSG00000024122	Pdpk1	3-phosphoinositide dependent protein kinase 1	-0.127427	0.128917	0.999996	-0.101721	0.218339	0.999999	-0.0698397	0.608868	0.999994	-0.0441336	0.656322	0.999996
ENSMUSG00000029455	Aldh2	aldehyde dehydrogenase 2, mitochondrial	0.648907	6.58006e-06	0.000575974	1.015	6.15481e-09	1.45132e-07	-0.0497186	0.80635	0.999994	0.316376	0.00831633	0.619475
ENSMUSG00000071103	1700029J07Rik	RIKEN cDNA 1700029J07 gene	0.894397	1.52167e-06	3.601e-05	1.25748	4.06524e-09	4.60148e-08	0.0225732	0.937522	0.999994	0.385653	0.00616515	0.334186
ENSMUSG00000025271	Pfkfb1	6-phosphofructo-2-kinase/fructose-2,6-biphosphatase 1	0.163358	0.330078	0.999996	-0.368106	0.0288614	0.27078	-0.00155145	0.996186	0.999994	-0.533015	0.00539093	0.122257
ENSMUSG00000026409	Pfkfb2	6-phosphofructo-2-kinase/fructose-2,6-biphosphatase 2	-0.218357	0.00912795	0.957179	-0.166531	0.0369067	0.999999	-0.114096	0.357626	0.999994	-0.0622702	0.496826	0.999996
ENSMUSG00000026773	Pfkfb3	6-phosphofructo-2-kinase/fructose-2,6-biphosphatase 3	-0.403753	0.0701077	0.354464	-0.361627	0.0945998	0.379916	-0.0295441	0.946403	0.999994	0.0125826	0.964398	0.999996
ENSMUSG00000025648	Pfkfb4	6-phosphofructo-2-kinase/fructose-2,6-biphosphatase 4	-0.452012	0.00563945	0.127334	-0.711083	7.50275e-05	0.0015631	0.0199736	0.949045	0.999994	-0.239097	0.168475	0.999996
ENSMUSG00000020277	Pfkl	phosphofructokinase, liver, B-type	-0.0272886	0.799636	0.999996	0.00334944	0.976621	0.999999	0.0390722	0.828191	0.999994	0.0697103	0.52936	0.999996
ENSMUSG00000033065	Pfkm	phosphofructokinase, muscle	0.00283652	0.977363	0.999996	0.210971	0.0171532	0.912276	0.111689	0.417862	0.999994	0.319823	0.00212942	0.529499
ENSMUSG00000021196	Pfkp	phosphofructokinase, platelet	-0.25738	0.00609392	0.699898	-0.547371	2.05061e-06	0.000648466	0.0395898	0.80474	0.999994	-0.250402	0.0121738	0.999996
ENSMUSG00000062070	Pgk1	phosphoglycerate kinase 1	0.0565455	0.607151	0.999996	-0.460567	0.000104311	0.0185274	0.0776004	0.653682	0.999994	-0.439512	0.000609954	0.101699
ENSMUSG00000034055	Phka1	phosphorylase kinase alpha 1	-0.0753274	0.49559	0.999996	0.0668793	0.537659	0.999999	-0.0833285	0.636482	0.999994	0.0588782	0.637242	0.999996
ENSMUSG00000031295	Phka2	phosphorylase kinase alpha 2	-0.0352447	0.779087	0.999996	-0.0439852	0.721511	0.999999	-0.142978	0.420143	0.999994	-0.151718	0.223035	0.999996
ENSMUSG00000036879	Phkb	phosphorylase kinase beta	0.101972	0.264631	0.999996	-0.0117886	0.910197	0.999999	-0.100323	0.486781	0.999994	-0.214083	0.0309791	0.999996
ENSMUSG00000025537	Phkg1	phosphorylase kinase gamma 1	0.171251	0.570858	0.999996	-0.238194	0.423956	0.809681	-0.0368963	0.951781	0.999994	-0.446341	0.156923	0.645867
ENSMUSG00000030815	Phkg2	phosphorylase kinase, gamma 2 (testis)	0.108199	0.240729	0.999996	0.107775	0.230085	0.999999	0.02453	0.887427	0.999994	0.0241056	0.831921	0.999996
ENSMUSG00000025178	Pi4k2a	phosphatidylinositol 4-kinase type 2 alpha	0.00815182	0.929334	0.999996	0.246333	0.00275834	0.715191	0.0411223	0.766169	0.999994	0.279304	0.00246793	0.821013
ENSMUSG00000029186	Pi4k2b	phosphatidylinositol 4-kinase type 2 beta	-0.136318	0.0704204	0.999996	-0.179134	0.0171112	0.999999	0.00485883	0.972417	0.999994	-0.0379568	0.669106	0.999996
ENSMUSG00000041720	Pi4ka	phosphatidylinositol 4-kinase alpha	-0.0626963	0.295247	0.999996	0.151633	0.0110993	0.999999	-0.0821871	0.372434	0.999994	0.132142	0.0397288	0.999996
ENSMUSG00000038861	Pi4kb	phosphatidylinositol 4-kinase beta	-0.0858641	0.183526	0.999996	0.138051	0.0302377	0.999999	-0.0581542	0.57476	0.999994	0.165761	0.019315	0.999996
ENSMUSG00000030660	Pik3c2a	phosphatidylinositol-4-phosphate 3-kinase catalytic subunit type 2 alpha	-0.328703	0.00663954	0.356225	-0.439743	0.000520729	0.0446734	-0.107647	0.557768	0.999994	-0.218687	0.0819405	0.999996
ENSMUSG00000026447	Pik3c2b	phosphatidylinositol-4-phosphate 3-kinase catalytic subunit type 2 beta	-0.033366	0.861829	0.999996	-0.0974091	0.582551	0.999999	-0.0196785	0.95382	0.999994	-0.0837216	0.681028	0.999996
ENSMUSG00000033628	Pik3c3	phosphatidylinositol 3-kinase catalytic subunit type 3	-0.0254007	0.753035	0.999996	0.0864603	0.229628	0.999999	0.0807765	0.485815	0.999994	0.192638	0.0173832	0.999996
ENSMUSG00000027665	Pik3ca	phosphatidylinositol-4,5-bisphosphate 3-kinase catalytic subunit alpha	-0.187155	0.0247407	0.999996	-0.152548	0.0580261	0.999999	-0.0534415	0.698545	0.999994	-0.0188343	0.854068	0.999996
ENSMUSG00000032462	Pik3cb	phosphatidylinositol-4,5-bisphosphate 3-kinase catalytic subunit beta	-0.158242	0.0766097	0.999996	-0.171936	0.0503128	0.999999	-0.0366442	0.821941	0.999994	-0.0503383	0.632645	0.999996
ENSMUSG00000039936	Pik3cd	phosphatidylinositol-4,5-bisphosphate 3-kinase catalytic subunit delta	0.256933	0.26035	0.740591	0.696074	0.00267405	0.0192907	-0.0603035	0.88882	0.999994	0.378838	0.106703	0.63371
ENSMUSG00000041417	Pik3r1	phosphoinositide-3-kinase regulatory subunit 1	-0.370653	0.0072458	0.24886	-0.0759549	0.578495	0.999999	-0.26285	0.197169	0.999994	0.031848	0.84719	0.999996
ENSMUSG00000031834	Pik3r2	phosphoinositide-3-kinase regulatory subunit 2	-0.0387275	0.662721	0.999996	0.378607	6.63035e-05	0.0589677	-0.0618034	0.653312	0.999994	0.355531	0.000499433	0.266969
ENSMUSG00000028698	Pik3r3	phosphoinositide-3-kinase regulatory subunit 3	-0.790131	7.17992e-05	0.00141189	0.0192905	0.914882	0.999999	-0.160689	0.523885	0.999994	0.648732	0.00110339	0.0302744
ENSMUSG00000032571	Pik3r4	phosphoinositide-3-kinase regulatory subunit 4	-0.105602	0.26041	0.999996	-0.00454152	0.966306	0.999999	-0.0955707	0.520211	0.999994	0.0054901	0.963962	0.999996
ENSMUSG00000020901	Pik3r5	phosphoinositide-3-kinase regulatory subunit 5	-0.375864	0.0413607	0.341894	-0.338781	0.0609574	0.373481	-0.138517	0.640807	0.999994	-0.101435	0.64463	0.999996
ENSMUSG00000025949	Pikfyve	phosphoinositide kinase, FYVE type zinc finger containing	-0.0964325	0.276781	0.999996	0.202186	0.0206273	0.959651	-0.111985	0.410706	0.999994	0.186634	0.048853	0.999996
ENSMUSG00000024014	Pim1	proviral integration site 1	0.203962	0.081975	0.934396	0.305356	0.00874593	0.384069	0.225527	0.212043	0.999994	0.326921	0.010799	0.584483
ENSMUSG00000031155	Pim2	proviral integration site 2	-0.231432	0.0590147	0.80629	-0.0389868	0.765446	0.999999	-0.0557276	0.795321	0.999994	0.136718	0.305699	0.999996
ENSMUSG00000035828	Pim3	proviral integration site 3	-0.156194	0.301754	0.999996	0.152824	0.302001	0.997432	0.0853621	0.741206	0.999994	0.39438	0.0193234	0.396388
ENSMUSG00000028756	Pink1	PTEN induced putative kinase 1	0.0281965	0.783986	0.999996	0.302268	0.00170605	0.353613	0.0611494	0.698545	0.999994	0.335221	0.00189751	0.437835
ENSMUSG00000026737	Pip4k2a	phosphatidylinositol-5-phosphate 4-kinase, type II, alpha	0.0043327	0.972357	0.999996	0.302806	0.00708109	0.387875	-0.102791	0.567309	0.999994	0.195683	0.0985049	0.999996
ENSMUSG00000018547	Pip4k2b	phosphatidylinositol-5-phosphate 4-kinase, type II, beta	-0.319497	0.0035555	0.366276	0.07566	0.464251	0.999999	-0.176212	0.265126	0.999994	0.218945	0.0495239	0.999996
ENSMUSG00000025417	Pip4k2c	phosphatidylinositol-5-phosphate 4-kinase, type II, gamma	-0.0678668	0.276715	0.999996	0.116062	0.0562826	0.999999	0.00454933	0.969023	0.999994	0.188478	0.00699569	0.999996
ENSMUSG00000028126	Pip5k1a	phosphatidylinositol-4-phosphate 5-kinase, type 1 alpha	-0.0693464	0.300908	0.999996	-0.0243605	0.731849	0.999999	-0.0114643	0.931171	0.999994	0.0335216	0.668591	0.999996
ENSMUSG00000024867	Pip5k1b	phosphatidylinositol-4-phosphate 5-kinase, type 1 beta	-0.407104	0.0100597	0.203852	-0.571037	0.000647505	0.0150753	-0.105208	0.674504	0.999994	-0.269142	0.112724	0.932562
ENSMUSG00000034902	Pip5k1c	phosphatidylinositol-4-phosphate 5-kinase, type 1 gamma	-0.271031	0.00161279	0.602324	-0.0414951	0.612249	0.999999	-0.150891	0.213982	0.999994	0.0786457	0.367514	0.999996
ENSMUSG00000024247	Pkdcc	protein kinase domain containing, cytoplasmic	0.161738	0.30778	0.999996	0.149113	0.323667	0.999999	0.220888	0.36181	0.999994	0.208263	0.207733	0.999996
ENSMUSG00000032294	Pkm	pyruvate kinase, muscle	-0.100313	0.305902	0.999996	-0.156543	0.10012	0.999999	0.0960489	0.535088	0.999994	0.0398191	0.73476	0.999996
ENSMUSG00000023908	Pkmyt1	protein kinase, membrane associated tyrosine/threonine 1	0.356021	0.000736126	0.190055	0.231307	0.0142849	0.78411	0.124655	0.39983	0.999994	-5.81059e-05	0.999615	0.999996
ENSMUSG00000057672	Pkn1	protein kinase N1	-0.204775	0.0153727	0.999996	0.199142	0.0154675	0.995782	-0.172656	0.176793	0.999994	0.23126	0.0114643	0.999996
ENSMUSG00000004591	Pkn2	protein kinase N2	-0.0391222	0.596623	0.999996	-0.0527216	0.456116	0.999999	-0.0564145	0.624684	0.999994	-0.0700139	0.365958	0.999996
ENSMUSG00000026785	Pkn3	protein kinase N3	-0.127313	0.311949	0.999996	-0.0518585	0.690862	0.999999	0.0435703	0.850116	0.999994	0.119025	0.38714	0.999996
ENSMUSG00000038151	Prdm1	PR domain containing 1, with ZNF domain	-1.07507	0.00389702	0.0214996	-2.06592	2.05389e-05	7.25685e-05	-0.278066	0.59885	0.999994	-1.26892	0.00966507	0.0620643
ENSMUSG00000030867	Plk1	polo like kinase 1	-0.254017	0.00097724	0.735355	-0.639374	8.09997e-09	2.25087e-06	-0.0190205	0.883086	0.999994	-0.404377	4.15424e-05	0.0574693
ENSMUSG00000021701	Plk2	polo like kinase 2	-0.145311	0.01752	0.999996	-0.261424	0.000107474	0.607252	0.281892	0.0115577	0.999994	0.165779	0.0124517	0.999996
ENSMUSG00000028680	Plk3	polo like kinase 3	-0.38864	0.00144886	0.149428	-0.552256	2.77115e-05	0.00303385	0.0575045	0.761759	0.999994	-0.106111	0.400768	0.999996
ENSMUSG00000025758	Plk4	polo like kinase 4	-0.0205219	0.73907	0.999996	-0.243965	0.000131963	0.78411	0.118562	0.176948	0.999994	-0.104881	0.0858763	0.999996
ENSMUSG00000027952	Pmvk	phosphomevalonate kinase	-0.210612	0.0189542	0.977611	-0.427563	3.66652e-05	0.0201525	-0.0130699	0.940784	0.999994	-0.230021	0.0192122	0.999996
ENSMUSG00000002963	Pnkp	polynucleotide kinase 3'- phosphatase	0.240621	0.0119413	0.795961	0.123367	0.170104	0.999999	0.127656	0.375194	0.999994	0.0104025	0.929143	0.999996
ENSMUSG00000037251	Pomk	protein-O-mannose kinase	-0.280132	0.00363975	0.555031	-0.198401	0.0267042	0.968907	-0.0482388	0.756241	0.999994	0.0334919	0.761059	0.999996
ENSMUSG00000033526	Ppip5k1	diphosphoinositol pentakisphosphate kinase 1	-0.230651	0.0121772	0.864622	-0.143284	0.0990375	0.999999	-0.0268474	0.873447	0.999994	0.0605193	0.554535	0.999996
ENSMUSG00000040648	Ppip5k2	diphosphoinositol pentakisphosphate kinase 2	0.297719	0.00221829	0.447527	0.252739	0.00604332	0.658718	-0.0058258	0.972672	0.999994	-0.0508056	0.628679	0.999996
ENSMUSG00000050271	Prag1	PEAK1 related kinase activating pseudokinase 1	-0.395674	0.00275531	0.16213	-0.0177524	0.897388	0.999999	-0.159994	0.397552	0.999994	0.217927	0.102088	0.999996
ENSMUSG00000050697	Prkaa1	protein kinase, AMP-activated, alpha 1 catalytic subunit	-0.286029	0.000770535	0.491923	-0.380615	2.63292e-05	0.0432238	-0.0017153	0.990237	0.999994	-0.0963011	0.249643	0.999996
ENSMUSG00000028518	Prkaa2	protein kinase, AMP-activated, alpha 2 catalytic subunit	-0.214148	0.0905471	0.877304	0.0872241	0.489837	0.999999	-0.0712169	0.743543	0.999994	0.230155	0.0900419	0.999996
ENSMUSG00000029513	Prkab1	protein kinase, AMP-activated, beta 1 non-catalytic subunit	-0.275119	0.000191123	0.554467	-0.409501	9.47256e-07	0.0064441	0.0788564	0.415878	0.999994	-0.055526	0.433646	0.999996
ENSMUSG00000038205	Prkab2	protein kinase, AMP-activated, beta 2 non-catalytic subunit	-0.0762502	0.337995	0.999996	0.0103768	0.906987	0.999999	0.048714	0.712997	0.999994	0.135341	0.107869	0.999996
ENSMUSG00000005469	Prkaca	protein kinase, cAMP dependent, catalytic, alpha	-0.104506	0.101488	0.999996	-0.165057	0.0103204	0.999999	0.0130422	0.914696	0.999994	-0.047509	0.512383	0.999996
ENSMUSG00000030785	Cox6a2	cytochrome c oxidase subunit 6A2	1.52346	3.83924e-07	2.83168e-06	1.8854	6.90436e-09	3.25511e-08	-0.12253	0.760872	0.999994	0.239414	0.223505	0.999996
ENSMUSG00000067713	Prkag1	protein kinase, AMP-activated, gamma 1 non-catalytic subunit	0.0866257	0.278053	0.999996	-0.187354	0.0176845	0.999999	0.168514	0.170893	0.999994	-0.105465	0.218909	0.999996
ENSMUSG00000028944	Prkag2	protein kinase, AMP-activated, gamma 2 non-catalytic subunit	0.0900393	0.244094	0.999996	-0.265721	0.00117521	0.56966	0.121497	0.309152	0.999994	-0.234264	0.00715365	0.999996
ENSMUSG00000020612	Prkar1a	protein kinase, cAMP dependent regulatory, type I, alpha	-0.14023	0.01922	0.999996	-0.178573	0.0032509	0.999999	0.0976568	0.280371	0.999994	0.0593139	0.358714	0.999996
ENSMUSG00000032601	Prkar2a	protein kinase, cAMP dependent regulatory, type II alpha	-0.326526	0.000244662	0.245587	-0.202826	0.00914282	0.99758	-0.0537532	0.674504	0.999994	0.0699473	0.415649	0.999996
ENSMUSG00000032350	Gclc	glutamate-cysteine ligase, catalytic subunit	-0.969681	1.78543e-09	5.02807e-08	-0.612912	3.52775e-07	7.27487e-05	0.0266261	0.872426	0.999994	0.383395	0.00054318	0.188692
ENSMUSG00000050965	Prkca	protein kinase C, alpha	-0.0944401	0.28014	0.999996	0.177225	0.0373586	0.999999	-0.0356748	0.822057	0.999994	0.23599	0.0136628	0.999996
ENSMUSG00000021948	Prkcd	protein kinase C, delta	-0.125868	0.0881367	0.999996	-0.0915859	0.203607	0.999999	0.0672734	0.567541	0.999994	0.101555	0.202596	0.999996
ENSMUSG00000045038	Prkce	protein kinase C, epsilon	0.0092645	0.940831	0.999996	0.7349	4.11855e-07	2.3813e-05	-0.267965	0.131189	0.999994	0.45767	0.000454498	0.0749124
ENSMUSG00000021108	Prkch	protein kinase C, eta	-0.280242	0.0421879	0.590369	-0.0689834	0.622468	0.999999	-0.0386052	0.879494	0.999994	0.172653	0.245834	0.999996
ENSMUSG00000037643	Prkci	protein kinase C, iota	-0.22529	0.0153166	0.892054	-0.241632	0.00844611	0.728166	-0.038947	0.812234	0.999994	-0.0552897	0.599219	0.999996
ENSMUSG00000029053	Prkcz	protein kinase C, zeta	-0.0414192	0.642662	0.999996	0.0683785	0.41135	0.999999	-0.0149666	0.928396	0.999994	0.0948311	0.297162	0.999996
ENSMUSG00000041187	Prkd2	protein kinase D2	-0.172234	0.0819748	0.999996	0.00319457	0.977893	0.999999	-0.00234048	0.98963	0.999994	0.173088	0.103196	0.999996
ENSMUSG00000024070	Prkd3	protein kinase D3	0.0227865	0.790348	0.999996	0.121584	0.10989	0.999999	-0.0123099	0.937522	0.999994	0.0864879	0.308135	0.999996
ENSMUSG00000022672	Prkdc	protein kinase, DNA activated, catalytic polypeptide	-0.0763764	0.458321	0.999996	-0.12527	0.205899	0.999999	-0.167664	0.279528	0.999994	-0.216557	0.0466829	0.999996
ENSMUSG00000029334	Prkg2	protein kinase, cGMP-dependent, type II	-0.59171	0.0256078	0.14006	-1.45099	5.01112e-05	0.000190878	0.0169794	0.970194	0.999994	-0.842303	0.00773031	0.0682262
ENSMUSG00000002731	Prkra	protein kinase, interferon inducible double stranded RNA dependent activator	0.490222	1.2827e-05	0.00580272	0.383381	0.000115929	0.0634242	0.0729956	0.617545	0.999994	-0.0338453	0.74567	0.999996
ENSMUSG00000035725	Prkx	protein kinase, X-linked	-0.37335	0.000981369	0.162045	-0.4	0.000401103	0.0697235	-0.127954	0.412727	0.999994	-0.154604	0.169548	0.999996
ENSMUSG00000048310	Pskh1	protein serine kinase H1	0.0689187	0.480934	0.999996	0.481614	1.84865e-05	0.00623139	-0.117118	0.426672	0.999994	0.295578	0.00527274	0.721853
ENSMUSG00000063179	Pstk	phosphoseryl-tRNA kinase	0.364048	0.003028	0.225608	0.0597628	0.614164	0.999999	0.154856	0.390549	0.999994	-0.149429	0.222647	0.999996
ENSMUSG00000022607	Ptk2	PTK2 protein tyrosine kinase 2	-0.0599783	0.288367	0.999996	-0.0635979	0.249108	0.999999	-0.00551864	0.960295	0.999994	-0.0091382	0.897974	0.999996
ENSMUSG00000059456	Ptk2b	PTK2 protein tyrosine kinase 2 beta	-0.00665329	0.953428	0.999996	0.188785	0.0462038	0.992769	0.108009	0.481271	0.999994	0.303447	0.00567121	0.673092
ENSMUSG00000023972	Ptk7	PTK7 protein tyrosine kinase 7	-0.0998341	0.261661	0.999996	0.263503	0.00373683	0.587928	-0.105558	0.44264	0.999994	0.257779	0.00895322	0.99416
ENSMUSG00000033885	Pxk	PX domain containing serine/threonine kinase	-0.322585	0.000124924	0.240633	-0.382353	1.0706e-05	0.0314807	-0.00431218	0.973473	0.999994	-0.0640805	0.421612	0.999996
ENSMUSG00000020372	Rack1	receptor for activated C kinase 1	0.378487	0.00472829	0.214705	0.415382	0.00184882	0.0916634	-0.0886483	0.675786	0.999994	-0.0517528	0.735542	0.999996
ENSMUSG00000000441	Raf1	v-raf-leukemia viral oncogene 1	0.0528646	0.465157	0.999996	0.0821176	0.233182	0.999999	0.0469259	0.692438	0.999994	0.0761789	0.320707	0.999996
ENSMUSG00000029136	Rbks	ribokinase	-0.0954649	0.785273	0.999996	0.0514615	0.890897	0.999999	-0.466495	0.358144	0.999994	-0.319568	0.373638	0.999996
ENSMUSG00000023045	Soat2	sterol O-acyltransferase 2	1.45781	3.54477e-08	2.69995e-07	1.81231	6.00336e-10	3.214e-09	-0.227429	0.430908	0.999994	0.12707	0.441706	0.999996
ENSMUSG00000024712	Rfk	riboflavin kinase	0.0403671	0.595372	0.999996	-0.133051	0.0599669	0.999999	0.0910396	0.412222	0.999994	-0.0823783	0.295297	0.999996
ENSMUSG00000021428	Riok1	RIO kinase 1	0.251744	0.00283056	0.743454	0.247126	0.00237732	0.710655	0.0932389	0.449081	0.999994	0.0886202	0.294535	0.999996
ENSMUSG00000116564	Riok2	RIO kinase 2	0.282396	0.0010077	0.5214	-0.0214826	0.799319	0.999999	0.194009	0.125281	0.999994	-0.109869	0.18548	0.999996
ENSMUSG00000024404	Riok3	RIO kinase 3	0.137892	0.0475865	0.999996	-0.0607514	0.378654	0.999999	0.0534538	0.64048	0.999994	-0.145189	0.0519146	0.999996
ENSMUSG00000021408	Ripk1	receptor (TNFRSF)-interacting serine-threonine kinase 1	-0.103724	0.28215	0.999996	0.313512	0.00166252	0.304362	-0.0567578	0.729457	0.999994	0.360479	0.001377	0.312078
ENSMUSG00000041135	Ripk2	receptor (TNFRSF)-interacting serine-threonine kinase 2	0.387281	0.00227368	0.167908	0.544483	5.72069e-05	0.00502872	-0.055304	0.818109	0.999994	0.101898	0.420161	0.999996
ENSMUSG00000022221	Ripk3	receptor-interacting serine-threonine kinase 3	-0.207719	0.0332988	0.966197	-0.164215	0.081454	0.999999	-0.0534475	0.7476	0.999994	-0.00994292	0.936152	0.999996
ENSMUSG00000005251	Ripk4	receptor-interacting serine-threonine kinase 4	-0.42286	3.11608e-05	0.0263664	-0.350766	0.000136284	0.11744	0.0661489	0.617545	0.999994	0.138243	0.118958	0.999996
ENSMUSG00000024290	Rock1	Rho-associated coiled-coil containing protein kinase 1	-0.192123	0.112637	0.97549	-0.186305	0.11688	0.934238	-0.0626472	0.764487	0.999994	-0.056829	0.693163	0.999996
ENSMUSG00000020580	Rock2	Rho-associated coiled-coil containing protein kinase 2	-0.206618	0.020791	0.998727	-0.150258	0.080424	0.999999	-0.111635	0.409068	0.999994	-0.0552746	0.58539	0.999996
ENSMUSG00000003644	Rps6ka1	ribosomal protein S6 kinase polypeptide 1	-0.269142	0.001487	0.614419	-0.0543826	0.484026	0.999999	-0.000663275	0.996451	0.999994	0.214097	0.0129074	0.999996
ENSMUSG00000037921	Ddx60	DEAD (Asp-Glu-Ala-Asp) box polypeptide 60	0.538246	4.6921e-05	0.0062769	0.891933	3.53288e-08	9.51316e-07	-0.0800894	0.660973	0.999994	0.273598	0.0191499	0.88711
ENSMUSG00000031309	Rps6ka3	ribosomal protein S6 kinase polypeptide 3	-0.369936	0.000751699	0.160004	-0.491172	2.77793e-05	0.00665558	-0.100719	0.517922	0.999994	-0.221955	0.040261	0.999996
ENSMUSG00000024952	Rps6ka4	ribosomal protein S6 kinase, polypeptide 4	-0.199181	0.0108395	0.999996	-0.119041	0.106787	0.999999	-0.0586457	0.636294	0.999994	0.0214948	0.818828	0.999996
ENSMUSG00000021180	Rps6ka5	ribosomal protein S6 kinase, polypeptide 5	-0.32378	0.0109001	0.391005	-0.162756	0.173764	0.999999	-0.0840496	0.678052	0.999994	0.0769741	0.592186	0.999996
ENSMUSG00000025665	Rps6ka6	ribosomal protein S6 kinase polypeptide 6	0.0463025	0.756537	0.999996	-0.0914075	0.512716	0.999999	-0.0280089	0.915129	0.999994	-0.165719	0.26637	0.999996
ENSMUSG00000020516	Rps6kb1	ribosomal protein S6 kinase, polypeptide 1	-0.158664	0.0428858	0.999996	-0.23628	0.0033195	0.786905	-0.0011642	0.994412	0.999994	-0.0787804	0.359749	0.999996
ENSMUSG00000024830	Rps6kb2	ribosomal protein S6 kinase, polypeptide 2	-0.103542	0.268503	0.999996	-0.0241289	0.810865	0.999999	0.0622549	0.687881	0.999994	0.141668	0.15616	0.999996
ENSMUSG00000089872	Rps6kc1	ribosomal protein S6 kinase polypeptide 1	0.000122035	0.99909	0.999996	0.251515	0.0106649	0.661086	-0.034292	0.853002	0.999994	0.217101	0.0401906	0.999996
ENSMUSG00000032547	Ryk	receptor-like tyrosine kinase	0.229707	0.00114249	0.940062	0.18204	0.0054586	0.999999	0.0429873	0.692831	0.999994	-0.0046795	0.955074	0.999996
ENSMUSG00000024299	Adamts10	a disintegrin-like and metallopeptidase (reprolysin type) with thrombospondin type 1 motif, 10	0.834418	0.001854	0.0150401	1.18637	2.2766e-05	0.000171978	0.227809	0.585037	0.999994	0.579763	0.019315	0.185581
ENSMUSG00000024941	Scyl1	SCY1-like 1 (S. cerevisiae)	0.033108	0.686072	0.999996	0.162609	0.0302684	0.999999	0.0991812	0.400663	0.999994	0.228682	0.00746627	0.999996
ENSMUSG00000069539	Scyl2	SCY1-like 2 (S. cerevisiae)	-0.244381	0.00301854	0.795972	-0.200802	0.00986019	0.999999	-0.0436668	0.742954	0.999994	-8.76885e-05	0.999253	0.999996
ENSMUSG00000026584	Scyl3	SCY1-like 3 (S. cerevisiae)	0.0270521	0.787937	0.999996	0.190791	0.0322828	0.999999	0.0800692	0.588178	0.999994	0.243808	0.0146653	0.999996
ENSMUSG00000027737	Slc7a11	solute carrier family 7 (cationic amino acid transporter, y+ system), member 11	1.23926	6.64049e-09	7.47801e-08	1.58826	7.37439e-11	4.19922e-10	-0.274684	0.186139	0.999994	0.0743205	0.581762	0.999996
ENSMUSG00000021485	Mxd3	Max dimerization protein 3	-0.67311	0.00125121	0.017196	-1.87456	9.51099e-09	4.50556e-08	-0.0328342	0.928335	0.999994	-1.23428	4.15621e-05	0.000599382
ENSMUSG00000025915	Sgk3	serum/glucocorticoid regulated kinase 3	-0.184792	0.0342112	0.999996	-0.206995	0.0161053	0.93956	0.00681793	0.966983	0.999994	-0.0153857	0.888998	0.999996
ENSMUSG00000005951	Shpk	sedoheptulokinase	0.254768	0.20736	0.723275	0.455514	0.0193739	0.145981	0.148649	0.660155	0.999994	0.349395	0.0950432	0.675097
ENSMUSG00000020641	Rsad2	radical S-adenosyl methionine domain containing 2	0.66496	2.07833e-05	0.00102051	1.01021	5.75689e-08	1.0054e-06	-0.0883737	0.664154	0.999994	0.256881	0.0481907	0.990036
ENSMUSG00000037112	Sik2	salt inducible kinase 2	-0.402009	0.000264093	0.0787523	-0.288818	0.0034986	0.43505	-0.116295	0.424036	0.999994	-0.00310425	0.980261	0.999996
ENSMUSG00000034135	Sik3	SIK family kinase 3	-0.0499315	0.622389	0.999996	-0.0124659	0.909169	0.999999	-0.106115	0.481187	0.999994	-0.0686497	0.528807	0.999996
ENSMUSG00000025060	Slk	STE20-like kinase	-0.370929	3.70497e-05	0.0751017	-0.321721	0.000109486	0.194721	-0.136074	0.228521	0.999994	-0.0868655	0.277362	0.999996
ENSMUSG00000030655	Smg1	SMG1 homolog, phosphatidylinositol 3-kinase-related kinase (C. elegans)	-0.207357	0.0793122	0.921228	-0.19917	0.0870644	0.891819	-0.234678	0.200316	0.999994	-0.226491	0.0771438	0.999996
ENSMUSG00000038145	Snrk	SNF related kinase	-0.165679	0.229635	0.999996	0.207079	0.122617	0.826906	-0.165849	0.436575	0.999994	0.206909	0.161127	0.999996
ENSMUSG00000026207	Speg	SPEG complex locus	0.158685	0.60552	0.999996	0.791409	0.00689313	0.0322276	-0.225178	0.651165	0.999994	0.407547	0.175462	0.710494
ENSMUSG00000061878	Sphk1	sphingosine kinase 1	-0.324709	0.00892684	0.38003	-0.409663	0.00123803	0.086576	-0.0203858	0.930753	0.999994	-0.10534	0.436404	0.999996
ENSMUSG00000057342	Sphk2	sphingosine kinase 2	0.345368	0.0045216	0.290197	0.709423	1.55318e-06	8.76492e-05	-0.0348468	0.874867	0.999994	0.329209	0.00867669	0.560253
ENSMUSG00000027646	Src	Rous sarcoma oncogene	-0.0746008	0.436722	0.999996	0.177894	0.0519377	0.999999	-0.0372714	0.829254	0.999994	0.215223	0.0337244	0.999996
ENSMUSG00000004865	Srpk1	serine/arginine-rich protein specific kinase 1	0.263356	0.000104427	0.657482	0.43712	8.9374e-08	0.000880329	0.0405191	0.673761	0.999994	0.214283	0.00144373	0.999996
ENSMUSG00000062604	Srpk2	serine/arginine-rich protein specific kinase 2	0.0875804	0.190338	0.999996	0.166442	0.0130228	0.999999	0.0171039	0.890481	0.999994	0.0959651	0.181588	0.999996
ENSMUSG00000020272	Stk10	serine/threonine kinase 10	-0.303258	0.000634948	0.383861	-0.0852432	0.275148	0.999999	-0.125383	0.305222	0.999994	0.0926326	0.286712	0.999996
ENSMUSG00000003068	Stk11	serine/threonine kinase 11	-0.198397	0.0146781	0.999996	-0.0967754	0.21298	0.999999	-0.102559	0.40133	0.999994	-0.000937506	0.993387	0.999996
ENSMUSG00000026201	Stk16	serine/threonine kinase 16	0.0235901	0.764152	0.999996	-0.0846803	0.230166	0.999999	0.0496273	0.679475	0.999994	-0.0586431	0.466006	0.999996
ENSMUSG00000026094	Stk17b	serine/threonine kinase 17b (apoptosis-inducing)	-0.0325519	0.723692	0.999996	-0.140611	0.087251	0.999999	0.164218	0.206575	0.999994	0.0561588	0.563529	0.999996
ENSMUSG00000061207	Stk19	serine/threonine kinase 19	0.349271	0.000447057	0.190361	0.415388	5.09062e-05	0.0279987	-0.113303	0.413102	0.999994	-0.047186	0.642058	0.999996
ENSMUSG00000063410	Stk24	serine/threonine kinase 24	-0.249088	0.00195765	0.767833	-0.277318	0.000557485	0.477727	0.0477356	0.702184	0.999994	0.019506	0.833602	0.999996
ENSMUSG00000026277	Stk25	serine/threonine kinase 25 (yeast)	-0.0338444	0.650775	0.999996	-0.0255306	0.732063	0.999999	0.122577	0.254302	0.999994	0.130891	0.0819599	0.999996
ENSMUSG00000022329	Stk3	serine/threonine kinase 3	0.22687	0.00622467	0.911546	0.178574	0.0219263	0.999999	0.189122	0.137427	0.999994	0.140826	0.0949689	0.999996
ENSMUSG00000037885	Stk35	serine/threonine kinase 35	-0.265498	0.00320826	0.642517	-0.0391566	0.656992	0.999999	-0.104339	0.420143	0.999994	0.122003	0.180801	0.999996
ENSMUSG00000033276	Stk36	serine/threonine kinase 36	-0.157981	0.293577	0.999996	0.0391284	0.807688	0.999999	-0.00749957	0.977895	0.999994	0.189609	0.238536	0.999996
ENSMUSG00000024006	Stk38	serine/threonine kinase 38	-0.206152	0.00335751	0.999996	-0.231682	0.0010217	0.858982	-0.0724625	0.4831	0.999994	-0.0979922	0.170336	0.999996
ENSMUSG00000001630	Stk38l	serine/threonine kinase 38 like	-0.0864971	0.415592	0.999996	0.0488569	0.649128	0.999999	-0.00777892	0.968466	0.999994	0.127575	0.256132	0.999996
ENSMUSG00000027030	Stk39	serine/threonine kinase 39	0.247635	0.00134515	0.785088	0.261101	0.000596684	0.607252	0.0179815	0.89212	0.999994	0.0314477	0.705711	0.999996
ENSMUSG00000018209	Stk4	serine/threonine kinase 4	-0.113428	0.183936	0.999996	0.0900586	0.283992	0.999999	-0.0386659	0.79952	0.999994	0.164821	0.0729063	0.999996
ENSMUSG00000042608	Stk40	serine/threonine kinase 40	-0.00117472	0.99084	0.999996	0.0177858	0.861277	0.999999	-0.084685	0.560263	0.999994	-0.0657245	0.52228	0.999996
ENSMUSG00000032899	Styk1	serine/threonine/tyrosine kinase 1	0.0480388	0.56776	0.999996	-0.0911777	0.244633	0.999999	0.127238	0.306008	0.999994	-0.011978	0.906617	0.999996
ENSMUSG00000021457	Syk	spleen tyrosine kinase	-0.703766	0.00291766	0.0274128	-0.389506	0.0770455	0.318426	-0.379412	0.254138	0.999994	-0.0651516	0.818878	0.999996
ENSMUSG00000017291	Taok1	TAO kinase 1	-0.333468	0.0112701	0.360463	-0.365311	0.0052138	0.191743	-0.101273	0.621959	0.999994	-0.133116	0.337002	0.999996
ENSMUSG00000059981	Taok2	TAO kinase 2	-0.338885	0.00164239	0.267536	-0.178336	0.0662647	0.999999	-0.128343	0.400122	0.999994	0.0322066	0.791591	0.999996
ENSMUSG00000061288	Taok3	TAO kinase 3	-0.256875	0.00546064	0.702546	0.0589482	0.506476	0.999999	-0.141235	0.298589	0.999994	0.174588	0.0654644	0.999996
ENSMUSG00000028030	Tbck	TBC1 domain containing kinase	0.0351021	0.778071	0.999996	0.309199	0.00688759	0.362725	-0.0821391	0.664724	0.999994	0.191958	0.111028	0.999996
ENSMUSG00000020115	Tbk1	TANK-binding kinase 1	-0.0790037	0.201594	0.999996	-0.0457601	0.459747	0.999999	0.0824857	0.388535	0.999994	0.115729	0.0816899	0.999996
ENSMUSG00000029217	Tec	tec protein tyrosine kinase	-0.0917467	0.231883	0.999996	-0.395527	1.6613e-05	0.0274204	0.112269	0.339066	0.999994	-0.191511	0.02338	0.999996
ENSMUSG00000028458	Tesk1	testis specific protein kinase 1	-0.082861	0.417408	0.999996	0.45588	6.56543e-05	0.0163498	-0.189621	0.222011	0.999994	0.34912	0.0023906	0.394262
ENSMUSG00000033985	Tesk2	testis-specific kinase 2	-0.284951	0.19334	0.649658	-0.201816	0.343476	0.822182	0.0681561	0.866978	0.999994	0.151291	0.546549	0.999996
ENSMUSG00000007613	Tgfbr1	transforming growth factor, beta receptor I	-0.147503	0.143916	0.999996	-0.0853517	0.400517	0.999999	-0.129138	0.407913	0.999994	-0.066987	0.565465	0.999996
ENSMUSG00000026822	Lcn2	lipocalin 2	0.556313	1.0545e-05	0.00207229	0.900652	7.409e-09	2.29724e-07	-0.0250786	0.890448	0.999994	0.319261	0.00438219	0.572838
ENSMUSG00000030516	Tjp1	tight junction protein 1	-0.394108	9.08493e-05	0.0640301	-0.443187	1.44407e-05	0.0102357	-0.136945	0.295731	0.999994	-0.186024	0.0426952	0.999996
ENSMUSG00000033540	Idua	iduronidase, alpha-L	0.468711	0.000459446	0.0429818	0.811604	3.34456e-07	1.12059e-05	0.0535987	0.804822	0.999994	0.396492	0.00265032	0.246709
ENSMUSG00000034917	Tjp3	tight junction protein 3	-0.371005	0.00423996	0.225461	-0.0142575	0.917653	0.999999	-0.09681	0.626572	0.999994	0.259937	0.0501255	0.96821
ENSMUSG00000025574	Tk1	thymidine kinase 1	-0.0696691	0.442152	0.999996	-0.604541	4.90651e-07	0.000106228	0.105263	0.44004	0.999994	-0.429609	0.000192704	0.0729574
ENSMUSG00000035824	Tk2	thymidine kinase 2, mitochondrial	0.211651	0.0100186	0.999245	0.299648	0.000437774	0.333356	0.0852145	0.497987	0.999994	0.173212	0.0395639	0.999996
ENSMUSG00000034371	Tkfc	triokinase, FMN cyclase	0.17518	0.0381264	0.999996	0.183342	0.0258039	0.999999	0.0439171	0.763531	0.999994	0.0520797	0.584064	0.999996
ENSMUSG00000041997	Tlk1	tousled-like kinase 1	0.0264819	0.810615	0.999996	0.135022	0.164966	0.999999	-0.0423738	0.814901	0.999994	0.0661659	0.560934	0.999996
ENSMUSG00000020694	Tlk2	tousled-like kinase 2 (Arabidopsis)	0.106854	0.0705405	0.999996	0.301689	1.81404e-05	0.249627	0.0211283	0.84809	0.999994	0.215963	0.00179901	0.999996
ENSMUSG00000027692	Tnik	TRAF2 and NCK interacting kinase	-0.351054	0.00153062	0.230632	-0.253179	0.0135708	0.648477	-0.17069	0.274201	0.999994	-0.0728153	0.535356	0.999996
ENSMUSG00000001583	Tnk1	tyrosine kinase, non-receptor, 1	-0.00507687	0.961101	0.999996	0.144054	0.0992469	0.999999	0.0875036	0.543699	0.999994	0.236635	0.0165878	0.999996
ENSMUSG00000022791	Tnk2	tyrosine kinase, non-receptor, 2	-0.147481	0.215985	0.999996	-0.0317238	0.807478	0.999999	-0.106858	0.575687	0.999994	0.00889945	0.953888	0.999996
ENSMUSG00000029735	Tpk1	thiamine pyrophosphokinase	0.0762705	0.425327	0.999996	-0.0828989	0.365057	0.999999	0.207726	0.157756	0.999994	0.0485563	0.655414	0.999996
ENSMUSG00000026062	Slc9a2	solute carrier family 9 (sodium/hydrogen exchanger), member 2	-1.01779	0.000253668	0.00252159	-0.676441	0.004343	0.0280212	0.0616768	0.882583	0.999994	0.403023	0.13375	0.643255
ENSMUSG00000020601	Trib2	tribbles pseudokinase 2	-0.633204	0.0494166	0.198879	-1.04098	0.00219033	0.0100769	0.0487321	0.936574	0.999994	-0.359049	0.340244	0.973195
ENSMUSG00000040463	Mybbp1a	MYB binding protein (P160) 1a	0.449577	1.83445e-06	0.00421393	0.790357	2.58328e-10	1.74685e-08	0.107346	0.316612	0.999994	0.448127	1.17404e-05	0.0136528
ENSMUSG00000090100	Ttbk2	tau tubulin kinase 2	0.0320959	0.799103	0.999996	0.0965126	0.399341	0.999999	-0.0876231	0.644828	0.999994	-0.0232064	0.870362	0.999996
ENSMUSG00000038379	Ttk	Ttk protein kinase	-0.0823202	0.37752	0.999996	-0.285471	0.00279361	0.448804	0.0290763	0.866742	0.999994	-0.174074	0.0801596	0.999996
ENSMUSG00000032175	Tyk2	tyrosine kinase 2	-0.141277	0.14022	0.999996	0.266801	0.00585167	0.566947	-0.102578	0.496603	0.999994	0.305501	0.00477248	0.654078
ENSMUSG00000027298	Tyro3	TYRO3 protein tyrosine kinase 3	0.050063	0.581847	0.999996	0.62301	1.8448e-07	3.99736e-05	-0.133361	0.325963	0.999994	0.439587	9.97991e-05	0.0478801
ENSMUSG00000002550	Uck1	uridine-cytidine kinase 1	0.164234	0.0379491	0.999996	0.244913	0.00245017	0.726626	0.132191	0.275839	0.999994	0.21287	0.0132123	0.999996
ENSMUSG00000026558	Uck2	uridine-cytidine kinase 2	0.181421	0.00383386	0.999996	0.341412	4.15544e-06	0.0695306	0.00754978	0.951163	0.999994	0.167541	0.0106972	0.999996
ENSMUSG00000089917	Uckl1	uridine-cytidine kinase 1-like 1	0.280495	0.00141272	0.539993	0.333893	0.000174604	0.166209	0.149885	0.229078	0.999994	0.203283	0.0194878	0.999996
ENSMUSG00000026667	Uhmk1	U2AF homology motif (UHM) kinase 1	-0.234975	0.0138477	0.830769	-0.120959	0.182835	0.999999	-0.085307	0.565186	0.999994	0.0287099	0.801505	0.999996
ENSMUSG00000029512	Ulk1	unc-51 like kinase 1	-0.404885	0.000199154	0.0695002	-0.110009	0.230616	0.999999	-0.133837	0.352817	0.999994	0.161039	0.111443	0.999996
ENSMUSG00000004798	Ulk2	unc-51 like kinase 2	0.130506	0.213696	0.999996	0.556805	1.00918e-05	0.00155932	-0.0782986	0.656652	0.999994	0.348	0.00315598	0.415803
ENSMUSG00000032308	Ulk3	unc-51-like kinase 3	0.0298698	0.847585	0.999996	-0.141336	0.303395	0.999999	0.106359	0.644192	0.999994	-0.0648469	0.694582	0.999996
ENSMUSG00000040936	Ulk4	unc-51-like kinase 4	-0.0798194	0.522014	0.999996	0.111045	0.346904	0.999999	-0.0479463	0.828733	0.999994	0.142918	0.270032	0.999996
ENSMUSG00000021115	Vrk1	vaccinia related kinase 1	0.100397	0.106714	0.999996	-0.165358	0.00874906	0.999999	0.0996845	0.303528	0.999994	-0.166071	0.0157174	0.999996
ENSMUSG00000064090	Vrk2	vaccinia related kinase 2	0.215667	0.0781728	0.877243	0.295313	0.0151013	0.437441	0.0171146	0.946403	0.999994	0.0967603	0.472041	0.999996
ENSMUSG00000002205	Vrk3	vaccinia related kinase 3	-0.0102663	0.917876	0.999996	-0.179749	0.0351124	0.999999	0.0608405	0.673761	0.999994	-0.108643	0.248543	0.999996
ENSMUSG00000031016	Wee1	WEE 1 homolog 1 (S. pombe)	-0.269645	0.00322063	0.615101	-0.373958	0.000118723	0.0750833	0.00849804	0.959928	0.999994	-0.0958147	0.311557	0.999996
ENSMUSG00000045962	Wnk1	WNK lysine deficient protein kinase 1	-0.322618	0.00130051	0.318712	-0.189743	0.036175	0.999999	-0.243829	0.108558	0.999994	-0.110954	0.266586	0.999996
ENSMUSG00000035112	Wnk4	WNK lysine deficient protein kinase 4	-0.848931	8.0407e-07	2.51709e-05	-0.395045	0.00192385	0.114987	-0.295155	0.123503	0.999994	0.158731	0.243151	0.999996
ENSMUSG00000035769	Xylb	xylulokinase homolog (H. influenzae)	-0.0927964	0.471237	0.999996	0.154402	0.194285	0.999999	0.0793857	0.704495	0.999994	0.326584	0.0158689	0.607392
ENSMUSG00000014932	Yes1	YES proto-oncogene 1, Src family tyrosine kinase	0.0077462	0.952558	0.999996	-0.0584266	0.614532	0.999999	0.0269955	0.89792	0.999994	-0.0391772	0.772448	0.999996
ENSMUSG00000000078	Klf6	Kruppel-like factor 6	-0.340124	0.000191098	0.189634	-0.588957	1.28837e-07	4.80462e-05	-0.00747552	0.960803	0.999994	-0.256308	0.00455224	0.999996
ENSMUSG00000000134	Tfe3	transcription factor E3	-0.0697191	0.364108	0.999996	0.237679	0.00235279	0.784689	-0.0547564	0.66415	0.999994	0.252642	0.00343573	0.999996
ENSMUSG00000000247	Lhx2	LIM homeobox protein 2	-0.0200181	0.963224	0.999996	0.570741	0.137232	0.343564	-0.503493	0.411378	0.999994	0.087266	0.851702	0.999996
ENSMUSG00000000282	Mnt	max binding protein	0.0690946	0.51188	0.999996	0.274707	0.00798802	0.523308	-0.182306	0.249031	0.999994	0.0233063	0.853149	0.999996
ENSMUSG00000000567	Sox9	SRY (sex determining region Y)-box 9	0.139086	0.245271	0.999996	0.085304	0.476309	0.999999	0.0214923	0.928396	0.999994	-0.03229	0.826284	0.999996
ENSMUSG00000000690	Hoxb6	homeobox B6	-0.342644	0.000902882	0.234534	-0.346089	0.000660709	0.169218	-0.208451	0.157409	0.999994	-0.211895	0.038698	0.999996
ENSMUSG00000000731	Aire	autoimmune regulator (autoimmune polyendocrinopathy candidiasis ectodermal dystrophy)	-0.106939	0.810725	0.999996	-1.37418	0.00148163	0.00539393	0.523391	0.37375	0.999994	-0.743853	0.111028	0.452042
ENSMUSG00000000782	Tcf7	transcription factor 7, T cell specific	0.040508	0.705118	0.999996	0.0677256	0.498504	0.999999	-0.0277623	0.881984	0.999994	-0.000544706	0.996959	0.999996
ENSMUSG00000000823	Zfp512b	zinc finger protein 512B	-0.0308991	0.765985	0.999996	0.278879	0.00405993	0.492081	-0.0723449	0.646745	0.999994	0.237433	0.0214244	0.999996
ENSMUSG00000000938	Hoxa10	homeobox A10	-0.244979	0.00248404	0.795404	-0.443358	3.42987e-06	0.00527751	0.0164794	0.907713	0.999994	-0.1819	0.0293376	0.999996
ENSMUSG00000000942	Hoxa4	homeobox A4	0.408794	0.0623487	0.334445	0.282012	0.170923	0.577646	0.343801	0.313239	0.999994	0.217019	0.345518	0.999996
ENSMUSG00000001065	Zfp276	zinc finger protein (C2H2 type) 276	0.0394816	0.734322	0.999996	0.570698	9.1046e-06	0.00123523	-0.0402225	0.84008	0.999994	0.490994	0.00023845	0.0391758
ENSMUSG00000001520	Nrip2	nuclear receptor interacting protein 2	0.664799	1.07424e-07	1.76892e-05	1.00516	7.37439e-11	1.85369e-09	0.125792	0.329385	0.999994	0.466152	2.88196e-05	0.0169123
ENSMUSG00000001280	Sp1	trans-acting transcription factor 1	-0.189128	0.0901316	0.999996	-0.0432309	0.715322	0.999999	-0.0922503	0.610191	0.999994	0.0536467	0.684347	0.999996
ENSMUSG00000001288	Rarg	retinoic acid receptor, gamma	-0.242474	0.00277237	0.812047	0.0557125	0.461476	0.999999	-0.0680075	0.57236	0.999994	0.230179	0.00691895	0.999996
ENSMUSG00000001418	Glmp	glycosylated lysosomal membrane protein	-0.0692433	0.364657	0.999996	0.019756	0.810541	0.999999	0.0317668	0.816371	0.999994	0.120766	0.135728	0.999996
ENSMUSG00000001419	Mef2d	myocyte enhancer factor 2D	-0.304799	0.000705757	0.379702	-0.081784	0.306677	0.999999	-0.192734	0.136903	0.999994	0.0302816	0.756372	0.999996
ENSMUSG00000001497	Pax9	paired box 9	-0.292225	0.19898	0.63961	-0.0934292	0.696691	0.999999	-0.110965	0.777044	0.999994	0.0878308	0.750774	0.999996
ENSMUSG00000001504	Irx2	Iroquois homeobox 2	-0.178666	0.102345	0.999996	0.19094	0.0682482	0.950698	0.030542	0.881512	0.999994	0.400148	0.00171146	0.210782
ENSMUSG00000001517	Foxm1	forkhead box M1	-0.174178	0.0316658	0.999996	-0.350814	0.000117046	0.113724	-0.059535	0.653528	0.999994	-0.23617	0.00888167	0.999996
ENSMUSG00000001521	Tulp3	tubby-like protein 3	0.0540461	0.488382	0.999996	0.303301	0.000254736	0.302476	-0.0114574	0.940172	0.999994	0.237798	0.0051532	0.999996
ENSMUSG00000001911	Nfix	nuclear factor I/X	0.0555716	0.641224	0.999996	0.393641	0.00102984	0.0987898	-0.252031	0.160363	0.999994	0.0860377	0.491303	0.999996
ENSMUSG00000002057	Foxn1	forkhead box N1	-0.52836	0.134109	0.398151	-1.17315	0.00199594	0.00817304	0.155425	0.790617	0.999994	-0.48936	0.244707	0.795864
ENSMUSG00000002111	Spi1	spleen focus forming virus (SFFV) proviral integration oncogene	0.708011	0.00145073	0.0166952	0.240962	0.219529	0.694174	0.318042	0.326258	0.999994	-0.149006	0.498328	0.999996
ENSMUSG00000002147	Stat6	signal transducer and activator of transcription 6	-0.357464	0.000140477	0.134282	-0.165834	0.0348147	0.999999	-0.0292355	0.842694	0.999994	0.162394	0.0603457	0.999996
ENSMUSG00000002249	Tead3	TEA domain family member 3	-0.241944	0.0257315	0.773192	-0.00137953	0.991664	0.999999	-0.0715121	0.686975	0.999994	0.169052	0.141111	0.999996
ENSMUSG00000002250	Ppard	peroxisome proliferator activator receptor delta	-0.341841	0.00217536	0.269059	-0.0360326	0.742518	0.999999	-0.0846928	0.609414	0.999994	0.221115	0.0481907	0.999996
ENSMUSG00000001436	Slc19a1	solute carrier family 19 (folate transporter), member 1	0.518806	9.93007e-05	0.0118135	0.855375	6.42091e-08	1.98273e-06	0.132098	0.458799	0.999994	0.468667	0.000425328	0.0646365
ENSMUSG00000020990	Cdkl1	cyclin-dependent kinase-like 1 (CDC2-related kinase)	-1.11802	2.55417e-07	3.69397e-06	-0.783879	8.69556e-06	0.000194689	-0.185677	0.380245	0.999994	0.148462	0.367054	0.999996
ENSMUSG00000002345	Borcs8	BLOC-1 related complex subunit 8	0.168807	0.0855846	0.999996	-0.0762536	0.445952	0.999999	-0.073155	0.657632	0.999994	-0.318216	0.00464545	0.581265
ENSMUSG00000002393	Nr2f6	nuclear receptor subfamily 2, group F, member 6	-0.238636	0.0599089	0.773192	-0.00629862	0.964876	0.999999	-0.0690141	0.751458	0.999994	0.163323	0.23249	0.999996
ENSMUSG00000002578	Ikzf4	IKAROS family zinc finger 4	-0.286213	0.311367	0.737205	0.83902	0.00571883	0.0268048	-0.926895	0.0736476	0.999994	0.198338	0.534352	0.999996
ENSMUSG00000031337	Mtm1	X-linked myotubular myopathy gene 1	0.73564	4.76795e-05	0.00133968	1.06932	1.1505e-07	1.85359e-06	0.232562	0.32759	0.999994	0.566243	0.000722076	0.0376661
ENSMUSG00000002983	Relb	avian reticuloendotheliosis viral (v-rel) oncogene related B	0.169675	0.0403158	0.999996	0.412753	2.08278e-05	0.021224	-0.0397626	0.78384	0.999994	0.203315	0.0217026	0.999996
ENSMUSG00000002996	Hbp1	high mobility group box transcription factor 1	0.0535045	0.430527	0.999996	-0.0541176	0.410049	0.999999	0.267625	0.0240241	0.999994	0.160003	0.0262982	0.999996
ENSMUSG00000003032	Klf4	Kruppel-like factor 4 (gut)	-0.171783	0.138263	0.999996	-0.114836	0.313617	0.999999	0.021627	0.923415	0.999994	0.0785735	0.554616	0.999996
ENSMUSG00000028664	Ephb2	Eph receptor B2	-0.826827	2.76292e-05	0.000541834	-0.496169	0.00218693	0.0458805	-0.120032	0.625355	0.999994	0.210625	0.221728	0.999996
ENSMUSG00000003154	Foxj2	forkhead box J2	-0.0898359	0.434446	0.999996	0.372097	0.00146416	0.139685	-0.129082	0.460285	0.999994	0.332851	0.00746772	0.533575
ENSMUSG00000003184	Irf3	interferon regulatory factor 3	0.0051633	0.961907	0.999996	0.130051	0.149722	0.999999	0.174569	0.227646	0.999994	0.299457	0.00468566	0.690152
ENSMUSG00000003198	Zfp959	zinc finger protein 959	0.137536	0.450758	0.999996	-0.289747	0.0993817	0.518214	0.0656073	0.842694	0.999994	-0.361676	0.0611167	0.596227
ENSMUSG00000003382	Etv3	ets variant 3	-0.158333	0.0511532	0.999996	0.109811	0.161429	0.999999	-0.0488257	0.721967	0.999994	0.219319	0.0137387	0.999996
ENSMUSG00000003545	Fosb	FBJ osteosarcoma oncogene B	-0.555932	0.0529084	0.224475	-0.690247	0.0155805	0.0661445	0.0298407	0.956371	0.999994	-0.104475	0.771097	0.999996
ENSMUSG00000003847	Nfat5	nuclear factor of activated T cells 5	-0.390706	0.00114231	0.136697	-0.438554	0.000292338	0.0367886	-0.260466	0.13722	0.999994	-0.308315	0.011422	0.675097
ENSMUSG00000003923	Tfam	transcription factor A, mitochondrial	0.168896	0.0530004	0.999996	-0.110197	0.194295	0.999999	0.168031	0.209417	0.999994	-0.111062	0.237647	0.999996
ENSMUSG00000003929	Zfp81	zinc finger protein 81	-0.0400425	0.673385	0.999996	0.0899065	0.301264	0.999999	-0.0539746	0.720807	0.999994	0.0759744	0.437277	0.999996
ENSMUSG00000004040	Stat3	signal transducer and activator of transcription 3	-0.233533	0.00201471	0.894307	0.020752	0.78371	0.999999	-0.0630451	0.572186	0.999994	0.19124	0.0135441	0.999996
ENSMUSG00000004043	Stat5a	signal transducer and activator of transcription 5A	-0.129509	0.180734	0.999996	0.0542539	0.583125	0.999999	-0.035414	0.842961	0.999994	0.148349	0.153758	0.999996
ENSMUSG00000004071	Cdip1	cell death inducing Trp53 target 1	-0.0885183	0.208386	0.999996	-0.0119004	0.878904	0.999999	0.0309528	0.805661	0.999994	0.107571	0.154963	0.999996
ENSMUSG00000004151	Etv1	ets variant 1	-0.667275	0.105021	0.321831	-0.583379	0.157728	0.372744	-0.252005	0.708256	0.999994	-0.168109	0.750575	0.999996
ENSMUSG00000004231	Pax2	paired box 2	-0.279508	0.00509356	0.563473	-0.0181446	0.864432	0.999999	-0.241758	0.118714	0.999994	0.0196049	0.868447	0.999996
ENSMUSG00000004500	Zfp324	zinc finger protein 324	-0.192281	0.314904	0.908862	-0.0383783	0.853973	0.999999	0.0272574	0.943345	0.999994	0.18116	0.385496	0.999996
ENSMUSG00000004661	Arid3b	AT rich interactive domain 3B (BRIGHT-like)	-0.20938	0.274788	0.856094	-0.134451	0.48146	0.999999	-0.0318491	0.932741	0.999994	0.0430794	0.856708	0.999996
ENSMUSG00000004934	Pias4	protein inhibitor of activated STAT 4	-0.0744227	0.464743	0.999996	0.0894938	0.35931	0.999999	0.0289739	0.87609	0.999994	0.19289	0.0691733	0.999996
ENSMUSG00000005148	Klf5	Kruppel-like factor 5	-0.323893	0.00839281	0.379617	-0.472592	0.000298482	0.0243593	0.0436991	0.839468	0.999994	-0.105	0.425068	0.999996
ENSMUSG00000005267	Zfp287	zinc finger protein 287	0.347591	0.190081	0.56397	0.196806	0.446723	0.872245	0.231186	0.592592	0.999994	0.0804006	0.797687	0.999996
ENSMUSG00000048058	Ldlrad3	low density lipoprotein receptor class A domain containing 3	0.846796	0.000165912	0.00225343	1.17691	1.3385e-06	1.36923e-05	0.0742606	0.843579	0.999994	0.404375	0.0353486	0.439066
ENSMUSG00000038507	Parp12	poly (ADP-ribose) polymerase family, member 12	0.379244	9.18276e-06	0.0410608	0.707901	6.67405e-10	1.05918e-07	-0.0327522	0.778236	0.999994	0.295906	0.000332411	0.618476
ENSMUSG00000005621	Zfp592	zinc finger protein 592	-0.103204	0.209239	0.999996	0.0266296	0.764427	0.999999	-0.11964	0.347737	0.999994	0.0101931	0.923335	0.999996
ENSMUSG00000005698	Ctcf	CCCTC-binding factor	-0.0916003	0.242783	0.999996	-0.107067	0.161218	0.999999	0.00752845	0.96066	0.999994	-0.00793797	0.936848	0.999996
ENSMUSG00000022231	Sema5a	sema domain, seven thrombospondin repeats (type 1 and type 1-like), transmembrane domain (TM) and short cytoplasmic domain, (semaphorin) 5A	-0.976976	7.11615e-05	0.000869204	-0.649067	0.00217836	0.0192074	-0.323596	0.273516	0.999994	0.00431283	0.986879	0.999996
ENSMUSG00000005774	Rfx5	regulatory factor X, 5 (influences HLA class II expression)	-0.00288278	0.979429	0.999996	0.56186	4.79808e-06	0.000917639	-0.114924	0.46112	0.999994	0.449819	0.000280196	0.0665315
ENSMUSG00000028246	Faxc	failed axon connections homolog	0.468721	0.000246111	0.0326872	0.789472	1.8418e-07	7.84763e-06	0.0320073	0.890762	0.999994	0.352758	0.00355746	0.403746
ENSMUSG00000005893	Nr2c2	nuclear receptor subfamily 2, group C, member 2	-0.0903415	0.350354	0.999996	0.0258841	0.803746	0.999999	-0.0466991	0.778569	0.999994	0.0695265	0.52004	0.999996
ENSMUSG00000005897	Nr2c1	nuclear receptor subfamily 2, group C, member 1	0.1799	0.0126799	0.999996	0.139318	0.0432366	0.999999	-0.0136084	0.920343	0.999994	-0.0541902	0.488491	0.999996
ENSMUSG00000005917	Otx1	orthodenticle homeobox 1	0.0562932	0.820792	0.999996	0.284434	0.184698	0.581399	0.00928792	0.982538	0.999994	0.237429	0.320341	0.999996
ENSMUSG00000006215	Zbtb17	zinc finger and BTB domain containing 17	-0.0743487	0.481061	0.999996	0.105493	0.289599	0.999999	0.0546772	0.756241	0.999994	0.234519	0.0334125	0.999996
ENSMUSG00000033159	Cnppd1	cyclin Pas1/PHO80 domain containing 1	0.787265	1.29243e-09	8.18557e-08	1.10595	2.55872e-12	4.34008e-11	0.043008	0.726823	0.999994	0.361696	9.00378e-05	0.162146
ENSMUSG00000006587	Snai3	snail family zinc finger 3	0.153572	0.495998	0.999996	0.53908	0.00997056	0.0743507	0.182076	0.606263	0.999994	0.567584	0.0136628	0.162443
ENSMUSG00000006705	Pknox1	Pbx/knotted 1 homeobox	-0.0860178	0.327279	0.999996	-0.0707256	0.416544	0.999999	-0.0700799	0.622067	0.999994	-0.0547877	0.585664	0.999996
ENSMUSG00000006720	Zfp184	zinc finger protein 184 (Kruppel-like)	0.436475	0.00877742	0.161761	0.431183	0.00613088	0.115462	0.279868	0.260755	0.999994	0.274576	0.0952995	0.908484
ENSMUSG00000007216	Zfp775	zinc finger protein 775	0.318896	0.0278543	0.445673	0.275595	0.0458464	0.540342	0.140635	0.542195	0.999994	0.0973336	0.537561	0.999996
ENSMUSG00000007415	Gatad1	GATA zinc finger domain containing 1	0.0595372	0.463594	0.999996	-0.0470196	0.56205	0.999999	-0.079134	0.52954	0.999994	-0.185691	0.0310558	0.999996
ENSMUSG00000007805	Twist2	twist basic helix-loop-helix transcription factor 2	0.11628	0.478398	0.999996	0.0823132	0.607982	0.999999	0.181459	0.462172	0.999994	0.147492	0.391483	0.999996
ENSMUSG00000007812	Zfp655	zinc finger protein 655	-0.0175704	0.841372	0.999996	0.033928	0.681352	0.999999	0.0659143	0.60503	0.999994	0.117413	0.16451	0.999996
ENSMUSG00000023809	Rps6ka2	ribosomal protein S6 kinase, polypeptide 2	0.575148	8.065e-05	0.00606706	0.889635	1.53459e-07	3.72996e-06	-0.0373086	0.875697	0.999994	0.277178	0.0289707	0.875566
ENSMUSG00000078622	Ccdc47	coiled-coil domain containing 47	0.361494	2.90537e-06	0.0459832	0.671963	1.96365e-10	4.95426e-08	-0.0122376	0.911943	0.999994	0.298231	9.73079e-05	0.546227
ENSMUSG00000007880	Arid1a	AT rich interactive domain 1A (SWI-like)	-0.342793	0.00189195	0.260159	-0.202649	0.0439844	0.914137	-0.243904	0.136675	0.999994	-0.10376	0.356448	0.999996
ENSMUSG00000008206	Cers4	ceramide synthase 4	0.3641	0.0752723	0.411174	0.520379	0.00972474	0.0800572	0.115396	0.749207	0.999994	0.271675	0.199643	0.953492
ENSMUSG00000008393	Carhsp1	calcium regulated heat stable protein 1	-0.229205	0.000329105	0.981497	-0.242457	0.000122765	0.801295	0.00884174	0.937259	0.999994	-0.00441025	0.95138	0.999996
ENSMUSG00000008398	Elk3	ELK3, member of ETS oncogene family	-0.0369097	0.722677	0.999996	0.114527	0.225637	0.999999	-0.139194	0.351725	0.999994	0.0122427	0.921121	0.999996
ENSMUSG00000008575	Nfib	nuclear factor I/B	-0.321531	0.0730637	0.490867	-0.517313	0.00631554	0.0614745	-0.125558	0.667831	0.999994	-0.32134	0.10027	0.755722
ENSMUSG00000008976	Gabpa	GA repeat binding protein, alpha	-0.180274	0.036609	0.999996	-0.308968	0.00076773	0.302489	-0.000569258	0.997043	0.999994	-0.129264	0.16185	0.999996
ENSMUSG00000009406	Elk1	ELK1, member of ETS oncogene family	0.0948417	0.421998	0.999996	0.305888	0.00814052	0.380224	-0.0155869	0.948153	0.999994	0.195459	0.109037	0.999996
ENSMUSG00000009733	Tfcp2	transcription factor CP2	0.124956	0.134566	0.999996	0.326194	0.000316065	0.207022	0.0745387	0.581379	0.999994	0.275777	0.00349411	0.856305
ENSMUSG00000009739	Pou6f1	POU domain, class 6, transcription factor 1	-0.0872162	0.543252	0.999996	0.438992	0.0025122	0.0786592	-0.315156	0.156354	0.999994	0.211052	0.152655	0.999996
ENSMUSG00000009741	Ubp1	upstream binding protein 1	-0.0830164	0.415827	0.999996	0.0730861	0.464375	0.999999	-0.0245798	0.89498	0.999994	0.131523	0.221699	0.999996
ENSMUSG00000011267	Zfp296	zinc finger protein 296	0.520615	0.00441311	0.0746867	0.392698	0.0186388	0.207604	0.300843	0.265711	0.999994	0.172926	0.340082	0.999996
ENSMUSG00000011427	Zfp790	zinc finger protein 790	-0.0864818	0.487501	0.999996	0.0326969	0.804347	0.999999	-0.110039	0.569164	0.999994	0.00913974	0.953326	0.999996
ENSMUSG00000029561	Oasl2	2'-5' oligoadenylate synthetase-like 2	0.525531	4.06017e-06	0.00175245	0.834972	3.17869e-09	1.39806e-07	0.00691246	0.966885	0.999994	0.316354	0.00174059	0.540994
ENSMUSG00000012640	Zfp715	zinc finger protein 715	-0.317204	0.0096611	0.408986	-0.336612	0.00540362	0.264286	-0.0673881	0.737807	0.999994	-0.0867963	0.52444	0.999996
ENSMUSG00000028883	Sema3a	sema domain, immunoglobulin domain (Ig), short basic domain, secreted, (semaphorin) 3A	0.948357	1.16343e-05	0.000194163	1.25698	1.31807e-07	1.30659e-06	-0.0906211	0.774381	0.999994	0.218006	0.197206	0.999996
ENSMUSG00000013419	Zfp651	zinc finger protein 651	-0.212125	0.180373	0.85342	0.832353	9.37754e-06	0.000170207	-0.216468	0.37836	0.999994	0.828011	7.05222e-05	0.00196707
ENSMUSG00000014039	Prdm15	PR domain containing 15	0.0259202	0.784307	0.999996	0.318298	0.000549957	0.252416	-0.00882557	0.959403	0.999994	0.283552	0.00361224	0.793512
ENSMUSG00000014303	Glis2	GLIS family zinc finger 2	-0.360898	0.000118032	0.122246	-0.365647	6.51218e-05	0.0752997	-0.0986871	0.415301	0.999994	-0.103436	0.232928	0.999996
ENSMUSG00000014592	Camta1	calmodulin binding transcription activator 1	0.150458	0.184798	0.999996	0.0156501	0.90532	0.999999	-0.13828	0.440074	0.999994	-0.273088	0.0279232	0.892844
ENSMUSG00000014704	Hoxa2	homeobox A2	0.230608	0.315847	0.81341	0.0144823	0.958021	0.999999	-0.24306	0.516065	0.999994	-0.459185	0.0641823	0.434484
ENSMUSG00000014859	E2f4	E2F transcription factor 4	0.026913	0.670553	0.999996	0.0519538	0.375319	0.999999	-0.0139951	0.899728	0.999994	0.0110456	0.881267	0.999996
ENSMUSG00000015217	Hmgb3	high mobility group box 3	-0.0660086	0.363245	0.999996	-0.56567	6.5488e-08	4.12086e-05	0.087071	0.428392	0.999994	-0.412591	4.15424e-05	0.0497675
ENSMUSG00000015461	Atf6b	activating transcription factor 6 beta	0.287838	0.00323727	0.507612	0.412347	7.46258e-05	0.033618	0.095321	0.516065	0.999994	0.219829	0.025735	0.999996
ENSMUSG00000015501	Hivep2	human immunodeficiency virus type I enhancer binding protein 2	-0.437688	0.00290107	0.111242	-0.354731	0.0106732	0.24612	-0.223567	0.287155	0.999994	-0.140609	0.35392	0.999996
ENSMUSG00000015522	Arnt	aryl hydrocarbon receptor nuclear translocator	0.253154	0.00348777	0.731103	0.276935	0.00127741	0.490669	0.112229	0.374829	0.999994	0.13601	0.118175	0.999996
ENSMUSG00000015605	Srf	serum response factor	-0.166144	0.40838	0.991898	0.00680797	0.976123	0.999999	0.00595432	0.987059	0.999994	0.178906	0.411519	0.999996
ENSMUSG00000055322	Tns1	tensin 1	-1.25503	1.1222e-06	8.80301e-06	-0.946725	1.08052e-05	0.000117152	-0.403346	0.121592	0.999994	-0.0950366	0.604818	0.999996
ENSMUSG00000015697	Setdb1	SET domain, bifurcated 1	-0.0779832	0.25802	0.999996	0.0936686	0.161735	0.999999	-0.0358376	0.763223	0.999994	0.135814	0.0658974	0.999996
ENSMUSG00000015709	Arnt2	aryl hydrocarbon receptor nuclear translocator 2	0.554719	0.0486316	0.213531	0.981468	0.000950156	0.00566768	-0.143297	0.779593	0.999994	0.283451	0.327542	0.999996
ENSMUSG00000017830	Dhx58	DEXH (Asp-Glu-X-His) box polypeptide 58	0.521827	6.12661e-06	0.00235865	0.823958	4.36829e-09	2.14232e-07	0.126192	0.360748	0.999994	0.428323	0.000138981	0.0651779
ENSMUSG00000015839	Nfe2l2	nuclear factor, erythroid derived 2, like 2	-0.0345544	0.594416	0.999996	-0.120973	0.0452986	0.999999	0.144643	0.14079	0.999994	0.0582244	0.39237	0.999996
ENSMUSG00000015846	Rxra	retinoid X receptor alpha	-0.12066	0.230751	0.999996	0.157354	0.107196	0.999999	-0.0780632	0.637371	0.999994	0.19995	0.0638107	0.999996
ENSMUSG00000015882	Lcorl	ligand dependent nuclear receptor corepressor-like	0.0299354	0.829283	0.999996	-0.0955795	0.447983	0.999999	-0.0408646	0.86269	0.999994	-0.16638	0.219146	0.999996
ENSMUSG00000015942	Gtf2ird2	GTF2I repeat domain containing 2	-0.209212	0.0786078	0.910529	0.461476	0.000318876	0.0293827	-0.163596	0.373499	0.999994	0.507091	0.000472567	0.0475621
ENSMUSG00000016477	E2f3	E2F transcription factor 3	-0.114804	0.253862	0.999996	-0.191802	0.0516027	0.966717	-0.0196949	0.91824	0.999994	-0.0966926	0.384797	0.999996
ENSMUSG00000020644	Id2	inhibitor of DNA binding 2	-0.522244	0.000155887	0.0137191	-1.59109	5.31889e-11	2.97475e-10	0.214223	0.231367	0.999994	-0.85462	5.99182e-06	0.000155654
ENSMUSG00000016831	Tox4	TOX high mobility group box family member 4	0.0429091	0.559199	0.999996	0.00820886	0.917883	0.999999	0.0620677	0.58437	0.999994	0.0273674	0.746263	0.999996
ENSMUSG00000017667	Zfp334	zinc finger protein 334	-0.156657	0.159676	0.999996	0.0233921	0.84984	0.999999	-0.0409212	0.842694	0.999994	0.139127	0.250181	0.999996
ENSMUSG00000017724	Etv4	ets variant 4	-0.0656652	0.549444	0.999996	-0.342946	0.00185624	0.209334	0.0813467	0.636023	0.999994	-0.195934	0.0848339	0.999996
ENSMUSG00000017801	Mlx	MAX-like protein X	0.278671	0.001137	0.548116	0.233906	0.00338653	0.80578	0.143102	0.234277	0.999994	0.0983375	0.238468	0.999996
ENSMUSG00000017861	Mybl2	myeloblastosis oncogene-like 2	-0.392554	0.000122275	0.0720476	-0.738901	2.32629e-08	1.83572e-06	0.00538479	0.973124	0.999994	-0.340962	0.00125528	0.389633
ENSMUSG00000017950	Hnf4a	hepatic nuclear factor 4, alpha	-0.892429	0.448204	0.804477	-0.60558	0.541865	0.872272	0.836972	0.608877	0.999994	1.12382	0.362331	0.914098
ENSMUSG00000018143	Mafk	v-maf musculoaponeurotic fibrosarcoma oncogene family, protein K (avian)	0.0945532	0.247625	0.999996	0.319515	0.000333259	0.234329	-0.0441091	0.755735	0.999994	0.180853	0.0385647	0.999996
ENSMUSG00000018347	Zkscan6	zinc finger with KRAB and SCAN domains 6	-0.0264228	0.780267	0.999996	0.222386	0.0096823	0.860293	-0.0172275	0.917482	0.999994	0.231582	0.0139793	0.999996
ENSMUSG00000018377	Vezf1	vascular endothelial zinc finger 1	-0.0749722	0.338472	0.999996	-0.06396	0.408663	0.999999	-0.00242236	0.986967	0.999994	0.0085898	0.930757	0.999996
ENSMUSG00000018501	Ncor1	nuclear receptor co-repressor 1	-0.108858	0.195414	0.999996	0.10482	0.204128	0.999999	-0.108502	0.40467	0.999994	0.105176	0.250181	0.999996
ENSMUSG00000018554	Ybx2	Y box protein 2	-0.178239	0.341552	0.950835	-0.439698	0.0190113	0.15755	-0.0222068	0.952829	0.999994	-0.283666	0.164684	0.906695
ENSMUSG00000018651	Tada2a	transcriptional adaptor 2A	0.181134	0.0224265	0.999996	0.0577615	0.458806	0.999999	0.0984679	0.413116	0.999994	-0.0249047	0.791812	0.999996
ENSMUSG00000018678	Sp2	Sp2 transcription factor	-0.116277	0.393514	0.999996	0.00868427	0.955044	0.999999	0.00965318	0.969162	0.999994	0.134614	0.358173	0.999996
ENSMUSG00000018750	Zbtb4	zinc finger and BTB domain containing 4	-0.232473	0.050206	0.806471	0.127608	0.274218	0.999999	-0.247646	0.177576	0.999994	0.112434	0.38945	0.999996
ENSMUSG00000018899	Irf1	interferon regulatory factor 1	-0.0341771	0.68377	0.999996	0.0633636	0.410911	0.999999	0.0791898	0.521573	0.999994	0.176731	0.0353654	0.999996
ENSMUSG00000024423	Impact	impact, RWD domain protein	0.457171	1.08436e-05	0.00892049	0.758771	4.16609e-09	3.42586e-07	0.0343017	0.819926	0.999994	0.335902	0.000535397	0.362506
ENSMUSG00000019256	Ahr	aryl-hydrocarbon receptor	-0.344765	0.0586282	0.423392	-0.203342	0.248654	0.814461	-0.0962356	0.754984	0.999994	0.0451871	0.839594	0.999996
ENSMUSG00000019338	Zfp687	zinc finger protein 687	-0.339969	0.00154036	0.26173	-0.0523401	0.606707	0.999999	-0.110597	0.470741	0.999994	0.177031	0.0960648	0.999996
ENSMUSG00000019564	Arid3a	AT rich interactive domain 3A (BRIGHT-like)	-0.292865	0.0347522	0.541014	0.119863	0.370859	0.999999	-0.0742696	0.752814	0.999994	0.338459	0.0233775	0.58466
ENSMUSG00000019768	Esr1	estrogen receptor 1 (alpha)	0.324911	0.360356	0.762409	0.502867	0.129774	0.338278	0.0953858	0.887089	0.999994	0.273341	0.46249	0.999996
ENSMUSG00000019817	Plagl1	pleiomorphic adenoma gene-like 1	-0.322371	0.072286	0.488344	0.314266	0.0744192	0.438739	-0.387461	0.167489	0.999994	0.249176	0.19624	0.999996
ENSMUSG00000019826	Zbtb24	zinc finger and BTB domain containing 24	0.176749	0.0605526	0.999996	0.466212	2.18141e-05	0.00854288	0.0189676	0.916993	0.999994	0.308431	0.00344295	0.620416
ENSMUSG00000019878	Hsf2	heat shock factor 2	0.0684113	0.560362	0.999996	0.215659	0.0503346	0.829559	-0.0849704	0.651341	0.999994	0.0622773	0.633163	0.999996
ENSMUSG00000006310	Zbtb32	zinc finger and BTB domain containing 32	-0.983293	0.000757239	0.00648972	-1.57234	3.45951e-06	1.79498e-05	0.134844	0.749443	0.999994	-0.454204	0.144553	0.618476
ENSMUSG00000019947	Arid5b	AT rich interactive domain 5B (MRF1-like)	-0.395965	0.000353531	0.0938296	-0.335722	0.00128022	0.217773	-0.253183	0.112222	0.999994	-0.19294	0.0705435	0.999996
ENSMUSG00000019982	Myb	myeloblastosis oncogene	-0.491897	0.02602	0.182875	-0.417006	0.054803	0.255071	-0.236439	0.481271	0.999994	-0.161547	0.527635	0.999996
ENSMUSG00000020137	Thap2	THAP domain containing, apoptosis associated protein 2	-0.00206103	0.990061	0.999996	0.38456	0.00957918	0.185978	-0.191699	0.401982	0.999994	0.194922	0.213284	0.999996
ENSMUSG00000020160	Meis1	Meis homeobox 1	-0.0160673	0.949518	0.999996	0.454641	0.0306037	0.175811	-0.0850512	0.833016	0.999994	0.385658	0.0908861	0.596227
ENSMUSG00000020167	Tcf3	transcription factor 3	0.0681773	0.425591	0.999996	0.157444	0.0547592	0.999999	-0.0361596	0.811577	0.999994	0.0531076	0.580735	0.999996
ENSMUSG00000040435	Ppp1r15a	protein phosphatase 1, regulatory subunit 15A	1.13456	3.10912e-12	5.93655e-11	1.42828	2.72697e-14	1.65834e-13	0.219888	0.0608326	0.999994	0.513611	1.46302e-06	0.00106119
ENSMUSG00000020232	Hmg20b	high mobility group 20B	-0.131806	0.0773669	0.999996	-0.0223895	0.781585	0.999999	-0.00580888	0.967289	0.999994	0.103608	0.198081	0.999996
ENSMUSG00000020248	Nfyb	nuclear transcription factor-Y beta	0.292827	0.000275486	0.426064	0.0877515	0.199572	0.999999	0.119409	0.273351	0.999994	-0.0856667	0.256541	0.999996
ENSMUSG00000020275	Rel	reticuloendotheliosis oncogene	-0.256434	0.0435306	0.694116	-0.331724	0.00991282	0.302299	-0.119677	0.550103	0.999994	-0.194967	0.159297	0.999996
ENSMUSG00000020335	Zfp354b	zinc finger protein 354B	1.32597	0.000334879	0.00210799	0.625169	0.0425894	0.143262	0.477216	0.375121	0.999994	-0.223583	0.495843	0.999996
ENSMUSG00000020364	Zfp354a	zinc finger protein 354A	0.339759	0.0180395	0.367602	0.342218	0.0119541	0.281891	0.241944	0.266375	0.999994	0.244403	0.0922623	0.999996
ENSMUSG00000020420	Zfp607a	zinc finger protein 607A	-0.00836355	0.975452	0.999996	0.332634	0.162028	0.485354	-0.294361	0.438869	0.999994	0.0466356	0.876271	0.999996
ENSMUSG00000020453	Patz1	POZ (BTB) and AT hook containing zinc finger 1	-0.188746	0.0470911	0.999996	0.254762	0.00749305	0.644141	-0.134554	0.356315	0.999994	0.308954	0.0041019	0.624905
ENSMUSG00000078920	Ifi47	interferon gamma inducible protein 47	0.626472	8.63755e-05	0.00416466	0.919312	4.42837e-07	8.79976e-06	-0.190204	0.381347	0.999994	0.102636	0.473073	0.999996
ENSMUSG00000020484	Xbp1	X-box binding protein 1	-0.151376	0.0647875	0.999996	0.146887	0.0635564	0.999999	0.0439681	0.75538	0.999994	0.342231	0.000607612	0.339894
ENSMUSG00000020491	2810021J22Rik	RIKEN cDNA 2810021J22 gene	0.377224	0.00928889	0.248193	0.59925	0.000102705	0.00418607	0.106239	0.652857	0.999994	0.328265	0.0244638	0.625357
ENSMUSG00000020538	Srebf1	sterol regulatory element binding transcription factor 1	-0.301854	0.0139834	0.479463	0.00790939	0.953953	0.999999	-0.125224	0.503114	0.999994	0.184539	0.149878	0.999996
ENSMUSG00000000223	Drp2	dystrophin related protein 2	1.11926	0.000408571	0.00323618	1.41037	3.03276e-05	0.000163377	-0.308387	0.540283	0.999994	-0.0172697	0.995842	0.999996
ENSMUSG00000020653	Klf11	Kruppel-like factor 11	0.0110286	0.931352	0.999996	0.186448	0.0835597	0.961083	-0.0162772	0.942984	0.999994	0.159142	0.17832	0.999996
ENSMUSG00000020656	Grhl1	grainyhead like transcription factor 1	0.159602	0.230286	0.999996	0.428145	0.00195266	0.082093	-0.094623	0.674126	0.999994	0.17392	0.215844	0.999996
ENSMUSG00000007872	Id3	inhibitor of DNA binding 3	-0.495031	0.000119714	0.0169461	-1.55684	1.70828e-11	1.05291e-10	0.249937	0.139078	0.999994	-0.811877	6.34923e-06	0.000213099
ENSMUSG00000020875	Hoxb9	homeobox B9	0.185231	0.00302568	0.999996	0.135482	0.0202821	0.999999	-0.0724643	0.423374	0.999994	-0.122214	0.0528433	0.999996
ENSMUSG00000020889	Nr1d1	nuclear receptor subfamily 1, group D, member 1	0.0827521	0.81497	0.999996	-0.104348	0.757816	0.999999	0.266707	0.60707	0.999994	0.0796077	0.839076	0.999996
ENSMUSG00000020919	Stat5b	signal transducer and activator of transcription 5B	0.0303296	0.73354	0.999996	0.316552	0.000378582	0.249337	-0.0111346	0.947511	0.999994	0.275087	0.00331645	0.857779
ENSMUSG00000020923	Ubtf	upstream binding transcription factor, RNA polymerase I	0.0436589	0.555126	0.999996	0.259253	0.000663587	0.624237	0.0155097	0.908981	0.999994	0.231104	0.00422335	0.999996
ENSMUSG00000000184	Ccnd2	cyclin D2	1.73315	0.00240138	0.00964217	2.02178	5.59253e-05	0.000186608	1.01033	0.247914	0.999994	1.29896	0.00491654	0.0353766
ENSMUSG00000046027	Stard5	StAR-related lipid transfer (START) domain containing 5	1.37689	1.65311e-08	1.39563e-07	1.66482	1.74525e-10	1.02322e-09	0.242581	0.328326	0.999994	0.530505	0.000813576	0.0519474
ENSMUSG00000021264	Yy1	YY1 transcription factor	-0.220057	0.00549396	0.965549	-0.136413	0.0645733	0.999999	-0.00676293	0.963363	0.999994	0.0768809	0.35392	0.999996
ENSMUSG00000021318	Gli3	GLI-Kruppel family member GLI3	-0.291837	0.0226324	0.533577	-0.15869	0.203846	0.999999	-0.272735	0.167035	0.999994	-0.139588	0.316416	0.999996
ENSMUSG00000021327	Zkscan3	zinc finger with KRAB and SCAN domains 3	0.0161069	0.867909	0.999996	0.0792219	0.352979	0.999999	0.029341	0.856556	0.999994	0.092456	0.325563	0.999996
ENSMUSG00000021359	Tfap2a	transcription factor AP-2, alpha	-0.298347	0.00223776	0.444707	-0.38992	0.000163425	0.06277	-0.201709	0.157756	0.999994	-0.293282	0.00535846	0.736467
ENSMUSG00000064345	mt-Nd2	mitochondrially encoded NADH dehydrogenase 2	1.48262	3.70544e-10	2.68122e-09	1.76468	9.5581e-12	4.34008e-11	-0.0584643	0.780511	0.999994	0.223596	0.0832163	0.999996
ENSMUSG00000031853	Map3k21	mitogen-activated protein kinase kinase kinase 21	-0.945981	2.05293e-07	4.62532e-06	-0.664861	7.87141e-06	0.000418746	-0.201953	0.260976	0.999994	0.0791662	0.580911	0.999996
ENSMUSG00000021311	Mtr	5-methyltetrahydrofolate-homocysteine methyltransferase	0.658722	1.07086e-05	0.000757673	0.938411	3.7278e-08	8.82088e-07	-0.00855942	0.970083	0.999994	0.271129	0.0248932	0.902762
ENSMUSG00000021510	Zfp729a	zinc finger protein 729a	-0.0782907	0.457831	0.999996	0.0797189	0.433782	0.999999	-0.0362087	0.849311	0.999994	0.121801	0.271759	0.999996
ENSMUSG00000021514	Zfp369	zinc finger protein 369	-0.176427	0.080647	0.999996	-0.0153662	0.893668	0.999999	-0.269723	0.109756	0.999994	-0.108662	0.331044	0.999996
ENSMUSG00000021540	Smad5	SMAD family member 5	-0.0648668	0.435942	0.999996	-0.0292536	0.736864	0.999999	-0.0867839	0.497987	0.999994	-0.0511707	0.58536	0.999996
ENSMUSG00000021775	Nr1d2	nuclear receptor subfamily 1, group D, member 2	0.0855557	0.45221	0.999996	0.255759	0.0194728	0.631916	0.0827337	0.652964	0.999994	0.252937	0.0341475	0.999996
ENSMUSG00000021972	Hmbox1	homeobox containing 1	-0.165395	0.093028	0.999996	-0.0481499	0.642642	0.999999	-0.232635	0.14079	0.999994	-0.11539	0.286177	0.999996
ENSMUSG00000018983	E2f2	E2F transcription factor 2	-1.08236	7.52234e-07	1.28868e-05	-1.38387	1.92149e-08	1.62629e-07	-0.231393	0.307349	0.999994	-0.532899	0.00593668	0.127861
ENSMUSG00000022205	Sub1	SUB1 homolog (S. cerevisiae)	0.204861	0.191118	0.885211	-0.554936	0.00155801	0.0230751	0.00566781	0.985067	0.999994	-0.75413	0.000432995	0.00881499
ENSMUSG00000022228	Zscan26	zinc finger and SCAN domain containing 26	0.201521	0.00878633	0.999996	0.396463	9.94515e-06	0.0223756	-0.00393819	0.976684	0.999994	0.191004	0.017552	0.999996
ENSMUSG00000022286	Grhl2	grainyhead like transcription factor 2	-0.421444	0.000219538	0.056976	-0.260255	0.00890679	0.607482	-0.0891239	0.569164	0.999994	0.0720647	0.521555	0.999996
ENSMUSG00000022306	Zfpm2	zinc finger protein, multitype 2	0.222133	0.154877	0.819287	0.470124	0.00380425	0.0699308	-0.0663695	0.817745	0.999994	0.181621	0.276579	0.999996
ENSMUSG00000022335	Zfat	zinc finger and AT hook domain containing	0.0146529	0.891674	0.999996	0.364148	0.000341949	0.113679	-0.0174475	0.925281	0.999994	0.332048	0.0021512	0.460647
ENSMUSG00000022346	Myc	myelocytomatosis oncogene	0.432099	6.81899e-07	0.00369978	0.302629	2.75377e-05	0.253212	0.132834	0.167219	0.999994	0.00336403	0.966311	0.999996
ENSMUSG00000022361	Zhx1	zinc fingers and homeoboxes 1	-0.236016	0.0118531	0.827793	-0.265509	0.00434621	0.574488	-0.00717566	0.966885	0.999994	-0.036668	0.739569	0.999996
ENSMUSG00000022383	Ppara	peroxisome proliferator activated receptor alpha	0.0454831	0.912889	0.999996	0.374517	0.278983	0.591424	-0.0175758	0.978681	0.999994	0.311458	0.420952	0.999996
ENSMUSG00000022389	Tef	thyrotroph embryonic factor	0.132154	0.145878	0.999996	0.485284	9.51472e-06	0.0040905	0.0519167	0.742926	0.999994	0.405047	0.00032272	0.122447
ENSMUSG00000022463	Srebf2	sterol regulatory element binding factor 2	-0.44239	6.8049e-05	0.0263664	-0.241558	0.00947377	0.726585	-0.127101	0.37161	0.999994	0.0737306	0.476838	0.999996
ENSMUSG00000022479	Vdr	vitamin D (1,25-dihydroxyvitamin D3) receptor	-0.522165	0.350951	0.710486	-1.29868	0.00903365	0.0267457	0.983301	0.188196	0.999994	0.20679	0.760824	0.999996
ENSMUSG00000022500	Litaf	LPS-induced TN factor	-0.175374	0.00629338	0.999996	-0.449503	1.72969e-07	0.000926931	0.0498649	0.617403	0.999994	-0.224264	0.00191847	0.999996
ENSMUSG00000022508	Bcl6	B cell leukemia/lymphoma 6	-0.384046	0.000390579	0.114123	-0.290014	0.00310558	0.426966	-0.00563261	0.973859	0.999994	0.0883998	0.40752	0.999996
ENSMUSG00000022526	Zfp251	zinc finger protein 251	-0.0507766	0.684891	0.999996	0.458919	0.000298482	0.0294815	-0.162618	0.368435	0.999994	0.347078	0.00716322	0.46659
ENSMUSG00000022528	Hes1	hes family bHLH transcription factor 1	0.00285862	0.975859	0.999996	-0.288337	0.00120818	0.417436	0.129122	0.32019	0.999994	-0.162074	0.0745988	0.999996
ENSMUSG00000022529	Zfp263	zinc finger protein 263	-0.031903	0.7086	0.999996	0.200935	0.0105639	0.999999	0.0652304	0.610427	0.999994	0.298069	0.00136039	0.6538
ENSMUSG00000022556	Hsf1	heat shock factor 1	0.00726531	0.934735	0.999996	0.18816	0.0146029	0.999999	0.0194464	0.892557	0.999994	0.200341	0.0180932	0.999996
ENSMUSG00000022601	Zbtb11	zinc finger and BTB domain containing 11	-0.299422	0.00124034	0.423419	-0.153464	0.0632256	0.999999	-0.073951	0.585037	0.999994	0.0720066	0.447378	0.999996
ENSMUSG00000022641	Bbx	bobby sox HMG box containing	-0.165636	0.176301	0.999996	-0.0694146	0.583575	0.999999	-0.209236	0.270919	0.999994	-0.113015	0.407415	0.999996
ENSMUSG00000022708	Zbtb20	zinc finger and BTB domain containing 20	-0.44767	0.00237888	0.0947271	-0.582844	0.000194665	0.00656074	-0.246907	0.234277	0.999994	-0.382081	0.013468	0.401406
ENSMUSG00000022760	Thap7	THAP domain containing 7	0.231462	0.0109001	0.861877	0.22512	0.0107462	0.835041	0.0037233	0.982224	0.999994	-0.00261833	0.981533	0.999996
ENSMUSG00000022811	Zfp148	zinc finger protein 148	-0.00446011	0.962536	0.999996	0.115741	0.152336	0.999999	-0.0406373	0.778236	0.999994	0.0795637	0.383125	0.999996
ENSMUSG00000022895	Ets2	E26 avian leukemia oncogene 2, 3' domain	-0.339467	0.000155114	0.185746	-0.245201	0.00218261	0.726585	-0.0536259	0.674123	0.999994	0.0406396	0.653001	0.999996
ENSMUSG00000028059	Arhgef2	rho/rac guanine nucleotide exchange factor (GEF) 2	0.494893	5.85493e-07	0.000841667	0.774143	3.7637e-10	3.10551e-08	-0.0469512	0.686639	0.999994	0.232299	0.00348186	0.999996
ENSMUSG00000023021	Cers5	ceramide synthase 5	-0.0088136	0.904383	0.999996	0.0442009	0.493637	0.999999	0.000357688	0.99759	0.999994	0.0533722	0.454314	0.999996
ENSMUSG00000023027	Atf1	activating transcription factor 1	0.116875	0.0941196	0.999996	-0.200172	0.00520331	0.999999	0.0800686	0.462717	0.999994	-0.236978	0.00332399	0.999996
ENSMUSG00000023034	Nr4a1	nuclear receptor subfamily 4, group A, member 1	-0.616578	5.9e-05	0.00351767	-0.273991	0.0277445	0.540342	-0.159482	0.404244	0.999994	0.183105	0.18748	0.999996
ENSMUSG00000023079	Gtf2ird1	general transcription factor II I repeat domain-containing 1	-0.016396	0.815983	0.999996	0.206578	0.00184508	0.999999	0.00931545	0.942758	0.999994	0.232289	0.00181683	0.999996
ENSMUSG00000023284	Zfp605	zinc finger protein 605	0.326396	0.00608046	0.360475	0.251523	0.0247553	0.652004	0.044417	0.834489	0.999994	-0.0304556	0.82618	0.999996
ENSMUSG00000023411	Nfatc4	nuclear factor of activated T cells, cytoplasmic, calcineurin dependent 4	0.0742114	0.730427	0.999996	0.737402	0.000637538	0.00631356	-0.363562	0.249687	0.999994	0.299628	0.15159	0.857766
ENSMUSG00000023781	Hes7	hes family bHLH transcription factor 7	-0.054248	0.898285	0.999996	-0.348641	0.352641	0.689697	0.00304581	0.996451	0.999994	-0.291347	0.494747	0.999996
ENSMUSG00000023882	Zfp54	zinc finger protein 54	-0.237046	0.165442	0.764663	-0.194743	0.243918	0.841998	-0.0105633	0.973124	0.999994	0.031739	0.884266	0.999996
ENSMUSG00000023892	Zfp51	zinc finger protein 51	0.320005	0.015546	0.418212	0.282872	0.0241982	0.498725	0.194199	0.333335	0.999994	0.157065	0.250113	0.999996
ENSMUSG00000023932	Cdc5l	cell division cycle 5-like (S. pombe)	0.0383207	0.586444	0.999996	-0.0152121	0.837009	0.999999	0.149524	0.158296	0.999994	0.0959915	0.18175	0.999996
ENSMUSG00000023990	Tfeb	transcription factor EB	0.0427478	0.717784	0.999996	0.0541007	0.633327	0.999999	-0.0115885	0.958137	0.999994	-0.000235558	0.998691	0.999996
ENSMUSG00000023991	Foxp4	forkhead box P4	-0.222196	0.007962	0.934852	-0.136189	0.0831556	0.999999	-0.0620027	0.638921	0.999994	0.0240049	0.809755	0.999996
ENSMUSG00000023994	Nfya	nuclear transcription factor-Y alpha	0.0295155	0.743436	0.999996	0.15001	0.0640446	0.999999	-0.0315748	0.836444	0.999994	0.0889194	0.325025	0.999996
ENSMUSG00000024050	Wiz	widely-interspaced zinc finger motifs	-0.0247123	0.80649	0.999996	0.286004	0.0025552	0.444497	-0.179707	0.203752	0.999994	0.131009	0.179482	0.999996
ENSMUSG00000024137	E4f1	E4F transcription factor 1	0.141886	0.193535	0.999996	0.186088	0.0741644	0.972067	0.256033	0.14079	0.999994	0.300236	0.0114994	0.72249
ENSMUSG00000024206	Rfx2	regulatory factor X, 2 (influences HLA class II expression)	-0.0791653	0.548203	0.999996	0.335257	0.00833284	0.285363	-0.203467	0.302993	0.999994	0.210956	0.115026	0.999996
ENSMUSG00000024220	Zfp523	zinc finger protein 523	0.196728	0.0439314	0.999996	0.172338	0.0683257	0.999999	0.0472946	0.781398	0.999994	0.0229051	0.846924	0.999996
ENSMUSG00000024276	Zfp397	zinc finger protein 397	0.242544	0.00637302	0.795961	0.335489	0.000317591	0.177263	0.00215161	0.989228	0.999994	0.0950965	0.300957	0.999996
ENSMUSG00000024298	Zfp871	zinc finger protein 871	-0.249188	0.105758	0.723757	-0.352892	0.0239435	0.286559	-0.187733	0.427655	0.999994	-0.291438	0.0839413	0.844328
ENSMUSG00000024317	Rnf138	ring finger protein 138	0.438053	0.00106837	0.079737	0.298198	0.0135527	0.423342	0.123129	0.526058	0.999994	-0.0167252	0.912379	0.999996
ENSMUSG00000024431	Nr3c1	nuclear receptor subfamily 3, group C, member 1	-0.164021	0.145045	0.999996	-0.0320285	0.793262	0.999999	-0.0228573	0.915235	0.999994	0.109135	0.37951	0.999996
ENSMUSG00000024513	Mbd2	methyl-CpG binding domain protein 2	-0.0629798	0.330322	0.999996	0.0103382	0.8844	0.999999	0.0436432	0.682563	0.999994	0.116961	0.0888413	0.999996
ENSMUSG00000024515	Smad4	SMAD family member 4	-0.145597	0.0199075	0.999996	-0.174172	0.0054105	0.999999	0.00657693	0.956778	0.999994	-0.0219976	0.766489	0.999996
ENSMUSG00000024561	Mbd1	methyl-CpG binding domain protein 1	-0.259692	0.00165644	0.68752	-0.164393	0.0285801	0.999999	-0.0574142	0.646787	0.999994	0.0378853	0.673789	0.999996
ENSMUSG00000024563	Smad2	SMAD family member 2	0.0121587	0.870097	0.999996	0.00742218	0.921347	0.999999	0.0280688	0.815729	0.999994	0.0233323	0.770831	0.999996
ENSMUSG00000024622	Hmgxb3	HMG box domain containing 3	-0.0543643	0.561845	0.999996	0.340774	0.000437078	0.171378	-0.0144987	0.935908	0.999994	0.380639	0.000535517	0.194365
ENSMUSG00000024695	Zfp91	zinc finger protein 91	-0.450424	1.43628e-05	0.0115321	-0.293416	0.000825554	0.382394	-0.00997448	0.952829	0.999994	0.147033	0.0957896	0.999996
ENSMUSG00000084807	Gm13073	predicted gene 13073	1.10099	0.000430029	0.00346141	1.37882	2.34438e-05	0.000133695	-0.0515152	0.93121	0.999994	0.226312	0.418327	0.999996
ENSMUSG00000024922	Ovol1	ovo like zinc finger 1	-0.324596	0.0125478	0.394345	-0.457984	0.000708988	0.0415581	0.072458	0.733519	0.999994	-0.0609299	0.686256	0.999996
ENSMUSG00000024927	Rela	v-rel reticuloendotheliosis viral oncogene homolog A (avian)	-0.161722	0.0230307	0.999996	0.00782186	0.92135	0.999999	-0.0205511	0.87608	0.999994	0.148993	0.0484634	0.999996
ENSMUSG00000024955	Esrra	estrogen related receptor, alpha	0.0657322	0.424724	0.999996	0.307019	0.000437739	0.296813	-0.0656772	0.618204	0.999994	0.175609	0.0419612	0.999996
ENSMUSG00000024968	Rcor2	REST corepressor 2	-0.305704	0.039274	0.499626	-0.120755	0.409779	0.999999	-0.109041	0.651223	0.999994	0.0759077	0.663676	0.999996
ENSMUSG00000024985	Tcf7l2	transcription factor 7 like 2, T cell specific, HMG box	-0.314211	0.0201623	0.447527	-0.419624	0.00271087	0.0985406	-0.150556	0.462385	0.999994	-0.255968	0.0797847	0.991207
ENSMUSG00000026896	Ifih1	interferon induced with helicase C domain 1	0.479796	4.56127e-06	0.00390957	0.754545	4.02014e-09	3.34577e-07	-0.0929981	0.45674	0.999994	0.181751	0.0322011	0.999996
ENSMUSG00000020412	Ascc2	activating signal cointegrator 1 complex subunit 2	0.490457	2.96698e-07	0.000556404	0.762718	1.69382e-10	1.51287e-08	-0.064347	0.538515	0.999994	0.207914	0.00434766	0.999996
ENSMUSG00000025025	Mxi1	MAX interactor 1, dimerization protein	0.0770901	0.28475	0.999996	-0.1967	0.00693168	0.999999	0.106192	0.337528	0.999994	-0.167599	0.0317793	0.999996
ENSMUSG00000025225	Nfkb2	nuclear factor of kappa light polypeptide gene enhancer in B cells 2, p49/p100	-0.261287	0.00122191	0.675096	-0.0539383	0.465084	0.999999	-0.0449007	0.71996	0.999994	0.162448	0.0418312	0.999996
ENSMUSG00000025255	Zfhx4	zinc finger homeodomain 4	0.0201464	0.924437	0.999996	-0.00991508	0.963575	0.999999	-0.323209	0.265126	0.999994	-0.35327	0.0795993	0.646539
ENSMUSG00000025323	Sp4	trans-acting transcription factor 4	0.0905419	0.550044	0.999996	0.118329	0.405997	0.999999	0.0976387	0.687436	0.999994	0.125426	0.428551	0.999996
ENSMUSG00000025332	Kdm5c	lysine (K)-specific demethylase 5C	-0.339275	0.00118915	0.253763	-0.186684	0.0468211	0.999999	-0.161162	0.272363	0.999994	-0.00857124	0.94507	0.999996
ENSMUSG00000003814	Calr	calreticulin	-0.816098	3.70544e-10	1.91852e-08	-0.54406	4.10352e-08	4.19612e-05	-0.0471193	0.674096	0.999994	0.224919	0.00357481	0.999996
ENSMUSG00000009378	Slc16a12	solute carrier family 16 (monocarboxylic acid transporters), member 12	-1.17161	2.84697e-09	4.05607e-08	-0.900474	3.53729e-08	9.43963e-07	-0.0761794	0.669859	0.999994	0.194962	0.111158	0.999996
ENSMUSG00000025423	Pias2	protein inhibitor of activated STAT 2	0.113839	0.109832	0.999996	0.0745971	0.289259	0.999999	0.0150187	0.912686	0.999994	-0.0242229	0.779129	0.999996
ENSMUSG00000068744	Psrc1	proline/serine-rich coiled-coil 1	0.493462	5.63206e-06	0.00350932	0.760734	5.36721e-09	4.08215e-07	0.134096	0.303345	0.999994	0.401368	0.000138781	0.0968853
ENSMUSG00000025602	Zfp202	zinc finger protein 202	0.518236	0.0105998	0.112171	0.939241	3.60868e-05	0.000386003	-0.10233	0.773687	0.999994	0.318675	0.110938	0.77265
ENSMUSG00000025612	Bach1	BTB and CNC homology 1, basic leucine zipper transcription factor 1	-0.415594	0.000348899	0.0720143	-0.274914	0.00794457	0.522278	-0.16194	0.30317	0.999994	-0.0212598	0.868061	0.999996
ENSMUSG00000025821	Zfp282	zinc finger protein 282	-0.0312727	0.833101	0.999996	0.271294	0.0373658	0.554707	0.0102727	0.967611	0.999994	0.312839	0.0302935	0.703612
ENSMUSG00000025880	Smad7	SMAD family member 7	-0.0301613	0.70298	0.999996	-0.15886	0.0286339	0.999999	0.0109759	0.940784	0.999994	-0.117723	0.136135	0.999996
ENSMUSG00000025912	Mybl1	myeloblastosis oncogene-like 1	-0.291245	0.0197257	0.532828	-0.0467338	0.718338	0.999999	-0.122401	0.526058	0.999994	0.12211	0.366858	0.999996
ENSMUSG00000025925	Terf1	telomeric repeat binding factor 1	0.260942	0.00108649	0.67785	-0.00896976	0.912863	0.999999	0.177123	0.131202	0.999994	-0.092789	0.2341	0.999996
ENSMUSG00000025958	Creb1	cAMP responsive element binding protein 1	-0.0232818	0.83856	0.999996	0.035979	0.743703	0.999999	-0.0924709	0.574603	0.999994	-0.0332101	0.790673	0.999996
ENSMUSG00000025959	Klf7	Kruppel-like factor 7 (ubiquitous)	-0.340147	0.00150379	0.260171	-0.387782	0.000354095	0.080509	-0.128654	0.396507	0.999994	-0.176289	0.100058	0.999996
ENSMUSG00000025997	Ikzf2	IKAROS family zinc finger 2	-0.25198	0.143994	0.715628	-0.365269	0.0374292	0.293029	-0.248729	0.352207	0.999994	-0.362018	0.0595645	0.592963
ENSMUSG00000026098	Pms1	PMS1 homolog 1, mismatch repair system component	0.267767	0.0260164	0.635797	0.26628	0.0209856	0.574361	0.143856	0.435364	0.999994	0.142368	0.255863	0.999996
ENSMUSG00000012350	Ehf	ets homologous factor	-1.11739	4.10579e-11	6.87663e-10	-1.30648	1.04836e-12	9.54439e-12	-0.121354	0.306625	0.999994	-0.310439	0.0010571	0.554532
ENSMUSG00000026135	Zfp142	zinc finger protein 142	-0.0883964	0.345597	0.999996	0.0853063	0.354813	0.999999	-0.152227	0.290592	0.999994	0.0214762	0.851846	0.999996
ENSMUSG00000026222	Sp100	nuclear antigen Sp100	0.119078	0.323034	0.999996	0.177527	0.129501	0.970027	-0.0892581	0.655685	0.999994	-0.0308093	0.834281	0.999996
ENSMUSG00000026279	Thap4	THAP domain containing 4	0.153732	0.0595358	0.999996	0.249942	0.00284027	0.686108	0.0859082	0.505885	0.999994	0.182118	0.0370378	0.999996
ENSMUSG00000026380	Tfcp2l1	transcription factor CP2-like 1	-0.531627	0.00312596	0.056053	-0.425596	0.0114046	0.141272	-0.160335	0.531463	0.999994	-0.0543035	0.788605	0.999996
ENSMUSG00000026436	Elk4	ELK4, member of ETS oncogene family	-0.181797	0.0725767	0.999996	-0.146023	0.141652	0.999999	-0.116719	0.457578	0.999994	-0.0809443	0.478344	0.999996
ENSMUSG00000026565	Pou2f1	POU domain, class 2, transcription factor 1	-0.274485	0.0673866	0.621449	-0.355076	0.0200762	0.273869	-0.244784	0.291678	0.999994	-0.325375	0.0493801	0.683195
ENSMUSG00000026628	Atf3	activating transcription factor 3	0.141621	0.0339144	0.999996	0.156206	0.0171532	0.999999	0.0586336	0.582992	0.999994	0.0732188	0.305726	0.999996
ENSMUSG00000026630	Batf3	basic leucine zipper transcription factor, ATF-like 3	0.509487	0.0332066	0.191827	0.382533	0.0991559	0.356345	0.000507322	0.998889	0.999994	-0.126447	0.638037	0.999996
ENSMUSG00000026638	Irf6	interferon regulatory factor 6	-0.262284	0.000244037	0.667772	-0.153634	0.0129869	0.999999	0.0304784	0.776204	0.999994	0.139129	0.0385255	0.999996
ENSMUSG00000026641	Usf1	upstream transcription factor 1	0.0867843	0.336948	0.999996	0.0730618	0.410137	0.999999	0.106451	0.44264	0.999994	0.092728	0.34139	0.999996
ENSMUSG00000062995	Ica1	islet cell autoantigen 1	0.617671	1.66236e-05	0.00150461	0.878697	6.16702e-08	1.7468e-06	0.0652246	0.74852	0.999994	0.326251	0.00736271	0.56426
ENSMUSG00000026740	Dnajc1	DnaJ heat shock protein family (Hsp40) member C1	0.215607	0.00487687	0.999996	0.567918	5.97103e-08	3.69693e-05	-0.02789	0.836755	0.999994	0.324421	0.000308515	0.399254
ENSMUSG00000026788	Zbtb43	zinc finger and BTB domain containing 43	-0.133122	0.0659588	0.999996	0.0849892	0.229188	0.999999	-0.101198	0.364204	0.999994	0.116913	0.131785	0.999996
ENSMUSG00000026803	Ttf1	transcription termination factor, RNA polymerase I	-0.138432	0.0916478	0.999996	-0.0742619	0.358656	0.999999	0.0421107	0.766014	0.999994	0.106281	0.231813	0.999996
ENSMUSG00000026826	Nr4a2	nuclear receptor subfamily 4, group A, member 2	-0.41505	0.105491	0.397331	-0.840063	0.00275622	0.0150932	-0.210955	0.60894	0.999994	-0.635968	0.0323445	0.220457
ENSMUSG00000036534	Slc38a7	solute carrier family 38, member 7	0.6389	7.00441e-06	0.000658692	0.899901	2.71466e-08	7.48016e-07	0.121891	0.484399	0.999994	0.382891	0.002015	0.262245
ENSMUSG00000026976	Pax8	paired box 8	-0.103421	0.397161	0.999996	-0.0674811	0.583658	0.999999	0.0101703	0.965105	0.999994	0.0461101	0.749812	0.999996
ENSMUSG00000026987	Baz2b	bromodomain adjacent to zinc finger domain, 2B	-0.226407	0.0337063	0.855624	-0.251951	0.0174266	0.653502	-0.133407	0.410934	0.999994	-0.158951	0.165735	0.999996
ENSMUSG00000027035	Cers6	ceramide synthase 6	0.00746844	0.939735	0.999996	0.257206	0.00347121	0.632426	-0.093785	0.486781	0.999994	0.155953	0.0877226	0.999996
ENSMUSG00000027067	Ssrp1	structure specific recognition protein 1	0.210766	0.00195777	0.999996	0.385275	1.93094e-06	0.0163608	0.0872762	0.370286	0.999994	0.261785	0.000667857	0.964648
ENSMUSG00000027102	Hoxd8	homeobox D8	0.00478901	0.972694	0.999996	0.246713	0.0447008	0.669588	-0.119483	0.554131	0.999994	0.122441	0.370159	0.999996
ENSMUSG00000027104	Atf2	activating transcription factor 2	-0.208748	0.0055677	0.999996	-0.194275	0.00761738	0.999999	-0.0937205	0.397887	0.999994	-0.0792475	0.313344	0.999996
ENSMUSG00000027109	Sp3	trans-acting transcription factor 3	-0.210251	0.026259	0.963477	-0.0335756	0.734984	0.999999	-0.00721478	0.967289	0.999994	0.169461	0.0909614	0.999996
ENSMUSG00000027210	Meis2	Meis homeobox 2	0.0333178	0.79002	0.999996	0.0444961	0.71165	0.999999	0.0012604	0.995527	0.999994	0.0124387	0.931421	0.999996
ENSMUSG00000027439	Gzf1	GDNF-inducible zinc finger protein 1	-0.224067	0.00329645	0.952214	-0.202254	0.00568475	0.999999	-0.0660444	0.561669	0.999994	-0.044231	0.596408	0.999996
ENSMUSG00000027490	E2f1	E2F transcription factor 1	-0.0232602	0.796894	0.999996	-0.0738193	0.368216	0.999999	-0.0796167	0.544122	0.999994	-0.130176	0.141111	0.999996
ENSMUSG00000027544	Nfatc2	nuclear factor of activated T cells, cytoplasmic, calcineurin dependent 2	-0.251054	0.0389224	0.721206	0.0849069	0.486496	0.999999	-0.24385	0.192159	0.999994	0.0921109	0.499493	0.999996
ENSMUSG00000027551	Zfp64	zinc finger protein 64	0.0965843	0.284248	0.999996	0.404789	6.76253e-05	0.036825	0.0170072	0.922779	0.999994	0.325212	0.00174468	0.482132
ENSMUSG00000027552	E2f5	E2F transcription factor 5	0.000703626	0.99374	0.999996	-0.165791	0.0294809	0.999999	0.175258	0.153475	0.999994	0.00876344	0.929321	0.999996
ENSMUSG00000027583	Zbtb46	zinc finger and BTB domain containing 46	0.0913972	0.58014	0.999996	0.267558	0.0799955	0.580258	-0.0526672	0.860672	0.999994	0.123493	0.475949	0.999996
ENSMUSG00000027667	Zfp639	zinc finger protein 639	0.363949	0.000156248	0.123746	0.349983	0.00013571	0.118985	0.136903	0.287318	0.999994	0.122936	0.157911	0.999996
ENSMUSG00000027684	Mecom	MDS1 and EVI1 complex locus	-0.725695	1.36274e-05	0.000562098	-0.416177	0.00234892	0.097468	-0.223685	0.253765	0.999994	0.0858339	0.583106	0.999996
ENSMUSG00000027796	Smad9	SMAD family member 9	-0.508003	0.182209	0.486843	-1.87711	9.83442e-05	0.00034018	0.134545	0.840906	0.999994	-1.23456	0.0127592	0.0779405
ENSMUSG00000027806	Tsc22d2	TSC22 domain family, member 2	-0.181307	0.0457925	0.999996	-0.0958586	0.283992	0.999999	-0.164684	0.235651	0.999994	-0.0792354	0.431798	0.999996
ENSMUSG00000027868	Tbx15	T-box 15	-0.120403	0.433105	0.999996	0.159962	0.276949	0.971171	-0.141824	0.554467	0.999994	0.138541	0.400871	0.999996
ENSMUSG00000027938	Creb3l4	cAMP responsive element binding protein 3-like 4	0.0980774	0.742146	0.999996	0.138911	0.622176	0.999999	-0.01574	0.978681	0.999994	0.0250938	0.944457	0.999996
ENSMUSG00000027985	Lef1	lymphoid enhancer binding factor 1	0.842848	0.0271635	0.11616	0.635286	0.0840352	0.235032	0.0659552	0.935256	0.999994	-0.141607	0.736518	0.999996
ENSMUSG00000028042	Zbtb7b	zinc finger and BTB domain containing 7B	-0.125218	0.206701	0.999996	0.284533	0.00490699	0.464276	-0.131685	0.392596	0.999994	0.278066	0.0113577	0.856872
ENSMUSG00000028101	Pias3	protein inhibitor of activated STAT 3	-0.13974	0.0851477	0.999996	-0.0592057	0.465335	0.999999	0.0582233	0.664943	0.999994	0.138758	0.111424	0.999996
ENSMUSG00000028150	Rorc	RAR-related orphan receptor gamma	0.082209	0.289409	0.999996	0.394954	1.52575e-05	0.0269056	-0.00518229	0.9715	0.999994	0.307563	0.00080166	0.561406
ENSMUSG00000028163	Nfkb1	nuclear factor of kappa light polypeptide gene enhancer in B cells 1, p105	-0.31969	0.000149572	0.258672	-0.0536714	0.456976	0.999999	-0.0721821	0.526467	0.999994	0.193837	0.0147866	0.999996
ENSMUSG00000028358	Zfp618	zinc finger protein 618	-0.292547	0.00684286	0.499809	0.0787375	0.4487	0.999999	-0.22466	0.166177	0.999994	0.146625	0.189244	0.999996
ENSMUSG00000028389	Zfp37	zinc finger protein 37	0.649114	0.000543618	0.0113531	0.426473	0.00991282	0.138387	0.207627	0.433949	0.999994	-0.0150141	0.941797	0.999996
ENSMUSG00000028423	Nfx1	nuclear transcription factor, X-box binding 1	0.18202	0.00750833	0.999996	0.225792	0.00108967	0.906629	0.138048	0.173086	0.999994	0.181819	0.0117507	0.999996
ENSMUSG00000028466	Creb3	cAMP responsive element binding protein 3	0.170839	0.0221166	0.999996	0.0938302	0.183877	0.999999	0.221976	0.079135	0.999994	0.144967	0.0630033	0.999996
ENSMUSG00000028487	Bnc2	basonuclin 2	-0.249994	0.144333	0.721291	-0.223472	0.183697	0.744632	-0.0747145	0.806145	0.999994	-0.0481931	0.822978	0.999996
ENSMUSG00000028565	Nfia	nuclear factor I/A	-0.24389	0.493616	0.922353	0.232109	0.52218	0.897149	-0.522226	0.337707	0.999994	-0.0462271	0.91804	0.999996
ENSMUSG00000028610	Dmrtb1	DMRT-like family B with proline-rich C-terminal, 1	-0.726597	0.0328323	0.144254	-0.241786	0.443772	0.824034	0.0949167	0.873447	0.999994	0.579728	0.111048	0.48402
ENSMUSG00000028639	Ybx1	Y box protein 1	0.309663	0.0100564	0.44003	0.0670845	0.574047	0.999999	-0.0911389	0.634014	0.999994	-0.333718	0.010063	0.550621
ENSMUSG00000028799	Zfp362	zinc finger protein 362	0.194201	0.0464432	0.999996	0.63776	6.79071e-07	9.23932e-05	-0.149347	0.328326	0.999994	0.294212	0.00597954	0.7348
ENSMUSG00000028807	Zbtb8a	zinc finger and BTB domain containing 8a	-0.0933435	0.502924	0.999996	0.081587	0.551993	0.999999	-0.0933136	0.678076	0.999994	0.081617	0.60024	0.999996
ENSMUSG00000028890	Mtf1	metal response element binding transcription factor 1	-0.129209	0.150837	0.999996	-0.0774268	0.390035	0.999999	-0.0799331	0.581239	0.999994	-0.0281506	0.800234	0.999996
ENSMUSG00000028901	Gmeb1	glucocorticoid modulatory element binding protein 1	-0.149521	0.0597746	0.999996	-0.150582	0.0520449	0.999999	0.00532715	0.971274	0.999994	0.00426624	0.967113	0.999996
ENSMUSG00000028952	Zbtb48	zinc finger and BTB domain containing 48	0.0329363	0.804906	0.999996	0.341614	0.00478874	0.246917	-0.019523	0.935908	0.999994	0.289155	0.024837	0.809412
ENSMUSG00000016206	H2-M3	histocompatibility 2, M region locus 3	0.561009	8.85679e-05	0.00728137	0.82138	2.44077e-07	8.03913e-06	0.255446	0.178158	0.999994	0.515816	0.000296597	0.0346577
ENSMUSG00000029127	Zbtb49	zinc finger and BTB domain containing 49	-0.0279025	0.83461	0.999996	0.182934	0.117333	0.950411	-0.0891326	0.656412	0.999994	0.121704	0.352295	0.999996
ENSMUSG00000028173	Wls	wntless WNT ligand secretion mediator	0.425205	4.58915e-07	0.00353116	0.680644	1.98085e-10	4.48411e-08	0.0328716	0.746348	0.999994	0.28831	0.000144332	0.660269
ENSMUSG00000029178	Klf3	Kruppel-like factor 3 (basic)	0.0704152	0.335904	0.999996	-0.0452715	0.540276	0.999999	-0.0604924	0.60707	0.999994	-0.176179	0.0258959	0.999996
ENSMUSG00000029196	Tada2b	transcriptional adaptor 2B	-0.297656	0.000639965	0.41612	-0.0493664	0.531433	0.999999	-0.0782688	0.524968	0.999994	0.170021	0.0440447	0.999996
ENSMUSG00000029238	Clock	circadian locomotor output cycles kaput	-0.135494	0.134929	0.999996	-0.125911	0.156549	0.999999	-0.0489312	0.75538	0.999994	-0.0393481	0.720029	0.999996
ENSMUSG00000029249	Rest	RE1-silencing transcription factor	-0.350372	0.0227291	0.351643	-0.277587	0.0598933	0.53945	-0.104775	0.672577	0.999994	-0.0319897	0.863953	0.999996
ENSMUSG00000029313	Aff1	AF4/FMR2 family, member 1	-0.170606	0.0656305	0.999996	0.0722094	0.437888	0.999999	-0.250278	0.10309	0.999994	-0.00746194	0.950383	0.999996
ENSMUSG00000029478	Ncor2	nuclear receptor co-repressor 2	-0.197229	0.0793441	0.975176	-0.00362015	0.977977	0.999999	-0.233122	0.181986	0.999994	-0.0395129	0.771373	0.999996
ENSMUSG00000029587	Zfp12	zinc finger protein 12	0.0151762	0.889254	0.999996	0.4229	8.1744e-05	0.0293428	0.00973917	0.959456	0.999994	0.417462	0.000387567	0.111326
ENSMUSG00000029627	Zkscan14	zinc finger with KRAB and SCAN domains 14	0.170292	0.0619048	0.999996	0.212171	0.0163493	0.907012	0.214902	0.139226	0.999994	0.25678	0.0095691	0.999996
ENSMUSG00000029705	Cux1	cut-like homeobox 1	-0.223626	0.00173129	0.979261	-0.312227	4.54838e-05	0.214686	0.0143309	0.909235	0.999994	-0.0742705	0.301854	0.999996
ENSMUSG00000029729	Zkscan1	zinc finger with KRAB and SCAN domains 1	-0.139284	0.15097	0.999996	0.0761451	0.434911	0.999999	-0.155554	0.30344	0.999994	0.0598755	0.595253	0.999996
ENSMUSG00000029771	Irf5	interferon regulatory factor 5	0.200157	0.144652	0.916333	0.58091	0.000131103	0.00569703	-0.0383534	0.882876	0.999994	0.342399	0.0189083	0.555261
ENSMUSG00000029832	Nfe2l3	nuclear factor, erythroid derived 2, like 3	0.18388	0.246008	0.94659	0.518317	0.00161465	0.0347809	-0.0831041	0.765737	0.999994	0.251333	0.127346	0.999996
ENSMUSG00000029844	Hoxa1	homeobox A1	0.0706438	0.647237	0.999996	-0.161748	0.259367	0.970968	0.0137418	0.961231	0.999994	-0.21865	0.16185	0.999996
ENSMUSG00000052684	Jun	jun proto-oncogene	-0.836679	4.58915e-07	1.57637e-05	-1.25809	6.67405e-10	7.86903e-09	-0.060172	0.75538	0.999994	-0.481584	0.000930113	0.0808246
ENSMUSG00000030067	Foxp1	forkhead box P1	-0.134357	0.161802	0.999996	-0.0329857	0.750832	0.999999	-0.148119	0.321268	0.999994	-0.0467476	0.682194	0.999996
ENSMUSG00000026615	Eprs	glutamyl-prolyl-tRNA synthetase	0.738685	3.65579e-09	3.58309e-07	0.987733	1.71005e-11	4.60047e-10	0.0371256	0.764322	0.999994	0.286174	0.000888324	0.737141
ENSMUSG00000030103	Bhlhe40	basic helix-loop-helix family, member e40	-0.331858	0.00768748	0.351481	-0.416888	0.00107456	0.0742708	0.136903	0.456838	0.999994	0.0518727	0.716188	0.999996
ENSMUSG00000030145	Zfp248	zinc finger protein 248	0.347357	0.0448783	0.400103	0.272943	0.0963963	0.56666	0.206317	0.444351	0.999994	0.131903	0.479056	0.999996
ENSMUSG00000030180	Kdm5a	lysine (K)-specific demethylase 5A	-0.218249	0.0256078	0.916333	-0.212068	0.0265115	0.884207	-0.109335	0.465498	0.999994	-0.103154	0.329563	0.999996
ENSMUSG00000022685	Parn	poly(A)-specific ribonuclease (deadenylation nuclease)	0.430369	6.05865e-07	0.00364675	0.677132	2.98806e-10	7.15063e-08	0.15589	0.118188	0.999994	0.402654	8.53941e-06	0.0276387
ENSMUSG00000030199	Etv6	ets variant 6	-0.225968	0.0126415	0.894307	0.0222995	0.815699	0.999999	-0.0960724	0.483637	0.999994	0.152195	0.107344	0.999996
ENSMUSG00000030232	Aebp2	AE binding protein 2	-0.130033	0.0834843	0.999996	-0.07389	0.322572	0.999999	-0.111235	0.338809	0.999994	-0.0550918	0.519474	0.999996
ENSMUSG00000030256	Bhlhe41	basic helix-loop-helix family, member e41	0.335966	0.0169364	0.375062	0.209465	0.115046	0.817759	0.134737	0.542195	0.999994	0.00823599	0.961976	0.999996
ENSMUSG00000030322	Mbd4	methyl-CpG binding domain protein 4	-0.106772	0.382281	0.999996	0.0462085	0.715625	0.999999	-0.0638248	0.758354	0.999994	0.0891562	0.510163	0.999996
ENSMUSG00000030353	Tead4	TEA domain family member 4	-0.432993	0.000244226	0.0510681	-0.359271	0.00100448	0.151288	-0.102734	0.520838	0.999994	-0.0290113	0.822559	0.999996
ENSMUSG00000030380	Mzf1	myeloid zinc finger 1	-0.436267	0.106616	0.382636	0.0924606	0.747458	0.999999	-0.216832	0.617545	0.999994	0.311896	0.292633	0.948774
ENSMUSG00000030386	Zfp606	zinc finger protein 606	0.0691489	0.563008	0.999996	0.280814	0.014364	0.498725	-0.150586	0.40088	0.999994	0.0610793	0.64586	0.999996
ENSMUSG00000030393	Zik1	zinc finger protein interacting with K protein 1	0.374213	0.00616508	0.245433	0.371951	0.00460605	0.178473	0.113958	0.626572	0.999994	0.111697	0.424933	0.999996
ENSMUSG00000030424	Zfp939	zinc finger protein 939	0.626036	0.00297807	0.0365457	0.21658	0.26055	0.7689	0.220166	0.487931	0.999994	-0.189289	0.367417	0.999996
ENSMUSG00000030469	Zfp719	zinc finger protein 719	-0.038397	0.821801	0.999996	-0.278044	0.0616653	0.53792	0.173312	0.463124	0.999994	-0.0663346	0.720029	0.999996
ENSMUSG00000030486	Zfp108	zinc finger protein 108	0.535252	0.116574	0.364904	0.209256	0.521533	0.907012	0.463343	0.385512	0.999994	0.137347	0.720818	0.999996
ENSMUSG00000030551	Nr2f2	nuclear receptor subfamily 2, group F, member 2	-0.445084	0.00067043	0.0639359	-0.313346	0.00875832	0.355194	-0.205926	0.248528	0.999994	-0.0741878	0.592362	0.999996
ENSMUSG00000030557	Mef2a	myocyte enhancer factor 2A	-0.277643	0.00473548	0.572861	-0.15582	0.0868821	0.999999	-0.0576775	0.712997	0.999994	0.0641454	0.548057	0.999996
ENSMUSG00000030604	Zfp626	zinc finger protein 626	-0.161829	0.32212	0.999996	-0.0633563	0.712322	0.999999	-0.0937811	0.735322	0.999994	0.00469216	0.982099	0.999996
ENSMUSG00000030678	Maz	MYC-associated zinc finger protein (purine-binding transcription factor)	0.152184	0.123696	0.999996	0.356569	0.000766634	0.14886	0.00756476	0.967745	0.999994	0.21195	0.046147	0.999996
ENSMUSG00000030699	Tbx6	T-box 6	0.598457	0.075135	0.266473	0.734567	0.019451	0.0746549	0.291649	0.602808	0.999994	0.427759	0.195856	0.732259
ENSMUSG00000030753	Thap12	THAP domain containing 12	-0.124453	0.107814	0.999996	0.0659522	0.392196	0.999999	-0.0538894	0.677279	0.999994	0.136516	0.101151	0.999996
ENSMUSG00000030796	Tead2	TEA domain family member 2	0.194935	0.00821879	0.999996	0.305769	0.000130342	0.272189	-0.0658738	0.563198	0.999994	0.0449603	0.580354	0.999996
ENSMUSG00000030823	9130019O22Rik	RIKEN cDNA 9130019O22 gene	-0.0863811	0.664503	0.999996	0.162155	0.373325	0.934392	-0.0328964	0.928753	0.999994	0.215639	0.280442	0.999996
ENSMUSG00000031103	Elf4	E74-like factor 4 (ets domain transcription factor)	-0.368772	0.000434535	0.144806	-0.365197	0.000350721	0.112409	-0.118822	0.401855	0.999994	-0.115247	0.260913	0.999996
ENSMUSG00000031365	Zfp275	zinc finger protein 275	-0.224079	0.0315243	0.872136	0.113765	0.261878	0.999999	-0.219948	0.168492	0.999994	0.117897	0.293518	0.999996
ENSMUSG00000031393	Mecp2	methyl CpG binding protein 2	-0.00344309	0.970262	0.999996	0.115452	0.148243	0.999999	-0.142218	0.257787	0.999994	-0.0233227	0.816701	0.999996
ENSMUSG00000031431	Tsc22d3	TSC22 domain family, member 3	-0.150974	0.0668333	0.999996	0.00897849	0.92285	0.999999	0.0559365	0.682563	0.999994	0.215889	0.0168492	0.999996
ENSMUSG00000031618	Nr3c2	nuclear receptor subfamily 3, group C, member 2	-0.436734	0.00038439	0.0572026	-0.229594	0.0325232	0.767887	-0.194498	0.236762	0.999994	0.0126427	0.928746	0.999996
ENSMUSG00000031627	Irf2	interferon regulatory factor 2	-0.0894535	0.191118	0.999996	0.0839007	0.208702	0.999999	-0.0130316	0.921907	0.999994	0.160323	0.0310144	0.999996
ENSMUSG00000031665	Sall1	spalt like transcription factor 1	-0.271793	0.00258433	0.600365	-0.0777597	0.354878	0.999999	-0.206789	0.127582	0.999994	-0.0127558	0.906222	0.999996
ENSMUSG00000031681	Smad1	SMAD family member 1	-0.0649607	0.449069	0.999996	0.305883	0.000638584	0.311656	-0.129112	0.32019	0.999994	0.241731	0.00902712	0.999996
ENSMUSG00000031706	Rfx1	regulatory factor X, 1 (influences HLA class II expression)	-0.0254495	0.840681	0.999996	0.124039	0.268317	0.999999	-0.119994	0.506801	0.999994	0.0294947	0.834168	0.999996
ENSMUSG00000031734	Irx3	Iroquois related homeobox 3	-1.31768	9.9456e-09	8.93544e-08	-1.22494	1.03358e-08	1.22878e-07	-0.213946	0.27863	0.999994	-0.12121	0.451007	0.999996
ENSMUSG00000025492	Ifitm3	interferon induced transmembrane protein 3	0.581649	4.11328e-06	0.000841379	0.826494	1.77141e-08	7.27546e-07	-0.296283	0.0782575	0.999994	-0.0514384	0.641944	0.999996
ENSMUSG00000031860	Pbx4	pre B cell leukemia homeobox 4	-0.117877	0.488404	0.999996	-0.199631	0.227125	0.825217	-0.171651	0.513857	0.999994	-0.253404	0.160927	0.999996
ENSMUSG00000031885	Cbfb	core binding factor beta	-0.206029	0.0134226	0.999996	-0.202948	0.0123774	0.981369	-0.00850624	0.958137	0.999994	-0.0054257	0.958868	0.999996
ENSMUSG00000031902	Nfatc3	nuclear factor of activated T cells, cytoplasmic, calcineurin dependent 3	-0.107406	0.248044	0.999996	0.0396486	0.684455	0.999999	-0.0654319	0.673717	0.999994	0.0816225	0.428192	0.999996
ENSMUSG00000031907	Zfp90	zinc finger protein 90	0.235956	0.00635116	0.843819	0.32132	0.000313762	0.225409	0.116889	0.362883	0.999994	0.202253	0.0219106	0.999996
ENSMUSG00000031921	Terf2	telomeric repeat binding factor 2	0.0639552	0.42139	0.999996	0.262964	0.0012692	0.590993	-0.0133767	0.931406	0.999994	0.185632	0.0267826	0.999996
ENSMUSG00000074818	Pdzd7	PDZ domain containing 7	1.72067	2.76485e-09	1.56295e-08	1.96024	9.20911e-11	3.76352e-10	0.135691	0.654099	0.999994	0.375266	0.016309	0.436183
ENSMUSG00000032119	Hinfp	histone H4 transcription factor	-0.0265905	0.776194	0.999996	0.00624336	0.948667	0.999999	0.0639173	0.650185	0.999994	0.0967512	0.294635	0.999996
ENSMUSG00000032228	Tcf12	transcription factor 12	0.193648	0.0139834	0.999996	0.368618	3.7343e-05	0.0617892	0.00114382	0.994412	0.999994	0.176115	0.0334129	0.999996
ENSMUSG00000032238	Rora	RAR-related orphan receptor alpha	-0.459308	0.0195152	0.181243	-0.44437	0.02109	0.155167	-0.162599	0.585591	0.999994	-0.14766	0.490061	0.999996
ENSMUSG00000032329	Hmg20a	high mobility group 20A	-0.251819	0.00178513	0.746882	-0.339412	7.11497e-05	0.128581	-0.020909	0.88014	0.999994	-0.108502	0.179481	0.999996
ENSMUSG00000041390	Mdfic	MyoD family inhibitor domain containing	0.504079	4.20382e-05	0.00891383	0.742686	1.36163e-07	8.59378e-06	-0.00340643	0.986076	0.999994	0.2352	0.0272655	0.999996
ENSMUSG00000032405	Pias1	protein inhibitor of activated STAT 1	-0.194877	0.0112458	0.999996	-0.118112	0.101103	0.999999	0.0507189	0.680144	0.999994	0.127483	0.110776	0.999996
ENSMUSG00000032411	Tfdp2	transcription factor Dp 2	0.119814	0.119966	0.999996	0.280821	0.0007019	0.455799	-0.0535751	0.680144	0.999994	0.107432	0.192141	0.999996
ENSMUSG00000032425	Zfp949	zinc finger protein 949	0.0385398	0.801421	0.999996	-0.195697	0.152794	0.867821	-0.0166347	0.952829	0.999994	-0.250872	0.0950828	0.999996
ENSMUSG00000032481	Smarcc1	SWI/SNF related, matrix associated, actin dependent regulator of chromatin, subfamily c, member 1	-0.122881	0.114894	0.999996	0.0243885	0.772325	0.999999	-0.0489657	0.711044	0.999994	0.0983034	0.246779	0.999996
ENSMUSG00000032727	Mier3	MIER family member 3	-0.153912	0.149518	0.999996	-0.161834	0.1198	0.999999	0.0293972	0.882583	0.999994	0.0214758	0.872744	0.999996
ENSMUSG00000032897	Nfyc	nuclear transcription factor-Y gamma	-0.0853516	0.297867	0.999996	-0.244603	0.00359286	0.72383	0.0351746	0.809995	0.999994	-0.124077	0.15927	0.999996
ENSMUSG00000032998	Foxj3	forkhead box J3	-0.0639906	0.471891	0.999996	0.139963	0.0952479	0.999999	0.0160157	0.924284	0.999994	0.219969	0.019714	0.999996
ENSMUSG00000033016	Nfatc1	nuclear factor of activated T cells, cytoplasmic, calcineurin dependent 1	-0.195103	0.120492	0.95233	-0.123816	0.320616	0.999999	-0.0743421	0.72883	0.999994	-0.00305479	0.985178	0.999996
ENSMUSG00000033237	Arid2	AT rich interactive domain 2 (ARID, RFX-like)	-0.225134	0.0731371	0.83377	-0.210384	0.0879968	0.830504	-0.123163	0.536001	0.999994	-0.108414	0.438923	0.999996
ENSMUSG00000033454	Zbtb1	zinc finger and BTB domain containing 1	-0.280272	0.00619586	0.561602	-0.343701	0.00100902	0.187558	-0.0619254	0.705188	0.999994	-0.125355	0.242421	0.999996
ENSMUSG00000033669	Zfp7	zinc finger protein 7	-0.136045	0.0701651	0.999996	-0.121251	0.0978439	0.999999	-0.00278366	0.984858	0.999994	0.0120104	0.899966	0.999996
ENSMUSG00000033713	Foxn3	forkhead box N3	-0.0991377	0.488326	0.999996	-0.0546437	0.708972	0.999999	-0.0132976	0.96066	0.999994	0.0311964	0.856403	0.999996
ENSMUSG00000033863	Klf9	Kruppel-like factor 9	-0.358905	0.000289529	0.152545	-0.0705329	0.410203	0.999999	-0.0229081	0.88706	0.999994	0.265464	0.00653866	0.931376
ENSMUSG00000033883	D3Ertd254e	DNA segment, Chr 3, ERATO Doi 254, expressed	-0.0866622	0.363965	0.999996	0.260922	0.00633342	0.60411	-0.177469	0.224698	0.999994	0.170115	0.0909722	0.999996
ENSMUSG00000033943	Mga	MAX gene associated	-0.149927	0.131583	0.999996	-0.10219	0.301193	0.999999	-0.129204	0.401982	0.999994	-0.0814669	0.466394	0.999996
ENSMUSG00000033961	Zfp446	zinc finger protein 446	0.115724	0.531412	0.999996	0.302775	0.0825504	0.472146	-0.138165	0.643738	0.999994	0.0488863	0.822098	0.999996
ENSMUSG00000033964	Zbtb41	zinc finger and BTB domain containing 41	-0.211638	0.157698	0.86479	-0.167994	0.255566	0.947738	-0.0977748	0.697436	0.999994	-0.0541309	0.765129	0.999996
ENSMUSG00000033972	Zfp944	zinc finger protein 944	0.108357	0.515545	0.999996	-0.218689	0.161766	0.764815	0.175641	0.485244	0.999994	-0.151405	0.393676	0.999996
ENSMUSG00000034071	Zfp551	zinc fingr protein 551	0.145822	0.598513	0.999996	0.157623	0.545426	0.968881	0.177755	0.686116	0.999994	0.189556	0.513026	0.999996
ENSMUSG00000034161	Scx	scleraxis	0.212439	0.0306419	0.940702	0.099646	0.298455	0.999999	0.0472707	0.781002	0.999994	-0.065522	0.552918	0.999996
ENSMUSG00000034227	Foxj1	forkhead box J1	0.219932	0.200243	0.820407	0.347461	0.0395439	0.328264	-0.0559949	0.866325	0.999994	0.0715341	0.724268	0.999996
ENSMUSG00000034271	Jdp2	Jun dimerization protein 2	0.361518	0.00060504	0.1709	0.392628	0.00018622	0.0624469	-0.0367081	0.835431	0.999994	-0.00559763	0.962637	0.999996
ENSMUSG00000034333	Zbed4	zinc finger, BED type containing 4	-0.353271	0.00104815	0.209727	-0.100058	0.298675	0.999999	-0.11642	0.438271	0.999994	0.136793	0.197003	0.999996
ENSMUSG00000034377	Tulp4	tubby like protein 4	-0.218515	0.0151571	0.934852	0.0163435	0.868134	0.999999	-0.231576	0.110191	0.999994	0.003282	0.977206	0.999996
ENSMUSG00000034429	Zfp707	zinc finger protein 707	-0.110058	0.280745	0.999996	0.183848	0.061425	0.999999	-0.0683667	0.686651	0.999994	0.225539	0.0382998	0.999996
ENSMUSG00000034430	Zxdc	ZXD family zinc finger C	-0.310543	0.0129152	0.44336	-0.251283	0.0342932	0.650665	0.0549373	0.795519	0.999994	0.114197	0.392208	0.999996
ENSMUSG00000034460	Six4	sine oculis-related homeobox 4	-0.0311012	0.803743	0.999996	0.135968	0.225637	0.999999	-0.245289	0.167617	0.999994	-0.07822	0.544712	0.999996
ENSMUSG00000034518	Hmgxb4	HMG box domain containing 4	0.0287929	0.746865	0.999996	0.343276	0.000163648	0.138941	-0.0195792	0.899425	0.999994	0.294904	0.00196776	0.690152
ENSMUSG00000034538	Zfp418	zinc finger protein 418	-0.243074	0.326712	0.797574	-0.00882192	0.974523	0.999999	0.113792	0.787846	0.999994	0.348044	0.182214	0.78569
ENSMUSG00000034551	Hdx	highly divergent homeobox	-0.301048	0.300492	0.715839	-0.571849	0.0595153	0.189104	-0.343053	0.445106	0.999994	-0.613854	0.0649823	0.347745
ENSMUSG00000034673	Pbx2	pre B cell leukemia homeobox 2	0.0569607	0.506256	0.999996	0.241277	0.0044335	0.744632	-0.063878	0.642216	0.999994	0.120439	0.17332	0.999996
ENSMUSG00000034762	Glis1	GLIS family zinc finger 1	-0.208344	0.41648	0.898234	0.0246917	0.929909	0.999999	-0.0639817	0.889516	0.999994	0.169054	0.554788	0.999996
ENSMUSG00000034800	Zfp661	zinc finger protein 661	0.333214	0.0300221	0.409044	0.394953	0.00924816	0.171509	0.0263019	0.932012	0.999994	0.0880407	0.606965	0.999996
ENSMUSG00000034998	Foxn2	forkhead box N2	0.057299	0.663726	0.999996	0.266145	0.0255773	0.576219	0.0794482	0.70136	0.999994	0.288294	0.0282757	0.817787
ENSMUSG00000035011	Zbtb7a	zinc finger and BTB domain containing 7a	-0.459559	0.000139904	0.0283929	-0.161111	0.108336	0.999999	-0.197931	0.207222	0.999994	0.100517	0.377447	0.999996
ENSMUSG00000035158	Mitf	melanogenesis associated transcription factor	0.136018	0.607224	0.999996	0.545154	0.0247057	0.117271	-0.0401411	0.937374	0.999994	0.368995	0.157063	0.72542
ENSMUSG00000035397	Klf16	Kruppel-like factor 16	0.00522642	0.957542	0.999996	0.169754	0.0420645	0.999999	0.0269338	0.868347	0.999994	0.191461	0.0373899	0.999996
ENSMUSG00000040998	Npnt	nephronectin	-0.852225	2.1379e-07	6.56846e-06	-0.616917	5.71557e-06	0.000513812	-0.226041	0.173095	0.999994	0.00926725	0.947917	0.999996
ENSMUSG00000035478	Mbd3	methyl-CpG binding domain protein 3	0.185216	0.0255697	0.999996	0.17818	0.0276239	0.999999	-0.0246616	0.874408	0.999994	-0.0316979	0.746892	0.999996
ENSMUSG00000035529	Prdm4	PR domain containing 4	-0.00789409	0.933127	0.999996	0.17124	0.0336258	0.999999	-0.0425428	0.764472	0.999994	0.136592	0.118943	0.999996
ENSMUSG00000035799	Twist1	twist basic helix-loop-helix transcription factor 1	0.229977	0.243094	0.794158	0.432712	0.0266442	0.183904	-0.162113	0.623855	0.999994	0.0406223	0.865402	0.999996
ENSMUSG00000035868	Zfp983	zinc finger protein 983	0.313225	0.0787781	0.514568	0.0915985	0.60996	0.999999	0.291837	0.291678	0.999994	0.0702097	0.7367	0.999996
ENSMUSG00000020185	E2f7	E2F transcription factor 7	-0.894921	7.53489e-08	2.33368e-06	-1.21369	4.35071e-10	5.80773e-09	-0.130364	0.411894	0.999994	-0.449131	0.00104895	0.113436
ENSMUSG00000036036	Zfp57	zinc finger protein 57	0.375686	0.00111322	0.161851	0.80387	6.60206e-08	2.76804e-06	-0.0141485	0.949246	0.999994	0.414035	0.000707359	0.141324
ENSMUSG00000036192	Rorb	RAR-related orphan receptor beta	-0.148416	0.882627	0.999996	-0.535543	0.530075	0.862763	0.467173	0.749688	0.999994	0.0800463	0.944016	0.999996
ENSMUSG00000036281	Snapc4	small nuclear RNA activating complex, polypeptide 4	0.0339403	0.737685	0.999996	0.486003	1.28979e-05	0.00478649	-0.0684247	0.660483	0.999994	0.383638	0.000638382	0.195533
ENSMUSG00000036442	Thap11	THAP domain containing 11	0.20763	0.0219081	0.989956	0.269768	0.003289	0.545702	-0.0242604	0.885661	0.999994	0.0378778	0.720355	0.999996
ENSMUSG00000036461	Elf1	E74-like factor 1	-0.16272	0.0628867	0.999996	-0.175699	0.041524	0.999999	-0.0778184	0.578494	0.999994	-0.0907978	0.345407	0.999996
ENSMUSG00000036721	Zscan12	zinc finger and SCAN domain containing 12	0.0948446	0.456212	0.999996	-0.0584529	0.644242	0.999999	0.184311	0.333266	0.999994	0.0310138	0.837883	0.999996
ENSMUSG00000036867	Smad6	SMAD family member 6	-0.47675	0.00181899	0.0694678	-0.338632	0.0166405	0.304653	-0.16221	0.449745	0.999994	-0.0240924	0.895692	0.999996
ENSMUSG00000036898	Zfp157	zinc finger protein 157	0.267375	0.0031094	0.628487	0.173599	0.0358112	0.999999	0.134752	0.308834	0.999994	0.0409752	0.677282	0.999996
ENSMUSG00000037001	Zfp39	zinc finger protein 39	0.129424	0.355584	0.999996	0.370546	0.00724438	0.198495	-0.0087575	0.973124	0.999994	0.232364	0.108686	0.999996
ENSMUSG00000037007	Zfp113	zinc finger protein 113	0.0870089	0.336578	0.999996	0.210802	0.018413	0.909552	-0.12127	0.387148	0.999994	0.0025233	0.98239	0.999996
ENSMUSG00000037017	Zscan21	zinc finger and SCAN domain containing 21	0.178104	0.014587	0.999996	0.0921109	0.181305	0.999999	0.173152	0.131189	0.999994	0.0871588	0.255213	0.999996
ENSMUSG00000037029	Zfp146	zinc finger protein 146	-0.105232	0.331192	0.999996	0.138843	0.183877	0.999999	-0.118656	0.48069	0.999994	0.125419	0.280291	0.999996
ENSMUSG00000023909	Paqr4	progestin and adipoQ receptor family member IV	-0.720644	4.74699e-05	0.00145378	-0.487641	0.00132544	0.040724	-0.0847581	0.721985	0.999994	0.148245	0.367303	0.999996
ENSMUSG00000037174	Elf2	E74-like factor 2	-0.0665148	0.382624	0.999996	0.102861	0.159044	0.999999	-0.0394806	0.760872	0.999994	0.129896	0.106089	0.999996
ENSMUSG00000037188	Grhl3	grainyhead like transcription factor 3	-0.305912	0.200324	0.61996	0.421968	0.0598801	0.258999	-0.0497063	0.911783	0.999994	0.678173	0.00924744	0.0986068
ENSMUSG00000037214	Thap1	THAP domain containing, apoptosis associated protein 1	0.0599966	0.570486	0.999996	-0.136685	0.164659	0.999999	0.083651	0.608959	0.999994	-0.113031	0.30425	0.999996
ENSMUSG00000037235	Mxd4	Max dimerization protein 4	-0.253083	0.0270243	0.714738	0.0777572	0.489527	0.999999	-0.0585065	0.762744	0.999994	0.272334	0.0263722	0.896821
ENSMUSG00000037243	Zfp692	zinc finger protein 692	0.145826	0.164775	0.999996	0.330949	0.00198514	0.246917	0.216422	0.182236	0.999994	0.401545	0.00108044	0.18541
ENSMUSG00000037395	Rcor3	REST corepressor 3	-0.0282256	0.77664	0.999996	0.0409376	0.666199	0.999999	-0.0423836	0.791459	0.999994	0.0267796	0.810324	0.999996
ENSMUSG00000037447	Arid5a	AT rich interactive domain 5A (MRF1-like)	0.361249	0.00867047	0.278326	0.779724	3.08954e-06	9.16148e-05	-0.181015	0.394646	0.999994	0.237461	0.0833235	0.999996
ENSMUSG00000037465	Klf10	Kruppel-like factor 10	-0.307365	0.000629955	0.364222	-0.477767	2.97414e-06	0.0024989	-0.00284438	0.985141	0.999994	-0.173246	0.0483709	0.999996
ENSMUSG00000037572	Wdhd1	WD repeat and HMG-box DNA binding protein 1	-0.236398	0.00665944	0.840358	-0.377371	7.80851e-05	0.0634214	0.00512747	0.973163	0.999994	-0.135845	0.133892	0.999996
ENSMUSG00000037638	Zbtb42	zinc finger and BTB domain containing 42	-0.481773	0.00161042	0.0636883	-0.194152	0.154214	0.87459	-0.129152	0.557768	0.999994	0.158468	0.307086	0.999996
ENSMUSG00000037640	Zfp60	zinc finger protein 60	-0.115288	0.197021	0.999996	-0.108048	0.215869	0.999999	0.00358623	0.982967	0.999994	0.0108268	0.924832	0.999996
ENSMUSG00000037674	Rfx7	regulatory factor X, 7	-0.141339	0.142493	0.999996	0.0763868	0.429758	0.999999	-0.145686	0.330101	0.999994	0.072039	0.509549	0.999996
ENSMUSG00000037730	Mynn	myoneurin	-0.0819863	0.239855	0.999996	-0.0768816	0.257596	0.999999	0.137338	0.2001	0.999994	0.142442	0.0571491	0.999996
ENSMUSG00000022742	Cpox	coproporphyrinogen oxidase	0.47878	3.7943e-07	0.000849522	0.708826	4.38552e-10	7.15063e-08	0.0345877	0.759365	0.999994	0.264633	0.000675092	0.933623
ENSMUSG00000037896	Rcor1	REST corepressor 1	-0.272402	0.00771607	0.605372	-0.108457	0.261598	0.999999	-0.123306	0.412965	0.999994	0.0406391	0.731181	0.999996
ENSMUSG00000037935	Smarce1	SWI/SNF related, matrix associated, actin dependent regulator of chromatin, subfamily e, member 1	0.225411	0.00102936	0.980661	0.202474	0.00188392	0.999999	0.133014	0.169632	0.999994	0.110077	0.0995237	0.999996
ENSMUSG00000037992	Rara	retinoic acid receptor, alpha	-0.225786	0.0146184	0.890013	-0.0836325	0.351553	0.999999	-0.172592	0.212025	0.999994	-0.0304382	0.782153	0.999996
ENSMUSG00000005364	Il5ra	interleukin 5 receptor, alpha	-2.83508	5.31888e-06	2.07103e-05	-2.60566	4.17796e-06	1.26434e-05	-0.000134918	0.999742	0.999994	0.229282	0.759351	0.999996
ENSMUSG00000038203	Hoxa13	homeobox A13	-0.130583	0.7044	0.999996	0.635452	0.037719	0.130208	-0.23911	0.654815	0.999994	0.526926	0.110418	0.500533
ENSMUSG00000038210	Hoxa11	homeobox A11	0.110495	0.391052	0.999996	0.304319	0.0124314	0.398027	0.218551	0.257716	0.999994	0.412375	0.0033716	0.228289
ENSMUSG00000038227	Hoxa9	homeobox A9	0.0213988	0.84942	0.999996	0.0225065	0.840386	0.999999	0.0523415	0.765027	0.999994	0.0534492	0.651977	0.999996
ENSMUSG00000038236	Hoxa7	homeobox A7	-0.0699681	0.489948	0.999996	0.0315906	0.765655	0.999999	-0.0935293	0.552193	0.999994	0.00802939	0.949662	0.999996
ENSMUSG00000038253	Hoxa5	homeobox A5	-0.329661	0.0243026	0.408328	-0.0985807	0.505427	0.999999	-0.296927	0.182236	0.999994	-0.0658464	0.706788	0.999996
ENSMUSG00000038331	Satb2	special AT-rich sequence binding protein 2	-0.0162065	0.929678	0.999996	0.241366	0.125681	0.680206	-0.238422	0.341306	0.999994	0.0191504	0.924843	0.999996
ENSMUSG00000038342	Mlxip	MLX interacting protein	-0.213416	0.0207228	0.954166	-0.0563139	0.543568	0.999999	-0.201693	0.158947	0.999994	-0.0445914	0.677994	0.999996
ENSMUSG00000038346	Zfp384	zinc finger protein 384	0.0168939	0.854741	0.999996	0.159929	0.0483106	0.999999	-0.0022742	0.988389	0.999994	0.140761	0.111654	0.999996
ENSMUSG00000038415	Foxq1	forkhead box Q1	-0.110432	0.416534	0.999996	0.121751	0.335983	0.999999	0.227344	0.256702	0.999994	0.459526	0.0023906	0.14053
ENSMUSG00000043430	Psapl1	prosaposin-like 1	-1.58728	0.000356938	0.00186012	-1.36176	0.00081943	0.00319733	-0.0664371	0.91919	0.999994	0.159086	0.763677	0.999996
ENSMUSG00000038482	Tfdp1	transcription factor Dp 1	-0.0935756	0.1007	0.999996	-0.111376	0.0472346	0.999999	0.0141809	0.893762	0.999994	-0.00361995	0.960752	0.999996
ENSMUSG00000038518	Jarid2	jumonji, AT rich interactive domain 2	-0.339266	0.00286728	0.289026	-0.332457	0.0028232	0.253033	-0.128555	0.42803	0.999994	-0.121746	0.304498	0.999996
ENSMUSG00000005373	Mlxipl	MLX interacting protein-like	-1.12441	0.00133899	0.0084747	-1.16826	0.000580636	0.00285747	0.058961	0.914601	0.999994	0.0151171	0.973707	0.999996
ENSMUSG00000038560	Sp6	trans-acting transcription factor 6	-0.00540317	0.964888	0.999996	0.642125	1.97205e-06	0.000195937	-0.0849539	0.633128	0.999994	0.562574	7.12625e-05	0.00966225
ENSMUSG00000038615	Nfe2l1	nuclear factor, erythroid derived 2,-like 1	0.0807098	0.345245	0.999996	0.488985	4.1186e-06	0.00243438	-0.160519	0.219401	0.999994	0.247756	0.00872902	0.999996
ENSMUSG00000038668	Lpar1	lysophosphatidic acid receptor 1	-1.01878	0.000335871	0.00322315	-0.794852	0.00223405	0.0136263	-0.21518	0.567443	0.999994	0.00875171	0.979544	0.999996
ENSMUSG00000038679	Trps1	transcriptional repressor GATA binding 1	-0.296722	0.0147793	0.500471	-0.0612075	0.62057	0.999999	-0.235249	0.198696	0.999994	0.000264781	0.998691	0.999996
ENSMUSG00000038692	Hoxb4	homeobox B4	-0.312065	0.00197348	0.376489	-0.134517	0.141473	0.999999	-0.168178	0.238259	0.999994	0.00937025	0.93839	0.999996
ENSMUSG00000032489	Kif9	kinesin family member 9	0.70993	0.000304342	0.005789	0.933172	7.22234e-06	9.81293e-05	0.0389542	0.90976	0.999994	0.262196	0.13035	0.964648
ENSMUSG00000038705	Gmeb2	glucocorticoid modulatory element binding protein 2	-0.0802483	0.402873	0.999996	0.00402584	0.970475	0.999999	0.086322	0.564503	0.999994	0.170596	0.0903698	0.999996
ENSMUSG00000038718	Pbx3	pre B cell leukemia homeobox 3	0.00290641	0.970962	0.999996	0.260671	0.000574108	0.611164	-0.0226528	0.866167	0.999994	0.235112	0.00345806	0.999996
ENSMUSG00000038721	Hoxb7	homeobox B7	-0.0973458	0.375819	0.999996	-0.132996	0.209209	0.999999	-0.0201872	0.923746	0.999994	-0.0558378	0.661338	0.999996
ENSMUSG00000038797	Zscan2	zinc finger and SCAN domain containing 2	0.0140652	0.941638	0.999996	0.279832	0.0758312	0.537645	0.0855809	0.764472	0.999994	0.351348	0.0441992	0.593857
ENSMUSG00000038872	Zfhx3	zinc finger homeobox 3	-0.386322	0.006846	0.215029	-0.545767	0.000388615	0.0131922	-0.265318	0.205075	0.999994	-0.424762	0.0072156	0.252334
ENSMUSG00000038895	Zfp653	zinc finger protein 653	0.513414	0.00571643	0.0872348	0.608211	0.00088694	0.0141017	0.218139	0.433949	0.999994	0.312937	0.0828928	0.763629
ENSMUSG00000038909	Kat7	K(lysine) acetyltransferase 7	-0.0108917	0.886208	0.999996	0.10355	0.110889	0.999999	0.117779	0.251888	0.999994	0.232221	0.00266873	0.999996
ENSMUSG00000039068	Zzz3	zinc finger, ZZ domain containing 3	-0.0167488	0.819074	0.999996	0.170443	0.0102805	0.999999	-0.0791502	0.438985	0.999994	0.108042	0.127002	0.999996
ENSMUSG00000039087	Rreb1	ras responsive element binding protein 1	-0.411927	0.00228168	0.131264	-0.289722	0.0214324	0.468546	-0.314508	0.121592	0.999994	-0.192303	0.15927	0.999996
ENSMUSG00000039153	Runx2	runt related transcription factor 2	0.224658	0.145254	0.808312	0.00836162	0.962075	0.999999	0.0968941	0.713176	0.999994	-0.119402	0.48668	0.999996
ENSMUSG00000039191	Rbpj	recombination signal binding protein for immunoglobulin kappa J region	-0.0327343	0.711786	0.999996	0.0141493	0.8777	0.999999	-0.0245239	0.874867	0.999994	0.0223596	0.827177	0.999996
ENSMUSG00000039219	Arid4b	AT rich interactive domain 4B (RBP1-like)	-0.139867	0.110661	0.999996	-0.237425	0.0078009	0.758802	-0.0106818	0.952829	0.999994	-0.108239	0.260083	0.999996
ENSMUSG00000039275	Foxk2	forkhead box K2	-0.0321935	0.754011	0.999996	0.369564	0.000335674	0.103877	-0.0556675	0.730626	0.999994	0.34609	0.00175507	0.38675
ENSMUSG00000039377	Hlx	H2.0-like homeobox	0.366946	0.106582	0.447012	0.342105	0.118069	0.427925	0.109162	0.789495	0.999994	0.0843213	0.750774	0.999996
ENSMUSG00000039634	Zfp189	zinc finger protein 189	-0.197447	0.31791	0.894192	0.188328	0.312721	0.85928	0.0773304	0.827997	0.999994	0.463105	0.0271787	0.315072
ENSMUSG00000039656	Rxrb	retinoid X receptor beta	0.330285	0.00071447	0.26685	0.643803	1.4549e-07	2.51833e-05	0.0273135	0.870385	0.999994	0.340832	0.000992432	0.374781
ENSMUSG00000039759	Thap3	THAP domain containing, apoptosis associated protein 3	0.358069	0.00633884	0.271036	0.457437	0.000626686	0.0401863	0.0438354	0.853807	0.999994	0.143203	0.280442	0.999996
ENSMUSG00000039789	Zfp597	zinc finger protein 597	-0.248062	0.0152912	0.746324	-0.134355	0.169853	0.999999	-0.143105	0.351629	0.999994	-0.0293987	0.813061	0.999996
ENSMUSG00000039834	Zfp335	zinc finger protein 335	0.00835804	0.953886	0.999996	0.137076	0.258796	0.999999	0.0705609	0.742952	0.999994	0.199279	0.134132	0.999996
ENSMUSG00000039841	Zfp800	zinc finger protein 800	-0.158264	0.118548	0.999996	0.00360004	0.97573	0.999999	-0.0254451	0.892329	0.999994	0.136419	0.213311	0.999996
ENSMUSG00000039852	Rere	arginine glutamic acid dipeptide (RE) repeats	-0.372087	0.000851145	0.159967	-0.191583	0.0526916	0.966741	-0.161033	0.300837	0.999994	0.0194707	0.878181	0.999996
ENSMUSG00000039967	Zfp292	zinc finger protein 292	-0.109288	0.522827	0.999996	-0.0483731	0.786796	0.999999	-0.1426	0.593205	0.999994	-0.0816858	0.675079	0.999996
ENSMUSG00000040033	Stat2	signal transducer and activator of transcription 2	0.101614	0.355605	0.999996	0.455324	0.000189441	0.0250485	-0.162291	0.336157	0.999994	0.191419	0.0999068	0.999996
ENSMUSG00000040054	Baz2a	bromodomain adjacent to zinc finger domain, 2A	-0.230784	0.0139423	0.859299	0.00161593	0.988091	0.999999	-0.17304	0.219401	0.999994	0.0593597	0.572245	0.999996
ENSMUSG00000040187	Arntl2	aryl hydrocarbon receptor nuclear translocator-like 2	0.361163	0.0126089	0.297011	0.716206	1.61701e-05	0.000495909	-0.0714042	0.77668	0.999994	0.283638	0.0503869	0.856872
ENSMUSG00000040270	Bach2	BTB and CNC homology, basic leucine zipper transcription factor 2	0.170645	0.539211	0.999996	0.343573	0.200906	0.514413	-0.320433	0.456274	0.999994	-0.147505	0.634109	0.999996
ENSMUSG00000040289	Hey1	hairy/enhancer-of-split related with YRPW motif 1	-0.792924	0.0480858	0.178815	-0.621365	0.108524	0.284	-0.119368	0.866742	0.999994	0.0521906	0.923481	0.999996
ENSMUSG00000040321	Zfp770	zinc finger protein 770	0.134865	0.305936	0.999996	-0.0945965	0.475211	0.999999	0.0131667	0.959703	0.999994	-0.216295	0.123566	0.999996
ENSMUSG00000040433	Zbtb38	zinc finger and BTB domain containing 38	-0.52236	2.00171e-05	0.00478355	-0.246518	0.0120309	0.689644	-0.221493	0.152055	0.999994	0.0543479	0.639204	0.999996
ENSMUSG00000040712	Camta2	calmodulin binding transcription activator 2	-0.0915083	0.360411	0.999996	0.1526	0.115498	0.999999	-0.212206	0.168492	0.999994	0.0319023	0.791121	0.999996
ENSMUSG00000040721	Zfhx2	zinc finger homeobox 2	-0.192792	0.0997171	0.979833	-0.0742769	0.546322	0.999999	-0.368704	0.0736476	0.999994	-0.250189	0.0524639	0.999996
ENSMUSG00000040841	Six5	sine oculis-related homeobox 5	0.0989961	0.643128	0.999996	0.808049	0.000181119	0.00196245	-0.0363476	0.928335	0.999994	0.672705	0.002492	0.0454088
ENSMUSG00000040857	Erf	Ets2 repressor factor	-0.232412	0.0241101	0.830755	0.08418	0.405997	0.999999	-0.178214	0.253005	0.999994	0.138377	0.20636	0.999996
ENSMUSG00000040929	Rfx3	regulatory factor X, 3 (influences HLA class II expression)	-0.00356135	0.983136	0.999996	-0.254221	0.086886	0.632426	-0.100659	0.687436	0.999994	-0.351318	0.0323749	0.567415
ENSMUSG00000041164	Zmiz2	zinc finger, MIZ-type containing 2	-0.0909431	0.277737	0.999996	0.15175	0.0627712	0.999999	-0.10829	0.401047	0.999994	0.134403	0.133089	0.999996
ENSMUSG00000041258	Zfp236	zinc finger protein 236	-0.0850611	0.506873	0.999996	-0.0353037	0.793766	0.999999	-0.08824	0.670759	0.999994	-0.0384826	0.800631	0.999996
ENSMUSG00000041272	Tox	thymocyte selection-associated high mobility group box	-0.260588	0.292588	0.753414	-0.452224	0.0663979	0.247934	-0.117727	0.782208	0.999994	-0.309362	0.262546	0.917834
ENSMUSG00000041420	Meis3	Meis homeobox 3	0.0727481	0.555126	0.999996	-0.0106846	0.936607	0.999999	-0.012435	0.958412	0.999994	-0.0958678	0.466394	0.999996
ENSMUSG00000041483	Zfp281	zinc finger protein 281	-0.166029	0.0765412	0.999996	0.127731	0.161341	0.999999	-0.106557	0.465125	0.999994	0.187204	0.0632718	0.999996
ENSMUSG00000041515	Irf8	interferon regulatory factor 8	-0.16603	0.105981	0.999996	-0.103968	0.301292	0.999999	0.0519886	0.768591	0.999994	0.114051	0.309431	0.999996
ENSMUSG00000042063	Zfp386	zinc finger protein 386 (Kruppel-like)	0.343409	0.00236444	0.267611	-0.0966219	0.354813	0.999999	0.155473	0.340956	0.999994	-0.284558	0.0138321	0.821013
ENSMUSG00000042097	Zfp239	zinc finger protein 239	0.171327	0.617206	0.999996	0.166512	0.624035	0.999999	-0.0797987	0.897522	0.999994	-0.0846139	0.832655	0.999996
ENSMUSG00000042207	Kdm5b	lysine (K)-specific demethylase 5B	0.0357784	0.641152	0.999996	0.20418	0.00546459	0.999999	-0.042522	0.731192	0.999994	0.12588	0.103431	0.999996
ENSMUSG00000042320	Prox2	prospero homeobox 2	-0.184315	0.431152	0.941649	-0.0618047	0.800992	0.999999	0.0156112	0.970486	0.999994	0.138121	0.601173	0.999996
ENSMUSG00000042323	Pbrm1	polybromo 1	-0.289382	0.00677033	0.516401	-0.296907	0.00475647	0.403339	-0.152692	0.333162	0.999994	-0.160216	0.147613	0.999996
ENSMUSG00000042390	Gatad2b	GATA zinc finger domain containing 2B	-0.249589	0.0238303	0.733501	-0.147366	0.164433	0.999999	-0.0688553	0.705892	0.999994	0.033367	0.802693	0.999996
ENSMUSG00000042406	Atf4	activating transcription factor 4	0.599957	2.9112e-07	8.52145e-05	0.352023	9.34409e-05	0.106074	0.204267	0.115274	0.999994	-0.0436669	0.637242	0.999996
ENSMUSG00000042439	Zfp532	zinc finger protein 532	-0.00712797	0.957156	0.999996	0.386948	0.00155517	0.119093	-0.241236	0.182729	0.999994	0.15284	0.217823	0.999996
ENSMUSG00000042472	Zfp410	zinc finger protein 410	-0.000689082	0.992653	0.999996	-0.0538095	0.40268	0.999999	0.0802304	0.418851	0.999994	0.02711	0.725953	0.999996
ENSMUSG00000042496	Prdm10	PR domain containing 10	-0.0602863	0.685087	0.999996	-0.114235	0.405837	0.999999	0.0597898	0.809676	0.999994	0.00584063	0.974109	0.999996
ENSMUSG00000042508	Dmtf1	cyclin D binding myb-like transcription factor 1	0.130716	0.0493773	0.999996	0.057057	0.384847	0.999999	0.128705	0.206575	0.999994	0.0550464	0.454168	0.999996
ENSMUSG00000042622	Maff	v-maf musculoaponeurotic fibrosarcoma oncogene family, protein F (avian)	-0.0337629	0.718857	0.999996	-0.257796	0.00388198	0.628107	0.138592	0.30296	0.999994	-0.0854406	0.372217	0.999996
ENSMUSG00000042745	Id1	inhibitor of DNA binding 1	-0.399398	0.000420263	0.0942849	-1.4535	1.20652e-11	9.72507e-11	0.18231	0.228718	0.999994	-0.871796	9.58024e-07	3.00235e-05
ENSMUSG00000042812	Foxf1	forkhead box F1	0.656926	0.0764872	0.264226	1.82953	1.09872e-05	4.4654e-05	-0.063915	0.936574	0.999994	1.10869	0.00264498	0.0248817
ENSMUSG00000042903	Foxo4	forkhead box O4	-0.348345	0.000875992	0.216789	-0.0595821	0.533392	0.999999	-0.138054	0.340136	0.999994	0.150709	0.140573	0.999996
ENSMUSG00000043059	Zfp513	zinc finger protein 513	0.0406848	0.70677	0.999996	0.223476	0.0230711	0.816398	0.12449	0.418979	0.999994	0.307281	0.00616515	0.6546
ENSMUSG00000043090	Zfp866	zinc finger protein 866	-0.143159	0.0545748	0.999996	-0.0491262	0.511268	0.999999	-0.0281043	0.836444	0.999994	0.0659289	0.42352	0.999996
ENSMUSG00000043219	Hoxa6	homeobox A6	-0.409693	0.0946355	0.383898	0.124809	0.628004	0.999999	-0.39287	0.30317	0.999994	0.141632	0.626216	0.999996
ENSMUSG00000043290	Zfp784	zinc finger protein 784	0.176692	0.603645	0.999996	0.0852286	0.802499	0.999999	0.210847	0.698272	0.999994	0.119384	0.751059	0.999996
ENSMUSG00000043342	Hoxd9	homeobox D9	0.237509	0.150953	0.761676	0.689697	0.000130342	0.00257514	0.0557505	0.860204	0.999994	0.507939	0.00472271	0.132023
ENSMUSG00000043467	Zbtb37	zinc finger and BTB domain containing 37	0.0350924	0.826855	0.999996	0.0677508	0.657929	0.999999	-0.204529	0.365888	0.999994	-0.17187	0.276788	0.999996
ENSMUSG00000043602	Zfp3	zinc finger protein 3	0.126365	0.524172	0.999996	0.298198	0.101662	0.497287	0.107034	0.7476	0.999994	0.278868	0.163651	0.914584
ENSMUSG00000043903	Zfp469	zinc finger protein 469	-0.508463	0.030064	0.185157	-0.345729	0.140733	0.446521	-0.436442	0.220095	0.999994	-0.273709	0.298076	0.999996
ENSMUSG00000043969	Emx2	empty spiracles homeobox 2	-0.161666	0.119896	0.999996	-0.142293	0.162476	0.999999	-0.0548304	0.760709	0.999994	-0.0354581	0.780697	0.999996
ENSMUSG00000044167	Foxo1	forkhead box O1	-0.512563	3.03804e-05	0.00676264	-0.39233	0.000338725	0.0742524	-0.187148	0.218438	0.999994	-0.0669142	0.561953	0.999996
ENSMUSG00000044452	Zfp507	zinc finger protein 507	-0.0651806	0.520008	0.999996	0.192454	0.0452949	0.97123	-0.154271	0.309739	0.999994	0.103363	0.332676	0.999996
ENSMUSG00000044501	Zfp758	zinc finger protein 758	0.206594	0.254939	0.86686	-0.178746	0.311318	0.890912	0.239087	0.393549	0.999994	-0.146253	0.46464	0.999996
ENSMUSG00000044617	Zbtb39	zinc finger and BTB domain containing 39	-0.136209	0.164522	0.999996	0.122079	0.20329	0.999999	-0.132698	0.382712	0.999994	0.12559	0.236928	0.999996
ENSMUSG00000044676	Zfp612	zinc finger protein 612	0.155256	0.580825	0.999996	0.665079	0.0153089	0.0675107	-0.420368	0.330984	0.999994	0.0894552	0.7795	0.999996
ENSMUSG00000044807	Zfp354c	zinc finger protein 354C	0.00729655	0.984142	0.999996	1.243	0.000634753	0.00284142	-0.755545	0.167148	0.999994	0.480159	0.157526	0.628632
ENSMUSG00000044876	Zfp444	zinc finger protein 444	0.0478106	0.699415	0.999996	0.305591	0.00763177	0.379663	0.00888023	0.967611	0.999994	0.266661	0.0299586	0.927878
ENSMUSG00000044934	Zfp367	zinc finger protein 367	-0.0729015	0.476802	0.999996	-0.252546	0.0112396	0.654139	0.100013	0.524968	0.999994	-0.0796321	0.475263	0.999996
ENSMUSG00000045251	Zfp688	zinc finger protein 688	0.120094	0.270579	0.999996	0.335138	0.00261392	0.243453	-0.014952	0.94685	0.999994	0.200092	0.0803027	0.999996
ENSMUSG00000045252	Zfp574	zinc finger protein 574	-0.363032	0.0073344	0.266012	0.0371864	0.788833	0.999999	-0.114492	0.578139	0.999994	0.285727	0.0418089	0.843536
ENSMUSG00000045268	Zfp691	zinc finger protein 691	0.294352	0.094596	0.573176	0.282184	0.0970867	0.538361	0.0942843	0.760872	0.999994	0.0821165	0.685808	0.999996
ENSMUSG00000045466	Zfp956	zinc finger protein 956	0.216382	0.0688404	0.880227	0.671432	4.15544e-06	0.000253812	-0.0142709	0.952829	0.999994	0.440779	0.00125163	0.13103
ENSMUSG00000045519	Zfp560	zinc finger protein 560	0.109058	0.449262	0.999996	-0.190009	0.171822	0.883871	0.00875511	0.973163	0.999994	-0.290312	0.0570158	0.831913
ENSMUSG00000045598	Zfp553	zinc finger protein 553	0.115682	0.33278	0.999996	0.420976	0.000752068	0.0652648	0.0247195	0.913608	0.999994	0.330014	0.0104952	0.569559
ENSMUSG00000045639	Zfp629	zinc finger protein 629	-0.0791942	0.541229	0.999996	0.460113	0.0005272	0.0364574	-0.129384	0.513857	0.999994	0.409923	0.00349411	0.236115
ENSMUSG00000045757	Zfp764	zinc finger protein 764	0.10668	0.495587	0.999996	-0.0429327	0.789722	0.999999	0.200436	0.391009	0.999994	0.0508236	0.779291	0.999996
ENSMUSG00000045842	Tgif2-ps2	TGFB-induced factor homeobox 2, pseudogene 2	0.165743	0.576041	0.999996	0.116893	0.682675	0.999999	0.271186	0.545041	0.999994	0.222336	0.466588	0.999996
ENSMUSG00000045991	Onecut2	one cut domain, family member 2	0.368777	0.0890857	0.422789	0.617403	0.00662311	0.0438211	-0.369094	0.297882	0.999994	-0.120468	0.629261	0.999996
ENSMUSG00000031441	Atp11a	ATPase, class VI, type 11A	-0.661908	1.33334e-07	2.16899e-05	-0.440131	1.1986e-05	0.00998875	-0.282863	0.0545583	0.999994	-0.0610853	0.517326	0.999996
ENSMUSG00000046185	Zfp84	zinc finger protein 84	-0.178354	0.0607708	0.999996	0.0565239	0.557099	0.999999	-0.089704	0.552446	0.999994	0.145174	0.154682	0.999996
ENSMUSG00000046311	Zfp62	zinc finger protein 62	0.0401861	0.675704	0.999996	0.0491945	0.592281	0.999999	2.91273e-05	0.999755	0.999994	0.00903753	0.936848	0.999996
ENSMUSG00000046351	Zfp322a	zinc finger protein 322A	-0.134701	0.208652	0.999996	-0.23288	0.0275581	0.7549	0.0418405	0.830864	0.999994	-0.0563384	0.656318	0.999996
ENSMUSG00000046541	Zfp526	zinc finger protein 526	-0.159333	0.156725	0.999996	0.341005	0.00345148	0.236328	-0.283701	0.123503	0.999994	0.216638	0.0726292	0.999996
ENSMUSG00000046556	Zfp319	zinc finger protein 319	-0.0148127	0.926261	0.999996	0.341299	0.0137399	0.289943	-0.1296	0.562359	0.999994	0.226512	0.124719	0.999996
ENSMUSG00000046658	Zfp316	zinc finger protein 316	-0.0238877	0.85229	0.999996	0.229205	0.0439593	0.760447	-0.207345	0.245594	0.999994	0.0457482	0.74052	0.999996
ENSMUSG00000046711	Hmga1	high mobility group AT-hook 1	0.137425	0.0868729	0.999996	0.0870877	0.272395	0.999999	0.0169396	0.912239	0.999994	-0.0333973	0.729717	0.999996
ENSMUSG00000046792	Zfp787	zinc finger protein 787	0.0760274	0.509888	0.999996	0.218747	0.0448701	0.816539	-0.0407432	0.844613	0.999994	0.101976	0.403592	0.999996
ENSMUSG00000046897	Zfp740	zinc finger protein 740	-0.0484789	0.575693	0.999996	0.271623	0.00170607	0.529943	-0.04126	0.774381	0.999994	0.278842	0.00331494	0.831062
ENSMUSG00000046962	Zbtb21	zinc finger and BTB domain containing 21	0.0522693	0.565029	0.999996	0.109275	0.199844	0.999999	-0.0773994	0.582333	0.999994	-0.0203938	0.849153	0.999996
ENSMUSG00000028266	Lmo4	LIM domain only 4	0.574606	2.47785e-08	1.7918e-05	0.79609	6.79067e-11	4.51555e-09	0.0202801	0.86821	0.999994	0.241764	0.00118113	0.999996
ENSMUSG00000047003	Zfp41	zinc finger protein 41	-0.157611	0.185925	0.999996	0.256383	0.0276778	0.62596	-0.100397	0.602297	0.999994	0.313597	0.015942	0.665534
ENSMUSG00000047036	Zfp445	zinc finger protein 445	-0.177352	0.0208636	0.999996	-0.143356	0.0536262	0.999999	-0.163582	0.166722	0.999994	-0.129586	0.111158	0.999996
ENSMUSG00000047141	Zfp654	zinc finger protein 654	-0.102238	0.470739	0.999996	-0.322996	0.0197123	0.352825	0.0214412	0.937862	0.999994	-0.199317	0.183012	0.999996
ENSMUSG00000047264	Zfp358	zinc finger protein 358	0.263434	0.00166555	0.65751	0.450338	3.45388e-06	0.00458968	-0.0571323	0.659722	0.999994	0.129771	0.111713	0.999996
ENSMUSG00000047371	Zfp768	zinc finger protein 768	0.193427	0.0588537	0.999996	0.441776	0.000102408	0.0240706	0.0792907	0.640106	0.999994	0.32764	0.00403833	0.522779
ENSMUSG00000047407	Tgif1	TGFB-induced factor homeobox 1	0.247353	0.000566712	0.798148	0.161996	0.0112961	0.999999	0.136804	0.169296	0.999994	0.0514466	0.468481	0.999996
ENSMUSG00000047412	Zbtb44	zinc finger and BTB domain containing 44	0.0342568	0.81492	0.999996	0.153336	0.232554	0.999999	0.00961162	0.969162	0.999994	0.128691	0.37101	0.999996
ENSMUSG00000047473	Zfp30	zinc finger protein 30	-0.0229702	0.877582	0.999996	0.154218	0.220955	0.999999	0.112888	0.602808	0.999994	0.290076	0.038698	0.833056
ENSMUSG00000047603	Zfp235	zinc finger protein 235	0.0733557	0.704581	0.999996	0.581032	0.00191336	0.0253748	-0.230001	0.413831	0.999994	0.277676	0.140485	0.910529
ENSMUSG00000047638	Nr1h4	nuclear receptor subfamily 1, group H, member 4	-0.277621	0.159599	0.646152	-0.125999	0.516002	0.999999	0.145946	0.647212	0.999994	0.297568	0.159889	0.86685
ENSMUSG00000047907	Tshz2	teashirt zinc finger family member 2	-0.427752	0.116814	0.404622	-0.055154	0.855998	0.999999	-0.197152	0.659121	0.999994	0.175447	0.582429	0.999996
ENSMUSG00000048012	Zfp473	zinc finger protein 473	-0.290618	0.0976487	0.583779	-0.230863	0.193935	0.720256	-0.350704	0.198807	0.999994	-0.29095	0.134891	0.870333
ENSMUSG00000026576	Atp1b1	ATPase, Na+/K+ transporting, beta 1 polypeptide	-0.87363	3.94706e-10	1.60215e-08	-0.653509	8.66751e-09	1.96347e-06	-0.111844	0.317548	0.999994	0.108277	0.165993	0.999996
ENSMUSG00000048280	Zfp738	zinc finger protein 738	-0.280148	0.0474719	0.593071	-0.197347	0.15296	0.860872	-0.141968	0.522379	0.999994	-0.0591669	0.729717	0.999996
ENSMUSG00000048349	Pou4f1	POU domain, class 4, transcription factor 1	0.0622906	0.894536	0.999996	1.51531	0.000498474	0.00187226	-0.52966	0.433796	0.999994	0.923359	0.0247682	0.150866
ENSMUSG00000048410	Zfp407	zinc finger protein 407	-0.342862	0.000341453	0.200017	-0.257864	0.0030471	0.628119	-0.0990719	0.442532	0.999994	-0.0140738	0.896049	0.999996
ENSMUSG00000048485	Zbtb8b	zinc finger and BTB domain containing 8b	-0.55084	0.0675553	0.25874	0.0208836	0.950404	0.999999	-0.133928	0.795519	0.999994	0.437796	0.176928	0.690152
ENSMUSG00000048562	Sp8	trans-acting transcription factor 8	-0.24872	0.299048	0.774676	-0.130934	0.609345	0.999999	-0.407081	0.274101	0.999994	-0.289294	0.277382	0.965286
ENSMUSG00000048756	Foxo3	forkhead box O3	-0.310396	0.127562	0.564643	0.00247713	0.992013	0.999999	-0.19967	0.533846	0.999994	0.113203	0.630739	0.999996
ENSMUSG00000048763	Hoxb3	homeobox B3	-0.556113	6.92121e-05	0.00661862	-0.398082	0.00152159	0.104099	-0.3672	0.0686312	0.999994	-0.20917	0.106533	0.999996
ENSMUSG00000048897	Zfp710	zinc finger protein 710	-0.240332	0.0200787	0.788879	0.162803	0.0978528	0.999999	-0.144034	0.355716	0.999994	0.259101	0.0194654	0.977034
ENSMUSG00000048921	Zfp689	zinc finger protein 689	0.360831	0.0746983	0.41574	0.540947	0.00753359	0.0641979	0.0021475	0.995632	0.999994	0.182263	0.397928	0.999996
ENSMUSG00000049295	Zfp219	zinc finger protein 219	0.023458	0.808516	0.999996	0.406173	5.23041e-05	0.0330864	-0.0944426	0.493018	0.999994	0.288272	0.00361224	0.758123
ENSMUSG00000049321	Zfp2	zinc finger protein 2	0.277159	0.015262	0.588394	0.192817	0.0682264	0.93956	0.276298	0.125516	0.999994	0.191956	0.0985384	0.999996
ENSMUSG00000049421	Zfp260	zinc finger protein 260	-0.100238	0.190087	0.999996	0.00368297	0.966388	0.999999	0.0417051	0.753762	0.999994	0.145626	0.0766339	0.999996
ENSMUSG00000049470	Aff4	AF4/FMR2 family, member 4	-0.236846	0.0313875	0.796358	-0.0475158	0.678364	0.999999	-0.144792	0.390349	0.999994	0.0445375	0.734432	0.999996
ENSMUSG00000049532	Sall2	spalt like transcription factor 2	0.0473139	0.733104	0.999996	0.519152	0.000233672	0.0137885	-0.201854	0.317366	0.999994	0.269983	0.0461237	0.914098
ENSMUSG00000049577	Zfpm1	zinc finger protein, multitype 1	-0.240986	0.0138475	0.793117	0.203528	0.0287174	0.932039	-0.122935	0.400894	0.999994	0.321578	0.00319498	0.543272
ENSMUSG00000049600	Zbtb45	zinc finger and BTB domain containing 45	-0.190598	0.114894	0.979261	0.0501881	0.693344	0.999999	-0.106001	0.586521	0.999994	0.134785	0.307413	0.999996
ENSMUSG00000049604	Hoxb13	homeobox B13	0.435432	0.00246752	0.110083	0.294227	0.024798	0.454223	0.131692	0.544845	0.999994	-0.00951249	0.955074	0.999996
ENSMUSG00000049672	Zbtb14	zinc finger and BTB domain containing 14	-0.121305	0.221072	0.999996	-0.0570072	0.572024	0.999999	-0.00437304	0.980904	0.999994	0.0599253	0.601445	0.999996
ENSMUSG00000049728	Zfp668	zinc finger protein 668	-0.228493	0.0502919	0.827874	0.0182943	0.88787	0.999999	-0.161242	0.367299	0.999994	0.0855452	0.516779	0.999996
ENSMUSG00000049739	Zfp646	zinc finger protein 646	-0.181676	0.148817	0.999996	0.0666481	0.611434	0.999999	-0.223689	0.250394	0.999994	0.0246353	0.876529	0.999996
ENSMUSG00000049755	Zfp672	zinc finger protein 672	-0.0862366	0.346901	0.999996	-0.0626775	0.498048	0.999999	-0.159286	0.254526	0.999994	-0.135727	0.166403	0.999996
ENSMUSG00000049823	Zbtb12	zinc finger and BTB domain containing 12	0.226968	0.10329	0.808946	0.878857	1.39594e-06	2.85164e-05	-0.266241	0.228734	0.999994	0.385648	0.0106719	0.374781
ENSMUSG00000049878	Rlf	rearranged L-myc fusion sequence	-0.151708	0.138506	0.999996	-0.188735	0.0612978	0.971538	-0.0438964	0.813079	0.999994	-0.0809234	0.484553	0.999996
ENSMUSG00000050064	Zfp697	zinc finger protein 697	-0.114964	0.332192	0.999996	-0.0208488	0.87326	0.999999	-0.0297126	0.890567	0.999994	0.0644025	0.639173	0.999996
ENSMUSG00000050240	Hic2	hypermethylated in cancer 2	-0.735961	8.59578e-05	0.00205656	-0.0669683	0.683915	0.999999	-0.369431	0.133583	0.999994	0.299562	0.0819405	0.810695
ENSMUSG00000029798	Herc6	hect domain and RLD 6	0.425751	1.94915e-05	0.0206898	0.644059	3.75041e-08	8.07536e-06	0.0259235	0.864411	0.999994	0.244232	0.00579099	0.999996
ENSMUSG00000050397	Foxl2	forkhead box L2	-0.16885	0.258163	0.999996	0.0859459	0.573126	0.999999	-0.165797	0.47684	0.999994	0.0889988	0.606016	0.999996
ENSMUSG00000050605	Zfp61	zinc finger protein 61	0.0681464	0.714138	0.999996	0.182841	0.268928	0.882206	0.110837	0.702171	0.999994	0.225532	0.21487	0.999996
ENSMUSG00000050619	Zscan29	zinc finger SCAN domains 29	0.0342864	0.72867	0.999996	0.390032	0.000140309	0.0598903	-0.167275	0.238873	0.999994	0.188471	0.0526097	0.999996
ENSMUSG00000050714	Zbtb26	zinc finger and BTB domain containing 26	0.0905702	0.294607	0.999996	0.23177	0.00791069	0.798125	-0.147592	0.270919	0.999994	-0.00639181	0.953657	0.999996
ENSMUSG00000050846	Zfp623	zinc finger protein 623	0.101893	0.340028	0.999996	0.354514	0.00124438	0.168764	0.0674763	0.705892	0.999994	0.320097	0.00620195	0.58466
ENSMUSG00000050855	Zfp940	zinc finger protein 940	0.15987	0.363245	0.999996	-0.0415749	0.823129	0.999999	0.26654	0.318746	0.999994	0.065095	0.75097	0.999996
ENSMUSG00000050954	Zfp169	zinc finger protein 169	0.0713031	0.68836	0.999996	0.15994	0.32581	0.954543	-0.0365821	0.908077	0.999994	0.0520545	0.794644	0.999996
ENSMUSG00000051034	Zfp11	zinc finger protein 11	0.131448	0.226623	0.999996	0.260741	0.0149352	0.60358	0.0341164	0.869157	0.999994	0.163409	0.154682	0.999996
ENSMUSG00000051037	Zfp455	zinc finger protein 455	0.113717	0.628082	0.999996	0.0346806	0.887117	0.999999	0.0989605	0.802424	0.999994	0.0199237	0.944016	0.999996
ENSMUSG00000051149	Adnp	activity-dependent neuroprotective protein	-0.269526	0.0138383	0.62524	-0.0649589	0.55232	0.999999	-0.282254	0.109876	0.999994	-0.0776871	0.521508	0.999996
ENSMUSG00000051184	Zfp524	zinc finger protein 524	0.220983	0.0851591	0.846272	0.215852	0.0847301	0.803129	-0.000501899	0.998256	0.999994	-0.00563266	0.972803	0.999996
ENSMUSG00000051341	Zfp52	zinc finger protein 52	-0.192322	0.0594103	0.999996	-0.290811	0.0052705	0.433518	-0.0277407	0.882876	0.999994	-0.12623	0.258864	0.999996
ENSMUSG00000051351	Zfp46	zinc finger protein 46	-0.0184829	0.911728	0.999996	0.241997	0.0875541	0.680921	-0.148336	0.523282	0.999994	0.112145	0.487193	0.999996
ENSMUSG00000051367	Six1	sine oculis-related homeobox 1	-0.189567	0.017272	0.999996	0.214582	0.00601255	0.931791	-0.0426244	0.751385	0.999994	0.361525	0.000239528	0.208519
ENSMUSG00000051413	Plagl2	pleiomorphic adenoma gene-like 2	-0.0898628	0.355605	0.999996	0.0968369	0.309919	0.999999	-0.19932	0.181986	0.999994	-0.0126199	0.91863	0.999996
ENSMUSG00000051451	Crebzf	CREB/ATF bZIP transcription factor	-0.124227	0.289202	0.999996	0.288545	0.0129691	0.462542	-0.0626909	0.75538	0.999994	0.350081	0.00739348	0.457555
ENSMUSG00000051469	Zfp24	zinc finger protein 24	-0.037184	0.642357	0.999996	-0.154698	0.0368274	0.999999	0.0338604	0.800083	0.999994	-0.0836539	0.308559	0.999996
ENSMUSG00000051510	Mafg	v-maf musculoaponeurotic fibrosarcoma oncogene family, protein G (avian)	0.094239	0.166566	0.999996	0.455478	5.98849e-07	0.00162064	-0.0571828	0.606363	0.999994	0.304056	0.000364143	0.553288
ENSMUSG00000051550	Zfp579	zinc finger protein 579	0.0672305	0.693293	0.999996	0.288513	0.0633156	0.501245	-0.155042	0.545624	0.999994	0.0662402	0.724766	0.999996
ENSMUSG00000051817	Sox12	SRY (sex determining region Y)-box 12	0.0889297	0.402729	0.999996	0.423296	0.000245338	0.0430501	-0.195546	0.228944	0.999994	0.138821	0.211821	0.999996
ENSMUSG00000051977	Prdm9	PR domain containing 9	0.209815	0.0421722	0.940062	0.398777	0.000377151	0.0697036	-0.11416	0.486781	0.999994	0.0748016	0.510974	0.999996
ENSMUSG00000052040	Klf13	Kruppel-like factor 13	-0.370303	0.00304357	0.211713	-0.250337	0.0318627	0.655531	-0.213496	0.232897	0.999994	-0.0935301	0.483609	0.999996
ENSMUSG00000052056	Zfp217	zinc finger protein 217	-0.208406	0.0302878	0.967811	-0.0881482	0.352067	0.999999	-0.167401	0.251888	0.999994	-0.047143	0.675836	0.999996
ENSMUSG00000052135	Foxo6	forkhead box O6	-0.221924	0.553565	0.980501	0.0099307	0.980766	0.999999	-0.131796	0.841289	0.999994	0.100058	0.822432	0.999996
ENSMUSG00000052271	Bhlha15	basic helix-loop-helix family, member a15	-0.324468	0.349088	0.750061	0.270052	0.41718	0.784689	-0.180673	0.757493	0.999994	0.413847	0.259042	0.840885
ENSMUSG00000052446	Zfp961	zinc finger protein 961	0.203919	0.0623969	0.951592	0.167132	0.115179	0.999999	0.040671	0.842235	0.999994	0.00388406	0.97759	0.999996
ENSMUSG00000052534	Pbx1	pre B cell leukemia homeobox 1	-0.492372	1.00679e-05	0.00488156	-0.304223	0.000993552	0.329858	-0.15305	0.247914	0.999994	0.0350988	0.739148	0.999996
ENSMUSG00000052675	Zfp112	zinc finger protein 112	0.0303596	0.922895	0.999996	0.524657	0.0489391	0.179883	-0.271414	0.538255	0.999994	0.222884	0.452449	0.999996
ENSMUSG00000046179	E2f8	E2F transcription factor 8	-0.619224	3.4562e-08	1.18676e-05	-1.13719	2.55872e-12	4.20297e-11	-0.13874	0.19366	0.999994	-0.656708	3.39365e-07	6.48932e-05
ENSMUSG00000052751	Repin1	replication initiator 1	0.03679	0.737315	0.999996	0.514632	1.58503e-05	0.00351604	0.0181862	0.928085	0.999994	0.496028	0.000135894	0.0276387
ENSMUSG00000052763	Zfp212	Zinc finger protein 212	-0.0343705	0.724854	0.999996	-0.0316728	0.740278	0.999999	0.109557	0.428392	0.999994	0.112255	0.248936	0.999996
ENSMUSG00000052837	Junb	jun B proto-oncogene	-0.168363	0.16217	0.999996	-0.134491	0.257074	0.999999	0.0348865	0.877386	0.999994	0.0687591	0.626355	0.999996
ENSMUSG00000052942	Glis3	GLIS family zinc finger 3	-0.488963	0.00368644	0.0772463	-0.345276	0.0256405	0.30619	-0.218723	0.354653	0.999994	-0.0750365	0.678018	0.999996
ENSMUSG00000053007	Creb5	cAMP responsive element binding protein 5	-0.264903	0.0198389	0.651103	-0.760921	5.88594e-07	2.64089e-05	0.0233631	0.911582	0.999994	-0.472655	0.000742731	0.0796808
ENSMUSG00000053080	2700081O15Rik	RIKEN cDNA 2700081O15 gene	-0.0715839	0.51283	0.999996	0.0455208	0.684288	0.999999	-0.151779	0.355	0.999994	-0.0346748	0.788142	0.999996
ENSMUSG00000053347	Zfp943	zinc finger prtoein 943	0.0883956	0.564368	0.999996	-0.292623	0.0424281	0.474937	0.185714	0.410519	0.999994	-0.195304	0.218947	0.999996
ENSMUSG00000053390	Zfp952	zinc finger protein 952	-0.153498	0.230903	0.999996	0.086983	0.501842	0.999999	-0.166336	0.40088	0.999994	0.0741447	0.620195	0.999996
ENSMUSG00000053477	Tcf4	transcription factor 4	-0.100334	0.286932	0.999996	-0.018012	0.863685	0.999999	-0.11756	0.414213	0.999994	-0.0352388	0.755186	0.999996
ENSMUSG00000053552	Ebf4	early B cell factor 4	0.0124091	0.95083	0.999996	0.969703	5.97388e-06	7.69164e-05	-0.425363	0.137427	0.999994	0.531931	0.0051474	0.120437
ENSMUSG00000053600	Zfp472	zinc finger protein 472	0.37996	0.0215018	0.290607	0.01894	0.915728	0.999999	0.352093	0.167035	0.999994	-0.00892617	0.965419	0.999996
ENSMUSG00000024359	Hspa9	heat shock protein 9	0.668225	1.94905e-08	3.79921e-06	0.881681	1.18044e-10	4.57346e-09	0.107741	0.336658	0.999994	0.321197	0.000401648	0.430652
ENSMUSG00000054272	Zscan4c	zinc finger and SCAN domain containing 4C	-1.47237	0.0461765	0.13718	-2.03109	0.00850485	0.0208667	0.142863	0.902924	0.999994	-0.415863	0.684015	0.999996
ENSMUSG00000054381	Zfp747	zinc finger protein 747	-0.0705566	0.621947	0.999996	-0.0865737	0.526847	0.999999	0.00584917	0.981175	0.999994	-0.0101678	0.953632	0.999996
ENSMUSG00000054519	Zfp867	zinc finger protein 867	0.10413	0.373765	0.999996	0.0368068	0.763507	0.999999	0.13832	0.436814	0.999994	0.070996	0.588113	0.999996
ENSMUSG00000054648	Zfp869	zinc finger protein 869	-0.0230557	0.811312	0.999996	0.103518	0.218421	0.999999	0.0825097	0.552446	0.999994	0.209084	0.0262725	0.999996
ENSMUSG00000054715	Zscan22	zinc finger and SCAN domain containing 22	-0.117718	0.375213	0.999996	-0.0417701	0.762429	0.999999	0.0824128	0.705188	0.999994	0.15836	0.261265	0.999996
ENSMUSG00000054716	Zfp771	zinc finger protein 771	0.442472	0.00678896	0.144451	0.336091	0.0296127	0.337632	0.0228522	0.944331	0.999994	-0.0835293	0.640623	0.999996
ENSMUSG00000054717	Hmgb2	high mobility group box 2	0.159914	0.0888447	0.999996	-0.610092	9.62504e-07	0.000163377	0.217379	0.149738	0.999994	-0.552627	3.22424e-05	0.0063601
ENSMUSG00000054737	Zfp182	zinc finger protein 182	0.299857	0.123144	0.577819	0.311921	0.101135	0.465996	-0.0129318	0.972068	0.999994	-0.00086773	0.997424	0.999996
ENSMUSG00000054893	Zfp667	zinc finger protein 667	0.287191	0.226333	0.667871	0.502364	0.0278786	0.141164	0.0783175	0.862973	0.999994	0.29349	0.233724	0.919224
ENSMUSG00000054939	Zfp174	zinc finger protein 174	0.200685	0.240533	0.885432	0.391042	0.0212511	0.217291	-0.127583	0.659184	0.999994	0.0627744	0.755186	0.999996
ENSMUSG00000054967	Zfp647	zinc finger protein 647	0.338554	0.0132468	0.356225	0.414311	0.00246341	0.100582	0.0066181	0.978681	0.999994	0.0823755	0.578297	0.999996
ENSMUSG00000055053	Nfic	nuclear factor I/C	-0.418399	9.35405e-05	0.0439085	-0.321696	0.000893686	0.253033	-0.228083	0.119354	0.999994	-0.13138	0.179235	0.999996
ENSMUSG00000055116	Arntl	aryl hydrocarbon receptor nuclear translocator-like	-0.12755	0.172497	0.999996	-0.239	0.0105974	0.741799	0.0897667	0.544189	0.999994	-0.021683	0.852599	0.999996
ENSMUSG00000006611	Hfe	hemochromatosis	0.548224	0.0011856	0.0334144	0.761487	2.01484e-05	0.000448085	0.0993983	0.711464	0.999994	0.312661	0.0465995	0.730601
ENSMUSG00000055150	Zfp78	zinc finger protein 78	-0.535427	0.141233	0.409139	0.225405	0.528307	0.905453	-0.241713	0.682673	0.999994	0.519119	0.18288	0.672688
ENSMUSG00000055240	Zfp101	zinc finger protein 101	-0.0928074	0.24849	0.999996	-0.411652	1.99918e-05	0.0213442	0.0109394	0.946822	0.999994	-0.307905	0.00142454	0.58466
ENSMUSG00000055305	Zfp93	zinc finger protein 93	0.295699	0.0159251	0.506007	0.431285	0.000669873	0.0554272	0.0422382	0.852102	0.999994	0.177825	0.154736	0.999996
ENSMUSG00000070034	Sp110	Sp110 nuclear body protein	-1.16873	0.00116996	0.00721186	-1.10459	0.00224622	0.00961672	-0.517543	0.286637	0.999994	-0.453398	0.24973	0.813177
ENSMUSG00000055341	Zfp457	zinc finger protein 457	-0.591758	0.09321	0.310038	0.00354908	0.994327	0.999999	-0.832571	0.149738	0.999994	-0.237264	0.582716	0.999996
ENSMUSG00000055435	Maf	avian musculoaponeurotic fibrosarcoma oncogene homolog	-1.0254	0.190956	0.437968	-1.48864	0.0357598	0.0841301	0.679377	0.520838	0.999994	0.216137	0.834168	0.999996
ENSMUSG00000055480	Zfp458	zinc finger protein 458	0.0282295	0.914453	0.999996	-0.0796393	0.740697	0.999999	0.169046	0.653682	0.999994	0.0611768	0.82862	0.999996
ENSMUSG00000055560	Zfp459	zinc finger protein 459	0.282743	0.19173	0.653652	0.393573	0.0635175	0.294689	-0.0516831	0.901899	0.999994	0.059147	0.821565	0.999996
ENSMUSG00000055633	Zfp580	zinc finger protein 580	0.195594	0.302706	0.898728	0.160914	0.386165	0.937524	0.0804555	0.81545	0.999994	0.0457755	0.841692	0.999996
ENSMUSG00000055799	Tcf7l1	transcription factor 7 like 1 (T cell specific, HMG box)	-0.0916104	0.512362	0.999996	-0.0120786	0.938199	0.999999	-0.167451	0.423592	0.999994	-0.0879194	0.573777	0.999996
ENSMUSG00000055817	Mta3	metastasis associated 3	0.152085	0.0554563	0.999996	0.148061	0.0540831	0.999999	0.114284	0.351725	0.999994	0.110261	0.190563	0.999996
ENSMUSG00000055835	Zfp1	zinc finger protein 1	-0.048632	0.629953	0.999996	0.0399633	0.687359	0.999999	0.0151654	0.936574	0.999994	0.103761	0.314928	0.999996
ENSMUSG00000055991	Zkscan5	zinc finger with KRAB and SCAN domains 5	-0.311954	0.0155973	0.445673	-0.40856	0.0018188	0.0976237	0.0608961	0.776381	0.999994	-0.0357101	0.821368	0.999996
ENSMUSG00000056014	A430033K04Rik	RIKEN cDNA A430033K04 gene	-0.169978	0.146591	0.999996	-0.0128025	0.924552	0.999999	-0.275535	0.145121	0.999994	-0.11836	0.365331	0.999996
ENSMUSG00000056019	Zfp709	zinc finger protein 709	0.076303	0.829989	0.999996	0.0280727	0.939608	0.999999	-0.167055	0.766881	0.999994	-0.215285	0.557625	0.999996
ENSMUSG00000056216	Cebpg	CCAAT/enhancer binding protein (C/EBP), gamma	0.348186	5.32233e-06	0.0767257	0.329044	5.47206e-06	0.104	0.0075947	0.950121	0.999994	-0.011547	0.873289	0.999996
ENSMUSG00000056383	AI987944	expressed sequence AI987944	-0.0884005	0.367507	0.999996	-0.0865464	0.357784	0.999999	0.148556	0.315869	0.999994	0.15041	0.14494	0.999996
ENSMUSG00000056459	Zbtb25	zinc finger and BTB domain containing 25	0.320459	0.000575533	0.299132	0.253991	0.00306238	0.655485	0.0163861	0.920004	0.999994	-0.0500821	0.595529	0.999996
ENSMUSG00000056493	Foxk1	forkhead box K1	-0.161895	0.0813792	0.999996	0.132284	0.145998	0.999999	-0.182556	0.20452	0.999994	0.111622	0.269774	0.999996
ENSMUSG00000056501	Cebpb	CCAAT/enhancer binding protein (C/EBP), beta	0.528692	0.0169277	0.127852	0.812622	0.000823845	0.00583119	-0.00198823	0.996008	0.999994	0.281942	0.201923	0.938731
ENSMUSG00000056592	Zfp658	zinc finger protein 658	-0.489878	0.16952	0.467941	-0.719591	0.0486043	0.149648	-0.144362	0.819654	0.999994	-0.374075	0.374476	0.999996
ENSMUSG00000056648	Hoxb8	homeobox B8	-0.345492	0.00283638	0.268992	-0.399686	0.000668206	0.0814859	-0.0986737	0.563758	0.999994	-0.152868	0.199272	0.999996
ENSMUSG00000056673	Kdm5d	lysine (K)-specific demethylase 5D	-0.0341824	0.622889	0.999996	0.0687767	0.286447	0.999999	0.0142255	0.90976	0.999994	0.117185	0.0961196	0.999996
ENSMUSG00000027615	Hps3	HPS3, biogenesis of lysosomal organelles complex 2 subunit 1	0.48767	7.86597e-05	0.0151106	0.697962	3.97489e-07	3.1674e-05	0.114587	0.486781	0.999994	0.32488	0.0042369	0.540994
ENSMUSG00000056758	Hmga2	high mobility group AT-hook 2	-0.262485	0.063199	0.667772	-0.635426	0.000137105	0.00312563	0.00855326	0.973179	0.999994	-0.364387	0.0208589	0.47628
ENSMUSG00000057093	Zfp607b	zinc finger protein 607B	0.0234047	0.914787	0.999996	-0.254288	0.181188	0.649574	-0.0372958	0.920121	0.999994	-0.314988	0.13067	0.800421
ENSMUSG00000057098	Ebf1	early B cell factor 1	-0.453303	0.0472015	0.26173	-0.122476	0.599126	0.999999	-0.177148	0.627958	0.999994	0.153679	0.559674	0.999996
ENSMUSG00000057101	Zfp180	zinc finger protein 180	0.145521	0.150595	0.999996	0.279896	0.00618903	0.492081	0.0794143	0.636023	0.999994	0.21379	0.0481248	0.999996
ENSMUSG00000057156	Homez	homeodomain leucine zipper-encoding gene	-0.285496	0.0493477	0.575999	0.117754	0.408956	0.999999	-0.147929	0.515727	0.999994	0.255321	0.0995561	0.994102
ENSMUSG00000057396	Zfp759	zinc finger protein 759	0.141549	0.304929	0.999996	0.0643166	0.647517	0.999999	0.118	0.59409	0.999994	0.0407674	0.806274	0.999996
ENSMUSG00000057406	Nsd2	nuclear receptor binding SET domain protein 2	-0.262346	0.000719544	0.666785	-0.261731	0.000536594	0.602136	-0.0756045	0.489256	0.999994	-0.0749893	0.326839	0.999996
ENSMUSG00000057409	Zfp53	zinc finger protein 53	-0.146665	0.130192	0.999996	-0.16419	0.0860478	0.999999	-0.105344	0.489237	0.999994	-0.122868	0.248155	0.999996
ENSMUSG00000057469	E2f6	E2F transcription factor 6	-0.189046	0.0650404	0.999996	-0.0299112	0.784379	0.999999	0.0260555	0.889568	0.999994	0.18519	0.0915455	0.999996
ENSMUSG00000057551	Zfp317	zinc finger protein 317	0.106694	0.276258	0.999996	0.232481	0.015755	0.773228	0.0390488	0.828936	0.999994	0.164836	0.110427	0.999996
ENSMUSG00000057637	Prdm2	PR domain containing 2, with ZNF domain	-0.275538	0.00368142	0.581546	0.0569524	0.53162	0.999999	-0.228876	0.116731	0.999994	0.103615	0.28869	0.999996
ENSMUSG00000057691	Zfp746	zinc finger protein 746	0.0467631	0.718813	0.999996	0.607494	1.89331e-05	0.00133002	-0.0557809	0.794813	0.999994	0.50495	0.000541092	0.0518427
ENSMUSG00000057835	Zfp119a	zinc finger protein 119a	0.636819	0.00601497	0.0536827	-0.153127	0.497958	0.962895	0.235425	0.511999	0.999994	-0.554521	0.0207586	0.205229
ENSMUSG00000057842	Zfp595	zinc finger protein 595	0.0302053	0.880083	0.999996	-0.0251987	0.899931	0.999999	-0.0640288	0.846127	0.999994	-0.119433	0.555105	0.999996
ENSMUSG00000057894	Zfp329	zinc finger protein 329	0.0488755	0.709212	0.999996	-0.00681366	0.961401	0.999999	-0.136858	0.47691	0.999994	-0.192547	0.142076	0.999996
ENSMUSG00000057982	Zfp809	zinc finger protein 809	-0.0517973	0.548459	0.999996	0.0163613	0.85859	0.999999	-0.0322563	0.831805	0.999994	0.0359024	0.716615	0.999996
ENSMUSG00000058093	Zfp729b	zinc finger protein 729b	0.154222	0.233801	0.999996	-0.000731463	0.996392	0.999999	0.136562	0.504942	0.999994	-0.018391	0.910179	0.999996
ENSMUSG00000058192	Zfp846	zinc finger protein 846	-0.076531	0.549932	0.999996	9.07196e-06	0.999939	0.999999	-0.0878665	0.667615	0.999994	-0.0113265	0.943101	0.999996
ENSMUSG00000058239	Usf2	upstream transcription factor 2	0.16404	0.0436191	0.999996	0.16751	0.034674	0.999999	0.0765502	0.554163	0.999994	0.0800203	0.364669	0.999996
ENSMUSG00000058291	Zfp68	zinc finger protein 68	0.186481	0.0174156	0.999996	-0.0159302	0.851847	0.999999	0.178251	0.146207	0.999994	-0.0241601	0.796517	0.999996
ENSMUSG00000058331	Zfp85	zinc finger protein 85	0.131311	0.633764	0.999996	-0.255235	0.301243	0.704724	0.430631	0.274615	0.999994	0.0440843	0.891911	0.999996
ENSMUSG00000058402	Zfp420	zinc finger protein 420	-0.0160554	0.948704	0.999996	0.527093	0.0131231	0.0899545	-0.21741	0.528968	0.999994	0.325738	0.148036	0.788705
ENSMUSG00000058440	Nrf1	nuclear respiratory factor 1	0.158214	0.0386598	0.999996	0.0168976	0.840271	0.999999	0.102097	0.386774	0.999994	-0.039219	0.658115	0.999996
ENSMUSG00000058638	Zfp110	zinc finger protein 110	0.28939	0.0020487	0.490867	0.250618	0.00451403	0.676154	0.118832	0.380245	0.999994	0.0800594	0.396686	0.999996
ENSMUSG00000058748	Zfp958	zinc finger protein 958	0.285089	0.0581727	0.581638	0.0376544	0.817153	0.999999	0.136621	0.57123	0.999994	-0.110813	0.506504	0.999996
ENSMUSG00000058756	Thra	thyroid hormone receptor alpha	-0.123104	0.233518	0.999996	0.06801	0.512903	0.999999	-0.07201	0.674905	0.999994	0.119104	0.287056	0.999996
ENSMUSG00000058881	Zfp516	zinc finger protein 516	-0.223068	0.0285979	0.882508	0.0837019	0.406224	0.999999	-0.248338	0.127582	0.999994	0.0584326	0.619908	0.999996
ENSMUSG00000058886	Deaf1	DEAF1, transcription factor	-0.276243	0.01889	0.594208	-0.123922	0.275354	0.999999	-0.126019	0.482904	0.999994	0.0263008	0.855831	0.999996
ENSMUSG00000058900	Rsl1	regulator of sex limited protein 1	0.0510615	0.819074	0.999996	-0.365702	0.060629	0.326161	0.271025	0.377841	0.999994	-0.145738	0.523457	0.999996
ENSMUSG00000021266	Wars	tryptophanyl-tRNA synthetase	0.66033	1.23626e-08	2.92591e-06	0.869684	7.50767e-11	3.20114e-09	0.032827	0.790617	0.999994	0.242182	0.00253758	0.999996
ENSMUSG00000059423	Zfp933	zinc finger protein 933	0.0514553	0.697395	0.999996	-0.014267	0.917944	0.999999	0.0546346	0.803806	0.999994	-0.0110877	0.944108	0.999996
ENSMUSG00000059436	Max	Max protein	-0.0938543	0.192055	0.999996	-0.0230774	0.765655	0.999999	0.0345598	0.783681	0.999994	0.105337	0.17332	0.999996
ENSMUSG00000059475	Zfp426	zinc finger protein 426	0.150771	0.130939	0.999996	0.100993	0.305528	0.999999	0.0291723	0.877688	0.999994	-0.0206066	0.867416	0.999996
ENSMUSG00000059552	Trp53	transformation related protein 53	0.199287	0.00319652	0.999996	0.155956	0.0140005	0.999999	0.055354	0.590355	0.999994	0.0120231	0.879729	0.999996
ENSMUSG00000059689	Zfp637	zinc finger protein 637	0.235825	0.0256647	0.806471	0.0268642	0.812585	0.999999	0.0916179	0.588587	0.999994	-0.117343	0.296353	0.999996
ENSMUSG00000059824	Dbp	D site albumin promoter binding protein	0.465638	0.00011584	0.0241995	0.353614	0.00107855	0.166209	0.0731348	0.674123	0.999994	-0.038889	0.746946	0.999996
ENSMUSG00000059839	Zfp874b	zinc finger protein 874b	0.117893	0.514284	0.999996	0.377227	0.0264155	0.250513	-0.0087744	0.978428	0.999994	0.250559	0.170769	0.999996
ENSMUSG00000059842	Zfp341	zinc finger protein 341	0.363463	0.00604821	0.255353	0.44372	0.000857501	0.0526043	0.0525441	0.824157	0.999994	0.132801	0.319013	0.999996
ENSMUSG00000059878	Zfp422	zinc finger protein 422	-0.107312	0.145856	0.999996	-0.309655	0.000173475	0.259442	0.0919611	0.414236	0.999994	-0.110382	0.167713	0.999996
ENSMUSG00000059897	Zfp930	zinc finger protein 930	0.449177	0.00014195	0.0330106	0.226288	0.0214946	0.802498	0.28797	0.0914086	0.999994	0.0650805	0.56462	0.999996
ENSMUSG00000059975	Zfp74	zinc finger protein 74	-0.0185221	0.911307	0.999996	0.0393311	0.798707	0.999999	0.128518	0.577153	0.999994	0.186371	0.227432	0.999996
ENSMUSG00000060261	Gtf2i	general transcription factor II I	-0.0219763	0.777482	0.999996	0.141783	0.0419354	0.999999	0.0131153	0.924825	0.999994	0.176875	0.0225134	0.999996
ENSMUSG00000060301	2610008E11Rik	RIKEN cDNA 2610008E11 gene	0.270596	0.00389747	0.610012	0.284961	0.00181381	0.44437	0.135979	0.325867	0.999994	0.150344	0.106242	0.999996
ENSMUSG00000060336	Zfp937	zinc finger protein 937	-0.179228	0.21379	0.979261	-0.141918	0.308652	0.999999	0.118584	0.60535	0.999994	0.155894	0.320911	0.999996
ENSMUSG00000060397	Zfp128	zinc finger protein 128	0.112509	0.697366	0.999996	0.464531	0.0703213	0.247934	-0.00837273	0.986967	0.999994	0.343649	0.220728	0.841457
ENSMUSG00000060427	Zfp868	zinc finger protein 868	-0.00298322	0.971183	0.999996	-0.0916767	0.19901	0.999999	0.0769953	0.505885	0.999994	-0.0116982	0.899742	0.999996
ENSMUSG00000060510	Zfp266	zinc finger protein 266	-0.0021997	0.988582	0.999996	-0.0965396	0.484989	0.999999	0.010665	0.967289	0.999994	-0.0836749	0.598413	0.999996
ENSMUSG00000060601	Nr1h2	nuclear receptor subfamily 1, group H, member 2	0.0658841	0.473377	0.999996	0.105355	0.226131	0.999999	0.0920974	0.516065	0.999994	0.131568	0.168204	0.999996
ENSMUSG00000060862	Zbtb40	zinc finger and BTB domain containing 40	-0.234438	0.0743214	0.787921	-0.127689	0.326638	0.999999	-0.0962434	0.656976	0.999994	0.0105052	0.951099	0.999996
ENSMUSG00000060969	Irx1	Iroquois homeobox 1	-0.0888578	0.568727	0.999996	-7.16822e-05	0.999675	0.999999	0.041108	0.882283	0.999994	0.129894	0.430276	0.999996
ENSMUSG00000061079	Zfp143	zinc finger protein 143	-0.189963	0.0540872	0.999996	-0.0435072	0.669461	0.999999	0.0429273	0.805778	0.999994	0.189383	0.0727007	0.999996
ENSMUSG00000061371	Zfp873	zinc finger protein 873	0.0197274	0.885769	0.999996	-0.0872944	0.473423	0.999999	-0.0249759	0.914012	0.999994	-0.131998	0.31637	0.999996
ENSMUSG00000061374	Fiz1	Flt3 interacting zinc finger protein 1	0.0121528	0.901969	0.999996	0.286308	0.00143	0.432825	-0.00394226	0.980067	0.999994	0.270213	0.00515504	0.895599
ENSMUSG00000061544	Zfp229	zinc finger protein 229	-0.0783407	0.645012	0.999996	0.0720787	0.665091	0.999999	-0.0675147	0.815729	0.999994	0.0829046	0.657046	0.999996
ENSMUSG00000061894	Zscan20	zinc finger and SCAN domains 20	0.0802186	0.650868	0.999996	0.244911	0.131331	0.66885	-0.112503	0.691371	0.999994	0.0521893	0.795095	0.999996
ENSMUSG00000061898	Rbak	RB-associated KRAB zinc finger	0.0469593	0.683227	0.999996	0.0188061	0.8747	0.999999	0.0229513	0.910977	0.999994	-0.00520183	0.969951	0.999996
ENSMUSG00000062012	Zfp13	zinc finger protein 13	0.342348	0.0291011	0.383898	0.570682	0.000508774	0.0132717	0.0673256	0.813243	0.999994	0.29566	0.0649875	0.815903
ENSMUSG00000062040	Zfp27	zinc finger protein 27	0.180882	0.165791	0.995932	0.253888	0.0438999	0.635238	0.117327	0.57849	0.999994	0.190333	0.165502	0.999996
ENSMUSG00000062101	Zfp119b	zinc finger protein 119b	0.339095	0.0326055	0.398805	-0.0273539	0.875833	0.999999	0.14999	0.554163	0.999994	-0.216459	0.193991	0.999996
ENSMUSG00000062116	Zfp954	zinc finger protein 954	0.122093	0.379718	0.999996	-0.148707	0.258796	0.999999	0.264598	0.206508	0.999994	-0.00620079	0.971846	0.999996
ENSMUSG00000062175	Tgif2	TGFB-induced factor homeobox 2	-0.0121983	0.914655	0.999996	0.301875	0.00299335	0.36924	-0.0461833	0.793927	0.999994	0.26789	0.0134592	0.914584
ENSMUSG00000062519	Zfp398	zinc finger protein 398	0.0478144	0.682468	0.999996	0.416218	0.000427039	0.057288	-0.187313	0.270919	0.999994	0.181091	0.114582	0.999996
ENSMUSG00000062627	Mysm1	myb-like, SWIRM and MPN domains 1	-0.14944	0.116087	0.999996	-0.110531	0.240137	0.999999	-0.115465	0.432986	0.999994	-0.0765564	0.47581	0.999996
ENSMUSG00000062743	Zfp677	zinc finger protein 677	0.109283	0.534938	0.999996	0.177632	0.289191	0.897149	-0.0943321	0.751401	0.999994	-0.0259835	0.902906	0.999996
ENSMUSG00000062761	Zfp512	zinc finger protein 512	0.049601	0.469119	0.999996	0.0310404	0.654267	0.999999	0.0584033	0.587013	0.999994	0.0398427	0.604695	0.999996
ENSMUSG00000062794	Zfp599	zinc finger protein 599	0.0143298	0.943719	0.999996	0.144609	0.405997	0.991173	-0.0364767	0.914017	0.999994	0.0938022	0.645857	0.999996
ENSMUSG00000062861	Zfp28	zinc finger protein 28	0.27199	0.146752	0.655888	0.542312	0.00363791	0.0440209	0.159067	0.604278	0.999994	0.429388	0.0282537	0.370547
ENSMUSG00000062931	Zfp938	zinc finger protein 938	0.408197	0.00195153	0.131651	0.0719497	0.562493	0.999999	0.16301	0.394646	0.999994	-0.173237	0.178876	0.999996
ENSMUSG00000062944	9130023H24Rik	RIKEN cDNA 9130023H24 gene	0.154587	0.387862	0.999996	0.109151	0.543158	0.999999	-0.0336396	0.922779	0.999994	-0.0790756	0.70286	0.999996
ENSMUSG00000063047	Zfp780b	zinc finger protein 780B	-0.0464747	0.764479	0.999996	-0.137022	0.33103	0.999999	0.00825393	0.974208	0.999994	-0.082293	0.621283	0.999996
ENSMUSG00000063108	Zfp26	zinc finger protein 26	0.0169933	0.910698	0.999996	0.0702821	0.60602	0.999999	-0.0705486	0.758354	0.999994	-0.0172598	0.918563	0.999996
ENSMUSG00000063245	Zfp993	zinc finger protein 993	0.232087	0.243117	0.791114	0.0170827	0.939608	0.999999	0.0525474	0.888332	0.999994	-0.162457	0.458434	0.999996
ENSMUSG00000063281	Zfp35	zinc finger protein 35	0.341256	0.000281033	0.19845	0.0412553	0.625353	0.999999	0.183116	0.159788	0.999994	-0.116885	0.179482	0.999996
ENSMUSG00000063383	Zfp947	zinc finger protein 947	0.230652	0.294583	0.806386	0.0645301	0.781115	0.999999	0.179522	0.614021	0.999994	0.0134	0.961034	0.999996
ENSMUSG00000063488	Zkscan7	zinc finger with KRAB and SCAN domains 7	0.148775	0.388156	0.999996	0.134115	0.43572	0.999999	-0.153183	0.581379	0.999994	-0.167843	0.365921	0.999996
ENSMUSG00000063632	Sox11	SRY (sex determining region Y)-box 11	-0.162614	0.0974288	0.999996	-0.179326	0.0635052	0.999999	-0.0809233	0.610521	0.999994	-0.0976349	0.37011	0.999996
ENSMUSG00000063659	Zbtb18	zinc finger and BTB domain containing 18	-0.0941687	0.472539	0.999996	-0.116197	0.359494	0.999999	-0.0435458	0.854947	0.999994	-0.0655745	0.661515	0.999996
ENSMUSG00000063889	Crem	cAMP responsive element modulator	-0.0200303	0.89176	0.999996	-0.346547	0.00882911	0.257328	0.0100465	0.967289	0.999994	-0.316471	0.0270996	0.680605
ENSMUSG00000063894	Zkscan8	zinc finger with KRAB and SCAN domains 8	-0.198773	0.068156	0.97549	0.0117953	0.92443	0.999999	-0.212108	0.206575	0.999994	-0.0015404	0.992121	0.999996
ENSMUSG00000063972	Nr6a1	nuclear receptor subfamily 6, group A, member 1	0.102772	0.358403	0.999996	0.110292	0.314014	0.999999	-0.0806814	0.664043	0.999994	-0.0731611	0.560742	0.999996
ENSMUSG00000064043	Trerf1	transcriptional regulating factor 1	-0.238835	0.0146475	0.803239	-0.0179326	0.867154	0.999999	-0.228613	0.136201	0.999994	-0.00770996	0.95039	0.999996
ENSMUSG00000064141	Zfp69	zinc finger protein 69	-0.115702	0.723805	0.999996	-0.0276712	0.932632	0.999999	0.302457	0.517658	0.999994	0.390488	0.222211	0.795864
ENSMUSG00000065999	Zfp985	zinc finger protein 985	0.393987	0.129012	0.447527	0.255208	0.309616	0.710737	0.196391	0.653528	0.999994	0.0576118	0.853334	0.999996
ENSMUSG00000066000	Zfp979	zinc finger protein 979	0.300746	0.0697676	0.541543	0.176285	0.279439	0.905453	0.0395653	0.901078	0.999994	-0.084896	0.657112	0.999996
ENSMUSG00000066551	Hmgb1	high mobility group box 1	0.0571899	0.653848	0.999996	-0.399088	0.00162029	0.103634	0.222402	0.228591	0.999994	-0.233875	0.0703576	0.999996
ENSMUSG00000066613	Zfp932	zinc finger protein 932	0.171784	0.174635	0.999996	-0.0715691	0.583356	0.999999	0.0651061	0.767696	0.999994	-0.178247	0.190105	0.999996
ENSMUSG00000022885	St6gal1	beta galactoside alpha 2,6 sialyltransferase 1	-0.816291	1.8314e-08	8.95436e-07	-0.607899	3.34477e-07	7.50292e-05	0.0437181	0.768612	0.999994	0.25211	0.0113021	0.999996
ENSMUSG00000066798	Zbtb6	zinc finger and BTB domain containing 6	-0.0474689	0.663863	0.999996	0.0964412	0.337275	0.999999	-0.0304997	0.874841	0.999994	0.11341	0.305168	0.999996
ENSMUSG00000066829	Zfp810	zinc finger protein 810	0.0777181	0.477391	0.999996	0.0056761	0.962778	0.999999	-0.0500041	0.79105	0.999994	-0.122046	0.289865	0.999996
ENSMUSG00000066838	Zfp772	zinc finger protein 772	0.0143981	0.914622	0.999996	-0.0834312	0.475996	0.999999	0.081067	0.677523	0.999994	-0.0167623	0.910242	0.999996
ENSMUSG00000066880	Zfp617	zinc finger protein 617	0.0923363	0.357839	0.999996	-0.170929	0.076553	0.999999	0.172771	0.255807	0.999994	-0.0904947	0.408746	0.999996
ENSMUSG00000067071	Hes6	hairy and enhancer of split 6	0.0831247	0.492097	0.999996	0.041906	0.734962	0.999999	0.131211	0.47355	0.999994	0.0899922	0.490061	0.999996
ENSMUSG00000067424	Zfp563	zinc finger protein 563	-0.00284803	0.983975	0.999996	-0.0652052	0.610424	0.999999	0.151722	0.43146	0.999994	0.0893648	0.528807	0.999996
ENSMUSG00000067430	Zfp763	zinc finger protein 763	0.105792	0.451809	0.999996	0.269227	0.0429521	0.564842	-0.0143631	0.958552	0.999994	0.149072	0.308468	0.999996
ENSMUSG00000067916	Zfp991	zinc finger protein 991	-0.0788826	0.554336	0.999996	0.0432948	0.751332	0.999999	-0.0677905	0.759046	0.999994	0.054387	0.723	0.999996
ENSMUSG00000067928	Zfp760	zinc finger protein 760	0.325958	0.0217009	0.413862	0.51104	0.000601705	0.0234464	-0.0201731	0.944812	0.999994	0.164909	0.261437	0.999996
ENSMUSG00000067931	Zfp948	zinc finger protein 948	-0.212721	0.0513569	0.915795	-0.503058	6.81093e-05	0.00887918	-0.0297322	0.882583	0.999994	-0.320069	0.00968355	0.608878
ENSMUSG00000067942	Zfp160	zinc finger protein 160	0.12308	0.199111	0.999996	-0.0280635	0.788328	0.999999	-0.00294449	0.987059	0.999994	-0.154087	0.134574	0.999996
ENSMUSG00000068130	Zfp442	zinc finger protein 442	-0.205295	0.274592	0.870125	0.0686704	0.72945	0.999999	-0.1462	0.633316	0.999994	0.127766	0.549495	0.999996
ENSMUSG00000068134	Zfp120	zinc finger protein 120	0.254136	0.0288187	0.708774	0.149699	0.179951	0.999999	0.0610163	0.760872	0.999994	-0.0434211	0.750575	0.999996
ENSMUSG00000068284	Usf3	upstream transcription factor family member 3	-0.239559	0.0370735	0.778723	-0.0113854	0.929974	0.999999	-0.27139	0.137963	0.999994	-0.0432174	0.753726	0.999996
ENSMUSG00000068551	Zfp467	zinc finger protein 467	-0.345953	0.00267124	0.265205	-0.215227	0.0421417	0.841998	-0.127575	0.438803	0.999994	0.00315074	0.982099	0.999996
ENSMUSG00000068823	Csde1	cold shock domain containing E1, RNA binding	0.115366	0.281295	0.999996	-0.00403602	0.974016	0.999999	-0.0184479	0.930753	0.999994	-0.13785	0.23249	0.999996
ENSMUSG00000068959	Zfp619	zinc finger protein 619	-0.230132	0.46749	0.908245	-0.316591	0.281162	0.624538	0.257321	0.592568	0.999994	0.170862	0.635955	0.999996
ENSMUSG00000068966	Zbtb34	zinc finger and BTB domain containing 34	-0.245244	0.0513987	0.744024	0.0451868	0.740904	0.999999	-0.369587	0.0858969	0.999994	-0.0791565	0.588697	0.999996
ENSMUSG00000069184	Zfp72	zinc finger protein 72	0.759573	0.00812143	0.0514393	0.680169	0.0127629	0.0584036	0.081784	0.88014	0.999994	0.00238015	0.994908	0.999996
ENSMUSG00000069206	Zfp874a	zinc finger protein 874a	0.44345	0.0092615	0.157861	0.301466	0.0617969	0.462065	0.0196025	0.953537	0.999994	-0.122382	0.497924	0.999996
ENSMUSG00000069208	Zfp825	zinc finger protein 825	0.178252	0.237236	0.975333	-0.401644	0.0088907	0.160983	0.167548	0.477697	0.999994	-0.412348	0.0139937	0.337321
ENSMUSG00000069727	Zfp975	zinc finger protein 975	0.358332	0.063536	0.405102	-0.0057154	0.979541	0.999999	0.194828	0.529378	0.999994	-0.16922	0.42109	0.999996
ENSMUSG00000069729	Arid1b	AT rich interactive domain 1B (SWI-like)	-0.578853	0.000239354	0.0100655	-0.359856	0.00836662	0.223714	-0.20523	0.317803	0.999994	0.0137658	0.936152	0.999996
ENSMUSG00000069743	Zfp820	zinc finger protein 820	0.376817	0.0170607	0.281804	0.417887	0.00725175	0.133954	-0.00709913	0.980661	0.999994	0.0339702	0.855678	0.999996
ENSMUSG00000070031	Sp140	Sp140 nuclear body protein	0.25254	0.103293	0.710092	0.223138	0.138379	0.750918	0.0411019	0.888549	0.999994	0.0116999	0.952413	0.999996
ENSMUSG00000035451	Foxa1	forkhead box A1	-1.02854	1.87943e-05	0.000269169	-1.10329	6.67739e-06	6.83149e-05	-0.301406	0.286637	0.999994	-0.376157	0.0926868	0.617833
ENSMUSG00000070420	Zscan25	zinc finger and SCAN domain containing 25	0.0587537	0.594936	0.999996	0.415411	0.000249586	0.0484856	0.0423232	0.827455	0.999994	0.398981	0.00112408	0.192524
ENSMUSG00000070605	Zfp992	zinc finger protein 992	0.0885963	0.387813	0.999996	-0.0446918	0.673332	0.999999	0.0120984	0.952829	0.999994	-0.12119	0.267527	0.999996
ENSMUSG00000070643	Sox13	SRY (sex determining region Y)-box 13	-0.273879	0.0086687	0.597765	-0.0532329	0.604515	0.999999	-0.015202	0.939298	0.999994	0.205444	0.0577624	0.999996
ENSMUSG00000070709	Zfp974	zinc finger protein 974	-0.00344664	0.977823	0.999996	0.0696211	0.543088	0.999999	-0.131928	0.450517	0.999994	-0.0588602	0.65326	0.999996
ENSMUSG00000041477	Dcp1b	decapping mRNA 1B	0.566736	0.000705654	0.0223247	0.773632	1.71612e-05	0.000370936	-0.109397	0.676918	0.999994	0.0974998	0.55257	0.999996
ENSMUSG00000071064	Zfp827	zinc finger protein 827	-0.0417957	0.679919	0.999996	0.192095	0.0392183	0.984071	-0.197874	0.178245	0.999994	0.0360172	0.750774	0.999996
ENSMUSG00000071076	Jund	jun D proto-oncogene	-0.320558	0.00563945	0.377501	-0.394711	0.000865174	0.0919267	-0.0891016	0.61815	0.999994	-0.163255	0.168972	0.999996
ENSMUSG00000071256	Zfp213	zinc finger protein 213	0.166469	0.302133	0.999293	0.400463	0.0110675	0.172398	0.0449154	0.882084	0.999994	0.27891	0.0960648	0.890882
ENSMUSG00000071266	Zfp946	zinc finger protein 946	0.108878	0.352824	0.999996	-0.27045	0.0188619	0.552522	0.142982	0.420537	0.999994	-0.236345	0.0586516	0.999996
ENSMUSG00000071267	Zfp942	zinc finger protein 942	0.246875	0.0404612	0.739954	-0.0480765	0.704277	0.999999	0.0965213	0.624901	0.999994	-0.19843	0.119661	0.999996
ENSMUSG00000071281	Zfp65	zinc finger protein 65	0.15589	0.243116	0.999996	-0.0563799	0.685799	0.999999	0.120982	0.571025	0.999994	-0.0912887	0.544586	0.999996
ENSMUSG00000071291	Zfp58	zinc finger protein 58	0.0989499	0.509161	0.999996	-0.0523951	0.733759	0.999999	0.0743921	0.767485	0.999994	-0.0769529	0.649341	0.999996
ENSMUSG00000071350	Setdb2	SET domain, bifurcated 2	0.17723	0.133486	0.999996	0.229935	0.0423937	0.757184	0.172536	0.346899	0.999994	0.225241	0.0693426	0.999996
ENSMUSG00000071477	Zfp777	zinc finger protein 777	0.0238721	0.846499	0.999996	0.396402	0.000710463	0.086474	0.0392581	0.848905	0.999994	0.411788	0.00142705	0.181207
ENSMUSG00000071646	Mta2	metastasis-associated gene family, member 2	-0.0880504	0.141486	0.999996	0.0925788	0.11438	0.999999	-0.0364369	0.721499	0.999994	0.144192	0.027663	0.999996
ENSMUSG00000071661	Zbtb3	zinc finger and BTB domain containing 3	-0.30346	0.0606259	0.526657	-0.0411635	0.810758	0.999999	0.0389724	0.894753	0.999994	0.301269	0.0810855	0.802435
ENSMUSG00000071757	Zhx2	zinc fingers and homeoboxes 2	0.21844	0.0339686	0.902647	0.528896	1.41974e-05	0.00270943	-0.0665507	0.70326	0.999994	0.243906	0.0249587	0.999996
ENSMUSG00000072623	Zfp9	zinc finger protein 9	0.474077	0.129948	0.404078	0.149804	0.625744	0.999999	0.54971	0.252988	0.999994	0.225437	0.502564	0.999996
ENSMUSG00000072762	4930522L14Rik	RIKEN cDNA 4930522L14 gene	-0.0289981	0.826814	0.999996	-0.210292	0.0696356	0.843091	0.133415	0.470926	0.999994	-0.0478786	0.739154	0.999996
ENSMUSG00000072763	5430403G16Rik	RIKEN cDNA 5430403G16 gene	0.316806	0.0085426	0.405489	0.158051	0.162789	0.999999	0.0285338	0.897101	0.999994	-0.130221	0.2942	0.999996
ENSMUSG00000072774	Zfp951	zinc finger protein 951	-0.134063	0.402667	0.999996	-0.171254	0.270115	0.927483	-0.05541	0.849015	0.999994	-0.0926009	0.616513	0.999996
ENSMUSG00000072889	Nfxl1	nuclear transcription factor, X-box binding-like 1	0.164957	0.00956144	0.999996	0.219013	0.000810341	0.971013	0.120458	0.20452	0.999994	0.174513	0.0101899	0.999996
ENSMUSG00000031066	Usp11	ubiquitin specific peptidase 11	0.756553	0.000521361	0.00706269	0.963419	2.38531e-05	0.000260776	-0.0419054	0.914601	0.999994	0.164961	0.414198	0.999996
ENSMUSG00000073062	Zxdb	zinc finger, X-linked, duplicated B	-0.0257123	0.871812	0.999996	0.336822	0.0171546	0.310689	-0.156567	0.486386	0.999994	0.205967	0.172832	0.999996
ENSMUSG00000073176	Zfp449	zinc finger protein 449	0.232884	0.359858	0.833203	0.0917119	0.732857	0.999999	0.0216698	0.965105	0.999994	-0.119502	0.682897	0.999996
ENSMUSG00000073197	5730507C01Rik	RIKEN cDNA 5730507C01 gene	-0.121633	0.779091	0.999996	-0.843971	0.0373586	0.111728	0.101724	0.888289	0.999994	-0.620614	0.169249	0.619558
ENSMUSG00000074158	Zfp976	zinc finger protein 976	0.0228625	0.914453	0.999996	0.0835724	0.671659	0.999999	-0.162355	0.592508	0.999994	-0.101645	0.64028	0.999996
ENSMUSG00000074165	Zfp788	zinc finger protein 788	0.141963	0.358925	0.999996	0.101938	0.508868	0.999999	-0.0154798	0.959703	0.999994	-0.0555043	0.760646	0.999996
ENSMUSG00000074166	AW146154	expressed sequence AW146154	0.343164	0.0324361	0.388427	-0.0267631	0.879164	0.999999	0.180667	0.470339	0.999994	-0.189259	0.265061	0.999996
ENSMUSG00000074194	Zfp791	zinc finger protein 791	-0.151701	0.432342	0.999996	-0.0478767	0.812184	0.999999	0.0826982	0.803403	0.999994	0.186523	0.36591	0.999996
ENSMUSG00000074220	Zfp382	zinc finger protein 382	-0.152471	0.485082	0.999996	-0.252114	0.220533	0.66885	0.0563323	0.885661	0.999994	-0.0433107	0.870489	0.999996
ENSMUSG00000074221	Zfp568	zinc finger protein 568	-0.0097579	0.943463	0.999996	-0.218878	0.0637148	0.801323	-0.0903	0.647212	0.999994	-0.29942	0.0226236	0.751273
ENSMUSG00000074282	Zfp94	zinc finger protein 94	0.192012	0.286158	0.911162	0.481661	0.00805026	0.0903181	-0.179145	0.539652	0.999994	0.110505	0.584401	0.999996
ENSMUSG00000074283	Zfp109	zinc finger protein 109	0.148519	0.636509	0.999996	0.146615	0.634615	0.999999	-0.0540423	0.928046	0.999994	-0.0559464	0.878913	0.999996
ENSMUSG00000074405	Zfp865	zinc finger protein 865	-0.19555	0.102207	0.963477	0.317553	0.00909008	0.342038	-0.345304	0.0894409	0.999994	0.167799	0.192651	0.999996
ENSMUSG00000074406	Zfp628	zinc finger protein 628	0.122395	0.348437	0.999996	0.514473	0.000263371	0.0152868	-0.112711	0.592592	0.999994	0.279367	0.040339	0.870333
ENSMUSG00000074500	Zfp558	zinc finger protein 558	0.684905	0.0606126	0.224562	0.49565	0.160857	0.392956	0.124733	0.861837	0.999994	-0.0645216	0.883106	0.999996
ENSMUSG00000074519	Zfp971	zinc finger protein 971	-0.118112	0.481789	0.999996	-0.377429	0.0207264	0.236792	0.0151012	0.961952	0.999994	-0.244216	0.169987	0.999996
ENSMUSG00000074622	Mafb	v-maf musculoaponeurotic fibrosarcoma oncogene family, protein B (avian)	-0.573998	0.00368383	0.052224	-0.738504	0.000308889	0.00370651	0.0557913	0.869547	0.999994	-0.108715	0.631456	0.999996
ENSMUSG00000074735	Gm21994	predicted gene 21994	-0.130533	0.500803	0.999996	0.21357	0.238735	0.77624	-0.071537	0.836021	0.999994	0.272566	0.171177	0.940761
ENSMUSG00000074824	Rslcan18	regulator of sex-limitation candidate 18	0.0545489	0.908372	0.999996	-1.12446	0.0114197	0.0358595	0.186345	0.798222	0.999994	-0.992659	0.040339	0.201862
ENSMUSG00000074829	2010315B03Rik	RIKEN cDNA 2010315B03 gene	0.21483	0.149669	0.849848	-0.050867	0.751328	0.999999	0.0855861	0.742853	0.999994	-0.180111	0.26449	0.999996
ENSMUSG00000074862	BC025920	cDNA sequence BC025920	0.33142	0.0141736	0.378699	0.205427	0.108363	0.841998	0.058258	0.80867	0.999994	-0.0677355	0.654564	0.999996
ENSMUSG00000074865	Zfp934	zinc finger protein 934	-0.065924	0.652663	0.999996	-0.437989	0.00222269	0.0780243	0.143764	0.503114	0.999994	-0.228301	0.125546	0.999996
ENSMUSG00000074867	Zfp808	zinc finger protein 808	0.117142	0.559929	0.999996	-0.129741	0.499624	0.999999	0.171917	0.576657	0.999994	-0.0749656	0.744566	0.999996
ENSMUSG00000075040	Zfp408	zinc finger protein 408	0.0596196	0.518716	0.999996	0.237512	0.0081669	0.757115	-0.067499	0.650116	0.999994	0.110394	0.248775	0.999996
ENSMUSG00000075327	Zbtb2	zinc finger and BTB domain containing 2	-0.0525005	0.678633	0.999996	0.174456	0.123667	0.991528	0.0408615	0.851767	0.999994	0.267818	0.0341478	0.920193
ENSMUSG00000075394	Hoxc4	homeobox C4	0.282636	0.391637	0.808946	0.43799	0.164795	0.412831	-0.0895351	0.886621	0.999994	0.0658185	0.86603	0.999996
ENSMUSG00000075588	Hoxb2	homeobox B2	0.268865	0.00200603	0.617989	0.232982	0.00437183	0.80578	0.127726	0.309152	0.999994	0.0918431	0.286712	0.999996
ENSMUSG00000075595	Zfp652	zinc finger protein 652	-0.216874	0.0404425	0.904524	-0.0550389	0.612765	0.999999	-0.153375	0.344649	0.999994	0.00845973	0.950383	0.999996
ENSMUSG00000076431	Sox4	SRY (sex determining region Y)-box 4	-0.345636	0.00399548	0.281731	-0.154449	0.1609	0.999999	-0.0971184	0.592409	0.999994	0.0940682	0.455849	0.999996
ENSMUSG00000078302	Foxd1	forkhead box D1	-0.881789	0.000115672	0.00154549	-0.207068	0.260776	0.798125	-0.162865	0.582887	0.999994	0.511857	0.0180159	0.221668
ENSMUSG00000078435	AU041133	expressed sequence AU041133	0.124468	0.26057	0.999996	-0.0462293	0.689442	0.999999	0.076037	0.680144	0.999994	-0.0946602	0.436571	0.999996
ENSMUSG00000078495	Zfp984	zinc finger protein 984	0.4246	8.8884e-05	0.0388916	0.27086	0.00349786	0.539511	0.166109	0.239804	0.999994	0.0123683	0.913102	0.999996
ENSMUSG00000078502	Gm13212	predicted gene 13212	0.207281	0.218856	0.869068	0.27459	0.0948711	0.561465	-0.031578	0.924126	0.999994	0.0357307	0.861995	0.999996
ENSMUSG00000025007	Aldh18a1	aldehyde dehydrogenase 18 family, member A1	0.747851	1.08218e-08	9.31555e-07	0.950117	1.16685e-10	3.63823e-09	0.0464461	0.72976	0.999994	0.248712	0.00477637	0.999996
ENSMUSG00000078546	Zfp995	zinc finger protein 995	0.458138	0.0174042	0.178815	0.253611	0.163412	0.648477	0.0941672	0.775819	0.999994	-0.11036	0.601467	0.999996
ENSMUSG00000078580	E430018J23Rik	RIKEN cDNA E430018J23 gene	0.0156344	0.936102	0.999996	0.123311	0.472303	0.999999	-0.0803787	0.79105	0.999994	0.0272978	0.898856	0.999996
ENSMUSG00000078768	Zfp566	zinc finger protein 566	0.593647	0.000608719	0.0169246	0.298503	0.046365	0.458598	0.217365	0.374829	0.999994	-0.0777793	0.656887	0.999996
ENSMUSG00000078779	Zfp59	zinc finger protein 59	-0.0839132	0.574208	0.999996	-0.100242	0.474919	0.999999	0.15421	0.483901	0.999994	0.137882	0.375875	0.999996
ENSMUSG00000078861	Zfp931	zinc finger protein 931	0.183174	0.31576	0.935635	-0.161587	0.378835	0.93671	-0.0209419	0.95382	0.999994	-0.365703	0.0626892	0.588723
ENSMUSG00000078862	Gm14326	predicted gene 14326	0.171195	0.173888	0.999996	-0.0755365	0.559411	0.999999	0.0564632	0.803806	0.999994	-0.190268	0.159354	0.999996
ENSMUSG00000078864	Gm14322	predicted gene 14322	0.480392	0.180422	0.488344	-0.814298	0.028669	0.0944966	0.264521	0.662838	0.999994	-1.03017	0.0124517	0.085161
ENSMUSG00000078866	Zfp970	zinc finger protein 970	0.116154	0.40478	0.999996	-0.0497739	0.734855	0.999999	-0.00578607	0.982224	0.999994	-0.171714	0.245768	0.999996
ENSMUSG00000078867	Gm14418	predicted gene 14418	0.0415134	0.88027	0.999996	0.0195216	0.944528	0.999999	-0.089344	0.844346	0.999994	-0.111336	0.700143	0.999996
ENSMUSG00000078877	Gm14295	predicted gene 14295	1.28553	0.0407066	0.127647	0.244736	0.710329	0.999999	0.414778	0.71593	0.999994	-0.626013	0.318159	0.882962
ENSMUSG00000078886	Gm2026	predicted gene 2026	0.167598	0.8604	0.999996	-0.311344	0.740278	0.999999	0.0129006	0.994412	0.999994	-0.466041	0.648469	0.999996
ENSMUSG00000078887	Gm6710	predicted gene 6710	0.283273	0.610122	0.999996	-0.887993	0.0832714	0.199599	0.624826	0.432018	0.999994	-0.54644	0.352687	0.942513
ENSMUSG00000078899	Gm4631	predicted gene 4631	0.218981	0.0248824	0.912418	0.0531207	0.592165	0.999999	0.0116247	0.952829	0.999994	-0.154236	0.133232	0.999996
ENSMUSG00000078903	Gm14391	predicted gene 14391	-0.0171159	0.890724	0.999996	0.202437	0.0617389	0.895086	-0.249923	0.155776	0.999994	-0.0303696	0.822375	0.999996
ENSMUSG00000078994	Zfp429	zinc finger protein 429	-0.179465	0.34791	0.944435	0.0244596	0.907151	0.999999	0.0498604	0.886573	0.999994	0.253785	0.208363	0.999996
ENSMUSG00000078995	Zfp456	zinc finger protein 456	-0.139902	0.383575	0.999996	-0.350597	0.0282501	0.303331	-0.131324	0.607444	0.999994	-0.342018	0.049869	0.629969
ENSMUSG00000079215	Zfp664	zinc finger protein 664	-0.157838	0.0408748	0.999996	0.00447402	0.959514	0.999999	-0.0339059	0.80469	0.999994	0.128406	0.118544	0.999996
ENSMUSG00000079509	Zfx	zinc finger protein X-linked	-0.0510066	0.655477	0.999996	-0.0906479	0.397171	0.999999	-0.0332917	0.869635	0.999994	-0.0729329	0.552162	0.999996
ENSMUSG00000079560	Hoxa3	homeobox A3	-0.129322	0.299648	0.999996	-0.0621482	0.636719	0.999999	-0.262364	0.175995	0.999994	-0.195191	0.148582	0.999996
ENSMUSG00000087598	Zfp111	zinc finger protein 111	-0.351552	0.0293781	0.365178	-0.00813081	0.964106	0.999999	-0.219244	0.368629	0.999994	0.124177	0.491625	0.999996
ENSMUSG00000089756	Zfp966	zinc finger protein 966	0.345949	0.380534	0.779692	0.464543	0.236028	0.515052	-0.278088	0.684296	0.999994	-0.159495	0.725564	0.999996
ENSMUSG00000090015	Gm15446	predicted gene 15446	0.479116	0.00116946	0.057024	0.118316	0.371223	0.999999	0.230839	0.27213	0.999994	-0.129961	0.369044	0.999996
ENSMUSG00000090641	Zfp712	zinc finger protein 712	0.168815	0.524487	0.999996	0.437128	0.0666979	0.25868	0.208803	0.614076	0.999994	0.477115	0.0696269	0.43125
ENSMUSG00000090659	Zfp493	zinc finger protein 493	-0.109507	0.717066	0.999996	-0.105222	0.719856	0.999999	0.049555	0.928335	0.999994	0.0538402	0.877607	0.999996
ENSMUSG00000090963	Gm17655	predicted gene, 17655	0.280271	0.0386976	0.588967	-0.0463945	0.749305	0.999999	0.0601224	0.805596	0.999994	-0.266543	0.0639539	0.93447
ENSMUSG00000091183	Gm5141	predicted gene 5141	0.0918334	0.580419	0.999996	-0.232796	0.130755	0.714665	0.151733	0.547171	0.999994	-0.172896	0.317055	0.999996
ENSMUSG00000091474	2610021A01Rik	RIKEN cDNA 2610021A01 gene	0.0336391	0.779087	0.999996	0.0786053	0.472108	0.999999	-0.00391818	0.985141	0.999994	0.0410481	0.75333	0.999996
ENSMUSG00000091736	Yy2	Yy2 transcription factor	-0.12303	0.880697	0.999996	-0.123364	0.871609	0.999999	0.42194	0.724613	0.999994	0.421606	0.609948	0.999996
ENSMUSG00000091764	Zfp964	zinc finger protein 964	0.185132	0.260238	0.937892	0.328615	0.0370877	0.36635	0.0783547	0.787846	0.999994	0.221838	0.194642	0.999996
ENSMUSG00000092260	Zfp963	zinc finger protein 963	0.138141	0.447177	0.999996	0.23859	0.142708	0.689697	0.394849	0.153475	0.999994	0.495298	0.00895322	0.182829
ENSMUSG00000092416	Zfp141	zinc finger protein 141	0.053995	0.782975	0.999996	0.0379491	0.847808	0.999999	0.0278842	0.9382	0.999994	0.0118383	0.958892	0.999996
ENSMUSG00000094410	Gm38394	predicted gene, 38394	-0.235925	0.0664121	0.784315	-0.368003	0.00552087	0.190019	-0.0880617	0.67886	0.999994	-0.22014	0.113834	0.999996
ENSMUSG00000094441	Zfp955a	zinc finger protein 955A	0.165095	0.132755	0.999996	0.115087	0.280349	0.999999	0.163742	0.336157	0.999994	0.113734	0.336886	0.999996
ENSMUSG00000094870	Zfp131	zinc finger protein 131	0.300639	7.70134e-05	0.344451	0.442392	3.00229e-07	0.0015062	0.0875364	0.375194	0.999994	0.229289	0.00181188	0.999996
ENSMUSG00000095193	Gm20939	predicted gene, 20939	0.461155	0.00159827	0.0748694	0.313907	0.018159	0.378186	0.100757	0.656412	0.999994	-0.0464912	0.768673	0.999996
ENSMUSG00000095253	Zfp799	zinc finger protein 799	-0.208982	0.146006	0.876338	-0.189471	0.179529	0.882618	-0.079529	0.748307	0.999994	-0.0600175	0.732124	0.999996
ENSMUSG00000095325	Zfp870	zinc finger protein 870	0.0681768	0.663274	0.999996	0.21938	0.116615	0.772072	0.0670698	0.796344	0.999994	0.218273	0.156793	0.999996
ENSMUSG00000041688	Amot	angiomotin	-0.878506	2.30183e-06	5.33402e-05	-0.677099	3.01554e-05	0.000948743	-0.364853	0.0955994	0.999994	-0.163447	0.275362	0.999996
ENSMUSG00000095362	Gm14325	predicted gene 14325	0.227903	0.153465	0.795961	0.214329	0.171821	0.779947	-0.0472957	0.877108	0.999994	-0.0608697	0.749497	0.999996
ENSMUSG00000095432	Zfp748	zinc finger protein 748	-0.127356	0.292509	0.999996	-0.0919558	0.439575	0.999999	0.0596196	0.773594	0.999994	0.0950197	0.479812	0.999996
ENSMUSG00000095936	Zscan4e	zinc finger and SCAN domain containing 4E	-1.35598	0.0337018	0.108434	-2.32222	0.002215	0.00574387	-0.160383	0.878525	0.999994	-1.12662	0.200049	0.61941
ENSMUSG00000095990	Zfp97	zinc finger protein 97	0.358571	0.0205968	0.328778	0.0476574	0.766264	0.999999	0.274914	0.239804	0.999994	-0.0360001	0.844296	0.999996
ENSMUSG00000096433	Zfp994	zinc finger protein 994	0.32281	0.0133422	0.402874	0.20353	0.0978727	0.861194	0.0958234	0.652058	0.999994	-0.0234572	0.88079	0.999996
ENSMUSG00000096696	Zfp960	zinc finger protein 960	0.476405	0.0151625	0.153803	0.322489	0.0823352	0.42888	0.0128266	0.9715	0.999994	-0.14109	0.495843	0.999996
ENSMUSG00000096795	Zfp433	zinc finger protein 433	0.0950165	0.686555	0.999996	-0.568373	0.010781	0.0687734	0.279199	0.405629	0.999994	-0.384191	0.108971	0.629107
ENSMUSG00000096856	Gm10778	predicted gene 10778	0.14823	0.259191	0.999996	-0.175331	0.163719	0.958701	0.254983	0.204455	0.999994	-0.0685784	0.652764	0.999996
ENSMUSG00000096910	Zfp955b	zinc finger protein 955B	0.116569	0.312606	0.999996	0.018387	0.884483	0.999999	0.0927068	0.621655	0.999994	-0.00547485	0.970231	0.999996
ENSMUSG00000096916	Zfp850	zinc finger protein 850	-0.0766636	0.542394	0.999996	-0.124399	0.293504	0.999999	0.0377216	0.868347	0.999994	-0.0100135	0.949133	0.999996
ENSMUSG00000097333	Zfp87	zinc finger protein 87	-0.235084	0.103758	0.77579	-0.162513	0.247836	0.972931	0.0173212	0.952829	0.999994	0.0898916	0.593064	0.999996
ENSMUSG00000098022	Zfp82	zinc finger protein 82	0.0684483	0.765988	0.999996	0.291203	0.146519	0.542978	0.0836441	0.829867	0.999994	0.306399	0.16569	0.853085
ENSMUSG00000098905	Zfp953	zinc finger protein 953	0.185773	0.317944	0.928018	0.0607614	0.7531	0.999999	0.224197	0.429586	0.999994	0.0991858	0.639006	0.999996
ENSMUSG00000099032	Tcf24	transcription factor 24	-0.329223	0.000108643	0.209818	-0.307748	0.000138171	0.263457	-0.0401278	0.744876	0.999994	-0.0186535	0.835415	0.999996
ENSMUSG00000020681	Ace	angiotensin I converting enzyme (peptidyl-dipeptidase A) 1	-1.42981	0.000663093	0.00359687	-0.54929	0.136002	0.343165	-0.630583	0.242954	0.999994	0.249937	0.593599	0.999996
ENSMUSG00000027078	Ube2l6	ubiquitin-conjugating enzyme E2L 6	0.540605	1.84454e-06	0.000841379	0.741534	8.09997e-09	7.27396e-07	0.0627995	0.654815	0.999994	0.263728	0.00404844	0.944261
ENSMUSG00000053414	Hunk	hormonally upregulated Neu-associated kinase	-0.842695	3.16725e-06	8.28393e-05	-0.643246	3.81599e-05	0.00146028	-0.123949	0.544926	0.999994	0.0754998	0.63343	0.999996
ENSMUSG00000055148	Klf2	Kruppel-like factor 2 (lung)	-0.680799	0.000736126	0.0118399	-1.09168	4.82786e-06	5.33254e-05	-0.251446	0.356033	0.999994	-0.662324	0.00338612	0.0567596
ENSMUSG00000022892	App	amyloid beta (A4) precursor protein	-0.469729	0.000172884	0.0273528	0.000305383	0.998399	0.999999	-0.236514	0.160805	0.999994	0.23352	0.0440447	0.999996
ENSMUSG00000018909	Arrb1	arrestin, beta 1	-0.50851	0.000126038	0.0150264	-0.39569	0.00113573	0.0987959	-0.270515	0.131189	0.999994	-0.157695	0.208185	0.999996
ENSMUSG00000064337	mt-Rnr1	mitochondrially encoded 12S rRNA	0.780927	1.18523e-06	5.04161e-05	0.976342	2.40497e-08	5.18749e-07	-0.00158969	0.994528	0.999994	0.193825	0.116343	0.999996
ENSMUSG00000030983	Bccip	BRCA2 and CDKN1A interacting protein	0.423329	0.000158133	0.0498243	0.0496575	0.615364	0.999999	0.199069	0.182236	0.999994	-0.174603	0.0871279	0.999996
ENSMUSG00000038552	Fndc4	fibronectin type III domain containing 4	0.518652	3.4426e-06	0.00178037	0.714002	1.52281e-08	1.61706e-06	0.123818	0.34853	0.999994	0.319167	0.00100509	0.489213
ENSMUSG00000024621	Csf1r	colony stimulating factor 1 receptor	-0.821162	0.000698774	0.0071339	-0.627453	0.00488546	0.0343722	-0.307008	0.332787	0.999994	-0.1133	0.660496	0.999996
ENSMUSG00000048106	4632415L05Rik	RIKEN cDNA 4632415L05 gene	0.440009	9.3202e-05	0.0315296	0.631585	6.75201e-07	9.84853e-05	-0.192382	0.203087	0.999994	-0.000806717	0.99498	0.999996
ENSMUSG00000024164	C3	complement component 3	-1.28359	0.00013328	0.000845335	-0.0404525	0.879164	0.999999	-0.073465	0.870385	0.999994	1.16967	0.000701141	0.00728537
ENSMUSG00000098132	Rassf10	Ras association (RalGDS/AF-6) domain family (N-terminal) member 10	-0.741115	0.000253923	0.00445843	-0.550598	0.00249373	0.0345726	-0.1335	0.631272	0.999994	0.0570172	0.798361	0.999996
ENSMUSG00000042210	Abhd14a	abhydrolase domain containing 14A	0.724111	2.20041e-06	0.000134552	0.913856	2.94434e-08	7.69618e-07	0.105216	0.57476	0.999994	0.294961	0.012361	0.752151
ENSMUSG00000032875	Arhgef17	Rho guanine nucleotide exchange factor (GEF) 17	-0.641683	4.06115e-06	0.000421813	-0.452579	0.000131772	0.0226502	-0.231093	0.158545	0.999994	-0.0419889	0.74115	0.999996
ENSMUSG00000034994	Eef2	eukaryotic translation elongation factor 2	0.462757	6.8245e-05	0.0195384	0.65118	5.54429e-07	6.62581e-05	0.0148698	0.938789	0.999994	0.203293	0.0510735	0.999996
ENSMUSG00000034620	Rxylt1	ribitol xylosyltransferase 1	0.49125	2.89363e-05	0.00869971	0.678701	2.24126e-07	2.3813e-05	-0.0123548	0.950818	0.999994	0.175096	0.0793135	0.999996
ENSMUSG00000021548	Ccnh	cyclin H	0.532629	1.30897e-05	0.00330113	0.301291	0.00246674	0.366978	0.121573	0.419568	0.999994	-0.109765	0.282684	0.999996
ENSMUSG00000007739	Cct4	chaperonin containing Tcp1, subunit 4 (delta)	0.498595	4.92086e-05	0.0104072	0.168443	0.0880595	0.999999	0.136654	0.381799	0.999994	-0.193497	0.0746794	0.999996
ENSMUSG00000026437	Cdk18	cyclin-dependent kinase 18	-0.709812	3.12542e-07	2.61349e-05	-0.522379	6.58617e-06	0.00188653	-0.0455196	0.778236	0.999994	0.141914	0.164931	0.999996
ENSMUSG00000041144	Dnah7b	dynein, axonemal, heavy chain 7B	0.613826	0.00184384	0.0288056	0.800986	0.0001115	0.00139004	-0.136454	0.669859	0.999994	0.0507064	0.813198	0.999996
ENSMUSG00000035000	Dpp4	dipeptidylpeptidase 4	-0.712064	5.06791e-06	0.000284738	-0.52531	0.000115929	0.00901896	-0.309746	0.105775	0.999994	-0.122991	0.365122	0.999996
ENSMUSG00000000278	Scpep1	serine carboxypeptidase 1	0.528657	2.12358e-08	3.67122e-05	0.712978	9.20911e-11	1.34394e-08	0.105629	0.237287	0.999994	0.28995	0.000129374	0.64059
ENSMUSG00000032232	Cgnl1	cingulin-like 1	-0.663219	2.79887e-08	5.69435e-06	-0.480022	8.55273e-07	0.00118476	-0.10674	0.343558	0.999994	0.0764563	0.352816	0.999996
ENSMUSG00000028811	Yars	tyrosyl-tRNA synthetase	0.477045	8.30869e-07	0.00150461	0.659592	3.26021e-09	7.53474e-07	0.176691	0.118309	0.999994	0.359238	8.23749e-05	0.165095
ENSMUSG00000031278	Acsl4	acyl-CoA synthetase long-chain family member 4	-0.6114	1.63757e-05	0.00155737	-0.429904	0.00043568	0.0481664	-0.126143	0.463139	0.999994	0.0553526	0.680254	0.999996
ENSMUSG00000035504	Reep6	receptor accessory protein 6	1.00919	3.64662e-10	9.05307e-09	1.18983	8.98471e-12	1.08497e-10	-0.00880559	0.958552	0.999994	0.171835	0.0470301	0.999996
ENSMUSG00000043259	Fam13c	family with sequence similarity 13, member C	1.22715	0.00229274	0.0118543	1.40592	0.000421979	0.00172967	0.0484214	0.953772	0.999994	0.227193	0.541856	0.999996
ENSMUSG00000020048	Hsp90b1	heat shock protein 90, beta (Grp94), member 1	-0.638307	7.53489e-08	1.76931e-05	-0.459639	2.45561e-06	0.00318696	-0.0685973	0.574739	0.999994	0.110071	0.180862	0.999996
ENSMUSG00000040093	Bmf	BCL2 modifying factor	-0.932348	1.74899e-05	0.000287347	-0.756286	0.000144488	0.00199911	-0.377043	0.153475	0.999994	-0.200981	0.316983	0.999996
ENSMUSG00000032715	Trib3	tribbles pseudokinase 3	1.09184	3.32912e-09	5.83196e-08	1.26782	1.18044e-10	1.26367e-09	0.217047	0.180255	0.999994	0.393025	0.00124109	0.208551
ENSMUSG00000052563	D930048N14Rik	RIKEN cDNA D930048N14 gene	-0.635101	9.43717e-06	0.000841751	-0.459179	0.000213144	0.0256694	-0.190101	0.255982	0.999994	-0.01418	0.92311	0.999996
ENSMUSG00000057541	Pus7	pseudouridylate synthase 7	0.489122	5.58923e-07	0.000904009	0.663685	2.48574e-09	5.64774e-07	0.190745	0.0955994	0.999994	0.365308	6.26063e-05	0.135267
ENSMUSG00000026991	Pkp4	plakophilin 4	-0.605706	1.84767e-06	0.000349175	-0.43169	5.69074e-05	0.0222107	-0.108482	0.44826	0.999994	0.0655344	0.538192	0.999996
ENSMUSG00000031778	Cx3cl1	chemokine (C-X3-C motif) ligand 1	-0.482614	0.000232236	0.0270412	-0.0249848	0.841816	0.999999	-0.207271	0.228944	0.999994	0.250358	0.0429358	0.999996
ENSMUSG00000041168	Lonp1	lon peptidase 1, mitochondrial	0.538048	9.64823e-08	0.000101952	0.71035	5.80128e-10	8.85761e-08	0.0649286	0.535088	0.999994	0.237231	0.00198295	0.999996
ENSMUSG00000056899	Immp2l	IMP2 inner mitochondrial membrane peptidase-like (S. cerevisiae)	1.28153	3.42532e-06	3.38736e-05	1.45371	3.82006e-07	2.43863e-06	-0.181829	0.627498	0.999994	-0.0096439	0.968947	0.999996
ENSMUSG00000045672	Col27a1	collagen, type XXVII, alpha 1	-0.97255	0.000400352	0.00388326	-0.800887	0.00172796	0.0110343	-0.198174	0.59409	0.999994	-0.0265106	0.935273	0.999996
ENSMUSG00000026730	Pter	phosphotriesterase related	0.794014	7.77422e-06	0.00023623	0.964583	1.54195e-07	2.89004e-06	0.280647	0.198957	0.999994	0.451216	0.00226058	0.147023
ENSMUSG00000037824	Tspan14	tetraspanin 14	-0.66941	1.08218e-08	2.33368e-06	-0.499373	2.34401e-07	0.000348267	-0.0993878	0.349402	0.999994	0.0706492	0.366246	0.999996
ENSMUSG00000040618	Pck2	phosphoenolpyruvate carboxykinase 2 (mitochondrial)	0.64147	6.85175e-08	1.56761e-05	0.811488	7.50606e-10	4.48411e-08	0.0252497	0.861837	0.999994	0.195267	0.0188158	0.999996
ENSMUSG00000006418	Rnf114	ring finger protein 114	0.502446	3.27808e-07	0.000466607	0.672353	1.73581e-09	3.76028e-07	0.083481	0.420143	0.999994	0.253387	0.00131673	0.999996
ENSMUSG00000037003	Tns2	tensin 2	-0.627666	6.84094e-07	0.000129841	-0.458321	1.79745e-05	0.0087986	-0.188482	0.167219	0.999994	-0.0191366	0.866155	0.999996
ENSMUSG00000063785	Utp14a	UTP14A small subunit processome component	0.647612	5.90139e-07	9.23943e-05	0.816672	7.65991e-09	3.75577e-07	0.0661761	0.67132	0.999994	0.235236	0.014897	0.999996
ENSMUSG00000000934	Top1mt	DNA topoisomerase 1, mitochondrial	0.419663	9.67467e-05	0.0435733	0.588135	7.31087e-07	0.000178648	0.0579704	0.709682	0.999994	0.226442	0.0191078	0.999996
ENSMUSG00000030827	Fgf21	fibroblast growth factor 21	0.66422	0.00446015	0.0409398	0.832311	0.000456916	0.00373107	0.0117245	0.977895	0.999994	0.179816	0.438138	0.999996
ENSMUSG00000057315	Arhgap24	Rho GTPase activating protein 24	-0.913969	2.66245e-06	5.77889e-05	-0.748081	1.39899e-05	0.000361986	-0.0543083	0.830287	0.999994	0.11158	0.512414	0.999996
ENSMUSG00000022559	Fbxl6	F-box and leucine-rich repeat protein 6	0.502109	4.43465e-05	0.00943052	0.666007	6.66622e-07	6.63667e-05	-0.0279065	0.88436	0.999994	0.135992	0.200828	0.999996
ENSMUSG00000044986	Tst	thiosulfate sulfurtransferase, mitochondrial	0.60989	0.000334985	0.0106422	0.772083	1.19466e-05	0.000278158	0.103612	0.687714	0.999994	0.265805	0.0790413	0.941077
ENSMUSG00000037868	Egr2	early growth response 2	-1.33657	0.000131116	0.000903207	-1.08985	0.000721998	0.0037956	-0.298406	0.48775	0.999994	-0.0516886	0.90024	0.999996
ENSMUSG00000039952	Dag1	dystroglycan 1	-0.767394	4.6233e-07	2.35154e-05	-0.608141	4.11237e-06	0.00045383	-0.153708	0.336157	0.999994	0.0055447	0.967663	0.999996
ENSMUSG00000036390	Gadd45a	growth arrest and DNA-damage-inducible 45 alpha	0.460301	3.16725e-06	0.00459877	0.280811	0.000417843	0.449127	0.383911	0.00688722	0.999994	0.204421	0.0115229	0.999996
ENSMUSG00000031024	St5	suppression of tumorigenicity 5	-0.630271	1.84767e-06	0.000273866	-0.471018	3.17579e-05	0.00945502	-0.0982594	0.512311	0.999994	0.0609932	0.593599	0.999996
ENSMUSG00000052031	Tagap1	T cell activation GTPase activating protein 1	0.478138	6.8245e-05	0.0158211	0.637138	9.68205e-07	0.000120882	0.258057	0.116186	0.999994	0.417057	0.000565637	0.127503
ENSMUSG00000028217	Cdh17	cadherin 17	-0.697183	3.55607e-06	0.000242481	-0.539876	3.79011e-05	0.00418664	-0.0550713	0.773687	0.999994	0.102237	0.422403	0.999996
ENSMUSG00000075254	Heg1	heart development protein with EGF-like domains 1	-0.530641	0.00123497	0.0377804	-0.287529	0.0482985	0.496999	-0.140974	0.544189	0.999994	0.102138	0.553761	0.999996
ENSMUSG00000022419	Deptor	DEP domain containing MTOR-interacting protein	-0.693754	1.49048e-05	0.000746106	-0.538251	0.000147927	0.00900869	-0.126496	0.516743	0.999994	0.0290066	0.858372	0.999996
ENSMUSG00000021670	Hmgcr	3-hydroxy-3-methylglutaryl-Coenzyme A reductase	-0.484543	3.8207e-05	0.0109149	-0.400347	0.000178337	0.054527	-0.041202	0.809258	0.999994	0.042994	0.710232	0.999996
ENSMUSG00000036553	Sh3tc1	SH3 domain and tetratricopeptide repeats 1	-0.576027	7.86663e-06	0.00137796	-0.42069	0.000140138	0.0366679	-0.0364053	0.8385	0.999994	0.118932	0.280291	0.999996
ENSMUSG00000020648	Dus4l	dihydrouridine synthase 4-like (S. cerevisiae)	1.2075	1.08218e-08	1.3704e-07	1.36196	4.38552e-10	4.38001e-09	0.120658	0.576878	0.999994	0.275123	0.0292034	0.884194
ENSMUSG00000022893	Adamts1	a disintegrin-like and metallopeptidase (reprolysin type) with thrombospondin type 1 motif, 1	-0.7592	0.000327943	0.00426898	-0.605117	0.00147267	0.0165683	-0.130696	0.638074	0.999994	0.0233868	0.913732	0.999996
ENSMUSG00000038894	Irs2	insulin receptor substrate 2	-0.585456	4.94612e-05	0.00406821	-0.362356	0.0031205	0.18232	-0.179902	0.319445	0.999994	0.0431976	0.765208	0.999996
ENSMUSG00000027598	Itch	itchy, E3 ubiquitin protein ligase	-0.393669	2.78876e-05	0.0441374	-0.371569	3.04408e-05	0.0548886	-0.017542	0.901899	0.999994	0.00455797	0.963034	0.999996
ENSMUSG00000027709	Mccc1	methylcrotonoyl-Coenzyme A carboxylase 1 (alpha)	0.544483	5.58923e-07	0.000336502	0.69848	5.25955e-09	7.48016e-07	0.176693	0.151565	0.999994	0.33069	0.00036137	0.367514
ENSMUSG00000020689	Itgb3	integrin beta 3	-0.823802	0.00114723	0.0105384	-0.505644	0.0284207	0.140976	-0.315941	0.358245	0.999994	0.00221704	0.994908	0.999996
ENSMUSG00000025019	Lcor	ligand dependent nuclear receptor corepressor	-0.710863	6.05037e-06	0.000309045	-1.04358	2.37962e-08	4.25434e-07	-0.222456	0.218811	0.999994	-0.555176	0.000365515	0.0269929
ENSMUSG00000025732	Mcrip2	MAPK regulated corepressor interacting protein 2	0.689692	1.87943e-05	0.000901674	0.842312	6.69608e-07	1.77275e-05	0.00723478	0.976037	0.999994	0.159855	0.226376	0.999996
ENSMUSG00000040043	Rbms2	RNA binding motif, single stranded interacting protein 2	0.455432	2.7961e-06	0.00474847	0.607206	2.63354e-08	1.00081e-05	-0.159375	0.166177	0.999994	-0.00760136	0.933722	0.999996
ENSMUSG00000074063	Osgin1	oxidative stress induced growth inhibitor 1	-0.702541	3.38096e-07	3.01821e-05	-0.551564	2.5549e-06	0.000708582	0.0694803	0.641634	0.999994	0.220457	0.0336421	0.999996
ENSMUSG00000018334	Ksr1	kinase suppressor of ras 1	-0.475523	0.000752975	0.0498349	-0.357472	0.00535656	0.21317	-0.0212807	0.931203	0.999994	0.09677	0.505949	0.999996
ENSMUSG00000042978	Sbk1	SH3-binding kinase 1	-0.652004	2.17046e-05	0.00133924	-0.501063	0.000213936	0.0158921	-0.0497702	0.818571	0.999994	0.101171	0.471297	0.999996
ENSMUSG00000028613	Lrp8	low density lipoprotein receptor-related protein 8, apolipoprotein e receptor	-0.435252	4.60919e-05	0.0252857	-0.342216	0.00037408	0.163137	-0.138485	0.3035	0.999994	-0.0454479	0.663706	0.999996
ENSMUSG00000035521	Gnptg	N-acetylglucosamine-1-phosphotransferase, gamma subunit	0.43395	8.27899e-05	0.0328867	0.584889	8.71857e-07	0.000213622	0.183334	0.203878	0.999994	0.334273	0.00150469	0.430818
ENSMUSG00000071456	1110002L01Rik	RIKEN cDNA 1110002L01 gene	0.576994	2.53551e-06	0.000639687	0.725139	4.53772e-08	3.79891e-06	0.00858725	0.96245	0.999994	0.156732	0.0964725	0.999996
ENSMUSG00000024654	Asrgl1	asparaginase like 1	0.776221	0.00542778	0.0372013	0.924328	0.000823228	0.0052539	0.146008	0.761045	0.999994	0.294115	0.273389	0.953492
ENSMUSG00000035621	Midn	midnolin	-0.480215	2.56316e-05	0.0095751	-0.227634	0.0132407	0.809348	-0.175433	0.211424	0.999994	0.0771475	0.45384	0.999996
ENSMUSG00000038244	Mical2	microtubule associated monooxygenase, calponin and LIM domain containing 2	-0.566765	2.63445e-06	0.000751672	-0.419448	5.2173e-05	0.0263443	-0.137261	0.313812	0.999994	0.010056	0.931369	0.999996
ENSMUSG00000030681	Mvp	major vault protein	-0.524157	2.9774e-07	0.000288956	-0.242004	0.000949947	0.767717	0.00179694	0.988519	0.999994	0.28395	0.000784227	0.752151
ENSMUSG00000068290	Ddrgk1	DDRGK domain containing 1	0.53715	5.60695e-06	0.00181207	0.68445	9.42136e-08	1.08642e-05	0.156352	0.262655	0.999994	0.303653	0.00305579	0.646539
ENSMUSG00000054008	Ndst1	N-deacetylase/N-sulfotransferase (heparan glucosaminyl) 1	-0.450667	6.32832e-05	0.0226373	-0.177919	0.0520553	0.999999	-0.158448	0.268454	0.999994	0.114301	0.262095	0.999996
ENSMUSG00000037499	Nenf	neuron derived neurotrophic factor	0.467907	0.000340197	0.0376644	0.212739	0.0592444	0.839626	-0.0247884	0.910977	0.999994	-0.279956	0.0239027	0.857773
ENSMUSG00000055994	Nod2	nucleotide-binding oligomerization domain containing 2	-1.05863	0.00170366	0.0110612	-0.71917	0.017468	0.0696291	-0.132186	0.795519	0.999994	0.207271	0.584688	0.999996
ENSMUSG00000027878	Notch2	notch 2	-0.613331	1.0456e-05	0.00105324	-0.383699	0.000897238	0.106727	-0.300502	0.0924424	0.999994	-0.0708701	0.567175	0.999996
ENSMUSG00000057113	Npm1	nucleophosmin 1	0.638691	3.65413e-05	0.0020818	0.41313	0.0017682	0.0923706	0.0451179	0.846738	0.999994	-0.180443	0.181743	0.999996
ENSMUSG00000037664	Cdkn1c	cyclin-dependent kinase inhibitor 1C (P57)	0.601224	6.71354e-05	0.00433385	0.747216	1.32166e-06	5.78509e-05	0.396298	0.0736476	0.999994	0.54229	0.000264461	0.0258659
ENSMUSG00000030738	Eif3c	eukaryotic translation initiation factor 3, subunit C	0.505286	2.90081e-07	0.000399999	0.651068	2.86981e-09	7.48016e-07	0.0688357	0.516065	0.999994	0.214617	0.00466022	0.999996
ENSMUSG00000032501	Trib1	tribbles pseudokinase 1	-0.844104	8.48891e-07	2.62991e-05	-0.698685	4.36387e-06	0.000202843	-0.124654	0.501663	0.999994	0.0207646	0.895325	0.999996
ENSMUSG00000026456	Cyb5r1	cytochrome b5 reductase 1	1.36274	2.56843e-12	2.36595e-11	1.50667	1.09929e-13	7.2219e-13	0.145476	0.218934	0.999994	0.289407	0.00117408	0.718441
ENSMUSG00000043760	Pkhd1	polycystic kidney and hepatic disease 1	-0.508959	0.00186136	0.0499822	-0.304783	0.0365429	0.429704	-0.240157	0.287871	0.999994	-0.0359803	0.841875	0.999996
ENSMUSG00000024998	Plce1	phospholipase C, epsilon 1	-0.673631	0.00027807	0.00642022	-0.0684071	0.685499	0.999999	-0.358818	0.153475	0.999994	0.246407	0.161199	0.999996
ENSMUSG00000018217	Pmp22	peripheral myelin protein 22	-0.959295	0.00134049	0.0104664	0.21612	0.391383	0.811922	-0.168855	0.694703	0.999994	1.00656	0.00168728	0.0192688
ENSMUSG00000037820	Tgm2	transglutaminase 2, C polypeptide	-0.594407	4.83295e-07	0.000144995	-0.450567	7.51792e-06	0.00666002	0.0567269	0.676298	0.999994	0.200567	0.0254901	0.999996
ENSMUSG00000041650	Pcca	propionyl-Coenzyme A carboxylase, alpha polypeptide	0.641634	1.99646e-06	0.000259483	0.785355	4.17964e-08	2.11282e-06	0.111724	0.486535	0.999994	0.255446	0.0140778	0.999996
ENSMUSG00000051043	Gprc5c	G protein-coupled receptor, family C, group 5, member C	-0.769835	1.9769e-08	1.39255e-06	-0.626241	1.27735e-07	2.82578e-05	-0.0652186	0.633844	0.999994	0.0783754	0.400524	0.999996
ENSMUSG00000019913	Sim1	single-minded family bHLH transcription factor 1	-1.02519	1.2074e-07	2.66464e-06	-1.0185	6.5488e-08	1.24219e-06	-0.28265	0.149438	0.999994	-0.275956	0.0577904	0.890882
ENSMUSG00000027540	Ptpn1	protein tyrosine phosphatase, non-receptor type 1	-0.447403	7.84564e-06	0.00901683	-0.353002	6.72625e-05	0.0971248	-0.0740269	0.54411	0.999994	0.0203741	0.83333	0.999996
ENSMUSG00000051978	Erich1	glutamate rich 1	0.437781	8.76709e-05	0.0317969	0.581	1.28703e-06	0.000293487	0.0703823	0.656976	0.999994	0.213602	0.0299027	0.999996
ENSMUSG00000027185	Nat10	N-acetyltransferase 10	0.417037	8.88816e-06	0.0172864	0.559522	7.79641e-08	5.2847e-05	-0.0026637	0.985067	0.999994	0.139821	0.068565	0.999996
ENSMUSG00000062232	Rapgef2	Rap guanine nucleotide exchange factor (GEF) 2	-0.487792	2.07821e-05	0.00775891	-0.38797	0.000165383	0.0651649	-0.176707	0.205895	0.999994	-0.076885	0.459928	0.999996
ENSMUSG00000060012	Kif13b	kinesin family member 13B	-0.746299	4.28203e-07	2.62991e-05	-0.606035	2.85828e-06	0.000376179	-0.157366	0.310243	0.999994	-0.0171015	0.896363	0.999996
ENSMUSG00000074577	Ripor3	RIPOR family member 3	-0.648625	0.000209392	0.00628991	-0.50855	0.00133524	0.0344392	-0.0740132	0.769581	0.999994	0.0660619	0.724691	0.999996
ENSMUSG00000021250	Fos	FBJ osteosarcoma oncogene	-0.84725	1.49853e-05	0.000322042	-0.972557	1.03831e-06	1.65658e-05	0.160654	0.480466	0.999994	0.0353474	0.860922	0.999996
ENSMUSG00000032548	Slco2a1	solute carrier organic anion transporter family, member 2a1	-0.551741	1.69613e-06	0.000667481	-0.415341	2.84659e-05	0.0226418	-0.145279	0.254674	0.999994	-0.00887864	0.935159	0.999996
ENSMUSG00000021703	Serinc5	serine incorporator 5	-0.525446	2.23962e-05	0.00491769	-0.169341	0.0785948	0.999999	-0.140322	0.351975	0.999994	0.215783	0.0464204	0.999996
ENSMUSG00000030505	Prmt3	protein arginine N-methyltransferase 3	0.570447	3.27808e-07	0.000144618	0.705832	4.23132e-09	5.71281e-07	0.187847	0.131189	0.999994	0.323232	0.000420001	0.421272
ENSMUSG00000006732	Mettl1	methyltransferase like 1	0.498524	6.03398e-06	0.00338249	0.629942	1.1505e-07	2.51517e-05	-0.0117121	0.947478	0.999994	0.119707	0.172499	0.999996
ENSMUSG00000025889	Snca	synuclein, alpha	0.697953	0.000906505	0.0126446	0.430352	0.0171277	0.16062	0.49444	0.116576	0.999994	0.22684	0.241746	0.999996
ENSMUSG00000033906	Zdhhc15	zinc finger, DHHC domain containing 15	-0.740049	4.02592e-06	0.000193533	-0.609872	2.37163e-05	0.00153272	-0.189943	0.296747	0.999994	-0.0597654	0.687857	0.999996
ENSMUSG00000026479	Lamc2	laminin, gamma 2	-0.718109	3.63876e-07	2.76823e-05	-0.588066	2.03834e-06	0.00036892	-0.0706499	0.657632	0.999994	0.059393	0.595379	0.999996
ENSMUSG00000039646	Vasn	vasorin	-0.846339	5.47055e-06	0.000138725	-0.716299	2.62827e-05	0.0007189	-0.284451	0.179789	0.999994	-0.154411	0.345638	0.999996
ENSMUSG00000020131	Pcsk4	proprotein convertase subtilisin/kexin type 4	0.574176	0.00179762	0.0354206	0.70396	0.000148567	0.00260688	0.14489	0.608877	0.999994	0.274674	0.11133	0.910731
ENSMUSG00000031958	Ldhd	lactate dehydrogenase D	-0.715152	0.000274796	0.00526833	-0.585487	0.000975819	0.0170362	0.0832779	0.767696	0.999994	0.212943	0.26282	0.999996
ENSMUSG00000029287	Tgfbr3	transforming growth factor, beta receptor III	-0.537572	0.00127196	0.0359205	-0.0827886	0.593145	0.999999	-0.336069	0.156724	0.999994	0.118715	0.486732	0.999996
ENSMUSG00000002489	Tiam1	T cell lymphoma invasion and metastasis 1	-0.635017	6.93642e-06	0.000676464	-0.392	0.000728902	0.0920443	-0.122829	0.457731	0.999994	0.120188	0.316983	0.999996
ENSMUSG00000040213	Kyat3	kynurenine aminotransferase 3	0.686166	0.000111103	0.00329517	0.8147	7.57125e-06	0.000155554	0.0425678	0.884654	0.999994	0.171101	0.266489	0.999996
ENSMUSG00000035547	Capn5	calpain 5	-0.618797	7.99109e-08	2.43273e-05	-0.490494	7.25751e-07	0.000878118	-0.0821049	0.477928	0.999994	0.0461981	0.595253	0.999996
ENSMUSG00000028977	Casz1	castor zinc finger 1	-0.785576	1.13329e-05	0.000332953	-0.657871	6.37867e-05	0.00197176	-0.319515	0.140878	0.999994	-0.19181	0.227759	0.999996
ENSMUSG00000009621	Vav2	vav 2 oncogene	-0.470586	4.69926e-05	0.0147493	-0.381855	0.000263953	0.0811851	-0.0487125	0.764405	0.999994	0.0400184	0.72775	0.999996
ENSMUSG00000041482	Piezo2	piezo-type mechanosensitive ion channel component 2	-0.941121	9.95684e-07	2.16899e-05	-0.813685	3.13502e-06	7.48497e-05	-0.191749	0.346185	0.999994	-0.0643141	0.705252	0.999996
ENSMUSG00000032741	Tpcn1	two pore channel 1	-0.520814	1.30512e-06	0.000899607	-0.394267	2.09318e-05	0.0304562	-0.158683	0.182236	0.999994	-0.0321363	0.734972	0.999996
ENSMUSG00000044786	Zfp36	zinc finger protein 36	-0.464277	2.52665e-05	0.0119558	-0.263605	0.00352764	0.586821	-0.0422812	0.779323	0.999994	0.158391	0.100023	0.999996
ENSMUSG00000054091	1810037I17Rik	RIKEN cDNA 1810037I17 gene	-0.0518467	0.697395	0.999996	-0.68105	1.28951e-05	0.00046483	-0.0279015	0.905499	0.999994	-0.657105	0.000117422	0.00580342
ENSMUSG00000029580	Actb	actin, beta	-0.188462	0.0751788	0.999996	-0.445463	0.000175134	0.0281245	0.211001	0.198651	0.999994	-0.0459992	0.718437	0.999996
ENSMUSG00000030790	Adm	adrenomedullin	-0.561771	0.0287943	0.157913	-1.16455	0.000123071	0.000673106	0.347827	0.344652	0.999994	-0.254947	0.370479	0.999996
ENSMUSG00000020961	Ston2	stonin 2	-0.648623	2.09861e-06	0.000250611	-0.522119	1.82213e-05	0.00345443	-0.256248	0.113939	0.999994	-0.129743	0.250374	0.999996
ENSMUSG00000050947	Amigo1	adhesion molecule with Ig like domain 1	-0.0636301	0.607151	0.999996	0.651038	5.59378e-06	0.000379602	-0.16678	0.360117	0.999994	0.547888	0.000202568	0.0205942
ENSMUSG00000022265	Ank	progressive ankylosis	0.343956	0.00805514	0.319247	0.7548	1.85704e-06	7.11812e-05	-0.0488427	0.835468	0.999994	0.362002	0.00747605	0.420053
ENSMUSG00000025980	Hspd1	heat shock protein 1 (chaperonin)	0.476527	5.28284e-06	0.00445249	0.602651	1.07615e-07	3.3885e-05	0.0577017	0.663952	0.999994	0.183826	0.0332045	0.999996
ENSMUSG00000032231	Anxa2	annexin A2	-0.158875	0.0593024	0.999996	-0.667778	5.67412e-08	8.3871e-06	0.265681	0.0723077	0.999994	-0.243222	0.00964751	0.999996
ENSMUSG00000002985	Apoe	apolipoprotein E	0.0890053	0.72723	0.999996	0.629024	0.00726262	0.0446734	-0.0981409	0.822057	0.999994	0.441877	0.0722303	0.470987
ENSMUSG00000060950	Trmt61a	tRNA methyltransferase 61A	0.478606	0.000370163	0.0352628	0.604601	1.58854e-05	0.0012367	0.0461634	0.836444	0.999994	0.172159	0.159785	0.999996
ENSMUSG00000115852	AC169509.1	BMP2 inducible kinase (Bmp2k) pseudogene	1.46395	4.56092e-07	3.69387e-06	1.58977	4.32778e-08	2.67142e-07	0.100188	0.834489	0.999994	0.22601	0.242421	0.999996
ENSMUSG00000030654	Arl6ip1	ADP-ribosylation factor-like 6 interacting protein 1	-0.211297	0.000763943	0.999996	-0.394459	3.3807e-07	0.0061831	0.094389	0.278512	0.999994	-0.088773	0.145049	0.999996
ENSMUSG00000035199	Arl6ip5	ADP-ribosylation factor-like 6 interacting protein 5	-0.0462662	0.578846	0.999996	-0.425318	1.15364e-05	0.0130632	0.0745236	0.557006	0.999994	-0.304528	0.00136799	0.60735
ENSMUSG00000064360	mt-Nd3	mitochondrially encoded NADH dehydrogenase 3	1.49372	2.7961e-06	1.55813e-05	1.61556	6.03248e-07	2.23616e-06	0.0453639	0.899766	0.999994	0.167203	0.416733	0.999996
ENSMUSG00000041921	Metap1d	methionyl aminopeptidase type 1D (mitochondrial)	0.411794	4.88192e-05	0.0382939	0.531788	9.47256e-07	0.000491321	0.101762	0.43467	0.999994	0.221756	0.013731	0.999996
ENSMUSG00000015619	Gata3	GATA binding protein 3	-0.742108	0.000642485	0.00856705	-0.970549	2.31361e-05	0.000251566	0.120153	0.698545	0.999994	-0.108288	0.651977	0.999996
ENSMUSG00000018770	Atp5g3	ATP synthase, H+ transporting, mitochondrial F0 complex, subunit C3 (subunit 9)	0.0118183	0.931001	0.999996	-0.641018	1.45652e-05	0.000729042	0.0402607	0.856605	0.999994	-0.612575	0.000136143	0.00893901
ENSMUSG00000022890	Atp5j	ATP synthase, H+ transporting, mitochondrial F0 complex, subunit F	0.0411878	0.706473	0.999996	-0.523859	1.90975e-05	0.00340269	-0.0237025	0.901784	0.999994	-0.588749	3.91718e-05	0.00494814
ENSMUSG00000050856	Atp5k	ATP synthase, H+ transporting, mitochondrial F1F0 complex, subunit E	-0.0191448	0.889146	0.999996	-0.592948	4.78539e-05	0.00250009	-0.154368	0.409068	0.999994	-0.728171	3.75208e-05	0.00159334
ENSMUSG00000019087	Atp6ap1	ATPase, H+ transporting, lysosomal accessory protein 1	-0.0681183	0.47586	0.999996	0.436888	4.37721e-05	0.0184382	0.0139982	0.940172	0.999994	0.519005	4.47485e-05	0.0111574
ENSMUSG00000042460	C1galt1	core 1 synthase, glycoprotein-N-acetylgalactosamine 3-beta-galactosyltransferase, 1	-0.609581	8.19034e-05	0.00427274	-0.490769	0.000457235	0.0240706	-0.115474	0.564503	0.999994	0.0033381	0.984071	0.999996
ENSMUSG00000037458	Azin1	antizyme inhibitor 1	-0.189954	0.0300136	0.999996	-0.426855	2.83454e-05	0.0183554	0.102982	0.440074	0.999994	-0.133919	0.151482	0.999996
ENSMUSG00000028789	Azin2	antizyme inhibitor 2	0.298316	0.0680224	0.546537	1.05199	6.73561e-07	1.00557e-05	-0.113714	0.68631	0.999994	0.63996	0.000682744	0.0230565
ENSMUSG00000060802	B2m	beta-2 microglobulin	0.384999	3.20186e-05	0.0546701	0.428522	4.92557e-06	0.00845299	-0.00469237	0.973124	0.999994	0.0388302	0.659542	0.999996
ENSMUSG00000057329	Bcl2	B cell leukemia/lymphoma 2	0.38372	0.00227974	0.174874	0.567003	3.1319e-05	0.00276766	-0.0285954	0.899004	0.999994	0.154687	0.204774	0.999996
ENSMUSG00000056498	Tmem154	transmembrane protein 154	1.40322	0.00154002	0.00759908	1.5215	0.0005513	0.00203595	-0.062211	0.949246	0.999994	0.0560611	0.900317	0.999996
ENSMUSG00000026278	Bok	BCL2-related ovarian killer	-0.138179	0.0937543	0.999996	-0.513445	1.60389e-06	0.000943633	0.164117	0.198638	0.999994	-0.211149	0.0203174	0.999996
ENSMUSG00000032373	Car12	carbonic anhydrase 12	0.142362	0.174493	0.999996	0.836781	3.58855e-08	1.33667e-06	-0.0274458	0.889071	0.999994	0.666974	1.09171e-05	0.000898552
ENSMUSG00000027562	Car2	carbonic anhydrase 2	-0.180419	0.0654853	0.999996	-0.645655	7.35514e-07	8.95388e-05	0.166317	0.265126	0.999994	-0.298919	0.00730794	0.71169
ENSMUSG00000034667	Xpot	exportin, tRNA (nuclear export receptor for tRNAs)	0.582748	3.31201e-07	0.000123307	0.69978	8.91231e-09	1.18171e-06	0.0310176	0.829331	0.999994	0.148049	0.0748549	0.999996
ENSMUSG00000040410	Fbxl4	F-box and leucine-rich repeat protein 4	0.471651	1.71625e-05	0.00892049	0.588378	3.33585e-07	9.83984e-05	0.262023	0.0851158	0.999994	0.378749	0.000310282	0.174793
[truncated: 11,238 more rows]
