# Supplementary material for: Doxycycline Changes the Transcriptome Profile of mIMCD3 Renal Epithelial Cells
Source: Front Physiol. 2021 Nov 5;12:771691. doi: 10.3389/fphys.2021.771691 (PMC8602682; doi:10.3389/fphys.2021.771691)
Supplement: Supplementary file 3 [file Table_3.XLSX]

## Sheet: Signaling_Pathways
Ensembl_gene_ID	Gene_symbol	Description	Log2Ratio_3D	FDR (20% threshold) 3D	Log2Ratio_6D	FDR (20% threshold) 6D	ERK signaling	cAMP signaling	Notch signaling	Transcription factors/ Kinases
ENSMUSG00000027962	Vcam1	vascular cell adhesion molecule 1	-2.40344	8.41479e-08	-2.35165	7.15063e-08	No	Yes	No
ENSMUSG00000022598	Psca	prostate stem cell antigen	-1.89654	1.4205e-08	-2.93292	1.71172e-11	Yes	No	No
ENSMUSG00000017493	Igfbp4	insulin-like growth factor binding protein 4	-1.7282	1.3716e-07	-2.22591	1.85369e-09	Yes	No	No
ENSMUSG00000079415	Cntf	ciliary neurotrophic factor	-1.66177	5.88621e-10	-2.05064	8.71574e-12	Yes	No	No
ENSMUSG00000027931	Npr1	natriuretic peptide receptor 1	-1.62769	3.13528e-05	-2.26193	1.65972e-07	No	Yes	No	Kinase
ENSMUSG00000043430	Psapl1	prosaposin-like 1	-1.58728	0.00186012	-1.36176	0.00319733	No	Yes	No
ENSMUSG00000035638	Muc20	mucin 20	-1.56252	1.23459e-08	-1.50797	6.49574e-09	Yes	No	No
ENSMUSG00000027843	Ptpn22	protein tyrosine phosphatase, non-receptor type 22 (lymphoid)	-1.45274	4.23187e-06	-2.28763	5.17258e-09	Yes	No	No
ENSMUSG00000028004	Npy2r	neuropeptide Y receptor Y2	-1.4506	0.000176656	-1.65348	1.58241e-05	No	Yes	No
ENSMUSG00000020681	Ace	angiotensin I converting enzyme (peptidyl-dipeptidase A) 1	-1.42981	0.00359687	-0.54929	0.343165	Yes	Yes	No
ENSMUSG00000074272	Ceacam1	carcinoembryonic antigen-related cell adhesion molecule 1	-1.39559	0.000129841	-1.75629	4.64494e-06	Yes	Yes	No
ENSMUSG00000029335	Bmp3	bone morphogenetic protein 3	-1.39076	6.91472e-09	-1.30415	4.03714e-09	Yes	No	No
ENSMUSG00000027314	Dll4	delta like canonical Notch ligand 4	-1.38716	0.00575461	-0.827972	0.0934521	No	No	Yes
ENSMUSG00000042284	Itga1	integrin alpha 1	-1.32838	4.83987e-07	-1.58579	1.0176e-08	Yes	No	No
ENSMUSG00000027358	Bmp2	bone morphogenetic protein 2	-1.28643	0.0491291	-2.0056	0.00202962	Yes	No	Yes
ENSMUSG00000024164	C3	complement component 3	-1.28359	0.000845335	-0.0404525	0.999999	Yes	No	No
ENSMUSG00000004655	Aqp1	aquaporin 1	-1.19017	0.0286976	-0.865795	0.0815081	No	Yes	No
ENSMUSG00000038264	Sema7a	sema domain, immunoglobulin domain (Ig), and GPI membrane anchor, (semaphorin) 7A	-1.18305	1.18676e-05	-1.51966	1.42473e-07	Yes	No	No
ENSMUSG00000019966	Kitl	kit ligand	-1.15673	1.01349e-05	-1.07107	1.04938e-05	Yes	No	No
ENSMUSG00000060487	Samd5	sterile alpha motif domain containing 5	-1.14284	0.00421168	-1.72048	5.35165e-05	Yes	No	No
ENSMUSG00000055994	Nod2	nucleotide-binding oligomerization domain containing 2	-1.05863	0.0110612	-0.71917	0.0696291	Yes	No	Yes
ENSMUSG00000035451	Foxa1	forkhead box A1	-1.02854	0.000269169	-1.10329	6.83149e-05	No	No	Yes	TF
ENSMUSG00000038668	Lpar1	lysophosphatidic acid receptor 1	-1.01878	0.00322315	-0.794852	0.0136263	Yes	Yes	No
ENSMUSG00000033327	Tnxb	tenascin XB	-1.01175	0.0301697	-2.0081	9.72526e-05	Yes	No	No
ENSMUSG00000040152	Thbs1	thrombospondin 1	-1.00832	0.000477911	-0.953638	0.000400118	Yes	Yes	No
ENSMUSG00000039601	Rcan2	regulator of calcineurin 2	-1.0034	0.0105145	-0.192668	0.90622	No	Yes	Yes
ENSMUSG00000015468	Notch4	notch 4	-0.963515	0.0432949	-1.59292	0.000637497	No	No	Yes
ENSMUSG00000039384	Dusp10	dual specificity phosphatase 10	-0.963031	2.16521e-07	-1.46056	6.13388e-11	Yes	No	No
ENSMUSG00000030110	Ret	ret proto-oncogene	-0.959383	0.0241995	-1.4625	0.000720871	Yes	No	No	Kinase
ENSMUSG00000018217	Pmp22	peripheral myelin protein 22	-0.959295	0.0104664	0.21612	0.811922	Yes	No	No
ENSMUSG00000005672	Kit	KIT proto-oncogene receptor tyrosine kinase	-0.957149	0.00744826	-1.02396	0.00276254	Yes	No	Yes	Kinase
ENSMUSG00000031853	Map3k21	mitogen-activated protein kinase kinase kinase 21	-0.945981	4.62532e-06	-0.664861	0.000418746	Yes	No	No	Kinase
ENSMUSG00000024190	Dusp1	dual specificity phosphatase 1	-0.933657	8.98063e-07	-1.43424	1.59574e-10	Yes	No	No
ENSMUSG00000019647	Sema6a	sema domain, transmembrane domain (TM), and cytoplasmic domain, (semaphorin) 6A	-0.907258	0.0241622	-1.84582	2.13173e-05	Yes	No	No
ENSMUSG00000025810	Nrp1	neuropilin 1	-0.896193	1.87358e-06	-1.08119	3.31961e-08	Yes	No	No
ENSMUSG00000026576	Atp1b1	ATPase, Na+/K+ transporting, beta 1 polypeptide	-0.87363	1.60215e-08	-0.653509	1.96347e-06	No	Yes	No
ENSMUSG00000021699	Pde4d	phosphodiesterase 4D, cAMP specific	-0.858367	0.00728137	-1.06537	0.000519856	No	Yes	No
ENSMUSG00000044337	Ackr3	atypical chemokine receptor 3	-0.853519	0.00600482	-1.26608	4.00392e-05	Yes	Yes	No
ENSMUSG00000040998	Npnt	nephronectin	-0.852225	6.56846e-06	-0.616917	0.000513812	Yes	No	No
ENSMUSG00000028967	Errfi1	ERBB receptor feedback inhibitor 1	-0.844808	2.47774e-08	-0.898176	2.75574e-09	Yes	No	No
ENSMUSG00000032501	Trib1	tribbles pseudokinase 1	-0.844104	2.62991e-05	-0.698685	0.000202843	Yes	No	No	Kinase
ENSMUSG00000052684	Jun	jun proto-oncogene	-0.836679	1.57637e-05	-1.25809	7.86903e-09	Yes	No	No	TF
ENSMUSG00000028664	Ephb2	Eph receptor B2	-0.826827	0.000541834	-0.496169	0.0458805	Yes	No	No	Kinase
ENSMUSG00000020689	Itgb3	integrin beta 3	-0.823802	0.0105384	-0.505644	0.140976	Yes	Yes	No
ENSMUSG00000024621	Csf1r	colony stimulating factor 1 receptor	-0.821162	0.0071339	-0.627453	0.0343722	Yes	No	No	Kinase
ENSMUSG00000038587	Akap12	A kinase (PRKA) anchor protein (gravin) 12	-0.810838	3.50059e-06	-0.908386	1.61396e-07	Yes	Yes	No
ENSMUSG00000002885	Adgre5	adhesion G protein-coupled receptor E5	-0.808668	9.38673e-07	-0.738328	1.89627e-06	No	Yes	No
ENSMUSG00000050295	Foxc1	forkhead box C1	-0.806639	1.7918e-05	-0.58967	0.00104952	No	No	Yes	TF
ENSMUSG00000028698	Pik3r3	phosphoinositide-3-kinase regulatory subunit 3	-0.790131	0.00141189	0.0192905	0.999999	Yes	No	No	Kinase
ENSMUSG00000039952	Dag1	dystroglycan 1	-0.767394	2.35154e-05	-0.608141	0.00045383	Yes	No	No
ENSMUSG00000022037	Clu	clusterin	-0.760933	5.3789e-06	-0.747721	2.49804e-06	Yes	No	No
ENSMUSG00000021360	Gcnt2	glucosaminyl (N-acetyl) transferase 2, I-branching enzyme	-0.745952	2.92123e-05	-0.669022	7.81504e-05	Yes	No	No
ENSMUSG00000032440	Tgfbr2	transforming growth factor, beta receptor II	-0.734055	8.98063e-07	-0.787908	7.55717e-08	Yes	No	Yes	Kinase
ENSMUSG00000027684	Mecom	MDS1 and EVI1 complex locus	-0.725695	0.000562098	-0.416177	0.097468	Yes	No	No	TF
ENSMUSG00000028551	Cdkn2c	cyclin dependent kinase inhibitor 2C	-0.710953	1.13759e-05	-0.856884	1.45317e-07	Yes	No	No
ENSMUSG00000028525	Pde4b	phosphodiesterase 4B, cAMP specific	-0.706636	0.0321899	-0.0854362	0.999999	No	Yes	No
ENSMUSG00000021457	Syk	spleen tyrosine kinase	-0.703766	0.0274128	-0.389506	0.318426	Yes	Yes	No	Kinase
ENSMUSG00000026235	Epha4	Eph receptor A4	-0.701369	0.00150422	-0.962459	1.01511e-05	Yes	No	No	Kinase
ENSMUSG00000022419	Deptor	DEP domain containing MTOR-interacting protein	-0.693754	0.000746106	-0.538251	0.00900869	Yes	No	No
ENSMUSG00000047281	Sfn	stratifin	-0.689958	2.62831e-05	-1.18109	6.11567e-10	Yes	No	No
ENSMUSG00000031841	Cdh13	cadherin 13	-0.686176	0.0139039	-0.747261	0.00348317	No	Yes	No
ENSMUSG00000009376	Met	met proto-oncogene	-0.685167	0.000239007	-0.632604	0.00037346	Yes	No	No	Kinase
ENSMUSG00000048878	Hexim1	hexamethylene bis-acetamide inducible 1	-0.675541	1.30407e-05	-0.782521	2.53751e-07	Yes	No	No
ENSMUSG00000024998	Plce1	phospholipase C, epsilon 1	-0.673631	0.00642022	-0.0684071	0.999999	Yes	No	No
ENSMUSG00000037824	Tspan14	tetraspanin 14	-0.66941	2.33368e-06	-0.499373	0.000348267	No	No	Yes
ENSMUSG00000003228	Grk5	G protein-coupled receptor kinase 5	-0.659915	0.0245143	-0.849362	0.00143126	No	Yes	No	Kinase
ENSMUSG00000027765	P2ry1	purinergic receptor P2Y, G-protein coupled 1	-0.64287	0.00750835	-1.18964	1.53998e-06	Yes	Yes	No
ENSMUSG00000007817	Zmiz1	zinc finger, MIZ-type containing 1	-0.636441	0.000612224	-0.704966	6.32907e-05	No	No	Yes	TF
ENSMUSG00000002489	Tiam1	T cell lymphoma invasion and metastasis 1	-0.635017	0.000676464	-0.392	0.0920443	Yes	No	No
ENSMUSG00000008734	Gprc5b	G protein-coupled receptor, family C, group 5, member B	-0.634532	0.00846422	-0.202818	0.827902	Yes	No	No
ENSMUSG00000066406	Akap13	A kinase (PRKA) anchor protein 13	-0.632095	0.00386438	-0.721415	0.000419713	Yes	Yes	No
ENSMUSG00000031024	St5	suppression of tumorigenicity 5	-0.630271	0.000273866	-0.471018	0.00945502	Yes	No	No
ENSMUSG00000027087	Itgav	integrin alpha V	-0.615187	0.00115108	-0.63536	0.000353495	Yes	No	No
ENSMUSG00000027878	Notch2	notch 2	-0.613331	0.00105324	-0.383699	0.106727	Yes	No	Yes
ENSMUSG00000019850	Tnfaip3	tumor necrosis factor, alpha-induced protein 3	-0.607918	7.10118e-05	-0.81766	7.90533e-08	Yes	No	No
ENSMUSG00000034413	Neurl1b	neuralized E3 ubiquitin protein ligase 1B	-0.607834	0.00774691	-0.779289	0.000207664	No	No	Yes
ENSMUSG00000025473	Adam8	a disintegrin and metallopeptidase domain 8	-0.606603	0.000585485	-1.07891	1.38128e-08	Yes	No	No
ENSMUSG00000074794	Arrdc3	arrestin domain containing 3	-0.606416	0.000315066	-1.01327	1.36633e-08	Yes	Yes	No
ENSMUSG00000041046	Ramp3	receptor (calcitonin) activity modifying protein 3	-0.604555	0.00015066	-0.660855	1.2216e-05	Yes	Yes	No
ENSMUSG00000057230	Aak1	AP2 associated kinase 1	-0.602868	0.000384189	-0.533726	0.00139491	No	No	Yes	Kinase
ENSMUSG00000039942	Ptger4	prostaglandin E receptor 4 (subtype EP4)	-0.600988	0.00556863	-0.590516	0.00347142	Yes	Yes	No
ENSMUSG00000038967	Pdk2	pyruvate dehydrogenase kinase, isoenzyme 2	-0.595493	0.016382	-0.294069	0.471774	No	Yes	No	Kinase
ENSMUSG00000042489	Clspn	claspin	-0.594792	0.000125871	-0.767842	3.73168e-07	Yes	No	No
ENSMUSG00000021367	Edn1	endothelin 1	-0.591801	0.00358013	-0.838487	7.39712e-06	Yes	Yes	No
ENSMUSG00000015202	Cnksr3	Cnksr family member 3	-0.591607	0.000127355	-0.564037	0.000130797	Yes	No	No
ENSMUSG00000021182	Ccdc88c	coiled-coil domain containing 88C	-0.590492	0.000819789	-0.564253	0.000886018	Yes	No	No
ENSMUSG00000031626	Sorbs2	sorbin and SH3 domain containing 2	-0.587294	0.00401086	-0.896487	3.66923e-06	No	No	Yes
ENSMUSG00000038894	Irs2	insulin receptor substrate 2	-0.585456	0.00406821	-0.362356	0.18232	Yes	No	No
ENSMUSG00000062312	Erbb2	erb-b2 receptor tyrosine kinase 2	-0.58519	0.00112444	-0.389257	0.0792364	Yes	No	No	Kinase
ENSMUSG00000054252	Fgfr3	fibroblast growth factor receptor 3	-0.584239	0.0351126	-0.526275	0.0438201	Yes	No	No	Kinase
ENSMUSG00000042029	Ncapg2	non-SMC condensin II complex, subunit G2	-0.583891	0.000566987	-0.869532	1.82418e-07	Yes	No	No
ENSMUSG00000031642	Sh3rf1	SH3 domain containing ring finger 1	-0.570724	0.00646915	-0.575585	0.00328069	Yes	No	No
ENSMUSG00000021453	Gadd45g	growth arrest and DNA-damage-inducible 45 gamma	-0.565194	0.00964217	-0.637916	0.00126438	Yes	No	No
ENSMUSG00000038976	Ppp1r9b	protein phosphatase 1, regulatory subunit 9B	-0.564944	0.00863049	0.114502	0.999999	No	Yes	No
ENSMUSG00000000568	Hnrnpd	heterogeneous nuclear ribonucleoprotein D	-0.55956	0.000117403	-0.950471	1.16201e-09	Yes	No	No
ENSMUSG00000071369	Map3k5	mitogen-activated protein kinase kinase kinase 5	-0.557482	0.00189818	-0.519679	0.00276339	Yes	No	No	Kinase
ENSMUSG00000070056	Mfhas1	malignant fibrous histiocytoma amplified sequence 1	-0.54818	0.000285318	-0.443149	0.00542712	Yes	No	No
ENSMUSG00000020679	Hnf1b	HNF1 homeobox B	-0.543858	0.000903207	-0.553584	0.000321752	No	No	Yes	TF
ENSMUSG00000026031	Cflar	CASP8 and FADD-like apoptosis regulator	-0.541589	0.00523161	-0.556818	0.00198528	Yes	No	No
ENSMUSG00000028068	Iqgap3	IQ motif containing GTPase activating protein 3	-0.538547	0.00395951	-0.810327	2.16436e-06	Yes	No	No
ENSMUSG00000029287	Tgfbr3	transforming growth factor, beta receptor III	-0.537572	0.0359205	-0.0827886	0.999999	Yes	No	No
ENSMUSG00000017499	Cdc6	cell division cycle 6	-0.537129	0.000927502	-1.02935	2.71198e-09	Yes	No	No
ENSMUSG00000075254	Heg1	heart development protein with EGF-like domains 1	-0.530641	0.0377804	-0.287529	0.496999	Yes	No	No
ENSMUSG00000052397	Ezr	ezrin	-0.526182	7.72449e-05	-0.60206	1.46674e-06	Yes	No	No
ENSMUSG00000045005	Fzd5	frizzled class receptor 5	-0.526042	0.00476891	-0.397458	0.0660414	Yes	No	No
ENSMUSG00000021703	Serinc5	serine incorporator 5	-0.525446	0.00491769	-0.169341	0.999999	Yes	No	No
ENSMUSG00000030681	Mvp	major vault protein	-0.524157	0.000288956	-0.242004	0.767717	Yes	No	No
ENSMUSG00000020911	Krt19	keratin 19	-0.519435	0.00179022	-1.08972	9.00314e-10	No	No	Yes
ENSMUSG00000026024	Als2	alsin Rho guanine nucleotide exchange factor	-0.516949	0.00124353	-0.533754	0.000358007	Yes	No	No
ENSMUSG00000049791	Fzd4	frizzled class receptor 4	-0.514575	0.0154568	-0.399013	0.10096	Yes	No	No
ENSMUSG00000031668	Eif2ak3	eukaryotic translation initiation factor 2 alpha kinase 3	-0.513365	0.0172864	-0.785289	2.62447e-05	No	Yes	No	Kinase
ENSMUSG00000044167	Foxo1	forkhead box O1	-0.512563	0.00676264	-0.39233	0.0742524	Yes	No	No	TF
ENSMUSG00000043760	Pkhd1	polycystic kidney and hepatic disease 1	-0.508959	0.0499822	-0.304783	0.429704	Yes	No	No
ENSMUSG00000018909	Arrb1	arrestin, beta 1	-0.50851	0.0150264	-0.39569	0.0987959	Yes	No	Yes
ENSMUSG00000074923	Pak6	p21 (RAC1) activated kinase 6	-0.50565	0.0128099	-0.397161	0.0850879	Yes	No	No	Kinase
ENSMUSG00000035314	Gdpd5	glycerophosphodiester phosphodiesterase domain containing 5	-0.503295	0.0106047	0.0121069	0.999999	No	No	Yes
ENSMUSG00000019960	Dusp6	dual specificity phosphatase 6	-0.502274	0.00628991	-0.777029	1.85359e-06	Yes	No	No
ENSMUSG00000057614	Gnai1	guanine nucleotide binding protein (G protein), alpha inhibiting 1	-0.501983	0.0470332	-0.263003	0.592926	No	Yes	No
ENSMUSG00000038418	Egr1	early growth response 1	-0.500085	0.00459877	-0.590438	0.000161416	Yes	No	No	TF
ENSMUSG00000027276	Jag1	jagged 1	-0.495204	0.0253472	-0.32672	0.301685	No	No	Yes
ENSMUSG00000028184	Adgrl2	adhesion G protein-coupled receptor L2	-0.495166	0.00497617	-0.521754	0.00127345	No	Yes	No
ENSMUSG00000002997	Prkar2b	protein kinase, cAMP dependent regulatory, type II beta	-0.494017	0.0166819	-0.533545	0.00400245	Yes	Yes	No	Kinase
ENSMUSG00000062232	Rapgef2	Rap guanine nucleotide exchange factor (GEF) 2	-0.487792	0.00775891	-0.38797	0.0651649	Yes	Yes	No
ENSMUSG00000021670	Hmgcr	3-hydroxy-3-methylglutaryl-Coenzyme A reductase	-0.484543	0.0109149	-0.400347	0.054527	Yes	No	No
ENSMUSG00000031778	Cx3cl1	chemokine (C-X3-C motif) ligand 1	-0.482614	0.0270412	-0.0249848	0.999999	Yes	No	No
ENSMUSG00000042429	Adora1	adenosine A1 receptor	-0.482382	0.0155176	0.0699414	0.999999	Yes	Yes	No
ENSMUSG00000035621	Midn	midnolin	-0.480215	0.0095751	-0.227634	0.809348	Yes	No	No
ENSMUSG00000032060	Cryab	crystallin, alpha B	-0.479245	0.000889201	-0.964389	2.09869e-10	Yes	No	No
ENSMUSG00000018334	Ksr1	kinase suppressor of ras 1	-0.475523	0.0498349	-0.357472	0.21317	Yes	Yes	No
ENSMUSG00000055320	Tead1	TEA domain family member 1	-0.472382	0.0179867	-0.585958	0.000568303	Yes	No	No	TF
ENSMUSG00000018166	Erbb3	erb-b2 receptor tyrosine kinase 3	-0.471085	0.00646915	-0.21562	0.907259	Yes	Yes	No	Kinase
ENSMUSG00000009621	Vav2	vav 2 oncogene	-0.470586	0.0147493	-0.381855	0.0811851	Yes	No	No
ENSMUSG00000022892	App	amyloid beta (A4) precursor protein	-0.469729	0.0273528	0.000305383	0.999999	Yes	No	Yes
ENSMUSG00000028073	Pear1	platelet endothelial aggregation receptor 1	-0.464468	0.00764351	-0.141052	0.999999	No	No	Yes
ENSMUSG00000044786	Zfp36	zinc finger protein 36	-0.464277	0.0119558	-0.263605	0.586821	Yes	No	No
ENSMUSG00000004054	Map3k11	mitogen-activated protein kinase kinase kinase 11	-0.463773	0.0178441	-0.108681	0.999999	Yes	No	No	Kinase
ENSMUSG00000020357	Flt4	FMS-like tyrosine kinase 4	-0.460006	0.0451402	-0.337745	0.255052	Yes	No	No	Kinase
ENSMUSG00000045328	Cenpe	centromere protein E	-0.459851	0.0146021	-0.626541	6.55812e-05	Yes	No	No
ENSMUSG00000035011	Zbtb7a	zinc finger and BTB domain containing 7a	-0.459559	0.0283929	-0.161111	0.999999	No	No	Yes	TF
ENSMUSG00000024590	Lmnb1	lamin B1	-0.459335	0.0022867	-0.768194	2.21559e-08	Yes	No	No
ENSMUSG00000052539	Magi3	membrane associated guanylate kinase, WW and PDZ domain containing 3	-0.45754	0.0161939	-0.534345	0.00105689	Yes	No	No	Kinase
ENSMUSG00000041498	Kif14	kinesin family member 14	-0.45372	0.0438372	-0.788971	1.25085e-05	Yes	No	No
ENSMUSG00000020733	Slc9a3r1	solute carrier family 9 (sodium/hydrogen exchanger), member 3 regulator 1	-0.451876	0.00955199	-0.472173	0.00273713	Yes	Yes	No
ENSMUSG00000054008	Ndst1	N-deacetylase/N-sulfotransferase (heparan glucosaminyl) 1	-0.450667	0.0226373	-0.177919	0.999999	Yes	No	No
ENSMUSG00000024695	Zfp91	zinc finger protein 91	-0.450424	0.0115321	-0.293416	0.382394	Yes	No	No	TF
ENSMUSG00000053716	Dusp7	dual specificity phosphatase 7	-0.44986	0.0155176	-0.415241	0.0252984	Yes	No	No
ENSMUSG00000027540	Ptpn1	protein tyrosine phosphatase, non-receptor type 1	-0.447403	0.00901683	-0.353002	0.0971248	Yes	No	No
ENSMUSG00000046733	Gprc5a	G protein-coupled receptor, family C, group 5, member A	-0.445768	0.00760328	-0.482032	0.00114682	Yes	No	No
ENSMUSG00000072082	Ccnf	cyclin F	-0.440728	0.0144217	-0.839436	6.71421e-08	Yes	No	No
ENSMUSG00000029570	Lfng	LFNG O-fucosylpeptide 3-beta-N-acetylglucosaminyltransferase	-0.436199	0.0459535	-0.722835	2.02572e-05	No	No	Yes
ENSMUSG00000028613	Lrp8	low density lipoprotein receptor-related protein 8, apolipoprotein e receptor	-0.435252	0.0252857	-0.342216	0.163137	Yes	No	No
ENSMUSG00000047139	Cd24a	CD24a antigen	-0.430754	0.034841	-0.641676	5.02675e-05	Yes	Yes	No
ENSMUSG00000005034	Prkacb	protein kinase, cAMP dependent, catalytic, beta	-0.425055	0.0219713	-0.467323	0.00340269	No	Yes	No	Kinase
ENSMUSG00000021678	F2rl1	coagulation factor II (thrombin) receptor-like 1	-0.423193	0.0411936	-0.52186	0.00156529	Yes	No	No
ENSMUSG00000014158	Trpv4	transient receptor potential cation channel, subfamily V, member 4	-0.421219	0.0363746	-0.114908	0.999999	Yes	No	No
ENSMUSG00000029999	Tgfa	transforming growth factor alpha	-0.416479	0.0118185	-0.466586	0.000994756	Yes	No	No
ENSMUSG00000031328	Flna	filamin, alpha	-0.412393	0.0181692	-0.409869	0.012247	No	Yes	No
ENSMUSG00000022136	Dnajc3	DnaJ heat shock protein family (Hsp40) member C3	-0.405137	0.0284015	-0.393047	0.0263308	Yes	No	No
ENSMUSG00000027598	Itch	itchy, E3 ubiquitin protein ligase	-0.393669	0.0441374	-0.371569	0.0548886	Yes	No	No
ENSMUSG00000030983	Bccip	BRCA2 and CDKN1A interacting protein	0.423329	0.0498243	0.0496575	0.999999	Yes	No	No
ENSMUSG00000022685	Parn	poly(A)-specific ribonuclease (deadenylation nuclease)	0.430369	0.00364675	0.677132	7.15063e-08	Yes	No	No
ENSMUSG00000022346	Myc	myelocytomatosis oncogene	0.432099	0.00369978	0.302629	0.253212	Yes	No	No	TF
ENSMUSG00000026019	Wdr12	WD repeat domain 12	0.432387	0.0372013	0.359598	0.127209	No	No	Yes
ENSMUSG00000020267	Hint1	histidine triad nucleotide binding protein 1	0.457446	0.0259676	0.0975948	0.999999	No	Yes	No
ENSMUSG00000036390	Gadd45a	growth arrest and DNA-damage-inducible 45 alpha	0.460301	0.00459877	0.280811	0.449127	Yes	No	No
ENSMUSG00000037499	Nenf	neuron derived neurotrophic factor	0.467907	0.0376644	0.212739	0.839626	Yes	No	No
ENSMUSG00000004069	Dnaja3	DnaJ heat shock protein family (Hsp40) member A3	0.468134	0.000498922	0.543543	7.07257e-06	Yes	No	No
ENSMUSG00000014599	Csf1	colony stimulating factor 1 (macrophage)	0.4724	0.0319507	1.07484	8.79478e-08	Yes	No	No
ENSMUSG00000033862	Cdk10	cyclin-dependent kinase 10	0.475505	0.0136995	0.488754	0.00525087	Yes	No	No	Kinase
ENSMUSG00000024986	Hhex	hematopoietically expressed homeobox	0.48418	0.0283929	0.71825	7.60158e-05	Yes	No	Yes	TF
ENSMUSG00000005718	Tfap4	transcription factor AP4	0.484698	0.00691689	0.554335	0.00041019	Yes	No	No	TF
ENSMUSG00000028576	Ift74	intraflagellar transport 74	0.488317	0.0219713	0.14683	0.999999	No	No	Yes
ENSMUSG00000068744	Psrc1	proline/serine-rich coiled-coil 1	0.493462	0.00350932	0.760734	4.08215e-07	Yes	No	No
ENSMUSG00000007739	Cct4	chaperonin containing Tcp1, subunit 4 (delta)	0.498595	0.0104072	0.168443	0.999999	Yes	No	No
ENSMUSG00000041390	Mdfic	MyoD family inhibitor domain containing	0.504079	0.00891383	0.742686	8.59378e-06	Yes	No	No
ENSMUSG00000020857	Nme2	NME/NM23 nucleoside diphosphate kinase 2	0.507026	0.029551	0.432175	0.0713096	No	Yes	No	Kinase
ENSMUSG00000029060	Mib2	mindbomb E3 ubiquitin protein ligase 2	0.523098	0.0134125	0.993605	3.61743e-07	No	No	Yes
ENSMUSG00000021548	Ccnh	cyclin H	0.532629	0.00330113	0.301291	0.366978	Yes	No	No
ENSMUSG00000028266	Lmo4	LIM domain only 4	0.574606	1.7918e-05	0.79609	4.51555e-09	Yes	No	No
ENSMUSG00000025190	Got1	glutamic-oxaloacetic transaminase 1, soluble	0.580002	3.01821e-05	0.469516	0.000866136	No	No	Yes
ENSMUSG00000022471	Xrcc6	X-ray repair complementing defective repair in Chinese hamster cells 6	0.581398	0.000109586	0.643306	4.96151e-06	Yes	No	No
ENSMUSG00000038564	Ift172	intraflagellar transport 172	0.589131	0.00023623	0.665114	9.68465e-06	No	No	Yes
ENSMUSG00000026872	Zeb2	zinc finger E-box binding homeobox 2	0.610409	0.0018337	1.27984	3.214e-09	Yes	No	No	TF
ENSMUSG00000027313	Chac1	ChaC, cation transport regulator 1	0.621213	7.61802e-05	0.464231	0.00449216	No	No	Yes
ENSMUSG00000057113	Npm1	nucleophosmin 1	0.638691	0.0020818	0.41313	0.0923706	Yes	No	No
ENSMUSG00000007655	Cav1	caveolin 1, caveolae protein	0.653734	1.85576e-05	0.709287	1.17963e-06	Yes	No	No
ENSMUSG00000021266	Wars	tryptophanyl-tRNA synthetase	0.66033	2.92591e-06	0.869684	3.20114e-09	Yes	No	No
ENSMUSG00000030827	Fgf21	fibroblast growth factor 21	0.66422	0.0409398	0.832311	0.00373107	Yes	No	No
ENSMUSG00000001520	Nrip2	nuclear receptor interacting protein 2	0.664799	1.76892e-05	1.00516	1.85369e-09	No	No	Yes
ENSMUSG00000021552	Gkap1	G kinase anchoring protein 1	0.675329	0.000497656	0.665166	0.0002223	No	Yes	No
ENSMUSG00000053040	Aph1c	aph1 homolog C, gamma secretase subunit	0.675536	0.0375621	0.732746	0.0113943	No	No	Yes
ENSMUSG00000039004	Bmp6	bone morphogenetic protein 6	0.691007	0.00411421	0.806454	0.000166348	Yes	No	No
ENSMUSG00000034855	Cxcl10	chemokine (C-X-C motif) ligand 10	0.694689	0.00285397	0.414618	0.124536	No	Yes	No
ENSMUSG00000025889	Snca	synuclein, alpha	0.697953	0.0126446	0.430352	0.16062	Yes	No	No
ENSMUSG00000017652	Cd40	CD40 antigen	0.744487	0.00863049	1.21943	1.48542e-05	Yes	No	No
ENSMUSG00000033159	Cnppd1	cyclin Pas1/PHO80 domain containing 1	0.787265	8.18557e-08	1.10595	4.34008e-11	Yes	No	No
ENSMUSG00000057604	Lmcd1	LIM and cysteine-rich domains 1	0.80158	0.000285915	0.710167	0.000538289	No	Yes	No
ENSMUSG00000035042	Ccl5	chemokine (C-C motif) ligand 5	0.847175	5.09313e-05	0.473686	0.0393121	Yes	No	No
ENSMUSG00000032826	Ank2	ankyrin 2, brain	0.904335	0.0455385	1.50377	0.00022704	No	Yes	No
ENSMUSG00000020623	Map2k6	mitogen-activated protein kinase kinase 6	0.962131	0.00537153	0.655271	0.051226	Yes	No	No	Kinase
ENSMUSG00000032715	Trib3	tribbles pseudokinase 3	1.09184	5.83196e-08	1.26782	1.26367e-09	Yes	No	No	Kinase
ENSMUSG00000024610	Cd74	CD74 antigen (invariant polypeptide of major histocompatibility complex, class II antigen-associated)	1.09769	0.000126522	1.5274	1.29293e-07	Yes	No	No
ENSMUSG00000055725	Paqr3	progestin and adipoQ receptor family member III	1.22157	8.37364e-08	1.74333	5.26948e-11	Yes	No	No
ENSMUSG00000000184	Ccnd2	cyclin D2	1.73315	0.00964217	2.02178	0.000186608	Yes	No	No
ENSMUSG00000042182	Bend6	BEN domain containing 6	2.2827	2.75628e-09	2.22164	4.19922e-10	No	No	Yes
ENSMUSG00000026674	Ddr2	discoidin domain receptor family, member 2	2.65184	4.62532e-06	4.45482	2.47478e-09	Yes	No	No	Kinase
