# Supplementary material for: Doxycycline Changes the Transcriptome Profile of mIMCD3 Renal Epithelial Cells
Source: Front Physiol. 2021 Nov 5;12:771691. doi: 10.3389/fphys.2021.771691 (PMC8602682; doi:10.3389/fphys.2021.771691)
Supplement: Supplementary file 4 [file Table_4.XLSX]

## Sheet: DEGs_mIMCD3_majorGOBP
			3 Days DOX treated mIMCD3		6 Days DOX treated mIMCD3		GOBP
Ensembl_gene_ID	Gene_symbol	Description	Log2Ratio 3D (DOX/DMSO)	FDR 3D 20% threshold	Log2Ratio 6D (DOX/DMSO)	FDR 6D 20% threshold	epithelial cell differentiation	epithelial cell proliferation	gland morphogenesis	urogenital system development	regulation of cytokine production	regulation of response to external stimulus	regulation of defense response	inflammatory response	taxis	response to interferon-beta
ENSMUSG00000005364	Il5ra	interleukin 5 receptor, alpha	-2.83508	2.07103e-05	-2.60566	1.26434e-05					Yes			Yes
ENSMUSG00000027962	Vcam1	vascular cell adhesion molecule 1	-2.40344	8.41479e-08	-2.35165	7.15063e-08									Yes
ENSMUSG00000017493	Igfbp4	insulin-like growth factor binding protein 4	-1.7282	1.3716e-07	-2.22591	1.85369e-09		Yes
ENSMUSG00000059668	Krt4	keratin 4	-1.69657	3.94105e-08	-2.8766	8.93198e-12	Yes	Yes
ENSMUSG00000079415	Cntf	ciliary neurotrophic factor	-1.66177	5.88621e-10	-2.05064	8.71574e-12					Yes	Yes		Yes
ENSMUSG00000043430	Psapl1	prosaposin-like 1	-1.58728	0.00186012	-1.36176	0.00319733	Yes			Yes
ENSMUSG00000074715	Ccl28	chemokine (C-C motif) ligand 28	-1.53183	0.00189818	-1.44536	0.0027146						Yes			Yes
ENSMUSG00000027843	Ptpn22	protein tyrosine phosphatase, non-receptor type 22 (lymphoid)	-1.45274	4.23187e-06	-2.28763	5.17258e-09					Yes	Yes	Yes
ENSMUSG00000028004	Npy2r	neuropeptide Y receptor Y2	-1.4506	0.000176656	-1.65348	1.58241e-05					Yes
ENSMUSG00000018623	Mmp7	matrix metallopeptidase 7	-1.39803	1.83398e-05	-1.87004	1.13882e-07					Yes
ENSMUSG00000021749	Oit1	oncoprotein induced transcript 1	-1.39654	3.27489e-06	-2.29076	1.20963e-09					Yes
ENSMUSG00000074272	Ceacam1	carcinoembryonic antigen-related cell adhesion molecule 1	-1.39559	0.000129841	-1.75629	4.64494e-06	Yes	Yes	Yes		Yes	Yes	Yes
ENSMUSG00000096001	2610528A11Rik	RIKEN cDNA 2610528A11 gene	-1.394	0.00178191	-2.50103	6.40444e-06									Yes
ENSMUSG00000029372	Ppbp	pro-platelet basic protein	-1.34274	7.60598e-10	-2.88688	1.15376e-15								Yes	Yes
ENSMUSG00000037868	Egr2	early growth response 2	-1.33657	0.000903207	-1.08985	0.0037956									Yes
ENSMUSG00000050359	Sprr1a	small proline-rich protein 1A	-1.33452	1.28098e-08	-2.8281	8.90313e-14	Yes
ENSMUSG00000042284	Itga1	integrin alpha 1	-1.32838	4.83987e-07	-1.58579	1.0176e-08									Yes
ENSMUSG00000031734	Irx3	Iroquois related homeobox 3	-1.31768	8.93544e-08	-1.22494	1.22878e-07				Yes
ENSMUSG00000032327	Stra6	stimulated by retinoic acid gene 6	-1.31455	8.75716e-05	-2.11087	9.11869e-08				Yes
ENSMUSG00000027358	Bmp2	bone morphogenetic protein 2	-1.28643	0.0491291	-2.0056	0.00202962	Yes	Yes		Yes				Yes
ENSMUSG00000032226	Gcnt3	glucosaminyl (N-acetyl) transferase 3, mucin type	-1.2809	0.000142327	-1.97109	1.66916e-07				Yes
ENSMUSG00000049709	Nlrp10	NLR family, pyrin domain containing 10	-1.26645	0.0156563	-2.38086	9.2813e-05					Yes	Yes	Yes	Yes
ENSMUSG00000025854	Fam20c	family with sequence similarity 20, member C	-1.20813	7.33516e-08	-0.787575	2.70526e-05	Yes
ENSMUSG00000038843	Gcnt1	glucosaminyl (N-acetyl) transferase 1, core 2	-1.19784	4.46842e-06	-1.27555	5.90701e-07				Yes
ENSMUSG00000017978	Cadps2	Ca2+-dependent activator protein for secretion 2	-1.19061	0.000606608	-1.34945	6.83149e-05					Yes
ENSMUSG00000005836	Gata6	GATA binding protein 6	-1.18918	0.00556168	-0.938564	0.0182845	Yes				Yes
ENSMUSG00000038264	Sema7a	sema domain, immunoglobulin domain (Ig), and GPI membrane anchor, (semaphorin) 7A	-1.18305	1.18676e-05	-1.51966	1.42473e-07					Yes	Yes	Yes	Yes	Yes
ENSMUSG00000021379	Id4	inhibitor of DNA binding 4	-1.15418	0.000937859	-2.57955	5.02218e-08			Yes	Yes
ENSMUSG00000012350	Ehf	ets homologous factor	-1.11739	6.87663e-10	-1.30648	9.54439e-12	Yes	Yes
ENSMUSG00000026185	Igfbp5	insulin-like growth factor binding protein 5	-1.10309	0.00863049	-1.38772	0.000445039		Yes	Yes			Yes
ENSMUSG00000026068	Il18rap	interleukin 18 receptor accessory protein	-1.08916	0.0110416	-1.03007	0.0128328					Yes		Yes	Yes
ENSMUSG00000062563	Cys1	cystin 1	-1.07551	5.23534e-08	-1.12586	9.79378e-09				Yes
ENSMUSG00000038151	Prdm1	PR domain containing 1, with ZNF domain	-1.07507	0.0214996	-2.06592	7.25685e-05	Yes					Yes
ENSMUSG00000028927	Padi2	peptidyl arginine deiminase, type II	-1.07167	2.16899e-05	-1.23829	1.20518e-06						Yes			Yes
ENSMUSG00000038393	Txnip	thioredoxin interacting protein	-1.06457	0.00214669	-2.82099	1.31838e-07	Yes
ENSMUSG00000026640	Plxna2	plexin A2	-1.06327	8.98063e-07	-1.49738	1.43309e-09									Yes
ENSMUSG00000066687	Zbtb16	zinc finger and BTB domain containing 16	-1.03826	0.00151773	-0.690678	0.0228882				Yes
ENSMUSG00000026473	Glul	glutamate-ammonia ligase (glutamine synthetase)	-1.03536	2.29161e-06	-1.09677	2.22002e-07		Yes			Yes
ENSMUSG00000035451	Foxa1	forkhead box A1	-1.02854	0.000269169	-1.10329	6.83149e-05	Yes		Yes	Yes
ENSMUSG00000019913	Sim1	single-minded family bHLH transcription factor 1	-1.02519	2.66464e-06	-1.0185	1.24219e-06				Yes
ENSMUSG00000037169	Mycn	v-myc avian myelocytomatosis viral related oncogene, neuroblastoma derived	-1.02151	0.00022363	-0.719533	0.00418664	Yes
ENSMUSG00000028108	Ecm1	extracellular matrix protein 1	-1.02102	9.05307e-09	-1.21076	1.18743e-10		Yes						Yes
ENSMUSG00000038668	Lpar1	lysophosphatidic acid receptor 1	-1.01878	0.00322315	-0.794852	0.0136263						Yes			Yes
ENSMUSG00000021938	Pspc1	paraspeckle protein 1	-1.01046	1.31477e-09	-1.24121	9.32494e-12							Yes
ENSMUSG00000040152	Thbs1	thrombospondin 1	-1.00832	0.000477911	-0.953638	0.000400118		Yes			Yes	Yes		Yes	Yes
ENSMUSG00000091387	Gcnt4	glucosaminyl (N-acetyl) transferase 4, core 2 (beta-1,6-N-acetylglucosaminyltransferase)	-1.00305	0.0205936	-1.09852	0.00778784				Yes
ENSMUSG00000071552	Tigit	T cell immunoreceptor with Ig and ITIM domains	-0.999647	0.00983174	-2.03329	2.08184e-06					Yes
ENSMUSG00000029371	Cxcl5	chemokine (C-X-C motif) ligand 5	-0.99838	3.02282e-05	-1.80067	1.53721e-09					Yes	Yes	Yes	Yes	Yes
ENSMUSG00000048373	Fgfbp1	fibroblast growth factor binding protein 1	-0.984203	0.00196075	-1.2817	3.85857e-05		Yes
ENSMUSG00000006310	Zbtb32	zinc finger and BTB domain containing 32	-0.983293	0.00648972	-1.57234	1.79498e-05					Yes
ENSMUSG00000022231	Sema5a	sema domain, seven thrombospondin repeats (type 1 and type 1-like), transmembrane domain (TM) and short cytoplasmic domain, (semaphorin) 5A	-0.976976	0.000869204	-0.649067	0.0192074		Yes				Yes			Yes
ENSMUSG00000015468	Notch4	notch 4	-0.963515	0.0432949	-1.59292	0.000637497	Yes
ENSMUSG00000039384	Dusp10	dual specificity phosphatase 10	-0.963031	2.16521e-07	-1.46056	6.13388e-11		Yes				Yes	Yes	Yes
ENSMUSG00000018774	Cd68	CD68 antigen	-0.959879	1.39255e-06	-0.896712	9.50547e-07								Yes
ENSMUSG00000030110	Ret	ret proto-oncogene	-0.959383	0.0241995	-1.4625	0.000720871				Yes
ENSMUSG00000005672	Kit	KIT proto-oncogene receptor tyrosine kinase	-0.957149	0.00744826	-1.02396	0.00276254		Yes			Yes			Yes	Yes
ENSMUSG00000051379	Flrt3	fibronectin leucine rich transmembrane protein 3	-0.945258	0.000177214	-1.55274	6.45564e-08									Yes
ENSMUSG00000024190	Dusp1	dual specificity phosphatase 1	-0.933657	8.98063e-07	-1.43424	1.59574e-10						Yes			Yes
ENSMUSG00000058427	Cxcl2	chemokine (C-X-C motif) ligand 2	-0.931126	0.0144051	-1.11027	0.00255625								Yes	Yes
ENSMUSG00000047250	Ptgs1	prostaglandin-endoperoxide synthase 1	-0.918098	7.25561e-06	-1.0436	3.78994e-07	Yes							Yes
ENSMUSG00000028064	Sema4a	sema domain, immunoglobulin domain (Ig), transmembrane domain (TM) and short cytoplasmic domain, (semaphorin) 4A	-0.910882	0.0284725	-0.889009	0.0206831						Yes			Yes
ENSMUSG00000019647	Sema6a	sema domain, transmembrane domain (TM), and cytoplasmic domain, (semaphorin) 6A	-0.907258	0.0241622	-1.84582	2.13173e-05						Yes			Yes
ENSMUSG00000015850	Adamtsl4	ADAMTS-like 4	-0.898677	4.82588e-07	-0.959214	6.51041e-08	Yes
ENSMUSG00000025810	Nrp1	neuropilin 1	-0.896193	1.87358e-06	-1.08119	3.31961e-08			Yes	Yes		Yes			Yes
ENSMUSG00000020185	E2f7	E2F transcription factor 7	-0.894921	2.33368e-06	-1.21369	5.80773e-09	Yes
ENSMUSG00000041688	Amot	angiomotin	-0.878506	5.33402e-05	-0.677099	0.000948743									Yes
ENSMUSG00000032193	Ldlr	low density lipoprotein receptor	-0.874918	1.31266e-06	-0.766721	5.05701e-06						Yes	Yes	Yes
ENSMUSG00000021699	Pde4d	phosphodiesterase 4D, cAMP specific	-0.858367	0.00728137	-1.06537	0.000519856									Yes
ENSMUSG00000037010	Apln	apelin	-0.85412	0.00127009	-1.45473	5.5097e-07		Yes			Yes
ENSMUSG00000044337	Ackr3	atypical chemokine receptor 3	-0.853519	0.00600482	-1.26608	4.00392e-05									Yes
ENSMUSG00000040998	Npnt	nephronectin	-0.852225	6.56846e-06	-0.616917	0.000513812				Yes
ENSMUSG00000023915	Tnfrsf21	tumor necrosis factor receptor superfamily, member 21	-0.848757	2.97522e-06	-1.15316	5.8209e-09					Yes
ENSMUSG00000028967	Errfi1	ERBB receptor feedback inhibitor 1	-0.844808	2.47774e-08	-0.898176	2.75574e-09	Yes	Yes			Yes
ENSMUSG00000032501	Trib1	tribbles pseudokinase 1	-0.844104	2.62991e-05	-0.698685	0.000202843						Yes
ENSMUSG00000028780	Sema3c	sema domain, immunoglobulin domain (Ig), short basic domain, secreted, (semaphorin) 3C	-0.840381	4.23622e-07	-1.02135	5.02496e-09			Yes			Yes			Yes
ENSMUSG00000054889	Dsp	desmoplakin	-0.840324	3.13528e-05	-0.749765	7.29146e-05	Yes
ENSMUSG00000032769	Trpa1	transient receptor potential cation channel, subfamily A, member 1	-0.838834	0.000866401	-1.16057	9.19311e-06					Yes
ENSMUSG00000052684	Jun	jun proto-oncogene	-0.836679	1.57637e-05	-1.25809	7.86903e-09	Yes	Yes						Yes
ENSMUSG00000028664	Ephb2	Eph receptor B2	-0.826827	0.000541834	-0.496169	0.0458805				Yes		Yes			Yes
ENSMUSG00000024621	Csf1r	colony stimulating factor 1 receptor	-0.821162	0.0071339	-0.627453	0.0343722					Yes			Yes	Yes
ENSMUSG00000031004	Mki67	antigen identified by monoclonal antibody Ki 67	-0.820226	5.93611e-06	-1.26261	1.25872e-09		Yes	Yes
ENSMUSG00000035775	Krt20	keratin 20	-0.816934	1.55729e-06	-1.32481	1.0322e-10					Yes
ENSMUSG00000022885	St6gal1	beta galactoside alpha 2,6 sialyltransferase 1	-0.816291	8.95436e-07	-0.607899	7.50292e-05						Yes			Yes
ENSMUSG00000003814	Calr	calreticulin	-0.816098	1.91852e-08	-0.54406	4.19612e-05						Yes			Yes
ENSMUSG00000051439	Cd14	CD14 antigen	-0.81433	2.7606e-05	-0.81255	1.45499e-05					Yes		Yes	Yes
ENSMUSG00000024395	Lims2	LIM and senescent cell antigen like domains 2	-0.811738	0.000434345	-1.51801	1.78416e-08		Yes	Yes
ENSMUSG00000038587	Akap12	A kinase (PRKA) anchor protein (gravin) 12	-0.810838	3.50059e-06	-0.908386	1.61396e-07					Yes
ENSMUSG00000050295	Foxc1	forkhead box C1	-0.806639	1.7918e-05	-0.58967	0.00104952	Yes			Yes
ENSMUSG00000024136	Dnase1l2	deoxyribonuclease 1-like 2	-0.794049	0.0166357	-1.28159	8.74049e-05	Yes
ENSMUSG00000054364	Rhob	ras homolog family member B	-0.786945	5.67756e-07	-0.924475	1.22648e-08						Yes
ENSMUSG00000004791	Pgf	placental growth factor	-0.77775	0.000563342	-1.61763	3.9277e-09		Yes		Yes		Yes			Yes
ENSMUSG00000021822	Plau	plasminogen activator, urokinase	-0.768763	4.38014e-07	-0.868845	1.34394e-08		Yes	Yes			Yes
ENSMUSG00000039952	Dag1	dystroglycan 1	-0.767394	2.35154e-05	-0.608141	0.00045383			Yes			Yes			Yes
ENSMUSG00000022037	Clu	clusterin	-0.760933	5.3789e-06	-0.747721	2.49804e-06					Yes			Yes
ENSMUSG00000050747	Trim15	tripartite motif-containing 15	-0.759507	0.0295135	-2.0658	3.42936e-07					Yes	Yes	Yes
ENSMUSG00000022893	Adamts1	a disintegrin-like and metallopeptidase (reprolysin type) with thrombospondin type 1 motif, 1	-0.7592	0.00426898	-0.605117	0.0165683				Yes
ENSMUSG00000001300	Efnb2	ephrin B2	-0.758326	9.23315e-06	-0.872526	2.57179e-07		Yes		Yes		Yes			Yes
ENSMUSG00000022636	Alcam	activated leukocyte cell adhesion molecule	-0.758192	6.45469e-05	-0.906529	1.34816e-06									Yes
ENSMUSG00000015619	Gata3	GATA binding protein 3	-0.742108	0.00856705	-0.970549	0.000251566	Yes	Yes		Yes	Yes	Yes	Yes	Yes	Yes
ENSMUSG00000032440	Tgfbr2	transforming growth factor, beta receptor II	-0.734055	8.98063e-07	-0.787908	7.55717e-08			Yes
ENSMUSG00000025153	Fasn	fatty acid synthase	-0.721878	3.13528e-05	-0.670528	4.90939e-05	Yes
ENSMUSG00000026479	Lamc2	laminin, gamma 2	-0.718109	2.76823e-05	-0.588066	0.00036892									Yes
ENSMUSG00000035000	Dpp4	dipeptidylpeptidase 4	-0.712064	0.000284738	-0.52531	0.00901896						Yes			Yes
ENSMUSG00000025885	Myo5b	myosin VB	-0.70451	0.000288956	-0.625235	0.000762505					Yes
ENSMUSG00000026235	Epha4	Eph receptor A4	-0.701369	0.00150422	-0.962459	1.01511e-05				Yes		Yes			Yes
ENSMUSG00000074743	Thbd	thrombomodulin	-0.69733	0.00183396	-0.610729	0.00451367						Yes
ENSMUSG00000047281	Sfn	stratifin	-0.689958	2.62831e-05	-1.18109	6.11567e-10	Yes	Yes
ENSMUSG00000031841	Cdh13	cadherin 13	-0.686176	0.0139039	-0.747261	0.00348317		Yes				Yes			Yes
ENSMUSG00000030539	Sema4b	sema domain, immunoglobulin domain (Ig), transmembrane domain (TM) and short cytoplasmic domain, (semaphorin) 4B	-0.686146	9.26048e-06	-0.573838	0.000114878						Yes			Yes
ENSMUSG00000009376	Met	met proto-oncogene	-0.685167	0.000239007	-0.632604	0.00037346	Yes		Yes		Yes	Yes			Yes
ENSMUSG00000055148	Klf2	Kruppel-like factor 2 (lung)	-0.680799	0.0118399	-1.09168	5.33254e-05	Yes				Yes
ENSMUSG00000048878	Hexim1	hexamethylene bis-acetamide inducible 1	-0.675541	1.30407e-05	-0.782521	2.53751e-07							Yes
ENSMUSG00000023032	Slc4a8	solute carrier family 4 (anion exchanger), member 8	-0.655126	0.0144321	-0.855978	0.000607698					Yes
ENSMUSG00000051076	Vtcn1	V-set domain containing T cell activation inhibitor 1	-0.649865	0.00216886	-0.775023	0.000114878					Yes
ENSMUSG00000037852	Cpe	carboxypeptidase E	-0.649068	1.10379e-05	-0.630154	7.39047e-06					Yes
ENSMUSG00000039457	Ppl	periplakin	-0.648084	0.000849522	-0.683749	0.000181707	Yes
ENSMUSG00000041120	Nbl1	neuroblastoma, suppression of tumorigenicity 1	-0.648047	0.00607189	-1.23893	6.53794e-07						Yes			Yes
ENSMUSG00000027765	P2ry1	purinergic receptor P2Y, G-protein coupled 1	-0.64287	0.00750835	-1.18964	1.53998e-06					Yes
ENSMUSG00000029135	Fosl2	fos-like antigen 2	-0.642816	0.000154485	-0.781179	1.90248e-06	Yes
ENSMUSG00000033792	Atp7a	ATPase, Cu++ transporting, alpha polypeptide	-0.642722	0.00114981	-0.64698	0.000566965		Yes
ENSMUSG00000003051	Elf3	E74-like factor 3	-0.639306	8.7861e-06	-0.846172	8.91739e-09	Yes		Yes					Yes
ENSMUSG00000032402	Smad3	SMAD family member 3	-0.638567	0.000172697	-0.500737	0.00367191	Yes	Yes		Yes	Yes	Yes	Yes	Yes	Yes
ENSMUSG00000021823	Vcl	vinculin	-0.638333	0.0007754	-0.744078	3.11855e-05	Yes
ENSMUSG00000029167	Ppargc1a	peroxisome proliferative activated receptor, gamma, coactivator 1 alpha	-0.631966	0.0122536	-0.552085	0.0241066						Yes
ENSMUSG00000032035	Ets1	E26 avian leukemia oncogene 1, 5' domain	-0.630431	0.000557472	-0.54506	0.00234421						Yes	Yes	Yes
ENSMUSG00000037003	Tns2	tensin 2	-0.627666	0.000129841	-0.458321	0.0087986				Yes
ENSMUSG00000021070	Bdkrb2	bradykinin receptor, beta 2	-0.622867	0.00759908	-0.796692	0.000233243								Yes
ENSMUSG00000046179	E2f8	E2F transcription factor 8	-0.619224	1.18676e-05	-1.13719	4.20297e-11	Yes
ENSMUSG00000029380	Cxcl1	chemokine (C-X-C motif) ligand 1	-0.615848	0.0097512	-1.20738	1.0054e-06						Yes	Yes	Yes	Yes
ENSMUSG00000027087	Itgav	integrin alpha V	-0.615187	0.00115108	-0.63536	0.000353495					Yes			Yes	Yes
ENSMUSG00000031278	Acsl4	acyl-CoA synthetase long-chain family member 4	-0.6114	0.00155737	-0.429904	0.0481664					Yes
ENSMUSG00000029381	Shroom3	shroom family member 3	-0.610371	2.31536e-05	-0.696936	5.63397e-07	Yes
ENSMUSG00000042460	C1galt1	core 1 synthase, glycoprotein-N-acetylgalactosamine 3-beta-galactosyltransferase, 1	-0.609581	0.00427274	-0.490769	0.0240706	Yes			Yes
ENSMUSG00000019850	Tnfaip3	tumor necrosis factor, alpha-induced protein 3	-0.607918	7.10118e-05	-0.81766	7.90533e-08		Yes	Yes		Yes	Yes	Yes	Yes
ENSMUSG00000025473	Adam8	a disintegrin and metallopeptidase domain 8	-0.606603	0.000585485	-1.07891	1.38128e-08					Yes	Yes	Yes	Yes	Yes
ENSMUSG00000074794	Arrdc3	arrestin domain containing 3	-0.606416	0.000315066	-1.01327	1.36633e-08						Yes
ENSMUSG00000001420	Tmem79	transmembrane protein 79	-0.604111	0.000280815	-0.648566	3.70259e-05	Yes
ENSMUSG00000039942	Ptger4	prostaglandin E receptor 4 (subtype EP4)	-0.600988	0.00556863	-0.590516	0.00347142					Yes	Yes	Yes	Yes
ENSMUSG00000053646	Plxnb1	plexin B1	-0.596787	0.0054443	-0.522782	0.0131933									Yes
ENSMUSG00000037820	Tgm2	transglutaminase 2, C polypeptide	-0.594407	0.000144995	-0.450567	0.00666002			Yes			Yes	Yes	Yes
ENSMUSG00000022353	Mtss1	metastasis suppressor 1	-0.592882	0.000927502	-0.619899	0.000221791	Yes	Yes		Yes
ENSMUSG00000021367	Edn1	endothelin 1	-0.591801	0.00358013	-0.838487	7.39712e-06					Yes	Yes			Yes
ENSMUSG00000021182	Ccdc88c	coiled-coil domain containing 88C	-0.590492	0.000819789	-0.564253	0.000886018	Yes
ENSMUSG00000054252	Fgfr3	fibroblast growth factor receptor 3	-0.584239	0.0351126	-0.526275	0.0438201	Yes	Yes
ENSMUSG00000053128	Rnf26	ring finger protein 26	-0.583516	0.00156136	-0.564563	0.0012986					Yes	Yes	Yes
ENSMUSG00000031438	Rnf128	ring finger protein 128	-0.577613	0.000670238	-0.643613	4.32044e-05					Yes
ENSMUSG00000030257	Srgap3	SLIT-ROBO Rho GTPase activating protein 3	-0.574036	0.00196075	-0.546267	0.00219244						Yes
ENSMUSG00000033788	Dysf	dysferlin	-0.573239	0.000416829	-0.661333	1.42065e-05		Yes			Yes	Yes			Yes
ENSMUSG00000040451	Sgms1	sphingomyelin synthase 1	-0.567474	0.000491686	-0.627812	3.47639e-05								Yes
ENSMUSG00000021453	Gadd45g	growth arrest and DNA-damage-inducible 45 gamma	-0.565194	0.00964217	-0.637916	0.00126438					Yes
ENSMUSG00000029482	Aacs	acetoacetyl-CoA synthetase	-0.559572	0.000172697	-0.525468	0.000234906					Yes
ENSMUSG00000068876	Cgn	cingulin	-0.558909	0.000284095	-0.675141	2.77188e-06	Yes
ENSMUSG00000070047	Fat1	FAT atypical cadherin 1	-0.555809	0.00288966	-0.610156	0.00038458	Yes
ENSMUSG00000034127	Tspan8	tetraspanin 8	-0.553654	0.00318023	-1.37032	3.65512e-10						Yes
ENSMUSG00000031488	Rab11fip1	RAB11 family interacting protein 1 (class I)	-0.550663	0.00104823	-0.559417	0.000400483					Yes
ENSMUSG00000070056	Mfhas1	malignant fibrous histiocytoma amplified sequence 1	-0.54818	0.000285318	-0.443149	0.00542712						Yes	Yes	Yes
ENSMUSG00000043895	S1pr2	sphingosine-1-phosphate receptor 2	-0.547871	0.0247288	-0.633324	0.00373174	Yes
ENSMUSG00000020679	Hnf1b	HNF1 homeobox B	-0.543858	0.000903207	-0.553584	0.000321752	Yes	Yes		Yes	Yes
ENSMUSG00000038700	Hoxb5	homeobox B5	-0.541769	0.0340096	-0.497419	0.0487976	Yes
ENSMUSG00000026031	Cflar	CASP8 and FADD-like apoptosis regulator	-0.541589	0.00523161	-0.556818	0.00198528		Yes	Yes	Yes
ENSMUSG00000028068	Iqgap3	IQ motif containing GTPase activating protein 3	-0.538547	0.00395951	-0.810327	2.16436e-06		Yes
ENSMUSG00000005958	Ephb3	Eph receptor B3	-0.536402	0.0134125	-0.665586	0.000532227				Yes					Yes
ENSMUSG00000022952	Runx1	runt related transcription factor 1	-0.534762	0.00253454	-0.611487	0.000160833					Yes
ENSMUSG00000027778	Ift80	intraflagellar transport 80	-0.532625	0.00331233	-0.651145	6.47e-05		Yes
ENSMUSG00000033577	Myo6	myosin VI	-0.530749	0.00104823	-0.421696	0.0169535	Yes
ENSMUSG00000052397	Ezr	ezrin	-0.526182	7.72449e-05	-0.60206	1.46674e-06	Yes				Yes
ENSMUSG00000020644	Id2	inhibitor of DNA binding 2	-0.522244	0.0137191	-1.59109	2.97475e-10	Yes	Yes		Yes					Yes
ENSMUSG00000022469	Rapgef3	Rap guanine nucleotide exchange factor (GEF) 3	-0.52135	0.0160623	-0.962912	9.42399e-07	Yes
ENSMUSG00000047821	Trim16	tripartite motif-containing 16	-0.520287	0.0105684	-0.690764	0.000103121	Yes				Yes
ENSMUSG00000032086	Bace1	beta-site APP cleaving enzyme 1	-0.518022	0.0071339	-0.43419	0.032548						Yes
ENSMUSG00000024812	Tjp2	tight junction protein 2	-0.517427	0.00113264	-0.497969	0.00109235	Yes
ENSMUSG00000032220	Myo1e	myosin IE	-0.515407	0.00297665	-0.454018	0.00942259	Yes			Yes
ENSMUSG00000031668	Eif2ak3	eukaryotic translation initiation factor 2 alpha kinase 3	-0.513365	0.0172864	-0.785289	2.62447e-05					Yes
ENSMUSG00000032846	Zswim6	zinc finger SWIM-type containing 6	-0.507655	0.016373	-0.542416	0.00453305						Yes			Yes
ENSMUSG00000022218	Tgm1	transglutaminase 1, K polypeptide	-0.501922	0.00963547	-0.851269	9.11474e-07	Yes	Yes
ENSMUSG00000028820	Sfpq	splicing factor proline/glutamine rich (polypyrimidine tract binding protein associated)	-0.501245	0.000502757	-0.696586	2.08786e-07							Yes
ENSMUSG00000038418	Egr1	early growth response 1	-0.500085	0.00459877	-0.590438	0.000161416				Yes	Yes
ENSMUSG00000021125	Arg2	arginase type II	-0.498859	0.0272631	-0.759395	5.35165e-05				Yes	Yes	Yes	Yes
ENSMUSG00000042699	Dhx9	DEAH (Asp-Glu-Ala-His) box polypeptide 9	-0.497118	0.000841751	-0.854975	5.36749e-09					Yes	Yes	Yes	Yes
ENSMUSG00000007872	Id3	inhibitor of DNA binding 3	-0.495031	0.0169461	-1.55684	1.05291e-10	Yes			Yes
ENSMUSG00000031075	Ano1	anoctamin 1, calcium activated chloride channel	-0.489801	0.00504223	-0.530039	0.000783112					Yes
ENSMUSG00000034101	Ctnnd1	catenin (cadherin associated protein), delta 1	-0.48979	0.016453	-0.590326	0.000832045	Yes		Yes	Yes
ENSMUSG00000025083	Afap1l2	actin filament associated protein 1-like 2	-0.487517	0.00220996	-0.620245	1.11812e-05					Yes			Yes
ENSMUSG00000037012	Hk1	hexokinase 1	-0.483898	0.00425659	-0.647831	1.11554e-05					Yes			Yes
ENSMUSG00000026605	Cenpf	centromere protein F	-0.482139	0.0244883	-0.750255	3.11855e-05				Yes
ENSMUSG00000022512	Cldn1	claudin 1	-0.477856	0.0470332	-0.759596	9.68023e-05	Yes	Yes
ENSMUSG00000017146	Brca1	breast cancer 1, early onset	-0.476633	0.00486136	-0.673235	4.45888e-06					Yes
ENSMUSG00000029304	Spp1	secreted phosphoprotein 1	-0.464679	0.0105384	-0.76388	8.82088e-07					Yes				Yes
ENSMUSG00000058056	Palld	palladin, cytoskeletal associated protein	-0.463322	0.0498349	-0.758617	7.06429e-05	Yes
ENSMUSG00000042306	S100a14	S100 calcium binding protein A14	-0.457505	0.0144109	-1.10745	1.54383e-09						Yes	Yes		Yes
ENSMUSG00000006456	Rbm14	RNA binding motif protein 14	-0.455314	0.00877714	-0.492104	0.00156529							Yes
ENSMUSG00000020733	Slc9a3r1	solute carrier family 9 (sodium/hydrogen exchanger), member 3 regulator 1	-0.451876	0.00955199	-0.472173	0.00273713	Yes		Yes			Yes
ENSMUSG00000033685	Ucp2	uncoupling protein 2 (mitochondrial, proton carrier)	-0.44894	0.00475824	-0.66747	8.75948e-07					Yes
ENSMUSG00000026971	Itgb6	integrin beta 6	-0.44786	0.0173543	-0.631755	3.9027e-05					Yes			Yes
ENSMUSG00000037815	Ctnna1	catenin (cadherin associated protein), alpha 1	-0.447694	0.00617756	-0.482319	0.000955513						Yes
ENSMUSG00000001228	Uhrf1	ubiquitin-like, containing PHD and RING finger domains, 1	-0.443745	0.00227228	-0.594113	1.96347e-06		Yes
ENSMUSG00000031731	Ap1g1	adaptor protein complex AP-1, gamma 1 subunit	-0.438609	0.0118543	-0.47869	0.00179091					Yes		Yes
ENSMUSG00000019943	Atp2b1	ATPase, Ca++ transporting, plasma membrane 1	-0.433482	0.0312333	-0.402875	0.0434662					Yes
ENSMUSG00000047139	Cd24a	CD24a antigen	-0.430754	0.034841	-0.641676	5.02675e-05					Yes	Yes	Yes	Yes
ENSMUSG00000048118	Arid4a	AT rich interactive domain 4A (RBP1-like)	-0.425348	0.0178271	-0.480562	0.00172622	Yes
ENSMUSG00000021678	F2rl1	coagulation factor II (thrombin) receptor-like 1	-0.423193	0.0411936	-0.52186	0.00156529	Yes				Yes	Yes	Yes	Yes	Yes
ENSMUSG00000029999	Tgfa	transforming growth factor alpha	-0.416479	0.0118185	-0.466586	0.000994756		Yes	Yes
ENSMUSG00000031328	Flna	filamin, alpha	-0.412393	0.0181692	-0.409869	0.012247	Yes					Yes
ENSMUSG00000030583	Sipa1l3	signal-induced proliferation-associated 1 like 3	-0.406255	0.0401496	-0.401558	0.0303504	Yes
ENSMUSG00000034640	Tiparp	TCDD-inducible poly(ADP-ribose) polymerase	-0.39154	0.0411936	-0.427531	0.0075626				Yes
ENSMUSG00000022971	Ifnar2	interferon (alpha and beta) receptor 2	0.407519	0.0254956	0.461988	0.00224957										Yes
ENSMUSG00000046879	Irgm1	immunity-related GTPase family M member 1	0.408627	0.0107485	0.50464	0.000103325							Yes			Yes
ENSMUSG00000040888	Gfer	growth factor, augmenter of liver regeneration	0.418549	0.0439415	0.421767	0.025475							Yes
ENSMUSG00000031671	Setd6	SET domain containing 6	0.424002	0.0293857	0.492393	0.0019338						Yes	Yes	Yes
ENSMUSG00000028173	Wls	wntless WNT ligand secretion mediator	0.425205	0.00353116	0.680644	4.48411e-08					Yes
ENSMUSG00000026104	Stat1	signal transducer and activator of transcription 1	0.438157	0.00789706	0.717436	2.43625e-07		Yes		Yes	Yes	Yes	Yes			Yes
ENSMUSG00000015714	Cers2	ceramide synthase 2	0.43885	0.00350552	0.557832	1.19353e-05						Yes
ENSMUSG00000040728	Esrp1	epithelial splicing regulatory protein 1	0.438974	0.00510261	0.41101	0.00831623	Yes	Yes	Yes
ENSMUSG00000030966	Trim21	tripartite motif-containing 21	0.454806	0.0147147	0.908777	2.71792e-08						Yes
ENSMUSG00000039197	Adk	adenosine kinase	0.46051	0.0245143	0.488773	0.00645281		Yes
ENSMUSG00000073490	Ifi207	interferon activated gene 207	0.466315	0.0232154	0.898336	3.08205e-07										Yes
ENSMUSG00000004069	Dnaja3	DnaJ heat shock protein family (Hsp40) member A3	0.468134	0.000498922	0.543543	7.07257e-06							Yes
ENSMUSG00000033540	Idua	iduronidase, alpha-L	0.468711	0.0429818	0.811604	1.12059e-05					Yes
ENSMUSG00000037321	Tap1	transporter 1, ATP-binding cassette, sub-family B (MDR/TAP)	0.471028	0.00888372	1.30015	4.91584e-11							Yes
ENSMUSG00000014599	Csf1	colony stimulating factor 1 (macrophage)	0.4724	0.0319507	1.07484	8.79478e-08			Yes			Yes		Yes	Yes
ENSMUSG00000028268	Gbp3	guanylate binding protein 3	0.47618	0.0148405	1.234	7.74286e-10										Yes
ENSMUSG00000025980	Hspd1	heat shock protein 1 (chaperonin)	0.476527	0.00445249	0.602651	3.3885e-05					Yes	Yes	Yes	Yes
ENSMUSG00000026896	Ifih1	interferon induced with helicase C domain 1	0.479796	0.00390957	0.754545	3.34577e-07					Yes		Yes
ENSMUSG00000024986	Hhex	hematopoietically expressed homeobox	0.48418	0.0283929	0.71825	7.60158e-05	Yes
ENSMUSG00000068329	Htra2	HtrA serine peptidase 2	0.487606	0.00916827	0.473525	0.00698949										Yes
ENSMUSG00000002325	Irf9	interferon regulatory factor 9	0.492124	0.00032342	0.549382	1.15943e-05					Yes
ENSMUSG00000028059	Arhgef2	rho/rac guanine nucleotide exchange factor (GEF) 2	0.494893	0.000841667	0.774143	3.10551e-08					Yes
ENSMUSG00000026234	Ncl	nucleolin	0.497143	0.00462246	0.474305	0.00495202					Yes
ENSMUSG00000020464	Pnpt1	polyribonucleotide nucleotidyltransferase 1	0.501975	0.000841751	0.499874	0.000397913										Yes
ENSMUSG00000056486	Chn1	chimerin 1	0.506074	0.0209215	0.52376	0.00835601									Yes
ENSMUSG00000104713	Gbp6	guanylate binding protein 6	0.509709	0.0071339	1.13824	3.18942e-09										Yes
ENSMUSG00000056220	Pla2g4a	phospholipase A2, group IVA (cytosolic, calcium-dependent)	0.511966	0.00117474	0.506336	0.000585719						Yes	Yes	Yes
ENSMUSG00000068739	Sars	seryl-aminoacyl-tRNA synthetase	0.516155	0.000968507	0.458618	0.0034967					Yes
ENSMUSG00000038552	Fndc4	fibronectin type III domain containing 4	0.518652	0.00178037	0.714002	1.61706e-06						Yes	Yes	Yes
ENSMUSG00000022043	Trim35	tripartite motif-containing 35	0.520956	0.00152714	0.901957	1.78416e-08						Yes
ENSMUSG00000017830	Dhx58	DEXH (Asp-Glu-X-His) box polypeptide 58	0.521827	0.00235865	0.823958	2.14232e-07					Yes	Yes	Yes
ENSMUSG00000037921	Ddx60	DEAD (Asp-Glu-Ala-Asp) box polypeptide 60	0.538246	0.0062769	0.891933	9.51316e-07					Yes	Yes	Yes
ENSMUSG00000006611	Hfe	hemochromatosis	0.548224	0.0334144	0.761487	0.000448085					Yes
ENSMUSG00000016206	H2-M3	histocompatibility 2, M region locus 3	0.561009	0.00728137	0.82138	8.03913e-06					Yes		Yes
ENSMUSG00000025498	Irf7	interferon regulatory factor 7	0.565164	0.000776373	0.854147	1.63793e-07					Yes		Yes
ENSMUSG00000016496	Cd274	CD274 antigen	0.575844	0.00189627	1.32857	3.85386e-10					Yes
ENSMUSG00000022471	Xrcc6	X-ray repair complementing defective repair in Chinese hamster cells 6	0.581398	0.000109586	0.643306	4.96151e-06							Yes
ENSMUSG00000025492	Ifitm3	interferon induced transmembrane protein 3	0.581649	0.000841379	0.826494	7.27546e-07										Yes
ENSMUSG00000018446	C1qbp	complement component 1, q subcomponent binding protein	0.584319	0.000144995	0.512253	0.00070564					Yes	Yes	Yes	Yes	Yes
ENSMUSG00000005699	Pard6a	par-6 family cell polarity regulator alpha	0.586065	0.000760842	0.527886	0.00165838					Yes
ENSMUSG00000038564	Ift172	intraflagellar transport 172	0.589131	0.00023623	0.665114	9.68465e-06		Yes
ENSMUSG00000034459	Ifit1	interferon-induced protein with tetratricopeptide repeats 1	0.592947	5.18687e-05	0.674788	1.30659e-06										Yes
ENSMUSG00000046718	Bst2	bone marrow stromal cell antigen 2	0.595488	0.000838588	0.562898	0.000973405										Yes
ENSMUSG00000037664	Cdkn1c	cyclin-dependent kinase inhibitor 1C (P57)	0.601224	0.00433385	0.747216	5.78509e-05	Yes			Yes
ENSMUSG00000044986	Tst	thiosulfate sulfurtransferase, mitochondrial	0.60989	0.0106422	0.772083	0.000278158	Yes
ENSMUSG00000026872	Zeb2	zinc finger E-box binding homeobox 2	0.610409	0.0018337	1.27984	3.214e-09	Yes
ENSMUSG00000073489	Ifi204	interferon activated gene 204	0.614901	0.00117474	0.672999	0.00013448					Yes		Yes			Yes
ENSMUSG00000062995	Ica1	islet cell autoantigen 1	0.617671	0.00150461	0.878697	1.7468e-06					Yes
ENSMUSG00000026142	Rhbdd1	rhomboid domain containing 1	0.618531	0.000162582	1.02297	5.78896e-09					Yes
ENSMUSG00000078920	Ifi47	interferon gamma inducible protein 47	0.626472	0.00416466	0.919312	8.79976e-06										Yes
ENSMUSG00000025887	Casp12	caspase 12	0.629848	0.0185106	1.0474	3.11855e-05						Yes	Yes	Yes
ENSMUSG00000040618	Pck2	phosphoenolpyruvate carboxykinase 2 (mitochondrial)	0.64147	1.56761e-05	0.811488	4.48411e-08	Yes				Yes
ENSMUSG00000007655	Cav1	caveolin 1, caveolae protein	0.653734	1.85576e-05	0.709287	1.17963e-06	Yes	Yes	Yes			Yes	Yes
ENSMUSG00000006800	Sulf2	sulfatase 2	0.660744	0.00178191	1.78908	4.34008e-11		Yes	Yes	Yes	Yes
ENSMUSG00000020641	Rsad2	radical S-adenosyl methionine domain containing 2	0.66496	0.00102051	1.01021	1.0054e-06					Yes		Yes
ENSMUSG00000040483	Xaf1	XIAP associated factor 1	0.672374	3.28583e-05	0.511513	0.00165621										Yes
ENSMUSG00000053040	Aph1c	aph1 homolog C, gamma secretase subunit	0.675536	0.0375621	0.732746	0.0113943				Yes
ENSMUSG00000032679	Cd59a	CD59a antigen	0.683293	0.00162362	0.734514	0.000282366					Yes	Yes	Yes	Yes
ENSMUSG00000039004	Bmp6	bone morphogenetic protein 6	0.691007	0.00411421	0.806454	0.000166348	Yes	Yes		Yes	Yes	Yes		Yes
ENSMUSG00000030107	Usp18	ubiquitin specific peptidase 18	0.710348	2.76012e-06	0.660528	3.6589e-06						Yes	Yes	Yes
ENSMUSG00000020319	Wdpcp	WD repeat containing planar cell polarity effector	0.711773	0.00234495	0.574336	0.0119229	Yes			Yes
ENSMUSG00000046186	Cd109	CD109 antigen	0.734846	0.0263946	1.59689	1.58822e-06	Yes	Yes				Yes
ENSMUSG00000017652	Cd40	CD40 antigen	0.744487	0.00863049	1.21943	1.48542e-05					Yes			Yes
ENSMUSG00000026536	Ifi211	interferon activated gene 211	0.832502	4.20227e-05	0.841638	1.38132e-05					Yes		Yes			Yes
ENSMUSG00000035042	Ccl5	chemokine (C-C motif) ligand 5	0.847175	5.09313e-05	0.473686	0.0393121		Yes			Yes	Yes	Yes	Yes	Yes
ENSMUSG00000035692	Isg15	ISG15 ubiquitin-like modifier	0.847447	2.60976e-05	0.497754	0.0153724					Yes
ENSMUSG00000016481	Cr1l	complement component (3b/4b) receptor 1-like	0.855251	1.96918e-07	0.836718	8.79819e-08						Yes	Yes	Yes
ENSMUSG00000006205	Htra1	HtrA serine peptidase 1	0.877296	3.01084e-06	1.3903	3.44648e-10		Yes				Yes	Yes
ENSMUSG00000025408	Ddit3	DNA-damage inducible transcript 3	0.904098	4.49468e-07	0.59651	0.000286441					Yes
ENSMUSG00000013089	Etv5	ets variant 5	0.931312	2.07103e-05	1.12776	3.96001e-07			Yes
ENSMUSG00000033538	Casp4	caspase 4, apoptosis-related cysteine peptidase	0.932518	2.50598e-05	1.30345	3.52971e-08					Yes	Yes	Yes	Yes
ENSMUSG00000028883	Sema3a	sema domain, immunoglobulin domain (Ig), short basic domain, secreted, (semaphorin) 3A	0.948357	0.000194163	1.25698	1.30659e-06			Yes			Yes			Yes
ENSMUSG00000029378	Areg	amphiregulin	1.03322	0.000693353	0.844718	0.00170062		Yes	Yes
ENSMUSG00000030087	Klf15	Kruppel-like factor 15	1.04948	0.00788633	2.71986	1.61282e-08	Yes			Yes
ENSMUSG00000024610	Cd74	CD74 antigen (invariant polypeptide of major histocompatibility complex, class II antigen-associated)	1.09769	0.000126522	1.5274	1.29293e-07					Yes	Yes	Yes		Yes
ENSMUSG00000019986	Ahi1	Abelson helper integration site 1	1.14648	2.91264e-07	1.19006	2.96097e-08	Yes			Yes	Yes
ENSMUSG00000005124	Ccn4	cellular communication network factor 4	1.23738	0.00330113	1.74182	3.06388e-05					Yes	Yes	Yes	Yes
ENSMUSG00000027950	Chrnb2	cholinergic receptor, nicotinic, beta polypeptide 2 (neuronal)	1.32131	0.0086014	1.89121	0.000131671					Yes
ENSMUSG00000039158	Akna	AT-hook transcription factor	1.57255	5.02807e-08	2.26718	4.0058e-11						Yes	Yes	Yes
ENSMUSG00000074818	Pdzd7	PDZ domain containing 7	1.72067	1.56295e-08	1.96024	3.76352e-10	Yes
ENSMUSG00000000184	Ccnd2	cyclin D2	1.73315	0.00964217	2.02178	0.000186608		Yes
